# Supplementary material for: Resilience in a time of stress: revealing the molecular underpinnings of coral survival following thermal bleaching events
Source: Research Square preprint supplement (doi:10.21203/rs.3.rs-4566379/v1), 2024-07-03
Supplement: Supplementary file 1 [file 035711eb14525e95d8881171.xlsx]

## Sheet: README
TAB	DESCRIPTION
A_Protein_T1.R	list of proteins confidently identified with >2 peptides in resilient corals at timepoint 1 from ABACUS file (I_ABACUS_output)
B_Protein_T1.S	list of proteins confidently identified with >2 peptides in susceptible corals at timepoint 1 from ABACUS file (I_ABACUS_output)
C_Protein_T2.R	list of proteins confidently identified with >2 peptides in resilient corals at timepoint 2 from ABACUS file (I_ABACUS_output)
D_Protein_T2.S	list of proteins confidently identified with >2 peptides in susceptible corals at timepoint 1 from ABACUS file (I_ABACUS_output)
E_R.S.ValidProt_ADJNSAF	List of only confidently identified proteins in one of the cohorts with calcualted Adjusted Normalized Spectral Abundance Factors (ADJNSAF) from each mass spectrometry analysis of each colony. Values extracted from I_ABACUS_output file.
F_MC.MASTER.ANNOTATE	Master annotation spreadsheet. M. capitata protein data was BLASTED against NCBI nr database and UniprotKB Swiss-prot database. KEGG IDs were retrieved from BlastKoala.
G_QSPEC.T1.R.S	Qspec results for comparisons of resistant vs susceptible coral colonies analyzed by MS for Timepoint 1
H_QSPEC.T2.R.S.	Qspec results for comparisons of resistant vs susceptible coral colonies analyzed by MS for Timepoint 2
I_ABACUS_output_	ABACUS output file for all mass spectrometry analyses on all coral samples explored.

## Sheet: A_Protein_T1.R
Protein
lcl|c169761_g1_i1|m.505
lcl|c235791_g2_i8|m.21336
lcl|c235847_g2_i10|m.21377
lcl|c235850_g2_i3|m.21382
lcl|c235861_g2_i5|m.21394
lcl|c235959_g6_i1|m.21503
lcl|c235993_g2_i2|m.21545
lcl|c236015_g2_i16|m.21586
lcl|c236035_g1_i2|m.21599
lcl|c236101_g5_i2|m.21702
lcl|c236120_g2_i1|m.21731
lcl|c236131_g3_i3|m.21740
lcl|c236134_g1_i2|m.21741
lcl|c236135_g4_i5|m.21746
lcl|c236181_g1_i2|m.21806
lcl|c211368_g3_i1|m.2426
lcl|c236286_g4_i1|m.21959
lcl|c236333_g1_i1|m.22011
lcl|c236351_g2_i1|m.22019
lcl|c236389_g1_i1|m.22061
lcl|c236507_g1_i5|m.22184
lcl|c236507_g1_i6|m.22186
lcl|c236523_g2_i4|m.22204
lcl|c211415_g1_i1|m.2432
lcl|c236527_g2_i1|m.22205
lcl|c236562_g3_i1|m.22244
lcl|c236655_g1_i2|m.22362
lcl|c236666_g2_i2|m.22384
lcl|c236706_g2_i4|m.22417
lcl|c236734_g2_i3|m.22454
lcl|c236795_g1_i2|m.22544
lcl|c236813_g3_i2|m.22564
lcl|c236822_g3_i10|m.22574
lcl|c236844_g2_i5|m.22607
lcl|c211436_g1_i2|m.2434
lcl|c236878_g1_i2|m.22651
lcl|c236902_g2_i4|m.22682
lcl|c236923_g1_i10|m.22692
lcl|c237097_g2_i1|m.22905
lcl|c237098_g1_i2|m.22911
lcl|c237130_g1_i4|m.22955
lcl|c237136_g1_i1|m.22958
lcl|c237136_g3_i1|m.22962
lcl|c237191_g2_i5|m.23010
lcl|c211551_g6_i4|m.2453
lcl|c237207_g2_i2|m.23024
lcl|c237211_g6_i4|m.23025
lcl|c237215_g1_i1|m.23031
lcl|c237256_g2_i1|m.23076
lcl|c237320_g5_i2|m.23157
lcl|c237325_g2_i1|m.23163
lcl|c237387_g1_i1|m.23217
lcl|c237405_g1_i2|m.23236
lcl|c237440_g3_i2|m.23273
lcl|c211553_g1_i1|m.2455
lcl|c237490_g5_i6|m.23318
lcl|c237560_g2_i1|m.23397
lcl|c237587_g5_i1|m.23455
lcl|c237591_g3_i1|m.23457
lcl|c237591_g3_i4|m.23458
lcl|c237613_g1_i3|m.23496
lcl|c211563_g8_i2|m.2460
lcl|c237702_g1_i1|m.23627
lcl|c237753_g2_i2|m.23709
lcl|c237792_g3_i2|m.23754
lcl|c237832_g1_i6|m.23803
lcl|c237887_g2_i1|m.23860
lcl|c237891_g2_i2|m.23861
lcl|c237894_g6_i1|m.23869
lcl|c237953_g4_i1|m.23928
lcl|c237969_g1_i5|m.23942
lcl|c211604_g1_i1|m.2470
lcl|c238048_g5_i2|m.24043
lcl|c238052_g1_i4|m.24050
lcl|c238085_g2_i5|m.24082
lcl|c238173_g3_i3|m.24203
lcl|c238175_g2_i3|m.24204
lcl|c238200_g3_i4|m.24238
lcl|c211615_g1_i2|m.2471
lcl|c238340_g1_i7|m.24404
lcl|c238365_g3_i1|m.24425
lcl|c238372_g5_i2|m.24429
lcl|c238378_g1_i1|m.24441
lcl|c238385_g2_i1|m.24454
lcl|c238409_g2_i5|m.24505
lcl|c238476_g3_i5|m.24565
lcl|c238537_g2_i7|m.24631
lcl|c176627_g1_i2|m.576
lcl|c211660_g1_i1|m.2486
lcl|c238560_g5_i2|m.24666
lcl|c238572_g3_i3|m.24677
lcl|c238581_g1_i1|m.24692
lcl|c238657_g1_i1|m.24764
lcl|c238662_g3_i1|m.24774
lcl|c238663_g1_i2|m.24780
lcl|c238664_g1_i2|m.24781
lcl|c238677_g1_i1|m.24810
lcl|c238733_g2_i2|m.24867
lcl|c238738_g2_i3|m.24871
lcl|c238756_g1_i5|m.24891
lcl|c238756_g1_i5|m.24892
lcl|c238814_g3_i2|m.24928
lcl|c238826_g2_i1|m.24957
lcl|c238833_g1_i2|m.24965
lcl|c238858_g2_i1|m.25014
lcl|c211774_g2_i1|m.2538
lcl|c238903_g3_i2|m.25053
lcl|c239007_g1_i1|m.25175
lcl|c239132_g4_i1|m.25330
lcl|c239139_g1_i2|m.25341
lcl|c239139_g1_i7|m.25343
lcl|c239269_g3_i1|m.25540
lcl|c239272_g3_i1|m.25542
lcl|c211861_g1_i1|m.2554
lcl|c239275_g1_i1|m.25549
lcl|c239343_g4_i4|m.25612
lcl|c239381_g2_i1|m.25706
lcl|c239392_g1_i1|m.25726
lcl|c239406_g1_i2|m.25742
lcl|c239409_g1_i2|m.25747
lcl|c239444_g1_i9|m.25795
lcl|c239464_g2_i1|m.25827
lcl|c211914_g5_i4|m.2567
lcl|c239496_g4_i3|m.25878
lcl|c239561_g1_i2|m.25969
lcl|c239610_g1_i3|m.26053
lcl|c239652_g2_i1|m.26096
lcl|c239662_g2_i17|m.26116
lcl|c239670_g2_i1|m.26141
lcl|c239673_g1_i3|m.26150
lcl|c212015_g2_i1|m.2602
lcl|c239684_g3_i6|m.26167
lcl|c239719_g1_i1|m.26241
lcl|c239813_g5_i1|m.26346
lcl|c239883_g8_i2|m.26469
lcl|c239887_g1_i1|m.26471
lcl|c239893_g3_i11|m.26489
lcl|c239893_g3_i11|m.26493
lcl|c239894_g3_i2|m.26508
lcl|c239908_g1_i5|m.26518
lcl|c239962_g2_i3|m.26573
lcl|c212026_g3_i1|m.2608
lcl|c239963_g4_i3|m.26575
lcl|c240014_g2_i1|m.26649
lcl|c240053_g2_i1|m.26700
lcl|c240104_g7_i1|m.26774
lcl|c240121_g3_i1|m.26818
lcl|c240175_g3_i1|m.26871
lcl|c240190_g1_i1|m.26888
lcl|c240251_g4_i1|m.26961
lcl|c240254_g2_i3|m.26966
lcl|c212126_g1_i2|m.2626
lcl|c240274_g5_i1|m.26994
lcl|c240300_g3_i7|m.27053
lcl|c240300_g3_i7|m.27054
lcl|c240327_g5_i1|m.27085
lcl|c240357_g2_i2|m.27113
lcl|c240403_g1_i1|m.27200
lcl|c240440_g6_i6|m.27259
lcl|c240453_g2_i2|m.27266
lcl|c240476_g1_i3|m.27281
lcl|c240483_g2_i2|m.27308
lcl|c240488_g1_i6|m.27324
lcl|c240532_g3_i2|m.27393
lcl|c240624_g3_i1|m.27496
lcl|c240628_g3_i3|m.27511
lcl|c240630_g1_i1|m.27515
lcl|c240640_g2_i1|m.27531
lcl|c240688_g3_i1|m.27609
lcl|c240709_g1_i1|m.27629
lcl|c240739_g2_i5|m.27680
lcl|c212237_g2_i1|m.2659
lcl|c240749_g2_i2|m.27696
lcl|c240761_g2_i10|m.27710
lcl|c240794_g1_i2|m.27749
lcl|c240794_g1_i3|m.27750
lcl|c240833_g3_i3|m.27779
lcl|c240857_g5_i1|m.27819
lcl|c240877_g2_i2|m.27858
lcl|c240904_g2_i1|m.27923
lcl|c240989_g2_i1|m.28022
lcl|c241031_g1_i1|m.28098
lcl|c176630_g1_i1|m.578
lcl|c241090_g1_i1|m.28152
lcl|c241114_g1_i2|m.28195
lcl|c241148_g1_i6|m.28240
lcl|c241194_g4_i1|m.28300
lcl|c241220_g4_i2|m.28322
lcl|c241222_g2_i5|m.28326
lcl|c241251_g1_i1|m.28362
lcl|c212462_g1_i1|m.2727
lcl|c241286_g1_i3|m.28381
lcl|c241299_g1_i6|m.28386
lcl|c241317_g4_i4|m.28427
lcl|c241349_g1_i1|m.28471
lcl|c241359_g3_i12|m.28482
lcl|c241389_g1_i2|m.28515
lcl|c241409_g1_i4|m.28539
lcl|c212602_g3_i5|m.2781
lcl|c241444_g1_i2|m.28576
lcl|c241466_g2_i10|m.28615
lcl|c241498_g6_i2|m.28662
lcl|c241500_g1_i1|m.28663
lcl|c241502_g2_i1|m.28666
lcl|c241516_g1_i3|m.28672
lcl|c241579_g2_i1|m.28728
lcl|c241579_g2_i3|m.28729
lcl|c241608_g1_i1|m.28761
lcl|c212652_g1_i3|m.2790
lcl|c241630_g2_i5|m.28790
lcl|c241649_g4_i1|m.28823
lcl|c241650_g2_i3|m.28825
lcl|c241650_g2_i3|m.28826
lcl|c241754_g2_i1|m.28913
lcl|c241824_g2_i8|m.28976
lcl|c241854_g3_i2|m.29002
lcl|c241873_g2_i3|m.29039
lcl|c212693_g1_i1|m.2804
lcl|c241909_g1_i6|m.29130
lcl|c241909_g2_i2|m.29132
lcl|c241909_g2_i3|m.29133
lcl|c241916_g1_i1|m.29146
lcl|c241966_g1_i1|m.29199
lcl|c242001_g1_i2|m.29236
lcl|c242066_g1_i1|m.29327
lcl|c212713_g4_i1|m.2814
lcl|c242089_g1_i1|m.29373
lcl|c242092_g2_i3|m.29375
lcl|c242139_g4_i2|m.29446
lcl|c242185_g2_i2|m.29491
lcl|c242193_g2_i1|m.29501
lcl|c242257_g2_i2|m.29551
lcl|c242277_g7_i2|m.29564
lcl|c242362_g2_i1|m.29700
lcl|c212727_g5_i1|m.2822
lcl|c242373_g3_i2|m.29725
lcl|c242381_g1_i1|m.29746
lcl|c242419_g1_i1|m.29781
lcl|c242463_g1_i3|m.29817
lcl|c242499_g1_i3|m.29884
lcl|c242511_g4_i7|m.29892
lcl|c242527_g2_i1|m.29909
lcl|c242541_g2_i5|m.29922
lcl|c242581_g1_i1|m.29984
lcl|c242594_g2_i1|m.30002
lcl|c242618_g2_i3|m.30039
lcl|c242618_g2_i5|m.30041
lcl|c242644_g1_i1|m.30082
lcl|c242717_g1_i3|m.30173
lcl|c242743_g1_i1|m.30188
lcl|c242793_g1_i1|m.30226
lcl|c242793_g1_i1|m.30227
lcl|c242803_g1_i3|m.30250
lcl|c242839_g1_i1|m.30267
lcl|c212821_g1_i2|m.2859
lcl|c242839_g1_i1|m.30268
lcl|c242855_g1_i2|m.30293
lcl|c242878_g1_i4|m.30326
lcl|c242885_g1_i1|m.30332
lcl|c242894_g3_i1|m.30343
lcl|c242902_g2_i1|m.30362
lcl|c242924_g1_i1|m.30399
lcl|c242974_g2_i1|m.30459
lcl|c212826_g3_i1|m.2861
lcl|c243004_g1_i1|m.30509
lcl|c243010_g3_i1|m.30515
lcl|c243015_g1_i1|m.30516
lcl|c243045_g1_i1|m.30553
lcl|c243085_g1_i3|m.30591
lcl|c243086_g4_i2|m.30593
lcl|c243097_g5_i3|m.30604
lcl|c243112_g2_i2|m.30632
lcl|c243117_g1_i1|m.30639
lcl|c179773_g1_i1|m.636
lcl|c212912_g1_i1|m.2890
lcl|c243149_g1_i2|m.30670
lcl|c243154_g1_i1|m.30688
lcl|c243228_g1_i1|m.30729
lcl|c243308_g5_i1|m.30798
lcl|c243349_g1_i4|m.30872
lcl|c243371_g1_i1|m.30909
lcl|c243397_g1_i1|m.30938
lcl|c243429_g2_i2|m.30976
lcl|c212937_g3_i2|m.2900
lcl|c243503_g5_i1|m.31038
lcl|c243506_g1_i6|m.31041
lcl|c243516_g2_i1|m.31047
lcl|c243541_g3_i2|m.31058
lcl|c243554_g1_i5|m.31071
lcl|c243578_g4_i1|m.31087
lcl|c243614_g4_i2|m.31123
lcl|c243628_g3_i2|m.31151
lcl|c243633_g2_i1|m.31165
lcl|c243633_g2_i1|m.31166
lcl|c243654_g1_i2|m.31195
lcl|c243654_g1_i2|m.31196
lcl|c243671_g5_i1|m.31222
lcl|c243673_g1_i1|m.31225
lcl|c243724_g1_i1|m.31250
lcl|c243765_g1_i1|m.31282
lcl|c243774_g1_i2|m.31291
lcl|c243791_g1_i1|m.31323
lcl|c213022_g4_i5|m.2921
lcl|c243799_g1_i1|m.31328
lcl|c243884_g3_i1|m.31457
lcl|c243893_g1_i1|m.31474
lcl|c243909_g1_i1|m.31505
lcl|c243935_g1_i3|m.31546
lcl|c243938_g2_i1|m.31548
lcl|c243954_g3_i1|m.31569
lcl|c213072_g1_i1|m.2941
lcl|c244055_g1_i3|m.31694
lcl|c244083_g1_i1|m.31720
lcl|c244084_g2_i1|m.31724
lcl|c244126_g1_i2|m.31771
lcl|c244145_g1_i1|m.31801
lcl|c244164_g1_i1|m.31837
lcl|c244169_g2_i1|m.31846
lcl|c244173_g1_i4|m.31852
lcl|c244176_g3_i1|m.31854
lcl|c213117_g1_i3|m.2966
lcl|c244197_g2_i1|m.31877
lcl|c244235_g1_i2|m.31919
lcl|c244249_g2_i1|m.31932
lcl|c244255_g3_i1|m.31943
lcl|c244264_g3_i1|m.31952
lcl|c244278_g1_i1|m.31973
lcl|c213147_g4_i1|m.2980
lcl|c244315_g1_i2|m.32024
lcl|c244350_g3_i3|m.32077
lcl|c244363_g1_i1|m.32089
lcl|c244364_g1_i1|m.32091
lcl|c244396_g1_i1|m.32137
lcl|c244407_g1_i3|m.32143
lcl|c244439_g1_i1|m.32192
lcl|c213160_g2_i5|m.2982
lcl|c244452_g2_i2|m.32209
lcl|c244474_g3_i1|m.32253
lcl|c244484_g2_i1|m.32270
lcl|c244488_g3_i1|m.32282
lcl|c244489_g1_i1|m.32283
lcl|c244503_g2_i1|m.32303
lcl|c244508_g1_i1|m.32310
lcl|c272541_g1_i1|m.32419
lcl|c65293_g1_i1|m.32646
lcl|c81884_g1_i1|m.32679
lcl|c213262_g2_i4|m.3006
lcl|c89067_g1_i1|m.32704
lcl|c185981_g1_i2|m.719
lcl|c195747_g2_i1|m.945
lcl|c243887_g1_i1|m.31460
lcl|c201441_g1_i1|m.1204
lcl|c202129_g1_i1|m.1242
lcl|c213278_g3_i2|m.3010
lcl|c202472_g1_i1|m.1259
lcl|c202894_g5_i1|m.1285
lcl|c203483_g1_i2|m.1328
lcl|c204986_g3_i2|m.1414
lcl|c206427_g2_i4|m.1541
lcl|c206859_g1_i1|m.1600
lcl|c236885_g1_i5|m.22663
lcl|c236885_g1_i7|m.22665
lcl|c236885_g1_i3|m.22659
lcl|c207332_g2_i2|m.1633
lcl|c182463_g1_i1|m.663
lcl|c213306_g2_i1|m.3016
lcl|c208130_g1_i1|m.1735
lcl|c208140_g2_i1|m.1739
lcl|c209131_g1_i2|m.1905
lcl|c209570_g1_i3|m.2003
lcl|c210031_g1_i2|m.2100
lcl|c210253_g1_i2|m.2149
lcl|c243393_g3_i1|m.30930
lcl|c223677_g1_i1|m.9303
lcl|c224624_g4_i1|m.10025
lcl|c224624_g2_i1|m.10023
lcl|c235513_g2_i1|m.20994
lcl|c222682_g3_i7|m.8525
lcl|c229067_g1_i6|m.13938
lcl|c235115_g6_i1|m.20588
lcl|c244515_g4_i1|m.32348
lcl|c231210_g4_i4|m.16042
lcl|c219953_g4_i1|m.6659
lcl|c220204_g2_i2|m.6810
lcl|c222854_g1_i1|m.8663
lcl|c214584_g4_i1|m.3540
lcl|c220736_g3_i1|m.7111
lcl|c233257_g5_i1|m.18320
lcl|c229067_g1_i3|m.13935
lcl|c226414_g7_i1|m.11461
lcl|c210423_g1_i5|m.2178
lcl|c210724_g2_i1|m.2253
lcl|c244023_g1_i1|m.31634
lcl|c213355_g3_i1|m.3053
lcl|c211001_g1_i6|m.2326
lcl|c211022_g1_i7|m.2328
lcl|c212784_g2_i1|m.2837
lcl|c212839_g1_i3|m.2877
lcl|c213311_g2_i3|m.3020
lcl|c213314_g8_i4|m.3021
lcl|c213496_g2_i3|m.3109
lcl|c213576_g12_i2|m.3138
lcl|c213677_g1_i4|m.3168
lcl|c213837_g2_i3|m.3220
lcl|c213419_g4_i1|m.3080
lcl|c213886_g7_i2|m.3271
lcl|c214164_g1_i8|m.3381
lcl|c214228_g4_i6|m.3409
lcl|c214229_g1_i1|m.3410
lcl|c214242_g1_i2|m.3413
lcl|c213143_g1_i2|m.2979
lcl|c214356_g7_i5|m.3463
lcl|c214397_g6_i4|m.3476
lcl|c214499_g2_i2|m.3512
lcl|c214530_g4_i1|m.3518
lcl|c214830_g3_i4|m.3696
lcl|c214915_g6_i2|m.3733
lcl|c215450_g1_i1|m.4033
lcl|c215492_g2_i9|m.4058
lcl|c215553_g1_i10|m.4084
lcl|c213534_g3_i4|m.3118
lcl|c215761_g1_i1|m.4176
lcl|c215763_g2_i3|m.4184
lcl|c215894_g1_i3|m.4266
lcl|c215953_g5_i6|m.4317
lcl|c215963_g8_i2|m.4326
lcl|c216038_g5_i1|m.4365
lcl|c216057_g3_i1|m.4371
lcl|c216057_g3_i4|m.4374
lcl|c216124_g1_i3|m.4406
lcl|c216129_g1_i2|m.4409
lcl|c213742_g1_i10|m.3190
lcl|c216163_g1_i3|m.4416
lcl|c216367_g2_i7|m.4555
lcl|c216377_g1_i3|m.4559
lcl|c216500_g6_i5|m.4616
lcl|c216645_g1_i1|m.4691
lcl|c216705_g1_i4|m.4732
lcl|c216786_g2_i4|m.4765
lcl|c217013_g4_i3|m.4901
lcl|c217098_g2_i2|m.4966
lcl|c213743_g5_i1|m.3191
lcl|c217182_g4_i3|m.5021
lcl|c217182_g4_i2|m.5020
lcl|c217341_g1_i2|m.5116
lcl|c217405_g1_i6|m.5180
lcl|c217427_g4_i1|m.5185
lcl|c217466_g1_i3|m.5215
lcl|c230117_g1_i3|m.14970
lcl|c217585_g1_i2|m.5268
lcl|c213826_g1_i1|m.3216
lcl|c217816_g7_i5|m.5372
lcl|c217854_g5_i6|m.5415
lcl|c217988_g6_i3|m.5463
lcl|c218196_g3_i9|m.5616
lcl|c218214_g1_i2|m.5634
lcl|c218357_g3_i2|m.5741
lcl|c218374_g1_i3|m.5753
lcl|c218647_g3_i1|m.5884
lcl|c218730_g2_i11|m.5922
lcl|c218844_g4_i7|m.5991
lcl|c213850_g3_i2|m.3229
lcl|c218881_g3_i2|m.6022
lcl|c218968_g13_i5|m.6107
lcl|c219237_g2_i4|m.6297
lcl|c219327_g1_i2|m.6330
lcl|c219462_g5_i7|m.6389
lcl|c219473_g3_i1|m.6396
lcl|c219495_g3_i10|m.6406
lcl|c219546_g2_i1|m.6439
lcl|c219556_g4_i5|m.6447
lcl|c219662_g1_i2|m.6507
lcl|c219710_g2_i1|m.6538
lcl|c214653_g2_i1|m.3571
lcl|c219733_g1_i5|m.6547
lcl|c219829_g2_i1|m.6600
lcl|c219883_g1_i2|m.6624
lcl|c220306_g1_i5|m.6860
lcl|c220360_g1_i5|m.6901
lcl|c220464_g2_i2|m.6955
lcl|c220629_g1_i1|m.7036
lcl|c183284_g1_i1|m.675
lcl|c213888_g2_i1|m.3274
lcl|c220633_g2_i2|m.7049
lcl|c220640_g5_i2|m.7065
lcl|c220657_g1_i4|m.7075
lcl|c220657_g1_i5|m.7076
lcl|c220808_g2_i6|m.7171
lcl|c220897_g5_i4|m.7224
lcl|c220945_g4_i2|m.7256
lcl|c220947_g2_i1|m.7263
lcl|c220977_g2_i3|m.7288
lcl|c221039_g1_i2|m.7339
lcl|c221054_g2_i5|m.7352
lcl|c213946_g11_i4|m.3301
lcl|c221077_g4_i2|m.7375
lcl|c221101_g1_i4|m.7399
lcl|c221225_g1_i6|m.7493
lcl|c221281_g1_i1|m.7531
lcl|c221356_g3_i2|m.7588
lcl|c221374_g4_i3|m.7595
lcl|c221440_g2_i5|m.7632
lcl|c221441_g1_i5|m.7633
lcl|c221482_g1_i3|m.7664
lcl|c214028_g2_i1|m.3329
lcl|c221497_g1_i2|m.7677
lcl|c221524_g4_i2|m.7708
lcl|c221524_g4_i1|m.7707
lcl|c221583_g3_i2|m.7741
lcl|c221608_g1_i1|m.7755
lcl|c221672_g4_i6|m.7784
lcl|c221676_g4_i4|m.7786
lcl|c225423_g3_i2|m.10600
lcl|c227927_g4_i1|m.12894
lcl|c228653_g2_i5|m.13498
lcl|c221802_g2_i1|m.7868
lcl|c226454_g2_i2|m.11493
lcl|c242662_g1_i1|m.30100
lcl|c217326_g3_i1|m.5105
lcl|c221883_g2_i12|m.7953
lcl|c222140_g4_i1|m.8123
lcl|c222155_g2_i2|m.8140
lcl|c214032_g1_i4|m.3331
lcl|c222208_g5_i7|m.8170
lcl|c222225_g1_i1|m.8189
lcl|c222306_g9_i1|m.8237
lcl|c222339_g3_i2|m.8253
lcl|c222399_g1_i2|m.8304
lcl|c244474_g2_i1|m.32252
lcl|c224694_g1_i1|m.10068
lcl|c222419_g1_i6|m.8316
lcl|c222437_g1_i2|m.8353
lcl|c222451_g1_i1|m.8369
lcl|c214108_g4_i4|m.3369
lcl|c222459_g5_i1|m.8379
lcl|c222639_g5_i2|m.8480
lcl|c222667_g10_i4|m.8510
lcl|c222694_g7_i2|m.8539
lcl|c222899_g2_i4|m.8691
lcl|c222946_g2_i3|m.8728
lcl|c220806_g2_i3|m.7164
lcl|c214189_g1_i1|m.3388
lcl|c222950_g5_i5|m.8734
lcl|c222960_g2_i1|m.8750
lcl|c214118_g1_i2|m.3372
lcl|c223053_g2_i3|m.8836
lcl|c223098_g6_i3|m.8878
lcl|c223162_g2_i6|m.8914
lcl|c223274_g3_i3|m.8991
lcl|c223277_g3_i4|m.8995
lcl|c223345_g3_i1|m.9044
lcl|c223355_g1_i3|m.9051
lcl|c214211_g3_i3|m.3396
lcl|c223365_g2_i2|m.9063
lcl|c223378_g2_i2|m.9075
lcl|c223414_g3_i3|m.9104
lcl|c223454_g1_i3|m.9139
lcl|c215384_g1_i4|m.3995
lcl|c223499_g2_i8|m.9175
lcl|c223499_g2_i6|m.9173
lcl|c223556_g1_i6|m.9203
lcl|c223608_g1_i1|m.9238
lcl|c223611_g2_i2|m.9249
lcl|c223629_g2_i1|m.9258
lcl|c223629_g2_i2|m.9260
lcl|c223654_g2_i3|m.9281
lcl|c223673_g2_i1|m.9297
lcl|c223761_g4_i7|m.9360
lcl|c223761_g4_i10|m.9352
lcl|c223794_g7_i1|m.9389
lcl|c223808_g2_i1|m.9405
lcl|c223865_g4_i2|m.9445
lcl|c223901_g5_i2|m.9467
lcl|c223941_g1_i2|m.9485
lcl|c221840_g3_i2|m.7908
lcl|c221840_g3_i5|m.7911
lcl|c224714_g2_i1|m.10079
lcl|c224029_g4_i1|m.9563
lcl|c224057_g7_i5|m.9575
lcl|c224226_g3_i4|m.9666
lcl|c224257_g2_i4|m.9682
lcl|c224260_g2_i3|m.9686
lcl|c224263_g3_i3|m.9691
lcl|c224312_g2_i3|m.9718
lcl|c203039_g1_i1|m.1291
lcl|c224498_g4_i2|m.9859
lcl|c224541_g6_i2|m.9899
lcl|c214452_g3_i2|m.3499
lcl|c224583_g1_i1|m.9971
lcl|c224713_g2_i1|m.10075
lcl|c224811_g1_i3|m.10150
lcl|c224835_g5_i2|m.10167
lcl|c224848_g3_i5|m.10172
lcl|c224890_g1_i1|m.10217
lcl|c224995_g6_i2|m.10289
lcl|c225112_g3_i3|m.10371
lcl|c187253_g2_i1|m.744
lcl|c214539_g3_i1|m.3522
lcl|c225115_g3_i4|m.10375
lcl|c225132_g1_i3|m.10387
lcl|c225136_g5_i9|m.10397
lcl|c225156_g8_i5|m.10409
lcl|c225214_g2_i5|m.10448
lcl|c225222_g1_i4|m.10453
lcl|c225236_g1_i2|m.10460
lcl|c225245_g1_i2|m.10472
lcl|c225328_g5_i5|m.10528
lcl|c225457_g2_i2|m.10643
lcl|c214559_g9_i1|m.3528
lcl|c225471_g2_i2|m.10654
lcl|c225478_g2_i1|m.10667
lcl|c225710_g7_i3|m.10847
lcl|c225747_g4_i1|m.10900
lcl|c225753_g2_i5|m.10911
lcl|c223432_g3_i1|m.9111
lcl|c225756_g1_i2|m.10914
lcl|c225775_g7_i7|m.10937
lcl|c225789_g4_i1|m.10946
lcl|c225859_g2_i6|m.10997
lcl|c226009_g3_i5|m.11131
lcl|c214573_g3_i1|m.3534
lcl|c226079_g3_i1|m.11186
lcl|c226079_g3_i2|m.11188
lcl|c226146_g2_i7|m.11244
lcl|c226156_g7_i2|m.11251
lcl|c226546_g3_i1|m.11574
lcl|c244485_g3_i2|m.32271
lcl|c226613_g4_i3|m.11623
lcl|c226629_g1_i3|m.11641
lcl|c226631_g6_i18|m.11657
lcl|c214602_g8_i1|m.3549
lcl|c226715_g5_i2|m.11728
lcl|c226739_g4_i2|m.11743
lcl|c226769_g3_i1|m.11767
lcl|c210478_g1_i4|m.2192
lcl|c226933_g1_i6|m.11949
lcl|c226971_g4_i9|m.11985
lcl|c226978_g9_i3|m.11996
lcl|c227069_g2_i12|m.12102
lcl|c227080_g2_i3|m.12113
lcl|c227108_g1_i3|m.12161
lcl|c227129_g2_i15|m.12185
lcl|c227180_g1_i4|m.12217
lcl|c227188_g1_i3|m.12224
lcl|c227206_g2_i7|m.12247
lcl|c227332_g2_i2|m.12341
lcl|c227537_g2_i4|m.12549
lcl|c227562_g6_i1|m.12582
lcl|c227564_g2_i6|m.12586
lcl|c214656_g8_i1|m.3574
lcl|c227758_g2_i4|m.12736
lcl|c227762_g5_i1|m.12740
lcl|c227780_g2_i3|m.12767
lcl|c227804_g2_i3|m.12774
lcl|c227856_g7_i5|m.12838
lcl|c227887_g3_i2|m.12871
lcl|c227910_g4_i10|m.12878
lcl|c227928_g1_i2|m.12896
lcl|c227928_g3_i7|m.12901
lcl|c227939_g2_i2|m.12910
lcl|c227958_g2_i1|m.12924
lcl|c227993_g1_i6|m.12952
lcl|c228113_g1_i1|m.13052
lcl|c228221_g2_i9|m.13137
lcl|c228244_g5_i1|m.13157
lcl|c228245_g4_i3|m.13160
lcl|c228256_g1_i10|m.13166
lcl|c228300_g4_i1|m.13216
lcl|c228309_g1_i6|m.13221
lcl|c214691_g1_i1|m.3614
lcl|c228453_g2_i2|m.13342
lcl|c228525_g4_i3|m.13399
lcl|c228543_g5_i2|m.13413
lcl|c228577_g3_i1|m.13439
lcl|c228608_g2_i2|m.13456
lcl|c228666_g1_i2|m.13507
lcl|c228678_g2_i11|m.13512
lcl|c228700_g2_i5|m.13572
lcl|c228700_g2_i1|m.13568
lcl|c214720_g1_i1|m.3639
lcl|c228728_g1_i4|m.13597
lcl|c228746_g3_i3|m.13615
lcl|c228746_g2_i5|m.13610
lcl|c228772_g4_i5|m.13636
lcl|c228794_g3_i8|m.13650
lcl|c228830_g2_i1|m.13692
lcl|c228994_g6_i1|m.13852
lcl|c229012_g1_i8|m.13875
lcl|c229056_g1_i4|m.13924
lcl|c229060_g1_i1|m.13927
lcl|c214720_g2_i1|m.3640
lcl|c229073_g2_i1|m.13946
lcl|c229089_g2_i5|m.13955
lcl|c229110_g2_i1|m.13970
lcl|c229132_g1_i2|m.13984
lcl|c229134_g1_i1|m.13988
lcl|c229184_g1_i1|m.14022
lcl|c229340_g1_i1|m.14173
lcl|c229342_g3_i1|m.14174
lcl|c229362_g2_i10|m.14209
lcl|c187971_g1_i1|m.759
lcl|c229503_g1_i3|m.14339
lcl|c229507_g2_i4|m.14343
lcl|c229561_g1_i12|m.14408
lcl|c229615_g3_i4|m.14451
lcl|c229670_g1_i2|m.14513
lcl|c229692_g2_i9|m.14545
lcl|c229751_g1_i2|m.14592
lcl|c229768_g1_i6|m.14605
lcl|c214832_g3_i2|m.3697
lcl|c229808_g4_i2|m.14641
lcl|c229880_g4_i1|m.14717
lcl|c229886_g1_i6|m.14730
lcl|c229886_g1_i5|m.14728
lcl|c229886_g1_i1|m.14723
lcl|c230011_g2_i5|m.14861
lcl|c230039_g1_i2|m.14881
lcl|c230054_g1_i7|m.14897
lcl|c230102_g4_i1|m.14957
lcl|c214891_g1_i1|m.3715
lcl|c230124_g3_i6|m.14973
lcl|c230150_g4_i2|m.14989
lcl|c230186_g5_i1|m.15032
lcl|c230220_g1_i2|m.15064
lcl|c230276_g3_i1|m.15112
lcl|c230360_g10_i5|m.15205
lcl|c230398_g2_i4|m.15241
lcl|c230398_g2_i8|m.15247
lcl|c231380_g1_i2|m.16168
lcl|c230405_g2_i9|m.15259
lcl|c230413_g1_i5|m.15274
lcl|c230419_g4_i4|m.15280
lcl|c214925_g1_i1|m.3737
lcl|c230431_g5_i1|m.15286
lcl|c230434_g3_i8|m.15304
lcl|c230438_g3_i4|m.15312
lcl|c230481_g5_i1|m.15356
lcl|c230636_g2_i1|m.15503
lcl|c230792_g1_i1|m.15630
lcl|c230823_g3_i1|m.15672
lcl|c230829_g2_i5|m.15683
lcl|c230880_g3_i5|m.15737
lcl|c230953_g1_i2|m.15824
lcl|c231030_g9_i2|m.15907
lcl|c231043_g3_i4|m.15925
lcl|c231142_g1_i4|m.15993
lcl|c215957_g2_i7|m.4321
lcl|c231190_g4_i3|m.16030
lcl|c231190_g4_i6|m.16031
lcl|c231257_g1_i5|m.16082
lcl|c231285_g1_i2|m.16098
lcl|c231326_g2_i1|m.16129
lcl|c231339_g4_i2|m.16143
lcl|c214971_g6_i7|m.3760
lcl|c231352_g2_i1|m.16156
lcl|c231382_g2_i7|m.16188
lcl|c231430_g2_i6|m.16242
lcl|c231430_g2_i12|m.16236
lcl|c231440_g4_i2|m.16256
lcl|c231469_g3_i4|m.16290
lcl|c231477_g1_i1|m.16301
lcl|c231506_g1_i1|m.16344
lcl|c231559_g1_i5|m.16408
lcl|c231575_g5_i2|m.16426
lcl|c231634_g1_i2|m.16472
lcl|c214975_g3_i2|m.3761
lcl|c231859_g5_i5|m.16713
lcl|c238311_g1_i2|m.24377
lcl|c221076_g3_i4|m.7373
lcl|c221146_g4_i1|m.7411
lcl|c231864_g5_i1|m.16720
lcl|c231896_g2_i12|m.16763
lcl|c231963_g1_i7|m.16837
lcl|c231982_g2_i3|m.16868
lcl|c232046_g3_i8|m.16952
lcl|c232109_g7_i6|m.17002
lcl|c232116_g4_i2|m.17015
lcl|c232149_g3_i2|m.17053
lcl|c232249_g2_i1|m.17180
lcl|c215059_g3_i1|m.3798
lcl|c232274_g1_i4|m.17210
lcl|c232369_g2_i7|m.17306
lcl|c232426_g1_i1|m.17360
lcl|c232520_g2_i5|m.17456
lcl|c232532_g2_i4|m.17479
lcl|c232559_g1_i3|m.17522
lcl|c232628_g4_i3|m.17621
lcl|c232660_g2_i7|m.17650
lcl|c232758_g3_i1|m.17745
lcl|c232758_g3_i3|m.17747
lcl|c215093_g1_i2|m.3818
lcl|c232843_g1_i4|m.17830
lcl|c226607_g5_i2|m.11621
lcl|c232931_g1_i10|m.17922
lcl|c233011_g1_i2|m.18023
lcl|c233012_g3_i3|m.18031
lcl|c233024_g1_i6|m.18051
lcl|c233026_g1_i2|m.18055
lcl|c233030_g2_i3|m.18059
lcl|c233040_g3_i1|m.18068
lcl|c233048_g1_i8|m.18077
lcl|c215258_g3_i5|m.3905
lcl|c233068_g3_i4|m.18107
lcl|c233068_g3_i2|m.18104
lcl|c211676_g2_i1|m.2488
lcl|c211676_g2_i2|m.2489
lcl|c233088_g8_i4|m.18128
lcl|c233103_g2_i1|m.18143
lcl|c233130_g1_i1|m.18171
lcl|c233215_g1_i5|m.18281
lcl|c233306_g1_i2|m.18390
lcl|c233334_g2_i12|m.18425
lcl|c233334_g2_i17|m.18426
lcl|c188047_g2_i2|m.760
lcl|c215279_g2_i6|m.3910
lcl|c233342_g3_i7|m.18440
lcl|c233377_g4_i3|m.18471
lcl|c233384_g5_i1|m.18475
lcl|c233495_g1_i1|m.18614
lcl|c233557_g1_i1|m.18714
lcl|c233661_g2_i3|m.18841
lcl|c233767_g1_i3|m.18989
lcl|c233774_g10_i4|m.19004
lcl|c233774_g10_i1|m.19002
lcl|c233784_g1_i2|m.19012
lcl|c215299_g2_i2|m.3927
lcl|c233817_g1_i1|m.19030
lcl|c233905_g2_i1|m.19151
lcl|c233922_g1_i2|m.19174
lcl|c228945_g3_i2|m.13809
lcl|c233948_g1_i2|m.19238
lcl|c233953_g2_i7|m.19245
lcl|c234080_g1_i1|m.19410
lcl|c234082_g2_i6|m.19416
lcl|c215313_g3_i2|m.3930
lcl|c234108_g1_i5|m.19456
lcl|c234114_g3_i3|m.19475
lcl|c234120_g6_i1|m.19489
lcl|c234135_g3_i2|m.19525
lcl|c234177_g2_i1|m.19581
lcl|c234222_g6_i3|m.19630
lcl|c234421_g4_i7|m.19822
lcl|c234442_g1_i3|m.19849
lcl|c234487_g2_i3|m.19886
lcl|c215316_g1_i1|m.3942
lcl|c234533_g4_i3|m.19947
lcl|c234544_g3_i6|m.19962
lcl|c234579_g2_i6|m.20008
lcl|c234620_g1_i3|m.20041
lcl|c234626_g4_i3|m.20042
lcl|c229538_g7_i4|m.14373
lcl|c234643_g1_i12|m.20068
lcl|c234643_g1_i1|m.20065
lcl|c234643_g1_i2|m.20073
lcl|c234643_g1_i7|m.20081
lcl|c234643_g1_i6|m.20078
lcl|c234655_g3_i2|m.20090
lcl|c234687_g2_i2|m.20139
lcl|c234783_g2_i5|m.20249
lcl|c215397_g1_i1|m.4004
lcl|c234833_g2_i3|m.20312
lcl|c234833_g2_i1|m.20306
lcl|c234838_g1_i12|m.20324
lcl|c234851_g1_i2|m.20336
lcl|c234869_g3_i5|m.20367
lcl|c234883_g2_i2|m.20378
lcl|c234883_g2_i9|m.20380
lcl|c234898_g1_i3|m.20394
lcl|c234912_g2_i1|m.20410
lcl|c234955_g3_i8|m.20446
lcl|c235052_g1_i4|m.20524
lcl|c223297_g2_i1|m.9009
lcl|c235089_g1_i3|m.20552
lcl|c229776_g6_i2|m.14612
lcl|c215423_g1_i1|m.4014
lcl|c235253_g1_i1|m.20757
lcl|c235276_g3_i3|m.20780
lcl|c235384_g3_i4|m.20872
lcl|c235446_g2_i1|m.20934
lcl|c235506_g6_i4|m.20981
lcl|c235530_g1_i2|m.21019
lcl|c235548_g1_i1|m.21054
lcl|c235682_g1_i2|m.21209
lcl|c215430_g1_i6|m.4026
lcl|c235710_g2_i3|m.21243
lcl|c235710_g2_i1|m.21242
lcl|c235735_g2_i4|m.21279
lcl|c235877_g4_i2|m.21429
lcl|c236044_g2_i2|m.21614
lcl|c236087_g2_i1|m.21666
lcl|c236114_g1_i1|m.21718
lcl|c236138_g1_i3|m.21749
lcl|c236174_g2_i1|m.21787
lcl|c236195_g2_i4|m.21823
lcl|c236195_g4_i1|m.21828
lcl|c236195_g2_i1|m.21821
lcl|c215434_g3_i1|m.4032
lcl|c236210_g3_i1|m.21846
lcl|c236213_g2_i1|m.21849
lcl|c236234_g4_i10|m.21877
lcl|c236239_g1_i2|m.21882
lcl|c236250_g3_i7|m.21896
lcl|c236256_g2_i1|m.21902
lcl|c236356_g1_i1|m.22029
lcl|c236360_g3_i2|m.22033
lcl|c236444_g1_i2|m.22121
lcl|c215455_g1_i1|m.4036
lcl|c236445_g2_i1|m.22123
lcl|c236445_g2_i3|m.22125
lcl|c236486_g1_i1|m.22162
lcl|c236516_g4_i3|m.22202
lcl|c236683_g3_i1|m.22390
lcl|c236793_g3_i9|m.22532
lcl|c236859_g1_i3|m.22625
lcl|c236867_g1_i1|m.22637
lcl|c236892_g3_i5|m.22669
lcl|c236892_g3_i6|m.22670
lcl|c215465_g1_i1|m.4044
lcl|c236909_g3_i2|m.22685
lcl|c235901_g3_i2|m.21452
lcl|c184118_g1_i1|m.691
lcl|c236955_g1_i6|m.22720
lcl|c237237_g1_i5|m.23062
lcl|c237328_g3_i1|m.23165
lcl|c237535_g3_i3|m.23359
lcl|c215551_g6_i1|m.4083
lcl|c237550_g1_i1|m.23390
lcl|c237576_g2_i7|m.23440
lcl|c237578_g2_i2|m.23441
lcl|c237593_g3_i1|m.23463
lcl|c237593_g3_i5|m.23465
lcl|c237596_g1_i10|m.23471
lcl|c237602_g1_i1|m.23479
lcl|c237609_g2_i1|m.23487
lcl|c237638_g1_i15|m.23528
lcl|c237658_g3_i4|m.23566
lcl|c237658_g3_i3|m.23565
lcl|c215606_g3_i1|m.4107
lcl|c237711_g3_i12|m.23641
lcl|c237732_g2_i2|m.23675
lcl|c237732_g2_i12|m.23671
lcl|c237805_g1_i7|m.23781
lcl|c237814_g2_i3|m.23786
lcl|c237814_g2_i4|m.23787
lcl|c237851_g2_i1|m.23817
lcl|c237883_g5_i1|m.23858
lcl|c237938_g3_i2|m.23906
lcl|c237955_g4_i3|m.23932
lcl|c237982_g4_i2|m.23956
lcl|c215616_g6_i2|m.4120
lcl|c237992_g1_i1|m.23966
lcl|c238005_g1_i2|m.23984
lcl|c238005_g1_i4|m.23993
lcl|c238054_g2_i6|m.24053
lcl|c238111_g1_i1|m.24102
lcl|c238116_g1_i4|m.24117
lcl|c238132_g3_i11|m.24132
lcl|c238132_g3_i10|m.24131
lcl|c238132_g3_i1|m.24130
lcl|c238140_g4_i1|m.24154
lcl|c238150_g1_i3|m.24168
lcl|c238150_g1_i2|m.24167
lcl|c238164_g1_i1|m.24182
lcl|c238296_g3_i2|m.24349
lcl|c238364_g3_i7|m.24424
lcl|c238364_g3_i1|m.24422
lcl|c238381_g2_i2|m.24448
lcl|c238399_g3_i5|m.24485
lcl|c238399_g3_i2|m.24483
lcl|c238399_g3_i3|m.24484
lcl|c238429_g5_i1|m.24515
lcl|c238491_g1_i8|m.24586
lcl|c238537_g2_i6|m.24628
lcl|c229550_g1_i3|m.14393
lcl|c201183_g1_i1|m.1186
lcl|c238647_g1_i1|m.24759
lcl|c238662_g3_i6|m.24778
lcl|c238676_g4_i3|m.24804
lcl|c215636_g1_i1|m.4133
lcl|c238681_g1_i11|m.24819
lcl|c238754_g1_i3|m.24885
lcl|c238843_g5_i10|m.24992
lcl|c238850_g2_i5|m.25002
lcl|c238853_g1_i1|m.25008
lcl|c238912_g1_i4|m.25063
lcl|c238912_g1_i8|m.25068
lcl|c238919_g4_i6|m.25079
lcl|c238920_g1_i5|m.25086
lcl|c238994_g2_i3|m.25167
lcl|c215667_g2_i4|m.4143
lcl|c239047_g3_i2|m.25233
lcl|c239047_g3_i1|m.25231
lcl|c239047_g3_i3|m.25234
lcl|c239125_g3_i2|m.25324
lcl|c239136_g4_i3|m.25338
lcl|c239191_g2_i1|m.25412
lcl|c239216_g2_i7|m.25448
lcl|c239229_g3_i1|m.25467
lcl|c239240_g3_i4|m.25490
lcl|c239261_g1_i11|m.25522
lcl|c239261_g1_i12|m.25525
lcl|c215676_g2_i1|m.4150
lcl|c239281_g1_i1|m.25557
lcl|c239376_g2_i9|m.25696
lcl|c239376_g2_i11|m.25691
lcl|c239376_g2_i8|m.25695
lcl|c239419_g1_i1|m.25763
lcl|c239419_g1_i10|m.25764
lcl|c239424_g1_i7|m.25774
lcl|c239517_g6_i1|m.25917
lcl|c239543_g6_i2|m.25954
lcl|c239546_g1_i2|m.25957
lcl|c239584_g1_i11|m.26009
lcl|c239643_g6_i2|m.26073
lcl|c239662_g2_i17|m.26115
lcl|c239700_g3_i2|m.26207
lcl|c239722_g4_i5|m.26254
lcl|c239763_g2_i3|m.26299
lcl|c239814_g2_i1|m.26347
lcl|c239814_g2_i3|m.26348
lcl|c239816_g8_i1|m.26351
lcl|c239816_g8_i3|m.26354
lcl|c216784_g1_i1|m.4762
lcl|c239835_g2_i1|m.26401
lcl|c239860_g1_i2|m.26443
lcl|c239860_g1_i1|m.26440
lcl|c239860_g1_i4|m.26447
lcl|c218302_g5_i1|m.5709
lcl|c239893_g3_i11|m.26488
lcl|c215778_g6_i2|m.4198
lcl|c239956_g2_i4|m.26561
lcl|c240071_g1_i3|m.26729
lcl|c240071_g1_i5|m.26730
lcl|c240077_g1_i1|m.26736
lcl|c240077_g1_i6|m.26741
lcl|c240077_g1_i9|m.26743
lcl|c240128_g3_i1|m.26827
lcl|c240158_g2_i1|m.26858
lcl|c240245_g2_i2|m.26954
lcl|c240253_g1_i1|m.26963
lcl|c244342_g1_i1|m.32068
lcl|c240259_g4_i3|m.26973
lcl|c240259_g4_i5|m.26974
lcl|c240264_g4_i5|m.26985
lcl|c215819_g3_i2|m.4218
lcl|c240297_g1_i2|m.27045
lcl|c240333_g1_i3|m.27087
lcl|c240370_g1_i1|m.27121
lcl|c240483_g2_i3|m.27310
lcl|c240483_g1_i8|m.27301
lcl|c240483_g1_i4|m.27290
lcl|c240483_g1_i3|m.27286
lcl|c240523_g1_i10|m.27367
lcl|c240612_g3_i13|m.27477
lcl|c240621_g3_i2|m.27488
lcl|c240699_g3_i15|m.27615
lcl|c240711_g1_i2|m.27634
lcl|c141061_g1_i1|m.229
lcl|c192621_g3_i1|m.866
lcl|c215838_g2_i1|m.4235
lcl|c240720_g1_i3|m.27662
lcl|c214670_g8_i2|m.3578
lcl|c206351_g3_i3|m.1527
lcl|c240732_g2_i2|m.27675
lcl|c240787_g1_i1|m.27744
lcl|c240852_g1_i3|m.27810
lcl|c232899_g1_i2|m.17887
lcl|c240887_g1_i1|m.27877
lcl|c240887_g1_i5|m.27881
lcl|c240901_g2_i12|m.27918
lcl|c240948_g3_i3|m.27988
lcl|c241027_g2_i3|m.28090
lcl|c215924_g3_i1|m.4285
lcl|c241105_g3_i1|m.28176
lcl|c241174_g2_i10|m.28286
lcl|c241242_g1_i1|m.28345
lcl|c241252_g2_i5|m.28366
lcl|c241254_g2_i1|m.28367
lcl|c241378_g5_i4|m.28499
lcl|c241687_g2_i1|m.28855
lcl|c241763_g6_i2|m.28918
lcl|c215928_g3_i1|m.4293
lcl|c241792_g2_i3|m.28939
lcl|c241817_g1_i2|m.28964
lcl|c241817_g1_i5|m.28968
lcl|c241874_g1_i11|m.29053
lcl|c241874_g1_i1|m.29043
lcl|c241874_g1_i7|m.29076
lcl|c241874_g1_i1|m.29042
lcl|c241874_g1_i11|m.29054
lcl|c241874_g1_i1|m.29044
lcl|c241900_g1_i2|m.29120
lcl|c241916_g1_i7|m.29148
lcl|c242362_g2_i1|m.29701
lcl|c242487_g1_i2|m.29847
lcl|c215957_g2_i1|m.4319
lcl|c242601_g4_i2|m.30017
lcl|c242633_g1_i1|m.30058
lcl|c242709_g1_i2|m.30167
lcl|c242868_g4_i4|m.30303
lcl|c242872_g1_i1|m.30313
lcl|c243004_g1_i3|m.30514
lcl|c243059_g4_i3|m.30568
lcl|c216188_g2_i2|m.4423
lcl|c243222_g3_i1|m.30722
lcl|c243234_g1_i2|m.30739
lcl|c243269_g3_i1|m.30762
lcl|c243326_g1_i1|m.30823
lcl|c243357_g2_i4|m.30881
lcl|c243493_g3_i2|m.31028
lcl|c243591_g3_i1|m.31105
lcl|c243632_g1_i1|m.31156
lcl|c216194_g2_i1|m.4425
lcl|c243643_g1_i1|m.31175
lcl|c243652_g1_i2|m.31190
lcl|c243813_g3_i2|m.31355
lcl|c244151_g1_i2|m.31813
lcl|c244343_g3_i1|m.32069
lcl|c244353_g1_i1|m.32081
lcl|c318732_g1_i1|m.32501
lcl|c270076_g1_i1|m.32416
lcl|c216201_g2_i1|m.4428
lcl|c129535_g1_i1|m.155
lcl|c214067_g1_i1|m.3351
lcl|c214162_g1_i3|m.3378
lcl|c216289_g7_i1|m.4487
lcl|c216467_g8_i2|m.4597
lcl|c217363_g1_i6|m.5152
lcl|c218183_g4_i3|m.5602
lcl|c219763_g5_i3|m.6564
lcl|c221681_g2_i2|m.7790
lcl|c226094_g1_i1|m.11204
lcl|c226303_g1_i2|m.11380
lcl|c230104_g4_i1|m.14959
lcl|c233474_g3_i1|m.18592
lcl|c234914_g2_i2|m.20413
lcl|c234999_g3_i3|m.20494
lcl|c236008_g9_i2|m.21562
lcl|c236924_g5_i3|m.22694
lcl|c194625_g1_i1|m.911
lcl|c239334_g2_i2|m.25606
lcl|c239660_g2_i2|m.26111
lcl|c239931_g2_i1|m.26539
lcl|c240624_g2_i1|m.27495
lcl|c240911_g1_i2|m.27934
lcl|c241372_g2_i1|m.28491
lcl|c78380_g1_i1|m.32668
lcl|c209938_g3_i4|m.2075
lcl|c213783_g1_i1|m.3203
lcl|c216448_g1_i1|m.4592
lcl|c233603_g4_i1|m.18756
lcl|c241165_g4_i1|m.28268
lcl|c216467_g10_i1|m.4595
lcl|c202155_g1_i3|m.1244
lcl|c216243_g3_i1|m.4453
lcl|c221337_g4_i1|m.7577
lcl|c223254_g1_i1|m.8977
lcl|c216467_g8_i1|m.4596
lcl|c224691_g5_i2|m.10067
lcl|c228679_g8_i1|m.13528
lcl|c228768_g2_i2|m.13633
lcl|c231569_g1_i6|m.16419
lcl|c231762_g2_i11|m.16600
lcl|c216506_g3_i1|m.4617
lcl|c233021_g5_i2|m.18047
lcl|c236422_g1_i1|m.22090
lcl|c236926_g1_i1|m.22696
lcl|c216527_g1_i2|m.4625
lcl|c216539_g3_i3|m.4633
lcl|c230412_g8_i4|m.15270
lcl|c240767_g1_i1|m.27718
lcl|c185883_g1_i2|m.712
lcl|c210652_g1_i2|m.2225
lcl|c216567_g2_i2|m.4643
lcl|c218000_g1_i5|m.5473
lcl|c233848_g8_i1|m.19070
lcl|c235769_g9_i1|m.21325
lcl|c216598_g2_i1|m.4667
lcl|c238743_g1_i2|m.24878
lcl|c240035_g1_i1|m.26689
lcl|c218972_g2_i1|m.6108
lcl|c213912_g1_i5|m.3283
lcl|c195446_g1_i2|m.938
lcl|c216621_g3_i1|m.4676
lcl|c221711_g1_i1|m.7807
lcl|c229093_g1_i2|m.13957
lcl|c216650_g2_i1|m.4697
lcl|c233364_g2_i1|m.18459
lcl|c216655_g1_i1|m.4705
lcl|c226513_g6_i2|m.11548
lcl|c228778_g1_i1|m.13644
lcl|c230610_g4_i3|m.15445
lcl|c231825_g1_i2|m.16652
lcl|c234391_g1_i4|m.19790
lcl|c234626_g5_i4|m.20044
lcl|c216702_g5_i1|m.4730
lcl|c243406_g1_i1|m.30946
lcl|c243675_g4_i3|m.31228
lcl|c222533_g1_i1|m.8412
lcl|c222999_g2_i1|m.8783
lcl|c240246_g6_i1|m.26956
lcl|c216834_g4_i2|m.4800
lcl|c244362_g1_i2|m.32088
lcl|c216848_g3_i4|m.4809
lcl|c223357_g4_i3|m.9060
lcl|c225637_g3_i2|m.10796
lcl|c229898_g2_i1|m.14743
lcl|c234030_g1_i1|m.19351
lcl|c230081_g1_i4|m.14930
lcl|c221844_g2_i1|m.7916
lcl|c228247_g2_i1|m.13162
lcl|c238725_g2_i10|m.24864
lcl|c235430_g2_i10|m.20924
lcl|c236218_g9_i1|m.21856
lcl|c216899_g1_i1|m.4840
lcl|c214652_g2_i1|m.3569
lcl|c218873_g3_i3|m.6014
lcl|c237455_g11_i1|m.23288
lcl|c240578_g4_i1|m.27439
lcl|c198620_g1_i2|m.1049
lcl|c216916_g1_i2|m.4843
lcl|c216930_g11_i2|m.4850
lcl|c240846_g1_i2|m.27805
lcl|c216942_g4_i3|m.4860
lcl|c238153_g1_i1|m.24176
lcl|c236071_g1_i4|m.21642
lcl|c212026_g1_i1|m.2607
lcl|c229166_g4_i2|m.14015
lcl|c232597_g5_i15|m.17582
lcl|c242869_g2_i4|m.30308
lcl|c210995_g1_i1|m.2321
lcl|c222542_g3_i2|m.8415
lcl|c217005_g3_i1|m.4893
lcl|c244084_g2_i1|m.31725
lcl|c220294_g1_i11|m.6858
lcl|c221624_g3_i1|m.7766
lcl|c224375_g5_i1|m.9769
lcl|c217792_g3_i1|m.5367
lcl|c217046_g2_i2|m.4921
lcl|c225646_g2_i10|m.10800
lcl|c240117_g3_i4|m.26812
lcl|c217146_g1_i1|m.4997
lcl|c231768_g1_i1|m.16601
lcl|c35802_g1_i1|m.32567
lcl|c221208_g3_i12|m.7474
lcl|c217195_g5_i2|m.5022
lcl|c243458_g1_i2|m.30995
lcl|c198665_g3_i2|m.1050
lcl|c217198_g5_i5|m.5024
lcl|c217015_g1_i1|m.4906
lcl|c217199_g3_i2|m.5026
lcl|c221244_g1_i4|m.7506
lcl|c217447_g9_i5|m.5205
lcl|c221319_g3_i2|m.7559
lcl|c238002_g8_i1|m.23983
lcl|c244381_g2_i1|m.32105
lcl|c217534_g1_i2|m.5231
lcl|c236109_g5_i1|m.21715
lcl|c186217_g1_i1|m.726
lcl|c217573_g1_i1|m.5252
lcl|c234209_g3_i1|m.19613
lcl|c230044_g4_i2|m.14887
lcl|c243527_g1_i1|m.31049
lcl|c229348_g1_i1|m.14183
lcl|c217654_g5_i4|m.5303
lcl|c242934_g1_i4|m.30427
lcl|c212577_g5_i2|m.2769
lcl|c224166_g2_i1|m.9648
lcl|c229303_g7_i1|m.14137
lcl|c236793_g3_i7|m.22527
lcl|c226091_g2_i2|m.11200
lcl|c199545_g1_i1|m.1080
lcl|c234228_g5_i1|m.19637
lcl|c217737_g4_i4|m.5348
lcl|c217776_g2_i5|m.5358
lcl|c217777_g4_i6|m.5361
lcl|c236504_g2_i4|m.22175
lcl|c240682_g3_i1|m.27598
lcl|c217808_g1_i5|m.5370
lcl|c230982_g4_i7|m.15848
lcl|c217834_g1_i3|m.5399
lcl|c217887_g8_i2|m.5422
lcl|c227467_g2_i2|m.12463
lcl|c217917_g2_i1|m.5431
lcl|c217972_g1_i6|m.5456
lcl|c227952_g2_i1|m.12918
lcl|c204003_g1_i4|m.1363
lcl|c199810_g1_i2|m.1089
lcl|c218032_g1_i1|m.5496
lcl|c213837_g2_i4|m.3221
lcl|c218043_g2_i3|m.5510
lcl|c218119_g1_i3|m.5570
lcl|c218123_g3_i2|m.5572
lcl|c218175_g5_i2|m.5596
lcl|c234172_g3_i1|m.19574
lcl|c216330_g2_i4|m.4540
lcl|c218223_g3_i1|m.5642
lcl|c237342_g3_i11|m.23180
lcl|c218374_g4_i1|m.5754
lcl|c218375_g1_i1|m.5756
lcl|c218445_g1_i1|m.5788
lcl|c201141_g1_i1|m.1178
lcl|c218481_g4_i6|m.5811
lcl|c218494_g2_i5|m.5814
lcl|c218495_g1_i2|m.5815
lcl|c218580_g2_i1|m.5839
lcl|c218666_g4_i1|m.5893
lcl|c218696_g8_i2|m.5906
lcl|c218703_g1_i4|m.5907
lcl|c201155_g1_i1|m.1182
lcl|c218722_g1_i2|m.5914
lcl|c218748_g1_i1|m.5931
lcl|c218755_g2_i2|m.5948
lcl|c218789_g1_i2|m.5965
lcl|c218814_g3_i7|m.5970
lcl|c218820_g4_i2|m.5974
lcl|c235544_g2_i4|m.21046
lcl|c218599_g3_i2|m.5847
lcl|c218840_g4_i1|m.5985
lcl|c240662_g2_i10|m.27558
lcl|c241837_g2_i10|m.28988
lcl|c220164_g3_i1|m.6775
lcl|c218842_g3_i2|m.5986
lcl|c218842_g3_i2|m.5987
lcl|c218852_g5_i3|m.5993
lcl|c218872_g2_i3|m.6012
lcl|c219090_g4_i2|m.6185
lcl|c230386_g2_i1|m.15223
lcl|c219163_g1_i3|m.6242
lcl|c219184_g1_i2|m.6256
lcl|c219187_g1_i1|m.6258
lcl|c219214_g1_i6|m.6280
lcl|c219274_g1_i6|m.6313
lcl|c201413_g4_i1|m.1201
lcl|c219485_g5_i3|m.6399
lcl|c219506_g5_i1|m.6423
lcl|c219564_g8_i2|m.6456
lcl|c219583_g2_i1|m.6468
lcl|c219601_g1_i1|m.6471
lcl|c219632_g2_i1|m.6493
lcl|c219636_g2_i1|m.6494
lcl|c219636_g2_i3|m.6495
lcl|c219659_g7_i1|m.6504
lcl|c217780_g1_i2|m.5363
lcl|c219674_g1_i1|m.6511
lcl|c201696_g3_i1|m.1219
lcl|c219704_g3_i2|m.6534
lcl|c219759_g3_i3|m.6556
lcl|c219817_g1_i3|m.6593
lcl|c219828_g4_i5|m.6597
lcl|c219841_g6_i1|m.6610
lcl|c219842_g1_i1|m.6611
lcl|c219870_g5_i1|m.6620
lcl|c219901_g4_i1|m.6631
lcl|c220008_g2_i5|m.6705
lcl|c201793_g1_i1|m.1223
lcl|c220011_g4_i9|m.6707
lcl|c220050_g2_i1|m.6739
lcl|c220189_g1_i1|m.6796
lcl|c220191_g1_i1|m.6799
lcl|c220226_g2_i9|m.6827
lcl|c220236_g4_i1|m.6833
lcl|c220252_g1_i3|m.6839
lcl|c220300_g3_i1|m.6859
lcl|c220319_g5_i1|m.6862
lcl|c220380_g1_i3|m.6911
lcl|c202641_g1_i1|m.1266
lcl|c220475_g1_i1|m.6962
lcl|c220485_g3_i1|m.6974
lcl|c220622_g1_i1|m.7032
lcl|c220638_g5_i1|m.7054
lcl|c220695_g1_i1|m.7091
lcl|c220748_g5_i2|m.7116
lcl|c220807_g2_i1|m.7165
lcl|c220831_g1_i1|m.7185
lcl|c202763_g1_i2|m.1275
lcl|c220845_g6_i1|m.7197
lcl|c220863_g2_i3|m.7207
lcl|c220923_g2_i4|m.7240
lcl|c220937_g5_i7|m.7248
lcl|c220954_g1_i2|m.7267
lcl|c220963_g1_i1|m.7276
lcl|c221031_g2_i1|m.7336
lcl|c221039_g3_i2|m.7343
lcl|c203193_g1_i1|m.1308
lcl|c221077_g1_i1|m.7374
lcl|c221105_g4_i2|m.7402
lcl|c221114_g2_i1|m.7405
lcl|c221130_g3_i2|m.7408
lcl|c221189_g3_i1|m.7459
lcl|c221194_g2_i1|m.7463
lcl|c221205_g1_i1|m.7472
lcl|c221238_g1_i4|m.7502
lcl|c221281_g1_i1|m.7530
lcl|c221296_g1_i3|m.7550
lcl|c203735_g1_i1|m.1335
lcl|c221301_g3_i3|m.7552
lcl|c221340_g4_i1|m.7579
lcl|c221427_g1_i4|m.7617
lcl|c221450_g9_i6|m.7639
lcl|c221464_g1_i3|m.7656
lcl|c221482_g2_i1|m.7668
lcl|c221514_g6_i1|m.7698
lcl|c221586_g4_i2|m.7745
lcl|c221593_g3_i1|m.7753
lcl|c221619_g2_i1|m.7763
lcl|c221649_g6_i2|m.7773
lcl|c221662_g2_i4|m.7775
lcl|c221694_g2_i1|m.7797
lcl|c221736_g1_i11|m.7820
lcl|c221753_g3_i7|m.7844
lcl|c221849_g1_i2|m.7917
lcl|c204019_g1_i1|m.1366
lcl|c221855_g2_i3|m.7925
lcl|c221890_g1_i1|m.7971
lcl|c221925_g1_i3|m.7988
lcl|c221967_g2_i3|m.8016
lcl|c221968_g1_i1|m.8017
lcl|c221999_g1_i4|m.8036
lcl|c222028_g1_i5|m.8060
lcl|c222117_g4_i1|m.8104
lcl|c222123_g3_i1|m.8109
lcl|c204436_g1_i1|m.1392
lcl|c222179_g3_i2|m.8147
lcl|c222186_g2_i2|m.8151
lcl|c222196_g3_i1|m.8162
lcl|c222200_g1_i1|m.8165
lcl|c222210_g1_i4|m.8175
lcl|c222286_g2_i1|m.8232
lcl|c222301_g1_i3|m.8235
lcl|c222306_g8_i4|m.8236
lcl|c145576_g1_i1|m.265
lcl|c204885_g2_i1|m.1407
lcl|c222319_g4_i3|m.8243
lcl|c222323_g2_i2|m.8244
lcl|c222323_g2_i2|m.8245
lcl|c222343_g4_i1|m.8262
lcl|c222353_g1_i1|m.8273
lcl|c222355_g2_i4|m.8274
lcl|c222377_g6_i1|m.8283
lcl|c222386_g1_i1|m.8298
lcl|c222400_g6_i5|m.8305
lcl|c222420_g3_i2|m.8319
lcl|c205012_g1_i1|m.1420
lcl|c222436_g10_i1|m.8337
lcl|c222484_g2_i1|m.8393
lcl|c222521_g8_i1|m.8406
lcl|c222526_g1_i2|m.8408
lcl|c222543_g3_i2|m.8418
lcl|c222546_g5_i2|m.8425
lcl|c222548_g1_i3|m.8426
lcl|c222555_g2_i4|m.8428
lcl|c222581_g2_i12|m.8451
lcl|c222581_g2_i12|m.8452
lcl|c222653_g7_i1|m.8496
lcl|c222691_g4_i1|m.8535
lcl|c222693_g1_i1|m.8538
lcl|c222727_g3_i2|m.8582
lcl|c222750_g1_i9|m.8600
lcl|c222797_g7_i2|m.8616
lcl|c222808_g2_i2|m.8627
lcl|c222818_g1_i1|m.8630
lcl|c222837_g1_i1|m.8646
lcl|c222852_g4_i5|m.8661
lcl|c222909_g1_i1|m.8698
lcl|c222929_g2_i3|m.8717
lcl|c222937_g2_i3|m.8724
lcl|c222943_g1_i1|m.8725
lcl|c222943_g1_i2|m.8726
lcl|c222950_g5_i5|m.8735
lcl|c222957_g1_i2|m.8747
lcl|c205488_g1_i1|m.1464
lcl|c223077_g2_i1|m.8858
lcl|c223139_g3_i2|m.8898
lcl|c223200_g1_i1|m.8933
lcl|c223205_g4_i1|m.8934
lcl|c223214_g1_i1|m.8951
lcl|c223247_g3_i6|m.8971
lcl|c223275_g1_i2|m.8992
lcl|c223317_g1_i2|m.9033
lcl|c223351_g1_i1|m.9046
lcl|c223390_g1_i1|m.9087
lcl|c205554_g2_i2|m.1468
lcl|c223425_g3_i3|m.9106
lcl|c223433_g6_i1|m.9115
lcl|c223583_g5_i3|m.9218
lcl|c223597_g3_i2|m.9232
lcl|c223604_g1_i1|m.9235
lcl|c223616_g1_i1|m.9252
lcl|c223617_g5_i1|m.9254
lcl|c205697_g1_i1|m.1481
lcl|c223646_g1_i2|m.9273
lcl|c223673_g1_i3|m.9293
lcl|c223689_g4_i1|m.9313
lcl|c223710_g5_i3|m.9324
lcl|c223716_g4_i1|m.9328
lcl|c223775_g7_i2|m.9373
lcl|c223798_g3_i1|m.9397
lcl|c223870_g1_i6|m.9447
lcl|c205713_g1_i1|m.1484
lcl|c223975_g3_i3|m.9516
lcl|c223983_g2_i8|m.9524
lcl|c224015_g2_i1|m.9549
lcl|c224026_g2_i1|m.9560
lcl|c224026_g2_i4|m.9562
lcl|c224042_g7_i2|m.9570
lcl|c224106_g1_i3|m.9604
lcl|c224156_g3_i2|m.9641
lcl|c224182_g8_i1|m.9652
lcl|c224201_g3_i8|m.9658
lcl|c224242_g3_i7|m.9677
lcl|c224289_g1_i1|m.9705
lcl|c224332_g10_i1|m.9746
lcl|c224365_g3_i1|m.9762
lcl|c224371_g5_i1|m.9765
lcl|c224405_g1_i1|m.9772
lcl|c224432_g1_i4|m.9787
lcl|c206417_g1_i2|m.1538
lcl|c224456_g4_i3|m.9819
lcl|c224457_g1_i1|m.9820
lcl|c224488_g1_i1|m.9847
lcl|c224493_g2_i5|m.9854
lcl|c224556_g6_i1|m.9931
lcl|c224557_g2_i1|m.9933
lcl|c224589_g7_i1|m.9992
lcl|c224597_g3_i1|m.10003
lcl|c224670_g2_i1|m.10052
lcl|c206531_g1_i1|m.1558
lcl|c224672_g1_i1|m.10055
lcl|c224672_g2_i1|m.10058
lcl|c224781_g7_i2|m.10124
lcl|c224812_g3_i3|m.10152
lcl|c224848_g2_i1|m.10169
lcl|c224866_g1_i2|m.10191
lcl|c224880_g4_i1|m.10208
lcl|c224918_g1_i1|m.10239
lcl|c206556_g1_i2|m.1565
lcl|c225015_g2_i1|m.10306
lcl|c225098_g3_i9|m.10362
lcl|c225110_g1_i1|m.10369
lcl|c225144_g2_i3|m.10400
lcl|c225172_g3_i1|m.10424
lcl|c225266_g1_i7|m.10481
lcl|c225267_g2_i1|m.10483
lcl|c225281_g3_i2|m.10487
lcl|c225308_g1_i1|m.10501
lcl|c225308_g1_i4|m.10503
lcl|c225323_g2_i2|m.10522
lcl|c225334_g1_i2|m.10531
lcl|c225334_g2_i2|m.10532
lcl|c225352_g1_i1|m.10544
lcl|c225394_g4_i2|m.10584
lcl|c225544_g1_i2|m.10720
lcl|c225590_g2_i4|m.10752
lcl|c225618_g2_i6|m.10783
lcl|c207254_g1_i2|m.1628
lcl|c225632_g3_i1|m.10790
lcl|c225668_g5_i2|m.10809
lcl|c225713_g4_i1|m.10851
lcl|c225713_g4_i1|m.10853
lcl|c225755_g1_i1|m.10912
lcl|c225761_g6_i1|m.10925
lcl|c225774_g3_i6|m.10935
lcl|c225782_g2_i1|m.10939
lcl|c207709_g1_i1|m.1673
lcl|c225829_g1_i1|m.10978
lcl|c225844_g2_i3|m.10984
lcl|c225849_g2_i3|m.10990
lcl|c225852_g2_i3|m.10992
lcl|c225867_g3_i1|m.11000
lcl|c225875_g4_i2|m.11006
lcl|c225884_g1_i1|m.11027
lcl|c225938_g3_i1|m.11067
lcl|c225972_g1_i1|m.11091
lcl|c225978_g1_i10|m.11104
lcl|c226005_g4_i1|m.11126
lcl|c226044_g1_i4|m.11148
lcl|c226046_g1_i2|m.11150
lcl|c226084_g3_i2|m.11194
lcl|c226099_g2_i1|m.11211
lcl|c226121_g5_i1|m.11230
lcl|c226127_g3_i4|m.11231
lcl|c226138_g1_i1|m.11235
lcl|c226138_g2_i1|m.11236
lcl|c226155_g2_i3|m.11249
lcl|c226189_g2_i2|m.11277
lcl|c226212_g1_i3|m.11297
lcl|c226216_g1_i2|m.11298
lcl|c226230_g2_i2|m.11305
lcl|c226287_g1_i1|m.11356
lcl|c207960_g1_i1|m.1712
lcl|c226287_g1_i2|m.11357
lcl|c226332_g1_i2|m.11417
lcl|c226346_g1_i1|m.11426
lcl|c226389_g3_i1|m.11454
lcl|c226409_g2_i1|m.11459
lcl|c226414_g3_i1|m.11460
lcl|c226450_g3_i4|m.11486
lcl|c226505_g3_i2|m.11536
lcl|c226593_g2_i1|m.11607
lcl|c226627_g2_i3|m.11631
lcl|c207967_g2_i1|m.1713
lcl|c226683_g4_i10|m.11705
lcl|c226723_g5_i2|m.11731
lcl|c226730_g3_i1|m.11735
lcl|c226765_g1_i1|m.11762
lcl|c226774_g3_i2|m.11777
lcl|c226786_g3_i2|m.11789
lcl|c226846_g2_i3|m.11856
lcl|c226898_g4_i1|m.11913
lcl|c226904_g2_i1|m.11919
lcl|c226917_g1_i2|m.11940
lcl|c226944_g1_i1|m.11952
lcl|c226971_g4_i11|m.11980
lcl|c226990_g1_i2|m.12024
lcl|c226999_g3_i5|m.12032
lcl|c227009_g2_i1|m.12051
lcl|c227063_g4_i1|m.12098
lcl|c162537_g1_i2|m.418
lcl|c208317_g1_i1|m.1768
lcl|c227136_g2_i8|m.12192
lcl|c227186_g4_i4|m.12220
lcl|c227188_g1_i1|m.12222
lcl|c227202_g1_i3|m.12234
lcl|c227266_g1_i1|m.12288
lcl|c227267_g3_i2|m.12289
lcl|c227270_g10_i4|m.12291
lcl|c227289_g1_i2|m.12315
lcl|c227290_g1_i5|m.12317
lcl|c227293_g2_i4|m.12320
lcl|c208387_g1_i1|m.1778
lcl|c227297_g1_i3|m.12321
lcl|c227322_g4_i4|m.12336
lcl|c227361_g2_i9|m.12363
lcl|c227365_g1_i1|m.12366
lcl|c227372_g6_i3|m.12377
lcl|c227414_g2_i1|m.12410
lcl|c227531_g4_i11|m.12520
lcl|c227533_g4_i2|m.12539
lcl|c227543_g1_i1|m.12562
lcl|c208684_g1_i2|m.1827
lcl|c227543_g1_i4|m.12563
lcl|c227548_g3_i11|m.12568
lcl|c227571_g1_i1|m.12592
lcl|c227586_g2_i2|m.12601
lcl|c227657_g3_i1|m.12650
lcl|c227676_g2_i3|m.12666
lcl|c227683_g10_i1|m.12674
lcl|c227702_g4_i1|m.12691
lcl|c227720_g2_i2|m.12706
lcl|c227721_g2_i2|m.12707
lcl|c208691_g4_i1|m.1828
lcl|c227726_g1_i1|m.12708
lcl|c227735_g3_i4|m.12716
lcl|c227738_g1_i4|m.12717
lcl|c227772_g1_i1|m.12754
lcl|c227794_g1_i1|m.12770
lcl|c227847_g4_i2|m.12829
lcl|c227852_g1_i7|m.12835
lcl|c227928_g3_i2|m.12899
lcl|c227937_g1_i7|m.12905
lcl|c208878_g1_i2|m.1846
lcl|c227969_g2_i1|m.12933
lcl|c227969_g5_i2|m.12934
lcl|c228038_g3_i1|m.12994
lcl|c228056_g1_i4|m.13006
lcl|c228109_g2_i1|m.13051
lcl|c228121_g2_i2|m.13058
lcl|c208940_g4_i1|m.1863
lcl|c228151_g1_i2|m.13084
lcl|c228205_g4_i2|m.13127
lcl|c228314_g1_i1|m.13228
lcl|c228317_g4_i1|m.13231
lcl|c228325_g7_i1|m.13245
lcl|c228330_g5_i1|m.13250
lcl|c228331_g1_i1|m.13257
lcl|c228374_g2_i1|m.13291
lcl|c228380_g1_i2|m.13296
lcl|c209114_g1_i1|m.1902
lcl|c228390_g1_i2|m.13299
lcl|c228456_g2_i1|m.13345
lcl|c228461_g1_i2|m.13347
lcl|c228497_g4_i1|m.13369
lcl|c228506_g1_i2|m.13379
lcl|c228524_g1_i1|m.13396
lcl|c228529_g1_i1|m.13404
lcl|c228583_g3_i2|m.13440
lcl|c228583_g6_i1|m.13441
lcl|c228611_g1_i2|m.13461
lcl|c209191_g2_i1|m.1916
lcl|c228611_g7_i1|m.13463
lcl|c228621_g3_i1|m.13469
lcl|c228623_g6_i3|m.13470
lcl|c228665_g3_i2|m.13504
lcl|c228709_g4_i2|m.13577
lcl|c228742_g3_i1|m.13609
lcl|c228773_g1_i1|m.13638
lcl|c228789_g1_i1|m.13647
lcl|c228825_g1_i1|m.13684
lcl|c209256_g1_i1|m.1929
lcl|c228838_g1_i2|m.13701
lcl|c228847_g1_i2|m.13712
lcl|c228864_g3_i2|m.13732
lcl|c228868_g10_i1|m.13735
lcl|c228869_g1_i2|m.13736
lcl|c228904_g1_i5|m.13760
lcl|c228908_g5_i3|m.13768
lcl|c228940_g3_i1|m.13807
lcl|c209298_g1_i1|m.1944
lcl|c228955_g3_i2|m.13813
lcl|c228984_g1_i2|m.13846
lcl|c229021_g1_i1|m.13887
lcl|c229025_g3_i1|m.13888
lcl|c229032_g2_i1|m.13894
lcl|c229032_g2_i3|m.13895
lcl|c229032_g2_i5|m.13896
lcl|c209326_g4_i1|m.1952
lcl|c229050_g10_i2|m.13907
lcl|c229055_g1_i1|m.13922
lcl|c229109_g1_i2|m.13969
lcl|c229162_g3_i1|m.14008
lcl|c229207_g3_i3|m.14046
lcl|c229261_g2_i4|m.14109
lcl|c229298_g2_i1|m.14136
lcl|c229310_g3_i5|m.14143
lcl|c209385_g1_i1|m.1957
lcl|c229348_g3_i2|m.14185
lcl|c229351_g6_i1|m.14197
lcl|c229422_g1_i2|m.14250
lcl|c229422_g1_i9|m.14251
lcl|c229426_g2_i2|m.14255
lcl|c229426_g2_i4|m.14256
lcl|c229445_g3_i3|m.14271
lcl|c229461_g3_i2|m.14279
lcl|c209492_g1_i1|m.1979
lcl|c229482_g2_i3|m.14286
lcl|c229532_g3_i4|m.14360
lcl|c229534_g2_i1|m.14362
lcl|c229541_g1_i10|m.14378
lcl|c229541_g1_i10|m.14379
lcl|c229550_g1_i3|m.14392
lcl|c229563_g2_i2|m.14411
lcl|c229579_g3_i1|m.14426
lcl|c229592_g3_i11|m.14442
lcl|c209513_g1_i2|m.1987
lcl|c229667_g6_i8|m.14511
lcl|c229676_g1_i1|m.14524
lcl|c229705_g1_i1|m.14556
lcl|c229735_g7_i1|m.14573
lcl|c229802_g6_i5|m.14639
lcl|c229808_g3_i3|m.14640
lcl|c229853_g1_i1|m.14683
lcl|c229881_g6_i6|m.14719
lcl|c229904_g1_i2|m.14752
lcl|c229913_g3_i1|m.14763
lcl|c229917_g4_i4|m.14770
lcl|c229939_g1_i1|m.14795
lcl|c230000_g8_i2|m.14843
lcl|c230026_g4_i1|m.14873
lcl|c209565_g1_i2|m.1999
lcl|c230032_g6_i1|m.14874
lcl|c230034_g1_i1|m.14877
lcl|c230065_g1_i2|m.14908
lcl|c230110_g2_i2|m.14961
lcl|c230136_g1_i1|m.14983
lcl|c230163_g1_i1|m.15005
lcl|c230171_g1_i1|m.15015
lcl|c230175_g2_i2|m.15021
lcl|c230178_g1_i1|m.15027
lcl|c230178_g1_i2|m.15028
lcl|c209565_g1_i2|m.2000
lcl|c230184_g2_i3|m.15031
lcl|c230192_g3_i5|m.15041
lcl|c230197_g3_i5|m.15044
lcl|c230270_g1_i2|m.15107
lcl|c230296_g1_i1|m.15135
lcl|c230355_g4_i3|m.15198
lcl|c230406_g3_i1|m.15260
lcl|c230411_g4_i1|m.15261
lcl|c230414_g1_i1|m.15275
lcl|c230498_g3_i2|m.15368
lcl|c230632_g1_i6|m.15498
lcl|c230725_g5_i4|m.15553
lcl|c230758_g1_i1|m.15596
lcl|c230771_g2_i1|m.15607
lcl|c230862_g3_i1|m.15714
lcl|c230890_g3_i2|m.15750
lcl|c230902_g1_i11|m.15765
lcl|c209757_g1_i1|m.2044
lcl|c230944_g4_i1|m.15814
lcl|c230960_g1_i5|m.15839
lcl|c231052_g3_i3|m.15929
lcl|c231068_g6_i2|m.15939
lcl|c231083_g2_i1|m.15952
lcl|c231085_g3_i1|m.15955
lcl|c231225_g3_i3|m.16055
lcl|c231252_g2_i1|m.16075
lcl|c209846_g4_i1|m.2055
lcl|c231257_g1_i8|m.16086
lcl|c231281_g6_i3|m.16097
lcl|c231364_g6_i1|m.16162
lcl|c231378_g1_i2|m.16165
lcl|c231445_g1_i1|m.16259
lcl|c231460_g1_i4|m.16283
lcl|c231462_g1_i10|m.16284
lcl|c231577_g2_i2|m.16429
lcl|c231601_g3_i1|m.16437
lcl|c164490_g1_i1|m.440
lcl|c210226_g1_i1|m.2139
lcl|c231621_g3_i3|m.16453
lcl|c231694_g3_i2|m.16524
lcl|c231698_g2_i1|m.16532
lcl|c231732_g6_i1|m.16569
lcl|c231737_g1_i3|m.16576
lcl|c231739_g1_i3|m.16580
lcl|c231789_g3_i2|m.16623
lcl|c231808_g9_i1|m.16644
lcl|c210228_g3_i1|m.2141
lcl|c231821_g3_i1|m.16651
lcl|c231826_g8_i1|m.16654
lcl|c231881_g1_i2|m.16748
lcl|c231884_g4_i1|m.16750
lcl|c231891_g1_i1|m.16759
lcl|c231904_g1_i7|m.16777
lcl|c231929_g5_i1|m.16788
lcl|c231929_g5_i4|m.16789
lcl|c231931_g2_i1|m.16792
lcl|c231967_g1_i2|m.16842
lcl|c231981_g4_i6|m.16864
lcl|c231996_g3_i3|m.16899
lcl|c231997_g2_i3|m.16900
lcl|c232008_g1_i2|m.16909
lcl|c232095_g2_i1|m.16982
lcl|c232105_g3_i1|m.16994
lcl|c232108_g1_i1|m.16997
lcl|c232108_g1_i2|m.16999
lcl|c210230_g1_i1|m.2146
lcl|c232133_g1_i5|m.17039
lcl|c232137_g2_i1|m.17041
lcl|c232232_g4_i1|m.17169
lcl|c232241_g6_i1|m.17171
lcl|c232241_g6_i3|m.17173
lcl|c232242_g3_i1|m.17174
lcl|c232294_g5_i11|m.17226
lcl|c232294_g5_i11|m.17227
lcl|c210331_g2_i2|m.2158
lcl|c232338_g2_i2|m.17255
lcl|c232350_g3_i1|m.17265
lcl|c232381_g2_i3|m.17311
lcl|c232401_g7_i2|m.17338
lcl|c232410_g1_i2|m.17346
lcl|c232424_g1_i6|m.17358
lcl|c232440_g3_i1|m.17372
lcl|c232511_g1_i6|m.17448
lcl|c232521_g1_i4|m.17458
lcl|c210338_g2_i1|m.2161
lcl|c232540_g2_i1|m.17495
lcl|c232541_g3_i1|m.17498
lcl|c232555_g1_i2|m.17516
lcl|c232638_g9_i1|m.17634
lcl|c232653_g3_i1|m.17643
lcl|c232676_g1_i2|m.17666
lcl|c232684_g7_i2|m.17670
lcl|c210342_g3_i4|m.2163
lcl|c232684_g7_i4|m.17671
lcl|c232692_g3_i1|m.17680
lcl|c232716_g1_i2|m.17708
lcl|c232736_g7_i11|m.17724
lcl|c232744_g5_i2|m.17733
lcl|c232745_g5_i1|m.17734
lcl|c232769_g4_i2|m.17751
lcl|c232783_g1_i1|m.17764
lcl|c210398_g1_i3|m.2174
lcl|c232791_g2_i3|m.17780
lcl|c232804_g4_i5|m.17788
lcl|c232813_g1_i6|m.17800
lcl|c232813_g3_i2|m.17801
lcl|c232821_g1_i1|m.17807
lcl|c232834_g2_i9|m.17824
lcl|c232842_g1_i1|m.17827
lcl|c232847_g2_i2|m.17831
lcl|c232847_g6_i1|m.17834
lcl|c232853_g2_i4|m.17839
lcl|c232854_g3_i11|m.17840
lcl|c232949_g3_i7|m.17939
lcl|c232983_g2_i2|m.17991
lcl|c233001_g2_i4|m.18006
lcl|c233033_g3_i4|m.18064
lcl|c233042_g5_i1|m.18070
lcl|c233061_g7_i1|m.18094
lcl|c210539_g3_i4|m.2197
lcl|c233068_g2_i1|m.18098
lcl|c233068_g2_i3|m.18101
lcl|c233135_g1_i3|m.18177
lcl|c233142_g2_i1|m.18198
lcl|c233156_g1_i1|m.18213
lcl|c233181_g4_i3|m.18256
lcl|c233212_g2_i5|m.18273
lcl|c233212_g2_i6|m.18275
lcl|c233217_g1_i2|m.18284
lcl|c167783_g1_i1|m.480
lcl|c210579_g1_i2|m.2209
lcl|c233247_g1_i1|m.18311
lcl|c233287_g2_i1|m.18368
lcl|c233339_g2_i12|m.18429
lcl|c233370_g1_i2|m.18468
lcl|c233425_g3_i4|m.18529
lcl|c233431_g1_i6|m.18546
lcl|c233449_g1_i1|m.18576
lcl|c233521_g3_i3|m.18674
lcl|c210580_g1_i3|m.2210
lcl|c233547_g3_i1|m.18698
lcl|c233547_g4_i3|m.18699
lcl|c233552_g1_i1|m.18704
lcl|c233577_g2_i4|m.18732
lcl|c233583_g1_i1|m.18736
lcl|c233583_g1_i3|m.18737
lcl|c233588_g6_i3|m.18739
lcl|c233596_g1_i1|m.18749
lcl|c233626_g4_i1|m.18797
lcl|c233650_g1_i7|m.18822
lcl|c233679_g3_i13|m.18855
lcl|c233739_g1_i1|m.18926
lcl|c233739_g3_i1|m.18931
lcl|c233761_g2_i1|m.18976
lcl|c233766_g4_i1|m.18988
lcl|c233811_g4_i2|m.19026
lcl|c210662_g1_i1|m.2231
lcl|c233818_g2_i6|m.19032
lcl|c233873_g4_i1|m.19119
lcl|c233954_g6_i2|m.19250
lcl|c233968_g2_i12|m.19271
lcl|c233968_g6_i1|m.19272
lcl|c234004_g4_i3|m.19315
lcl|c234022_g3_i1|m.19345
lcl|c234041_g5_i1|m.19364
lcl|c234054_g3_i2|m.19385
lcl|c234060_g2_i2|m.19387
lcl|c234075_g1_i1|m.19400
lcl|c234140_g5_i2|m.19531
lcl|c234149_g3_i1|m.19536
lcl|c234226_g1_i1|m.19634
lcl|c234277_g5_i1|m.19677
lcl|c234322_g7_i1|m.19718
lcl|c234352_g2_i1|m.19757
lcl|c234380_g5_i3|m.19780
lcl|c234439_g3_i1|m.19847
lcl|c234446_g3_i2|m.19850
lcl|c210735_g5_i3|m.2260
lcl|c234511_g2_i1|m.19914
lcl|c234639_g1_i1|m.20058
lcl|c234657_g3_i4|m.20097
lcl|c234687_g3_i2|m.20140
lcl|c234705_g1_i1|m.20159
lcl|c234712_g2_i1|m.20167
lcl|c234733_g4_i1|m.20188
lcl|c234738_g1_i1|m.20193
lcl|c234738_g1_i3|m.20194
lcl|c210749_g1_i1|m.2273
lcl|c234788_g2_i3|m.20258
lcl|c234789_g3_i1|m.20259
lcl|c234877_g1_i1|m.20373
lcl|c234891_g1_i3|m.20389
lcl|c234903_g3_i2|m.20397
lcl|c234934_g3_i3|m.20432
lcl|c234981_g4_i1|m.20476
lcl|c235036_g1_i1|m.20514
lcl|c235079_g5_i3|m.20543
lcl|c210957_g4_i1|m.2306
lcl|c235095_g3_i4|m.20556
lcl|c235126_g4_i1|m.20601
lcl|c235184_g7_i1|m.20675
lcl|c235213_g4_i11|m.20710
lcl|c235239_g6_i4|m.20736
lcl|c235240_g3_i2|m.20738
lcl|c235294_g4_i1|m.20789
lcl|c210994_g1_i1|m.2320
lcl|c235326_g4_i1|m.20819
lcl|c235389_g5_i2|m.20890
lcl|c235399_g7_i4|m.20891
lcl|c235481_g2_i1|m.20956
lcl|c235526_g4_i1|m.21004
lcl|c235585_g2_i7|m.21110
lcl|c235619_g2_i4|m.21138
lcl|c235627_g4_i5|m.21151
lcl|c235649_g2_i5|m.21175
lcl|c235649_g2_i5|m.21176
lcl|c235651_g1_i2|m.21178
lcl|c235663_g1_i3|m.21185
lcl|c235690_g8_i1|m.21219
lcl|c235712_g3_i3|m.21245
lcl|c235722_g2_i1|m.21267
lcl|c235743_g4_i1|m.21296
lcl|c235757_g3_i5|m.21305
lcl|c235769_g7_i2|m.21324

## Sheet: B_Proteins_T1.S
Protein
lcl|c122204_g1_i1|m.116
lcl|c169761_g1_i1|m.505
lcl|c211238_g1_i1|m.2379
lcl|c235850_g2_i3|m.21382
lcl|c235861_g2_i5|m.21394
lcl|c235937_g3_i1|m.21493
lcl|c235959_g6_i1|m.21503
lcl|c235993_g2_i2|m.21545
lcl|c236015_g2_i16|m.21586
lcl|c236035_g1_i2|m.21599
lcl|c236073_g1_i1|m.21645
lcl|c236101_g5_i2|m.21702
lcl|c236120_g2_i1|m.21731
lcl|c236131_g3_i3|m.21740
lcl|c236134_g1_i2|m.21741
lcl|c236135_g4_i5|m.21746
lcl|c236181_g1_i2|m.21806
lcl|c211368_g3_i1|m.2426
lcl|c236286_g4_i1|m.21959
lcl|c236333_g1_i1|m.22011
lcl|c236351_g2_i1|m.22019
lcl|c236389_g1_i1|m.22061
lcl|c236416_g2_i2|m.22088
lcl|c236507_g1_i5|m.22184
lcl|c236507_g1_i6|m.22186
lcl|c236523_g2_i4|m.22204
lcl|c211415_g1_i1|m.2432
lcl|c236527_g2_i1|m.22205
lcl|c236562_g3_i1|m.22244
lcl|c236655_g1_i2|m.22362
lcl|c236666_g2_i2|m.22384
lcl|c236706_g2_i4|m.22417
lcl|c236734_g2_i3|m.22454
lcl|c236795_g1_i2|m.22544
lcl|c236813_g3_i2|m.22564
lcl|c236822_g3_i10|m.22574
lcl|c236844_g2_i5|m.22607
lcl|c211436_g1_i2|m.2434
lcl|c236923_g1_i10|m.22692
lcl|c237097_g2_i1|m.22905
lcl|c237098_g1_i2|m.22911
lcl|c237104_g1_i8|m.22918
lcl|c237130_g1_i4|m.22955
lcl|c237136_g1_i1|m.22958
lcl|c237136_g3_i1|m.22962
lcl|c237191_g2_i5|m.23010
lcl|c237207_g2_i2|m.23024
lcl|c237211_g6_i4|m.23025
lcl|c237215_g1_i1|m.23031
lcl|c237256_g2_i1|m.23076
lcl|c237299_g2_i1|m.23132
lcl|c237320_g5_i2|m.23157
lcl|c237325_g2_i1|m.23163
lcl|c237387_g1_i1|m.23217
lcl|c237405_g1_i2|m.23236
lcl|c237440_g3_i2|m.23273
lcl|c211553_g1_i1|m.2455
lcl|c237490_g5_i6|m.23318
lcl|c237560_g2_i1|m.23397
lcl|c237587_g5_i1|m.23455
lcl|c237591_g3_i1|m.23457
lcl|c237591_g3_i4|m.23458
lcl|c237613_g1_i3|m.23496
lcl|c211563_g8_i2|m.2460
lcl|c237702_g1_i1|m.23627
lcl|c237753_g2_i2|m.23709
lcl|c237792_g3_i2|m.23754
lcl|c237832_g1_i6|m.23803
lcl|c237891_g2_i2|m.23861
lcl|c237894_g6_i1|m.23869
lcl|c237953_g4_i1|m.23928
lcl|c237969_g1_i5|m.23942
lcl|c238002_g5_i8|m.23981
lcl|c211604_g1_i1|m.2470
lcl|c238048_g5_i2|m.24043
lcl|c238052_g1_i4|m.24050
lcl|c238085_g2_i5|m.24082
lcl|c238115_g2_i1|m.24111
lcl|c238173_g3_i3|m.24203
lcl|c238175_g2_i3|m.24204
lcl|c238200_g3_i4|m.24238
lcl|c238338_g4_i1|m.24403
lcl|c211615_g1_i2|m.2471
lcl|c238365_g3_i1|m.24425
lcl|c238372_g5_i2|m.24429
lcl|c238378_g1_i1|m.24441
lcl|c238385_g2_i1|m.24454
lcl|c238409_g2_i5|m.24505
lcl|c238476_g3_i5|m.24565
lcl|c238499_g4_i2|m.24591
lcl|c238537_g2_i7|m.24631
lcl|c211660_g1_i1|m.2486
lcl|c238560_g5_i2|m.24666
lcl|c238572_g3_i3|m.24677
lcl|c238581_g1_i1|m.24692
lcl|c238657_g1_i1|m.24764
lcl|c238662_g3_i1|m.24774
lcl|c238663_g1_i2|m.24780
lcl|c238664_g1_i2|m.24781
lcl|c238677_g1_i1|m.24810
lcl|c238692_g2_i2|m.24838
lcl|c238733_g2_i2|m.24867
lcl|c238738_g2_i3|m.24871
lcl|c238756_g1_i5|m.24891
lcl|c238756_g1_i5|m.24892
lcl|c238814_g3_i2|m.24928
lcl|c238826_g2_i1|m.24957
lcl|c238833_g1_i2|m.24965
lcl|c238858_g2_i1|m.25014
lcl|c211774_g2_i1|m.2538
lcl|c238903_g3_i2|m.25053
lcl|c239007_g1_i1|m.25175
lcl|c239101_g4_i2|m.25293
lcl|c239132_g4_i1|m.25330
lcl|c239139_g1_i2|m.25341
lcl|c239139_g1_i7|m.25343
lcl|c239148_g1_i1|m.25358
lcl|c239269_g3_i1|m.25540
lcl|c239272_g3_i1|m.25542
lcl|c211861_g1_i1|m.2554
lcl|c239275_g1_i1|m.25549
lcl|c239343_g4_i4|m.25612
lcl|c239381_g2_i1|m.25706
lcl|c239392_g1_i1|m.25726
lcl|c239406_g1_i2|m.25742
lcl|c239409_g1_i2|m.25747
lcl|c239444_g1_i9|m.25795
lcl|c239464_g2_i1|m.25827
lcl|c211914_g5_i4|m.2567
lcl|c239483_g1_i2|m.25864
lcl|c239497_g2_i3|m.25879
lcl|c239561_g1_i2|m.25969
lcl|c239587_g1_i1|m.26015
lcl|c239610_g1_i3|m.26053
lcl|c239652_g2_i1|m.26096
lcl|c239662_g2_i17|m.26116
lcl|c239670_g2_i1|m.26141
lcl|c239673_g1_i3|m.26150
lcl|c212015_g2_i1|m.2602
lcl|c239684_g3_i6|m.26167
lcl|c239719_g1_i1|m.26241
lcl|c239813_g5_i1|m.26346
lcl|c239883_g8_i2|m.26469
lcl|c239887_g1_i1|m.26471
lcl|c239893_g3_i11|m.26489
lcl|c239893_g3_i11|m.26493
lcl|c239894_g3_i2|m.26508
lcl|c239908_g1_i5|m.26518
lcl|c239962_g2_i3|m.26573
lcl|c212026_g3_i1|m.2608
lcl|c239963_g4_i3|m.26575
lcl|c240014_g2_i1|m.26649
lcl|c240053_g2_i1|m.26700
lcl|c240104_g7_i1|m.26774
lcl|c240121_g3_i1|m.26818
lcl|c240175_g3_i1|m.26871
lcl|c240190_g1_i1|m.26888
lcl|c240251_g4_i1|m.26961
lcl|c212126_g1_i2|m.2626
lcl|c240260_g2_i7|m.26976
lcl|c240274_g5_i1|m.26994
lcl|c240300_g3_i7|m.27053
lcl|c240300_g3_i7|m.27054
lcl|c240327_g5_i1|m.27085
lcl|c240357_g2_i2|m.27113
lcl|c240403_g1_i1|m.27200
lcl|c240440_g6_i6|m.27259
lcl|c240453_g2_i2|m.27266
lcl|c240476_g1_i3|m.27281
lcl|c240483_g2_i2|m.27308
lcl|c240488_g1_i6|m.27324
lcl|c240532_g3_i2|m.27393
lcl|c240624_g3_i1|m.27496
lcl|c240628_g3_i3|m.27511
lcl|c240630_g1_i1|m.27515
lcl|c240640_g2_i1|m.27531
lcl|c240688_g3_i1|m.27609
lcl|c240709_g1_i1|m.27629
lcl|c240739_g2_i5|m.27680
lcl|c212237_g2_i1|m.2659
lcl|c240749_g2_i2|m.27696
lcl|c240761_g2_i10|m.27710
lcl|c240794_g1_i2|m.27749
lcl|c240794_g1_i3|m.27750
lcl|c240833_g3_i3|m.27779
lcl|c240857_g5_i1|m.27819
lcl|c240877_g2_i2|m.27858
lcl|c240904_g2_i1|m.27923
lcl|c240989_g2_i1|m.28022
lcl|c241031_g1_i1|m.28098
lcl|c241090_g1_i1|m.28152
lcl|c241114_g1_i2|m.28195
lcl|c241148_g1_i6|m.28240
lcl|c241192_g1_i4|m.28299
lcl|c241194_g4_i1|m.28300
lcl|c241220_g4_i2|m.28322
lcl|c241222_g2_i5|m.28326
lcl|c241251_g1_i1|m.28362
lcl|c212462_g1_i1|m.2727
lcl|c241269_g1_i2|m.28376
lcl|c241286_g1_i3|m.28381
lcl|c241299_g1_i6|m.28386
lcl|c241317_g4_i3|m.28425
lcl|c241317_g4_i4|m.28427
lcl|c241349_g1_i1|m.28471
lcl|c241359_g3_i12|m.28482
lcl|c241389_g1_i2|m.28515
lcl|c241409_g1_i4|m.28539
lcl|c212602_g3_i5|m.2781
lcl|c241444_g1_i2|m.28576
lcl|c241466_g2_i10|m.28615
lcl|c241498_g6_i2|m.28662
lcl|c241500_g1_i1|m.28663
lcl|c241502_g2_i1|m.28666
lcl|c241516_g1_i3|m.28672
lcl|c241579_g2_i1|m.28728
lcl|c241579_g2_i3|m.28729
lcl|c241608_g1_i1|m.28761
lcl|c212652_g1_i3|m.2790
lcl|c241630_g2_i5|m.28790
lcl|c241649_g4_i1|m.28823
lcl|c241650_g2_i3|m.28825
lcl|c241650_g2_i3|m.28826
lcl|c241754_g2_i1|m.28913
lcl|c241824_g2_i8|m.28976
lcl|c241824_g2_i8|m.28977
lcl|c241854_g3_i2|m.29002
lcl|c241873_g2_i3|m.29039
lcl|c212693_g1_i1|m.2804
lcl|c241909_g2_i2|m.29132
lcl|c241909_g2_i3|m.29133
lcl|c241916_g1_i1|m.29146
lcl|c241966_g1_i1|m.29199
lcl|c241966_g1_i2|m.29201
lcl|c242001_g1_i2|m.29236
lcl|c242066_g1_i1|m.29327
lcl|c242066_g1_i1|m.29328
lcl|c242089_g1_i1|m.29373
lcl|c242092_g2_i3|m.29375
lcl|c242139_g4_i2|m.29446
lcl|c242185_g2_i2|m.29491
lcl|c242193_g2_i1|m.29501
lcl|c242257_g2_i2|m.29551
lcl|c242277_g7_i2|m.29564
lcl|c242362_g2_i1|m.29700
lcl|c212727_g5_i1|m.2822
lcl|c242373_g3_i2|m.29725
lcl|c242381_g1_i1|m.29746
lcl|c242419_g1_i1|m.29781
lcl|c242463_g1_i3|m.29817
lcl|c242527_g2_i1|m.29909
lcl|c242541_g2_i5|m.29922
lcl|c242561_g4_i1|m.29954
lcl|c242581_g1_i1|m.29984
lcl|c242594_g2_i1|m.30002
lcl|c242644_g1_i1|m.30082
lcl|c242743_g1_i1|m.30188
lcl|c242793_g1_i1|m.30226
lcl|c242793_g1_i1|m.30227
lcl|c242803_g1_i3|m.30250
lcl|c242839_g1_i1|m.30267
lcl|c212821_g1_i2|m.2859
lcl|c242839_g1_i1|m.30268
lcl|c242839_g1_i1|m.30269
lcl|c242855_g1_i2|m.30293
lcl|c242878_g1_i4|m.30326
lcl|c242894_g3_i1|m.30343
lcl|c242902_g2_i1|m.30362
lcl|c242924_g1_i1|m.30399
lcl|c242928_g1_i2|m.30412
lcl|c242974_g2_i1|m.30459
lcl|c212826_g3_i1|m.2861
lcl|c243004_g1_i1|m.30509
lcl|c243010_g3_i1|m.30515
lcl|c243015_g1_i1|m.30516
lcl|c243045_g1_i1|m.30553
lcl|c243085_g1_i3|m.30591
lcl|c243086_g4_i2|m.30593
lcl|c243097_g5_i3|m.30604
lcl|c243117_g1_i1|m.30639
lcl|c212912_g1_i1|m.2890
lcl|c243149_g1_i2|m.30670
lcl|c243154_g1_i1|m.30688
lcl|c243228_g1_i1|m.30729
lcl|c243308_g5_i1|m.30798
lcl|c243349_g1_i4|m.30872
lcl|c243371_g1_i1|m.30909
lcl|c243397_g1_i1|m.30938
lcl|c243429_g2_i2|m.30976
lcl|c212937_g3_i2|m.2900
lcl|c243503_g5_i1|m.31038
lcl|c243506_g1_i6|m.31041
lcl|c243516_g2_i1|m.31047
lcl|c243541_g3_i2|m.31058
lcl|c243554_g1_i5|m.31071
lcl|c243614_g4_i2|m.31123
lcl|c243628_g3_i2|m.31151
lcl|c243633_g2_i1|m.31165
lcl|c243633_g2_i1|m.31166
lcl|c243654_g1_i2|m.31195
lcl|c243654_g1_i2|m.31196
lcl|c243671_g5_i1|m.31222
lcl|c243673_g1_i1|m.31225
lcl|c243724_g1_i1|m.31250
lcl|c243765_g1_i1|m.31282
lcl|c243774_g1_i2|m.31291
lcl|c243791_g1_i1|m.31323
lcl|c213022_g4_i5|m.2921
lcl|c243799_g1_i1|m.31328
lcl|c243893_g1_i1|m.31474
lcl|c243909_g1_i1|m.31505
lcl|c243935_g1_i3|m.31546
lcl|c243938_g2_i1|m.31548
lcl|c243954_g3_i1|m.31569
lcl|c213072_g1_i1|m.2941
lcl|c244055_g1_i3|m.31694
lcl|c244084_g2_i1|m.31724
lcl|c244126_g1_i2|m.31771
lcl|c244145_g1_i1|m.31801
lcl|c244164_g1_i1|m.31837
lcl|c244169_g2_i1|m.31846
lcl|c244173_g1_i4|m.31852
lcl|c213117_g1_i3|m.2966
lcl|c244197_g2_i1|m.31877
lcl|c244235_g1_i2|m.31919
lcl|c244249_g2_i1|m.31932
lcl|c244255_g3_i1|m.31943
lcl|c244259_g1_i1|m.31949
lcl|c244264_g3_i1|m.31952
lcl|c244278_g1_i1|m.31973
lcl|c244304_g2_i1|m.32002
lcl|c213147_g4_i1|m.2980
lcl|c244315_g1_i2|m.32024
lcl|c244324_g2_i1|m.32048
lcl|c244350_g3_i3|m.32077
lcl|c244363_g1_i1|m.32089
lcl|c244364_g1_i1|m.32091
lcl|c244389_g3_i1|m.32131
lcl|c244396_g1_i1|m.32137
lcl|c244407_g1_i3|m.32143
lcl|c244439_g1_i1|m.32192
lcl|c244441_g1_i1|m.32200
lcl|c213160_g2_i5|m.2982
lcl|c244452_g2_i2|m.32209
lcl|c244474_g3_i1|m.32253
lcl|c244484_g2_i1|m.32270
lcl|c244488_g3_i1|m.32282
lcl|c244489_g1_i1|m.32283
lcl|c244503_g2_i1|m.32303
lcl|c244508_g1_i1|m.32310
lcl|c65293_g1_i1|m.32646
lcl|c81884_g1_i1|m.32679
lcl|c213262_g2_i4|m.3006
lcl|c89067_g1_i1|m.32704
lcl|c98777_g1_i1|m.32741
lcl|c188073_g1_i1|m.763
lcl|c195747_g2_i1|m.945
lcl|c243887_g1_i1|m.31460
lcl|c201441_g1_i1|m.1204
lcl|c202129_g1_i1|m.1242
lcl|c213278_g3_i2|m.3010
lcl|c202472_g1_i1|m.1259
lcl|c202894_g5_i1|m.1285
lcl|c203483_g1_i2|m.1328
lcl|c204986_g3_i2|m.1414
lcl|c205358_g1_i2|m.1452
lcl|c206427_g2_i4|m.1541
lcl|c206859_g1_i1|m.1600
lcl|c236885_g1_i5|m.22663
lcl|c236885_g1_i7|m.22665
lcl|c236885_g1_i3|m.22659
lcl|c207332_g2_i2|m.1633
lcl|c207917_g13_i1|m.1708
lcl|c182463_g1_i1|m.663
lcl|c213306_g2_i1|m.3016
lcl|c208130_g1_i1|m.1735
lcl|c208140_g2_i1|m.1739
lcl|c209131_g1_i2|m.1905
lcl|c209570_g1_i3|m.2003
lcl|c210031_g1_i2|m.2100
lcl|c210253_g1_i2|m.2149
lcl|c243393_g3_i1|m.30930
lcl|c223677_g1_i1|m.9303
lcl|c224624_g4_i1|m.10025
lcl|c224624_g2_i1|m.10023
lcl|c235513_g2_i1|m.20994
lcl|c222682_g3_i7|m.8525
lcl|c229067_g1_i6|m.13938
lcl|c235115_g6_i1|m.20588
lcl|c244515_g4_i1|m.32348
lcl|c231210_g4_i4|m.16042
lcl|c219953_g4_i1|m.6659
lcl|c220204_g2_i2|m.6810
lcl|c222854_g1_i1|m.8663
lcl|c214584_g4_i1|m.3540
lcl|c220736_g3_i1|m.7111
lcl|c233257_g5_i1|m.18320
lcl|c229067_g1_i3|m.13935
lcl|c226414_g7_i1|m.11461
lcl|c210423_g1_i5|m.2178
lcl|c210652_g1_i3|m.2226
lcl|c210724_g2_i1|m.2253
lcl|c244023_g1_i1|m.31634
lcl|c213355_g3_i1|m.3053
lcl|c211001_g1_i6|m.2326
lcl|c211022_g1_i7|m.2328
lcl|c212784_g2_i1|m.2837
lcl|c212839_g1_i3|m.2877
lcl|c213314_g8_i4|m.3021
lcl|c213496_g2_i3|m.3109
lcl|c213576_g12_i2|m.3138
lcl|c213677_g1_i4|m.3168
lcl|c213837_g2_i3|m.3220
lcl|c213419_g4_i1|m.3080
lcl|c213874_g5_i4|m.3261
lcl|c213886_g7_i2|m.3271
lcl|c214228_g4_i6|m.3409
lcl|c214229_g1_i1|m.3410
lcl|c214242_g1_i2|m.3413
lcl|c213143_g1_i2|m.2979
lcl|c214356_g7_i5|m.3463
lcl|c214397_g6_i4|m.3476
lcl|c214499_g2_i2|m.3512
lcl|c214530_g4_i1|m.3518
lcl|c213465_g6_i10|m.3092
lcl|c214830_g3_i4|m.3696
lcl|c215124_g2_i2|m.3835
lcl|c215266_g1_i3|m.3907
lcl|c215450_g1_i1|m.4033
lcl|c215492_g2_i9|m.4058
lcl|c215553_g1_i10|m.4084
lcl|c213534_g3_i4|m.3118
lcl|c215761_g1_i1|m.4176
lcl|c215763_g2_i3|m.4184
lcl|c215894_g1_i3|m.4266
lcl|c215953_g5_i6|m.4317
lcl|c215963_g8_i2|m.4326
lcl|c216038_g5_i1|m.4365
lcl|c216057_g3_i1|m.4371
lcl|c216057_g3_i4|m.4374
lcl|c216124_g1_i3|m.4406
lcl|c216129_g1_i2|m.4409
lcl|c213742_g1_i10|m.3190
lcl|c216163_g1_i3|m.4416
lcl|c216367_g2_i7|m.4555
lcl|c216377_g1_i3|m.4559
lcl|c216500_g6_i5|m.4616
lcl|c216645_g1_i1|m.4691
lcl|c217098_g2_i2|m.4966
lcl|c213743_g5_i1|m.3191
lcl|c217182_g4_i3|m.5021
lcl|c217182_g4_i2|m.5020
lcl|c217312_g3_i2|m.5103
lcl|c217341_g1_i2|m.5116
lcl|c217405_g1_i6|m.5180
lcl|c217427_g4_i1|m.5185
lcl|c217466_g1_i3|m.5215
lcl|c230117_g1_i3|m.14970
lcl|c217585_g1_i2|m.5268
lcl|c217591_g3_i2|m.5272
lcl|c213826_g1_i1|m.3216
lcl|c217854_g5_i6|m.5415
lcl|c217988_g6_i3|m.5463
lcl|c218196_g3_i9|m.5616
lcl|c218214_g1_i2|m.5634
lcl|c218357_g3_i2|m.5741
lcl|c218374_g1_i3|m.5753
lcl|c218647_g3_i1|m.5884
lcl|c218730_g2_i11|m.5922
lcl|c218844_g4_i7|m.5991
lcl|c213850_g3_i2|m.3229
lcl|c218881_g3_i2|m.6022
lcl|c218968_g13_i5|m.6107
lcl|c219160_g4_i1|m.6235
lcl|c219237_g2_i4|m.6297
lcl|c219327_g1_i2|m.6330
lcl|c219462_g5_i7|m.6389
lcl|c219473_g3_i1|m.6396
lcl|c219495_g3_i10|m.6406
lcl|c219546_g2_i1|m.6439
lcl|c219556_g4_i5|m.6447
lcl|c213850_g4_i1|m.3231
lcl|c219662_g1_i2|m.6507
lcl|c219710_g2_i1|m.6538
lcl|c214653_g2_i1|m.3571
lcl|c219733_g1_i5|m.6547
lcl|c219829_g2_i1|m.6600
lcl|c219883_g1_i2|m.6624
lcl|c220306_g1_i5|m.6860
lcl|c220360_g1_i5|m.6901
lcl|c220409_g3_i3|m.6926
lcl|c220629_g1_i1|m.7036
lcl|c183284_g1_i1|m.675
lcl|c220633_g2_i2|m.7049
lcl|c220640_g5_i2|m.7065
lcl|c220657_g1_i4|m.7075
lcl|c220808_g2_i6|m.7171
lcl|c220897_g5_i4|m.7224
lcl|c220945_g4_i2|m.7256
lcl|c220947_g2_i1|m.7263
lcl|c220977_g2_i3|m.7288
lcl|c221039_g1_i2|m.7339
lcl|c213946_g11_i4|m.3301
lcl|c221077_g4_i2|m.7375
lcl|c221101_g1_i4|m.7399
lcl|c221225_g1_i6|m.7493
lcl|c221281_g1_i1|m.7531
lcl|c221356_g3_i2|m.7588
lcl|c221374_g4_i3|m.7595
lcl|c221440_g2_i5|m.7632
lcl|c221441_g1_i5|m.7633
lcl|c221482_g1_i3|m.7664
lcl|c221497_g1_i2|m.7677
lcl|c221524_g4_i2|m.7708
lcl|c221524_g4_i1|m.7707
lcl|c221583_g3_i2|m.7741
lcl|c221608_g1_i1|m.7755
lcl|c221672_g4_i6|m.7784
lcl|c221676_g4_i4|m.7786
lcl|c225423_g3_i2|m.10600
lcl|c227927_g4_i1|m.12894
lcl|c228653_g2_i5|m.13498
lcl|c221802_g2_i1|m.7868
lcl|c217326_g3_i1|m.5105
lcl|c221883_g2_i12|m.7953
lcl|c222140_g4_i1|m.8123
lcl|c222155_g2_i2|m.8140
lcl|c214032_g1_i4|m.3331
lcl|c222208_g5_i7|m.8170
lcl|c222306_g9_i1|m.8237
lcl|c222339_g3_i2|m.8253
lcl|c222399_g1_i2|m.8304
lcl|c244474_g2_i1|m.32252
lcl|c224694_g1_i1|m.10068
lcl|c222419_g1_i6|m.8316
lcl|c222437_g1_i2|m.8353
lcl|c222451_g1_i1|m.8369
lcl|c214108_g4_i4|m.3369
lcl|c222459_g5_i1|m.8379
lcl|c222639_g5_i2|m.8480
lcl|c222667_g10_i4|m.8510
lcl|c222899_g2_i4|m.8691
lcl|c222915_g1_i4|m.8711
lcl|c222946_g2_i3|m.8728
lcl|c220806_g2_i3|m.7164
lcl|c214189_g1_i1|m.3388
lcl|c222950_g5_i5|m.8734
lcl|c222960_g2_i1|m.8750
lcl|c214118_g1_i2|m.3372
lcl|c223053_g2_i3|m.8836
lcl|c223078_g3_i2|m.8859
lcl|c223098_g6_i3|m.8878
lcl|c223162_g2_i6|m.8914
lcl|c223274_g3_i3|m.8991
lcl|c223277_g3_i4|m.8995
lcl|c223331_g1_i2|m.9037
lcl|c223345_g3_i1|m.9044
lcl|c223355_g1_i3|m.9051
lcl|c214211_g3_i3|m.3396
lcl|c223365_g2_i2|m.9063
lcl|c223378_g2_i2|m.9075
lcl|c223414_g3_i3|m.9104
lcl|c223448_g1_i3|m.9130
lcl|c223454_g1_i3|m.9139
lcl|c223499_g2_i8|m.9175
lcl|c223499_g2_i6|m.9173
lcl|c223556_g1_i6|m.9203
lcl|c223629_g2_i1|m.9258
lcl|c223629_g2_i2|m.9260
lcl|c223635_g1_i2|m.9265
lcl|c223654_g2_i3|m.9281
lcl|c223673_g2_i1|m.9297
lcl|c223761_g4_i7|m.9360
lcl|c223761_g4_i10|m.9352
lcl|c223794_g7_i1|m.9389
lcl|c223808_g2_i1|m.9405
lcl|c223865_g4_i2|m.9445
lcl|c223901_g5_i2|m.9467
lcl|c223941_g1_i2|m.9485
lcl|c221840_g3_i2|m.7908
lcl|c221840_g3_i5|m.7911
lcl|c224714_g2_i1|m.10079
lcl|c214319_g7_i2|m.3452
lcl|c224029_g4_i1|m.9563
lcl|c224057_g7_i5|m.9575
lcl|c224226_g3_i4|m.9666
lcl|c224257_g2_i4|m.9682
lcl|c224260_g2_i3|m.9686
lcl|c224263_g3_i3|m.9691
lcl|c224312_g2_i3|m.9718
lcl|c203039_g1_i1|m.1291
lcl|c224498_g4_i2|m.9859
lcl|c224541_g6_i2|m.9899
lcl|c224583_g1_i1|m.9971
lcl|c224591_g2_i4|m.9998
lcl|c224713_g2_i1|m.10075
lcl|c224811_g1_i3|m.10150
lcl|c224835_g5_i2|m.10167
lcl|c224848_g3_i5|m.10172
lcl|c224890_g1_i1|m.10217
lcl|c224995_g6_i2|m.10289
lcl|c187253_g2_i1|m.744
lcl|c214539_g3_i1|m.3522
lcl|c225132_g1_i3|m.10387
lcl|c225136_g5_i9|m.10397
lcl|c225156_g8_i5|m.10409
lcl|c225214_g2_i5|m.10448
lcl|c225222_g1_i4|m.10453
lcl|c225236_g1_i2|m.10460
lcl|c225245_g1_i2|m.10472
lcl|c225457_g2_i2|m.10643
lcl|c214559_g9_i1|m.3528
lcl|c225471_g2_i2|m.10654
lcl|c225478_g2_i1|m.10667
lcl|c225747_g4_i1|m.10900
lcl|c225753_g2_i5|m.10911
lcl|c223432_g3_i1|m.9111
lcl|c225756_g1_i2|m.10914
lcl|c225775_g7_i7|m.10937
lcl|c225789_g4_i1|m.10946
lcl|c225859_g2_i6|m.10997
lcl|c214573_g3_i1|m.3534
lcl|c226079_g3_i1|m.11186
lcl|c226079_g3_i2|m.11188
lcl|c226146_g2_i7|m.11244
lcl|c226156_g7_i2|m.11251
lcl|c226613_g4_i3|m.11623
lcl|c226629_g1_i3|m.11641
lcl|c214602_g8_i1|m.3549
lcl|c226715_g5_i2|m.11728
lcl|c226739_g4_i2|m.11743
lcl|c226769_g3_i1|m.11767
lcl|c210478_g1_i4|m.2192
lcl|c226933_g1_i6|m.11949
lcl|c226971_g4_i9|m.11985
lcl|c226978_g9_i3|m.11996
lcl|c227034_g2_i12|m.12080
lcl|c227069_g2_i12|m.12102
lcl|c227108_g1_i3|m.12161
lcl|c237065_g1_i1|m.22858
lcl|c227129_g2_i15|m.12185
lcl|c227180_g1_i4|m.12217
lcl|c227188_g1_i3|m.12224
lcl|c227206_g2_i7|m.12247
lcl|c227332_g2_i2|m.12341
lcl|c227537_g2_i4|m.12549
lcl|c227562_g6_i1|m.12582
lcl|c227564_g2_i6|m.12586
lcl|c214656_g8_i1|m.3574
lcl|c227758_g2_i4|m.12736
lcl|c227780_g2_i3|m.12767
lcl|c227804_g2_i3|m.12774
lcl|c227856_g7_i5|m.12838
lcl|c227887_g3_i2|m.12871
lcl|c227910_g4_i10|m.12878
lcl|c227928_g1_i2|m.12896
lcl|c227928_g3_i7|m.12901
lcl|c227939_g2_i2|m.12910
lcl|c214667_g2_i8|m.3577
lcl|c227958_g2_i1|m.12924
lcl|c227993_g1_i6|m.12952
lcl|c228113_g1_i1|m.13052
lcl|c228221_g2_i9|m.13137
lcl|c228244_g5_i1|m.13157
lcl|c228245_g4_i3|m.13160
lcl|c228300_g4_i1|m.13216
lcl|c228309_g1_i6|m.13221
lcl|c214691_g1_i1|m.3614
lcl|c228406_g1_i6|m.13304
lcl|c228453_g2_i2|m.13342
lcl|c228525_g4_i3|m.13399
lcl|c228543_g5_i2|m.13413
lcl|c228608_g2_i2|m.13456
lcl|c228666_g1_i2|m.13507
lcl|c228678_g2_i11|m.13512
lcl|c228683_g1_i7|m.13540
lcl|c228700_g2_i5|m.13572
lcl|c228700_g2_i1|m.13568
lcl|c214720_g1_i1|m.3639
lcl|c228728_g1_i4|m.13597
lcl|c228746_g3_i3|m.13615
lcl|c228746_g2_i5|m.13610
lcl|c228772_g4_i5|m.13636
lcl|c228794_g3_i8|m.13650
lcl|c228830_g2_i1|m.13692
lcl|c228994_g6_i1|m.13852
lcl|c229012_g1_i8|m.13875
lcl|c229056_g1_i4|m.13924
lcl|c229060_g1_i1|m.13927
lcl|c214720_g2_i1|m.3640
lcl|c229073_g2_i1|m.13946
lcl|c229089_g2_i5|m.13955
lcl|c229110_g2_i1|m.13970
lcl|c229132_g1_i2|m.13984
lcl|c229134_g1_i1|m.13988
lcl|c229184_g1_i1|m.14022
lcl|c229340_g1_i1|m.14173
lcl|c229362_g2_i10|m.14209
lcl|c229412_g3_i1|m.14240
lcl|c187971_g1_i1|m.759
lcl|c229503_g1_i3|m.14339
lcl|c229507_g2_i4|m.14343
lcl|c229561_g1_i12|m.14408
lcl|c229615_g3_i4|m.14451
lcl|c229670_g1_i2|m.14513
lcl|c229692_g2_i9|m.14545
lcl|c229742_g2_i1|m.14577
lcl|c229751_g1_i2|m.14592
lcl|c229768_g1_i6|m.14605
lcl|c214832_g3_i2|m.3697
lcl|c229808_g4_i2|m.14641
lcl|c229886_g1_i6|m.14730
lcl|c229886_g1_i5|m.14728
lcl|c229886_g1_i1|m.14723
lcl|c230002_g4_i1|m.14846
lcl|c230011_g2_i5|m.14861
lcl|c230039_g1_i2|m.14881
lcl|c230054_g1_i7|m.14897
lcl|c230102_g4_i1|m.14957
lcl|c214891_g1_i1|m.3715
lcl|c230124_g3_i6|m.14973
lcl|c230150_g4_i2|m.14989
lcl|c230186_g5_i1|m.15032
lcl|c230220_g1_i2|m.15064
lcl|c230220_g1_i3|m.15065
lcl|c230276_g3_i1|m.15112
lcl|c230360_g10_i5|m.15205
lcl|c230398_g2_i4|m.15241
lcl|c230398_g2_i8|m.15247
lcl|c230405_g2_i9|m.15259
lcl|c214925_g1_i1|m.3737
lcl|c230431_g5_i1|m.15286
lcl|c230434_g3_i8|m.15304
lcl|c230438_g3_i4|m.15312
lcl|c230481_g5_i1|m.15356
lcl|c230636_g2_i1|m.15503
lcl|c230792_g1_i1|m.15630
lcl|c230823_g3_i1|m.15672
lcl|c230829_g2_i5|m.15683
lcl|c230880_g3_i5|m.15737
lcl|c230947_g2_i4|m.15815
lcl|c230953_g1_i2|m.15824
lcl|c231030_g9_i2|m.15907
lcl|c231043_g3_i4|m.15925
lcl|c231142_g1_i4|m.15993
lcl|c215957_g2_i7|m.4321
lcl|c231190_g4_i3|m.16030
lcl|c231190_g4_i6|m.16031
lcl|c231257_g1_i5|m.16082
lcl|c231285_g1_i2|m.16098
lcl|c231326_g2_i1|m.16129
lcl|c231339_g4_i2|m.16143
lcl|c214971_g6_i7|m.3760
lcl|c231352_g2_i1|m.16156
lcl|c231430_g2_i6|m.16242
lcl|c231430_g2_i12|m.16236
lcl|c231440_g4_i2|m.16256
lcl|c231469_g3_i4|m.16290
lcl|c231477_g1_i1|m.16301
lcl|c231506_g1_i1|m.16344
lcl|c231559_g1_i5|m.16408
lcl|c231575_g5_i2|m.16426
lcl|c231634_g1_i2|m.16472
lcl|c231859_g5_i5|m.16713
lcl|c238311_g1_i2|m.24377
lcl|c214714_g4_i1|m.3630
lcl|c221076_g3_i4|m.7373
lcl|c243020_g2_i5|m.30523
lcl|c225899_g3_i1|m.11041
lcl|c221146_g4_i1|m.7411
lcl|c231864_g5_i1|m.16720
lcl|c231896_g2_i12|m.16763
lcl|c231963_g1_i7|m.16837
lcl|c231982_g2_i3|m.16868
lcl|c232046_g3_i8|m.16952
lcl|c232109_g7_i6|m.17002
lcl|c232116_g4_i2|m.17015
lcl|c232149_g3_i2|m.17053
lcl|c232249_g2_i1|m.17180
lcl|c232274_g1_i4|m.17210
lcl|c232369_g2_i7|m.17306
lcl|c232426_g1_i1|m.17360
lcl|c232498_g1_i2|m.17421
lcl|c232520_g2_i5|m.17456
lcl|c232559_g1_i3|m.17522
lcl|c232758_g3_i3|m.17747
lcl|c215093_g1_i2|m.3818
lcl|c232843_g1_i4|m.17830
lcl|c226607_g5_i2|m.11621
lcl|c232931_g1_i10|m.17922
lcl|c233011_g1_i2|m.18023
lcl|c233012_g3_i3|m.18031
lcl|c233024_g1_i6|m.18051
lcl|c233026_g1_i2|m.18055
lcl|c233030_g2_i3|m.18059
lcl|c233040_g3_i1|m.18068
lcl|c233048_g1_i8|m.18077
lcl|c215258_g3_i5|m.3905
lcl|c233068_g3_i4|m.18107
lcl|c233068_g3_i2|m.18104
lcl|c211676_g2_i1|m.2488
lcl|c211676_g2_i2|m.2489
lcl|c233088_g8_i4|m.18128
lcl|c233103_g2_i1|m.18143
lcl|c233130_g1_i1|m.18171
lcl|c233215_g1_i5|m.18281
lcl|c233235_g3_i2|m.18302
lcl|c233260_g1_i1|m.18321
lcl|c233306_g1_i2|m.18390
lcl|c233334_g2_i12|m.18425
lcl|c233334_g2_i17|m.18426
lcl|c188047_g2_i2|m.760
lcl|c215279_g2_i6|m.3910
lcl|c233342_g3_i7|m.18440
lcl|c233377_g4_i3|m.18471
lcl|c233384_g5_i1|m.18475
lcl|c233495_g1_i1|m.18614
lcl|c233557_g1_i1|m.18714
lcl|c233661_g2_i3|m.18841
lcl|c233765_g2_i1|m.18981
lcl|c233767_g1_i3|m.18989
lcl|c233774_g10_i4|m.19004
lcl|c233774_g10_i1|m.19002
lcl|c233784_g1_i2|m.19012
lcl|c215299_g2_i2|m.3927
lcl|c233817_g1_i1|m.19030
lcl|c233833_g1_i2|m.19042
lcl|c233905_g2_i1|m.19151
lcl|c233922_g1_i2|m.19174
lcl|c228945_g3_i2|m.13809
lcl|c233948_g1_i2|m.19238
lcl|c233953_g2_i7|m.19245
lcl|c234077_g1_i1|m.19404
lcl|c234080_g1_i1|m.19410
lcl|c234082_g2_i6|m.19416
lcl|c215313_g3_i2|m.3930
lcl|c234108_g1_i5|m.19456
lcl|c234120_g6_i1|m.19489
lcl|c234135_g3_i2|m.19525
lcl|c234181_g4_i3|m.19583
lcl|c234222_g6_i3|m.19630
lcl|c234421_g4_i7|m.19822
lcl|c234442_g1_i3|m.19849
lcl|c215316_g1_i1|m.3942
lcl|c234533_g4_i3|m.19947
lcl|c234544_g3_i6|m.19962
lcl|c234579_g2_i6|m.20008
lcl|c234620_g1_i3|m.20041
lcl|c234626_g4_i3|m.20042
lcl|c229538_g7_i4|m.14373
lcl|c234643_g1_i12|m.20068
lcl|c234643_g1_i1|m.20065
lcl|c234643_g1_i2|m.20073
lcl|c234643_g1_i7|m.20081
lcl|c234643_g1_i6|m.20078
lcl|c234655_g3_i2|m.20090
lcl|c234687_g2_i2|m.20139
lcl|c234783_g2_i5|m.20249
lcl|c215397_g1_i1|m.4004
lcl|c234833_g2_i3|m.20312
lcl|c234833_g2_i1|m.20306
lcl|c234851_g1_i2|m.20336
lcl|c234869_g3_i5|m.20367
lcl|c234883_g2_i2|m.20378
lcl|c234883_g2_i9|m.20380
lcl|c234898_g1_i3|m.20394
lcl|c234912_g2_i1|m.20410
lcl|c234955_g3_i8|m.20446
lcl|c235052_g1_i4|m.20524
lcl|c223297_g2_i1|m.9009
lcl|c235089_g1_i3|m.20552
lcl|c235253_g1_i1|m.20757
lcl|c235276_g3_i3|m.20780
lcl|c235384_g3_i4|m.20872
lcl|c235446_g2_i1|m.20934
lcl|c235506_g6_i4|m.20981
lcl|c235529_g1_i1|m.21016
lcl|c217263_g3_i1|m.5056
lcl|c234134_g6_i1|m.19522
lcl|c235530_g1_i2|m.21019
lcl|c235548_g1_i1|m.21054
lcl|c235627_g4_i3|m.21149
lcl|c215430_g1_i6|m.4026
lcl|c235710_g2_i3|m.21243
lcl|c235710_g2_i1|m.21242
lcl|c235735_g2_i4|m.21279
lcl|c235859_g3_i3|m.21393
lcl|c235877_g4_i2|m.21429
lcl|c236087_g2_i1|m.21666
lcl|c236114_g1_i1|m.21718
lcl|c236138_g1_i3|m.21749
lcl|c236174_g2_i1|m.21787
lcl|c236195_g2_i4|m.21823
lcl|c236195_g4_i1|m.21828
lcl|c236195_g2_i1|m.21821
lcl|c236210_g3_i1|m.21846
lcl|c236213_g2_i1|m.21849
lcl|c236234_g4_i10|m.21877
lcl|c236239_g1_i2|m.21882
lcl|c236250_g3_i7|m.21896
lcl|c236256_g2_i1|m.21902
lcl|c236356_g1_i1|m.22029
lcl|c236360_g3_i2|m.22033
lcl|c236444_g1_i2|m.22121
lcl|c215455_g1_i1|m.4036
lcl|c236445_g2_i1|m.22123
lcl|c236445_g2_i3|m.22125
lcl|c236486_g1_i1|m.22162
lcl|c236516_g4_i3|m.22202
lcl|c236683_g3_i1|m.22390
lcl|c236700_g2_i2|m.22413
lcl|c236793_g3_i9|m.22532
lcl|c236859_g1_i3|m.22625
lcl|c236867_g1_i1|m.22637
lcl|c236892_g3_i5|m.22669
lcl|c236892_g3_i6|m.22670
lcl|c215465_g1_i1|m.4044
lcl|c236909_g3_i2|m.22685
lcl|c235901_g3_i2|m.21452
lcl|c184118_g1_i1|m.691
lcl|c236955_g1_i6|m.22720
lcl|c237004_g1_i4|m.22774
lcl|c237191_g2_i2|m.23009
lcl|c237237_g1_i5|m.23062
lcl|c237311_g4_i1|m.23148
lcl|c237328_g3_i1|m.23165
lcl|c237504_g2_i2|m.23334
lcl|c237535_g3_i3|m.23359
lcl|c191891_g1_i1|m.849
lcl|c215551_g6_i1|m.4083
lcl|c237550_g1_i1|m.23390
lcl|c237576_g2_i7|m.23440
lcl|c237578_g2_i2|m.23441
lcl|c237593_g3_i1|m.23463
lcl|c237593_g3_i5|m.23465
lcl|c237602_g1_i1|m.23479
lcl|c237609_g2_i1|m.23487
lcl|c237638_g1_i15|m.23528
lcl|c237658_g3_i4|m.23566
lcl|c237658_g3_i3|m.23565
lcl|c215606_g3_i1|m.4107
lcl|c237711_g3_i12|m.23641
lcl|c237732_g2_i2|m.23675
lcl|c237732_g2_i12|m.23671
lcl|c237805_g1_i7|m.23781
lcl|c237814_g2_i3|m.23786
lcl|c237814_g2_i4|m.23787
lcl|c237851_g2_i1|m.23817
lcl|c237883_g5_i1|m.23858
lcl|c237938_g3_i2|m.23906
lcl|c237955_g4_i3|m.23932
lcl|c237982_g4_i2|m.23956
lcl|c215616_g6_i2|m.4120
lcl|c238005_g1_i2|m.23984
lcl|c238005_g1_i4|m.23993
lcl|c238054_g2_i6|m.24053
lcl|c238111_g1_i1|m.24102
lcl|c238116_g1_i4|m.24117
lcl|c238132_g3_i11|m.24132
lcl|c238132_g3_i10|m.24131
lcl|c238132_g3_i1|m.24130
lcl|c238140_g4_i1|m.24154
lcl|c238150_g1_i3|m.24168
lcl|c238150_g1_i2|m.24167
lcl|c238164_g1_i1|m.24182
lcl|c238296_g3_i2|m.24349
lcl|c215627_g1_i1|m.4125
lcl|c238364_g3_i7|m.24424
lcl|c238364_g3_i1|m.24422
lcl|c238381_g2_i2|m.24448
lcl|c238399_g3_i5|m.24485
lcl|c238399_g3_i2|m.24483
lcl|c238399_g3_i3|m.24484
lcl|c238429_g5_i1|m.24515
lcl|c238491_g1_i8|m.24586
lcl|c238537_g2_i6|m.24628
lcl|c229550_g1_i3|m.14393
lcl|c201183_g1_i1|m.1186
lcl|c238647_g1_i1|m.24759
lcl|c238662_g3_i6|m.24778
lcl|c238676_g4_i3|m.24804
lcl|c215636_g1_i1|m.4133
lcl|c238681_g1_i11|m.24819
lcl|c238754_g1_i3|m.24885
lcl|c238843_g5_i10|m.24992
lcl|c238850_g2_i5|m.25002
lcl|c238853_g1_i1|m.25008
lcl|c238912_g1_i4|m.25063
lcl|c238912_g1_i8|m.25068
lcl|c238919_g4_i6|m.25079
lcl|c238994_g2_i3|m.25167
lcl|c215667_g2_i4|m.4143
lcl|c239042_g1_i1|m.25217
lcl|c239125_g3_i2|m.25324
lcl|c239136_g4_i3|m.25338
lcl|c239191_g2_i1|m.25412
lcl|c239216_g2_i7|m.25448
lcl|c239229_g3_i1|m.25467
lcl|c239240_g3_i4|m.25490
lcl|c239261_g1_i11|m.25522
lcl|c239261_g1_i12|m.25525
lcl|c215676_g2_i1|m.4150
lcl|c239281_g1_i1|m.25557
lcl|c239419_g1_i1|m.25763
lcl|c239419_g1_i10|m.25764
lcl|c239424_g1_i7|m.25774
lcl|c239517_g6_i1|m.25917
lcl|c239543_g6_i2|m.25954
lcl|c239546_g1_i2|m.25957
lcl|c239571_g1_i8|m.25993
lcl|c239643_g6_i2|m.26073
lcl|c239662_g2_i17|m.26115
lcl|c239700_g3_i2|m.26207
lcl|c239722_g4_i5|m.26254
lcl|c239763_g2_i3|m.26299
lcl|c239814_g2_i1|m.26347
lcl|c239814_g2_i3|m.26348
lcl|c239816_g8_i1|m.26351
lcl|c239816_g8_i3|m.26354
lcl|c216784_g1_i1|m.4762
lcl|c239835_g2_i1|m.26401
lcl|c239860_g1_i2|m.26443
lcl|c239860_g1_i1|m.26440
lcl|c239860_g1_i4|m.26447
lcl|c218302_g5_i1|m.5709
lcl|c215778_g6_i2|m.4198
lcl|c239956_g2_i4|m.26561
lcl|c240034_g1_i1|m.26673
lcl|c240071_g1_i3|m.26729
lcl|c240071_g1_i5|m.26730
lcl|c240077_g1_i1|m.26736
lcl|c240077_g1_i6|m.26741
lcl|c240077_g1_i9|m.26743
lcl|c240128_g3_i1|m.26827
lcl|c240158_g2_i1|m.26858
lcl|c240245_g2_i2|m.26954
lcl|c240253_g1_i1|m.26963
lcl|c244342_g1_i1|m.32068
lcl|c240259_g4_i3|m.26973
lcl|c240259_g4_i5|m.26974
lcl|c240264_g4_i5|m.26985
lcl|c215819_g3_i2|m.4218
lcl|c240297_g1_i2|m.27045
lcl|c240333_g1_i3|m.27087
lcl|c240370_g1_i1|m.27121
lcl|c240483_g2_i3|m.27310
lcl|c240483_g1_i8|m.27301
lcl|c240483_g1_i4|m.27290
lcl|c240483_g1_i3|m.27286
lcl|c240523_g1_i10|m.27367
lcl|c240612_g3_i13|m.27477
lcl|c240621_g3_i2|m.27488
lcl|c240699_g3_i15|m.27615
lcl|c240711_g1_i2|m.27634
lcl|c141061_g1_i1|m.229
lcl|c192621_g3_i1|m.866
lcl|c215838_g2_i1|m.4235
lcl|c240720_g1_i3|m.27662
lcl|c214670_g8_i2|m.3578
lcl|c206351_g3_i3|m.1527
lcl|c240732_g2_i2|m.27675
lcl|c240787_g1_i1|m.27744
lcl|c240852_g1_i3|m.27810
lcl|c232899_g1_i2|m.17887
lcl|c240887_g1_i1|m.27877
lcl|c240901_g2_i12|m.27918
lcl|c240948_g3_i3|m.27988
lcl|c241027_g2_i3|m.28090
lcl|c215924_g3_i1|m.4285
lcl|c241105_g3_i1|m.28176
lcl|c241105_g3_i4|m.28181
lcl|c241174_g2_i10|m.28286
lcl|c241242_g1_i1|m.28345
lcl|c241252_g2_i5|m.28366
lcl|c241254_g2_i1|m.28367
lcl|c241687_g2_i1|m.28855
lcl|c241763_g6_i2|m.28918
lcl|c215928_g3_i1|m.4293
lcl|c241792_g2_i3|m.28939
lcl|c241817_g1_i2|m.28964
lcl|c241817_g1_i5|m.28968
lcl|c241874_g1_i11|m.29053
lcl|c241874_g1_i1|m.29043
lcl|c241874_g1_i7|m.29076
lcl|c241874_g1_i1|m.29042
lcl|c241874_g1_i11|m.29054
lcl|c241874_g1_i1|m.29044
lcl|c241900_g1_i2|m.29120
lcl|c241916_g1_i7|m.29148
lcl|c242047_g5_i1|m.29305
lcl|c242362_g2_i1|m.29701
lcl|c242487_g1_i2|m.29847
lcl|c215957_g2_i1|m.4319
lcl|c242601_g4_i2|m.30017
lcl|c242633_g1_i1|m.30058
lcl|c242709_g1_i2|m.30167
lcl|c242755_g1_i3|m.30192
lcl|c242868_g4_i4|m.30303
lcl|c242872_g1_i1|m.30313
lcl|c243004_g1_i3|m.30514
lcl|c243059_g4_i3|m.30568
lcl|c216188_g2_i2|m.4423
lcl|c243099_g2_i7|m.30616
lcl|c243222_g3_i1|m.30722
lcl|c243269_g3_i1|m.30762
lcl|c243326_g1_i1|m.30823
lcl|c243357_g2_i4|m.30881
lcl|c243493_g3_i2|m.31028
lcl|c243591_g3_i1|m.31105
lcl|c243632_g1_i1|m.31156
lcl|c216194_g2_i1|m.4425
lcl|c243652_g1_i2|m.31190
lcl|c243813_g3_i2|m.31355
lcl|c244151_g1_i2|m.31813
lcl|c244343_g3_i1|m.32069
lcl|c244353_g1_i1|m.32081
lcl|c318732_g1_i1|m.32501
lcl|c270076_g1_i1|m.32416
lcl|c216201_g2_i1|m.4428
lcl|c214067_g1_i1|m.3351
lcl|c216289_g7_i1|m.4487
lcl|c216467_g8_i2|m.4597
lcl|c217363_g1_i6|m.5152
lcl|c218183_g4_i3|m.5602
lcl|c219122_g1_i1|m.6195
lcl|c219885_g1_i1|m.6625
lcl|c225511_g5_i8|m.10700
lcl|c226094_g1_i1|m.11204
lcl|c226303_g1_i2|m.11380
lcl|c227289_g1_i2|m.12316
lcl|c216308_g5_i4|m.4526
lcl|c233474_g3_i1|m.18592
lcl|c234999_g3_i3|m.20494
lcl|c236924_g5_i3|m.22694
lcl|c236955_g1_i6|m.22719
lcl|c194625_g1_i1|m.911
lcl|c216344_g6_i1|m.4547
lcl|c239334_g2_i2|m.25606
lcl|c240589_g2_i1|m.27450
lcl|c240624_g2_i1|m.27495
lcl|c240911_g1_i2|m.27934
lcl|c216422_g3_i2|m.4589
lcl|c78380_g1_i1|m.32668
lcl|c215848_g2_i7|m.4237
lcl|c216448_g1_i1|m.4592
lcl|c233603_g4_i1|m.18756
lcl|c241165_g4_i1|m.28268
lcl|c241734_g2_i3|m.28905
lcl|c216467_g10_i1|m.4595
lcl|c200829_g1_i1|m.1157
lcl|c221337_g4_i1|m.7577
lcl|c216467_g8_i1|m.4596
lcl|c228679_g8_i1|m.13528
lcl|c228768_g2_i2|m.13633
lcl|c231569_g1_i6|m.16419
lcl|c216506_g3_i1|m.4617
lcl|c233021_g5_i2|m.18047
lcl|c238302_g4_i1|m.24370
lcl|c216527_g1_i2|m.4625
lcl|c244194_g2_i1|m.31876
lcl|c216539_g3_i3|m.4633
lcl|c230412_g8_i4|m.15270
lcl|c235308_g1_i4|m.20801
lcl|c240068_g2_i2|m.26723
lcl|c185883_g1_i2|m.712
lcl|c216567_g2_i2|m.4643
lcl|c218000_g1_i5|m.5473
lcl|c235769_g9_i1|m.21325
lcl|c240035_g1_i1|m.26689
lcl|c242249_g1_i3|m.29549
lcl|c213912_g1_i5|m.3283
lcl|c195446_g1_i2|m.938
lcl|c216621_g3_i1|m.4676
lcl|c221711_g1_i1|m.7807
lcl|c229093_g1_i2|m.13957
lcl|c216650_g2_i1|m.4697
lcl|c233934_g1_i2|m.19213
lcl|c216655_g1_i1|m.4705
lcl|c226513_g6_i2|m.11548
lcl|c228778_g1_i1|m.13644
lcl|c230610_g4_i3|m.15445
lcl|c231825_g1_i2|m.16652
lcl|c234391_g1_i4|m.19790
lcl|c216702_g5_i1|m.4730
lcl|c243406_g1_i1|m.30946
lcl|c243675_g4_i3|m.31228
lcl|c220106_g1_i3|m.6753
lcl|c222533_g1_i1|m.8412
lcl|c222999_g2_i1|m.8783
lcl|c217202_g3_i1|m.5028
lcl|c222342_g2_i1|m.8256
lcl|c227073_g3_i1|m.12111
lcl|c206182_g1_i1|m.1515
lcl|c216848_g3_i4|m.4809
lcl|c223357_g4_i3|m.9060
lcl|c225637_g3_i2|m.10796
lcl|c234030_g1_i1|m.19351
lcl|c216861_g2_i3|m.4815
lcl|c221346_g3_i6|m.7581
lcl|c230890_g2_i1|m.15747
lcl|c228247_g2_i1|m.13162
lcl|c238725_g2_i10|m.24864
lcl|c216872_g3_i2|m.4822
lcl|c235430_g2_i10|m.20924
lcl|c236218_g9_i1|m.21856
lcl|c216899_g1_i1|m.4840
lcl|c229490_g1_i3|m.14303
lcl|c240578_g4_i1|m.27439
lcl|c198620_g1_i2|m.1049
lcl|c215741_g2_i3|m.4173
lcl|c216930_g11_i2|m.4850
lcl|c223823_g1_i1|m.9417
lcl|c216942_g4_i3|m.4860
lcl|c238153_g1_i1|m.24176
lcl|c241825_g1_i4|m.28980
lcl|c216953_g1_i3|m.4865
lcl|c212026_g1_i1|m.2607
lcl|c229166_g4_i2|m.14015
lcl|c216995_g9_i1|m.4890
lcl|c242869_g2_i4|m.30308
lcl|c210995_g1_i1|m.2321
lcl|c222542_g3_i2|m.8415
lcl|c225557_g1_i1|m.10731
lcl|c217005_g3_i1|m.4893
lcl|c244084_g2_i1|m.31725
lcl|c220294_g1_i11|m.6858
lcl|c221624_g3_i1|m.7766
lcl|c225365_g4_i1|m.10559
lcl|c217008_g4_i3|m.4896
lcl|c217792_g3_i1|m.5367
lcl|c217046_g2_i2|m.4921
lcl|c243491_g1_i1|m.31025
lcl|c220230_g1_i10|m.6831
lcl|c217146_g1_i1|m.4997
lcl|c231768_g1_i1|m.16601
lcl|c35802_g1_i1|m.32567
lcl|c221832_g4_i3|m.7892
lcl|c217195_g5_i2|m.5022
lcl|c198665_g3_i2|m.1050
lcl|c217198_g5_i5|m.5024
lcl|c217199_g3_i2|m.5026
lcl|c225947_g3_i1|m.11076
lcl|c221244_g1_i4|m.7506
lcl|c217447_g9_i5|m.5205
lcl|c221319_g3_i2|m.7559
lcl|c244381_g2_i1|m.32105
lcl|c217534_g1_i2|m.5231
lcl|c217573_g1_i1|m.5252
lcl|c230044_g4_i2|m.14887
lcl|c217576_g1_i1|m.5259
lcl|c242433_g1_i1|m.29789
lcl|c243527_g1_i1|m.31049
lcl|c229348_g1_i1|m.14183
lcl|c217621_g3_i1|m.5289
lcl|c217654_g5_i4|m.5303
lcl|c230669_g1_i1|m.15524
lcl|c242934_g1_i4|m.30427
lcl|c224166_g2_i1|m.9648
lcl|c236793_g3_i7|m.22527
lcl|c217701_g4_i1|m.5329
lcl|c226091_g2_i2|m.11200
lcl|c199545_g1_i1|m.1080
lcl|c242671_g2_i1|m.30114
lcl|c217737_g4_i4|m.5348
lcl|c217776_g2_i5|m.5358
lcl|c217777_g4_i6|m.5361
lcl|c217792_g3_i5|m.5368
lcl|c217808_g1_i5|m.5370
lcl|c217834_g1_i3|m.5399
lcl|c217887_g8_i2|m.5422
lcl|c217917_g2_i1|m.5431
lcl|c181783_g1_i1|m.659
lcl|c217972_g1_i6|m.5456
lcl|c227952_g2_i1|m.12918
lcl|c204003_g1_i4|m.1363
lcl|c199810_g1_i2|m.1089
lcl|c218032_g1_i1|m.5496
lcl|c213837_g2_i4|m.3221
lcl|c218043_g2_i3|m.5510
lcl|c218119_g1_i3|m.5570
lcl|c218123_g3_i2|m.5572
lcl|c240380_g1_i4|m.27156
lcl|c223455_g1_i2|m.9141
lcl|c213886_g9_i1|m.3273
lcl|c218175_g5_i2|m.5596
lcl|c234172_g3_i1|m.19574
lcl|c218197_g1_i1|m.5617
lcl|c218223_g3_i1|m.5642
lcl|c218374_g4_i1|m.5754
lcl|c218375_g1_i1|m.5756
lcl|c218445_g1_i1|m.5788
lcl|c201141_g1_i1|m.1178
lcl|c218481_g4_i6|m.5811
lcl|c241278_g2_i2|m.28378
lcl|c218494_g2_i5|m.5814
lcl|c218495_g1_i2|m.5815
lcl|c226055_g2_i1|m.11156
lcl|c221215_g1_i3|m.7483
lcl|c218580_g2_i1|m.5839
lcl|c218596_g3_i1|m.5846
lcl|c218603_g6_i5|m.5857
lcl|c218666_g4_i1|m.5893
lcl|c218696_g8_i2|m.5906
lcl|c218703_g1_i4|m.5907
lcl|c201155_g1_i1|m.1182
lcl|c218722_g1_i2|m.5914
lcl|c218748_g1_i1|m.5931
lcl|c218755_g2_i2|m.5948
lcl|c218789_g1_i2|m.5965
lcl|c218814_g3_i7|m.5970
lcl|c218840_g4_i1|m.5985
lcl|c240662_g2_i10|m.27558
lcl|c214951_g7_i1|m.3746
lcl|c218842_g3_i2|m.5986
lcl|c218842_g3_i2|m.5987
lcl|c218852_g5_i3|m.5993
lcl|c218872_g2_i3|m.6012
lcl|c219090_g4_i2|m.6185
lcl|c230386_g2_i1|m.15223
lcl|c219163_g1_i3|m.6242
lcl|c219184_g1_i2|m.6256
lcl|c219187_g1_i1|m.6258
lcl|c303715_g1_i1|m.32473
lcl|c219214_g1_i6|m.6280
lcl|c219220_g4_i4|m.6283
lcl|c219274_g1_i6|m.6313
lcl|c201413_g4_i1|m.1201
lcl|c219506_g5_i1|m.6423
lcl|c219564_g8_i2|m.6456
lcl|c219583_g2_i1|m.6468
lcl|c219601_g1_i1|m.6471
lcl|c219632_g2_i1|m.6493
lcl|c219636_g2_i1|m.6494
lcl|c219636_g2_i3|m.6495
lcl|c219659_g7_i1|m.6504
lcl|c217780_g1_i2|m.5363
lcl|c201696_g3_i1|m.1219
lcl|c219759_g3_i3|m.6556
lcl|c219828_g4_i5|m.6597
lcl|c219841_g6_i1|m.6610
lcl|c219842_g1_i1|m.6611
lcl|c219870_g5_i1|m.6620
lcl|c219901_g4_i1|m.6631
lcl|c219909_g1_i4|m.6633
lcl|c220008_g2_i5|m.6705
lcl|c220011_g4_i9|m.6707
lcl|c220050_g2_i1|m.6739
lcl|c220191_g1_i1|m.6799
lcl|c220226_g2_i9|m.6827
lcl|c220236_g4_i1|m.6833
lcl|c220252_g1_i3|m.6839
lcl|c220300_g3_i1|m.6859
lcl|c220319_g5_i1|m.6862
lcl|c220380_g1_i3|m.6911
lcl|c202641_g1_i1|m.1266
lcl|c220475_g1_i1|m.6962
lcl|c220485_g3_i1|m.6974
lcl|c220622_g1_i1|m.7032
lcl|c220638_g5_i1|m.7054
lcl|c220695_g1_i1|m.7091
lcl|c220748_g5_i2|m.7116
lcl|c220807_g2_i1|m.7165
lcl|c220831_g1_i1|m.7185
lcl|c202763_g1_i2|m.1275
lcl|c220834_g8_i2|m.7193
lcl|c220845_g6_i1|m.7197
lcl|c220863_g2_i3|m.7207
lcl|c220923_g2_i4|m.7240
lcl|c220937_g5_i7|m.7248
lcl|c220954_g1_i2|m.7267
lcl|c220963_g1_i1|m.7276
lcl|c221031_g2_i1|m.7336
lcl|c221039_g3_i2|m.7343
lcl|c203193_g1_i1|m.1308
lcl|c221077_g1_i1|m.7374
lcl|c221114_g2_i1|m.7405
lcl|c221130_g3_i2|m.7408
lcl|c221194_g2_i1|m.7463
lcl|c221205_g1_i1|m.7472
lcl|c221238_g1_i4|m.7502
lcl|c221281_g1_i1|m.7530
lcl|c221296_g1_i3|m.7550
lcl|c203735_g1_i1|m.1335
lcl|c221301_g3_i3|m.7552
lcl|c221340_g4_i1|m.7579
lcl|c221427_g1_i4|m.7617
lcl|c221450_g9_i6|m.7639
lcl|c221464_g1_i3|m.7656
lcl|c221482_g2_i1|m.7668
lcl|c221514_g6_i1|m.7698
lcl|c221548_g2_i3|m.7725
lcl|c221586_g4_i2|m.7745
lcl|c203808_g1_i1|m.1339
lcl|c221593_g3_i1|m.7753
lcl|c221619_g2_i1|m.7763
lcl|c221649_g6_i2|m.7773
lcl|c221662_g2_i4|m.7775
lcl|c221666_g1_i2|m.7778
lcl|c221694_g2_i1|m.7797
lcl|c221736_g1_i11|m.7820
lcl|c221739_g1_i1|m.7821
lcl|c221753_g3_i7|m.7844
lcl|c221849_g1_i2|m.7917
lcl|c204019_g1_i1|m.1366
lcl|c221855_g2_i3|m.7925
lcl|c221890_g1_i1|m.7971
lcl|c221925_g1_i3|m.7988
lcl|c221967_g2_i3|m.8016
lcl|c221968_g1_i1|m.8017
lcl|c221971_g3_i2|m.8022
lcl|c221999_g1_i4|m.8036
lcl|c222028_g1_i5|m.8060
lcl|c222117_g4_i1|m.8104
lcl|c222123_g3_i1|m.8109
lcl|c204436_g1_i1|m.1392
lcl|c222186_g2_i2|m.8151
lcl|c222196_g3_i1|m.8162
lcl|c222200_g1_i1|m.8165
lcl|c222286_g2_i1|m.8232
lcl|c222301_g1_i3|m.8235
lcl|c222306_g8_i4|m.8236
lcl|c145576_g1_i1|m.265
lcl|c204885_g2_i1|m.1407
lcl|c222319_g4_i3|m.8243
lcl|c222323_g2_i2|m.8244
lcl|c222323_g2_i2|m.8245
lcl|c222343_g4_i1|m.8262
lcl|c222353_g1_i1|m.8273
lcl|c222355_g2_i4|m.8274
lcl|c222377_g6_i1|m.8283
lcl|c222386_g1_i1|m.8298
lcl|c222400_g6_i5|m.8305
lcl|c222420_g3_i2|m.8319
lcl|c205012_g1_i1|m.1420
lcl|c222436_g10_i1|m.8337
lcl|c222484_g2_i1|m.8393
lcl|c222521_g8_i1|m.8406
lcl|c222526_g1_i2|m.8408
lcl|c222543_g3_i2|m.8418
lcl|c222548_g1_i3|m.8426
lcl|c222555_g2_i4|m.8428
lcl|c222581_g2_i12|m.8451
lcl|c222581_g2_i12|m.8452
lcl|c222653_g7_i1|m.8496
lcl|c222691_g4_i1|m.8535
lcl|c222693_g1_i1|m.8538
lcl|c222727_g3_i2|m.8582
lcl|c222750_g1_i9|m.8600
lcl|c222797_g7_i2|m.8616
lcl|c222808_g2_i2|m.8627
lcl|c222818_g1_i1|m.8630
lcl|c222837_g1_i1|m.8646
lcl|c222852_g4_i5|m.8661
lcl|c222909_g1_i1|m.8698
lcl|c222929_g2_i3|m.8717
lcl|c222937_g2_i3|m.8724
lcl|c222943_g1_i1|m.8725
lcl|c222943_g1_i2|m.8726
lcl|c222950_g5_i5|m.8735
lcl|c222957_g1_i2|m.8747
lcl|c205488_g1_i1|m.1464
lcl|c223077_g2_i1|m.8858
lcl|c223139_g3_i2|m.8898
lcl|c223205_g4_i1|m.8934
lcl|c223214_g1_i1|m.8951
lcl|c223247_g3_i6|m.8971
lcl|c223275_g1_i2|m.8992
lcl|c223317_g1_i2|m.9033
lcl|c223351_g1_i1|m.9046
lcl|c205554_g2_i2|m.1468
lcl|c223425_g3_i3|m.9106
lcl|c223433_g6_i1|m.9115
lcl|c223494_g6_i1|m.9164
lcl|c223597_g3_i2|m.9232
lcl|c223604_g1_i1|m.9235
lcl|c223616_g1_i1|m.9252
lcl|c223617_g5_i1|m.9254
lcl|c205697_g1_i1|m.1481
lcl|c223646_g1_i2|m.9273
lcl|c223689_g4_i1|m.9313
lcl|c223710_g5_i3|m.9324
lcl|c223716_g4_i1|m.9328
lcl|c223775_g7_i2|m.9373
lcl|c223798_g3_i1|m.9397
lcl|c223870_g1_i6|m.9447
lcl|c223887_g1_i1|m.9457
lcl|c205713_g1_i1|m.1484
lcl|c223971_g2_i1|m.9513
lcl|c223975_g3_i3|m.9516
lcl|c223983_g2_i8|m.9524
lcl|c223990_g2_i1|m.9532
lcl|c224015_g2_i1|m.9549
lcl|c224026_g2_i1|m.9560
lcl|c224026_g2_i4|m.9562
lcl|c224042_g7_i2|m.9570
lcl|c224156_g3_i2|m.9641
lcl|c206370_g1_i1|m.1531
lcl|c224182_g8_i1|m.9652
lcl|c224201_g3_i8|m.9658
lcl|c224242_g3_i7|m.9677
lcl|c224289_g1_i1|m.9705
lcl|c224332_g10_i1|m.9746
lcl|c224365_g3_i1|m.9762
lcl|c224371_g5_i1|m.9765
lcl|c224405_g1_i1|m.9772
lcl|c224432_g1_i4|m.9787
lcl|c206417_g1_i2|m.1538
lcl|c224457_g1_i1|m.9820
lcl|c224488_g1_i1|m.9847
lcl|c224493_g2_i5|m.9854
lcl|c224556_g6_i1|m.9931
lcl|c224557_g2_i1|m.9933
lcl|c224574_g1_i7|m.9961
lcl|c224589_g7_i1|m.9992
lcl|c224597_g3_i1|m.10003
lcl|c224670_g2_i1|m.10052
lcl|c160676_g1_i1|m.404
lcl|c206531_g1_i1|m.1558
lcl|c224672_g1_i1|m.10055
lcl|c224672_g2_i1|m.10058
lcl|c224781_g7_i2|m.10124
lcl|c224812_g3_i3|m.10152
lcl|c224848_g2_i1|m.10169
lcl|c224866_g1_i2|m.10191
lcl|c224880_g4_i1|m.10208
lcl|c224918_g1_i1|m.10239
lcl|c224998_g2_i2|m.10292
lcl|c206556_g1_i2|m.1565
lcl|c225015_g2_i1|m.10306
lcl|c225098_g3_i9|m.10362
lcl|c225144_g2_i3|m.10400
lcl|c225172_g3_i1|m.10424
lcl|c225266_g1_i7|m.10481
lcl|c225267_g2_i1|m.10483
lcl|c225281_g3_i2|m.10487
lcl|c225308_g1_i1|m.10501
lcl|c206819_g1_i1|m.1595
lcl|c225308_g1_i4|m.10503
lcl|c225323_g2_i2|m.10522
lcl|c225334_g2_i2|m.10532
lcl|c225352_g1_i1|m.10544
lcl|c225394_g4_i2|m.10584
lcl|c225544_g1_i2|m.10720
lcl|c225590_g2_i4|m.10752
lcl|c225618_g2_i6|m.10783
lcl|c207254_g1_i2|m.1628
lcl|c225632_g3_i1|m.10790
lcl|c225668_g5_i2|m.10809
lcl|c225713_g4_i1|m.10851
lcl|c225713_g4_i1|m.10853
lcl|c225755_g1_i1|m.10912
lcl|c225761_g6_i1|m.10925
lcl|c225774_g3_i6|m.10935
lcl|c225782_g2_i1|m.10939
lcl|c225822_g2_i4|m.10975
lcl|c207709_g1_i1|m.1673
lcl|c225829_g1_i1|m.10978
lcl|c225844_g2_i3|m.10984
lcl|c225849_g2_i3|m.10990
lcl|c225852_g2_i3|m.10992
lcl|c225867_g3_i1|m.11000
lcl|c225875_g4_i2|m.11006
lcl|c225884_g1_i1|m.11027
lcl|c225938_g3_i1|m.11067
lcl|c225972_g1_i1|m.11091
lcl|c207877_g2_i1|m.1696
lcl|c226005_g4_i1|m.11126
lcl|c226044_g1_i4|m.11148
lcl|c226046_g1_i2|m.11150
lcl|c226084_g3_i2|m.11194
lcl|c226099_g2_i1|m.11211
lcl|c226121_g5_i1|m.11230
lcl|c226127_g3_i4|m.11231
lcl|c226138_g2_i1|m.11236
lcl|c226155_g2_i3|m.11249
lcl|c226189_g2_i2|m.11277
lcl|c226211_g2_i1|m.11296
lcl|c226212_g1_i3|m.11297
lcl|c226216_g1_i2|m.11298
lcl|c226230_g2_i2|m.11305
lcl|c226287_g1_i1|m.11356
lcl|c207960_g1_i1|m.1712
lcl|c226287_g1_i2|m.11357
lcl|c226332_g1_i2|m.11417
lcl|c226346_g1_i1|m.11426
lcl|c226389_g3_i1|m.11454
lcl|c226409_g2_i1|m.11459
lcl|c226414_g3_i1|m.11460
lcl|c226450_g3_i4|m.11486
lcl|c226505_g3_i2|m.11536
lcl|c226593_g2_i1|m.11607
lcl|c226627_g2_i3|m.11631
lcl|c207967_g2_i1|m.1713
lcl|c226683_g4_i10|m.11705
lcl|c226723_g5_i2|m.11731
lcl|c226765_g1_i1|m.11762
lcl|c226774_g3_i2|m.11777
lcl|c226786_g3_i2|m.11789
lcl|c226846_g2_i3|m.11856
lcl|c226898_g4_i1|m.11913
lcl|c226904_g2_i1|m.11919
lcl|c226917_g1_i2|m.11940
lcl|c226971_g4_i11|m.11980
lcl|c226990_g1_i2|m.12024
lcl|c226999_g3_i5|m.12032
lcl|c227009_g2_i1|m.12051
lcl|c227063_g4_i1|m.12098
lcl|c227084_g3_i1|m.12128
lcl|c162537_g1_i2|m.418
lcl|c208317_g1_i1|m.1768
lcl|c227136_g2_i8|m.12192
lcl|c227186_g4_i4|m.12220
lcl|c227188_g1_i1|m.12222
lcl|c227202_g1_i3|m.12234
lcl|c227266_g1_i1|m.12288
lcl|c227267_g3_i2|m.12289
lcl|c227270_g10_i4|m.12291
lcl|c227289_g1_i2|m.12315
lcl|c227290_g1_i5|m.12317
lcl|c227293_g2_i4|m.12320
lcl|c208387_g1_i1|m.1778
lcl|c227297_g1_i3|m.12321
lcl|c227361_g2_i9|m.12363
lcl|c227365_g1_i1|m.12366
lcl|c227372_g6_i3|m.12377
lcl|c227396_g2_i4|m.12400
lcl|c227414_g2_i1|m.12410
lcl|c227531_g4_i11|m.12520
lcl|c227533_g4_i2|m.12539
lcl|c227543_g1_i1|m.12562
lcl|c208684_g1_i2|m.1827
lcl|c227543_g1_i4|m.12563
lcl|c227548_g3_i11|m.12568
lcl|c227571_g1_i1|m.12592
lcl|c227657_g3_i1|m.12650
lcl|c227676_g2_i3|m.12666
lcl|c227702_g4_i1|m.12691
lcl|c227720_g2_i2|m.12706
lcl|c227721_g2_i2|m.12707
lcl|c208691_g4_i1|m.1828
lcl|c227726_g1_i1|m.12708
lcl|c227735_g3_i4|m.12716
lcl|c227738_g1_i4|m.12717
lcl|c227772_g1_i1|m.12754
lcl|c227794_g1_i1|m.12770
lcl|c227847_g4_i2|m.12829
lcl|c227852_g1_i7|m.12835
lcl|c227928_g3_i2|m.12899
lcl|c208878_g1_i2|m.1846
lcl|c227963_g7_i1|m.12929
lcl|c227969_g2_i1|m.12933
lcl|c227969_g5_i2|m.12934
lcl|c228029_g3_i2|m.12983
lcl|c228038_g3_i1|m.12994
lcl|c228056_g1_i4|m.13006
lcl|c228109_g2_i1|m.13051
lcl|c228121_g2_i2|m.13058
lcl|c208940_g4_i1|m.1863
lcl|c228151_g1_i2|m.13084
lcl|c228205_g4_i2|m.13127
lcl|c228207_g1_i1|m.13128
lcl|c228314_g1_i1|m.13228
lcl|c228317_g4_i1|m.13231
lcl|c228325_g7_i1|m.13245
lcl|c228330_g5_i1|m.13250
lcl|c228331_g1_i1|m.13257
lcl|c228374_g2_i1|m.13291
lcl|c228380_g1_i2|m.13296
lcl|c209114_g1_i1|m.1902
lcl|c228390_g1_i2|m.13299
lcl|c228456_g2_i1|m.13345
lcl|c228461_g1_i2|m.13347
lcl|c228506_g1_i2|m.13379
lcl|c228524_g1_i1|m.13396
lcl|c228529_g1_i1|m.13404
lcl|c228583_g3_i2|m.13440
lcl|c228583_g6_i1|m.13441
lcl|c228611_g1_i2|m.13461
lcl|c209191_g2_i1|m.1916
lcl|c228611_g7_i1|m.13463
lcl|c228623_g6_i3|m.13470
lcl|c228665_g3_i2|m.13504
lcl|c228709_g4_i2|m.13577
lcl|c228742_g3_i1|m.13609
lcl|c228773_g1_i1|m.13638
lcl|c228789_g1_i1|m.13647
lcl|c228825_g1_i1|m.13684
lcl|c209256_g1_i1|m.1929
lcl|c228838_g1_i2|m.13701
lcl|c228847_g1_i2|m.13712
lcl|c228864_g3_i2|m.13732
lcl|c228868_g10_i1|m.13735
lcl|c228869_g1_i2|m.13736
lcl|c228886_g2_i3|m.13746
lcl|c228904_g1_i5|m.13760
lcl|c228908_g5_i3|m.13768
lcl|c228926_g1_i1|m.13795
lcl|c228940_g3_i1|m.13807
lcl|c209298_g1_i1|m.1944
lcl|c228955_g3_i2|m.13813
lcl|c228984_g1_i2|m.13846
lcl|c229021_g1_i1|m.13887
lcl|c229025_g3_i1|m.13888
lcl|c229032_g2_i1|m.13894
lcl|c229032_g2_i3|m.13895
lcl|c229032_g2_i5|m.13896
lcl|c229041_g1_i1|m.13901
lcl|c163027_g1_i3|m.422
lcl|c209326_g4_i1|m.1952
lcl|c229055_g1_i1|m.13922
lcl|c229109_g1_i2|m.13969
lcl|c229207_g3_i3|m.14046
lcl|c229261_g2_i4|m.14109
lcl|c229298_g2_i1|m.14136
lcl|c229310_g3_i5|m.14142
lcl|c229310_g3_i5|m.14143
lcl|c209385_g1_i1|m.1957
lcl|c229351_g6_i1|m.14197
lcl|c229422_g1_i2|m.14250
lcl|c229422_g1_i9|m.14251
lcl|c229426_g2_i2|m.14255
lcl|c229426_g2_i4|m.14256
lcl|c229445_g3_i3|m.14271
lcl|c229460_g5_i1|m.14276
lcl|c229461_g3_i2|m.14279
lcl|c209492_g1_i1|m.1979
lcl|c229482_g2_i3|m.14286
lcl|c229532_g3_i4|m.14360
lcl|c229534_g2_i1|m.14362
lcl|c229541_g1_i10|m.14378
lcl|c229541_g1_i10|m.14379
lcl|c229550_g1_i3|m.14392
lcl|c229563_g2_i2|m.14411
lcl|c229579_g3_i1|m.14426
lcl|c229592_g3_i11|m.14442
lcl|c209513_g1_i2|m.1987
lcl|c229658_g3_i1|m.14486
lcl|c229667_g6_i8|m.14511
lcl|c229676_g1_i1|m.14524
lcl|c229735_g7_i1|m.14573
lcl|c229802_g6_i5|m.14639
lcl|c229808_g3_i3|m.14640
lcl|c229833_g1_i3|m.14669
lcl|c229853_g1_i1|m.14683
lcl|c229881_g6_i6|m.14719
lcl|c229904_g1_i2|m.14752
lcl|c229913_g3_i1|m.14763
lcl|c229917_g4_i4|m.14770
lcl|c229939_g1_i1|m.14795
lcl|c230000_g8_i2|m.14843
lcl|c230026_g4_i1|m.14873
lcl|c209565_g1_i2|m.1999
lcl|c230032_g6_i1|m.14874
lcl|c230034_g1_i1|m.14877
lcl|c230065_g1_i2|m.14908
lcl|c230110_g2_i2|m.14961
lcl|c230136_g1_i1|m.14983
lcl|c230163_g1_i1|m.15005
lcl|c230171_g1_i1|m.15015
lcl|c230175_g2_i2|m.15021
lcl|c230178_g1_i2|m.15028
lcl|c209565_g1_i2|m.2000
lcl|c230184_g2_i3|m.15031
lcl|c230192_g3_i5|m.15041
lcl|c230197_g3_i5|m.15044
lcl|c230296_g1_i1|m.15135
lcl|c230355_g4_i3|m.15198
lcl|c230406_g3_i1|m.15260
lcl|c230411_g4_i1|m.15261
lcl|c230414_g1_i1|m.15275
lcl|c209664_g1_i1|m.2022
lcl|c230632_g1_i6|m.15498
lcl|c230758_g1_i1|m.15596
lcl|c230771_g2_i1|m.15607
lcl|c230862_g3_i1|m.15714
lcl|c230890_g3_i2|m.15750
lcl|c209757_g1_i1|m.2044
lcl|c230960_g1_i5|m.15839
lcl|c231052_g3_i3|m.15929
lcl|c231068_g6_i2|m.15939
lcl|c231085_g3_i1|m.15955
lcl|c231225_g3_i3|m.16055
lcl|c231252_g2_i1|m.16075
lcl|c209846_g4_i1|m.2055
lcl|c231281_g6_i3|m.16097
lcl|c231364_g6_i1|m.16162
lcl|c231378_g1_i2|m.16165
lcl|c231445_g1_i1|m.16259
lcl|c231460_g1_i4|m.16283
lcl|c231462_g1_i10|m.16284
lcl|c231601_g3_i1|m.16437
lcl|c164490_g1_i1|m.440
lcl|c210226_g1_i1|m.2139
lcl|c231621_g3_i3|m.16453
lcl|c231694_g3_i2|m.16524
lcl|c231698_g2_i1|m.16532
lcl|c231732_g6_i1|m.16569
lcl|c231737_g1_i3|m.16576
lcl|c231739_g1_i3|m.16580
lcl|c231789_g3_i2|m.16623
lcl|c231808_g9_i1|m.16644
lcl|c210228_g3_i1|m.2141
lcl|c231821_g3_i1|m.16651
lcl|c231826_g8_i1|m.16654
lcl|c231881_g1_i2|m.16748
lcl|c231884_g4_i1|m.16750
lcl|c231891_g1_i1|m.16759
lcl|c231904_g1_i7|m.16777
lcl|c231929_g5_i4|m.16789
lcl|c231931_g2_i1|m.16792
lcl|c231967_g1_i2|m.16842
lcl|c231976_g1_i1|m.16853
lcl|c231981_g4_i6|m.16864
lcl|c231996_g3_i3|m.16899
lcl|c231997_g2_i3|m.16900
lcl|c232008_g1_i2|m.16909
lcl|c232095_g2_i1|m.16982
lcl|c232105_g3_i1|m.16994
lcl|c232108_g1_i1|m.16997
lcl|c232108_g1_i2|m.16999
lcl|c210230_g1_i1|m.2146
lcl|c232133_g1_i5|m.17039
lcl|c232137_g2_i1|m.17041
lcl|c232215_g4_i2|m.17149
lcl|c232221_g3_i2|m.17155
lcl|c232232_g4_i1|m.17169
lcl|c232241_g6_i1|m.17171
lcl|c232241_g6_i3|m.17173
lcl|c232242_g3_i1|m.17174
lcl|c232294_g5_i11|m.17226
lcl|c232294_g5_i11|m.17227
lcl|c210331_g2_i2|m.2158
lcl|c232338_g2_i2|m.17255
lcl|c232350_g3_i1|m.17265
lcl|c232381_g2_i3|m.17311
lcl|c232401_g7_i2|m.17338
lcl|c232410_g1_i2|m.17346
lcl|c232424_g1_i6|m.17358
lcl|c232440_g3_i1|m.17372
lcl|c232521_g1_i4|m.17458
lcl|c210338_g2_i1|m.2161
lcl|c232540_g2_i1|m.17495
lcl|c232541_g3_i1|m.17498
lcl|c232555_g1_i2|m.17516
lcl|c232638_g9_i1|m.17634
lcl|c232653_g3_i1|m.17643
lcl|c232676_g1_i2|m.17666
lcl|c232684_g7_i2|m.17670
lcl|c210342_g3_i4|m.2163
lcl|c232684_g7_i4|m.17671
lcl|c232692_g3_i1|m.17680
lcl|c232716_g1_i2|m.17708
lcl|c232736_g7_i11|m.17724
lcl|c232744_g5_i2|m.17733
lcl|c232769_g4_i2|m.17751
lcl|c232783_g1_i1|m.17764
lcl|c210398_g1_i3|m.2174
lcl|c232791_g2_i3|m.17780
lcl|c232813_g1_i6|m.17800
lcl|c232813_g3_i2|m.17801
lcl|c232821_g1_i1|m.17807
lcl|c232834_g2_i9|m.17824
lcl|c232842_g1_i1|m.17827
lcl|c232847_g2_i2|m.17831
lcl|c232847_g6_i1|m.17834
lcl|c210433_g2_i1|m.2180
lcl|c232854_g3_i11|m.17840
lcl|c232949_g3_i7|m.17939
lcl|c232983_g2_i2|m.17991
lcl|c232986_g1_i4|m.17993
lcl|c233001_g2_i4|m.18006
lcl|c233014_g2_i1|m.18039
lcl|c233033_g3_i4|m.18064
lcl|c233042_g5_i1|m.18070
lcl|c233068_g2_i1|m.18098
lcl|c233068_g2_i3|m.18101
lcl|c233135_g1_i3|m.18177
lcl|c233142_g2_i1|m.18198
lcl|c233156_g1_i1|m.18213
lcl|c233181_g4_i3|m.18256
lcl|c233212_g2_i5|m.18273
lcl|c233212_g2_i6|m.18275
lcl|c167783_g1_i1|m.480
lcl|c210579_g1_i2|m.2209
lcl|c233247_g1_i1|m.18311
lcl|c233287_g2_i1|m.18368
lcl|c233339_g2_i12|m.18429
lcl|c233348_g2_i1|m.18445
lcl|c233370_g1_i2|m.18468
lcl|c233425_g3_i4|m.18529
lcl|c233431_g1_i6|m.18546
lcl|c233449_g1_i1|m.18576
lcl|c233502_g5_i1|m.18630
lcl|c233521_g3_i3|m.18674
lcl|c210580_g1_i3|m.2210
lcl|c233547_g3_i1|m.18698
lcl|c233547_g4_i3|m.18699
lcl|c233552_g1_i1|m.18704
lcl|c233577_g2_i4|m.18732
lcl|c233583_g1_i1|m.18736
lcl|c233583_g1_i3|m.18737
lcl|c233588_g6_i3|m.18739
lcl|c233596_g1_i1|m.18749
lcl|c233626_g4_i1|m.18797
lcl|c233647_g1_i1|m.18818
lcl|c233650_g1_i7|m.18822
lcl|c233679_g3_i13|m.18855
lcl|c233702_g11_i7|m.18877
lcl|c233739_g1_i1|m.18926
lcl|c233739_g3_i1|m.18931
lcl|c233761_g2_i1|m.18976
lcl|c233766_g4_i1|m.18988
lcl|c233811_g4_i2|m.19026
lcl|c210662_g1_i1|m.2231
lcl|c233818_g2_i6|m.19032
lcl|c233873_g4_i1|m.19119
lcl|c233954_g6_i2|m.19250
lcl|c233968_g2_i12|m.19271
lcl|c233968_g6_i1|m.19272
lcl|c234004_g4_i3|m.19315
lcl|c234022_g3_i1|m.19345
lcl|c234041_g5_i1|m.19364
lcl|c234054_g3_i2|m.19385
lcl|c234060_g2_i2|m.19387
lcl|c234075_g1_i1|m.19400
lcl|c234140_g5_i2|m.19531
lcl|c234226_g1_i1|m.19634
lcl|c234277_g5_i1|m.19677
lcl|c234322_g7_i1|m.19718
lcl|c234352_g2_i1|m.19757
lcl|c234439_g3_i1|m.19847
lcl|c234446_g3_i2|m.19850
lcl|c210735_g5_i3|m.2260
lcl|c234511_g2_i1|m.19914
lcl|c234639_g1_i1|m.20058
lcl|c234657_g3_i4|m.20097
lcl|c234664_g2_i4|m.20106
lcl|c234705_g1_i1|m.20159
lcl|c234712_g2_i1|m.20167
lcl|c234733_g4_i1|m.20188
lcl|c234738_g1_i1|m.20193
lcl|c234738_g1_i3|m.20194
lcl|c210749_g1_i1|m.2273
lcl|c234788_g2_i3|m.20258
lcl|c234789_g3_i1|m.20259
lcl|c234877_g1_i1|m.20373
lcl|c234891_g1_i3|m.20389
lcl|c234934_g3_i3|m.20432
lcl|c235036_g1_i1|m.20514
lcl|c235079_g5_i3|m.20543
lcl|c210957_g4_i1|m.2306
lcl|c235095_g3_i4|m.20556
lcl|c235126_g4_i1|m.20601
lcl|c235184_g7_i1|m.20675
lcl|c235213_g4_i11|m.20710
lcl|c235239_g6_i4|m.20736
lcl|c235240_g3_i2|m.20738
lcl|c235294_g4_i1|m.20789
lcl|c210994_g1_i1|m.2320
lcl|c235326_g4_i1|m.20819
lcl|c235389_g5_i2|m.20890
lcl|c235399_g7_i4|m.20891
lcl|c235441_g4_i6|m.20931
lcl|c235481_g2_i1|m.20956
lcl|c235526_g4_i1|m.21004
lcl|c235585_g2_i7|m.21110
lcl|c235619_g2_i4|m.21138
lcl|c235627_g4_i5|m.21151
lcl|c211030_g1_i1|m.2329
lcl|c235649_g2_i5|m.21175
lcl|c235651_g1_i2|m.21178
lcl|c235663_g1_i3|m.21185
lcl|c235690_g8_i1|m.21219
lcl|c235712_g3_i3|m.21245
lcl|c235722_g2_i1|m.21267
lcl|c235743_g4_i1|m.21296
lcl|c235757_g3_i5|m.21305
lcl|c235769_g7_i2|m.21324

## Sheet: C_Proteins_T2.R
Protein
lcl|c169761_g1_i1|m.505
lcl|c211238_g1_i1|m.2379
lcl|c235791_g2_i8|m.21336
lcl|c235847_g2_i10|m.21377
lcl|c235850_g2_i3|m.21382
lcl|c235861_g2_i5|m.21394
lcl|c235937_g3_i1|m.21493
lcl|c235959_g6_i1|m.21503
lcl|c235993_g2_i2|m.21545
lcl|c236015_g2_i16|m.21586
lcl|c236024_g3_i2|m.21588
lcl|c236035_g1_i2|m.21599
lcl|c236073_g1_i1|m.21645
lcl|c236101_g5_i2|m.21702
lcl|c236120_g2_i1|m.21731
lcl|c236131_g3_i3|m.21740
lcl|c236134_g1_i2|m.21741
lcl|c236135_g4_i5|m.21746
lcl|c236181_g1_i10|m.21802
lcl|c236181_g1_i2|m.21806
lcl|c211368_g3_i1|m.2426
lcl|c236286_g4_i1|m.21959
lcl|c236351_g2_i1|m.22019
lcl|c236389_g1_i1|m.22061
lcl|c236415_g5_i1|m.22087
lcl|c236416_g2_i2|m.22088
lcl|c236507_g1_i5|m.22184
lcl|c236507_g1_i6|m.22186
lcl|c236523_g2_i4|m.22204
lcl|c211415_g1_i1|m.2432
lcl|c236527_g2_i1|m.22205
lcl|c236562_g3_i1|m.22244
lcl|c236655_g1_i2|m.22362
lcl|c236666_g2_i2|m.22384
lcl|c236706_g2_i4|m.22417
lcl|c236734_g2_i3|m.22454
lcl|c236813_g3_i2|m.22564
lcl|c236822_g3_i10|m.22574
lcl|c236844_g2_i5|m.22607
lcl|c211436_g1_i2|m.2434
lcl|c236878_g1_i2|m.22651
lcl|c236923_g1_i10|m.22692
lcl|c237097_g2_i1|m.22905
lcl|c237098_g1_i2|m.22911
lcl|c237130_g1_i4|m.22955
lcl|c237136_g1_i1|m.22958
lcl|c237136_g3_i1|m.22962
lcl|c237191_g2_i5|m.23010
lcl|c211551_g6_i4|m.2453
lcl|c237207_g2_i2|m.23024
lcl|c237211_g6_i4|m.23025
lcl|c237215_g1_i1|m.23031
lcl|c237256_g2_i1|m.23076
lcl|c237320_g5_i2|m.23157
lcl|c237325_g2_i1|m.23163
lcl|c237387_g1_i1|m.23217
lcl|c237405_g1_i2|m.23236
lcl|c237440_g3_i2|m.23273
lcl|c211553_g1_i1|m.2455
lcl|c237490_g5_i6|m.23318
lcl|c237560_g2_i1|m.23397
lcl|c237587_g5_i1|m.23455
lcl|c237591_g3_i1|m.23457
lcl|c237591_g3_i4|m.23458
lcl|c237613_g1_i3|m.23496
lcl|c237643_g4_i5|m.23533
lcl|c211563_g8_i2|m.2460
lcl|c237702_g1_i1|m.23627
lcl|c237753_g2_i2|m.23709
lcl|c237832_g1_i6|m.23803
lcl|c237887_g2_i1|m.23860
lcl|c237891_g2_i2|m.23861
lcl|c237894_g6_i1|m.23869
lcl|c237953_g4_i1|m.23928
lcl|c237969_g1_i5|m.23942
lcl|c211604_g1_i1|m.2470
lcl|c238048_g5_i2|m.24043
lcl|c238052_g1_i4|m.24050
lcl|c238085_g2_i5|m.24082
lcl|c238115_g2_i1|m.24111
lcl|c238173_g3_i3|m.24203
lcl|c238175_g2_i3|m.24204
lcl|c238196_g2_i3|m.24232
lcl|c238200_g3_i4|m.24238
lcl|c238338_g4_i1|m.24403
lcl|c211615_g1_i2|m.2471
lcl|c238340_g1_i7|m.24404
lcl|c238365_g3_i1|m.24425
lcl|c238372_g5_i2|m.24429
lcl|c238378_g1_i1|m.24441
lcl|c238385_g2_i1|m.24454
lcl|c238409_g2_i5|m.24505
lcl|c238410_g2_i3|m.24507
lcl|c238476_g3_i5|m.24565
lcl|c238499_g4_i2|m.24591
lcl|c238537_g2_i7|m.24631
lcl|c176627_g1_i2|m.576
lcl|c211660_g1_i1|m.2486
lcl|c238545_g4_i3|m.24636
lcl|c238560_g5_i2|m.24666
lcl|c238572_g3_i3|m.24677
lcl|c238581_g1_i1|m.24692
lcl|c238591_g4_i10|m.24704
lcl|c238657_g1_i1|m.24764
lcl|c238662_g3_i1|m.24774
lcl|c238663_g1_i2|m.24780
lcl|c238664_g1_i2|m.24781
lcl|c238677_g1_i1|m.24810
lcl|c238733_g2_i2|m.24867
lcl|c238738_g2_i3|m.24871
lcl|c238756_g1_i5|m.24891
lcl|c238756_g1_i5|m.24892
lcl|c238814_g3_i2|m.24928
lcl|c238826_g2_i1|m.24957
lcl|c238833_g1_i2|m.24965
lcl|c211774_g2_i1|m.2538
lcl|c238903_g3_i2|m.25053
lcl|c239007_g1_i1|m.25175
lcl|c239029_g3_i1|m.25195
lcl|c239101_g4_i2|m.25293
lcl|c239132_g4_i1|m.25330
lcl|c239139_g1_i2|m.25341
lcl|c239139_g1_i7|m.25343
lcl|c239148_g1_i1|m.25358
lcl|c239269_g3_i1|m.25540
lcl|c239272_g3_i1|m.25542
lcl|c211861_g1_i1|m.2554
lcl|c239275_g1_i1|m.25549
lcl|c239283_g1_i2|m.25559
lcl|c239343_g4_i4|m.25612
lcl|c239381_g2_i1|m.25706
lcl|c239392_g1_i1|m.25726
lcl|c239406_g1_i2|m.25742
lcl|c239409_g1_i2|m.25747
lcl|c239444_g1_i9|m.25795
lcl|c211914_g5_i4|m.2567
lcl|c239496_g4_i3|m.25878
lcl|c239497_g2_i3|m.25879
lcl|c239561_g1_i2|m.25969
lcl|c239610_g1_i3|m.26053
lcl|c239652_g2_i1|m.26096
lcl|c239662_g2_i17|m.26116
lcl|c239670_g2_i1|m.26141
lcl|c239673_g1_i3|m.26150
lcl|c239684_g3_i6|m.26167
lcl|c239719_g1_i1|m.26241
lcl|c239813_g5_i1|m.26346
lcl|c239883_g8_i2|m.26469
lcl|c239887_g1_i1|m.26471
lcl|c239893_g3_i11|m.26489
lcl|c239893_g3_i11|m.26493
lcl|c239894_g3_i2|m.26508
lcl|c239962_g2_i3|m.26573
lcl|c212026_g3_i1|m.2608
lcl|c239963_g4_i3|m.26575
lcl|c240014_g2_i1|m.26649
lcl|c240053_g2_i1|m.26700
lcl|c240104_g7_i1|m.26774
lcl|c240121_g3_i1|m.26818
lcl|c240175_g3_i1|m.26871
lcl|c240175_g3_i1|m.26872
lcl|c240251_g4_i1|m.26961
lcl|c240254_g2_i3|m.26966
lcl|c212126_g1_i2|m.2626
lcl|c240260_g2_i7|m.26976
lcl|c240274_g5_i1|m.26994
lcl|c240300_g3_i7|m.27053
lcl|c240300_g3_i7|m.27054
lcl|c240327_g5_i1|m.27085
lcl|c240357_g2_i2|m.27113
lcl|c240440_g6_i6|m.27259
lcl|c240476_g1_i3|m.27281
lcl|c212208_g2_i4|m.2650
lcl|c240483_g2_i2|m.27308
lcl|c240488_g1_i6|m.27324
lcl|c240532_g3_i2|m.27393
lcl|c240624_g3_i1|m.27496
lcl|c240628_g3_i3|m.27511
lcl|c240630_g1_i1|m.27515
lcl|c240640_g2_i1|m.27531
lcl|c240688_g3_i1|m.27609
lcl|c240709_g1_i1|m.27629
lcl|c240739_g2_i5|m.27680
lcl|c212237_g2_i1|m.2659
lcl|c240749_g2_i2|m.27696
lcl|c240761_g2_i10|m.27710
lcl|c240794_g1_i2|m.27749
lcl|c240794_g1_i3|m.27750
lcl|c240833_g3_i3|m.27779
lcl|c240857_g5_i1|m.27819
lcl|c240877_g2_i2|m.27858
lcl|c240904_g2_i1|m.27923
lcl|c240989_g2_i1|m.28022
lcl|c241031_g1_i1|m.28098
lcl|c176630_g1_i1|m.578
lcl|c212248_g3_i1|m.2663
lcl|c241047_g4_i1|m.28118
lcl|c241090_g1_i1|m.28152
lcl|c241114_g1_i2|m.28195
lcl|c241148_g1_i6|m.28240
lcl|c241192_g1_i4|m.28299
lcl|c241194_g4_i1|m.28300
lcl|c241197_g1_i1|m.28305
lcl|c241220_g4_i2|m.28322
lcl|c241222_g2_i5|m.28326
lcl|c241251_g1_i1|m.28362
lcl|c212462_g1_i1|m.2727
lcl|c241269_g1_i2|m.28376
lcl|c241299_g1_i6|m.28386
lcl|c241317_g4_i3|m.28425
lcl|c241317_g4_i4|m.28427
lcl|c241349_g1_i1|m.28471
lcl|c241359_g3_i12|m.28482
lcl|c241389_g1_i2|m.28515
lcl|c241409_g1_i4|m.28539
lcl|c212602_g3_i5|m.2781
lcl|c241444_g1_i2|m.28576
lcl|c241466_g2_i10|m.28615
lcl|c241498_g6_i2|m.28662
lcl|c241500_g1_i1|m.28663
lcl|c241502_g2_i1|m.28666
lcl|c241516_g1_i3|m.28672
lcl|c241579_g2_i1|m.28728
lcl|c241579_g2_i3|m.28729
lcl|c241608_g1_i1|m.28761
lcl|c212652_g1_i3|m.2790
lcl|c241608_g2_i1|m.28762
lcl|c241649_g4_i1|m.28823
lcl|c241650_g2_i3|m.28826
lcl|c241754_g2_i1|m.28913
lcl|c241824_g2_i8|m.28976
lcl|c241824_g2_i8|m.28977
lcl|c241854_g3_i2|m.29002
lcl|c241873_g2_i3|m.29039
lcl|c212693_g1_i1|m.2804
lcl|c241909_g1_i6|m.29130
lcl|c241909_g2_i2|m.29132
lcl|c241909_g2_i3|m.29133
lcl|c241916_g1_i1|m.29146
lcl|c241966_g1_i1|m.29199
lcl|c241966_g1_i2|m.29201
lcl|c242001_g1_i2|m.29236
lcl|c242066_g1_i1|m.29327
lcl|c242066_g1_i1|m.29328
lcl|c212713_g4_i1|m.2814
lcl|c242089_g1_i1|m.29373
lcl|c242092_g2_i3|m.29375
lcl|c242139_g4_i2|m.29446
lcl|c242185_g2_i2|m.29491
lcl|c242193_g2_i1|m.29501
lcl|c242257_g2_i2|m.29551
lcl|c242277_g7_i2|m.29564
lcl|c242362_g2_i1|m.29700
lcl|c212727_g5_i1|m.2822
lcl|c242373_g3_i2|m.29725
lcl|c242381_g1_i1|m.29746
lcl|c242419_g1_i1|m.29781
lcl|c242499_g1_i3|m.29884
lcl|c242527_g2_i1|m.29909
lcl|c242541_g2_i5|m.29922
lcl|c242561_g4_i1|m.29954
lcl|c242581_g1_i1|m.29984
lcl|c242594_g2_i1|m.30002
lcl|c242618_g2_i3|m.30039
lcl|c242644_g1_i1|m.30082
lcl|c242743_g1_i1|m.30188
lcl|c242793_g1_i1|m.30226
lcl|c242793_g1_i1|m.30227
lcl|c242803_g1_i3|m.30250
lcl|c242839_g1_i1|m.30267
lcl|c212821_g1_i2|m.2859
lcl|c242839_g1_i1|m.30268
lcl|c242839_g1_i1|m.30269
lcl|c242855_g1_i2|m.30293
lcl|c242878_g1_i4|m.30326
lcl|c242894_g3_i1|m.30343
lcl|c242924_g1_i1|m.30399
lcl|c242974_g2_i1|m.30459
lcl|c212826_g3_i1|m.2861
lcl|c243004_g1_i1|m.30509
lcl|c243010_g3_i1|m.30515
lcl|c243015_g1_i1|m.30516
lcl|c243045_g1_i1|m.30553
lcl|c243085_g1_i3|m.30591
lcl|c243086_g4_i2|m.30593
lcl|c243097_g5_i3|m.30604
lcl|c243117_g1_i1|m.30639
lcl|c179773_g1_i1|m.636
lcl|c212912_g1_i1|m.2890
lcl|c243136_g1_i1|m.30659
lcl|c243149_g1_i2|m.30670
lcl|c243154_g1_i1|m.30688
lcl|c243228_g1_i1|m.30729
lcl|c243308_g5_i1|m.30798
lcl|c243349_g1_i4|m.30872
lcl|c243371_g1_i1|m.30909
lcl|c243397_g1_i1|m.30938
lcl|c243413_g2_i1|m.30960
lcl|c243429_g2_i2|m.30976
lcl|c212937_g3_i2|m.2900
lcl|c243503_g5_i1|m.31038
lcl|c243506_g1_i6|m.31041
lcl|c243516_g2_i1|m.31047
lcl|c243541_g3_i2|m.31058
lcl|c243554_g1_i5|m.31071
lcl|c243578_g4_i1|m.31087
lcl|c243614_g4_i2|m.31123
lcl|c243628_g3_i2|m.31151
lcl|c243633_g2_i1|m.31165
lcl|c243633_g2_i1|m.31166
lcl|c212963_g1_i1|m.2911
lcl|c243654_g1_i2|m.31195
lcl|c243654_g1_i2|m.31196
lcl|c243671_g5_i1|m.31222
lcl|c243724_g1_i1|m.31250
lcl|c243765_g1_i1|m.31282
lcl|c243774_g1_i2|m.31291
lcl|c243791_g1_i1|m.31323
lcl|c213022_g4_i5|m.2921
lcl|c243799_g1_i1|m.31328
lcl|c243884_g3_i1|m.31457
lcl|c243893_g1_i1|m.31474
lcl|c243905_g1_i1|m.31490
lcl|c243909_g1_i1|m.31505
lcl|c243935_g1_i3|m.31546
lcl|c243938_g2_i1|m.31548
lcl|c243954_g3_i1|m.31569
lcl|c213072_g1_i1|m.2941
lcl|c243966_g1_i2|m.31591
lcl|c244055_g1_i3|m.31694
lcl|c244084_g2_i1|m.31724
lcl|c244126_g1_i2|m.31771
lcl|c244145_g1_i1|m.31801
lcl|c244164_g1_i1|m.31837
lcl|c244169_g2_i1|m.31846
lcl|c244173_g1_i4|m.31852
lcl|c244176_g3_i1|m.31854
lcl|c213117_g1_i3|m.2966
lcl|c244197_g2_i1|m.31877
lcl|c244235_g1_i2|m.31919
lcl|c244249_g2_i1|m.31932
lcl|c244255_g3_i1|m.31943
lcl|c244259_g1_i1|m.31949
lcl|c244264_g3_i1|m.31952
lcl|c244278_g1_i1|m.31973
lcl|c244304_g2_i1|m.32002
lcl|c213147_g4_i1|m.2980
lcl|c244315_g1_i2|m.32024
lcl|c244324_g2_i1|m.32048
lcl|c244363_g1_i1|m.32089
lcl|c244364_g1_i1|m.32091
lcl|c244396_g1_i1|m.32137
lcl|c244407_g1_i3|m.32143
lcl|c244439_g1_i1|m.32192
lcl|c244441_g1_i1|m.32200
lcl|c213160_g2_i5|m.2982
lcl|c244452_g2_i2|m.32209
lcl|c244474_g3_i1|m.32253
lcl|c244484_g2_i1|m.32270
lcl|c244488_g3_i1|m.32282
lcl|c244489_g1_i1|m.32283
lcl|c244508_g1_i1|m.32310
lcl|c65293_g1_i1|m.32646
lcl|c81884_g1_i1|m.32679
lcl|c213262_g2_i4|m.3006
lcl|c98777_g1_i1|m.32741
lcl|c185981_g1_i2|m.719
lcl|c188073_g1_i1|m.763
lcl|c195747_g2_i1|m.945
lcl|c243887_g1_i1|m.31460
lcl|c201441_g1_i1|m.1204
lcl|c202129_g1_i1|m.1242
lcl|c213278_g3_i2|m.3010
lcl|c202472_g1_i1|m.1259
lcl|c202894_g5_i1|m.1285
lcl|c203483_g1_i2|m.1328
lcl|c204986_g3_i2|m.1414
lcl|c205358_g1_i2|m.1452
lcl|c206427_g2_i4|m.1541
lcl|c206859_g1_i1|m.1600
lcl|c236885_g1_i5|m.22663
lcl|c236885_g1_i7|m.22665
lcl|c236885_g1_i3|m.22659
lcl|c207332_g2_i2|m.1633
lcl|c182463_g1_i1|m.663
lcl|c213306_g2_i1|m.3016
lcl|c208130_g1_i1|m.1735
lcl|c208140_g2_i1|m.1739
lcl|c209131_g1_i2|m.1905
lcl|c209570_g1_i3|m.2003
lcl|c209946_g1_i6|m.2078
lcl|c210031_g1_i2|m.2100
lcl|c210253_g1_i2|m.2149
lcl|c243393_g3_i1|m.30930
lcl|c223677_g1_i1|m.9303
lcl|c224624_g4_i1|m.10025
lcl|c224624_g2_i1|m.10023
lcl|c235513_g2_i1|m.20994
lcl|c222682_g3_i7|m.8525
lcl|c229067_g1_i6|m.13938
lcl|c235115_g6_i1|m.20588
lcl|c244515_g4_i1|m.32348
lcl|c231210_g4_i4|m.16042
lcl|c219953_g4_i1|m.6659
lcl|c220204_g2_i2|m.6810
lcl|c222854_g1_i1|m.8663
lcl|c214584_g4_i1|m.3540
lcl|c220736_g3_i1|m.7111
lcl|c233257_g5_i1|m.18320
lcl|c229067_g1_i3|m.13935
lcl|c226414_g7_i1|m.11461
lcl|c210423_g1_i5|m.2178
lcl|c210652_g1_i3|m.2226
lcl|c210724_g2_i1|m.2253
lcl|c244023_g1_i1|m.31634
lcl|c211001_g1_i6|m.2326
lcl|c211022_g1_i7|m.2328
lcl|c212784_g2_i1|m.2837
lcl|c212839_g1_i3|m.2877
lcl|c213311_g2_i3|m.3020
lcl|c213314_g8_i4|m.3021
lcl|c213496_g2_i3|m.3109
lcl|c213576_g12_i2|m.3138
lcl|c213677_g1_i4|m.3168
lcl|c213837_g2_i3|m.3220
lcl|c213419_g4_i1|m.3080
lcl|c213886_g7_i2|m.3271
lcl|c214164_g1_i8|m.3381
lcl|c214228_g4_i6|m.3409
lcl|c214229_g1_i1|m.3410
lcl|c214242_g1_i2|m.3413
lcl|c213143_g1_i2|m.2979
lcl|c214356_g7_i5|m.3463
lcl|c214397_g6_i4|m.3476
lcl|c214499_g2_i2|m.3512
lcl|c214530_g4_i1|m.3518
lcl|c213465_g6_i10|m.3092
lcl|c214817_g2_i1|m.3680
lcl|c214830_g3_i4|m.3696
lcl|c214915_g6_i2|m.3733
lcl|c215124_g2_i2|m.3835
lcl|c215450_g1_i1|m.4033
lcl|c215492_g2_i9|m.4058
lcl|c215553_g1_i10|m.4084
lcl|c215662_g1_i2|m.4137
lcl|c213534_g3_i4|m.3118
lcl|c215761_g1_i1|m.4176
lcl|c215763_g2_i3|m.4184
lcl|c215894_g1_i3|m.4266
lcl|c215953_g5_i6|m.4317
lcl|c215963_g8_i2|m.4326
lcl|c216038_g5_i1|m.4365
lcl|c216057_g3_i1|m.4371
lcl|c216057_g3_i4|m.4374
lcl|c216124_g1_i3|m.4406
lcl|c216129_g1_i2|m.4409
lcl|c213742_g1_i10|m.3190
lcl|c216163_g1_i3|m.4416
lcl|c216367_g2_i7|m.4555
lcl|c216377_g1_i3|m.4559
lcl|c216500_g6_i5|m.4616
lcl|c216645_g1_i1|m.4691
lcl|c216705_g1_i4|m.4732
lcl|c216786_g2_i4|m.4765
lcl|c217013_g4_i3|m.4901
lcl|c217098_g2_i2|m.4966
lcl|c213743_g5_i1|m.3191
lcl|c217182_g4_i3|m.5021
lcl|c217182_g4_i2|m.5020
lcl|c217312_g3_i2|m.5103
lcl|c217341_g1_i2|m.5116
lcl|c217405_g1_i6|m.5180
lcl|c217427_g4_i1|m.5185
lcl|c217466_g1_i3|m.5215
lcl|c230117_g1_i3|m.14970
lcl|c217585_g1_i2|m.5268
lcl|c217591_g3_i2|m.5272
lcl|c217655_g1_i10|m.5304
lcl|c217670_g3_i4|m.5309
lcl|c213826_g1_i1|m.3216
lcl|c217816_g7_i5|m.5372
lcl|c217854_g5_i6|m.5415
lcl|c217988_g6_i3|m.5463
lcl|c218196_g3_i9|m.5616
lcl|c218214_g1_i2|m.5634
lcl|c218357_g3_i2|m.5741
lcl|c218374_g1_i3|m.5753
lcl|c218647_g3_i1|m.5884
lcl|c218730_g2_i11|m.5922
lcl|c218844_g4_i7|m.5991
lcl|c213850_g3_i2|m.3229
lcl|c218881_g3_i2|m.6022
lcl|c218968_g13_i5|m.6107
lcl|c219160_g4_i1|m.6235
lcl|c219237_g2_i4|m.6297
lcl|c219327_g1_i2|m.6330
lcl|c219462_g5_i7|m.6389
lcl|c219473_g3_i1|m.6396
lcl|c219495_g3_i10|m.6406
lcl|c219546_g2_i1|m.6439
lcl|c219556_g4_i5|m.6447
lcl|c219662_g1_i2|m.6507
lcl|c219710_g2_i1|m.6538
lcl|c214653_g2_i1|m.3571
lcl|c219733_g1_i5|m.6547
lcl|c219829_g2_i1|m.6600
lcl|c219883_g1_i2|m.6624
lcl|c220306_g1_i5|m.6860
lcl|c220360_g1_i5|m.6901
lcl|c220409_g3_i3|m.6926
lcl|c220464_g2_i2|m.6955
lcl|c220629_g1_i1|m.7036
lcl|c183284_g1_i1|m.675
lcl|c213888_g2_i1|m.3274
lcl|c220633_g2_i2|m.7049
lcl|c220640_g5_i2|m.7065
lcl|c220657_g1_i4|m.7075
lcl|c220657_g1_i5|m.7076
lcl|c220808_g2_i6|m.7171
lcl|c220897_g5_i4|m.7224
lcl|c220945_g4_i2|m.7256
lcl|c220947_g2_i1|m.7263
lcl|c221039_g1_i2|m.7339
lcl|c221054_g2_i5|m.7352
lcl|c213946_g11_i4|m.3301
lcl|c221101_g1_i4|m.7399
lcl|c221225_g1_i6|m.7493
lcl|c221281_g1_i1|m.7531
lcl|c221356_g3_i2|m.7588
lcl|c221374_g4_i3|m.7595
lcl|c221440_g2_i5|m.7632
lcl|c221441_g1_i5|m.7633
lcl|c221482_g1_i3|m.7664
lcl|c221495_g1_i4|m.7674
lcl|c214028_g2_i1|m.3329
lcl|c221497_g1_i2|m.7677
lcl|c221524_g4_i2|m.7708
lcl|c221524_g4_i1|m.7707
lcl|c221583_g3_i2|m.7741
lcl|c221608_g1_i1|m.7755
lcl|c221672_g4_i6|m.7784
lcl|c221676_g4_i4|m.7786
lcl|c225423_g3_i2|m.10600
lcl|c227927_g4_i1|m.12894
lcl|c228653_g2_i5|m.13498
lcl|c221802_g2_i1|m.7868
lcl|c226454_g2_i2|m.11493
lcl|c242662_g1_i1|m.30100
lcl|c217326_g3_i1|m.5105
lcl|c221883_g2_i12|m.7953
lcl|c222140_g4_i1|m.8123
lcl|c222155_g2_i2|m.8140
lcl|c222187_g6_i2|m.8154
lcl|c214032_g1_i4|m.3331
lcl|c222208_g5_i7|m.8170
lcl|c222225_g1_i1|m.8189
lcl|c222306_g9_i1|m.8237
lcl|c222339_g3_i2|m.8253
lcl|c222399_g1_i2|m.8304
lcl|c244474_g2_i1|m.32252
lcl|c224694_g1_i1|m.10068
lcl|c222419_g1_i6|m.8316
lcl|c222437_g1_i2|m.8353
lcl|c222451_g1_i1|m.8369
lcl|c222456_g3_i2|m.8372
lcl|c214108_g4_i4|m.3369
lcl|c222459_g5_i1|m.8379
lcl|c222639_g5_i2|m.8480
lcl|c222667_g10_i4|m.8510
lcl|c222899_g2_i4|m.8691
lcl|c222915_g1_i4|m.8711
lcl|c222946_g2_i3|m.8728
lcl|c220806_g2_i3|m.7164
lcl|c214189_g1_i1|m.3388
lcl|c222950_g5_i5|m.8734
lcl|c222960_g2_i1|m.8750
lcl|c214118_g1_i2|m.3372
lcl|c223053_g2_i3|m.8836
lcl|c223078_g3_i2|m.8859
lcl|c223098_g6_i3|m.8878
lcl|c223162_g2_i6|m.8914
lcl|c223274_g3_i3|m.8991
lcl|c223277_g3_i4|m.8995
lcl|c223331_g1_i2|m.9037
lcl|c223345_g3_i1|m.9044
lcl|c223355_g1_i3|m.9051
lcl|c214211_g3_i3|m.3396
lcl|c223365_g2_i2|m.9063
lcl|c223378_g2_i2|m.9075
lcl|c223414_g3_i3|m.9104
lcl|c223448_g1_i3|m.9130
lcl|c223448_g1_i5|m.9132
lcl|c223454_g1_i3|m.9139
lcl|c223499_g2_i8|m.9175
lcl|c223499_g2_i6|m.9173
lcl|c223556_g1_i6|m.9203
lcl|c223608_g1_i1|m.9238
lcl|c223629_g2_i1|m.9258
lcl|c223629_g2_i2|m.9260
lcl|c214261_g2_i4|m.3427
lcl|c223654_g2_i3|m.9281
lcl|c223673_g2_i1|m.9297
lcl|c223761_g4_i7|m.9360
lcl|c223761_g4_i10|m.9352
lcl|c223794_g7_i1|m.9389
lcl|c223808_g2_i1|m.9405
lcl|c223865_g4_i2|m.9445
lcl|c223901_g5_i2|m.9467
lcl|c223941_g1_i2|m.9485
lcl|c221840_g3_i2|m.7908
lcl|c221840_g3_i5|m.7911
lcl|c224714_g2_i1|m.10079
lcl|c214319_g7_i2|m.3452
lcl|c224029_g4_i1|m.9563
lcl|c224057_g7_i5|m.9575
lcl|c224226_g3_i4|m.9666
lcl|c224257_g2_i4|m.9682
lcl|c224260_g2_i3|m.9686
lcl|c224263_g3_i3|m.9691
lcl|c224312_g2_i3|m.9718
lcl|c203039_g1_i1|m.1291
lcl|c224361_g2_i9|m.9757
lcl|c224498_g4_i2|m.9859
lcl|c224541_g6_i2|m.9899
lcl|c224583_g1_i1|m.9971
lcl|c224713_g2_i1|m.10075
lcl|c224811_g1_i3|m.10150
lcl|c224835_g5_i2|m.10167
lcl|c224848_g3_i5|m.10172
lcl|c224890_g1_i1|m.10217
lcl|c224995_g6_i2|m.10289
lcl|c225079_g1_i6|m.10351
lcl|c225112_g3_i3|m.10371
lcl|c187253_g2_i1|m.744
lcl|c214539_g3_i1|m.3522
lcl|c225115_g3_i4|m.10375
lcl|c225132_g1_i3|m.10387
lcl|c225136_g5_i9|m.10397
lcl|c225156_g8_i5|m.10409
lcl|c225214_g2_i5|m.10448
lcl|c225236_g1_i2|m.10460
lcl|c225245_g1_i2|m.10472
lcl|c225328_g5_i5|m.10528
lcl|c225457_g2_i2|m.10643
lcl|c214559_g9_i1|m.3528
lcl|c225471_g2_i2|m.10654
lcl|c225478_g2_i2|m.10668
lcl|c225478_g2_i1|m.10667
lcl|c225747_g4_i1|m.10900
lcl|c225753_g2_i5|m.10911
lcl|c223432_g3_i1|m.9111
lcl|c225756_g1_i2|m.10914
lcl|c225775_g7_i7|m.10937
lcl|c225789_g4_i1|m.10946
lcl|c225859_g2_i6|m.10997
lcl|c226009_g3_i5|m.11131
lcl|c214573_g3_i1|m.3534
lcl|c226079_g3_i1|m.11186
lcl|c226079_g3_i2|m.11188
lcl|c226146_g2_i7|m.11244
lcl|c226156_g7_i2|m.11251
lcl|c226613_g4_i3|m.11623
lcl|c226629_g1_i3|m.11641
lcl|c226705_g1_i7|m.11718
lcl|c214602_g8_i1|m.3549
lcl|c226715_g5_i2|m.11728
lcl|c226739_g4_i2|m.11743
lcl|c226769_g3_i1|m.11767
lcl|c210478_g1_i4|m.2192
lcl|c226971_g4_i9|m.11985
lcl|c226978_g9_i3|m.11996
lcl|c227069_g2_i12|m.12102
lcl|c227108_g1_i3|m.12161
lcl|c237065_g1_i1|m.22858
lcl|c237065_g1_i5|m.22860
lcl|c214652_g1_i3|m.3567
lcl|c227129_g2_i15|m.12185
lcl|c227180_g1_i4|m.12217
lcl|c227188_g1_i3|m.12224
lcl|c227206_g2_i7|m.12247
lcl|c227332_g2_i2|m.12341
lcl|c227562_g6_i1|m.12582
lcl|c227564_g2_i6|m.12586
lcl|c227731_g2_i1|m.12715
lcl|c214656_g8_i1|m.3574
lcl|c227758_g2_i4|m.12736
lcl|c227762_g5_i1|m.12740
lcl|c227780_g2_i3|m.12767
lcl|c227804_g2_i3|m.12774
lcl|c227856_g7_i5|m.12838
lcl|c227887_g3_i2|m.12871
lcl|c227910_g4_i10|m.12878
lcl|c227928_g1_i2|m.12896
lcl|c227928_g3_i7|m.12901
lcl|c227939_g2_i2|m.12910
lcl|c227958_g2_i1|m.12924
lcl|c227993_g1_i6|m.12952
lcl|c228113_g1_i1|m.13052
lcl|c228221_g2_i9|m.13137
lcl|c228244_g5_i1|m.13157
lcl|c228245_g4_i3|m.13160
lcl|c228256_g1_i10|m.13166
lcl|c228278_g3_i2|m.13197
lcl|c228300_g4_i1|m.13216
lcl|c228309_g1_i6|m.13221
lcl|c214691_g1_i1|m.3614
lcl|c228406_g1_i6|m.13304
lcl|c228453_g2_i2|m.13342
lcl|c228525_g4_i3|m.13399
lcl|c228543_g5_i2|m.13413
lcl|c228577_g3_i1|m.13439
lcl|c228608_g2_i2|m.13456
lcl|c228666_g1_i2|m.13507
lcl|c228678_g2_i11|m.13512
lcl|c228700_g2_i5|m.13572
lcl|c228700_g2_i1|m.13568
lcl|c214720_g1_i1|m.3639
lcl|c228728_g1_i4|m.13597
lcl|c228746_g3_i3|m.13615
lcl|c228746_g2_i5|m.13610
lcl|c228772_g4_i5|m.13636
lcl|c228830_g2_i1|m.13692
lcl|c228994_g6_i1|m.13852
lcl|c229012_g1_i8|m.13875
lcl|c229056_g1_i4|m.13924
lcl|c229060_g1_i1|m.13927
lcl|c214720_g2_i1|m.3640
lcl|c229073_g2_i1|m.13946
lcl|c229089_g2_i5|m.13955
lcl|c229110_g2_i1|m.13970
lcl|c229132_g1_i2|m.13984
lcl|c229134_g1_i1|m.13988
lcl|c229184_g1_i1|m.14022
lcl|c229340_g1_i1|m.14173
lcl|c229342_g3_i2|m.14179
lcl|c229342_g3_i1|m.14174
lcl|c229362_g2_i10|m.14209
lcl|c187971_g1_i1|m.759
lcl|c214827_g5_i1|m.3692
lcl|c229503_g1_i3|m.14339
lcl|c229507_g2_i4|m.14343
lcl|c229561_g1_i12|m.14408
lcl|c229615_g3_i4|m.14451
lcl|c229670_g1_i2|m.14513
lcl|c229692_g2_i9|m.14545
lcl|c229751_g1_i2|m.14592
lcl|c229768_g1_i6|m.14605
lcl|c214832_g3_i2|m.3697
lcl|c229808_g4_i2|m.14641
lcl|c229841_g2_i2|m.14676
lcl|c229886_g1_i6|m.14730
lcl|c229886_g1_i5|m.14728
lcl|c229886_g1_i1|m.14723
lcl|c230002_g4_i1|m.14846
lcl|c230011_g2_i5|m.14861
lcl|c230039_g1_i2|m.14881
lcl|c230054_g1_i7|m.14897
lcl|c230102_g4_i1|m.14957
lcl|c214891_g1_i1|m.3715
lcl|c230124_g3_i6|m.14973
lcl|c230150_g4_i2|m.14989
lcl|c230186_g5_i1|m.15032
lcl|c230220_g1_i2|m.15064
lcl|c230220_g1_i3|m.15065
lcl|c230276_g3_i1|m.15112
lcl|c230360_g10_i5|m.15205
lcl|c230405_g2_i9|m.15259
lcl|c230413_g1_i5|m.15274
lcl|c214925_g1_i1|m.3737
lcl|c230431_g5_i1|m.15286
lcl|c230434_g3_i8|m.15304
lcl|c230438_g3_i4|m.15312
lcl|c230481_g5_i1|m.15356
lcl|c230636_g2_i1|m.15503
lcl|c230792_g1_i1|m.15630
lcl|c230823_g3_i1|m.15672
lcl|c230829_g2_i5|m.15683
lcl|c230880_g3_i5|m.15737
lcl|c230947_g2_i4|m.15815
lcl|c214971_g5_i1|m.3758
lcl|c231030_g9_i2|m.15907
lcl|c231043_g3_i4|m.15925
lcl|c231142_g1_i4|m.15993
lcl|c215957_g2_i7|m.4321
lcl|c231190_g4_i3|m.16030
lcl|c231190_g4_i6|m.16031
lcl|c231257_g1_i5|m.16082
lcl|c231285_g1_i2|m.16098
lcl|c231326_g2_i1|m.16129
lcl|c231339_g4_i2|m.16143
lcl|c214971_g6_i7|m.3760
lcl|c231352_g2_i1|m.16156
lcl|c231430_g2_i6|m.16242
lcl|c231430_g2_i12|m.16236
lcl|c231440_g4_i2|m.16256
lcl|c231469_g3_i4|m.16290
lcl|c231477_g1_i1|m.16301
lcl|c231506_g1_i1|m.16344
lcl|c231559_g1_i5|m.16408
lcl|c231575_g5_i2|m.16426
lcl|c231634_g1_i2|m.16472
lcl|c214975_g3_i2|m.3761
lcl|c231859_g5_i5|m.16713
lcl|c221076_g3_i4|m.7373
lcl|c221146_g4_i1|m.7411
lcl|c231864_g5_i1|m.16720
lcl|c231896_g2_i12|m.16763
lcl|c231963_g1_i7|m.16837
lcl|c231982_g2_i3|m.16868
lcl|c232046_g3_i8|m.16952
lcl|c232109_g7_i6|m.17002
lcl|c232116_g4_i2|m.17015
lcl|c232149_g3_i2|m.17053
lcl|c232249_g2_i1|m.17180
lcl|c215059_g3_i1|m.3798
lcl|c232274_g1_i4|m.17210
lcl|c232369_g2_i7|m.17306
lcl|c232426_g1_i1|m.17360
lcl|c232520_g2_i5|m.17456
lcl|c232532_g2_i4|m.17479
lcl|c232628_g4_i3|m.17621
lcl|c232660_g2_i7|m.17650
lcl|c232758_g3_i1|m.17745
lcl|c232758_g3_i3|m.17747
lcl|c215093_g1_i2|m.3818
lcl|c232843_g1_i4|m.17830
lcl|c226607_g5_i2|m.11621
lcl|c232850_g3_i3|m.17837
lcl|c232931_g1_i10|m.17922
lcl|c233011_g1_i2|m.18023
lcl|c233012_g3_i3|m.18031
lcl|c233024_g1_i6|m.18051
lcl|c233026_g1_i2|m.18055
lcl|c233030_g2_i3|m.18059
lcl|c233040_g3_i1|m.18068
lcl|c233048_g1_i8|m.18077
lcl|c233068_g3_i4|m.18107
lcl|c233068_g3_i2|m.18104
lcl|c211676_g2_i1|m.2488
lcl|c211676_g2_i2|m.2489
lcl|c233088_g8_i4|m.18128
lcl|c233103_g2_i1|m.18143
lcl|c233130_g1_i1|m.18171
lcl|c233215_g1_i5|m.18281
lcl|c233235_g3_i2|m.18302
lcl|c233260_g1_i1|m.18321
lcl|c233306_g1_i2|m.18390
lcl|c233334_g2_i12|m.18425
lcl|c233334_g2_i17|m.18426
lcl|c188047_g2_i2|m.760
lcl|c215279_g2_i6|m.3910
lcl|c233342_g3_i7|m.18440
lcl|c233377_g4_i3|m.18471
lcl|c233384_g5_i1|m.18475
lcl|c233495_g1_i1|m.18614
lcl|c233557_g1_i1|m.18714
lcl|c233661_g2_i3|m.18841
lcl|c233765_g2_i1|m.18981
lcl|c233767_g1_i3|m.18989
lcl|c233774_g10_i4|m.19004
lcl|c233774_g10_i1|m.19002
lcl|c233784_g1_i2|m.19012
lcl|c215299_g2_i2|m.3927
lcl|c233817_g1_i1|m.19030
lcl|c233905_g2_i1|m.19151
lcl|c233922_g1_i2|m.19174
lcl|c228945_g3_i2|m.13809
lcl|c233948_g1_i2|m.19238
lcl|c233953_g2_i7|m.19245
lcl|c234077_g1_i1|m.19404
lcl|c234080_g1_i1|m.19410
lcl|c234082_g2_i6|m.19416
lcl|c215313_g3_i2|m.3930
lcl|c234108_g1_i5|m.19456
lcl|c234114_g3_i3|m.19475
lcl|c234120_g6_i1|m.19489
lcl|c234135_g3_i2|m.19525
lcl|c234177_g2_i1|m.19581
lcl|c234222_g6_i3|m.19630
lcl|c234421_g4_i7|m.19822
lcl|c234442_g1_i3|m.19849
lcl|c215316_g1_i1|m.3942
lcl|c234533_g4_i3|m.19947
lcl|c234544_g3_i6|m.19962
lcl|c234579_g2_i6|m.20008
lcl|c234620_g1_i3|m.20041
lcl|c234626_g4_i3|m.20042
lcl|c229538_g7_i4|m.14373
lcl|c234643_g1_i12|m.20068
lcl|c234643_g1_i1|m.20065
lcl|c234643_g1_i2|m.20073
lcl|c234643_g1_i7|m.20081
lcl|c234643_g1_i6|m.20078
lcl|c234655_g3_i2|m.20090
lcl|c234687_g2_i2|m.20139
lcl|c234783_g2_i5|m.20249
lcl|c215397_g1_i1|m.4004
lcl|c234833_g2_i1|m.20306
lcl|c234851_g1_i2|m.20336
lcl|c234869_g3_i5|m.20367
lcl|c234883_g2_i2|m.20378
lcl|c234883_g2_i9|m.20380
lcl|c234898_g1_i3|m.20394
lcl|c234912_g2_i1|m.20410
lcl|c234955_g3_i8|m.20446
lcl|c235052_g1_i4|m.20524
lcl|c223297_g2_i1|m.9009
lcl|c235089_g1_i3|m.20552
lcl|c235253_g1_i1|m.20757
lcl|c235276_g3_i3|m.20780
lcl|c235384_g3_i4|m.20872
lcl|c235446_g2_i1|m.20934
lcl|c235506_g6_i4|m.20981
lcl|c235529_g1_i1|m.21016
lcl|c217263_g3_i1|m.5056
lcl|c235530_g1_i2|m.21019
lcl|c235548_g1_i1|m.21054
lcl|c215430_g1_i6|m.4026
lcl|c235710_g2_i3|m.21243
lcl|c235710_g2_i1|m.21242
lcl|c235735_g2_i4|m.21279
lcl|c235859_g3_i3|m.21393
lcl|c235877_g4_i2|m.21429
lcl|c236044_g2_i2|m.21614
lcl|c236087_g2_i1|m.21666
lcl|c236114_g1_i1|m.21718
lcl|c236138_g1_i3|m.21749
lcl|c236174_g2_i1|m.21787
lcl|c236195_g2_i4|m.21823
lcl|c236195_g4_i1|m.21828
lcl|c236195_g2_i1|m.21821
lcl|c236210_g3_i1|m.21846
lcl|c236213_g2_i1|m.21849
lcl|c236234_g4_i10|m.21877
lcl|c236239_g1_i2|m.21882
lcl|c236250_g3_i7|m.21896
lcl|c236256_g2_i1|m.21902
lcl|c236356_g1_i1|m.22029
lcl|c236360_g3_i2|m.22033
lcl|c236395_g1_i2|m.22070
lcl|c236444_g1_i2|m.22121
lcl|c215455_g1_i1|m.4036
lcl|c236445_g2_i1|m.22123
lcl|c236445_g2_i3|m.22125
lcl|c236486_g1_i1|m.22162
lcl|c236516_g4_i3|m.22202
lcl|c236542_g2_i1|m.22226
lcl|c236683_g3_i1|m.22390
lcl|c236793_g3_i9|m.22532
lcl|c236859_g1_i3|m.22625
lcl|c236867_g1_i1|m.22637
lcl|c236892_g3_i5|m.22669
lcl|c236892_g3_i6|m.22670
lcl|c215465_g1_i1|m.4044
lcl|c236909_g3_i2|m.22685
lcl|c235901_g3_i2|m.21452
lcl|c184118_g1_i1|m.691
lcl|c236955_g1_i6|m.22720
lcl|c237237_g1_i5|m.23062
lcl|c237311_g4_i1|m.23148
lcl|c237328_g3_i1|m.23165
lcl|c237535_g3_i3|m.23359
lcl|c215551_g6_i1|m.4083
lcl|c237550_g1_i1|m.23390
lcl|c237576_g2_i7|m.23440
lcl|c237578_g2_i2|m.23441
lcl|c237593_g3_i1|m.23463
lcl|c237593_g3_i5|m.23465
lcl|c237596_g1_i10|m.23471
lcl|c237609_g2_i1|m.23487
lcl|c237612_g2_i4|m.23492
lcl|c237638_g1_i15|m.23528
lcl|c237658_g3_i4|m.23566
lcl|c237658_g3_i3|m.23565
lcl|c215606_g3_i1|m.4107
lcl|c237711_g3_i12|m.23641
lcl|c237732_g2_i2|m.23675
lcl|c237732_g2_i12|m.23671
lcl|c237804_g3_i5|m.23771
lcl|c237805_g1_i7|m.23781
lcl|c237814_g2_i3|m.23786
lcl|c237814_g2_i4|m.23787
lcl|c237851_g2_i1|m.23817
lcl|c237883_g5_i1|m.23858
lcl|c237938_g3_i2|m.23906
lcl|c237955_g4_i3|m.23932
lcl|c237955_g4_i2|m.23931
lcl|c237982_g4_i2|m.23956
lcl|c215616_g6_i2|m.4120
lcl|c237992_g1_i1|m.23966
lcl|c238005_g1_i2|m.23984
lcl|c238005_g1_i4|m.23993
lcl|c238054_g2_i6|m.24053
lcl|c238111_g1_i1|m.24102
lcl|c238116_g1_i4|m.24117
lcl|c238132_g3_i11|m.24132
lcl|c238132_g3_i10|m.24131
lcl|c238132_g3_i1|m.24130
lcl|c238140_g4_i1|m.24154
lcl|c238150_g1_i3|m.24168
lcl|c238150_g1_i2|m.24167
lcl|c238150_g1_i5|m.24172
lcl|c238164_g1_i1|m.24182
lcl|c238296_g3_i2|m.24349
lcl|c215627_g1_i1|m.4125
lcl|c238364_g3_i7|m.24424
lcl|c238364_g3_i1|m.24422
lcl|c238381_g2_i2|m.24448
lcl|c238399_g3_i5|m.24485
lcl|c238399_g3_i2|m.24483
lcl|c238399_g3_i3|m.24484
lcl|c238429_g5_i1|m.24515
lcl|c238491_g1_i8|m.24586
lcl|c238537_g2_i6|m.24628
lcl|c229550_g1_i3|m.14393
lcl|c201183_g1_i1|m.1186
lcl|c238647_g1_i1|m.24759
lcl|c238662_g3_i6|m.24778
lcl|c238676_g4_i3|m.24804
lcl|c215636_g1_i1|m.4133
lcl|c238681_g1_i11|m.24819
lcl|c238754_g1_i3|m.24885
lcl|c238843_g5_i10|m.24992
lcl|c238850_g2_i5|m.25002
lcl|c238853_g1_i1|m.25008
lcl|c238859_g1_i3|m.25019
lcl|c238912_g1_i4|m.25063
lcl|c238912_g1_i8|m.25068
lcl|c238919_g4_i6|m.25079
lcl|c238994_g2_i3|m.25167
lcl|c215667_g2_i4|m.4143
lcl|c239047_g3_i1|m.25231
lcl|c239047_g3_i3|m.25234
lcl|c239125_g3_i2|m.25324
lcl|c239136_g4_i3|m.25338
lcl|c239191_g2_i1|m.25412
lcl|c239216_g2_i7|m.25448
lcl|c239240_g3_i4|m.25490
lcl|c239261_g1_i11|m.25522
lcl|c239261_g1_i12|m.25525
lcl|c215676_g2_i1|m.4150
lcl|c239281_g1_i1|m.25557
lcl|c239376_g2_i11|m.25691
lcl|c239376_g2_i8|m.25695
lcl|c239419_g1_i1|m.25763
lcl|c239419_g1_i10|m.25764
lcl|c239424_g1_i7|m.25774
lcl|c239517_g6_i1|m.25917
lcl|c239543_g6_i2|m.25954
lcl|c239546_g1_i2|m.25957
lcl|c239571_g1_i3|m.25989
lcl|c239571_g1_i8|m.25993
lcl|c215720_g4_i1|m.4168
lcl|c239643_g6_i2|m.26073
lcl|c239662_g2_i17|m.26115
lcl|c239700_g3_i2|m.26207
lcl|c239722_g4_i5|m.26254
lcl|c239763_g2_i3|m.26299
lcl|c239814_g2_i1|m.26347
lcl|c239814_g2_i3|m.26348
lcl|c239816_g8_i1|m.26351
lcl|c239816_g8_i3|m.26354
lcl|c216784_g1_i1|m.4762
lcl|c239835_g2_i1|m.26401
lcl|c239860_g1_i2|m.26443
lcl|c239860_g1_i1|m.26440
lcl|c239860_g1_i4|m.26447
lcl|c218302_g5_i1|m.5709
lcl|c215778_g6_i2|m.4198
lcl|c239956_g2_i4|m.26561
lcl|c240034_g1_i1|m.26673
lcl|c240071_g1_i3|m.26729
lcl|c240071_g1_i5|m.26730
lcl|c240077_g1_i1|m.26736
lcl|c240077_g1_i6|m.26741
lcl|c240077_g1_i4|m.26740
lcl|c240077_g1_i9|m.26743
lcl|c240128_g3_i1|m.26827
lcl|c240158_g2_i1|m.26858
lcl|c240245_g2_i2|m.26954
lcl|c240253_g1_i1|m.26963
lcl|c244342_g1_i1|m.32068
lcl|c240259_g4_i3|m.26973
lcl|c240259_g4_i5|m.26974
lcl|c240264_g4_i5|m.26985
lcl|c215819_g3_i2|m.4218
lcl|c240297_g1_i2|m.27045
lcl|c240333_g1_i3|m.27087
lcl|c240370_g1_i1|m.27121
lcl|c240483_g2_i3|m.27310
lcl|c240483_g1_i8|m.27301
lcl|c240483_g1_i4|m.27290
lcl|c240483_g1_i3|m.27286
lcl|c240523_g1_i10|m.27367
lcl|c240612_g3_i13|m.27477
lcl|c240621_g3_i2|m.27488
lcl|c240699_g3_i15|m.27615
lcl|c240711_g1_i2|m.27634
lcl|c141061_g1_i1|m.229
lcl|c192621_g3_i1|m.866
lcl|c215838_g2_i1|m.4235
lcl|c240720_g1_i3|m.27662
lcl|c240732_g2_i2|m.27675
lcl|c240787_g1_i1|m.27744
lcl|c240852_g1_i3|m.27810
lcl|c232899_g1_i2|m.17887
lcl|c240887_g1_i5|m.27881
lcl|c240901_g2_i12|m.27918
lcl|c240948_g3_i3|m.27988
lcl|c241027_g2_i3|m.28090
lcl|c215924_g3_i1|m.4285
lcl|c241055_g1_i5|m.28132
lcl|c241105_g3_i1|m.28176
lcl|c241105_g3_i4|m.28181
lcl|c241174_g2_i10|m.28286
lcl|c241242_g1_i1|m.28345
lcl|c241252_g2_i5|m.28366
lcl|c241254_g2_i1|m.28367
lcl|c241378_g5_i4|m.28499
lcl|c241687_g2_i1|m.28855
lcl|c241763_g6_i2|m.28918
lcl|c215928_g3_i1|m.4293
lcl|c241792_g2_i3|m.28939
lcl|c241817_g1_i2|m.28964
lcl|c241817_g1_i5|m.28968
lcl|c241874_g1_i11|m.29053
lcl|c241874_g1_i1|m.29043
lcl|c241874_g1_i7|m.29076
lcl|c241874_g1_i1|m.29042
lcl|c241874_g1_i11|m.29054
lcl|c241874_g1_i1|m.29044
lcl|c241900_g1_i2|m.29120
lcl|c241916_g1_i7|m.29148
lcl|c242362_g2_i1|m.29701
lcl|c242487_g1_i2|m.29847
lcl|c215957_g2_i1|m.4319
lcl|c242601_g4_i2|m.30017
lcl|c242633_g1_i1|m.30058
lcl|c242709_g1_i2|m.30167
lcl|c242755_g1_i3|m.30192
lcl|c242868_g4_i4|m.30303
lcl|c242920_g6_i2|m.30392
lcl|c243004_g1_i3|m.30514
lcl|c243059_g4_i3|m.30568
lcl|c216188_g2_i2|m.4423
lcl|c243178_g2_i2|m.30695
lcl|c243222_g3_i1|m.30722
lcl|c243234_g1_i2|m.30739
lcl|c243269_g3_i1|m.30762
lcl|c243326_g1_i1|m.30823
lcl|c243357_g2_i4|m.30881
lcl|c243493_g3_i2|m.31028
lcl|c243591_g3_i1|m.31105
lcl|c243632_g1_i1|m.31156
lcl|c216194_g2_i1|m.4425
lcl|c243652_g1_i2|m.31190
lcl|c243813_g3_i2|m.31355
lcl|c244040_g1_i4|m.31664
lcl|c244151_g1_i2|m.31813
lcl|c244353_g1_i1|m.32081
lcl|c318732_g1_i1|m.32501
lcl|c270076_g1_i1|m.32416
lcl|c11224_g1_i1|m.56
lcl|c216201_g2_i1|m.4428
lcl|c162537_g1_i1|m.417
lcl|c210341_g5_i1|m.2162
lcl|c214067_g1_i1|m.3351
lcl|c214535_g1_i1|m.3520
lcl|c215388_g4_i3|m.4003
lcl|c216289_g7_i1|m.4487
lcl|c216467_g8_i2|m.4597
lcl|c217363_g1_i6|m.5152
lcl|c218183_g4_i3|m.5602
lcl|c218706_g7_i3|m.5908
lcl|c219763_g5_i3|m.6564
lcl|c221681_g2_i2|m.7790
lcl|c225511_g5_i8|m.10700
lcl|c226094_g1_i1|m.11204
lcl|c226303_g1_i2|m.11380
lcl|c230104_g4_i1|m.14959
lcl|c233581_g5_i1|m.18734
lcl|c234467_g2_i1|m.19858
lcl|c234999_g3_i3|m.20494
lcl|c236924_g5_i3|m.22694
lcl|c194625_g1_i1|m.911
lcl|c239660_g2_i2|m.26111
lcl|c239931_g2_i1|m.26539
lcl|c240589_g2_i1|m.27450
lcl|c240624_g2_i1|m.27495
lcl|c240911_g1_i2|m.27934
lcl|c78380_g1_i1|m.32668
lcl|c224585_g1_i10|m.9981
lcl|c216448_g1_i1|m.4592
lcl|c233603_g4_i1|m.18756
lcl|c234432_g4_i4|m.19839
lcl|c235965_g1_i2|m.21509
lcl|c238392_g2_i2|m.24470
lcl|c241473_g1_i3|m.28626
lcl|c216467_g10_i1|m.4595
lcl|c200829_g1_i1|m.1157
lcl|c214244_g2_i4|m.3420
lcl|c217509_g3_i3|m.5228
lcl|c217990_g1_i1|m.5468
lcl|c221337_g4_i1|m.7577
lcl|c223254_g1_i1|m.8977
lcl|c216467_g8_i1|m.4596
lcl|c223456_g2_i1|m.9146
lcl|c231569_g1_i6|m.16419
lcl|c216506_g3_i1|m.4617
lcl|c236926_g1_i1|m.22696
lcl|c237818_g4_i3|m.23793
lcl|c238150_g1_i3|m.24169
lcl|c240476_g1_i3|m.27282
lcl|c241873_g2_i3|m.29041
lcl|c216527_g1_i2|m.4625
lcl|c244194_g2_i1|m.31876
lcl|c216691_g1_i1|m.4729
lcl|c220645_g6_i10|m.7070
lcl|c224457_g3_i2|m.9821
lcl|c228343_g4_i2|m.13277
lcl|c216539_g3_i3|m.4633
lcl|c229665_g1_i8|m.14500
lcl|c230280_g4_i1|m.15118
lcl|c235308_g1_i4|m.20801
lcl|c240068_g2_i2|m.26723
lcl|c185883_g1_i2|m.712
lcl|c216567_g2_i2|m.4643
lcl|c218000_g1_i5|m.5473
lcl|c218388_g2_i3|m.5763
lcl|c219866_g1_i1|m.6616
lcl|c235103_g2_i5|m.20564
lcl|c235769_g9_i1|m.21325
lcl|c216598_g2_i1|m.4667
lcl|c240035_g1_i1|m.26689
lcl|c218972_g2_i1|m.6108
lcl|c235488_g3_i10|m.20959
lcl|c216621_g3_i1|m.4676
lcl|c221711_g1_i1|m.7807
lcl|c229093_g1_i2|m.13957
lcl|c231579_g2_i1|m.16430
lcl|c216650_g2_i1|m.4697
lcl|c233364_g2_i1|m.18459
lcl|c216655_g1_i1|m.4705
lcl|c226513_g6_i2|m.11548
lcl|c230610_g4_i3|m.15445
lcl|c234391_g1_i4|m.19790
lcl|c234626_g5_i4|m.20044
lcl|c216702_g5_i1|m.4730
lcl|c243406_g1_i1|m.30946
lcl|c243675_g4_i3|m.31228
lcl|c227548_g2_i4|m.12564
lcl|c216818_g1_i2|m.4792
lcl|c240246_g6_i1|m.26956
lcl|c214556_g2_i3|m.3526
lcl|c224107_g2_i1|m.9605
lcl|c216834_g4_i2|m.4800
lcl|c227073_g3_i1|m.12111
lcl|c206182_g1_i1|m.1515
lcl|c213259_g2_i1|m.3003
lcl|c216848_g3_i4|m.4809
lcl|c223357_g4_i3|m.9060
lcl|c225637_g3_i2|m.10796
lcl|c234030_g1_i1|m.19351
lcl|c238835_g5_i1|m.24969
lcl|c230890_g2_i1|m.15747
lcl|c228247_g2_i1|m.13162
lcl|c238725_g2_i10|m.24864
lcl|c216872_g3_i2|m.4822
lcl|c235430_g2_i10|m.20924
lcl|c236218_g9_i1|m.21856
lcl|c227168_g5_i1|m.12205
lcl|c229938_g5_i10|m.14794
lcl|c216899_g1_i1|m.4840
lcl|c216303_g1_i4|m.4515
lcl|c240578_g4_i1|m.27439
lcl|c216805_g6_i1|m.4788
lcl|c198620_g1_i2|m.1049
lcl|c216916_g1_i2|m.4843
lcl|c228417_g1_i13|m.13317
lcl|c215741_g2_i3|m.4173
lcl|c240846_g1_i2|m.27805
lcl|c216942_g4_i3|m.4860
lcl|c227622_g3_i12|m.12620
lcl|c226705_g1_i7|m.11719
lcl|c216953_g1_i3|m.4865
lcl|c228448_g3_i1|m.13331
lcl|c229166_g4_i2|m.14015
lcl|c230320_g1_i1|m.15166
lcl|c242869_g2_i4|m.30308
lcl|c210995_g1_i1|m.2321
lcl|c222542_g3_i2|m.8415
lcl|c225557_g1_i1|m.10731
lcl|c228938_g1_i6|m.13802
lcl|c217005_g3_i1|m.4893
lcl|c243880_g1_i1|m.31456
lcl|c220294_g1_i11|m.6858
lcl|c221624_g3_i1|m.7766
lcl|c225365_g4_i1|m.10559
lcl|c217792_g3_i1|m.5367
lcl|c225005_g5_i1|m.10295
lcl|c217046_g2_i2|m.4921
lcl|c237268_g2_i2|m.23103
lcl|c240117_g3_i4|m.26812
lcl|c183731_g1_i1|m.686
lcl|c220230_g1_i10|m.6831
lcl|c217146_g1_i1|m.4997
lcl|c238156_g5_i4|m.24180
lcl|c236496_g1_i1|m.22170
lcl|c35802_g1_i1|m.32567
lcl|c221832_g4_i3|m.7892
lcl|c217195_g5_i2|m.5022
lcl|c231102_g1_i6|m.15966
lcl|c218185_g1_i2|m.5605
lcl|c233217_g3_i1|m.18285
lcl|c198665_g3_i2|m.1050
lcl|c217198_g5_i5|m.5024
lcl|c235267_g2_i2|m.20774
lcl|c224772_g1_i1|m.10116
lcl|c217199_g3_i2|m.5026
lcl|c221244_g1_i4|m.7506
lcl|c217447_g9_i5|m.5205
lcl|c214309_g2_i1|m.3450
lcl|c244381_g2_i1|m.32105
lcl|c217534_g1_i2|m.5231
lcl|c186217_g1_i1|m.726
lcl|c234159_g2_i1|m.19552
lcl|c217573_g1_i1|m.5252
lcl|c230044_g4_i2|m.14887
lcl|c217576_g1_i1|m.5259
lcl|c243527_g1_i1|m.31049
lcl|c229348_g1_i1|m.14183
lcl|c217621_g3_i1|m.5289
lcl|c217654_g5_i4|m.5303
lcl|c242934_g1_i4|m.30427
lcl|c217684_g1_i2|m.5317
lcl|c224166_g2_i1|m.9648
lcl|c236793_g3_i7|m.22527
lcl|c217701_g4_i1|m.5329
lcl|c199545_g1_i1|m.1080
lcl|c242671_g2_i1|m.30114
lcl|c242843_g2_i5|m.30275
lcl|c243402_g1_i3|m.30942
lcl|c217737_g4_i4|m.5348
lcl|c217776_g2_i5|m.5358
lcl|c217626_g1_i4|m.5292
lcl|c217777_g4_i6|m.5361
lcl|c236540_g4_i6|m.22225
lcl|c217808_g1_i5|m.5370
lcl|c238993_g4_i1|m.25158
lcl|c244219_g1_i1|m.31908
lcl|c217834_g1_i3|m.5399
lcl|c217887_g8_i2|m.5422
lcl|c181783_g1_i1|m.659
lcl|c217972_g1_i6|m.5456
lcl|c227952_g2_i1|m.12918
lcl|c204003_g1_i4|m.1363
lcl|c217525_g1_i1|m.5229
lcl|c199810_g1_i2|m.1089
lcl|c218032_g1_i1|m.5496
lcl|c213837_g2_i4|m.3221
lcl|c218043_g2_i3|m.5510
lcl|c218119_g1_i3|m.5570
lcl|c230489_g4_i1|m.15364
lcl|c218123_g3_i2|m.5572
lcl|c218175_g5_i2|m.5596
lcl|c234172_g3_i1|m.19574
lcl|c216330_g2_i4|m.4540
lcl|c218197_g1_i1|m.5617
lcl|c218223_g3_i1|m.5642
lcl|c237342_g3_i11|m.23180
lcl|c218374_g4_i1|m.5754
lcl|c218375_g1_i1|m.5756
lcl|c218445_g1_i1|m.5788
lcl|c218481_g4_i6|m.5811
lcl|c218494_g2_i5|m.5814
lcl|c218495_g1_i2|m.5815
lcl|c218580_g2_i1|m.5839
lcl|c218603_g6_i5|m.5857
lcl|c218696_g8_i2|m.5906
lcl|c218703_g1_i4|m.5907
lcl|c201155_g1_i1|m.1182
lcl|c218722_g1_i2|m.5914
lcl|c218748_g1_i1|m.5931
lcl|c218789_g1_i2|m.5965
lcl|c218814_g3_i7|m.5970
lcl|c218820_g4_i2|m.5974
lcl|c218599_g3_i2|m.5847
lcl|c218840_g4_i1|m.5985
lcl|c240662_g2_i10|m.27558
lcl|c218842_g3_i2|m.5986
lcl|c218842_g3_i2|m.5987
lcl|c218852_g5_i3|m.5993
lcl|c201157_g2_i3|m.1183
lcl|c218872_g2_i3|m.6012
lcl|c219090_g4_i2|m.6185
lcl|c230386_g2_i1|m.15223
lcl|c219163_g1_i3|m.6242
lcl|c238807_g3_i13|m.24923
lcl|c219184_g1_i2|m.6256
lcl|c219187_g1_i1|m.6258
lcl|c214964_g1_i1|m.3755
lcl|c219220_g4_i4|m.6283
lcl|c219274_g1_i6|m.6313
lcl|c143056_g1_i1|m.250
lcl|c201413_g4_i1|m.1201
lcl|c219485_g5_i3|m.6399
lcl|c219506_g5_i1|m.6423
lcl|c219564_g8_i2|m.6456
lcl|c219583_g2_i1|m.6468
lcl|c219601_g1_i1|m.6471
lcl|c219632_g2_i1|m.6493
lcl|c219636_g2_i1|m.6494
lcl|c219636_g2_i3|m.6495
lcl|c219659_g7_i1|m.6504
lcl|c219674_g1_i1|m.6511
lcl|c201696_g3_i1|m.1219
lcl|c219704_g3_i2|m.6534
lcl|c219759_g3_i3|m.6556
lcl|c219817_g1_i3|m.6593
lcl|c219828_g4_i5|m.6597
lcl|c219841_g6_i1|m.6610
lcl|c219842_g1_i1|m.6611
lcl|c219870_g5_i1|m.6620
lcl|c219901_g4_i1|m.6631
lcl|c220008_g2_i5|m.6705
lcl|c201793_g1_i1|m.1223
lcl|c220011_g4_i9|m.6707
lcl|c220050_g2_i1|m.6739
lcl|c220189_g1_i1|m.6796
lcl|c220191_g1_i1|m.6799
lcl|c220226_g2_i9|m.6827
lcl|c220236_g4_i1|m.6833
lcl|c220252_g1_i3|m.6839
lcl|c220300_g3_i1|m.6859
lcl|c220319_g5_i1|m.6862
lcl|c220380_g1_i3|m.6911
lcl|c202641_g1_i1|m.1266
lcl|c220475_g1_i1|m.6962
lcl|c220485_g3_i1|m.6974
lcl|c220577_g5_i1|m.7011
lcl|c220622_g1_i1|m.7032
lcl|c220638_g5_i1|m.7054
lcl|c220695_g1_i1|m.7091
lcl|c220748_g5_i2|m.7116
lcl|c220807_g2_i1|m.7165
lcl|c202763_g1_i2|m.1275
lcl|c220834_g8_i2|m.7193
lcl|c220845_g6_i1|m.7197
lcl|c220863_g2_i3|m.7207
lcl|c220896_g4_i6|m.7222
lcl|c220923_g2_i4|m.7240
lcl|c220937_g5_i7|m.7248
lcl|c220954_g1_i2|m.7267
lcl|c220963_g1_i1|m.7276
lcl|c221031_g2_i1|m.7336
lcl|c221039_g3_i2|m.7343
lcl|c203193_g1_i1|m.1308
lcl|c221077_g1_i1|m.7374
lcl|c221105_g4_i2|m.7402
lcl|c221114_g2_i1|m.7405
lcl|c221130_g3_i2|m.7408
lcl|c221189_g3_i1|m.7459
lcl|c221194_g2_i1|m.7463
lcl|c221205_g1_i1|m.7472
lcl|c221238_g1_i4|m.7502
lcl|c221281_g1_i1|m.7530
lcl|c221296_g1_i3|m.7550
lcl|c203735_g1_i1|m.1335
lcl|c221301_g3_i3|m.7552
lcl|c221340_g4_i1|m.7579
lcl|c221427_g1_i4|m.7617
lcl|c221444_g1_i1|m.7638
lcl|c221450_g9_i6|m.7639
lcl|c221464_g1_i3|m.7656
lcl|c221482_g2_i1|m.7668
lcl|c221514_g6_i1|m.7698
lcl|c221586_g4_i2|m.7745
lcl|c221593_g3_i1|m.7753
lcl|c221619_g2_i1|m.7763
lcl|c221649_g6_i2|m.7773
lcl|c221662_g2_i4|m.7775
lcl|c221694_g2_i1|m.7797
lcl|c221736_g1_i11|m.7820
lcl|c221753_g3_i7|m.7844
lcl|c221849_g1_i2|m.7917
lcl|c204019_g1_i1|m.1366
lcl|c221855_g2_i3|m.7925
lcl|c221890_g1_i1|m.7971
lcl|c221925_g1_i3|m.7988
lcl|c221967_g2_i3|m.8016
lcl|c221968_g1_i1|m.8017
lcl|c221971_g3_i2|m.8022
lcl|c222028_g1_i5|m.8060
lcl|c222117_g4_i1|m.8104
lcl|c222123_g3_i1|m.8109
lcl|c204436_g1_i1|m.1392
lcl|c222132_g1_i1|m.8115
lcl|c222179_g3_i2|m.8147
lcl|c222186_g2_i2|m.8151
lcl|c222196_g3_i1|m.8162
lcl|c222200_g1_i1|m.8165
lcl|c222253_g5_i4|m.8203
lcl|c222286_g2_i1|m.8232
lcl|c222301_g1_i3|m.8235
lcl|c222306_g8_i4|m.8236
lcl|c145576_g1_i1|m.265
lcl|c204885_g2_i1|m.1407
lcl|c222319_g4_i3|m.8243
lcl|c222323_g2_i2|m.8245
lcl|c222343_g4_i1|m.8262
lcl|c222353_g1_i1|m.8273
lcl|c222377_g6_i1|m.8283
lcl|c222386_g1_i1|m.8298
lcl|c222400_g6_i5|m.8305
lcl|c222420_g3_i2|m.8319
lcl|c205012_g1_i1|m.1420
lcl|c222436_g10_i1|m.8337
lcl|c222484_g2_i1|m.8393
lcl|c222526_g1_i2|m.8408
lcl|c222543_g3_i2|m.8418
lcl|c222546_g5_i2|m.8425
lcl|c222548_g1_i3|m.8426
lcl|c222555_g2_i4|m.8428
lcl|c222581_g2_i12|m.8451
lcl|c222581_g2_i12|m.8452
lcl|c205368_g1_i5|m.1453
lcl|c222653_g7_i1|m.8496
lcl|c222691_g4_i1|m.8535
lcl|c222693_g1_i1|m.8538
lcl|c222727_g3_i2|m.8582
lcl|c222750_g1_i9|m.8600
lcl|c222798_g5_i3|m.8621
lcl|c222808_g2_i2|m.8627
lcl|c222818_g1_i1|m.8630
lcl|c222837_g1_i1|m.8646
lcl|c222852_g4_i5|m.8661
lcl|c222909_g1_i1|m.8698
lcl|c222929_g2_i3|m.8717
lcl|c222937_g2_i3|m.8724
lcl|c222943_g1_i1|m.8725
lcl|c222943_g1_i2|m.8726
lcl|c222950_g5_i5|m.8735
lcl|c222957_g1_i2|m.8747
lcl|c223053_g2_i4|m.8839
lcl|c205488_g1_i1|m.1464
lcl|c223077_g2_i1|m.8858
lcl|c223139_g3_i2|m.8898
lcl|c223200_g1_i1|m.8933
lcl|c223205_g4_i1|m.8934
lcl|c223214_g1_i1|m.8951
lcl|c223247_g3_i6|m.8971
lcl|c223275_g1_i2|m.8992
lcl|c223317_g1_i2|m.9033
lcl|c223351_g1_i1|m.9046
lcl|c205554_g2_i2|m.1468
lcl|c223425_g3_i3|m.9106
lcl|c223433_g6_i1|m.9115
lcl|c223475_g2_i9|m.9154
lcl|c223494_g6_i1|m.9164
lcl|c223577_g1_i1|m.9214
lcl|c223583_g5_i3|m.9218
lcl|c223597_g3_i2|m.9232
lcl|c223604_g1_i1|m.9235
lcl|c223616_g1_i1|m.9252
lcl|c205697_g1_i1|m.1481
lcl|c223646_g1_i2|m.9273
lcl|c223673_g1_i3|m.9293
lcl|c223689_g4_i1|m.9313
lcl|c223710_g5_i3|m.9324
lcl|c223716_g4_i1|m.9328
lcl|c223761_g4_i15|m.9358
lcl|c223775_g7_i2|m.9373
lcl|c223870_g1_i6|m.9447
lcl|c205713_g1_i1|m.1484
lcl|c223975_g3_i3|m.9516
lcl|c223983_g2_i8|m.9524
lcl|c223990_g2_i1|m.9532
lcl|c224015_g2_i1|m.9549
lcl|c224026_g2_i1|m.9560
lcl|c224026_g2_i4|m.9562
lcl|c224042_g7_i2|m.9570
lcl|c224106_g1_i3|m.9604
lcl|c224156_g3_i2|m.9641
lcl|c224182_g8_i1|m.9652
lcl|c224201_g3_i8|m.9658
lcl|c224242_g3_i7|m.9677
lcl|c224289_g1_i1|m.9705
lcl|c224310_g1_i1|m.9717
lcl|c224332_g10_i1|m.9746
lcl|c224365_g3_i1|m.9762
lcl|c224371_g5_i1|m.9765
lcl|c224405_g1_i1|m.9772
lcl|c224432_g1_i4|m.9787
lcl|c206417_g1_i2|m.1538
lcl|c224456_g4_i3|m.9819
lcl|c224457_g1_i1|m.9820
lcl|c224488_g1_i1|m.9847
lcl|c224493_g2_i5|m.9854
lcl|c224556_g6_i1|m.9931
lcl|c224557_g2_i1|m.9933
lcl|c224589_g7_i1|m.9992
lcl|c224597_g3_i1|m.10003
lcl|c224670_g2_i1|m.10052
lcl|c160676_g1_i1|m.404
lcl|c206531_g1_i1|m.1558
lcl|c224672_g1_i1|m.10055
lcl|c224672_g2_i1|m.10058
lcl|c224781_g7_i2|m.10124
lcl|c224785_g4_i3|m.10127
lcl|c224812_g3_i3|m.10152
lcl|c224848_g2_i1|m.10169
lcl|c224866_g1_i2|m.10191
lcl|c224880_g4_i1|m.10208
lcl|c224918_g1_i1|m.10239
lcl|c206556_g1_i2|m.1565
lcl|c225015_g2_i1|m.10306
lcl|c225098_g3_i9|m.10362
lcl|c225110_g1_i1|m.10369
lcl|c225144_g2_i3|m.10400
lcl|c225172_g3_i1|m.10424
lcl|c225266_g1_i7|m.10481
lcl|c225267_g2_i1|m.10483
lcl|c225281_g3_i2|m.10487
lcl|c225308_g1_i1|m.10501
lcl|c206819_g1_i1|m.1595
lcl|c225308_g1_i4|m.10503
lcl|c225323_g2_i2|m.10522
lcl|c225334_g2_i2|m.10532
lcl|c225352_g1_i1|m.10544
lcl|c225359_g3_i1|m.10554
lcl|c225394_g4_i2|m.10584
lcl|c225544_g1_i2|m.10720
lcl|c225590_g2_i4|m.10752
lcl|c225618_g2_i6|m.10783
lcl|c207254_g1_i2|m.1628
lcl|c225632_g3_i1|m.10790
lcl|c225668_g5_i2|m.10809
lcl|c225713_g4_i1|m.10851
lcl|c225713_g4_i1|m.10853
lcl|c225761_g6_i1|m.10925
lcl|c225782_g2_i1|m.10939
lcl|c225822_g2_i4|m.10975
lcl|c207709_g1_i1|m.1673
lcl|c225829_g1_i1|m.10978
lcl|c225844_g2_i3|m.10984
lcl|c225849_g2_i3|m.10990
lcl|c225852_g2_i3|m.10992
lcl|c225867_g3_i1|m.11000
lcl|c225875_g4_i2|m.11006
lcl|c225972_g1_i1|m.11091
lcl|c225978_g1_i10|m.11104
lcl|c207877_g2_i1|m.1696
lcl|c226005_g4_i1|m.11126
lcl|c226044_g1_i4|m.11148
lcl|c226046_g1_i2|m.11150
lcl|c226084_g3_i2|m.11194
lcl|c226099_g2_i1|m.11211
lcl|c226102_g6_i1|m.11215
lcl|c226138_g1_i1|m.11235
lcl|c207931_g1_i1|m.1711
lcl|c226138_g2_i1|m.11236
lcl|c226155_g2_i3|m.11249
lcl|c226211_g2_i1|m.11296
lcl|c226212_g1_i3|m.11297
lcl|c226216_g1_i2|m.11298
lcl|c226230_g2_i2|m.11305
lcl|c226252_g1_i1|m.11336
lcl|c226287_g1_i1|m.11356
lcl|c207960_g1_i1|m.1712
lcl|c226287_g1_i2|m.11357
lcl|c226332_g1_i2|m.11417
lcl|c226346_g1_i1|m.11426
lcl|c226389_g3_i1|m.11454
lcl|c226409_g2_i1|m.11459
lcl|c226414_g3_i1|m.11460
lcl|c226450_g3_i4|m.11486
lcl|c226505_g3_i2|m.11536
lcl|c226593_g2_i1|m.11607
lcl|c226627_g2_i3|m.11631
lcl|c207967_g2_i1|m.1713
lcl|c226683_g4_i10|m.11705
lcl|c226723_g5_i2|m.11731
lcl|c226730_g3_i1|m.11735
lcl|c226774_g3_i2|m.11777
lcl|c226786_g3_i2|m.11789
lcl|c226846_g2_i3|m.11856
lcl|c226898_g4_i1|m.11913
lcl|c226903_g2_i4|m.11918
lcl|c226904_g2_i1|m.11919
lcl|c208095_g4_i3|m.1732
lcl|c226916_g4_i1|m.11929
lcl|c226917_g1_i2|m.11940
lcl|c226944_g1_i1|m.11952
lcl|c226971_g4_i11|m.11980
lcl|c226990_g1_i2|m.12024
lcl|c226999_g3_i5|m.12032
lcl|c227009_g2_i1|m.12051
lcl|c227063_g4_i1|m.12098
lcl|c227084_g3_i1|m.12128
lcl|c162537_g1_i2|m.418
lcl|c208317_g1_i1|m.1768
lcl|c227136_g2_i8|m.12192
lcl|c227186_g4_i4|m.12220
lcl|c227188_g1_i1|m.12222
lcl|c227202_g1_i3|m.12234
lcl|c227266_g1_i1|m.12288
lcl|c227267_g3_i2|m.12289
lcl|c227270_g10_i4|m.12291
lcl|c227290_g1_i5|m.12317
lcl|c227293_g2_i4|m.12320
lcl|c208387_g1_i1|m.1778
lcl|c227297_g1_i3|m.12321
lcl|c227322_g4_i4|m.12336
lcl|c227361_g2_i9|m.12363
lcl|c227365_g1_i1|m.12366
lcl|c227372_g6_i3|m.12377
lcl|c227396_g2_i4|m.12400
lcl|c227414_g2_i1|m.12410
lcl|c227531_g4_i11|m.12520
lcl|c227533_g4_i2|m.12539
lcl|c227543_g1_i1|m.12562
lcl|c208684_g1_i2|m.1827
lcl|c227543_g1_i4|m.12563
lcl|c227548_g3_i11|m.12568
lcl|c227571_g1_i1|m.12592
lcl|c227586_g2_i2|m.12601
lcl|c227657_g3_i1|m.12650
lcl|c227676_g2_i3|m.12666
lcl|c227683_g10_i1|m.12674
lcl|c227702_g4_i1|m.12691
lcl|c227720_g2_i2|m.12706
lcl|c227721_g2_i2|m.12707
lcl|c208691_g4_i1|m.1828
lcl|c227726_g1_i1|m.12708
lcl|c227735_g3_i4|m.12716
lcl|c227738_g1_i4|m.12717
lcl|c227772_g1_i1|m.12754
lcl|c227794_g1_i1|m.12770
lcl|c227847_g4_i2|m.12829
lcl|c227852_g1_i7|m.12835
lcl|c227928_g3_i2|m.12899
lcl|c227937_g1_i7|m.12905
lcl|c208878_g1_i2|m.1846
lcl|c227963_g7_i1|m.12929
lcl|c227969_g2_i1|m.12933
lcl|c227969_g5_i2|m.12934
lcl|c228029_g3_i2|m.12983
lcl|c228038_g3_i1|m.12994
lcl|c228056_g1_i4|m.13006
lcl|c228092_g3_i1|m.13033
lcl|c228109_g2_i1|m.13051
lcl|c228121_g2_i2|m.13058
lcl|c208940_g4_i1|m.1863
lcl|c228151_g1_i2|m.13084
lcl|c228205_g4_i2|m.13127
lcl|c228207_g1_i1|m.13128
lcl|c228314_g1_i1|m.13228
lcl|c228317_g4_i1|m.13231
lcl|c228325_g7_i1|m.13245
lcl|c228330_g5_i1|m.13250
lcl|c228331_g1_i1|m.13257
lcl|c228380_g1_i2|m.13296
lcl|c209114_g1_i1|m.1902
lcl|c228390_g1_i2|m.13299
lcl|c228456_g2_i1|m.13345
lcl|c228461_g1_i2|m.13347
lcl|c228497_g4_i1|m.13369
lcl|c228506_g1_i2|m.13379
lcl|c228529_g1_i1|m.13404
lcl|c228583_g3_i2|m.13440
lcl|c228583_g6_i1|m.13441
lcl|c228611_g1_i2|m.13461
lcl|c209191_g2_i1|m.1916
lcl|c228611_g7_i1|m.13463
lcl|c228623_g6_i3|m.13470
lcl|c228665_g3_i2|m.13504
lcl|c228709_g4_i2|m.13577
lcl|c228742_g3_i1|m.13609
lcl|c228773_g1_i1|m.13638
lcl|c228789_g1_i1|m.13647
lcl|c228825_g1_i1|m.13684
lcl|c209256_g1_i1|m.1929
lcl|c228838_g1_i2|m.13701
lcl|c228847_g1_i2|m.13712
lcl|c228864_g3_i2|m.13732
lcl|c228868_g10_i1|m.13735
lcl|c228869_g1_i2|m.13736
lcl|c228886_g2_i3|m.13746
lcl|c228904_g1_i5|m.13760
lcl|c228940_g3_i1|m.13807
lcl|c209298_g1_i1|m.1944
lcl|c228955_g3_i2|m.13813
lcl|c228972_g3_i3|m.13832
lcl|c228984_g1_i2|m.13846
lcl|c229021_g1_i1|m.13887
lcl|c229025_g3_i1|m.13888
lcl|c229032_g2_i1|m.13894
lcl|c229032_g2_i3|m.13895
lcl|c229032_g2_i5|m.13896
lcl|c229041_g1_i1|m.13901
lcl|c209326_g4_i1|m.1952
lcl|c229050_g10_i2|m.13907
lcl|c229055_g1_i1|m.13922
lcl|c229109_g1_i2|m.13969
lcl|c229207_g3_i3|m.14046
lcl|c229261_g2_i4|m.14109
lcl|c229276_g4_i1|m.14123
lcl|c229298_g2_i1|m.14136
lcl|c229310_g3_i5|m.14142
lcl|c229310_g3_i5|m.14143
lcl|c209385_g1_i1|m.1957
lcl|c229348_g3_i2|m.14185
lcl|c229351_g6_i1|m.14197
lcl|c229353_g1_i2|m.14200
lcl|c229422_g1_i2|m.14250
lcl|c229422_g1_i9|m.14251
lcl|c229426_g2_i2|m.14255
lcl|c229426_g2_i4|m.14256
lcl|c229445_g3_i3|m.14271
lcl|c229461_g3_i2|m.14279
lcl|c209492_g1_i1|m.1979
lcl|c229482_g2_i3|m.14286
lcl|c229532_g3_i4|m.14360
lcl|c229534_g2_i1|m.14362
lcl|c229541_g1_i10|m.14378
lcl|c229541_g1_i10|m.14379
lcl|c229550_g1_i3|m.14392
lcl|c229563_g2_i2|m.14411
lcl|c229579_g3_i1|m.14426
lcl|c229592_g3_i11|m.14442
lcl|c209513_g1_i2|m.1987
lcl|c229623_g1_i7|m.14454
lcl|c229658_g3_i1|m.14486
lcl|c229667_g6_i8|m.14511
lcl|c229676_g1_i1|m.14524
lcl|c229705_g1_i1|m.14556
lcl|c229735_g7_i1|m.14573
lcl|c229808_g3_i3|m.14640
lcl|c229828_g3_i5|m.14665
lcl|c229833_g1_i3|m.14669
lcl|c229853_g1_i1|m.14683
lcl|c229881_g6_i6|m.14719
lcl|c229904_g1_i2|m.14752
lcl|c229917_g4_i4|m.14770
lcl|c229939_g1_i1|m.14795
lcl|c230000_g8_i2|m.14843
lcl|c230026_g4_i1|m.14873
lcl|c209565_g1_i2|m.1999
lcl|c230032_g6_i1|m.14874
lcl|c230034_g1_i1|m.14877
lcl|c230065_g1_i2|m.14908
lcl|c230110_g2_i2|m.14961
lcl|c230136_g1_i1|m.14983
lcl|c230163_g1_i1|m.15005
lcl|c230171_g1_i1|m.15015
lcl|c230175_g2_i2|m.15021
lcl|c230178_g1_i2|m.15028
lcl|c209565_g1_i2|m.2000
lcl|c230184_g2_i3|m.15031
lcl|c230192_g3_i5|m.15041
lcl|c230197_g3_i5|m.15044
lcl|c230270_g1_i2|m.15107
lcl|c230296_g1_i1|m.15135
lcl|c230355_g4_i3|m.15198
lcl|c230406_g3_i1|m.15260
lcl|c230411_g4_i1|m.15261
lcl|c230414_g1_i1|m.15275
lcl|c230498_g3_i2|m.15368
lcl|c230551_g2_i3|m.15412
lcl|c230632_g1_i6|m.15498
lcl|c230725_g5_i4|m.15553
lcl|c230758_g1_i1|m.15596
lcl|c230771_g2_i1|m.15607
lcl|c230862_g3_i1|m.15714
lcl|c230890_g3_i2|m.15750
lcl|c230902_g1_i11|m.15765
lcl|c209757_g1_i1|m.2044
lcl|c230944_g4_i1|m.15814
lcl|c230960_g1_i5|m.15839
lcl|c230993_g3_i4|m.15866
lcl|c231052_g3_i3|m.15929
lcl|c231068_g6_i2|m.15939
lcl|c231085_g3_i1|m.15955
lcl|c231225_g3_i3|m.16055
lcl|c231252_g2_i1|m.16075
lcl|c209846_g4_i1|m.2055
lcl|c231257_g1_i8|m.16086
lcl|c231281_g6_i3|m.16097
lcl|c231364_g6_i1|m.16162
lcl|c231378_g1_i2|m.16165
lcl|c231445_g1_i1|m.16259
lcl|c231460_g1_i4|m.16283
lcl|c231462_g1_i10|m.16284
lcl|c231601_g3_i1|m.16437
lcl|c231615_g6_i2|m.16452
lcl|c164490_g1_i1|m.440
lcl|c210226_g1_i1|m.2139
lcl|c231621_g3_i3|m.16453
lcl|c231694_g3_i2|m.16524
lcl|c231698_g2_i1|m.16532
lcl|c231732_g6_i1|m.16569
lcl|c231737_g1_i3|m.16576
lcl|c231738_g2_i1|m.16579
lcl|c231739_g1_i3|m.16580
lcl|c231789_g3_i2|m.16623
lcl|c231808_g9_i1|m.16644
lcl|c231811_g3_i1|m.16645
lcl|c210228_g3_i1|m.2141
lcl|c231821_g3_i1|m.16651
lcl|c231826_g8_i1|m.16654
lcl|c231881_g1_i2|m.16748
lcl|c231884_g4_i1|m.16750
lcl|c231891_g1_i1|m.16759
lcl|c231904_g1_i7|m.16777
lcl|c231929_g5_i1|m.16788
lcl|c231929_g5_i4|m.16789
lcl|c231931_g2_i1|m.16792
lcl|c231967_g1_i2|m.16842
lcl|c231976_g1_i1|m.16853
lcl|c231981_g4_i6|m.16864
lcl|c231996_g3_i3|m.16899
lcl|c231997_g2_i3|m.16900
lcl|c232008_g1_i2|m.16909
lcl|c232095_g2_i1|m.16982
lcl|c232105_g3_i1|m.16994
lcl|c232108_g1_i1|m.16997
lcl|c232108_g1_i2|m.16999
lcl|c232133_g1_i5|m.17039
lcl|c232137_g2_i1|m.17041
lcl|c232221_g3_i2|m.17155
lcl|c232232_g4_i1|m.17169
lcl|c232241_g6_i1|m.17171
lcl|c232241_g6_i3|m.17173
lcl|c232242_g3_i1|m.17174
lcl|c232294_g5_i11|m.17226
lcl|c232294_g5_i11|m.17227
lcl|c210331_g2_i2|m.2158
lcl|c232338_g2_i2|m.17255
lcl|c232350_g3_i1|m.17265
lcl|c232381_g2_i3|m.17311
lcl|c232401_g7_i2|m.17338
lcl|c232410_g1_i2|m.17346
lcl|c232424_g1_i6|m.17358
lcl|c232440_g3_i1|m.17372
lcl|c232511_g1_i6|m.17448
lcl|c232521_g1_i4|m.17458
lcl|c210338_g2_i1|m.2161
lcl|c232537_g3_i1|m.17484
lcl|c232540_g2_i1|m.17495
lcl|c232541_g3_i1|m.17498
lcl|c232555_g1_i2|m.17516
lcl|c232587_g1_i15|m.17560
lcl|c232638_g9_i1|m.17634
lcl|c232653_g3_i1|m.17643
lcl|c232676_g1_i2|m.17666
lcl|c232684_g7_i2|m.17670
lcl|c210342_g3_i4|m.2163
lcl|c232684_g7_i4|m.17671
lcl|c232716_g1_i2|m.17708
lcl|c232736_g7_i11|m.17724
lcl|c232737_g3_i2|m.17725
lcl|c232744_g5_i2|m.17733
lcl|c232745_g5_i1|m.17734
lcl|c232769_g4_i2|m.17751
lcl|c232783_g1_i1|m.17764
lcl|c210398_g1_i3|m.2174
lcl|c232791_g2_i3|m.17780
lcl|c232804_g4_i5|m.17788
lcl|c232813_g1_i6|m.17800
lcl|c232813_g3_i2|m.17801
lcl|c232821_g1_i1|m.17807
lcl|c232834_g2_i9|m.17824
lcl|c232842_g1_i1|m.17827
lcl|c232847_g2_i2|m.17831
lcl|c232847_g6_i1|m.17834
lcl|c232854_g3_i11|m.17840
lcl|c232868_g2_i13|m.17849
lcl|c232949_g3_i7|m.17939
lcl|c232983_g2_i2|m.17991
lcl|c232986_g1_i4|m.17993
lcl|c233001_g2_i4|m.18006
lcl|c233033_g3_i4|m.18064
lcl|c233042_g5_i1|m.18070
lcl|c233061_g7_i1|m.18094
lcl|c233068_g2_i1|m.18098
lcl|c233068_g2_i3|m.18101
lcl|c233135_g1_i3|m.18177
lcl|c233142_g2_i1|m.18198
lcl|c233143_g2_i13|m.18204
lcl|c233156_g1_i1|m.18213
lcl|c233181_g4_i3|m.18256
lcl|c233212_g2_i5|m.18273
lcl|c233212_g2_i6|m.18275
lcl|c167783_g1_i1|m.480
lcl|c210579_g1_i2|m.2209
lcl|c233247_g1_i1|m.18311
lcl|c233287_g2_i1|m.18368
lcl|c233339_g2_i12|m.18429
lcl|c233348_g2_i1|m.18445
[truncated: 96 more rows]

## Sheet: D_Proteins_T2.S
Protein
lcl|c169761_g1_i1|m.505
lcl|c235850_g2_i3|m.21382
lcl|c235861_g2_i5|m.21394
lcl|c235959_g6_i1|m.21503
lcl|c235993_g2_i2|m.21545
lcl|c236015_g2_i16|m.21586
lcl|c236024_g3_i2|m.21588
lcl|c236035_g1_i2|m.21599
lcl|c236101_g5_i2|m.21702
lcl|c236120_g2_i1|m.21731
lcl|c236131_g3_i3|m.21740
lcl|c236134_g1_i2|m.21741
lcl|c236135_g4_i5|m.21746
lcl|c236172_g4_i2|m.21786
lcl|c211368_g3_i1|m.2426
lcl|c236286_g4_i1|m.21959
lcl|c236351_g2_i1|m.22019
lcl|c236389_g1_i1|m.22061
lcl|c236507_g1_i6|m.22186
lcl|c236523_g2_i4|m.22204
lcl|c211415_g1_i1|m.2432
lcl|c236527_g2_i1|m.22205
lcl|c236562_g3_i1|m.22244
lcl|c236655_g1_i2|m.22362
lcl|c236666_g2_i2|m.22384
lcl|c236706_g2_i4|m.22417
lcl|c236813_g3_i2|m.22564
lcl|c236822_g3_i10|m.22574
lcl|c236844_g2_i5|m.22607
lcl|c211436_g1_i2|m.2434
lcl|c236878_g1_i2|m.22651
lcl|c236923_g1_i10|m.22692
lcl|c237097_g2_i1|m.22905
lcl|c237098_g1_i2|m.22911
lcl|c237130_g1_i4|m.22955
lcl|c237136_g1_i1|m.22958
lcl|c237136_g3_i1|m.22962
lcl|c237191_g2_i5|m.23010
lcl|c211551_g6_i4|m.2453
lcl|c237207_g2_i2|m.23024
lcl|c237211_g6_i4|m.23025
lcl|c237215_g1_i1|m.23031
lcl|c237320_g5_i2|m.23157
lcl|c237387_g1_i1|m.23217
lcl|c237405_g1_i2|m.23236
lcl|c237440_g3_i2|m.23273
lcl|c237490_g5_i6|m.23318
lcl|c237560_g2_i1|m.23397
lcl|c237587_g5_i1|m.23455
lcl|c237591_g3_i1|m.23457
lcl|c237591_g3_i4|m.23458
lcl|c237613_g1_i3|m.23496
lcl|c211563_g8_i2|m.2460
lcl|c237702_g1_i1|m.23627
lcl|c237753_g2_i2|m.23709
lcl|c237832_g1_i6|m.23803
lcl|c237891_g2_i2|m.23861
lcl|c237894_g6_i1|m.23869
lcl|c237953_g4_i1|m.23928
lcl|c237969_g1_i5|m.23942
lcl|c238002_g5_i8|m.23981
lcl|c211604_g1_i1|m.2470
lcl|c238048_g5_i2|m.24043
lcl|c238052_g1_i4|m.24050
lcl|c238085_g2_i5|m.24082
lcl|c238173_g3_i3|m.24203
lcl|c238175_g2_i3|m.24204
lcl|c238200_g3_i4|m.24238
lcl|c238338_g4_i1|m.24403
lcl|c211615_g1_i2|m.2471
lcl|c238365_g3_i1|m.24425
lcl|c238372_g5_i2|m.24429
lcl|c238378_g1_i1|m.24441
lcl|c238385_g2_i1|m.24454
lcl|c238409_g2_i5|m.24505
lcl|c238537_g2_i7|m.24631
lcl|c211660_g1_i1|m.2486
lcl|c238560_g5_i2|m.24666
lcl|c238572_g3_i3|m.24677
lcl|c238581_g1_i1|m.24692
lcl|c238657_g1_i1|m.24764
lcl|c238662_g3_i1|m.24774
lcl|c238663_g1_i2|m.24780
lcl|c238664_g1_i2|m.24781
lcl|c238692_g2_i2|m.24838
lcl|c238756_g1_i5|m.24891
lcl|c238756_g1_i5|m.24892
lcl|c238814_g3_i2|m.24928
lcl|c238826_g2_i1|m.24957
lcl|c238833_g1_i2|m.24965
lcl|c211774_g2_i1|m.2538
lcl|c238903_g3_i2|m.25053
lcl|c239007_g1_i1|m.25175
lcl|c239132_g4_i1|m.25330
lcl|c239139_g1_i2|m.25341
lcl|c239139_g1_i7|m.25343
lcl|c239272_g3_i1|m.25542
lcl|c211861_g1_i1|m.2554
lcl|c239275_g1_i1|m.25549
lcl|c239343_g4_i4|m.25612
lcl|c239381_g2_i1|m.25706
lcl|c239392_g1_i1|m.25726
lcl|c239406_g1_i2|m.25742
lcl|c239409_g1_i2|m.25747
lcl|c239444_g1_i9|m.25795
lcl|c239561_g1_i2|m.25969
lcl|c239610_g1_i3|m.26053
lcl|c239652_g2_i1|m.26096
lcl|c239662_g2_i17|m.26116
lcl|c239670_g2_i1|m.26141
lcl|c239673_g1_i3|m.26150
lcl|c239684_g3_i6|m.26167
lcl|c239719_g1_i1|m.26241
lcl|c239813_g5_i1|m.26346
lcl|c239887_g1_i1|m.26471
lcl|c239893_g3_i11|m.26493
lcl|c239894_g3_i2|m.26508
lcl|c239962_g2_i3|m.26573
lcl|c212026_g3_i1|m.2608
lcl|c239963_g4_i3|m.26575
lcl|c240014_g2_i1|m.26649
lcl|c240053_g2_i1|m.26700
lcl|c240104_g7_i1|m.26774
lcl|c240175_g3_i1|m.26871
lcl|c240251_g4_i1|m.26961
lcl|c212126_g1_i2|m.2626
lcl|c240260_g2_i7|m.26976
lcl|c240274_g5_i1|m.26994
lcl|c240300_g3_i7|m.27053
lcl|c240300_g3_i7|m.27054
lcl|c240327_g5_i1|m.27085
lcl|c240357_g2_i2|m.27113
lcl|c240440_g6_i6|m.27259
lcl|c240453_g2_i2|m.27266
lcl|c240476_g1_i3|m.27281
lcl|c240483_g2_i2|m.27308
lcl|c240488_g1_i6|m.27324
lcl|c240532_g3_i2|m.27393
lcl|c240624_g3_i1|m.27496
lcl|c240628_g3_i3|m.27511
lcl|c240630_g1_i1|m.27515
lcl|c240640_g2_i1|m.27531
lcl|c240688_g3_i1|m.27609
lcl|c240709_g1_i1|m.27629
lcl|c240739_g2_i5|m.27680
lcl|c212237_g2_i1|m.2659
lcl|c240761_g2_i10|m.27710
lcl|c240794_g1_i2|m.27749
lcl|c240794_g1_i3|m.27750
lcl|c240833_g3_i3|m.27779
lcl|c240857_g5_i1|m.27819
lcl|c240877_g2_i2|m.27858
lcl|c240904_g2_i1|m.27923
lcl|c240989_g2_i1|m.28022
lcl|c241031_g1_i1|m.28098
lcl|c241047_g4_i1|m.28118
lcl|c241090_g1_i1|m.28152
lcl|c241114_g1_i2|m.28195
lcl|c241148_g1_i6|m.28240
lcl|c241194_g4_i1|m.28300
lcl|c241222_g2_i5|m.28326
lcl|c241251_g1_i1|m.28362
lcl|c212462_g1_i1|m.2727
lcl|c241269_g1_i2|m.28376
lcl|c241299_g1_i6|m.28386
lcl|c241317_g4_i4|m.28427
lcl|c241349_g1_i1|m.28471
lcl|c241389_g1_i2|m.28515
lcl|c241409_g1_i4|m.28539
lcl|c212602_g3_i5|m.2781
lcl|c241444_g1_i2|m.28576
lcl|c241466_g2_i10|m.28615
lcl|c241498_g6_i2|m.28662
lcl|c241502_g2_i1|m.28666
lcl|c241579_g2_i1|m.28728
lcl|c241579_g2_i3|m.28729
lcl|c212652_g1_i3|m.2790
lcl|c241630_g2_i5|m.28790
lcl|c241649_g4_i1|m.28823
lcl|c241650_g2_i3|m.28825
lcl|c241650_g2_i3|m.28826
lcl|c241754_g2_i1|m.28913
lcl|c241854_g3_i2|m.29002
lcl|c241873_g2_i3|m.29039
lcl|c241909_g1_i6|m.29130
lcl|c241909_g2_i3|m.29133
lcl|c241916_g1_i1|m.29146
lcl|c241966_g1_i1|m.29199
lcl|c242001_g1_i2|m.29236
lcl|c242066_g1_i1|m.29327
lcl|c242074_g1_i4|m.29345
lcl|c242089_g1_i1|m.29373
lcl|c242139_g4_i2|m.29446
lcl|c242185_g2_i2|m.29491
lcl|c242193_g2_i1|m.29501
lcl|c242257_g2_i2|m.29551
lcl|c242277_g7_i2|m.29564
lcl|c242362_g2_i1|m.29700
lcl|c212727_g5_i1|m.2822
lcl|c242373_g3_i2|m.29725
lcl|c242381_g1_i1|m.29746
lcl|c242419_g1_i1|m.29781
lcl|c242527_g2_i1|m.29909
lcl|c242541_g2_i5|m.29922
lcl|c242561_g4_i1|m.29954
lcl|c242581_g1_i1|m.29984
lcl|c242644_g1_i1|m.30082
lcl|c242743_g1_i1|m.30188
lcl|c242793_g1_i1|m.30226
lcl|c242793_g1_i1|m.30227
lcl|c242803_g1_i3|m.30250
lcl|c242839_g1_i1|m.30267
lcl|c212821_g1_i2|m.2859
lcl|c242839_g1_i1|m.30268
lcl|c242878_g1_i4|m.30326
lcl|c242885_g1_i1|m.30332
lcl|c242894_g3_i1|m.30343
lcl|c242924_g1_i1|m.30399
lcl|c242974_g2_i1|m.30459
lcl|c212826_g3_i1|m.2861
lcl|c243004_g1_i1|m.30509
lcl|c243010_g3_i1|m.30515
lcl|c243015_g1_i1|m.30516
lcl|c243086_g4_i2|m.30593
lcl|c243117_g1_i1|m.30639
lcl|c179773_g1_i1|m.636
lcl|c243149_g1_i2|m.30670
lcl|c243154_g1_i1|m.30688
lcl|c243228_g1_i1|m.30729
lcl|c243308_g5_i1|m.30798
lcl|c243349_g1_i4|m.30872
lcl|c243371_g1_i1|m.30909
lcl|c243397_g1_i1|m.30938
lcl|c243429_g2_i2|m.30976
lcl|c212937_g3_i2|m.2900
lcl|c243503_g5_i1|m.31038
lcl|c243506_g1_i6|m.31041
lcl|c243516_g2_i1|m.31047
lcl|c243554_g1_i5|m.31071
lcl|c243614_g4_i2|m.31123
lcl|c243628_g3_i2|m.31151
lcl|c243633_g2_i1|m.31165
lcl|c243633_g2_i1|m.31166
lcl|c243654_g1_i2|m.31195
lcl|c243671_g5_i1|m.31222
lcl|c243673_g1_i1|m.31225
lcl|c243724_g1_i1|m.31250
lcl|c243765_g1_i1|m.31282
lcl|c243774_g1_i2|m.31291
lcl|c243791_g1_i1|m.31323
lcl|c213022_g4_i5|m.2921
lcl|c243799_g1_i1|m.31328
lcl|c243893_g1_i1|m.31474
lcl|c243909_g1_i1|m.31505
lcl|c243935_g1_i3|m.31546
lcl|c243938_g2_i1|m.31548
lcl|c243954_g3_i1|m.31569
lcl|c213072_g1_i1|m.2941
lcl|c244055_g1_i3|m.31694
lcl|c244084_g2_i1|m.31724
lcl|c244126_g1_i2|m.31771
lcl|c244145_g1_i1|m.31801
lcl|c244164_g1_i1|m.31837
lcl|c244169_g2_i1|m.31846
lcl|c244173_g1_i4|m.31852
lcl|c244176_g3_i1|m.31854
lcl|c213117_g1_i3|m.2966
lcl|c244197_g2_i1|m.31877
lcl|c244235_g1_i2|m.31919
lcl|c244249_g2_i1|m.31932
lcl|c244255_g3_i1|m.31943
lcl|c244259_g1_i1|m.31949
lcl|c244264_g3_i1|m.31952
lcl|c244278_g1_i1|m.31973
lcl|c213147_g4_i1|m.2980
lcl|c244315_g1_i2|m.32024
lcl|c244324_g2_i1|m.32048
lcl|c244350_g3_i3|m.32077
lcl|c244364_g1_i1|m.32091
lcl|c244396_g1_i1|m.32137
lcl|c244407_g1_i3|m.32143
lcl|c244439_g1_i1|m.32192
lcl|c244441_g1_i1|m.32200
lcl|c213160_g2_i5|m.2982
lcl|c244452_g2_i2|m.32209
lcl|c244474_g3_i1|m.32253
lcl|c244488_g3_i1|m.32282
lcl|c244489_g1_i1|m.32283
lcl|c244508_g1_i1|m.32310
lcl|c65293_g1_i1|m.32646
lcl|c81884_g1_i1|m.32679
lcl|c213262_g2_i4|m.3006
lcl|c188073_g1_i1|m.763
lcl|c195747_g2_i1|m.945
lcl|c243887_g1_i1|m.31460
lcl|c201441_g1_i1|m.1204
lcl|c202129_g1_i1|m.1242
lcl|c213278_g3_i2|m.3010
lcl|c202472_g1_i1|m.1259
lcl|c202894_g5_i1|m.1285
lcl|c203483_g1_i2|m.1328
lcl|c204986_g3_i2|m.1414
lcl|c205358_g1_i2|m.1452
lcl|c206427_g2_i4|m.1541
lcl|c206859_g1_i1|m.1600
lcl|c236885_g1_i5|m.22663
lcl|c236885_g1_i7|m.22665
lcl|c236885_g1_i3|m.22659
lcl|c207332_g2_i2|m.1633
lcl|c182463_g1_i1|m.663
lcl|c208130_g1_i1|m.1735
lcl|c208140_g2_i1|m.1739
lcl|c209131_g1_i2|m.1905
lcl|c209570_g1_i3|m.2003
lcl|c210031_g1_i2|m.2100
lcl|c210253_g1_i2|m.2149
lcl|c243393_g3_i1|m.30930
lcl|c223677_g1_i1|m.9303
lcl|c224624_g4_i1|m.10025
lcl|c224624_g2_i1|m.10023
lcl|c235513_g2_i1|m.20994
lcl|c222682_g3_i7|m.8525
lcl|c229067_g1_i6|m.13938
lcl|c235115_g6_i1|m.20588
lcl|c244515_g4_i1|m.32348
lcl|c231210_g4_i4|m.16042
lcl|c219953_g4_i1|m.6659
lcl|c220204_g2_i2|m.6810
lcl|c222854_g1_i1|m.8663
lcl|c214584_g4_i1|m.3540
lcl|c220736_g3_i1|m.7111
lcl|c233257_g5_i1|m.18320
lcl|c229067_g1_i3|m.13935
lcl|c226414_g7_i1|m.11461
lcl|c210423_g1_i5|m.2178
lcl|c210724_g2_i1|m.2253
lcl|c244023_g1_i1|m.31634
lcl|c212784_g2_i1|m.2837
lcl|c212839_g1_i3|m.2877
lcl|c213314_g8_i4|m.3021
lcl|c213496_g2_i3|m.3109
lcl|c213677_g1_i4|m.3168
lcl|c213837_g2_i3|m.3220
lcl|c213886_g7_i2|m.3271
lcl|c214228_g4_i6|m.3409
lcl|c214242_g1_i2|m.3413
lcl|c214356_g7_i5|m.3463
lcl|c214397_g6_i4|m.3476
lcl|c214499_g2_i2|m.3512
lcl|c214530_g4_i1|m.3518
lcl|c214830_g3_i4|m.3696
lcl|c214915_g6_i2|m.3733
lcl|c215450_g1_i1|m.4033
lcl|c215492_g2_i9|m.4058
lcl|c215662_g1_i2|m.4137
lcl|c213534_g3_i4|m.3118
lcl|c215763_g2_i3|m.4184
lcl|c215894_g1_i3|m.4266
lcl|c215953_g5_i6|m.4317
lcl|c215963_g8_i2|m.4326
lcl|c216038_g5_i1|m.4365
lcl|c216057_g3_i1|m.4371
lcl|c216057_g3_i4|m.4374
lcl|c216124_g1_i3|m.4406
lcl|c216129_g1_i2|m.4409
lcl|c213742_g1_i10|m.3190
lcl|c216163_g1_i3|m.4416
lcl|c216317_g4_i4|m.4533
lcl|c216367_g2_i7|m.4555
lcl|c216377_g1_i3|m.4559
lcl|c216500_g6_i5|m.4616
lcl|c216645_g1_i1|m.4691
lcl|c217013_g4_i3|m.4901
lcl|c217098_g2_i2|m.4966
lcl|c213743_g5_i1|m.3191
lcl|c217182_g4_i3|m.5021
lcl|c217182_g4_i2|m.5020
lcl|c217341_g1_i2|m.5116
lcl|c217427_g4_i1|m.5185
lcl|c217466_g1_i3|m.5215
lcl|c230117_g1_i3|m.14970
lcl|c217585_g1_i2|m.5268
lcl|c217591_g3_i2|m.5272
lcl|c217816_g7_i5|m.5372
lcl|c217854_g5_i6|m.5415
lcl|c217988_g6_i3|m.5463
lcl|c218196_g3_i9|m.5616
lcl|c218214_g1_i2|m.5634
lcl|c218647_g3_i1|m.5884
lcl|c218730_g2_i11|m.5922
lcl|c213850_g3_i2|m.3229
lcl|c218881_g3_i2|m.6022
lcl|c219237_g2_i4|m.6297
lcl|c219327_g1_i2|m.6330
lcl|c219495_g3_i10|m.6406
lcl|c219546_g2_i1|m.6439
lcl|c219556_g4_i5|m.6447
lcl|c213850_g4_i1|m.3231
lcl|c219662_g1_i2|m.6507
lcl|c219710_g2_i1|m.6538
lcl|c214653_g2_i1|m.3571
lcl|c219733_g1_i5|m.6547
lcl|c219829_g2_i1|m.6600
lcl|c219883_g1_i2|m.6624
lcl|c220360_g1_i5|m.6901
lcl|c220640_g5_i2|m.7065
lcl|c220808_g2_i6|m.7171
lcl|c220945_g4_i2|m.7256
lcl|c220947_g2_i1|m.7263
lcl|c220977_g2_i3|m.7288
lcl|c221039_g1_i2|m.7339
lcl|c213946_g11_i4|m.3301
lcl|c221077_g4_i2|m.7375
lcl|c221101_g1_i4|m.7399
lcl|c221225_g1_i6|m.7493
lcl|c221281_g1_i1|m.7531
lcl|c221356_g3_i2|m.7588
lcl|c221374_g4_i3|m.7595
lcl|c221440_g2_i5|m.7632
lcl|c221441_g1_i5|m.7633
lcl|c221482_g1_i3|m.7664
lcl|c214028_g2_i1|m.3329
lcl|c221497_g1_i2|m.7677
lcl|c221524_g4_i2|m.7708
lcl|c221524_g4_i1|m.7707
lcl|c221583_g3_i2|m.7741
lcl|c221608_g1_i1|m.7755
lcl|c221672_g4_i6|m.7784
lcl|c221676_g4_i4|m.7786
lcl|c227927_g4_i1|m.12894
lcl|c228653_g2_i5|m.13498
lcl|c217326_g3_i1|m.5105
lcl|c221883_g2_i12|m.7953
lcl|c214032_g1_i4|m.3331
lcl|c222208_g5_i7|m.8170
lcl|c222306_g9_i1|m.8237
lcl|c222339_g3_i2|m.8253
lcl|c222399_g1_i2|m.8304
lcl|c244474_g2_i1|m.32252
lcl|c224694_g1_i1|m.10068
lcl|c222419_g1_i6|m.8316
lcl|c222437_g1_i2|m.8353
lcl|c222451_g1_i1|m.8369
lcl|c214108_g4_i4|m.3369
lcl|c222459_g5_i1|m.8379
lcl|c222639_g5_i2|m.8480
lcl|c222899_g2_i4|m.8691
lcl|c222946_g2_i3|m.8728
lcl|c220806_g2_i3|m.7164
lcl|c214189_g1_i1|m.3388
lcl|c222950_g5_i5|m.8734
lcl|c222960_g2_i1|m.8750
lcl|c214118_g1_i2|m.3372
lcl|c223053_g2_i3|m.8836
lcl|c223078_g3_i2|m.8859
lcl|c223098_g6_i3|m.8878
lcl|c223162_g2_i6|m.8914
lcl|c223274_g3_i3|m.8991
lcl|c223345_g3_i1|m.9044
lcl|c223355_g1_i3|m.9051
lcl|c214211_g3_i3|m.3396
lcl|c223365_g2_i2|m.9063
lcl|c223448_g1_i3|m.9130
lcl|c223454_g1_i3|m.9139
lcl|c215384_g1_i4|m.3995
lcl|c223499_g2_i8|m.9175
lcl|c223499_g2_i6|m.9173
lcl|c223556_g1_i6|m.9203
lcl|c223629_g2_i1|m.9258
lcl|c223629_g2_i2|m.9260
lcl|c223654_g2_i3|m.9281
lcl|c223673_g2_i1|m.9297
lcl|c223761_g4_i7|m.9360
lcl|c223808_g2_i1|m.9405
lcl|c223865_g4_i2|m.9445
lcl|c223901_g5_i2|m.9467
lcl|c223941_g1_i2|m.9485
lcl|c221840_g3_i2|m.7908
lcl|c221840_g3_i5|m.7911
lcl|c224714_g2_i1|m.10079
lcl|c224029_g4_i1|m.9563
lcl|c224057_g7_i5|m.9575
lcl|c224226_g3_i4|m.9666
lcl|c224260_g2_i3|m.9686
lcl|c224263_g3_i3|m.9691
lcl|c224312_g2_i3|m.9718
lcl|c224498_g4_i2|m.9859
lcl|c224541_g6_i2|m.9899
lcl|c224713_g2_i1|m.10075
lcl|c224811_g1_i3|m.10150
lcl|c224835_g5_i2|m.10167
lcl|c224848_g3_i5|m.10172
lcl|c224890_g1_i1|m.10217
lcl|c224995_g6_i2|m.10289
lcl|c187253_g2_i1|m.744
lcl|c214539_g3_i1|m.3522
lcl|c225115_g3_i4|m.10375
lcl|c225132_g1_i3|m.10387
lcl|c225156_g8_i5|m.10409
lcl|c225214_g2_i5|m.10448
lcl|c225236_g1_i2|m.10460
lcl|c225245_g1_i2|m.10472
lcl|c225328_g5_i5|m.10528
lcl|c225457_g2_i2|m.10643
lcl|c214559_g9_i1|m.3528
lcl|c225471_g2_i2|m.10654
lcl|c225753_g2_i5|m.10911
lcl|c223432_g3_i1|m.9111
lcl|c225756_g1_i2|m.10914
lcl|c225775_g7_i7|m.10937
lcl|c225789_g4_i1|m.10946
lcl|c225859_g2_i6|m.10997
lcl|c226009_g3_i5|m.11131
lcl|c214573_g3_i1|m.3534
lcl|c226079_g3_i1|m.11186
lcl|c226079_g3_i2|m.11188
lcl|c226115_g1_i8|m.11228
lcl|c226146_g2_i7|m.11244
lcl|c226156_g7_i2|m.11251
lcl|c226613_g4_i3|m.11623
lcl|c226631_g6_i18|m.11657
lcl|c214602_g8_i1|m.3549
lcl|c226715_g5_i2|m.11728
lcl|c226739_g4_i2|m.11743
lcl|c226769_g3_i1|m.11767
lcl|c210478_g1_i4|m.2192
lcl|c226933_g1_i6|m.11949
lcl|c226971_g4_i9|m.11985
lcl|c226978_g9_i3|m.11996
lcl|c227069_g2_i12|m.12102
lcl|c227080_g2_i3|m.12113
lcl|c227108_g1_i3|m.12161
lcl|c237065_g1_i1|m.22858
lcl|c214652_g1_i3|m.3567
lcl|c227129_g2_i15|m.12185
lcl|c227188_g1_i3|m.12224
lcl|c227206_g2_i7|m.12247
lcl|c227332_g2_i2|m.12341
lcl|c227562_g6_i1|m.12582
lcl|c227564_g2_i6|m.12586
lcl|c214656_g8_i1|m.3574
lcl|c227758_g2_i4|m.12736
lcl|c227780_g2_i3|m.12767
lcl|c227856_g7_i5|m.12838
lcl|c227887_g3_i2|m.12871
lcl|c227910_g4_i10|m.12878
lcl|c227928_g1_i2|m.12896
lcl|c227928_g3_i7|m.12901
lcl|c227939_g2_i2|m.12910
lcl|c227958_g2_i1|m.12924
lcl|c227993_g1_i6|m.12952
lcl|c228113_g1_i1|m.13052
lcl|c228221_g2_i9|m.13137
lcl|c228244_g5_i1|m.13157
lcl|c228245_g4_i3|m.13160
lcl|c228300_g4_i1|m.13216
lcl|c228309_g1_i6|m.13221
lcl|c214691_g1_i1|m.3614
lcl|c228453_g2_i2|m.13342
lcl|c228525_g4_i3|m.13399
lcl|c228543_g5_i2|m.13413
lcl|c228577_g3_i1|m.13439
lcl|c228666_g1_i2|m.13507
lcl|c228678_g2_i11|m.13512
lcl|c228700_g2_i5|m.13572
lcl|c228700_g2_i1|m.13568
lcl|c214720_g1_i1|m.3639
lcl|c228728_g1_i4|m.13597
lcl|c228746_g3_i3|m.13615
lcl|c228746_g2_i5|m.13610
lcl|c228772_g4_i5|m.13636
lcl|c228830_g2_i1|m.13692
lcl|c228994_g6_i1|m.13852
lcl|c229012_g1_i8|m.13875
lcl|c229056_g1_i4|m.13924
lcl|c229060_g1_i1|m.13927
lcl|c214720_g2_i1|m.3640
lcl|c229073_g2_i1|m.13946
lcl|c229110_g2_i1|m.13970
lcl|c229132_g1_i2|m.13984
lcl|c229134_g1_i1|m.13988
lcl|c229184_g1_i1|m.14022
lcl|c229340_g1_i1|m.14173
lcl|c229503_g1_i3|m.14339
lcl|c229507_g2_i4|m.14343
lcl|c229561_g1_i12|m.14408
lcl|c229615_g3_i4|m.14451
lcl|c229670_g1_i2|m.14513
lcl|c229742_g2_i1|m.14577
lcl|c229751_g1_i2|m.14592
lcl|c229768_g1_i6|m.14605
lcl|c214832_g3_i2|m.3697
lcl|c229886_g1_i6|m.14730
lcl|c230011_g2_i5|m.14861
lcl|c230039_g1_i2|m.14881
lcl|c230054_g1_i7|m.14897
lcl|c230102_g4_i1|m.14957
lcl|c214891_g1_i1|m.3715
lcl|c230124_g3_i6|m.14973
lcl|c230150_g4_i2|m.14989
lcl|c230186_g5_i1|m.15032
lcl|c230276_g3_i1|m.15112
lcl|c230360_g10_i5|m.15205
lcl|c214925_g1_i1|m.3737
lcl|c230434_g3_i8|m.15304
lcl|c230438_g3_i4|m.15312
lcl|c230481_g5_i1|m.15356
lcl|c230636_g2_i1|m.15503
lcl|c230792_g1_i1|m.15630
lcl|c230823_g3_i1|m.15672
lcl|c230829_g2_i5|m.15683
lcl|c230880_g3_i5|m.15737
lcl|c231030_g9_i2|m.15907
lcl|c231043_g3_i4|m.15925
lcl|c231142_g1_i4|m.15993
lcl|c215957_g2_i7|m.4321
lcl|c231190_g4_i3|m.16030
lcl|c231190_g4_i6|m.16031
lcl|c231257_g1_i5|m.16082
lcl|c231285_g1_i2|m.16098
lcl|c231339_g4_i2|m.16143
lcl|c214971_g6_i7|m.3760
lcl|c231352_g2_i1|m.16156
lcl|c231430_g2_i6|m.16242
lcl|c231430_g2_i12|m.16236
lcl|c231440_g4_i2|m.16256
lcl|c231469_g3_i4|m.16290
lcl|c231477_g1_i1|m.16301
lcl|c231506_g1_i1|m.16344
lcl|c231559_g1_i5|m.16408
lcl|c231575_g5_i2|m.16426
lcl|c231634_g1_i2|m.16472
lcl|c231859_g5_i5|m.16713
lcl|c238311_g1_i2|m.24377
lcl|c214714_g4_i1|m.3630
lcl|c221076_g3_i4|m.7373
lcl|c243020_g2_i5|m.30523
lcl|c225899_g3_i1|m.11041
lcl|c221146_g4_i1|m.7411
lcl|c231864_g5_i1|m.16720
lcl|c231896_g2_i12|m.16763
lcl|c231963_g1_i7|m.16837
lcl|c231982_g2_i3|m.16868
lcl|c232046_g3_i8|m.16952
lcl|c232109_g7_i6|m.17002
lcl|c232116_g4_i2|m.17015
lcl|c232149_g3_i2|m.17053
lcl|c232249_g2_i1|m.17180
lcl|c232274_g1_i4|m.17210
lcl|c232369_g2_i7|m.17306
lcl|c232520_g2_i5|m.17456
lcl|c232532_g2_i4|m.17479
lcl|c232628_g4_i3|m.17621
lcl|c215093_g1_i2|m.3818
lcl|c232843_g1_i4|m.17830
lcl|c226607_g5_i2|m.11621
lcl|c232931_g1_i10|m.17922
lcl|c233011_g1_i2|m.18023
lcl|c233012_g3_i3|m.18031
lcl|c233024_g1_i6|m.18051
lcl|c233026_g1_i2|m.18055
lcl|c233030_g2_i3|m.18059
lcl|c233048_g1_i8|m.18077
lcl|c233068_g3_i4|m.18107
lcl|c233068_g3_i2|m.18104
lcl|c211676_g2_i1|m.2488
lcl|c211676_g2_i2|m.2489
lcl|c233088_g8_i4|m.18128
lcl|c233103_g2_i1|m.18143
lcl|c233130_g1_i1|m.18171
lcl|c233215_g1_i5|m.18281
lcl|c233306_g1_i2|m.18390
lcl|c233334_g2_i12|m.18425
lcl|c233334_g2_i17|m.18426
lcl|c188047_g2_i2|m.760
lcl|c215279_g2_i6|m.3910
lcl|c233377_g4_i3|m.18471
lcl|c233384_g5_i1|m.18475
lcl|c233495_g1_i1|m.18614
lcl|c233557_g1_i1|m.18714
lcl|c233661_g2_i3|m.18841
lcl|c233767_g1_i3|m.18989
lcl|c233774_g10_i4|m.19004
lcl|c233774_g10_i1|m.19002
lcl|c233784_g1_i2|m.19012
lcl|c215299_g2_i2|m.3927
lcl|c233905_g2_i1|m.19151
lcl|c233922_g1_i2|m.19174
lcl|c228945_g3_i2|m.13809
lcl|c233948_g1_i2|m.19238
lcl|c233953_g2_i7|m.19245
lcl|c234077_g1_i1|m.19404
lcl|c234080_g1_i1|m.19410
lcl|c215313_g3_i2|m.3930
lcl|c234108_g1_i5|m.19456
lcl|c234120_g6_i1|m.19489
lcl|c234177_g2_i1|m.19581
lcl|c234222_g6_i3|m.19630
lcl|c234421_g4_i7|m.19822
lcl|c234442_g1_i3|m.19849
lcl|c215316_g1_i1|m.3942
lcl|c234533_g4_i3|m.19947
lcl|c234544_g3_i6|m.19962
lcl|c234579_g2_i6|m.20008
lcl|c234620_g1_i3|m.20041
lcl|c234626_g4_i3|m.20042
lcl|c229538_g7_i4|m.14373
lcl|c234643_g1_i12|m.20068
lcl|c234643_g1_i1|m.20065
lcl|c234643_g1_i2|m.20073
lcl|c234643_g1_i7|m.20081
lcl|c234643_g1_i6|m.20078
lcl|c234687_g2_i2|m.20139
lcl|c234783_g2_i5|m.20249
lcl|c234851_g1_i2|m.20336
lcl|c234869_g3_i5|m.20367
lcl|c234883_g2_i2|m.20378
lcl|c234883_g2_i9|m.20380
lcl|c234898_g1_i3|m.20394
lcl|c234955_g3_i8|m.20446
lcl|c235089_g1_i3|m.20552
lcl|c229776_g6_i2|m.14612
lcl|c235253_g1_i1|m.20757
lcl|c235276_g3_i3|m.20780
lcl|c235384_g3_i4|m.20872
lcl|c235446_g2_i1|m.20934
lcl|c235506_g6_i4|m.20981
lcl|c235529_g1_i1|m.21016
lcl|c235530_g1_i2|m.21019
lcl|c235548_g1_i1|m.21054
lcl|c235682_g1_i2|m.21209
lcl|c215430_g1_i6|m.4026
lcl|c235735_g2_i4|m.21279
lcl|c235859_g3_i3|m.21393
lcl|c235877_g4_i2|m.21429
lcl|c236087_g2_i1|m.21666
lcl|c236114_g1_i1|m.21718
lcl|c236174_g2_i1|m.21787
lcl|c236195_g2_i4|m.21823
lcl|c236195_g4_i1|m.21828
lcl|c236195_g2_i1|m.21821
lcl|c236210_g3_i1|m.21846
lcl|c236213_g2_i1|m.21849
lcl|c236234_g4_i10|m.21877
lcl|c236239_g1_i2|m.21882
lcl|c236250_g3_i7|m.21896
lcl|c236256_g2_i1|m.21902
lcl|c236356_g1_i1|m.22029
lcl|c236360_g3_i2|m.22033
lcl|c236444_g1_i2|m.22121
lcl|c215455_g1_i1|m.4036
lcl|c236445_g2_i1|m.22123
lcl|c236445_g2_i3|m.22125
lcl|c236486_g1_i1|m.22162
lcl|c236516_g4_i3|m.22202
lcl|c236683_g3_i1|m.22390
lcl|c236793_g3_i9|m.22532
lcl|c236859_g1_i3|m.22625
lcl|c236867_g1_i1|m.22637
lcl|c236892_g3_i6|m.22670
lcl|c215465_g1_i1|m.4044
lcl|c236909_g3_i2|m.22685
lcl|c235901_g3_i2|m.21452
lcl|c184118_g1_i1|m.691
lcl|c237004_g1_i4|m.22774
lcl|c237237_g1_i5|m.23062
lcl|c237311_g4_i1|m.23148
lcl|c237328_g3_i1|m.23165
lcl|c237535_g3_i3|m.23359
lcl|c215551_g6_i1|m.4083
lcl|c237550_g1_i1|m.23390
lcl|c237576_g2_i7|m.23440
lcl|c237578_g2_i2|m.23441
lcl|c237593_g3_i1|m.23463
lcl|c237593_g3_i5|m.23465
lcl|c237609_g2_i1|m.23487
lcl|c237638_g1_i15|m.23528
lcl|c215606_g3_i1|m.4107
lcl|c237711_g3_i12|m.23641
lcl|c237732_g2_i2|m.23675
lcl|c237732_g2_i12|m.23671
lcl|c237805_g1_i7|m.23781
lcl|c237814_g2_i3|m.23786
lcl|c237814_g2_i4|m.23787
lcl|c237851_g2_i1|m.23817
lcl|c237883_g5_i1|m.23858
lcl|c237938_g3_i2|m.23906
lcl|c237955_g4_i3|m.23932
lcl|c237982_g4_i2|m.23956
lcl|c215616_g6_i2|m.4120
lcl|c237992_g1_i1|m.23966
lcl|c238005_g1_i2|m.23984
lcl|c238005_g1_i4|m.23993
lcl|c238054_g2_i6|m.24053
lcl|c238111_g1_i1|m.24102
lcl|c238116_g1_i4|m.24117
lcl|c238132_g3_i11|m.24132
lcl|c238132_g3_i10|m.24131
lcl|c238150_g1_i3|m.24168
lcl|c238164_g1_i1|m.24182
lcl|c238296_g3_i2|m.24349
lcl|c238364_g3_i7|m.24424
lcl|c238381_g2_i2|m.24448
lcl|c238399_g3_i5|m.24485
lcl|c238399_g3_i2|m.24483
lcl|c238399_g3_i3|m.24484
lcl|c238429_g5_i1|m.24515
lcl|c238490_g5_i3|m.24584
lcl|c238491_g1_i8|m.24586
lcl|c238537_g2_i6|m.24628
lcl|c229550_g1_i3|m.14393
lcl|c238647_g1_i1|m.24759
lcl|c238662_g3_i6|m.24778
lcl|c238676_g4_i3|m.24804
lcl|c238681_g1_i11|m.24819
lcl|c238754_g1_i3|m.24885
lcl|c238850_g2_i5|m.25002
lcl|c238912_g1_i4|m.25063
lcl|c238912_g1_i8|m.25068
lcl|c238919_g4_i6|m.25079
lcl|c238994_g2_i3|m.25167
lcl|c239125_g3_i2|m.25324
lcl|c239136_g4_i3|m.25338
lcl|c239240_g3_i4|m.25490
lcl|c239261_g1_i11|m.25522
lcl|c239261_g1_i12|m.25525
lcl|c215676_g2_i1|m.4150
lcl|c239281_g1_i1|m.25557
lcl|c239419_g1_i1|m.25763
lcl|c239424_g1_i7|m.25774
lcl|c239517_g6_i1|m.25917
lcl|c239543_g6_i2|m.25954
lcl|c239546_g1_i2|m.25957
lcl|c239571_g1_i3|m.25989
lcl|c239571_g1_i8|m.25993
lcl|c239584_g1_i11|m.26009
lcl|c239643_g6_i2|m.26073
lcl|c239662_g2_i17|m.26115
lcl|c239700_g3_i2|m.26207
lcl|c239722_g4_i5|m.26254
lcl|c239814_g2_i1|m.26347
lcl|c239814_g2_i3|m.26348
lcl|c239816_g8_i1|m.26351
lcl|c239816_g8_i3|m.26354
lcl|c216784_g1_i1|m.4762
lcl|c239860_g1_i2|m.26443
lcl|c239860_g1_i1|m.26440
lcl|c239860_g1_i4|m.26447
lcl|c218302_g5_i1|m.5709
lcl|c215778_g6_i2|m.4198
lcl|c239956_g2_i4|m.26561
lcl|c240071_g1_i3|m.26729
lcl|c240071_g1_i5|m.26730
lcl|c240077_g1_i1|m.26736
lcl|c240077_g1_i6|m.26741
lcl|c240077_g1_i4|m.26740
lcl|c240077_g1_i9|m.26743
lcl|c240128_g3_i1|m.26827
lcl|c240158_g2_i1|m.26858
lcl|c240245_g2_i2|m.26954
lcl|c240253_g1_i1|m.26963
lcl|c244342_g1_i1|m.32068
lcl|c240259_g4_i3|m.26973
lcl|c240259_g4_i5|m.26974
lcl|c240264_g4_i5|m.26985
lcl|c240297_g1_i2|m.27045
lcl|c240333_g1_i3|m.27087
lcl|c240370_g1_i1|m.27121
lcl|c240483_g2_i3|m.27310
lcl|c240483_g1_i8|m.27301
lcl|c240483_g1_i4|m.27290
lcl|c240483_g1_i3|m.27286
lcl|c240523_g1_i10|m.27367
lcl|c240612_g3_i13|m.27477
lcl|c240621_g3_i2|m.27488
lcl|c240699_g3_i15|m.27615
lcl|c240711_g1_i2|m.27634
lcl|c192621_g3_i1|m.866
lcl|c215838_g2_i1|m.4235
lcl|c240720_g1_i3|m.27662
lcl|c240732_g2_i2|m.27675
lcl|c240787_g1_i1|m.27744
lcl|c240793_g1_i1|m.27747
lcl|c240852_g1_i3|m.27810
lcl|c232899_g1_i2|m.17887
lcl|c240887_g1_i1|m.27877
lcl|c240901_g2_i12|m.27918
lcl|c215924_g3_i1|m.4285
lcl|c241055_g1_i5|m.28132
lcl|c241174_g2_i10|m.28286
lcl|c241242_g1_i1|m.28345
lcl|c241252_g2_i5|m.28366
lcl|c241254_g2_i1|m.28367
lcl|c241378_g5_i4|m.28499
lcl|c241763_g6_i2|m.28918
lcl|c215928_g3_i1|m.4293
lcl|c241792_g2_i3|m.28939
lcl|c241817_g1_i2|m.28964
lcl|c241817_g1_i5|m.28968
lcl|c241874_g1_i11|m.29053
lcl|c241874_g1_i1|m.29043
lcl|c241874_g1_i7|m.29076
lcl|c241874_g1_i1|m.29042
lcl|c241874_g1_i11|m.29054
lcl|c241874_g1_i1|m.29044
lcl|c241916_g1_i7|m.29148
lcl|c242047_g5_i1|m.29305
lcl|c242362_g2_i1|m.29701
lcl|c242487_g1_i2|m.29847
lcl|c215957_g2_i1|m.4319
lcl|c242633_g1_i1|m.30058
lcl|c242709_g1_i2|m.30167
lcl|c242868_g4_i4|m.30303
lcl|c242872_g1_i1|m.30313
lcl|c242920_g6_i2|m.30392
lcl|c243004_g1_i3|m.30514
lcl|c243059_g4_i3|m.30568
lcl|c216188_g2_i2|m.4423
lcl|c243222_g3_i1|m.30722
lcl|c243269_g3_i1|m.30762
lcl|c243326_g1_i1|m.30823
lcl|c243357_g2_i4|m.30881
lcl|c243493_g3_i2|m.31028
lcl|c243591_g3_i1|m.31105
lcl|c243632_g1_i1|m.31156
lcl|c216194_g2_i1|m.4425
lcl|c243652_g1_i2|m.31190
lcl|c243813_g3_i2|m.31355
lcl|c244151_g1_i2|m.31813
lcl|c244343_g3_i1|m.32069
lcl|c318732_g1_i1|m.32501
lcl|c270076_g1_i1|m.32416
lcl|c11224_g1_i1|m.56
lcl|c216201_g2_i1|m.4428
lcl|c214535_g1_i1|m.3520
lcl|c215388_g4_i3|m.4003
lcl|c216289_g7_i1|m.4487
lcl|c216467_g8_i2|m.4597
lcl|c217363_g1_i6|m.5152
lcl|c234467_g2_i1|m.19858
lcl|c234999_g3_i3|m.20494
lcl|c236924_g5_i3|m.22694
lcl|c194625_g1_i1|m.911
lcl|c239334_g2_i2|m.25606
lcl|c240624_g2_i1|m.27495
lcl|c240911_g1_i2|m.27934
lcl|c216448_g1_i1|m.4592
lcl|c216467_g10_i1|m.4595
lcl|c223254_g1_i1|m.8977
lcl|c216527_g1_i2|m.4625
lcl|c216539_g3_i3|m.4633
lcl|c216567_g2_i2|m.4643
lcl|c218000_g1_i5|m.5473
lcl|c235769_g9_i1|m.21325
lcl|c216621_g3_i1|m.4676
lcl|c221711_g1_i1|m.7807
lcl|c229093_g1_i2|m.13957
lcl|c216650_g2_i1|m.4697
lcl|c216655_g1_i1|m.4705
lcl|c231825_g1_i2|m.16652
lcl|c234391_g1_i4|m.19790
lcl|c216702_g5_i1|m.4730
lcl|c243406_g1_i1|m.30946
lcl|c243675_g4_i3|m.31228
lcl|c240246_g6_i1|m.26956
lcl|c216834_g4_i2|m.4800
lcl|c227073_g3_i1|m.12111
lcl|c216848_g3_i4|m.4809
lcl|c223357_g4_i3|m.9060
lcl|c225637_g3_i2|m.10796
lcl|c234030_g1_i1|m.19351
lcl|c216872_g3_i2|m.4822
lcl|c237455_g11_i1|m.23288
lcl|c240578_g4_i1|m.27439
lcl|c198620_g1_i2|m.1049
lcl|c216942_g4_i3|m.4860
lcl|c238797_g3_i10|m.24911
lcl|c232597_g5_i15|m.17582
lcl|c242869_g2_i4|m.30308
lcl|c210995_g1_i1|m.2321
lcl|c222542_g3_i2|m.8415
lcl|c225557_g1_i1|m.10731
lcl|c217005_g3_i1|m.4893
lcl|c217008_g4_i3|m.4896
lcl|c217792_g3_i1|m.5367
lcl|c217046_g2_i2|m.4921
lcl|c217146_g1_i1|m.4997
lcl|c217195_g5_i2|m.5022
lcl|c217198_g5_i5|m.5024
lcl|c217015_g1_i1|m.4906
lcl|c217199_g3_i2|m.5026
lcl|c242000_g5_i4|m.29233
lcl|c217447_g9_i5|m.5205
lcl|c244381_g2_i1|m.32105
lcl|c217534_g1_i2|m.5231
lcl|c217573_g1_i1|m.5252
lcl|c230044_g4_i2|m.14887
lcl|c243527_g1_i1|m.31049
lcl|c217654_g5_i4|m.5303
lcl|c242934_g1_i4|m.30427
lcl|c229303_g7_i1|m.14137
lcl|c236793_g3_i7|m.22527
lcl|c217724_g1_i1|m.5344
lcl|c217737_g4_i4|m.5348
lcl|c217776_g2_i5|m.5358
lcl|c217777_g4_i6|m.5361
lcl|c217808_g1_i5|m.5370
lcl|c217834_g1_i3|m.5399
lcl|c217887_g8_i2|m.5422
lcl|c181783_g1_i1|m.659
lcl|c217972_g1_i6|m.5456
lcl|c227952_g2_i1|m.12918
lcl|c204003_g1_i4|m.1363
lcl|c213837_g2_i4|m.3221
lcl|c218043_g2_i3|m.5510
lcl|c218119_g1_i3|m.5570
lcl|c218123_g3_i2|m.5572
lcl|c234172_g3_i1|m.19574
lcl|c218223_g3_i1|m.5642
lcl|c218374_g4_i1|m.5754
lcl|c218375_g1_i1|m.5756
lcl|c218445_g1_i1|m.5788
lcl|c218481_g4_i6|m.5811
lcl|c218495_g1_i2|m.5815
lcl|c218580_g2_i1|m.5839
lcl|c218696_g8_i2|m.5906
lcl|c218703_g1_i4|m.5907
lcl|c201155_g1_i1|m.1182
lcl|c218722_g1_i2|m.5914
lcl|c218748_g1_i1|m.5931
lcl|c218789_g1_i2|m.5965
lcl|c218814_g3_i7|m.5970
lcl|c218820_g4_i2|m.5974
lcl|c220164_g3_i1|m.6775
lcl|c218842_g3_i2|m.5986
lcl|c218842_g3_i2|m.5987
lcl|c218852_g5_i3|m.5993
lcl|c201157_g2_i3|m.1183
lcl|c218872_g2_i3|m.6012
lcl|c219090_g4_i2|m.6185
lcl|c230386_g2_i1|m.15223
lcl|c219163_g1_i3|m.6242
lcl|c219184_g1_i2|m.6256
lcl|c219187_g1_i1|m.6258
lcl|c219274_g1_i6|m.6313
lcl|c201413_g4_i1|m.1201
lcl|c219506_g5_i1|m.6423
lcl|c219564_g8_i2|m.6456
lcl|c219583_g2_i1|m.6468
lcl|c219601_g1_i1|m.6471
lcl|c219636_g2_i1|m.6494
lcl|c219636_g2_i3|m.6495
lcl|c219659_g7_i1|m.6504
lcl|c217780_g1_i2|m.5363
lcl|c201696_g3_i1|m.1219
lcl|c219704_g3_i2|m.6534
lcl|c219759_g3_i3|m.6556
lcl|c219828_g4_i5|m.6597
lcl|c219842_g1_i1|m.6611
lcl|c219870_g5_i1|m.6620
lcl|c220008_g2_i5|m.6705
lcl|c220050_g2_i1|m.6739
lcl|c220226_g2_i9|m.6827
lcl|c220236_g4_i1|m.6833
lcl|c220252_g1_i3|m.6839
lcl|c220300_g3_i1|m.6859
lcl|c220319_g5_i1|m.6862
lcl|c202641_g1_i1|m.1266
lcl|c220475_g1_i1|m.6962
lcl|c220485_g3_i1|m.6974
lcl|c220577_g5_i1|m.7011
lcl|c220622_g1_i1|m.7032
lcl|c220638_g5_i1|m.7054
lcl|c220695_g1_i1|m.7091
lcl|c220748_g5_i2|m.7116
lcl|c220863_g2_i3|m.7207
lcl|c220954_g1_i2|m.7267
lcl|c220963_g1_i1|m.7276
lcl|c221031_g2_i1|m.7336
lcl|c221039_g3_i2|m.7343
lcl|c203193_g1_i1|m.1308
lcl|c221077_g1_i1|m.7374
lcl|c221105_g4_i2|m.7402
lcl|c221114_g2_i1|m.7405
lcl|c221130_g3_i2|m.7408
lcl|c221194_g2_i1|m.7463
lcl|c221238_g1_i4|m.7502
lcl|c221281_g1_i1|m.7530
lcl|c221296_g1_i3|m.7550
lcl|c221427_g1_i4|m.7617
lcl|c221450_g9_i6|m.7639
lcl|c221464_g1_i3|m.7656
lcl|c221514_g6_i1|m.7698
lcl|c221586_g4_i2|m.7745
lcl|c221593_g3_i1|m.7753
lcl|c221619_g2_i1|m.7763
lcl|c221649_g6_i2|m.7773
lcl|c221662_g2_i4|m.7775
lcl|c221694_g2_i1|m.7797
lcl|c221736_g1_i11|m.7820
lcl|c221753_g3_i7|m.7844
lcl|c221849_g1_i2|m.7917
lcl|c204019_g1_i1|m.1366
lcl|c221855_g2_i3|m.7925
lcl|c221890_g1_i1|m.7971
lcl|c221925_g1_i3|m.7988
lcl|c221967_g2_i3|m.8016
lcl|c221968_g1_i1|m.8017
lcl|c221971_g3_i2|m.8022
lcl|c222028_g1_i5|m.8060
lcl|c222117_g4_i1|m.8104
lcl|c222123_g3_i1|m.8109
lcl|c204436_g1_i1|m.1392
lcl|c222132_g1_i1|m.8115
lcl|c222186_g2_i2|m.8151
lcl|c222196_g3_i1|m.8162
lcl|c222286_g2_i1|m.8232
lcl|c222301_g1_i3|m.8235
lcl|c222306_g8_i4|m.8236
lcl|c204885_g2_i1|m.1407
lcl|c222323_g2_i2|m.8244
lcl|c222323_g2_i2|m.8245
lcl|c222343_g4_i1|m.8262
lcl|c222353_g1_i1|m.8273
lcl|c222377_g6_i1|m.8283
lcl|c222386_g1_i1|m.8298
lcl|c205012_g1_i1|m.1420
lcl|c222436_g10_i1|m.8337
lcl|c222484_g2_i1|m.8393
lcl|c222526_g1_i2|m.8408
lcl|c222543_g3_i2|m.8418
lcl|c222548_g1_i3|m.8426
lcl|c222555_g2_i4|m.8428
lcl|c222581_g2_i12|m.8451
lcl|c222581_g2_i12|m.8452
lcl|c205368_g1_i5|m.1453
lcl|c222653_g7_i1|m.8496
lcl|c222691_g4_i1|m.8535
lcl|c222693_g1_i1|m.8538
lcl|c222727_g3_i2|m.8582
lcl|c222818_g1_i1|m.8630
lcl|c222837_g1_i1|m.8646
lcl|c222852_g4_i5|m.8661
lcl|c222909_g1_i1|m.8698
lcl|c222929_g2_i3|m.8717
lcl|c222937_g2_i3|m.8724
lcl|c222943_g1_i1|m.8725
lcl|c222943_g1_i2|m.8726
lcl|c222950_g5_i5|m.8735
lcl|c222957_g1_i2|m.8747
lcl|c223053_g2_i4|m.8839
lcl|c223071_g1_i1|m.8853
lcl|c223077_g2_i1|m.8858
lcl|c223139_g3_i2|m.8898
lcl|c223200_g1_i1|m.8933
lcl|c223205_g4_i1|m.8934
lcl|c223214_g1_i1|m.8951
lcl|c223247_g3_i6|m.8971
lcl|c223275_g1_i2|m.8992
lcl|c223351_g1_i1|m.9046
lcl|c205554_g2_i2|m.1468
lcl|c223425_g3_i3|m.9106
lcl|c223433_g6_i1|m.9115
lcl|c223577_g1_i1|m.9214
lcl|c223616_g1_i1|m.9252
lcl|c205697_g1_i1|m.1481
lcl|c223646_g1_i2|m.9273
lcl|c223673_g1_i3|m.9293
lcl|c223716_g4_i1|m.9328
lcl|c223775_g7_i2|m.9373
lcl|c223798_g3_i1|m.9397
lcl|c223870_g1_i6|m.9447
lcl|c205713_g1_i1|m.1484
lcl|c223975_g3_i3|m.9516
lcl|c223983_g2_i8|m.9524
lcl|c224042_g7_i2|m.9570
lcl|c224156_g3_i2|m.9641
lcl|c224201_g3_i8|m.9658
lcl|c224242_g3_i7|m.9677
lcl|c224289_g1_i1|m.9705
lcl|c224332_g10_i1|m.9746
lcl|c224365_g3_i1|m.9762
lcl|c224371_g5_i1|m.9765
lcl|c224405_g1_i1|m.9772
lcl|c224432_g1_i4|m.9787
lcl|c206417_g1_i2|m.1538
lcl|c224457_g1_i1|m.9820
lcl|c224488_g1_i1|m.9847
lcl|c224493_g2_i5|m.9854
lcl|c224556_g6_i1|m.9931
lcl|c224557_g2_i1|m.9933
lcl|c224589_g7_i1|m.9992
lcl|c224597_g3_i1|m.10003
lcl|c160676_g1_i1|m.404
lcl|c206531_g1_i1|m.1558
lcl|c224672_g1_i1|m.10055
lcl|c224672_g2_i1|m.10058
lcl|c224781_g7_i2|m.10124
lcl|c224812_g3_i3|m.10152
lcl|c224848_g2_i1|m.10169
lcl|c224866_g1_i2|m.10191
lcl|c224880_g4_i1|m.10208
lcl|c224918_g1_i1|m.10239
lcl|c206556_g1_i2|m.1565
lcl|c225015_g2_i1|m.10306
lcl|c225056_g1_i2|m.10336
lcl|c225144_g2_i3|m.10400
lcl|c225172_g3_i1|m.10424
lcl|c225266_g1_i7|m.10481
lcl|c225267_g2_i1|m.10483
lcl|c225281_g3_i2|m.10487
lcl|c225308_g1_i1|m.10501
lcl|c225308_g1_i4|m.10503
lcl|c225323_g2_i2|m.10522
lcl|c225334_g2_i2|m.10532
lcl|c225352_g1_i1|m.10544
lcl|c225394_g4_i2|m.10584
lcl|c225590_g2_i4|m.10752
lcl|c225618_g2_i6|m.10783
lcl|c207254_g1_i2|m.1628
lcl|c225632_g3_i1|m.10790
lcl|c225668_g5_i2|m.10809
lcl|c225713_g4_i1|m.10851
lcl|c225761_g6_i1|m.10925
lcl|c225782_g2_i1|m.10939
lcl|c207709_g1_i1|m.1673
lcl|c225829_g1_i1|m.10978
lcl|c225844_g2_i3|m.10984
lcl|c225852_g2_i3|m.10992
lcl|c225867_g3_i1|m.11000
lcl|c225875_g4_i2|m.11006
lcl|c225972_g1_i1|m.11091
lcl|c226005_g4_i1|m.11126
lcl|c226046_g1_i2|m.11150
lcl|c226084_g3_i2|m.11194
lcl|c226099_g2_i1|m.11211
lcl|c226138_g2_i1|m.11236
lcl|c226155_g2_i3|m.11249
lcl|c226212_g1_i3|m.11297
lcl|c226216_g1_i2|m.11298
lcl|c226230_g2_i2|m.11305
lcl|c226287_g1_i1|m.11356
lcl|c207960_g1_i1|m.1712
lcl|c226287_g1_i2|m.11357
lcl|c226332_g1_i2|m.11417
lcl|c226346_g1_i1|m.11426
lcl|c226389_g3_i1|m.11454
lcl|c226409_g2_i1|m.11459
lcl|c226414_g3_i1|m.11460
lcl|c226450_g3_i4|m.11486
lcl|c226505_g3_i2|m.11536
lcl|c226593_g2_i1|m.11607
lcl|c226627_g2_i3|m.11631
lcl|c207967_g2_i1|m.1713
lcl|c226723_g5_i2|m.11731
lcl|c226774_g3_i2|m.11777
lcl|c226786_g3_i2|m.11789
lcl|c226846_g2_i3|m.11856
lcl|c226917_g1_i2|m.11940
lcl|c226971_g4_i11|m.11980
lcl|c226990_g1_i2|m.12024
lcl|c226999_g3_i5|m.12032
lcl|c227063_g4_i1|m.12098
lcl|c227092_g1_i4|m.12141
lcl|c162537_g1_i2|m.418
lcl|c208317_g1_i1|m.1768
lcl|c227136_g2_i8|m.12192
lcl|c227188_g1_i1|m.12222
lcl|c227202_g1_i3|m.12234
lcl|c227267_g3_i2|m.12289
lcl|c227290_g1_i5|m.12317
lcl|c227293_g2_i4|m.12320
lcl|c208387_g1_i1|m.1778
lcl|c227297_g1_i3|m.12321
lcl|c227322_g4_i4|m.12336
lcl|c227361_g2_i9|m.12363
lcl|c227365_g1_i1|m.12366
lcl|c227414_g2_i1|m.12410
lcl|c227531_g4_i11|m.12520
lcl|c227533_g4_i2|m.12539
lcl|c227543_g1_i1|m.12562
lcl|c227543_g1_i4|m.12563
lcl|c227548_g3_i11|m.12568
lcl|c227571_g1_i1|m.12592
lcl|c227586_g2_i2|m.12601
lcl|c227657_g3_i1|m.12650
lcl|c227676_g2_i3|m.12666
lcl|c227683_g10_i1|m.12674
lcl|c227702_g4_i1|m.12691
lcl|c227720_g2_i2|m.12706
lcl|c227721_g2_i2|m.12707
lcl|c208691_g4_i1|m.1828
lcl|c227726_g1_i1|m.12708
lcl|c227735_g3_i4|m.12716
lcl|c227738_g1_i4|m.12717
lcl|c227772_g1_i1|m.12754
lcl|c227794_g1_i1|m.12770
lcl|c227847_g4_i2|m.12829
lcl|c227852_g1_i7|m.12835
lcl|c227928_g3_i2|m.12899
lcl|c208878_g1_i2|m.1846
lcl|c227969_g2_i1|m.12933
lcl|c227969_g5_i2|m.12934
lcl|c228038_g3_i1|m.12994
lcl|c228056_g1_i4|m.13006
lcl|c228121_g2_i2|m.13058
lcl|c228151_g1_i2|m.13084
lcl|c228205_g4_i2|m.13127
lcl|c228207_g1_i1|m.13128
lcl|c228317_g4_i1|m.13231
lcl|c228325_g7_i1|m.13245
lcl|c228330_g5_i1|m.13250
lcl|c228374_g2_i1|m.13291
lcl|c228380_g1_i2|m.13296
lcl|c228390_g1_i2|m.13299
lcl|c228456_g2_i1|m.13345
lcl|c228506_g1_i2|m.13379
lcl|c228524_g1_i1|m.13396
lcl|c228529_g1_i1|m.13404
lcl|c228583_g3_i2|m.13440
lcl|c228583_g6_i1|m.13441
lcl|c228611_g1_i2|m.13461
lcl|c209191_g2_i1|m.1916
lcl|c228611_g7_i1|m.13463
lcl|c228623_g6_i3|m.13470
lcl|c228665_g3_i2|m.13504
lcl|c228709_g4_i2|m.13577
lcl|c228742_g3_i1|m.13609
lcl|c228773_g1_i1|m.13638
lcl|c228789_g1_i1|m.13647
lcl|c228825_g1_i1|m.13684
lcl|c228838_g1_i2|m.13701
lcl|c228847_g1_i2|m.13712
lcl|c228864_g3_i2|m.13732
lcl|c228868_g10_i1|m.13735
lcl|c228869_g1_i2|m.13736
lcl|c228904_g1_i5|m.13760
lcl|c228940_g3_i1|m.13807
lcl|c209298_g1_i1|m.1944
lcl|c228955_g3_i2|m.13813
lcl|c228972_g3_i3|m.13832
lcl|c228984_g1_i2|m.13846
lcl|c229025_g3_i1|m.13888
lcl|c229032_g2_i1|m.13894
lcl|c229032_g2_i3|m.13895
lcl|c229032_g2_i5|m.13896
lcl|c229041_g1_i1|m.13901
lcl|c163027_g1_i3|m.422
lcl|c229055_g1_i1|m.13922
lcl|c229109_g1_i2|m.13969
lcl|c229207_g3_i3|m.14046
lcl|c229261_g2_i4|m.14109
lcl|c229298_g2_i1|m.14136
lcl|c229310_g3_i5|m.14142
lcl|c229310_g3_i5|m.14143
lcl|c209385_g1_i1|m.1957
lcl|c229351_g6_i1|m.14197
lcl|c229353_g1_i2|m.14200
lcl|c229422_g1_i2|m.14250
lcl|c229422_g1_i9|m.14251
lcl|c229426_g2_i4|m.14256
lcl|c229445_g3_i3|m.14271
lcl|c229460_g5_i1|m.14276
lcl|c229461_g3_i2|m.14279
lcl|c229482_g2_i3|m.14286
lcl|c229532_g3_i4|m.14360
lcl|c229534_g2_i1|m.14362
lcl|c229541_g1_i10|m.14378
lcl|c229541_g1_i10|m.14379
lcl|c229550_g1_i3|m.14392
lcl|c229579_g3_i1|m.14426
lcl|c229592_g3_i11|m.14442
lcl|c229676_g1_i1|m.14524
lcl|c229705_g1_i1|m.14556
lcl|c229735_g7_i1|m.14573
lcl|c229781_g4_i1|m.14624
lcl|c229808_g3_i3|m.14640
lcl|c209530_g1_i1|m.1990
lcl|c229853_g1_i1|m.14683
lcl|c229881_g6_i6|m.14719
lcl|c229904_g1_i2|m.14752
lcl|c229913_g3_i1|m.14763
lcl|c229917_g4_i4|m.14770
lcl|c229939_g1_i1|m.14795
lcl|c230000_g8_i2|m.14843
lcl|c209565_g1_i2|m.1999
lcl|c230032_g6_i1|m.14874
lcl|c230034_g1_i1|m.14877
lcl|c230065_g1_i2|m.14908
lcl|c230110_g2_i2|m.14961
lcl|c230136_g1_i1|m.14983
lcl|c230163_g1_i1|m.15005
lcl|c230178_g1_i2|m.15028
lcl|c209565_g1_i2|m.2000
lcl|c230184_g2_i3|m.15031
lcl|c230192_g3_i5|m.15041
lcl|c230197_g3_i5|m.15044
lcl|c230270_g1_i2|m.15107
lcl|c230296_g1_i1|m.15135
lcl|c230355_g4_i3|m.15198
lcl|c230411_g4_i1|m.15261
lcl|c230414_g1_i1|m.15275
lcl|c230632_g1_i6|m.15498
lcl|c230758_g1_i1|m.15596
lcl|c230771_g2_i1|m.15607
lcl|c209757_g1_i1|m.2044
lcl|c230960_g1_i5|m.15839
lcl|c231052_g3_i3|m.15929
lcl|c231068_g6_i2|m.15939
lcl|c231085_g3_i1|m.15955
lcl|c231252_g2_i1|m.16075
lcl|c209846_g4_i1|m.2055
lcl|c231281_g6_i3|m.16097
lcl|c231364_g6_i1|m.16162
lcl|c231378_g1_i2|m.16165
lcl|c231445_g1_i1|m.16259
lcl|c231460_g1_i4|m.16283
lcl|c231462_g1_i10|m.16284
lcl|c231577_g2_i2|m.16429
lcl|c231601_g3_i1|m.16437
lcl|c164490_g1_i1|m.440
lcl|c210226_g1_i1|m.2139
lcl|c231621_g3_i3|m.16453
lcl|c231694_g3_i2|m.16524
lcl|c231698_g2_i1|m.16532
lcl|c231732_g6_i1|m.16569
lcl|c231737_g1_i3|m.16576
lcl|c231739_g1_i3|m.16580
lcl|c231789_g3_i2|m.16623
lcl|c231808_g9_i1|m.16644
lcl|c231811_g3_i1|m.16645
lcl|c210228_g3_i1|m.2141
lcl|c231821_g3_i1|m.16651
lcl|c231881_g1_i2|m.16748
lcl|c231891_g1_i1|m.16759
lcl|c231904_g1_i7|m.16777
lcl|c231929_g5_i4|m.16789
lcl|c231931_g2_i1|m.16792
lcl|c231967_g1_i2|m.16842
lcl|c210228_g8_i1|m.2145
lcl|c231997_g2_i3|m.16900
lcl|c232008_g1_i2|m.16909
lcl|c232105_g3_i1|m.16994
lcl|c232108_g1_i1|m.16997
lcl|c232108_g1_i2|m.16999
lcl|c210230_g1_i1|m.2146
lcl|c232133_g1_i5|m.17039
lcl|c232137_g2_i1|m.17041
lcl|c232215_g4_i2|m.17149
lcl|c232232_g4_i1|m.17169
lcl|c232241_g6_i1|m.17171
lcl|c232241_g6_i3|m.17173
lcl|c232242_g3_i1|m.17174
lcl|c232294_g5_i11|m.17226
lcl|c210331_g2_i2|m.2158
lcl|c232338_g2_i2|m.17255
lcl|c232350_g3_i1|m.17265
lcl|c232381_g2_i3|m.17311
lcl|c232401_g7_i2|m.17338
lcl|c232410_g1_i2|m.17346
lcl|c232424_g1_i6|m.17358
lcl|c232440_g3_i1|m.17372
lcl|c210338_g2_i1|m.2161
lcl|c232541_g3_i1|m.17498
lcl|c232555_g1_i2|m.17516
lcl|c232638_g9_i1|m.17634
lcl|c232653_g3_i1|m.17643
lcl|c232676_g1_i2|m.17666
lcl|c232684_g7_i2|m.17670
lcl|c210342_g3_i4|m.2163
lcl|c232692_g3_i1|m.17680
lcl|c232716_g1_i2|m.17708
lcl|c232737_g3_i2|m.17725
lcl|c232744_g5_i2|m.17733
lcl|c232769_g4_i2|m.17751
lcl|c232783_g1_i1|m.17764
lcl|c210398_g1_i3|m.2174
lcl|c232791_g2_i3|m.17780
lcl|c232804_g4_i5|m.17788
lcl|c232813_g1_i6|m.17800
lcl|c232813_g3_i2|m.17801
lcl|c232834_g2_i9|m.17824
lcl|c232842_g1_i1|m.17827
lcl|c232847_g2_i2|m.17831
lcl|c232847_g6_i1|m.17834
lcl|c232854_g3_i11|m.17840
lcl|c232949_g3_i7|m.17939
lcl|c232983_g2_i2|m.17991
lcl|c233001_g2_i4|m.18006
lcl|c233033_g3_i4|m.18064
lcl|c233042_g5_i1|m.18070
lcl|c233061_g7_i1|m.18094
lcl|c233068_g2_i1|m.18098
lcl|c233068_g2_i3|m.18101
lcl|c233156_g1_i1|m.18213
lcl|c233181_g4_i3|m.18256
lcl|c167783_g1_i1|m.480
lcl|c210579_g1_i2|m.2209
lcl|c233247_g1_i1|m.18311
lcl|c233287_g2_i1|m.18368
lcl|c233339_g2_i12|m.18429
lcl|c233348_g2_i1|m.18445
lcl|c233370_g1_i2|m.18468
lcl|c233425_g3_i4|m.18529
lcl|c233431_g1_i6|m.18546
lcl|c233449_g1_i1|m.18576
lcl|c210580_g1_i3|m.2210
lcl|c233547_g3_i1|m.18698
lcl|c233547_g4_i3|m.18699
lcl|c233552_g1_i1|m.18704
lcl|c233583_g1_i3|m.18737
lcl|c233596_g1_i1|m.18749
lcl|c233650_g1_i7|m.18822
lcl|c233702_g11_i7|m.18877
lcl|c233739_g1_i1|m.18926
lcl|c233739_g3_i1|m.18931
lcl|c233761_g2_i1|m.18976
lcl|c233766_g4_i1|m.18988
lcl|c233818_g2_i6|m.19032
lcl|c233873_g4_i1|m.19119
lcl|c233954_g6_i2|m.19250
lcl|c234004_g4_i3|m.19315
lcl|c234041_g5_i1|m.19364
lcl|c234054_g3_i2|m.19385
lcl|c234060_g2_i2|m.19387
lcl|c234075_g1_i1|m.19400
lcl|c234140_g5_i2|m.19531
lcl|c234149_g3_i1|m.19536
lcl|c234277_g5_i1|m.19677
lcl|c234352_g2_i1|m.19757
lcl|c234439_g3_i1|m.19847
lcl|c234446_g3_i2|m.19850
lcl|c210735_g5_i3|m.2260
lcl|c234639_g1_i1|m.20058
lcl|c234657_g3_i4|m.20097
lcl|c234687_g3_i2|m.20140
lcl|c234705_g1_i1|m.20159
lcl|c234712_g2_i1|m.20167
lcl|c234733_g4_i1|m.20188
lcl|c234738_g1_i1|m.20193
lcl|c234738_g1_i3|m.20194
lcl|c210749_g1_i1|m.2273
lcl|c234788_g2_i3|m.20258
lcl|c234789_g3_i1|m.20259
lcl|c234877_g1_i1|m.20373
lcl|c234891_g1_i3|m.20389
lcl|c234903_g3_i2|m.20397
lcl|c234934_g3_i3|m.20432
lcl|c235036_g1_i1|m.20514
lcl|c235079_g5_i3|m.20543
lcl|c210957_g4_i1|m.2306
lcl|c235126_g4_i1|m.20601
lcl|c235184_g7_i1|m.20675
lcl|c235213_g4_i11|m.20710
lcl|c235239_g6_i4|m.20736
lcl|c235240_g3_i2|m.20738
lcl|c235294_g4_i1|m.20789
lcl|c210994_g1_i1|m.2320
lcl|c235326_g4_i1|m.20819
lcl|c235389_g5_i2|m.20890
lcl|c235399_g7_i4|m.20891
lcl|c235463_g4_i2|m.20952
lcl|c235481_g2_i1|m.20956
lcl|c235526_g4_i1|m.21004
lcl|c235585_g2_i7|m.21110
lcl|c235619_g2_i4|m.21138
lcl|c235627_g4_i5|m.21151
lcl|c235649_g2_i5|m.21175
lcl|c235649_g2_i5|m.21176
lcl|c235651_g1_i2|m.21178
lcl|c235663_g1_i3|m.21185
lcl|c235690_g8_i1|m.21219
lcl|c235712_g3_i3|m.21245
lcl|c235722_g2_i1|m.21267
lcl|c235743_g4_i1|m.21296
lcl|c235757_g3_i5|m.21305
lcl|c235769_g7_i2|m.21324

## Sheet: E_R.S.ValidProt_ADJNSAF
	PROTID	10BT2_43_ADJNSAF	10NBT1_22_ADJNSAF	10NBT2_90_ADJNSAF	13BT2_71_ADJNSAF	13NBT1_112_ADJNSAF	13NBT2_101_ADJNSAF	20NBT1_73_ADJNSAF	20NBT2_123_ADJNSAF	21BT2_40_ADJNSAF	21NBT1_35_ADJNSAF	21NBT2_26_ADJNSAF	25NBT1_102_ADJNSAF	25NBT2_32_ADJNSAF	25NBT2_109_ADJNSAF	26BT2_127_ADJNSAF	26NBT1_81_ADJNSAF	26NBT2_49_ADJNSAF	28NBT1_120_ADJNSAF	28NBT2_24_ADJNSAF	55BT2_96_ADJNSAF	55NBT1_19_ADJNSAF	55NBT2_79_ADJNSAF	5BT2_110_ADJNSAF	5NBT1_39_ADJNSAF	5NBT2_66_ADJNSAF	66BT2_17_ADJNSAF	66NBT1_129_ADJNSAF	66NBT2_119_ADJNSAF	73BT2_21_ADJNSAF	73NBT1_91_ADJNSAF	73NBT2_108_ADJNSAF	74BT2_88_ADJNSAF	74NBT1_64_ADJNSAF	74NBT2_42_ADJNSAF
1	lcl|c122204_g1_i1|m.116	0	0	0	0	0	0	52.1218	61.7505	0	0	0	0	5.0374	0	0	0	0	10.458	5.5158	0	0	0	0	0	0	0	0	0	0	0	0	0	0	0
2	lcl|c169761_g1_i1|m.505	84.4202	61.6074	71.6093	38.9054	18.5191	24.8965	24.1825	56.2766	13.7374	7.3578	6.8323	10.7349	7.3454	0	16.7018	9.6155	21.0294	0	0	23.802	60.6317	21.3949	10.469	7.1878	7.8495	29.8122	21.0818	14.388	0	0	0	0	4.0172	0
3	lcl|c211238_g1_i1|m.2379	0	0	0	6.9852	0	0	0	0	0	0	0	0	0	0	0	0	0	24.6413	0	8.5469	17.4175	15.3652	0	0	0	16.0577	0	23.2492	0	8.0857	0	8.014	0	7.6243
4	lcl|c235791_g2_i4|m.21334	5.1581	0	0	0	0	0	0	0	0	0	5.427	0	0	0	0	0	0	0	0	0	0	0	0	0	0	0	0	0	0	0	0	0	0	0
5	lcl|c235791_g2_i8|m.21336	0	11.4417	0	10.2361	0	0	0	0	0	0	0	0	11.5956	0	0	0	0	0	0	0	0	0	0	11.3468	12.3914	11.7655	0	0	0	0	0	11.7438	12.6833	0
6	lcl|c235847_g2_i10|m.21377	0	0	0	0	3.5688	3.4269	0	7.2299	0	0	0	0	0	0	3.2185	0	6.7542	0	0	0	0	0	0	0	0	3.5906	3.3855	3.4658	0	0	0	3.584	0	0
7	lcl|c235850_g2_i3|m.21382	6.6529	14.8509	15.4448	0	7.5891	14.575	7.0785	15.3746	14.0738	7.538	6.9997	7.3318	0	0	6.8443	6.5673	0	0	8.24	8.1283	8.2822	14.6126	7.1502	7.3638	8.0417	15.2712	14.3987	14.7403	6.9914	15.3793	14.7498	0	8.2312	7.2508
8	lcl|c235861_g2_i5|m.21394	24.5846	27.4394	28.5368	27.003	42.0661	21.5437	52.3148	56.8142	33.8047	50.1397	33.6258	40.6403	38.9319	0	20.2336	29.122	45.1143	57.7318	36.5392	15.0184	61.2109	35.0989	26.4224	43.5388	41.6036	47.9671	34.5852	49.0233	25.8356	22.7326	35.4285	36.613	54.7506	48.2295
9	lcl|c235937_g3_i1|m.21493	0	0	0	0	0	0	0	0	0	0	0	0	0	0	0	20.4967	0	0	0	0	25.8489	11.4015	0	0	0	23.8308	0	0	0	0	23.0173	0	0	0
10	lcl|c235959_g6_i1|m.21503	41.8764	32.3578	18.6956	9.6495	22.0473	10.5856	78.8288	48.3875	17.036	29.1986	13.5567	21.3	36.4369	36.1946	66.2791	41.3377	41.7263	60.5157	47.8764	11.8069	36.0914	14.1505	13.8483	57.0479	27.2561	77.6385	45.3162	74.9398	16.9259	22.3395	28.5669	33.2122	39.8547	31.597
11	lcl|c235993_g2_i2|m.21545	4.1057	0	4.7657	4.0996	4.6834	0	0	0	0	4.6519	0	4.5247	9.2882	0	4.2238	8.1057	4.4319	9.6414	0	0	5.1112	4.5089	8.8252	0	4.9628	4.7121	0	0	8.6292	14.2365	9.1025	4.7034	5.0797	0
12	lcl|c236015_g2_i16|m.21586	0	0	7.8833	20.3443	7.7472	7.4393	0	0	14.367	0	0	29.9383	7.6821	0	0	20.1124	0	0	0	0	8.4548	7.4585	0	0	8.2093	7.7947	14.6987	7.5237	14.2741	15.6997	0	0	0	0
13	lcl|c236024_g3_i2|m.21588	5.3441	5.9647	6.2033	10.6724	0	11.7078	0	0	0	0	0	0	0	0	0	0	0	0	0	0	0	0	11.4873	0	0	0	0	0	0	0	0	0	0	0
14	lcl|c211278_g7_i1|m.2402	0	0	0	0	0	0	0	0	0	0	0	0	0	0	0	0	0	0	0	0	7.8955	0	0	0	0	14.5581	0	0	0	0	7.0306	0	0	0
15	lcl|c236035_g1_i2|m.21599	419.132	1108.86	666.702	620.017	531.235	918.225	792.793	843.041	919.489	668.37	702.3	718.52	755.041	0	335.372	490.359	251.351	1111.83	961.329	701.744	405.828	716.017	400.413	687.292	863.148	374.144	806.33	722.277	880.919	717.702	808.783	355.669	614.597	829.012
16	lcl|c236073_g1_i1|m.21645	0	0	5.5	9.4625	0	0	0	0	0	0	9.9705	0	0	0	0	0	5.1147	5.5634	0	5.7891	5.8987	0	0	0	5.7274	0	5.1275	0	0	0	0	5.4281	0	0
17	lcl|c236101_g5_i2|m.21702	0	3.272	6.8057	0	0	9.6337	6.2383	0	3.1008	3.3216	3.0844	0	0	0	3.0159	5.7877	3.1645	0	10.8928	7.1634	3.6495	6.439	6.3015	3.2449	17.7179	6.7292	0	6.4953	15.4038	0	6.4995	10.0752	3.6271	6.3901
18	lcl|c236120_g2_i1|m.21731	83.8949	0	13.9117	83.7707	95.7004	52.5129	178.524	207.727	76.0607	67.8975	138.707	52.8324	54.2266	0	98.6389	23.6616	51.7487	84.4328	74.2202	73.2145	44.7604	26.3242	25.7619	66.3287	72.4349	82.5317	90.7862	106.217	100.759	55.4108	66.4285	82.3792	44.4849	117.559
19	lcl|c236131_g3_i3|m.21740	3.6546	12.237	10.6053	3.6492	20.8444	4.0032	9.721	23.2257	7.7311	14.4929	21.1481	10.069	10.3347	0	0	14.4304	15.7799	17.1642	15.8425	8.9302	9.0993	10.0339	7.8556	10.1129	15.4614	20.9722	9.887	14.1702	7.6812	25.3449	16.205	10.4667	11.3041	5.9746
20	lcl|c236134_g1_i2|m.21741	2.7098	3.0245	1.5727	8.1174	1.5456	4.4525	2.8832	4.6967	1.4331	0	1.4255	1.4932	4.5978	0	1.3939	2.675	2.9251	0	5.0344	4.9662	3.3735	0	13.1058	4.4991	6.551	10.8853	2.9324	4.503	9.967	7.8303	4.5059	4.6565	11.7344	2.9534
21	lcl|c236135_g4_i5|m.21746	20.2061	7.5175	23.4545	13.4508	30.7326	7.3778	21.4988	7.7826	7.1241	7.6315	7.0864	14.8455	15.2372	0	6.9292	6.6487	0	7.9083	16.6842	16.4581	33.5395	7.3969	7.2389	7.4551	24.4243	23.1907	0	22.3846	14.1562	23.355	7.4663	15.4319	41.6663	14.6814
22	lcl|c236172_g4_i2|m.21786	0	0	0	0	18.0517	0	0	0	0	0	0	0	0	0	0	0	0	0	0	0	0	0	68.0313	0	0	0	0	0	0	0	0	0	0	0
23	lcl|c236181_g1_i10|m.21802	11.8975	0	0	0	0	0	0	0	0	0	0	0	0	0	0	5.8722	0	0	0	0	0	0	0	0	0	6.8274	0	6.5901	0	0	6.5944	6.8148	0	0
24	lcl|c236181_g1_i2|m.21806	5.4151	0	6.2857	10.8142	0	0	0	0	0	6.1356	0	5.9678	0	0	0	0	0	6.3582	6.7069	0	0	0	0	0	0	6.215	5.86	0	5.6907	6.259	12.0057	6.2035	0	0
25	lcl|c211368_g3_i1|m.2426	69.8554	25.989	27.0285	34.8759	119.528	76.5188	37.1622	26.9056	49.2583	26.383	36.7482	12.8307	26.3387	0	35.9327	57.464	25.1351	27.3401	0	0	101.457	38.3581	25.0258	77.3203	84.4384	66.8114	62.9945	90.2846	24.47	53.8277	38.7183	80.0255	144.046	25.3779
26	lcl|c236286_g4_i1|m.21959	0	0	3.032	2.6082	0	8.5838	2.7792	3.0183	2.7629	0	13.7413	0	2.9547	0	0	0	2.8196	6.134	3.2352	6.3828	3.2518	0	0	8.6738	3.1574	8.9938	2.8267	5.7875	0	0	2.8956	2.9924	3.2318	2.8469
27	lcl|c236325_g1_i10|m.21998	0	0	9.7025	0	0	0	0	0	0	0	0	0	0	0	0	0	0	0	0	0	10.4058	0	0	0	0	9.5934	0	0	0	0	9.2659	0	0	0
28	lcl|c236333_g1_i1|m.22011	0	0	0	2.481	0	0	0	0	0	5.6305	2.6142	0	0	0	0	0	0	2.9174	9.2323	0	0	2.7287	0	2.7502	6.0068	0	0	2.7526	0	0	0	0	0	2.708
29	lcl|c236351_g2_i1|m.22019	19.6381	65.7553	56.9877	49.0224	78.4051	43.0226	52.236	56.7286	31.1574	44.5015	51.6542	32.4633	44.4266	0	0	29.0782	31.7974	103.761	60.8069	35.9898	24.4475	32.3502	21.1061	54.3416	59.3442	45.0776	63.7535	54.3883	72.2306	45.3968	65.308	78.74	24.2969	64.2092
30	lcl|c236389_g1_i1|m.22061	4.1687	4.6528	9.6777	0	0	9.1327	4.4354	19.2674	4.4093	4.7233	13.1579	0	14.1461	0	4.2886	4.1151	8.9998	4.8947	0	5.0932	15.5689	4.5781	4.4803	0	10.0779	14.3533	9.0222	13.8544	4.3808	4.8183	9.2422	4.7756	5.1577	18.1734
31	lcl|c236415_g5_i1|m.22087	0	0	0	0	0	0	0	0	0	0	0	0	0	0	0	0	0	0	0	0	0	9.1096	0	0	5.0133	19.0404	0	0	0	0	0	4.7513	0	0
32	lcl|c236416_g2_i2|m.22088	5.7192	0	6.6386	0	0	0	0	6.6084	0	0	0	0	0	0	0	0	0	0	7.0835	0	14.2396	6.2809	0	0	0	13.1278	0	0	6.0102	6.6104	0	19.6554	7.076	0
33	lcl|c236507_g1_i5|m.22184	0	10.2781	0	0	0	0	29.3938	31.9219	9.7404	20.8679	0	10.1486	10.4164	0	0	0	0	21.625	22.8112	0	0	0	0	10.1929	0	10.569	0	20.4033	9.6774	0	10.2082	0	11.3935	0
34	lcl|c236507_g1_i6|m.22186	3.6546	8.158	4.2421	3.6492	0	0	7.7768	0	11.5967	4.1408	7.6902	8.0552	8.2677	0	0	0	7.8899	4.2911	9.0529	13.3953	9.0993	4.0135	3.9278	4.0452	8.8351	4.1944	0	4.0486	11.5217	8.4483	8.1025	4.1867	4.5216	7.9662
35	lcl|c236523_g2_i4|m.22204	34.3873	46.0565	39.9155	58.3718	82.375	37.6675	47.5634	27.8138	40.0094	50.651	32.5617	45.476	70.0141	12.8794	70.7536	64.4954	29.6955	64.6012	38.3315	54.6174	72.7751	45.3175	51.7411	72.3179	54.0358	78.9333	40.9331	34.2853	32.5234	43.7208	57.179	63.03	59.5634	44.9735
36	lcl|c211415_g1_i1|m.2432	30.9486	34.5423	35.9239	41.2036	35.3036	33.9007	54.8808	71.5211	32.735	58.4434	65.1235	22.738	23.338	0	63.6782	61.1009	22.2716	84.789	25.5543	50.4161	12.8427	56.6469	22.1748	34.2558	37.4094	47.36	89.3087	45.7137	43.3645	59.6192	34.3074	47.2725	38.2908	67.4603
37	lcl|c236527_g2_i1|m.22205	122.356	87.7913	142.026	126.538	114.65	110.094	51.1436	191.873	50.8431	74.2686	142.527	101.132	88.9724	0	121.381	185.487	207.55	56.4394	92.0092	128.135	114.241	119.976	117.413	48.3684	84.5138	90.276	217.525	62.9329	91.8444	191.932	193.765	115.139	91.9115	95.2523
38	lcl|c236562_g3_i1|m.22244	173.605	172.235	324.661	173.348	231.04	285.248	184.711	390.051	214.23	644.745	324.718	233.838	250.918	0	109.145	257.058	208.22	543.567	274.747	424.211	144.081	264.799	165.851	277.56	233.163	254.595	281.798	427.383	364.878	211.807	331.435	320.418	143.194	346.882
39	lcl|c236655_g1_i2|m.22362	57.5279	128.416	37.0979	76.5903	72.9146	105.026	197.227	177.26	74.3704	0	6.7252	21.133	21.6907	0	19.7278	56.7879	55.1987	52.536	23.7505	7.8095	63.6593	0	0	14.1501	7.7264	51.3531	89.9216	35.4057	20.1517	44.3287	14.1714	7.3226	63.2673	6.9665
40	lcl|c236666_g2_i2|m.22384	17.8138	19.8823	20.6775	8.8937	20.3205	48.7825	47.3834	61.7505	47.105	40.3675	28.1134	39.2634	30.2247	0	36.6527	17.5846	19.229	41.8319	33.0949	21.7643	22.1764	9.7817	9.5727	49.2935	10.7663	20.445	48.1925	69.0702	46.8005	41.1796	19.7471	0	22.0399	58.2444
41	lcl|c236706_g2_i4|m.22417	164.09	109.886	63.4897	54.6156	49.9147	95.8624	23.2783	12.6402	185.132	123.947	138.114	72.3343	37.1216	0	11.2541	21.5972	23.6169	115.599	54.1957	40.096	27.2368	36.0411	58.7855	60.5416	185.122	163.217	59.1895	206.018	91.9677	37.9322	84.8858	75.1918	81.2072	154.993
42	lcl|c236734_g2_i3|m.22454	10.5841	0	36.857	10.5685	0	0	0	0	0	11.9923	33.4075	11.6643	0	118.925	0	62.688	0	49.7093	0	64.657	13.1762	69.7419	0	11.7152	25.5874	48.5901	0	11.7253	0	24.4671	46.9313	36.3752	13.0951	11.5354
43	lcl|c236795_g1_i2|m.22544	0	16.8447	0	15.0699	17.2159	0	32.1154	0	0	0	31.7577	33.2648	34.1427	0	0	0	0	0	18.6925	0	0	0	48.6613	50.115	0	0	0	16.7194	0	0	50.1904	0	56.018	32.8973
44	lcl|c236813_g3_i2|m.22564	83.2945	74.7379	58.7693	44.0318	26.0827	35.7803	66.033	88.6967	0	0	0	30.5983	42.4902	0	42.0055	33.8565	74.0453	42.1882	86.9819	11.9726	20.3321	3.5873	42.1276	32.5396	25.6643	7.4979	15.9064	16.2838	0	0	0	14.968	46.4758	56.9605
45	lcl|c236822_g3_i10|m.22574	8.408	20.1094	12.5482	9.595	12.3315	6.5786	6.39	1.3879	0	0	1.2638	10.5898	6.7933	0	13.5928	11.857	14.2624	2.8206	5.9507	1.4675	10.4672	3.9574	7.7456	11.9656	10.1633	8.2714	14.2979	6.6532	8.8359	12.495	17.3096	16.5123	23.7777	7.8546
46	lcl|c236844_g2_i5|m.22607	50.738	42.4723	80.9802	25.3314	36.1736	20.8417	40.488	73.2836	60.375	50.3023	53.3827	27.958	28.6958	380.067	32.6237	137.735	82.1536	37.2337	54.9865	54.2414	86.8504	83.5818	156.776	28.08	38.3313	80.0697	34.3161	42.1562	39.9898	109.959	112.489	94.453	31.3875	55.2982
47	lcl|c211436_g1_i2|m.2434	0	0	10.8735	0	0	10.2611	9.9669	0	9.9083	21.2277	19.7117	0	0	0	0	18.4942	0	0	11.6022	22.8901	23.3234	30.8628	0	10.3686	45.2926	21.5025	0	0	49.2212	10.8274	10.3842	10.7314	11.5899	10.2095
48	lcl|c236878_g1_i2|m.22651	11.4988	0	3.3368	2.8704	9.8377	0	0	6.6433	3.0406	3.2572	9.0736	0	0	0	2.9574	0	6.2062	0	7.121	3.5122	3.5787	6.3141	3.0896	0	6.9497	6.5987	3.1108	0	6.042	0	3.1867	0	7.1134	3.1331
49	lcl|c236902_g2_i4|m.22682	0	26.3657	0	0	0	0	0	0	0	0	0	0	0	0	0	0	0	0	0	0	0	0	0	0	0	0	8.521	0	0	0	0	0	0	0
50	lcl|c236923_g1_i10|m.22692	3.2023	10.7224	3.7171	0	7.3058	7.0155	10.2214	7.4004	3.3871	7.2566	3.3692	10.5872	7.2444	0	0	3.1611	3.4567	7.5199	3.9662	3.9124	7.973	3.5168	0	21.2669	7.7416	3.6753	10.396	10.6426	6.7304	3.7013	3.5498	3.6685	11.8859	13.9604
51	lcl|c237097_g2_i1|m.22905	4.5785	4.0882	6.3775	11.8866	13.5793	4.0122	4.8714	2.1162	9.6856	2.0751	3.8537	8.0733	3.1074	0	3.7682	4.5196	1.9769	0	2.2683	6.7127	6.8398	4.0226	8.8574	3.0407	6.6412	2.1019	5.9455	4.0577	6.7361	10.5841	2.0302	13.6373	6.7977	3.992
52	lcl|c237098_g1_i2|m.22911	31.96	45.8629	26.4985	41.0305	57.29	25.0061	29.1468	15.8268	28.9755	67.2509	24.0185	60.3799	56.8089	0	14.0913	27.0419	9.8569	64.3297	28.2744	44.626	62.5225	55.1554	39.2562	65.697	66.2262	57.6412	19.763	35.4057	43.1823	47.495	75.9183	36.613	39.5421	44.7846
53	lcl|c237104_g1_i8|m.22918	0	0	5.0656	0	0	0	2.3216	0	0	2.4723	0	0	0	0	0	0	0	2.562	0	2.6659	0	0	0	0	0	0	0	0	0	0	4.8376	2.4997	0	2.3781
54	lcl|c237130_g1_i4|m.22955	0	11.6617	0	0	0	0	16.6753	0	0	5.9193	10.9931	5.7574	0	0	0	0	5.6393	6.134	0	6.3828	0	0	11.2295	11.565	0	0	11.3067	5.7875	0	0	17.3736	11.9696	6.4636	0
55	lcl|c237136_g1_i1|m.22958	19.4043	24.0639	7.5079	36.5982	29.513	11.8085	34.4094	19.93	27.3657	29.3145	40.8314	30.8888	31.7039	0	24.3988	36.181	13.9639	17.7205	32.0443	26.3417	32.2086	30.7812	23.172	16.705	31.2735	22.2705	23.3313	28.6618	40.7833	37.3803	31.0703	44.4586	29.3427	30.5475
56	lcl|c237136_g3_i1|m.22962	9.7602	43.5744	11.3293	48.7289	33.401	32.0737	72.6924	78.9445	51.618	33.1763	41.0759	53.7815	0	0	30.1232	38.5387	52.6784	34.3798	48.3543	35.7743	24.3011	21.4376	41.9594	43.213	47.1911	67.2114	42.2478	54.0626	92.3119	33.8437	21.639	44.7249	48.3029	42.5498
57	lcl|c237191_g2_i5|m.23010	32.9587	30.0976	24.3455	20.9427	23.9251	29.5385	9.5638	3.4621	22.1844	23.7641	31.5242	16.5101	10.1675	0	15.4123	23.6616	25.8744	31.6623	14.844	10.9822	18.6502	16.4526	25.7619	13.2657	28.9739	41.2658	29.1813	16.5964	28.3384	24.2422	23.25	41.1896	14.8283	32.6554
58	lcl|c211551_g6_i4|m.2453	0	0	0	0	0	0	7.6398	0	7.5949	48.8144	0	0	0	0	7.3871	0	0	0	35.5734	0	0	0	7.7172	0	8.6794	16.4821	0	0	22.6374	0	0	0	0	0
59	lcl|c237207_g2_i2|m.23024	7.4427	8.307	12.9589	3.7159	4.245	0	0	0	7.8723	0	3.9153	0	0	0	3.8284	3.6735	0	0	4.6091	4.5467	4.6327	0	3.9996	4.119	0	12.8131	4.027	0	7.8215	0	4.1252	4.2632	9.2084	4.0558
60	lcl|c237211_g6_i4|m.23025	7.5812	8.4615	0	7.57	4.324	4.1522	8.0662	4.38	4.0094	4.2949	0	4.1774	4.2877	0	7.7994	14.9674	4.0918	8.9014	0	0	14.1568	8.3258	8.1479	4.1957	9.1639	4.3505	0	4.1993	3.9835	8.7626	8.404	4.3425	9.3798	4.1313
61	lcl|c237215_g1_i1|m.23031	29.2107	29.3424	27.1253	37.9177	23.3248	35.1968	21.7556	16.8762	27.8071	29.7873	15.3667	19.3151	13.2165	0	12.0205	17.301	18.9189	17.1488	25.3253	28.551	40.001	25.6637	21.9761	29.099	31.7779	100.576	18.9661	29.1241	30.6971	23.634	29.1428	50.1952	14.4562	41.3869
62	lcl|c237256_g2_i1|m.23076	0	10.051	0	0	20.545	0	9.5814	0	0	0	9.4747	9.9243	0	0	0	0	9.7208	0	11.1535	11.0024	0	0	0	0	0	10.3355	0	0	0	0	9.9826	10.3164	0	9.8147
63	lcl|c237299_g2_i1|m.23132	0	0	1.9916	0	0	0	0	0	0	1.944	1.8052	0	1.9407	0	0	0	0	0	4.2501	0	0	0	1.844	1.8991	0	0	0	1.9007	0	1.9831	0	0	0	0
64	lcl|c237320_g5_i2|m.23157	0	8.5011	8.8411	22.816	17.3768	25.0295	16.2078	0	8.0563	8.63	0	16.7879	8.6154	0	15.6716	15.0373	8.2218	0	0	9.3058	0	8.3647	24.558	8.4306	18.4133	34.9667	8.2423	16.8756	8.0042	8.8036	16.8865	17.4511	9.4236	16.6024
65	lcl|c237325_g2_i1|m.23163	4.3235	0	0	4.3171	0	4.7359	0	0	4.5731	9.7974	0	0	0	0	0	0	4.667	0	5.3549	0	0	0	0	4.7855	0	4.9621	0	0	0	4.9973	0	0	0	0
66	lcl|c237387_g1_i1|m.23217	5.2131	1.9395	8.0682	6.9405	9.9111	9.5173	5.5466	4.0158	9.19	3.9378	7.3131	7.6601	5.8967	0	3.5754	5.146	3.7515	8.1612	4.3045	2.1231	8.653	5.7251	3.7352	1.9234	2.1005	13.9606	5.6413	5.7751	7.3045	10.0425	11.5577	7.9627	8.5998	5.6816
67	lcl|c237405_g1_i2|m.23236	20.9641	11.6992	12.1672	5.2333	11.957	22.9638	11.1526	18.1677	11.0871	11.8766	16.5426	17.3277	11.8566	0	16.1755	15.5208	11.3148	12.3075	6.4913	19.21	13.0491	11.5115	11.2656	5.8011	12.6703	6.0152	17.0146	11.6122	16.5231	12.1155	17.4295	24.0162	12.9688	17.1362
68	lcl|c237440_g3_i2|m.23273	0	64.9725	101.357	58.1266	83.0054	47.8242	92.9054	100.896	15.3932	65.9576	107.182	64.1536	16.4617	0	44.9159	43.098	31.4189	51.2628	54.0747	53.342	54.352	31.965	0	32.2168	35.1826	50.1085	78.7431	48.3667	0	16.8211	0	133.376	36.0115	31.7224
69	lcl|c211553_g1_i1|m.2455	0	20.2137	10.5111	9.0419	10.3296	9.9191	0	20.9265	9.578	10.2601	9.5273	0	0	0	0	0	9.7748	10.6323	0	11.0635	11.273	19.8894	0	0	0	10.3929	9.7991	10.0316	0	10.4665	0	0	44.8144	9.8692
70	lcl|c237490_g5_i6|m.23318	2.3402	1.306	1.3582	1.1684	1.3348	1.2817	1.245	0	1.2376	0	0	1.2895	0	0	0	1.1551	0	0	1.4492	1.4296	0	2.5701	0	1.2951	0	0	0	0	1.2296	2.7049	1.2971	5.3618	0	2.5505
71	lcl|c237560_g2_i1|m.23397	28.9513	22.6192	33.6055	31.7993	19.8151	28.5416	12.3214	26.7622	64.3071	29.5228	27.4143	28.7153	19.6487	0	29.7844	22.8631	15.6257	20.3958	21.5146	24.7603	21.6249	25.4358	18.6693	35.2496	31.4957	39.8732	18.7977	38.4872	36.5094	26.7704	38.512	26.533	10.7459	18.932
72	lcl|c237587_g5_i1|m.23455	46.1644	39.6346	49.4639	70.917	36.4573	46.6781	52.896	73.8584	41.3169	24.1413	37.3621	39.1351	32.1343	0	32.8796	49.076	42.1656	33.3562	30.7876	21.6932	61.891	35.0989	91.5977	35.3753	42.9244	65.2102	53.7992	23.6038	55.9771	57.4631	27.5555	52.8854	30.755	38.7027
73	lcl|c237591_g3_i1|m.23457	43.53	10.7966	0	38.6361	38.6209	26.4902	5.1461	0	51.1585	27.4008	35.6214	15.9908	43.7675	0	19.9034	9.5489	62.6513	5.679	47.9238	5.9093	30.1059	5.3117	72.7754	10.7071	0	16.6533	0	10.7163	15.2483	22.3616	32.1695	38.7859	11.9682	52.7138
74	lcl|c237591_g3_i4|m.23458	33.6389	6.8264	24.8479	61.0711	34.8841	77.0452	39.0447	42.4028	25.8768	17.3247	61.1322	33.7017	55.3458	0	18.8765	21.1312	42.9136	7.1813	18.938	0	22.8421	10.0753	69.0205	10.1546	14.786	21.0587	6.6186	23.7145	9.6411	38.8811	27.1198	17.5165	60.5372	36.6623
75	lcl|c237613_g1_i3|m.23496	8.4454	4.713	4.9015	0	4.8169	9.251	0	4.8792	8.9329	4.7845	0	9.3073	0	0	0	4.1684	0	4.9581	5.23	0	5.2568	4.6374	4.5384	9.3479	5.1042	0	4.5695	9.3559	17.7502	9.7615	4.681	4.8375	0	0
76	lcl|c237643_g4_i5|m.23532	0	0	2.5193	0	0	0	0	0	0	0	0	0	0	0	0	0	0	0	0	0	0	0	2.3326	0	0	2.491	0	0	0	0	0	0	2.6853	0
77	lcl|c237643_g4_i5|m.23533	0	5.5976	5.8215	0	0	0	0	0	0	0	5.2767	0	0	0	0	0	0	0	0	0	6.2435	0	0	0	0	5.7561	0	0	0	0	0	5.7454	0	5.466
78	lcl|c237693_g4_i3|m.23606	0	0	1.3505	1.1617	0	0	0	0	0	1.3182	1.2241	0	0	0	0	0	0	0	0	0	1.4484	1.2777	0	0	0	0	0	0	0	0	0	0	0	0
79	lcl|c211563_g8_i2|m.2460	23.4526	39.264	27.2229	23.4179	40.1292	38.5346	0	13.5496	24.8064	39.8593	24.6751	25.8461	26.5281	0	0	23.151	12.658	41.3052	58.0947	28.6537	14.5981	38.634	25.2059	51.9177	28.3486	26.9168	38.0686	38.9718	24.646	13.5537	25.9979	40.3006	29.0165	25.5605
80	lcl|c237702_g1_i1|m.23627	31.3454	69.9704	109.153	78.2473	125.147	120.174	33.3507	54.3285	49.732	88.7891	49.4688	34.5442	35.4559	0	16.1237	61.8843	16.9179	55.206	77.6458	57.4452	39.0219	68.8478	0	86.7375	37.889	35.9754	101.76	86.8121	49.4105	72.4603	69.4944	53.8633	38.7817	85.4065
81	lcl|c237753_g2_i2|m.23709	0	0	0	23.7251	21.683	31.2321	5.0561	0	0	21.5372	14.9993	0	0	0	0	0	0	5.5796	5.8857	0	0	0	0	0	0	0	0	0	0	0	0	0	0	0
82	lcl|c237792_g3_i2|m.23754	0	2.5841	2.6875	0	0	0	0	0	0	0	0	5.1031	0	0	0	2.2855	0	2.7185	0	5.6575	5.7646	5.0853	0	10.2508	2.7986	0	7.5164	5.1298	0	8.0283	2.5666	2.6524	0	5.0467
83	lcl|c237832_g1_i6|m.23803	0	0	15.258	26.2507	29.9891	14.3987	69.9288	0	13.9036	0	13.83	28.9726	14.8686	0	0	12.9757	0	30.8679	0	32.1199	0	28.8717	14.1275	29.099	31.7779	15.0864	14.2246	72.8101	27.6274	0	0	15.0586	16.2633	14.3262
84	lcl|c237887_g2_i1|m.23860	3.2995	7.3653	3.8299	0	0	0	0	0	6.9799	0	3.4715	0	0	0	0	0	0	0	0	0	0	0	3.5462	0	0	7.5738	3.5705	0	0	0	0	3.7799	0	7.1921
85	lcl|c237891_g2_i2|m.23861	2.9003	3.2371	3.3665	2.896	16.542	6.3539	3.0858	6.7025	3.0677	13.1446	3.0515	6.3925	6.5612	0	5.9675	2.863	3.1307	13.6214	17.9608	3.5435	7.2211	3.1851	3.1171	3.2102	3.5057	6.6574	6.277	6.4259	9.1436	3.3523	3.215	0	0	3.161
86	lcl|c237894_g6_i1|m.23869	283.471	284.749	361.946	353.814	388.032	807.328	271.445	442.187	434.758	337.244	372.808	281.16	1090.19	4459.18	335.372	419.737	1070.97	332.837	228.211	207.802	388.183	342.443	853.054	407.893	376.913	829.623	322.094	1177.62	163.842	344.029	864.148	422.164	315.649	247.159
87	lcl|c237953_g4_i1|m.23928	0	10.3073	5.3598	13.8318	10.5344	5.0579	4.9128	21.3415	4.884	20.9271	19.4325	15.266	10.4459	0	14.2509	27.3483	19.9372	27.1078	0	0	17.2448	10.1419	19.8505	5.1109	11.1628	21.1979	9.9935	10.2305	4.8524	16.0111	0	15.8691	11.4258	5.0324
88	lcl|c237969_g1_i5|m.23942	16.8908	4.713	4.9015	16.8657	0	4.6255	4.4928	4.8792	4.4664	0	8.8856	4.6536	4.7764	0	8.6884	4.1684	9.1164	29.7483	5.23	0	10.5137	4.6374	9.0767	0	5.1042	24.2321	9.1391	23.3898	4.4376	9.7615	4.681	0	0	4.6022
89	lcl|c238002_g5_i8|m.23981	0	0	0	0	0	0	0	0	0	0	0	0	0	0	0	0	0	0	0	52.9637	53.9665	66.6505	27.9544	57.579	52.3997	0	0	0	9.1112	30.0633	19.2219	0	0	0
90	lcl|c211604_g1_i1|m.2470	14.2354	39.7212	33.0479	28.4287	40.5965	46.78	45.4384	16.4488	22.5857	32.2587	29.9549	23.5323	24.1533	0	7.3225	35.1308	15.3664	50.1435	17.6314	52.1773	35.4435	54.7175	15.2996	31.5134	51.6217	65.3526	30.8095	39.4256	29.9196	41.1347	55.2314	8.154	17.6126	38.7872
91	lcl|c238048_g5_i2|m.24043	2.7958	3.1205	3.2453	1.3958	1.5946	3.0625	2.9747	1.6153	5.9144	3.1678	2.9415	1.5406	1.5812	0	0	0	1.509	3.2827	3.4628	3.4158	3.4805	0	0	1.5473	1.6897	0	1.5127	1.5486	2.9381	0	4.6489	1.6014	1.7295	3.0471
92	lcl|c238052_g1_i4|m.24050	325.189	434.644	363.486	352.768	375.528	369.401	392.979	417.5	441.627	368.453	333.691	376.073	508.608	436.059	491.494	471.601	472.367	395.961	358.012	362.971	499.788	365.945	487.572	346.608	427.045	350.184	460.512	346.906	354.393	533.636	351.58	331.14	496.711	284.408
93	lcl|c238085_g2_i5|m.24082	14.6843	8.1947	0	0	16.7506	0	54.6831	0	15.5319	16.638	7.7249	24.2743	24.9149	0	0	28.9908	0	0	45.4682	0	9.1403	16.1265	23.6731	0	8.8749	0	7.9453	0	23.1473	16.9727	24.417	0	9.084	8.002
94	lcl|c238115_g2_i1|m.24111	0	0	1.7567	0	0	0	1.6102	0	0	0	0	0	0	0	0	0	0	3.554	0	0	0	0	0	0	0	1.737	0	0	1.5904	1.7493	1.6777	1.7338	0	0
95	lcl|c238173_g3_i3|m.24203	25.0121	23.2638	19.3554	37.4627	33.2871	22.8317	44.3538	28.9011	17.6373	33.0631	4.386	64.3177	33.0075	0	30.0205	41.1507	40.499	34.2626	10.3263	30.5591	72.6546	36.6249	44.8032	36.9134	60.4674	81.3356	45.1112	9.2363	26.2849	33.7283	41.59	85.9609	36.1036	18.1734
96	lcl|c238175_g2_i3|m.24204	18.0106	30.153	20.906	35.9678	20.545	19.7286	19.1628	31.2164	38.1004	20.4068	9.4747	19.8486	10.1862	0	46.3221	17.7789	19.4415	10.5735	11.1535	0	56.0536	19.7795	9.6785	0	32.6557	31.0064	9.745	0	37.8541	31.226	9.9826	30.9491	77.9919	19.6293
97	lcl|c238196_g2_i3|m.24232	15.3288	0	5.931	0	0	0	0	0	0	0	0	0	0	0	0	0	0	0	0	0	0	0	0	0	0	0	0	0	0	0	0	0	0	0
98	lcl|c238200_g3_i4|m.24238	3.3401	3.7279	7.7541	0	0	3.6587	3.5538	0	3.5329	0	0	0	3.7781	0	3.4362	0	3.6054	0	8.2737	8.1616	0	3.6681	3.5898	3.697	0	7.6669	0	0	10.5301	3.8606	11.1077	7.6527	4.1325	7.2806
99	lcl|c238295_g3_i1|m.24347	0	0	0	0	0	0	0	0	0	0	0	0	0	0	0	0	0	0	0	0	0	0	0	0	0	0	0	0	0	6.5643	0	6.5061	0	0
100	lcl|c238338_g4_i1|m.24403	0	0	5.2702	0	0	4.9734	0	0	4.8023	0	0	5.0036	0	0	0	0	0	0	0	11.0943	5.6522	0	0	5.0255	0	20.8437	0	5.0298	4.7713	0	5.033	15.6039	0	4.9483
101	lcl|c211615_g1_i2|m.2471	111.86	53.5068	92.7447	175.519	91.1432	0	68.0092	55.3938	84.5119	72.424	50.4388	70.4432	72.3022	0	131.518	126.195	103.498	56.2885	79.1682	97.6194	179.042	87.7472	206.095	53.063	57.9479	146.723	121.048	0	0	73.8811	106.286	237.984	98.8552	156.746
102	lcl|c238340_g1_i7|m.24404	0	0	10.8735	9.3537	0	0	0	0	0	0	19.7117	0	10.596	0	9.6371	9.2471	10.1118	0	0	0	11.6617	0	0	0	11.3232	21.5025	0	10.3775	9.8442	0	0	10.7314	23.1798	0
103	lcl|c238365_g3_i1|m.24425	50.9362	113.702	29.5624	63.5759	101.682	13.9487	162.584	132.426	121.222	57.7129	0	70.168	57.6158	0	78.6028	62.8512	123.712	59.8066	78.859	77.7904	110.969	97.893	54.744	84.5691	61.5696	116.92	68.9002	126.963	107.056	88.311	70.5803	43.764	63.0202	55.5142
104	lcl|c238372_g5_i2|m.24429	2.4753	2.7627	2.8732	3.7074	1.4118	2.7114	1.3168	0	0	4.2069	5.2086	0	1.3999	0	1.2732	3.6651	2.6719	4.3595	4.5986	1.5121	1.5407	4.0775	1.3301	1.3699	1.496	2.8409	4.0179	2.7421	1.3006	2.861	2.7439	4.2534	4.5937	0
105	lcl|c238378_g1_i1|m.24441	86.2919	240.78	83.4703	90.951	125.778	152.287	51.0069	66.4726	126.768	124.931	136.185	89.815	97.6079	89.7768	49.3194	146.702	56.9236	213.896	130.628	169.858	131.297	131.621	128.809	201.639	150.665	93.5359	98.5679	164.637	166.252	127.445	154.114	126.315	130.489	130.622
106	lcl|c238385_g2_i1|m.24454	99.7934	86.63	51.4828	121.789	50.5938	72.875	129.773	140.934	93.8254	50.2534	93.3289	109.978	87.7955	0	91.2577	65.6731	95.7528	104.153	68.6663	27.0944	124.233	60.8858	95.3364	98.1845	93.8204	101.808	83.9927	98.2689	81.5666	76.8967	49.1661	38.1074	150.905	72.5083
107	lcl|c238409_g2_i5|m.24505	41.9732	15.6157	32.4806	34.9258	23.9398	15.3256	7.4431	0	14.7986	23.7787	7.3602	30.8378	23.7387	0	7.1968	6.9055	30.2053	8.2138	8.6643	8.5469	17.4175	15.3652	15.037	15.4862	8.4559	16.0577	7.5702	7.7497	22.0545	24.2571	38.7737	0	17.3103	15.2485
108	lcl|c238410_g2_i3|m.24507	0	0	0	0	0	0	0	0	0	0	0	13.2081	0	0	0	0	0	0	0	0	0	0	0	0	0	27.5106	0	0	0	0	0	13.7299	0	0
109	lcl|c238476_g3_i5|m.24565	0	0	0	14.4671	0	0	0	0	0	0	0	7.9836	0	0	7.4527	14.3021	7.8198	0	0	0	9.0184	0	0	0	0	33.2572	7.8393	16.0506	0	8.3732	8.0305	16.5979	0	7.8954
110	lcl|c238499_g4_i2|m.24591	0	0	2.543	2.1876	2.4991	4.7996	2.331	0	0	0	4.61	4.8288	2.4781	0	0	0	0	2.5723	2.7134	2.6767	2.7273	2.406	0	4.8498	2.6482	5.0288	0	7.281	0	0	0	2.5098	0	2.3877
111	lcl|c238537_g2_i7|m.24631	221.829	226.058	167.928	288.913	132.023	200.73	205.235	167.165	275.439	229.486	213.096	201.951	163.643	0	208.367	190.413	187.398	260.459	310.583	200.322	240.135	201.247	279.874	224.183	233.163	387.427	208.739	224.376	395.284	156.068	235.212	364.613	298.32	199.72
112	lcl|c176627_g1_i2|m.576	0	0	0	0	0	0	0	0	30.0356	25.7396	53.7779	0	0	0	0	0	0	0	0	0	7.0702	0	0	0	0	19.5545	0	0	0	0	0	0	0	0
113	lcl|c211660_g1_i1|m.2486	0	0	0	0	0	4.7109	9.1516	9.9387	0	4.8729	4.5249	9.4792	14.594	0	17.6977	12.7361	4.6424	0	0	0	32.1236	4.7231	4.6222	4.7603	5.1985	29.6156	0	0	9.039	0	4.7674	0	10.6419	4.6872
114	lcl|c238545_g4_i3|m.24636	0	0	0	0	0	5.5106	0	5.8129	0	0	0	0	0	0	0	0	0	0	0	0	0	5.5248	5.4068	0	0	5.7738	0	5.5731	0	5.8147	0	5.7632	12.4484	0
115	lcl|c238560_g5_i2|m.24666	22.2267	41.3461	25.7999	7.3979	8.4515	32.4625	47.2973	34.2434	23.5097	33.5784	15.5902	24.495	16.761	0	38.1105	14.6272	15.9951	43.4957	45.8816	18.104	9.2234	8.1366	23.8883	65.6051	35.8223	17.0065	24.0524	32.8308	46.7154	17.127	16.426	0	0	0
116	lcl|c238572_g3_i3|m.24677	29.9075	89.0143	75.2168	89.5896	142.15	70.9807	47.7312	51.8364	36.9061	90.3639	52.444	76.9058	67.6589	0	76.9202	59.0455	48.4254	46.821	49.3894	103.53	117.901	71.1638	53.5721	110.345	72.302	171.625	59.3343	38.6539	89.0497	109.466	77.3577	68.5234	98.6738	103.219
117	lcl|c238581_g1_i1|m.24692	66.3152	132.449	153.952	118.494	99.5354	126.166	133.688	185.516	73.8348	118.639	84.4606	134.626	122.387	0	111.312	196.387	150.703	143.433	164.27	85.2863	112.971	91.9936	123.789	169.983	135.005	176.256	135.971	108.264	117.372	137.163	185.715	159.937	107.957	129.335
118	lcl|c238591_g4_i10|m.24704	0	4.594	0	0	0	0	0	0	0	0	0	0	0	0	0	0	0	0	0	0	0	0	0	0	0	9.4481	0	0	0	4.7575	0	9.4306	0	0
119	lcl|c238657_g1_i1|m.24764	2.4076	4.0308	1.3973	0	2.7464	2.6373	1.2808	0	1.2733	2.7279	3.7997	1.3267	1.3617	0	1.2384	1.1883	1.2995	2.8269	1.491	0	0	2.6441	1.2938	1.3325	0	1.3816	1.3027	0	1.2651	1.3914	1.3345	2.7581	2.9788	1.312
120	lcl|c238662_g3_i1|m.24774	13.198	0	0	0	7.5276	0	0	0	62.8193	37.3849	27.772	0	0	0	0	0	0	30.9929	0	8.0625	0	7.2471	7.0923	0	15.9533	0	7.1411	21.9315	214.979	15.2548	14.6304	15.1195	0	43.1527
121	lcl|c238663_g1_i2|m.24780	3.8352	0	4.4517	11.4885	8.7497	4.201	8.1611	4.4315	4.0566	8.6909	8.0702	4.2266	4.3381	0	3.9456	3.7859	16.5596	4.5031	14.2503	0	4.7744	0	24.7314	4.245	9.2717	17.6068	0	8.4974	12.091	0	0	17.5742	4.7451	0
122	lcl|c238664_g1_i2|m.24781	0	0	0	3.8476	4.3956	12.6627	0	0	0	0	8.1084	4.2466	4.3586	0	0	3.8038	4.1595	9.0487	4.7726	9.4158	0	4.2318	4.1414	0	0	4.4225	0	12.8063	4.0494	0	4.2715	4.4143	4.7675	8.3993
123	lcl|c238677_g1_i1|m.24810	0	38.0592	0	6.8098	23.3388	14.9409	21.7686	0	14.4271	7.7273	0	15.0318	0	0	14.0323	6.7322	0	32.0303	16.8936	0	0	7.4897	0	30.1948	0	23.4818	7.3801	37.776	21.5008	7.8827	15.1201	7.8128	8.4379	29.7315
124	lcl|c211725_g14_i3|m.2532	0	0	0	0	0	0	0	0	0	0	10.362	5.4269	0	0	0	0	0	0	0	6.0164	0	0	0	0	0	0	0	0	0	0	0	5.6413	0	5.3669
125	lcl|c238692_g2_i2|m.24838	0	0	0	0	2.1721	0	2.026	0	0	0	2.0034	4.197	0	0	0	0	0	0	0	0	0	0	4.093	2.1076	2.3017	0	0	2.1095	0	4.4018	0	0	0	0
126	lcl|c238733_g2_i2|m.24867	324.517	189.332	42.8053	0	0	0	133.403	136.354	85.812	50.1397	116.397	8.1281	8.3426	0	265.566	182.013	342.338	0	54.8088	9.011	91.8163	16.1995	0	73.4718	329.857	59.2535	534.741	73.5349	0	0	8.1758	0	0	0
127	lcl|c238738_g2_i3|m.24871	0	5.3823	5.5976	0	5.501	0	10.2617	0	0	0	5.0737	0	0	0	0	9.5207	0	0	0	5.8918	6.0034	5.296	0	5.3377	5.8291	0	5.2185	10.6846	0	22.2955	5.3457	11.0489	5.9664	15.7673
128	lcl|c238756_g1_i5|m.24891	5.3529	2.9872	24.8538	10.6899	12.2123	8.7953	14.2384	12.3704	11.3238	12.1301	11.2638	14.748	21.192	0	5.5069	10.5681	5.7782	21.9978	9.9448	9.81	16.6596	11.7573	11.5061	5.9249	19.4111	21.5025	8.6889	11.86	22.5011	12.3742	11.8677	30.6611	0	8.751
129	lcl|c238756_g1_i5|m.24892	6.8199	11.4178	27.707	17.0245	7.7796	11.2057	0	3.9401	7.2136	3.8636	7.1754	11.2739	15.4285	0	14.0323	13.4644	0	12.0114	21.1171	24.9971	8.4901	14.9794	14.6595	7.5487	12.3654	19.5682	0	7.5552	17.9173	11.8241	18.9002	11.7192	4.2189	3.7164
130	lcl|c238814_g3_i2|m.24928	6.8486	11.4657	3.9748	6.8384	0	3.7509	7.2867	3.9567	3.6219	7.7597	0	7.5475	3.8733	51.3011	0	6.7605	3.6963	4.0206	4.2412	0	4.2629	3.7606	11.0408	3.7902	0	3.9301	3.7056	7.5869	3.5985	3.9579	7.5918	7.8456	8.4733	0
131	lcl|c238826_g2_i1|m.24957	12.5381	9.3294	14.5538	20.866	4.7675	13.7341	4.4468	4.8292	8.8412	18.9417	8.7945	9.2118	9.4549	0	12.8989	53.633	40.6029	9.8144	10.3528	5.1062	31.2175	13.7696	4.4918	18.504	35.3631	57.5606	13.568	18.5199	8.7841	48.3069	13.8989	19.1514	15.5127	13.665
132	lcl|c238833_g1_i2|m.24965	3.9514	3.3077	3.44	14.7959	9.0149	2.1642	2.1021	0	8.359	3.3578	7.2754	3.266	5.587	0	0	3.9006	1.0663	1.1599	0	4.8277	4.9191	4.3395	15.9255	3.2803	4.7763	9.0701	0	0	9.3431	7.9926	5.4753	14.7118	3.6666	1.0766
133	lcl|c238858_g2_i1|m.25014	0	3.7052	0	0	3.7868	7.2727	3.532	0	0	0	0	0	3.755	0	0	0	3.5834	0	0	4.0559	4.1327	3.6457	0	0	0	0	0	0	0	3.837	0	0	4.1072	0
134	lcl|c211774_g2_i1|m.2538	41.4396	77.086	48.1015	82.7565	78.7848	90.785	205.757	79.8046	87.6632	93.9057	58.1328	76.1144	15.6246	0	71.0534	68.1776	59.6426	113.531	102.65	16.8766	68.7844	121.359	74.2291	137.604	116.878	47.5606	74.7392	183.63	130.645	111.761	122.499	63.297	85.4511	45.1641
135	lcl|c238903_g3_i2|m.25053	51.136	67.7752	81.6154	63.8253	80.206	38.5094	47.6064	96.0159	40.5657	72.424	47.0762	24.6551	36.1511	11.9702	52.6074	37.8586	27.5993	67.5462	55.4178	50.7621	23.8722	49.1384	34.3491	31.8378	84.9902	77.0296	41.5023	49.568	70.5311	29.5524	42.5142	80.5486	35.5879	59.2152
136	lcl|c239007_g1_i1|m.25175	41.2648	0	95.7971	41.2036	31.3809	67.8014	0	7.9468	14.5489	0	14.4719	0	7.7793	0	7.0754	6.789	37.1193	8.0751	17.0362	25.208	59.9324	45.3175	7.3916	30.4496	24.9396	31.5733	7.4424	30.4758	7.2274	15.8985	38.1193	126.06	17.0181	29.9824
137	lcl|c239029_g3_i1|m.25195	0	0	0	5.0861	0	0	0	0	0	0	5.3591	0	5.7616	0	0	0	0	0	0	0	0	0	5.4744	0	12.3139	0	0	0	0	0	0	5.8352	6.302	0
138	lcl|c239101_g4_i2|m.25293	0	0	9.604	0	9.4382	0	17.6064	0	8.7515	0	0	9.1183	0	0	0	0	0	9.7148	0	0	0	0	0	0	0	0	0	9.1659	8.6949	0	9.1719	9.4785	0	9.0175
139	lcl|c239132_g4_i1|m.25330	19.5205	21.7872	11.3293	282.627	133.604	64.1475	186.923	124.056	30.9708	22.1175	82.1518	10.7563	22.0803	36.5558	40.1643	0	63.214	0	24.1771	0	60.7527	21.4376	377.635	118.836	70.7866	44.8076	0	21.625	328.22	157.937	216.39	44.7249	24.1515	53.1873
140	lcl|c239139_g1_i2|m.25341	25.898	0	24.4249	42.022	51.6991	33.6875	17.2218	20.5733	32.5291	27.5096	30.654	49.9468	27.4633	0	18.3172	33.5539	29.7029	26.6071	14.0333	17.7983	32.2406	33.7744	15.6567	39.4152	45.0002	20.4349	28.0254	17.9314	15.3089	39.2883	30.503	22.2514	40.0526	14.1128
141	lcl|c239139_g1_i7|m.25343	0	17.042	0	9.5289	0	0	0	0	38.3569	32.4382	0	16.8272	0	0	37.3072	0	20.6025	0	0	0	0	0	4.1026	0	0	0	0	0	0	0	0	0	0	0
142	lcl|c239148_g1_i1|m.25358	4.766	5.3194	5.5321	0	0	0	0	0	0	0	0	0	0	0	0	0	0	5.5959	5.9029	5.8229	5.9332	5.234	0	5.2753	17.2827	0	0	0	0	0	0	5.4598	0	5.1943
143	lcl|c239269_g3_i1|m.25540	0	5.5464	0	4.962	5.6687	0	0	0	5.2562	0	0	0	5.6211	0	0	0	0	17.5044	0	0	6.1864	0	0	0	6.0068	5.7034	0	5.5052	5.2222	5.7438	5.5087	5.6929	0	5.416
144	lcl|c239272_g3_i1|m.25542	4.6704	0	0	4.6635	0	0	0	0	0	5.2917	0	0	0	0	0	0	0	0	0	0	17.4425	0	0	5.1695	0	5.3602	0	0	9.816	0	5.1772	0	5.7784	0
145	lcl|c211861_g1_i1|m.2554	43.1777	72.2873	37.5893	32.3353	61.5669	47.2964	68.91	49.8911	45.67	36.6916	68.1424	47.5841	36.6299	121.288	33.3151	42.6223	58.2602	76.0454	80.2168	65.9416	94.0661	71.1275	23.2027	71.6877	78.2872	86.722	46.7244	71.7493	79.4059	49.9064	35.8978	86.5618	26.7106	35.2938
146	lcl|c239275_g1_i1|m.25549	5.1156	2.1411	5.938	5.108	5.106	3.5022	0.6804	0	3.3818	5.7962	6.055	4.933	3.6165	0	0.6579	5.0498	1.3805	0.7508	5.544	1.5625	8.7566	5.618	1.3745	0	3.0918	10.2746	2.0759	4.2504	14.1118	8.8692	11.3416	14.6509	3.9558	2.0908
147	lcl|c239283_g1_i2|m.25559	0	0	0	3.5381	0	0	0	0	0	0	0	0	0	0	0	0	0	0	0	0	0	0	0	0	0	0	0	0	0	0	0	4.0593	0	0
148	lcl|c239343_g4_i4|m.25612	7.8458	2.1892	6.8303	7.8341	2.2375	4.2971	4.1738	0	2.0747	4.4448	4.1274	8.6465	11.0933	0	2.0179	13.5535	6.3518	2.303	4.8587	7.1893	9.7672	12.9245	2.1081	2.171	14.2255	15.7582	4.2451	4.3458	2.0612	2.2671	2.1743	11.235	4.8535	6.4132
149	lcl|c239381_g2_i1|m.25706	10.338	3.8462	8	10.3227	27.5164	18.8736	3.6665	3.9818	18.2245	31.2357	7.2512	7.5954	11.6937	0	3.5452	10.205	22.3187	20.2305	12.8042	12.6307	17.1597	7.5689	7.4072	11.4428	12.4962	35.5951	26.1034	34.3578	14.4854	11.9491	11.46	7.8954	12.7906	26.29
150	lcl|c239392_g1_i1|m.25726	1.8212	0	2.114	1.8185	0	1.9949	1.9377	0	1.9263	2.0635	1.9161	2.007	2.06	0	1.8736	3.5955	1.9659	0	0	2.2251	2.2672	2	3.9147	0	2.2014	4.1804	0	0	0	2.105	2.0188	0	2.2532	1.9849
151	lcl|c239398_g2_i1|m.25730	0	0	0	0	0	0	0	0	0	0	0	0	0	0	3.347	0	0	0	0	0	4.0502	0	0	0	0	0	0	3.6042	0	0	3.6065	0	0	0
152	lcl|c239406_g1_i2|m.25742	55.3381	39.3044	40.8764	40.1863	40.1705	44.0849	74.936	58.1293	101.101	51.3004	58.2225	88.7062	34.1427	0	0	9.932	5.4304	64.975	68.5392	43.0248	31.3139	33.1489	97.3226	55.6834	12.1619	46.1906	27.2198	66.8775	63.4407	34.8883	5.5767	69.1579	37.3453	93.209
153	lcl|c239409_g1_i2|m.25747	347.724	751.948	570.12	434.012	1046.18	1409.31	911.051	788.512	583.876	901.245	749.991	910.126	1116.06	3255.91	192.28	1201.38	811.696	1709.67	979.786	1184.24	687.202	1427.26	1172.54	1169.08	646.235	244.44	743.167	1564.93	292.335	552.631	1353.94	438.184	376.441	677.421
154	lcl|c239444_g1_i9|m.25795	0	0	2.7701	4.7659	2.7223	5.2282	7.6174	2.7575	0	2.704	10.0434	5.26	2.6994	0	4.9103	7.0673	2.5761	2.8021	2.9558	2.9157	5.9418	0	2.5649	0	2.8847	5.4779	2.5825	0	2.5079	5.5167	0	2.7339	2.9526	2.601
155	lcl|c239464_g2_i1|m.25827	5.2579	0	0	0	5.9978	0	5.5943	0	0	0	0	0	0	0	0	0	0	0	6.5122	0	6.5456	0	0	5.8198	0	0	0	0	11.051	0	0	0	6.5053	0
156	lcl|c211914_g5_i4|m.2567	5.3267	5.9452	0	5.3188	6.0762	0	5.6674	0	0	0	0	0	18.0755	0	0	0	0	6.2543	0	6.508	19.8935	5.8498	0	0	0	12.2269	11.5284	0	0	0	5.9048	6.1022	6.5903	17.4162
157	lcl|c239483_g1_i2|m.25864	0	0	0	0	0	0	6.7744	0	0	0	0	0	0	0	0	0	0	0	0	0	0	0	0	0	0	0	0	0	3.3455	0	0	3.647	3.9388	0
158	lcl|c239496_g4_i3|m.25878	0	0	0	5.1833	0	0	0	0	0	0	0	0	0	0	0	5.1242	0	0	0	0	0	0	5.579	0	12.5492	5.9577	0	0	0	0	0	0	6.4224	0
159	lcl|c239497_g2_i3|m.25879	0	3.7203	0	3.3283	0	0	0	0	0	0	3.507	0	0	0	0	0	0	0	0	0	4.1496	3.6606	0	3.6894	0	3.8256	0	11.0779	3.5029	0	7.39	0	0	0
160	lcl|c239561_g1_i2|m.25969	4.4172	4.9302	10.2547	8.8214	5.0388	4.8386	4.6998	5.104	14.0166	10.0098	0	0	0	0	4.5443	8.7208	4.7682	0	5.471	5.3968	0	9.7021	4.7474	4.8893	10.6787	10.1394	9.5601	4.8935	4.642	5.1056	9.7933	5.0603	0	4.8142
161	lcl|c239587_g1_i1|m.26015	0	0	8.9562	1.9261	0	0	2.0523	0	0	0	4.059	2.1258	0	0	0	0	0	0	0	2.3567	0	0	0	0	2.3316	0	0	2.1369	0	0	0	0	2.3866	0
162	lcl|c239610_g1_i3|m.26053	31.7819	25.3375	15.8105	4.5335	10.3583	19.8935	19.3229	15.7386	4.8023	15.433	14.3308	5.0036	20.5427	0	4.6709	17.9275	0	15.9928	11.2467	16.6415	22.6088	14.9586	4.8797	5.0255	10.9762	41.6873	24.5661	30.1787	4.7713	10.4956	20.1321	20.8052	22.4696	34.6384
163	lcl|c239652_g2_i1|m.26096	48.6555	61.0935	77.6564	66.8022	83.2532	146.566	84.1233	112.441	70.7629	68.9109	95.9842	46.9183	55.036	0	31.2847	96.0592	85.3468	99.9751	60.2624	89.1687	113.571	33.3963	26.1464	60.5868	117.626	125.645	118.467	80.8519	83.0883	112.476	67.42	111.478	52.6736	72.9142
164	lcl|c239662_g2_i17|m.26116	0	17.8356	18.5489	0	0	0	17.0023	55.3938	0	0	0	0	0	0	49.3194	15.7744	17.2496	0	0	0	0	0	17.1746	35.3753	38.6319	18.3404	17.2926	0	16.7931	18.4703	0	0	0	0
165	lcl|c239670_g2_i1|m.26141	23.2023	6.4741	6.7331	11.5839	6.6168	6.3539	0	20.1074	18.4061	13.1446	0	6.3925	19.6837	0	11.935	5.7259	6.2614	20.4321	7.1843	14.1739	7.2211	12.7405	6.2342	6.4204	7.0115	6.6574	12.5541	19.2778	6.0957	6.7045	0	13.2901	7.1767	6.3219
166	lcl|c239673_g1_i3|m.26150	4.3466	2.4256	5.0453	2.1701	4.9582	4.7612	4.6246	2.5112	11.4936	0	6.8597	4.7901	4.9165	0	0	4.2906	4.6919	5.1035	10.7669	0	2.7055	4.7734	7.0072	2.4055	0	7.4829	0	4.8152	13.7032	5.0239	7.2274	4.9794	2.6889	2.3686
167	lcl|c212015_g2_i1|m.2602	0	0	0	6.1884	0	0	0	0	0	0	0	13.6601	0	0	0	0	0	0	0	0	0	0	0	0	7.4914	0	0	0	0	0	0	0	23.0036	6.7546
168	lcl|c239684_g3_i6|m.26167	17.1992	16.2431	18.4285	31.7054	18.1103	47.8242	11.2613	16.816	5.5975	4.4971	6.9599	2.9161	2.993	0	9.5276	10.448	17.1376	18.641	24.5794	30.7121	42.8228	24.7003	0	13.1796	6.3968	7.5922	10.0219	4.397	19.4647	12.2336	10.2662	1.5156	6.5476	2.8839
169	lcl|c239719_g1_i1|m.26241	3.3747	3.7665	3.9172	3.3697	3.8495	0	10.7716	19.4968	7.1389	0	0	3.719	3.8172	0	3.4718	3.3312	14.5711	3.9623	0	0	0	7.4122	7.2539	0	0	11.6194	0	7.477	7.0927	7.8011	3.7409	3.866	8.3505	3.678
170	lcl|c239813_g5_i1|m.26346	0	1.0887	1.1323	0.974	1.1127	1.0685	1.0378	0	0	1.1052	0	1.075	1.1034	0	0	0	0	0	2.4163	1.1918	0	0	0	0	1.1791	1.1195	0	1.0806	1.0251	1.1274	0	1.1175	0	1.0631
171	lcl|c239883_g8_i2|m.26469	5.8632	6.544	0	0	0	0	6.2383	6.7748	6.2016	0	0	6.4615	0	0	0	0	18.9869	13.7684	7.2618	0	0	6.439	0	0	14.1743	13.4584	6.3448	0	6.1615	0	0	6.7168	7.2541	0
172	lcl|c239887_g1_i1|m.26471	0	0	3.4843	8.992	6.8483	13.1524	6.3876	3.4685	6.3501	0	3.1582	23.1567	6.7908	0	9.2644	5.9263	0	3.5245	0	0	7.4738	13.1863	12.9047	9.9676	7.2568	10.3355	12.9933	13.3016	3.1545	13.8782	0	17.1939	0	3.2716
173	lcl|c239893_g3_i11|m.26489	0	17.8356	9.2745	0	4.5572	0	0	4.6162	0	4.5265	16.8129	8.8054	13.5567	0	4.11	7.8872	0	0	0	4.881	14.9201	4.3874	0	0	14.487	4.5851	8.6463	8.8514	0	4.6176	4.4286	0	14.8283	8.7081
174	lcl|c239893_g3_i11|m.26493	0	15.8194	0	14.1526	0	0	30.1606	81.8865	29.9833	32.1185	74.5617	31.24	96.1933	0	0	55.9649	45.8989	0	0	17.3168	0	31.1312	0	62.7527	102.794	0	15.3378	31.4033	14.8948	0	31.4236	32.4741	35.0721	77.2372
175	lcl|c239894_g3_i2|m.26508	0	34.1106	0	10.1722	0	66.9539	32.5169	0	10.7753	23.0852	0	11.2269	23.0463	0	0	0	0	179.42	100.939	0	0	11.1878	0	11.2759	36.9418	23.384	0	56.4279	10.7056	0	45.1714	46.6816	25.2081	66.617
176	lcl|c239908_g1_i5|m.26518	0	2.4354	0	0	0	0	2.3216	0	0	2.4723	0	0	2.4681	0	0	0	0	2.562	0	0	0	0	0	0	0	0	0	2.4173	0	0	0	0	0	0
177	lcl|c239962_g2_i3|m.26573	10.0926	0	17.5727	5.0388	5.7564	11.0553	0	11.6619	10.6752	5.7177	21.2374	0	11.4161	0	15.5746	4.9814	5.4472	11.8502	6.2501	0	18.8465	0	5.4235	0	18.2993	28.9585	10.9216	0	31.8185	17.4982	16.7819	23.124	24.974	16.4996
178	lcl|c212026_g3_i1|m.2608	131.961	218.198	121.972	131.765	200.706	120.457	156.003	110.123	118.9	207.663	125.984	188.517	113.331	9.1527	120.674	176.096	71.2224	154.941	90.8001	152.269	212.953	198.595	49.9015	202.864	180.186	98.1636	185.111	94.7514	97.5864	203.367	138.155	165.17	199.548	282.315
179	lcl|c239963_g4_i3|m.26575	3.5981	4.016	4.1766	3.5928	12.3134	7.8827	11.485	4.1576	3.8058	0	7.5714	7.9307	0	0	0	3.5519	0	8.4495	0	13.1883	4.4793	7.9031	0	3.9827	8.6986	0	3.8937	15.9443	3.7812	8.3177	3.9886	4.122	4.4518	7.8431
180	lcl|c240014_g2_i1|m.26649	1.8843	0	6.5618	1.8816	2.1495	6.1923	10.0245	2.1773	1.9931	2.135	5.9477	4.1533	6.3944	0	1.9386	3.7202	2.0341	6.6375	7.0016	6.9067	2.3458	4.1388	4.0504	4.1714	2.2777	6.488	4.0783	2.0875	5.9407	10.89	4.1777	4.3174	2.3314	4.1074
181	lcl|c240053_g2_i1|m.26700	22.1763	49.5029	90.0949	33.2152	37.9453	109.312	35.3925	64.0609	23.4564	87.9435	34.9983	61.0987	25.0844	0	34.2216	65.6731	59.8455	26.0382	96.1329	176.113	69.0184	60.8858	11.9171	98.1845	80.4175	38.1779	35.9969	73.7017	69.9142	64.0805	61.4577	38.1074	41.1561	48.3389
182	lcl|c240104_g7_i1|m.26774	0	6.4057	0	0	0	0	0	0	0	0	0	0	0	0	0	5.6655	0	0	0	0	14.2897	6.303	6.1683	0	0	6.587	0	0	6.0313	19.9011	0	6.5749	7.1009	0
183	lcl|c240121_g3_i1|m.26818	0	0	0	0	0	10.9536	0	0	0	0	10.521	0	0	0	0	19.7422	21.5884	0	0	0	24.8974	0	0	0	12.0873	34.4304	0	0	0	11.5581	11.085	22.9112	0	0
184	lcl|c240175_g3_i1|m.26871	0	0	16.3573	18.7613	10.7165	0	0	10.8553	9.9368	5.3222	0	10.3533	0	0	0	4.6369	0	5.5153	0	11.478	5.8477	5.1586	0	0	5.6779	0	5.0831	5.2037	9.8726	10.8586	10.4142	5.3812	0	0
185	lcl|c240175_g3_i1|m.26872	5.4514	0	0	5.4433	0	0	0	0	5.766	0	11.471	0	0	0	0	0	0	0	0	0	0	5.9868	0	0	0	0	0	0	11.4575	0	6.043	12.4901	0	0
186	lcl|c240190_g1_i1|m.26888	0	8.7463	0	0	26.8171	42.9192	8.3377	0	0	8.8789	8.2448	25.9082	0	0	0	38.6777	8.4589	27.603	0	9.5742	19.511	34.4239	0	17.3475	0	0	0	0	0	0	0	0	29.0863	0
187	lcl|c240251_g4_i1|m.26961	36.766	45.5947	47.4184	36.7115	46.5995	35.7983	39.1181	23.6014	56.1718	37.0288	51.5765	58.5261	55.4498	0	79.8505	60.4884	66.145	33.5756	35.4174	29.9464	81.369	49.3495	57.0764	45.2166	49.3792	70.3278	35.3653	45.2554	42.9298	33.0521	45.2846	37.4388	70.7595	66.784
188	lcl|c240254_g2_i3|m.26966	13.872	15.4828	8.051	48.48	23.736	22.7928	0	8.0144	14.6727	7.8588	0	7.6438	0	0	0	6.8468	0	0	0	0	0	0	0	0	0	0	0	0	0	0	0	0	8.5815	0
189	lcl|c212126_g1_i2|m.2626	60.3688	37.4327	54.5018	26.7908	7.6515	117.56	64.2309	54.254	92.2327	38.0003	21.1718	22.1766	22.7618	25.1227	0	19.8641	36.2028	55.1303	66.4622	65.5616	0	36.8322	36.0454	44.5467	32.4317	107.778	43.5518	44.585	84.5875	23.2589	52.0493	84.5263	24.8969	29.2421
190	lcl|c240260_g2_i7|m.26976	1.1343	0	0	0	0	0	0	0	1.1998	0	1.1934	0	0	0	1.1669	0	0	0	1.4049	0	1.4121	1.2457	2.4381	0	0	2.6036	1.2275	0	1.192	1.311	0	0	0	0
191	lcl|c240274_g5_i1|m.26994	16.3541	18.2531	31.6387	10.8866	37.3108	11.9427	17.4003	25.1958	28.8301	37.0598	11.471	18.0231	6.1662	0	22.4329	21.525	23.5379	25.6028	20.2554	19.981	20.3593	11.9735	5.8589	12.0678	32.947	37.5395	17.6975	30.1955	45.83	12.6018	30.215	74.9403	13.4893	35.6479
192	lcl|c240300_g3_i7|m.27053	42.4871	62.5091	44.8339	40.4958	59.4807	78.2716	20.5478	26.778	51.0676	54.7042	46.7336	46.823	28.3983	0	21.8548	41.9405	37.524	61.2238	52.6225	33.0333	40.8713	29.6927	45.6632	40.6145	65.363	64.2782	31.348	51.3467	81.18	37.9472	36.394	73.0091	31.0621	37.8865
193	lcl|c240300_g3_i7|m.27054	130.397	133.41	264.879	227.856	185.932	238.058	196.547	175.783	195.391	295.49	285.82	251.482	184.371	0	22.3581	235.985	70.3783	165.863	201.879	146.039	81.1656	226.739	70.0723	132.304	183.888	162.129	176.385	168.531	342.58	163.277	168.64	224.071	80.6659	248.704
194	lcl|c240327_g5_i1|m.27085	0	14.3246	14.8976	0	0	0	40.9662	74.1492	0	0	13.5033	14.1441	14.5174	0	0	12.6692	13.854	15.0694	15.896	0	0	14.0948	0	14.2058	0	14.7301	13.8886	42.6541	40.4622	0	28.4544	14.7029	0	13.9878
195	lcl|c240357_g2_i2|m.27113	0	0	3.44	0	6.7612	3.2463	3.1532	1.7122	3.1346	1.6789	9.3541	0	0	0	0	0	0	0	1.8353	3.6208	3.6893	0	3.1851	1.6401	1.7911	0	0	1.6415	1.5572	1.7127	6.5704	0	0	3.2299
196	lcl|c240403_g1_i1|m.27200	0	0	3.2287	0	3.1729	3.0468	0	0	0	0	11.7059	0	0	0	0	2.7457	0	3.2659	0	0	3.4627	3.0547	0	0	3.3622	0	0	0	2.923	0	3.0834	0	3.4414	0
197	lcl|c240440_g6_i6|m.27259	82.8792	65.0949	57.0092	55.171	87.5387	40.3489	32.6598	31.9219	74.676	59.1258	71.0512	91.3373	65.9706	0	88.422	63.6324	33.1348	25.2291	34.2168	75.007	80.2485	80.9059	89.0749	67.9526	63.077	116.259	43.1827	40.8066	51.6127	85.1511	78.263	119.561	53.1696	90.3282
198	lcl|c240453_g2_i2|m.27266	0	0	0	10.5685	12.0735	34.7813	11.2613	0	0	0	0	0	0	0	0	10.448	0	0	0	0	79.0574	0	0	0	0	0	11.4535	0	22.2454	24.4671	0	0	39.2853	0
199	lcl|c240476_g1_i3|m.27281	0	0	2.1873	5.6447	2.1495	6.1923	0	4.3547	3.9862	4.2701	11.8954	4.1533	6.3944	0	0	7.4404	2.0341	4.425	7.0016	4.6045	4.6917	4.1388	0	2.0857	2.2777	8.6507	4.0783	6.2625	3.9605	8.712	4.1777	8.6347	4.6628	0
200	lcl|c212208_g2_i4|m.2650	7.5113	0	0	15.0004	0	0	0	0	7.9449	0	0	0	0	0	0	7.4147	8.1081	0	0	0	0	8.249	0	0	18.1588	0	0	0	0	0	0	0	0	0
201	lcl|c240483_g2_i2|m.27308	7.2122	0	0	28.8061	0	23.7005	15.3472	16.6672	0	16.3435	22.7644	31.7929	16.316	0	0	7.1194	7.7852	76.2137	26.7981	26.435	8.9785	39.6027	0	23.9488	26.1535	33.1101	7.8046	47.9387	15.1584	25.0084	31.9797	41.3111	26.7696	39.3021
202	lcl|c240488_g1_i6|m.27324	6.2451	6.9702	7.249	3.1179	7.1238	3.4204	0	0	0	10.6139	3.2853	6.8824	0	11.6951	6.4248	6.1647	6.7412	3.6663	3.8674	3.815	3.8872	3.4292	10.0679	3.4562	0	7.1675	3.379	3.4592	3.2814	7.2183	6.9228	7.1543	3.8633	6.8063
203	lcl|c240532_g3_i2|m.27393	57.3929	25.623	39.9717	34.3847	26.1876	62.8675	36.6387	26.5266	12.1411	26.0115	48.3076	37.95	51.9354	0	82.6621	33.9928	49.5622	80.8652	14.2168	28.0484	71.4486	37.8178	24.6733	38.1156	55.4994	52.6963	0	63.5807	36.188	39.8021	50.8973	39.4492	42.6052	25.0205
204	lcl|c240624_g3_i1|m.27496	9.0053	0	0	8.992	0	0	9.5814	0	0	0	0	9.9243	0	0	0	8.8895	0	0	0	0	44.8429	0	19.357	9.9676	21.7705	10.3355	0	9.9762	0	10.4087	0	20.6327	0	0
205	lcl|c240628_g3_i3|m.27511	0	0	0	0	0	0	0	0	0	0	0	0	0	0	0	0	0	0	0	0	0	0	0	0	0	12.3684	0	8.9538	19.8187	0	0	12.3455	0	0
206	lcl|c240630_g1_i1|m.27515	6.1741	10.3365	7.1666	3.0825	3.5214	3.3815	6.5691	3.567	6.5305	3.4978	3.248	10.2063	10.4756	0	6.3517	9.142	3.3323	7.2493	0	3.7717	7.6861	3.3902	3.3178	3.4169	3.7315	7.0861	3.3406	3.4199	3.2441	3.5681	3.4221	3.5365	3.8194	6.729
207	lcl|c240640_g2_i1|m.27531	113.388	142.375	131.617	141.526	177.848	163.018	339.307	425.81	164.908	112.415	74.5617	140.58	136.274	0	145.814	125.921	114.747	116.493	140.438	181.827	158.802	186.787	83.7821	101.973	111.361	89.4691	199.391	157.017	119.158	122.868	54.9912	73.0668	245.505	185.369
208	lcl|c240688_g3_i1|m.27609	95.8799	121.282	107.584	79.7816	145.829	98.024	78.2106	88.6301	131.839	115.879	94.1524	112.709	112.068	119.703	131.518	107.266	106.947	86.3091	98.9603	117.143	206.893	129.866	144.266	109.663	108.169	271.438	141.799	141.623	100.759	118.21	88.5713	142.791	102.809	97.5308
209	lcl|c240709_g1_i1|m.27629	8.8585	23.0699	13.7101	23.5876	10.105	9.7035	18.8504	10.2358	18.7396	26.7654	24.8539	22.7792	30.0604	0	12.1512	29.1484	15.9371	20.8023	29.2578	3.6077	18.3799	19.457	9.5207	6.5367	35.6925	20.3339	9.5861	9.8135	12.4123	23.8909	19.6397	30.4445	18.2667	19.3093
210	lcl|c240739_g2_i5|m.27680	6.367	0	0	6.3576	0	6.9744	6.7744	7.357	6.7345	7.2141	6.6989	7.0168	0	0	0	6.2851	13.7458	7.4758	7.8859	15.5581	0	0	0	0	7.6962	7.3075	0	21.1604	6.691	0	0	7.294	7.8775	6.9393
211	lcl|c212237_g2_i1|m.2659	27.6785	13.73	14.2792	39.9209	42.0978	37.0563	16.3607	49.7499	13.0116	17.4228	38.8283	20.3355	17.3934	0	15.8194	33.3942	46.4762	28.8877	30.4723	18.7871	11.4857	30.397	16.5265	27.2323	33.4567	49.4152	26.6241	34.0696	67.8695	14.2186	17.0458	56.3702	15.22	30.1662
212	lcl|c240749_g2_i2|m.27696	0	0	0	0	3.3991	0	0	3.4431	3.1518	3.3763	0	3.2839	3.3706	0	0	0	0	6.9975	0	0	0	3.2725	0	0	0	6.8399	3.2246	3.3011	0	3.4442	0	0	0	0
213	lcl|c240761_g2_i10|m.27710	50.8267	0	36.6192	19.2505	9.9964	28.7974	1.8648	14.176	27.8071	1.9858	9.22	11.589	19.8248	6.5643	21.6369	1.7301	7.5676	14.405	15.1952	12.848	2.1819	13.4734	101.718	9.6997	12.7111	42.242	3.7932	34.9489	149.188	0	40.8	22.0859	2.1684	26.7423
214	lcl|c240794_g1_i2|m.27749	0	3.1916	9.9579	0	3.262	0	6.085	0	0	3.24	21.0604	18.9084	12.9383	0	0	5.6456	3.0868	6.7151	17.7087	13.975	28.4792	6.2809	9.22	6.3303	6.9131	32.8196	6.1889	34.8467	0	3.3052	15.8496	22.9313	0	15.5829
215	lcl|c240794_g1_i3|m.27750	0	3.2486	0	0	3.3202	0	6.1937	0	0	3.2979	0	19.2461	13.1693	0	0	5.7464	3.1419	6.835	18.0249	14.2245	28.9877	6.393	9.3847	0	7.0365	10.0217	6.2995	0	0	3.3642	0	23.3408	43.2139	15.8612
216	lcl|c240833_g3_i3|m.27779	32.3833	6.0239	18.7946	21.5569	0	0	34.455	24.9456	17.1262	24.4611	34.0712	29.7401	30.5249	0	94.3928	26.6389	52.4342	0	6.6847	6.5942	47.033	23.7092	17.4021	29.8699	26.0957	99.1109	23.3622	53.812	28.3592	24.9532	5.983	55.6469	33.3882	29.4115
217	lcl|c240857_g5_i1|m.27819	140.044	125.913	176.104	120.415	97.6255	161.925	111.753	161.819	111.096	193.937	81.8577	77.1681	39.6023	0	76.039	153.603	62.9877	164.432	168.634	133.079	121.07	119.621	96.1612	111.951	141.066	151.8	126.29	181	171.699	98.9196	146.618	120.325	115.512	139.912
218	lcl|c240877_g2_i2|m.27858	37.906	52.8846	43.9998	18.9249	21.62	51.9023	30.2483	10.9499	40.094	10.7373	19.9409	20.8872	21.4384	0	0	9.3546	30.6882	11.1268	46.9486	23.1562	0	20.8144	20.3698	31.4676	11.4548	21.7525	20.5098	10.4982	29.8761	32.8599	21.0099	32.5685	35.1741	20.6564
219	lcl|c240904_g2_i1|m.27923	7.8363	17.4926	27.2884	15.6495	8.939	34.3353	16.6753	9.0548	0	0	8.2448	8.6361	8.864	0	0	15.4711	0	9.201	29.1172	28.7226	29.2664	34.4239	8.4221	0	28.4168	0	0	0	41.1754	18.1151	0	0	0	0
220	lcl|c240989_g2_i1|m.28022	48.2951	2.6952	0	26.5229	5.5091	0	2.5692	11.1608	112.382	2.736	5.0812	7.9836	81.9425	0	62.1059	11.9185	75.5915	8.5058	8.9724	2.9503	15.0307	5.3038	147.93	0	5.8377	163.515	2.6131	2.6751	0	11.1643	5.3536	11.0653	23.901	13.1589
221	lcl|c241031_g1_i1|m.28098	4.0575	11.6451	6.0555	3.4727	31.0768	23.4926	8.0174	6.6977	9.8096	24.3002	40.8604	14.0536	13.1131	30.3939	5.9632	40.6253	30.0334	23.8205	18.6659	9.9147	31.0288	10.1852	6.2298	9.6238	21.0195	5.9874	11.2906	21.8327	6.7005	38.1885	16.7063	19.921	20.0804	34.7457
222	lcl|c176630_g1_i1|m.578	0	0	10.0906	0	0	0	0	0	0	0	4.5731	0	4.9165	0	0	8.5813	0	0	5.3834	0	5.411	0	0	0	0	9.9772	0	0	0	0	0	0	0	4.7372
223	lcl|c212248_g3_i1|m.2663	0	0	0	3.9313	0	0	0	0	8.3287	0	4.1423	0	0	0	0	0	0	0	0	0	4.9013	0	0	0	0	0	0	0	0	0	0	0	0	0
224	lcl|c241047_g4_i1|m.28118	0	0	0	0	0	0	0	0	0	8.8364	0	8.5947	0	0	0	0	0	0	0	0	0	8.5648	16.7637	0	0	17.9016	0	0	0	0	0	0	0	0
225	lcl|c241090_g1_i1|m.28152	11.5327	21.4532	17.849	3.8385	4.3852	0	4.0902	8.8839	16.2645	17.4228	4.0446	12.7097	0	0	0	15.1792	4.1497	13.5411	4.7613	14.0903	9.5714	16.8872	16.5265	12.7651	27.8806	44.1207	24.9601	34.0696	16.1594	4.4433	8.5229	35.2314	0	12.5693
226	lcl|c241114_g1_i2|m.28195	3.8533	4.3008	0	3.8476	13.1867	4.2209	4.0998	0	8.1515	8.732	8.1084	0	8.7173	0	3.9642	15.215	4.1595	4.5244	0	14.1237	4.797	8.4636	4.1414	0	9.3155	13.2675	12.5095	17.0751	4.0494	4.4538	4.2715	8.8287	9.535	16.7986
227	lcl|c241148_g1_i6|m.28240	13.6589	25.4082	5.2849	27.2773	15.5809	19.949	24.2211	10.5217	24.0788	25.7935	23.9514	25.088	15.45	0	9.3679	8.9888	24.5734	5.3458	22.5563	16.688	11.336	20.0005	9.7866	10.079	27.5172	20.9019	0	10.0877	14.3539	36.8374	20.1883	36.5107	16.8993	14.8865
228	lcl|c241192_g1_i4|m.28299	0	0	0	0	0	0	0	0	0	0	0	0	0	0	0	0	0	0	0	0	30.9792	0	13.3726	0	0	14.2803	0	0	0	0	0	14.2539	0	0
229	lcl|c241194_g4_i1|m.28300	0	1.9312	4.017	1.7278	1.9738	3.7907	0	1.9994	0	1.9605	1.8205	1.9069	0	0	1.7801	3.4161	0	0	4.2862	2.114	0	0	1.8597	1.9152	0	1.9859	0	1.9169	3.6367	2	1.9181	0	0	1.8858
230	lcl|c241197_g1_i1|m.28305	0	0	0	0	4.1877	0	0	0	0	0	0	0	0	0	0	0	0	0	0	0	0	0	0	4.0634	0	4.2133	0	0	0	0	4.0695	4.2055	0	4.001
231	lcl|c241220_g4_i2|m.28322	0	1.3962	0	2.4981	1.427	0	1.331	0	1.3231	1.4174	0	0	0	0	1.2869	1.2348	0	0	1.5493	0	0	0	0	1.3846	0	1.4357	0	0	0	0	2.7734	0	0	0
232	lcl|c241222_g2_i5|m.28326	7.2282	8.0675	4.1951	10.8262	12.368	11.8765	30.7625	25.0562	15.2908	4.0949	7.605	11.9488	4.088	0	0	3.5676	7.8025	12.7304	0	13.2468	0	3.9691	0	8.0006	13.1057	12.4438	11.7329	16.015	3.798	8.3546	8.0127	0	4.4715	7.8778
233	lcl|c241251_g1_i1|m.28362	83.2825	53.1162	55.2407	83.1592	122.145	91.2268	88.6105	123.726	75.5055	107.843	87.6236	78.6701	94.2039	44.5608	61.1993	93.9557	51.371	69.8471	88.4142	101.752	59.245	65.33	76.7215	52.6756	43.1437	40.9646	77.2487	105.442	75.0174	55.0064	105.51	40.889	44.1601	51.8673
234	lcl|c212462_g1_i1|m.2727	5.9705	3.3319	0	2.9809	0	0	0	0	3.1576	3.3824	0	3.2899	0	0	0	0	0	0	3.6974	0	0	0	3.2084	0	0	0	0	0	9.4115	3.4505	3.3093	3.4199	0	0
235	lcl|c241269_g1_i2|m.28376	9.4217	0	0	0	0	0	0	0	9.9656	0	9.9128	10.3832	0	0	9.6928	0	0	11.0625	0	0	11.7291	0	10.126	0	11.3886	10.8134	10.1956	10.4375	9.9011	0	0	0	0	10.2685
236	lcl|c241286_g1_i3|m.28381	0	0	0.674	0	0.6624	0	1.2356	0	0	0.6579	0	0	0	0	0.5974	0	0	0	0	0	0.7229	0	0	0	0	0	0	0	0	0	0.6437	0	0.7184	0
237	lcl|c241299_g1_i6|m.28386	42.6531	17.0021	42.4372	36.5057	52.1305	36.7099	32.4156	14.0814	51.5601	44.8758	41.6709	40.2909	51.6927	0	62.6864	42.1044	59.1967	17.8861	30.1875	40.9454	53.099	43.4964	72.0369	20.2334	29.4614	76.9267	26.3753	40.5015	35.2185	31.6929	40.5276	52.3532	37.6943	46.4867
238	lcl|c241317_g4_i3|m.28425	0	0	0	3.4336	0	0	3.6587	0	0	0	0	0	0	0	3.5377	0	0	0	0	0	0	0	0	0	0	0	3.7212	0	3.6137	3.9746	3.8119	3.9394	0	0
239	lcl|c241317_g4_i4|m.28427	25.6686	42.9739	14.8976	25.6306	14.6403	42.1757	54.6215	59.3193	27.1503	14.5418	27.0066	28.2882	43.5521	0	26.4073	25.3384	27.708	15.0694	31.792	15.6806	15.9775	28.1896	13.7938	28.4117	0	14.7301	13.8886	42.6541	0	14.8344	14.2272	14.7029	31.7582	13.9878
240	lcl|c241349_g1_i1|m.28471	4.3757	2.4419	2.5396	0	9.9829	4.7931	0	5.0561	4.6283	2.4789	6.9057	0	4.9495	0	4.5016	6.4792	0	2.5689	2.7098	2.6731	5.4474	0	2.3514	2.4217	0	0	2.3676	0	4.5984	5.0576	0	7.5192	0	4.769
241	lcl|c241359_g3_i12|m.28482	4.3007	4.8001	4.9921	4.2943	4.9059	0	0	0	4.5489	0	0	0	4.8647	0	8.8489	0	4.6424	5.0496	5.3266	5.2544	0	0	0	4.7603	10.397	9.8719	0	4.7644	0	0	4.7674	4.9268	5.321	4.6872
242	lcl|c241389_g1_i2|m.28515	27.6264	10.2781	21.3784	9.1952	31.5139	30.2617	68.5855	63.8437	0	10.434	0	30.4458	10.4164	0	37.8952	0	0	21.625	0	0	11.4641	20.2265	29.6916	0	11.1312	0	9.9652	30.6049	48.3869	0	20.4164	0	22.787	20.0729
243	lcl|c241398_g1_i1|m.28521	0	0	0.8837	0	0	0.8339	0	0	0	0	0	0	0	0	0	0	0	0	0.9429	0	0	0	0	0	0.9202	0	1.6477	0.8434	0.8	0	0	0.8721	0	0
244	lcl|c241409_g1_i4|m.28539	67.9149	28.4255	59.1248	33.9072	67.7878	55.7949	36.1299	19.6186	8.9794	57.7129	44.6593	28.0672	19.2053	0	26.2009	25.1405	36.6554	49.8388	21.0291	31.1162	42.2738	55.9388	18.248	56.3794	10.2616	38.9733	45.9335	37.6186	151.663	58.874	56.4642	68.0773	21.0067	46.2618
245	lcl|c212602_g3_i5|m.2781	0	6.7007	6.9687	20.9812	10.2725	3.2881	15.969	38.1534	44.4504	71.4237	60.0063	16.5405	3.3954	0	6.1763	35.5578	12.961	7.049	7.4357	25.6723	33.6322	16.4829	6.4523	0	0	0	9.745	3.3254	9.4635	13.8782	13.3102	68.7758	25.9973	22.9009
246	lcl|c241444_g1_i2|m.28576	2.1646	7.2479	0	2.1614	7.4077	2.3711	4.6062	2.5012	6.8687	9.8104	6.8323	4.7711	2.4485	0	2.2269	4.2735	4.6732	2.5416	8.043	5.2893	5.3895	2.3772	4.6529	2.3959	5.233	12.4218	2.3424	4.796	15.9234	12.5097	11.9977	4.9595	8.0344	4.7183
247	lcl|c241466_g2_i10|m.28615	82.8792	138.755	208.44	131.031	362.41	234.528	132.272	79.8046	160.716	156.51	159.865	60.8916	109.372	0	71.0534	102.266	59.6426	145.969	188.192	244.71	163.363	250.303	7.4229	38.2233	100.181	126.828	104.635	145.374	101.613	167.641	122.499	126.594	85.4511	90.3282
248	lcl|c241498_g6_i2|m.28662	45.0383	55.0556	69.705	51.3961	75.8407	103.368	41.074	56.9973	34.0271	60.7504	54.1553	37.8169	33.963	0	28.6831	48.6932	46.3015	73.0269	92.9706	55.0265	53.3984	44.7511	36.8801	80.7116	49.2557	76.3056	58.0213	73.6532	96.914	47.0992	87.9653	51.5954	34.4953	49.0862
249	lcl|c241500_g1_i1|m.28663	1.609	0	1.8677	3.2133	1.8355	1.7625	6.8479	0	0	0	0	5.3197	1.82	0	3.3107	1.5883	1.7369	1.8892	0	0	2.0031	1.7671	1.7293	0	1.9449	3.6934	1.7412	3.565	0	0	1.7837	7.3732	1.9908	1.7537
250	lcl|c241502_g2_i1|m.28666	3.8716	4.3212	0	0	0	4.2409	16.4773	13.4208	4.0951	8.7735	12.2203	4.2667	4.3793	0	11.9491	3.8218	0	9.0917	19.1809	4.7302	4.8198	4.2519	4.1611	8.5707	18.7195	8.887	8.3793	0	8.1373	0	8.5836	0	4.7901	0
251	lcl|c241516_g1_i3|m.28672	0	0	21.8727	9.4078	10.7475	10.3205	0	0	0	0	9.9128	0	0	0	0	9.3005	0	44.2499	0	0	0	0	0	10.4286	0	21.6268	10.1956	31.3126	9.9011	0	10.4442	10.7934	0	10.2685
252	lcl|c241524_g4_i1|m.28674	0	0	1.2784	0	0	0	0	0	0	0	1.1587	0	0	0	0	0	0	0	1.364	0	0	0	0	0	0	0	0	0	1.1574	0	0	0	0	0
253	lcl|c241579_g2_i1|m.28728	0	25.8047	0	23.0857	13.1867	12.6627	86.0967	66.7869	12.2272	13.098	0	0	0	0	11.8926	11.4113	24.9568	0	14.3177	0	57.5643	25.3907	37.2725	0	0	0	12.5095	0	0	13.3615	0	13.243	85.8148	0
254	lcl|c241579_g2_i3|m.28729	29.3686	81.9473	59.6574	51.319	67.0026	104.553	70.3068	50.9024	23.2979	49.9139	38.6243	40.4572	8.305	0	60.4274	79.7248	23.7764	25.8623	54.5619	62.793	54.8416	56.4428	31.5641	81.2676	70.9992	50.56	71.5073	73.2037	46.2945	42.4317	48.8339	67.2887	27.252	48.0123
255	lcl|c241608_g1_i1|m.28761	0	0	3.1905	0	0	0	2.9245	0	2.9073	3.1144	2.8919	3.0292	0	0	2.8278	2.7133	2.967	3.2273	0	0	0	0	0	3.0424	0	0	0	0	0	3.177	6.0939	0	0	2.9957
256	lcl|c212652_g1_i3|m.2790	4.7799	0	5.5484	4.7729	16.3577	5.2359	0	0	5.0558	5.4159	10.0582	10.5355	0	0	0	4.7184	5.1597	0	5.9202	0	11.9011	5.2494	15.4118	0	17.3334	10.972	15.5177	15.8858	0	5.5248	0	5.4758	11.8278	15.6286
257	lcl|c241608_g2_i1|m.28762	0	0	0	0	0	0	0	0	0	0	12.1196	0	0	0	5.9253	5.6855	12.4343	0	0	0	7.1701	12.6505	0	0	6.9619	13.2206	0	0	0	0	0	6.5981	0	6.2772
258	lcl|c241630_g2_i5|m.28790	3.2862	3.6678	3.8145	0	3.7486	3.5997	0	0	0	3.7234	0	0	3.7171	0	0	0	3.5473	3.8585	4.0701	4.015	0	0	0	3.6374	7.9445	0	0	3.6405	3.4534	0	3.6429	0	0	3.5816
259	lcl|c241649_g4_i1|m.28823	14.7641	0	10.2826	11.7938	6.7367	6.469	6.2835	6.8239	15.6163	10.037	15.5337	9.7625	10.0201	0	18.2267	14.5742	15.9371	3.467	10.9717	3.6077	14.7039	9.7285	9.5207	6.5367	21.4155	27.1119	6.3907	6.5424	9.3092	17.0649	19.6397	16.9136	3.6533	16.0911
260	lcl|c241650_g2_i3|m.28825	0	4.1678	0	0	0	4.0904	3.973	4.3148	0	4.231	1.9644	2.0576	2.1119	0	0	1.8431	2.0154	6.5767	9.2499	4.5623	0	0	0	0	2.2568	0	0	2.0684	3.9242	2.158	4.1394	2.1389	0	0
261	lcl|c241650_g2_i3|m.28826	77.7405	69.4142	75.1984	93.1504	88.6799	122.057	151.642	116.776	95.9324	93.9555	84.519	97.0973	99.6598	0	109.302	97.2046	100.7	73.0229	80.2381	110.811	135.491	108.142	125.328	108.994	106.499	107.068	120.581	83.2513	98.0355	86.8602	100.54	139.525	125.038	104.497
262	lcl|c241754_g2_i1|m.28913	3.4754	7.7579	5.3788	4.627	10.5718	5.0759	9.8606	4.0158	3.676	6.5629	4.8754	6.3834	6.5519	0	5.959	12.5792	7.503	12.2419	7.1741	4.2461	12.9796	6.3612	8.7155	10.2581	14.003	9.3071	5.0145	3.8501	1.2174	9.373	6.4209	14.5984	10.0331	5.0503
263	lcl|c241824_g2_i8|m.28976	0	4.4809	0	4.0087	0	0	4.2715	0	0	0	0	4.4244	0	0	0	7.9261	4.3336	0	0	0	4.9979	4.409	4.3148	0	4.8528	9.2154	0	0	0	4.6403	0	9.1983	0	0
264	lcl|c241824_g2_i8|m.28977	12.6845	0	0	0	0	6.9472	0	0	0	0	13.3457	6.9895	14.3479	0	6.5247	6.2607	0	0	0	0	0	6.9651	0	0	0	14.5581	0	0	0	14.6612	0	7.2656	0	0
265	lcl|c241854_g3_i2|m.29002	0	2.3906	2.4862	0.5347	0	0	1.7092	0	0.5664	1.8201	0	1.7703	1.8171	2.0055	0	1.0572	1.734	0	0	1.9626	1.3332	1.7642	0.5755	0	1.9417	0	1.1589	1.1864	0	1.2378	1.7807	0	2.65	1.7508
266	lcl|c241873_g2_i3|m.29039	41.2648	38.3804	31.9324	20.6018	47.0714	15.067	7.3174	7.9468	7.2744	7.7925	0	7.5793	7.7793	0	7.0754	20.367	0	0	0	0	34.2471	22.6588	51.7411	60.8993	16.6264	31.5733	22.3272	0	50.5919	31.7969	30.4954	31.515	8.5091	7.4956
267	lcl|c212693_g1_i1|m.2804	0	0	0	0	0	0	0	0	0	5.7	0	0	0	0	0	4.966	0	5.9068	0	0	0	0	0	0	6.081	0	0	11.1462	0	0	0	23.0526	6.2242	0
268	lcl|c241909_g1_i6|m.29130	0	0	14.0148	0	0	0	0	0	0	13.6801	0	26.6119	13.6571	0	12.4212	11.9185	0	0	0	29.5027	0	13.2596	12.9763	0	0	0	0	13.3755	12.6881	0	13.3841	13.8316	0	0
269	lcl|c241909_g2_i2|m.29132	0	0	11.5365	9.924	11.3373	10.8868	0	0	21.0249	0	0	21.9061	11.2421	0	10.2248	0	10.7284	23.3391	0	24.2858	0	10.9149	0	33.0026	24.0272	34.2205	10.7552	11.0103	0	0	11.0174	22.7715	0	10.832
270	lcl|c241909_g2_i3|m.29133	17.1575	57.4494	9.9579	0	48.9295	18.7941	18.2551	19.8251	18.1478	0	0	28.3626	19.4074	0	8.8256	8.4684	9.2603	30.218	0	10.4812	21.3594	9.4213	9.22	18.991	0	0	0	19.0073	36.061	9.9156	9.5098	9.8277	0	9.3498
271	lcl|c241916_g1_i1|m.29146	34.4357	0	19.9858	28.6539	26.1876	6.2868	0	0	36.4234	32.5143	30.1922	37.95	12.9838	0	47.2355	50.9892	55.7574	13.4775	14.2168	35.0605	78.5935	31.5148	30.8417	19.0578	13.8748	46.1093	18.6322	6.3581	36.188	46.4358	19.0865	13.1497	42.6052	12.5102
272	lcl|c241966_g1_i1|m.29199	0	7.1623	0	0	7.3202	7.0293	13.6554	7.4149	6.7876	7.2709	0	0	7.2587	0	6.6018	0	0	15.0694	23.844	7.8403	23.9662	7.0474	0	7.1029	0	7.365	0	0	6.7437	0	7.1136	0	23.8187	6.9939
273	lcl|c241966_g1_i2|m.29201	0	0	2.6498	2.2795	0	0	2.4289	0	0	0	2.4018	2.5158	0	0	0	2.2535	2.4642	2.6804	0	0	5.6839	2.5071	0	0	2.7594	5.2401	0	0	0	2.6386	0	2.6152	0	0
274	lcl|c242001_g1_i2|m.29236	3.7458	1.7918	7.4537	5.8775	5.4937	6.4477	1.1387	2.4733	2.264	4.2442	3.941	5.3075	2.4211	0	0.5505	4.2258	0.5776	3.7698	5.9649	4.5765	3.997	6.4644	1.7254	4.7384	5.8214	15.3539	4.6326	8.2993	11.8092	6.8036	16.0161	9.1953	0.6621	4.6657
275	lcl|c242066_g1_i1|m.29327	25.0213	7.9791	33.1928	32.1226	32.6197	19.5772	19.0157	12.3907	26.4656	28.3502	37.6079	39.3926	28.3025	0	11.032	24.6994	19.2923	20.9848	17.7087	21.8359	17.7995	19.6277	3.8417	7.9129	43.2068	24.6147	11.6043	23.7591	18.7818	24.7891	35.6616	20.4744	17.6899	38.9573
276	lcl|c242066_g1_i1|m.29328	0	0	0	8.7268	0	0	4.6494	0	4.6221	0	0	0	0	0	8.9912	0	0	5.1309	0	5.339	0	0	0	4.8368	0	0	0	4.841	0	5.0509	0	0	0	0
277	lcl|c242074_g1_i4|m.29345	0	0	1.1222	0	0	0	0	0	0	0	0	1.0654	1.0935	0	0	0	0	0	0	0	0	0	1.039	0	0	0	0	0	1.016	0	1.0717	1.1075	1.1961	1.0537
278	lcl|c212713_g4_i1|m.2814	0	0	0	0	0	0	0	0	19.9311	21.3504	19.8256	0	0	0	0	0	0	11.0625	0	0	0	0	0	0	0	21.6268	61.1739	20.875	0	0	0	0	34.9708	0
279	lcl|c242089_g1_i1|m.29373	34.0588	48.8748	39.5342	87.4501	49.9519	58.6263	72.4755	16.8662	41.1712	33.0772	25.5958	64.3451	5.5036	0	55.0611	52.8325	42.0169	28.5643	36.1574	47.5567	54.5142	53.4341	31.3756	53.8549	70.5753	55.8423	26.3261	26.9506	46.0181	67.4854	43.1488	66.887	42.1389	58.3313
280	lcl|c242092_g2_i3|m.29375	5.0463	11.2646	0	5.0388	5.7564	0	0	0	0	17.1531	10.6187	5.5613	0	0	5.1915	4.9814	0	11.8502	12.5002	0	18.8465	5.5419	0	0	12.1996	0	0	0	0	0	11.188	0	6.2435	5.4999
281	lcl|c242139_g4_i2|m.29446	34.533	53.9602	80.1692	41.3782	47.2709	68.0887	22.0453	23.9414	29.2211	78.2548	43.5996	30.4458	7.8123	0	42.632	47.7243	22.366	56.7655	8.5542	25.3148	34.3922	83.4342	7.4229	22.934	58.439	55.4874	74.7392	99.466	50.8063	39.9146	30.6247	63.297	34.1805	30.1094
282	lcl|c242185_g2_i2|m.29491	0	1.2529	1.303	0	1.2805	2.4593	7.1663	0	1.1874	3.8157	5.9054	4.9485	0	0	0	3.3244	0	2.6361	6.9518	2.743	1.3975	4.9312	1.2065	2.485	2.7138	2.5767	0	3.7308	3.539	12.975	7.4663	5.144	0	3.6704
283	lcl|c242193_g2_i1|m.29501	97.1219	110.756	122.538	80.1123	89.1125	117.95	69.6389	78.0679	80.3957	119.612	95.5201	83.7653	74.0348	0	45.6141	91.7042	56.9772	151.221	149.056	123.82	78.8526	120.573	56.7295	70.1091	107.189	77.5427	68.5432	116.949	99.8451	68.3304	72.5551	89.4932	67.9182	94.3454
284	lcl|c242257_g2_i2|m.29551	1.505	3.3596	8.735	1.5028	1.7168	3.2972	3.2026	5.2171	4.7757	1.7053	6.334	3.3173	5.1072	0	3.0967	2.9714	3.2492	1.7671	3.7281	3.6776	3.7473	4.9586	1.6175	1.6659	1.8192	3.4547	1.6287	3.3346	6.3265	5.2187	1.6684	8.6208	3.7242	3.2806
285	lcl|c242277_g7_i2|m.29564	0	8.0855	0	21.7006	33.0546	15.8706	23.1231	8.3706	0	8.2081	0	7.9836	8.1942	0	0	14.3021	0	17.0116	0	17.7016	9.0184	15.9115	7.7858	32.0736	26.2697	0	7.8393	32.1012	0	8.3732	24.0914	24.8968	35.8515	0
286	lcl|c242311_g2_i1|m.29646	1.9153	0	2.2233	0	0	2.098	0	0	0	0	0	0	0	0	0	1.8907	0	0	0	0	0	0	0	0	2.3152	0	0	0	0	0	0	0	0	2.0875
287	lcl|c242362_g2_i1|m.29700	13.494	5.0203	9.1369	15.7196	15.3928	10.47	6.5804	9.0954	14.2729	6.3705	10.0564	11.7729	10.1757	0	4.6274	7.7702	7.283	7.9219	6.2674	8.9302	12.599	11.7319	11.4813	6.8457	8.1555	9.6795	6.6928	7.4744	17.7257	12.9974	9.349	17.3909	7.652	6.7406
288	lcl|c212727_g5_i1|m.2822	372.325	406.325	585.845	2668.51	311.46	552.851	607.422	535.38	822.639	440.61	1166.49	382.968	580.253	0	59.5839	424.708	392.975	233.155	307.43	333.591	329.606	218.076	195.633	421.271	190.022	161.433	331.281	210.817	252.153	525.981	238.468	142.177	378.761	225.438
289	lcl|c242373_g3_i2|m.29725	43.8835	153.935	72.7689	93.8968	157.327	82.4048	93.3818	130.388	139.25	127.856	92.3418	89.815	92.1853	0	64.4946	111.392	40.6029	110.412	116.469	122.55	124.87	89.5021	80.8526	173.475	98.5114	64.7556	135.68	125.009	111.997	115.936	90.3428	93.3631	108.589	75.1577
290	lcl|c242381_g1_i1|m.29746	2.8496	0	3.3077	5.6907	0	0	12.1275	0	3.0141	3.2287	2.9981	0	0	0	0	0	0	3.3458	0	3.4815	14.1898	0	0	0	0	0	0	3.1568	2.9946	0	0	9.7933	3.5256	0
291	lcl|c242419_g1_i1|m.29781	0	5.3194	0	0	0	0	35.496	0	5.0411	0	5.0144	0	5.391	0	9.8062	4.7047	10.2892	11.1919	17.7087	0	0	0	0	0	0	21.8797	20.6298	5.2798	45.0763	27.5434	26.416	0	0	5.1943
292	lcl|c242463_g1_i3|m.29817	0	17.6624	0	0	0	0	0	0	0	0	0	0	0	0	8.1401	7.8106	8.5411	0	0	0	0	8.6895	0	0	0	0	0	0	0	36.5819	8.7711	0	0	0
293	lcl|c242499_g1_i3|m.29884	0	16.3895	0	14.6626	16.7506	32.1701	0	0	0	0	0	0	0	0	15.1069	28.9908	0	0	0	17.9409	18.2805	16.1265	0	0	17.7498	0	0	0	0	0	0	0	18.168	0
294	lcl|c242511_g4_i7|m.29892	0	0	0	0	0	0	0	0	0	0	2.4291	0	2.6115	0	2.3752	2.279	2.4921	0	0	0	0	0	0	0	2.7907	0	0	0	0	2.6685	0	0	2.8564	0
295	lcl|c242527_g2_i1|m.29909	83.8949	93.6368	132.161	95.7379	109.372	131.282	108.39	200.803	114.091	122.216	119.792	52.8324	67.7833	0	73.9791	94.6465	58.2173	56.2885	96.4863	117.143	96.981	111.878	57.9642	92.8602	123.139	116.92	142.664	152.687	125.948	117.748	73.0714	109.839	81.5556	78.373
296	lcl|c242541_g2_i5|m.29922	27.6264	46.2516	48.1015	13.7927	31.5139	30.2617	58.7876	79.8046	29.2211	31.3019	14.5332	30.4458	31.2492	0	0	13.6355	0	32.4375	17.1084	33.7531	0	15.1699	14.8458	61.1573	33.3937	31.7071	74.7392	30.6049	29.0322	15.9658	30.6247	0	0	30.1094
297	lcl|c242561_g4_i1|m.29954	0	0	0	3.1239	0	0	6.6573	3.615	0	0	0	10.3434	0	0	0	0	0	3.6733	3.8748	0	0	0	0	0	0	28.725	0	0	9.8631	3.6161	3.4681	0	3.8707	0
298	lcl|c242581_g1_i1|m.29984	2.7958	0	0	5.5833	6.3785	6.125	2.9747	3.2305	0	0	0	3.0811	0	0	2.8763	0	0	0	0	0	0	0	9.0144	0	3.3795	0	0	3.0972	11.7523	0	0	3.2029	6.9182	3.0471
299	lcl|c212802_g1_i2|m.2844	0	0	0	0	2.2565	2.1668	0	0	0	0	0	0	0	0	0	0	2.1353	0	0	0	0	0	0	0	0	0	0	2.1914	0	2.2864	0	2.2661	0	0
300	lcl|c242594_g2_i1|m.30002	0	2.3565	2.4508	0	2.4084	2.3127	4.4928	2.4396	2.2332	4.7845	2.2214	2.3268	0	0	2.1721	0	0	4.9581	0	0	0	2.3187	0	4.6739	0	4.8464	6.8543	2.339	0	0	2.3405	0	2.6122	4.6022
301	lcl|c242618_g2_i3|m.30039	8.6241	12.8341	10.0105	2.8704	0	3.1489	0	0	0	6.5143	3.0245	0	3.2517	0	0	0	6.2062	0	3.5605	0	0	3.157	0	0	3.4748	3.2993	3.1108	3.1846	0	3.3227	0	0	3.5567	3.1331
302	lcl|c242618_g2_i5|m.30041	0	0	3.5564	0	10.4849	3.3561	0	0	0	3.4715	3.2235	0	0	0	0	0	0	0	3.7947	0	0	3.3647	0	0	11.1103	0	0	3.3942	0	0	0	0	0	0
303	lcl|c242644_g1_i1|m.30082	0	10.7224	14.8683	15.9877	3.6529	10.5232	3.4071	3.7002	10.1613	10.8849	10.1076	3.5291	7.2444	0	6.5888	9.4832	6.9134	15.0398	7.9324	11.7373	7.973	10.5503	3.4417	14.1779	11.6123	11.0258	6.9306	10.6426	16.8261	11.1039	14.1993	14.674	7.924	10.4703
304	lcl|c242717_g1_i3|m.30173	9.6733	43.1865	0	0	0	0	0	0	0	0	0	0	0	0	0	0	0	0	5.9905	0	0	0	0	0	0	0	0	0	0	0	0	0	0	5.2714
305	lcl|c242743_g1_i1|m.30188	929.48	616.433	889.315	1134.91	693.404	933.297	772.164	1038.98	753.378	843.276	614.749	1002.07	851.381	208.119	552.602	511.952	717.96	715.702	763.303	952.515	639.347	758.179	186.401	616.912	533.264	606.824	670.553	578.269	596.329	644.208	726.102	648.141	1072.91	902.909
306	lcl|c242793_g1_i1|m.30226	12.8141	14.3021	5.9497	0	0	0	8.1803	5.9226	8.1323	0	2.6964	2.8244	0	0	5.2731	5.0597	8.2993	0	0	3.1312	12.7619	2.8145	0	0	3.0978	0	0	0	8.0797	8.8866	0	32.2954	9.5125	2.7932
307	lcl|c242793_g1_i1|m.30227	5.2075	26.1551	39.2906	23.3992	44.5524	77.0077	24.9331	33.0947	13.7703	82.6051	71.2266	57.3898	79.5209	0	0	56.546	42.1595	51.9725	116.097	66.8053	51.863	60.0494	13.9921	60.5223	81.8306	44.8255	70.4411	86.5347	0	60.1907	40.4089	2.9828	28.9933	45.4046
308	lcl|c242803_g1_i3|m.30250	0	0	18.9199	16.2754	55.7796	0	0	0	0	18.4681	0	17.963	0	0	0	16.0899	17.5946	0	0	0	20.2914	0	35.0361	0	19.7023	37.4144	0	0	0	0	0	18.6726	0	17.7645
309	lcl|c242839_g1_i1|m.30267	2.9263	8.1653	8.4919	8.7659	6.6762	4.8082	4.6703	8.4533	3.0952	6.6313	6.1577	3.225	3.3101	0	0	2.8887	1.5794	5.1539	12.6854	3.5753	0	3.2137	3.1451	1.6195	10.6116	6.7171	3.1667	9.7254	13.8385	8.4559	3.2439	13.4094	0	3.1893
310	lcl|c212821_g1_i2|m.2859	69.9982	0	23.2146	9.9849	22.8138	10.9536	21.2789	46.2181	21.1539	45.3206	31.5629	22.0405	33.9332	0	20.575	29.6133	21.5884	70.447	12.3852	0	24.8974	54.9093	10.7473	22.1367	24.1746	57.384	21.6423	0	10.5086	34.6743	22.17	103.1	0	54.4925
311	lcl|c242839_g1_i1|m.30268	1.8522	4.1346	2.15	0	2.1129	0	1.9707	0	1.9591	4.1973	1.9488	0	0	0	1.9055	0	0	2.1748	2.2941	2.263	0	2.0341	0	0	0	6.3774	2.0044	6.1558	1.9465	0	0	2.1219	0	0
312	lcl|c242839_g1_i1|m.30269	5.2579	0	0	10.5003	0	5.7595	5.5943	0	5.5614	0	0	0	5.9474	0	0	0	0	0	0	0	19.6368	5.7743	0	5.8198	6.3556	0	0	0	5.5255	0	0	6.0234	0	0
313	lcl|c242855_g1_i2|m.30293	0	0	14.4427	0	14.1933	13.6293	0	7.1885	0	0	6.5455	0	7.037	0	0	0	0	7.3046	0	15.2018	7.7448	0	0	0	7.52	21.4204	6.7322	6.892	0	0	0	14.2539	7.6971	6.7804
314	lcl|c242878_g1_i4|m.30326	0	7.8755	0	0	8.049	0	0	0	0	0	14.8478	7.7762	7.9814	0	0	6.9653	0	0	8.7394	0	8.7842	0	7.5836	7.8101	0	8.0983	0	0	7.4151	8.1557	7.8219	8.0834	0	0
315	lcl|c242885_g1_i1|m.30332	0	0	1.5636	0	0	0	0	0	0	1.5263	0	0	1.5237	0	0	0	0	0	1.6684	1.6458	0	0	1.4478	0	1.6283	0	1.4577	0	0	1.557	0	1.5432	0	1.4681
316	lcl|c242894_g3_i1|m.30343	15.3048	8.541	4.4413	19.1026	48.0106	25.147	8.1419	0	0	17.341	4.0256	21.0833	21.6397	0	11.8089	0	4.1302	4.4925	0	4.6747	4.7632	4.202	28.7856	8.4701	0	17.5654	0	38.1484	8.0418	0	33.9316	13.1497	4.7339	54.2111
317	lcl|c242902_g2_i1|m.30362	0	0	0	0	0	0	0	0	0	0	0	0	0	0	0	0	0	0	0	0	35.392	0	0	0	0	0	0	0	0	0	0	0	23.4494	0
318	lcl|c242924_g1_i1|m.30399	40.3012	244.896	98.7578	35.7702	194.105	117.721	204.868	72.438	47.3638	202.946	179.03	172.721	55.7164	0	27.6406	167.972	106.341	94.6389	127.561	240.723	289.877	226.214	14.438	247.821	189.445	61.672	247.132	168.663	9.4115	284.666	143.953	41.0387	277.012	190.334
319	lcl|c242928_g1_i2|m.30412	0	0	0	0	0	1.5042	1.461	0	0	0	0	0	0	0	0	0	1.4823	0	0	0	0	0	0	0	0	0	0	0	0	1.5872	0	0	0	0
320	lcl|c242974_g2_i1|m.30459	448.239	583.67	354.749	264.476	302.14	133.908	433.558	470.847	150.854	269.327	135.764	523.921	530.065	330.678	1243.67	462.585	652.465	95.6905	92.5279	199.143	465.011	231.214	328.464	120.276	525.394	155.893	448.311	75.2371	114.193	800.686	353.842	202.287	504.162	177.645
321	lcl|c212826_g3_i1|m.2861	118.739	124.495	121.121	100.599	86.1937	114.3	153.133	174.619	117.981	130.459	68.1424	114.995	126.17	0	136.962	159.834	120.404	92.9444	124.782	83.526	111.984	142.255	154.685	115.497	73.9379	132.148	112.917	111.61	155.03	124.766	127.637	144.27	84.5834	121.567
322	lcl|c242993_g3_i1|m.30478	0	0	0	0	0	0	0	0	0	0	0	0	0	0	0	0	0	0	0	0	0	0	0	0.454	0	0	0	0.4544	0	0	0	0	0	0
323	lcl|c243004_g1_i1|m.30509	4.13	4.6095	1.598	2.7492	6.2815	3.0159	5.8589	0	5.8245	4.6794	2.8968	6.0686	4.6716	0	4.2488	1.3589	2.9721	12.9311	6.8202	1.682	3.4276	6.0474	4.4387	7.6188	3.3281	7.9	4.4692	6.1003	14.467	3.1824	7.6303	11.0396	3.4065	6.0015
324	lcl|c243010_g3_i1|m.30515	79.3343	72.4472	83.7165	57.6122	57.5896	15.8003	130.451	16.6672	38.1425	89.8891	53.1169	31.7929	48.9479	0	74.1974	135.269	171.275	33.8727	17.8654	79.3049	80.8065	87.126	62.0109	39.9146	78.4604	140.718	39.0231	39.9489	22.7376	108.37	71.9544	123.933	71.3857	70.7438
325	lcl|c243015_g1_i1|m.30516	13.6828	13.3627	7.9412	11.9547	0	5.6205	7.2791	13.8339	12.6635	5.8137	5.3985	13.1942	7.7385	6.4059	10.5574	15.1951	9.2311	4.0164	8.4734	10.4482	6.3876	5.635	5.5146	9.4656	14.4718	11.7779	1.8508	9.4737	12.5816	9.8844	7.5839	21.5529	6.3483	3.7281
326	lcl|c243045_g1_i1|m.30553	0	1.5643	0	1.3994	1.5987	1.5352	2.9823	0	0	1.588	0	1.5445	0	0	0	0	0	1.6456	1.7358	0	0	0	0	1.5513	1.6941	0	0	1.5526	1.4728	1.6199	3.1072	1.6056	1.734	0
327	lcl|c243085_g1_i3|m.30591	2.4961	2.786	2.8974	2.4924	2.8474	2.7342	10.6232	8.6526	7.9206	2.8282	2.6262	0	0	0	0	2.464	0	5.8616	0	0	6.2148	2.7413	0	0	0	2.8648	8.1034	0	0	11.5404	5.534	0	3.0883	2.7205
328	lcl|c243086_g4_i2|m.30593	666.005	557.506	1017.2	516.264	579.788	815.926	708.612	941.695	472.721	466.668	599.299	531.164	475.795	98.4649	775.323	968.855	690.54	565.911	596.954	663.812	610.924	673.672	489.752	543.182	794.447	502.881	644.847	533.941	930.122	1033.14	718.856	481.874	531.267	420.237
329	lcl|c243097_g5_i3|m.30604	0	0	0	0	0	0	0	0	0	13.4804	12.5177	0	0	0	0	11.7445	0	0	0	0	14.8112	0	12.7869	0	14.3812	27.3098	0	0	0	27.5032	13.1887	13.6297	0	25.9336
330	lcl|c243112_g2_i2|m.30632	0	3.1258	3.2508	0	0	0	0	0	0	0	0	0	0	0	0	0	3.0231	0	0	0	0	3.0757	0	3.0999	0	0	0	0	0	0	0	3.2084	6.9301	0
331	lcl|c243117_g1_i1|m.30639	0	11.5141	23.9493	20.6018	11.7679	22.6005	10.9762	0	0	23.3774	0	11.369	0	0	0	10.1835	0	36.3382	0	12.604	12.8427	22.6588	11.0874	22.8372	37.4094	0	11.1636	22.8569	0	23.8477	11.4358	11.8181	0	22.4868
332	lcl|c179773_g1_i1|m.636	0	4.6528	4.8389	4.1625	4.7553	9.1327	0	0	8.8186	9.4466	4.386	0	0	0	0	0	0	0	5.1631	0	0	0	13.441	4.6142	0	0	0	4.6181	4.3808	0	0	0	0	4.5434
333	lcl|c212912_g1_i1|m.2890	0	0	0	0	0	0	0	0	0	9.7201	0	9.4542	0	0	0	8.4684	18.5206	0	0	0	10.6797	0	9.22	0	20.7392	9.8459	0	0	0	9.9156	19.0195	9.8277	21.2279	0
334	lcl|c243136_g1_i1|m.30659	0	0	0	0	0	0	0	0	3.5401	0	0	0	0	0	0	0	0	0	0	0	0	0	0	0	0	11.5239	0	0	3.5172	0	0	3.8342	0	0
335	lcl|c243149_g1_i2|m.30670	32.763	9.1419	57.045	32.7145	46.7166	80.7484	113.292	113.571	8.6635	18.5609	17.2354	72.2131	27.7946	0	50.5586	16.1708	8.8415	67.3199	20.2893	30.0216	40.7867	35.9808	8.803	81.5943	59.4039	47.003	35.4542	90.7383	60.2527	9.4672	45.3984	46.9161	40.5356	17.8538
336	lcl|c243154_g1_i1|m.30688	50.9362	85.2764	59.1248	81.3772	81.3453	117.169	59.6143	70.6271	64.6516	46.1703	48.2321	78.5882	86.4237	0	83.843	80.4496	60.4813	29.9033	37.8523	37.3394	107.798	55.9388	109.488	73.2932	67.7266	81.8439	71.6563	67.7134	69.5865	70.6488	79.0499	70.0223	63.0202	49.9628
337	lcl|c243228_g1_i1|m.30729	6.5724	3.6678	3.8145	3.2813	0	10.799	3.4964	0	3.4759	7.4468	13.83	7.2431	7.4343	0	3.3808	3.2439	7.0946	7.717	8.1403	4.015	8.182	3.609	7.0637	3.6374	0	11.3148	0	18.2025	10.3603	3.7983	10.9286	15.0586	0	3.5816
338	lcl|c243308_g5_i1|m.30798	6.392	0	7.4196	12.7651	0	0	0	0	6.7609	0	6.7252	7.0443	0	0	0	6.3098	0	0	7.9168	7.8095	0	7.0198	6.8698	7.0751	7.7264	0	0	0	6.7172	0	14.1714	14.6452	7.9084	6.9665
339	lcl|c243349_g1_i4|m.30872	13.6971	7.6438	7.9495	20.5153	23.4368	37.5092	14.5734	0	21.7316	7.7597	7.2055	30.1899	7.7467	0	14.0913	13.5209	22.178	8.0412	16.9646	8.3674	0	15.0424	29.4421	15.1608	33.1131	55.0211	14.8222	30.3478	21.5911	15.8317	15.1837	7.8456	25.4199	22.3923
340	lcl|c243371_g1_i1|m.30909	4.5785	2.5551	0	0	2.6114	2.5076	19.4858	18.5165	2.4214	0	0	0	0	0	0	0	0	5.3759	2.8354	2.797	5.6998	7.5423	0	0	0	2.6274	4.9546	0	4.8115	5.292	5.0754	7.8677	0	2.495
341	lcl|c243397_g1_i1|m.30938	125.381	139.941	85.9997	0	0	0	18.1913	32.9264	78.3655	51.6591	59.9622	94.2116	25.7861	0	17.5894	5.6258	12.3039	13.3833	49.4109	69.6306	49.6643	68.8478	0	25.2327	55.1113	32.7049	24.6692	25.2544	323.414	98.8095	37.9061	19.5867	21.1536	24.8455
342	lcl|c243413_g2_i1|m.30960	0	0	0	0	0	0	0	0	0	0	0	0	2.1564	0	0	0	0	0	0	0	2.3733	0	0	0	2.3044	4.3759	0	0	0	0	0	2.1839	0	0
343	lcl|c243429_g2_i2|m.30976	8.1634	12.1484	9.4758	40.7565	7.7601	8.9421	50.6663	44.0191	40.2948	35.4563	17.1778	19.4924	7.6949	0	100.78	18.8029	20.5613	3.195	3.3703	4.9869	25.4066	10.4593	29.2455	1.506	9.8676	9.3692	32.3912	7.5363	8.5788	48.7504	7.5411	7.7932	48.817	10.38
344	lcl|c212937_g3_i2|m.2900	17.7169	29.6614	20.5651	26.536	20.21	48.5173	9.4252	40.9432	18.7396	20.0741	9.3202	29.2875	10.0201	0	9.1134	8.7445	9.5623	31.2034	54.8584	43.2921	11.0279	29.1855	9.5207	19.6102	32.1233	30.5008	38.3445	29.4406	46.5461	30.7169	39.2795	50.7408	21.9201	9.6546
345	lcl|c243503_g5_i1|m.31038	23.4067	30.8747	41.9894	29.7462	33.9824	55.9406	20.3761	17.2111	29.2592	55.4526	33.582	30.4855	28.8831	0	19.702	21.0051	9.1878	47.4705	55.3454	33.7972	26.4901	37.3899	20.5826	51.8161	82.3072	51.286	20.724	77.7909	51.4317	22.1354	49.5352	34.1275	21.0616	44.0635
346	lcl|c243506_g1_i6|m.31041	32.14	20.4984	21.3182	16.0462	5.2375	10.0588	12.2129	2.6527	12.1411	15.6069	2.4154	25.3	18.1774	0	0	15.8633	7.4343	21.5641	11.3735	16.829	20.0056	20.1695	22.206	17.7873	33.2996	50.0615	22.3586	27.9755	67.5509	21.2278	17.8141	34.1893	17.0421	15.0123
347	lcl|c243516_g2_i1|m.31047	55.5261	29.9873	39.5031	30.4047	26.5617	21.5822	49.5495	41.3932	28.4183	30.442	30.1524	17.7656	30.3908	0	35.0114	22.9856	40.6029	37.8556	66.5535	24.0723	26.7579	13.7696	28.8759	21.8083	36.8065	34.9475	31.0127	33.7327	18.8231	4.1406	17.87	30.7791	33.2414	35.1387
348	lcl|c243541_g3_i2|m.31058	0	3.2779	0	2.9325	3.3501	0	3.1247	3.3935	0	0	0	0	0	0	0	8.6972	0	3.4483	3.6375	3.5882	3.6561	0	0	0	0	0	0	6.507	0	3.3945	0	3.3644	3.6336	6.4016
349	lcl|c243554_g1_i5|m.31071	119.53	230.436	138.746	119.353	123.955	107.126	231.231	188.339	206.885	123.121	137.194	167.655	172.079	0	178.865	96.5395	93.8377	114.829	161.503	106.21	94.6932	119.336	163.502	192.442	170.753	149.657	117.59	132.417	159.87	163.277	168.64	186.726	120.999	130.273
350	lcl|c243578_g4_i1|m.31087	0.6997	0.3905	0	0.3493	0.3991	0	0	0	0	0.3964	0	0	0	0	0	0	0	0	0	0	0	0	0	0	0	0	0	0.7751	0	0	0.7756	0	0.4328	0.3813
351	lcl|c243614_g4_i2|m.31123	29.1064	32.4862	78.833	58.1266	11.0674	74.3932	113.551	123.317	82.0972	120.922	71.4549	42.7691	87.7955	0	49.9066	57.464	41.8918	170.876	144.199	71.1227	36.2346	53.2751	41.7097	85.9115	70.3653	77.9466	115.49	161.222	50.9791	56.0705	75.2856	44.4586	36.0115	63.4448
352	lcl|c243628_g3_i2|m.31151	113.507	70.9449	94.8631	231.211	77.6875	64.6537	48.3074	99.678	48.0235	108.031	191.077	145.105	35.9497	0	28.0255	44.8187	73.5149	53.3095	56.2337	11.0943	45.2176	19.9448	107.353	100.509	76.8334	52.1091	34.3925	50.2978	66.7982	78.7173	35.2312	78.0193	50.5566	89.0701
353	lcl|c243633_g2_i1|m.31165	10.8303	24.1758	37.7141	21.6285	30.8857	23.7267	40.331	25.0284	22.9109	30.678	39.8818	17.9033	24.5011	0	27.8548	26.7274	23.3815	50.8654	20.1208	19.8482	26.9653	17.841	17.4599	17.9815	26.1824	37.2901	29.2998	41.9928	17.0721	31.2951	24.0114	37.2212	20.0995	29.5092
354	lcl|c243633_g2_i1|m.31166	11.56	51.6094	13.4184	0	26.3734	0	0	0	36.6817	39.2939	48.6502	12.7397	26.1519	0	23.7853	22.8226	0	27.1462	0	14.1237	43.1732	12.6953	12.4242	25.5906	41.9197	66.3375	25.0191	51.2253	0	0	38.4437	13.243	28.6049	25.1979
355	lcl|c212963_g1_i1|m.2911	0	0	0	26.536	0	0	0	0	0	0	0	0	0	0	0	0	0	0	0	0	0	0	9.5207	0	10.7078	50.8347	0	0	0	10.239	0	0	0	0
356	lcl|c243654_g1_i2|m.31195	0	0	0	0	0	0	0	0	0	5.9767	0	5.8133	0	0	0	15.6213	5.694	74.3227	45.7331	45.1134	39.4008	40.5511	0	52.5478	51.0091	12.1082	0	46.7493	0	0	0	36.2575	13.0527	40.2433
357	lcl|c243654_g1_i2|m.31196	0	0	0	6.5627	0	0	6.9929	0	0	0	0	0	0	0	6.7615	0	0	0	0	0	8.182	0	0	0	0	7.5432	7.1123	0	0	0	0	0	8.1316	0
358	lcl|c243671_g5_i1|m.31222	4.9393	5.5128	0	4.932	5.6343	0	0	11.4145	5.2244	5.5964	5.1967	0	5.587	0	0	4.8757	0	0	0	6.0347	6.1489	5.4244	0	10.9342	11.9408	5.6688	5.345	0	5.1906	5.709	0	0	6.1111	5.3832
359	lcl|c243673_g1_i1|m.31225	0	4.6056	0	4.1204	9.4143	13.5603	0	4.7681	0	4.6755	0	4.5476	18.6704	0	0	0	4.4543	4.8451	0	15.1248	0	18.127	0	13.7023	0	0	8.9309	9.1427	0	0	4.5743	0	0	0
360	lcl|c243724_g1_i1|m.31250	0	0	0	0	8.6614	5.5448	2.6929	0	0	11.4709	5.3258	0	2.8629	0	2.6038	0	0	5.9435	6.2695	6.1846	6.3017	2.7796	5.4404	2.8015	0	20.3339	5.4778	2.8039	2.6598	5.8508	0	11.5979	6.2629	0
361	lcl|c243765_g1_i1|m.31282	10.7234	7.9791	8.2982	10.7075	16.3098	23.4926	15.2126	8.2605	7.5616	8.1001	15.0431	7.8785	12.1296	0	3.6773	14.114	11.5754	16.7878	8.8543	8.7344	22.2493	15.7021	7.6834	19.7822	8.6414	20.5123	27.0766	11.8795	15.0254	12.3945	7.9248	12.2846	8.8449	11.6872
362	lcl|c243774_g1_i2|m.31291	2.876	3.2099	2.5037	2.1538	1.6403	3.1503	3.06	4.1539	2.2815	1.6293	4.5388	0.7924	0.8133	0	3.6984	2.1292	3.1045	5.0652	3.562	1.7569	1.7902	0.7896	1.5455	1.5917	0	1.6504	1.5561	2.3895	2.2667	0.831	1.594	2.471	2.6687	0.7836
363	lcl|c243791_g1_i1|m.31323	41.8764	25.1672	26.1738	28.9484	22.0473	17.6427	44.5554	7.4442	10.2216	10.9495	20.335	28.4	21.8621	0	29.8256	19.0789	24.3403	7.5645	55.8558	11.8069	12.0305	31.8387	48.469	28.524	66.1934	33.2736	20.9152	24.9799	60.9331	26.0628	32.1377	18.4512	3.9855	28.0862
364	lcl|c213022_g4_i5|m.2921	47.018	34.9852	63.6728	46.9484	8.939	77.2545	75.039	181.095	66.3093	26.6367	82.448	60.4524	44.3198	0	56.4328	46.4132	67.6714	82.8091	174.703	38.2968	58.5329	51.6358	58.955	26.0213	56.8335	80.9445	93.2803	164.943	74.1158	45.2877	34.7472	62.8406	29.0863	76.8658
365	lcl|c243799_g1_i1|m.31328	3.8625	6.4665	8.9668	11.5702	2.203	0	2.0548	2.2315	2.0427	4.3763	2.0319	4.2566	4.369	0	1.9868	3.8128	2.0847	2.2675	7.1758	14.1571	4.8084	4.2418	8.3024	0	0	2.2165	4.1797	0	4.059	6.6966	2.1408	2.2124	0	6.3144
366	lcl|c243884_g3_i1|m.31457	24.3277	0	0	8.0972	9.2504	0	0	0	0	0	8.5319	0	0	0	0	8.0049	0	0	0	0	0	8.9057	0	0	0	0	0	0	8.5219	9.373	8.9893	0	0	0
367	lcl|c243893_g1_i1|m.31474	32.368	23.2242	40.2552	39.2457	31.648	55.7158	54.1179	61.4439	26.8999	36.6743	58.3802	56.0548	52.3037	0	11.8926	45.6451	32.4439	35.2901	37.2259	48.0204	74.8335	53.3204	52.1815	48.6222	67.0716	45.1095	32.5248	40.9802	41.3039	56.1182	71.7616	47.6748	42.9074	55.4355
368	lcl|c243905_g1_i1|m.31490	0	5.0675	5.2702	0	0	0	0	0	0	0	0	0	0	0	0	0	0	0	0	0	0	0	0	5.0255	5.4881	26.0546	0	0	0	0	0	0	0	0
369	lcl|c243909_g1_i1|m.31505	5.6694	0	3.2904	8.4915	9.7008	6.2102	3.0161	0	0	3.2118	0	3.124	0	0	5.8326	2.7982	0	9.9851	0	6.9267	7.0579	3.1131	3.0466	0	0	3.2534	3.0676	0	5.9579	6.5529	0	6.4948	7.0144	6.179
370	lcl|c243935_g1_i3|m.31546	22.8927	0	10.6292	9.1435	0	0	0	0	14.5284	10.3754	4.8172	10.0916	5.1789	0	9.4206	0	9.8846	0	0	16.7818	0	0	19.6832	0	55.3435	36.7838	0	0	48.1151	5.292	10.1509	10.4902	5.6647	9.9801
371	lcl|c243938_g2_i1|m.31548	11.7328	9.0659	14.6666	17.1226	9.2657	9.8861	15.3642	10.4285	18.1378	11.2486	7.5965	13.9248	31.6472	0	15.7844	11.5819	25.3299	3.1791	16.7674	3.308	17.9769	2.9735	21.3398	6.9928	8.7275	12.43	9.7666	7.9986	8.536	20.8634	16.0076	11.3731	25.6827	16.7219
372	lcl|c243954_g3_i1|m.31569	22.6383	25.2671	19.7083	11.3024	6.456	24.7977	12.0433	6.5395	17.9588	12.8251	17.8637	6.2372	6.4018	0	5.8224	5.5868	24.4369	26.5807	28.0387	13.8294	0	6.2154	6.0827	25.0575	13.6821	12.9911	24.4979	25.079	23.7902	6.5416	12.5476	25.9342	7.0022	18.5047
373	lcl|c213072_g1_i1|m.2941	6.6529	14.8509	0	0	7.5891	0	0	0	0	15.076	6.9997	0	0	0	6.8443	6.5673	7.1815	0	0	0	8.2822	7.3063	7.1502	0	0	0	0	0	6.9914	15.3793	0	7.6215	0	0
374	lcl|c243966_g1_i2|m.31591	0	0	0	4.8295	0	0	0	0	0	0	0	0	0	0	0	0	0	0	0	0	18.0636	0	0	0	0	11.1022	0	0	0	0	0	0	0	0
375	lcl|c244055_g1_i3|m.31694	2.9106	3.2486	0	5.8127	4.9803	12.7531	4.6453	5.0448	3.0786	8.2447	4.5935	8.0192	3.2923	0	4.4916	2.8732	7.8547	6.835	7.21	5.3342	7.2469	6.393	3.1282	11.2759	14.0731	5.0109	7.8743	4.8367	0	3.3642	3.2265	13.3376	3.6012	3.1722
376	lcl|c244083_g1_i1|m.31720	0	0	0	0	0	0	0	8.9685	0	0	0	0	0	0	0	0	0	0	19.2266	0	0	0	0	0	0	0	0	8.5985	0	0	0	0	19.2062	0
377	lcl|c244084_g2_i1|m.31724	18.4524	10.2975	17.849	18.425	17.5408	10.1063	13.0886	21.3214	19.5175	13.9382	19.4142	6.7785	10.4361	0	9.4917	6.0717	13.2789	25.2767	19.0452	15.0297	11.4857	10.1323	9.9159	20.4242	18.5871	17.6483	16.6401	27.2557	29.0869	10.664	13.6366	10.5694	11.415	13.4072
378	lcl|c244126_g1_i2|m.31771	25.7091	22.9556	29.8422	18.8254	23.4615	13.142	21.8831	23.7652	29.006	21.3617	19.8361	18.8885	27.1418	0	33.5019	16.9189	18.5011	16.0993	14.8597	31.4106	32.0054	24.4696	22.1048	28.4565	26.9327	55.079	22.2567	30.3797	23.415	23.7725	17.0996	35.3425	12.7233	18.6799
379	lcl|c244145_g1_i1|m.31801	510.882	497.799	545.948	445.348	675.276	328.663	586.706	402.914	497.485	679.921	878.789	464.715	587.051	182.234	558.953	784.483	665.267	637.937	532.318	515.197	323.047	525.435	305.041	502.646	401.887	362.975	456.318	323.407	860.71	496.768	611.274	641.001	341.124	636.342
380	lcl|c244164_g1_i1|m.31837	0	0	1.414	0.6082	0	0	0.6481	0	0	0.6901	0.6409	0	0	0	0	0	0	0	0	0.7442	0.7583	0.6689	0	0	0	0.6991	0	0	0.6401	0	0	0.6978	0	0
381	lcl|c244169_g2_i1|m.31846	0	0	0	3.7074	0	0	0	4.2902	3.9272	0	0	4.0918	4.1998	0	0	3.6651	0	17.4379	0	0	4.6222	4.0775	0	0	0	4.2613	4.0179	0	7.8036	4.2915	0	4.2534	0	0
382	lcl|c244173_g1_i4|m.31852	27.9421	41.5824	32.4342	37.201	42.4988	51.0125	39.6396	32.2867	49.2583	52.7661	29.3986	41.0583	21.0709	0	38.3282	27.5827	30.1621	43.7442	57.6797	56.8981	34.7853	40.9153	30.031	30.9281	33.7753	32.0695	30.2374	51.5912	58.7279	43.0621	41.2995	53.3504	34.5711	50.7558
383	lcl|c244176_g3_i1|m.31854	0	7.1623	14.8976	0	0	0	0	0	0	0	0	0	0	0	0	0	0	0	0	0	0	7.0474	0	0	0	14.7301	0	0	20.2311	0	14.2272	7.3514	7.9396	0
384	lcl|c213117_g1_i3|m.2966	46.7611	67.1027	69.7866	106.724	99.0622	87.8084	99.5052	84.9069	77.7232	52.9823	56.2268	14.7238	7.5562	0	68.7238	32.9711	43.2653	109.809	82.7373	114.263	108.11	58.6899	78.9749	73.9402	56.5229	76.6688	93.9754	81.4041	35.1004	84.933	59.2412	61.2217	49.5897	50.9639
385	lcl|c244197_g2_i1|m.31877	0	5.8122	12.0894	10.3996	11.8806	22.8171	5.5407	0	11.0162	5.9004	10.9579	5.739	5.8904	0	0	5.1405	0	0	19.3494	6.3624	0	17.157	0	17.2921	18.884	11.9535	5.6353	23.0759	21.8901	18.0572	11.5454	17.8971	6.443	11.3511
386	lcl|c244235_g1_i2|m.31919	44.0529	108.17	40.9079	43.9877	100.504	67.5571	140.614	122.166	65.234	39.9311	55.619	48.5487	49.8299	0	108.769	69.578	85.5952	72.4144	65.4743	64.5871	87.7466	58.0554	85.223	117.025	53.2494	80.8959	104.877	48.8025	111.107	61.1017	58.6007	80.7465	119.909	48.0123
387	lcl|c244249_g2_i1|m.31932	69.1498	110.256	80.2663	49.3195	101.418	75.7458	94.5946	148.388	114.936	78.3496	83.1476	43.5467	89.3918	0	81.3023	48.7573	63.9803	81.1919	159.056	72.4158	24.5956	43.395	42.468	54.6709	71.6447	34.0131	74.8298	76.6051	124.574	68.5079	65.7038	67.9005	122.221	53.832
388	lcl|c244252_g1_i1|m.31940	0	0	0	0	0	0	0	0	0	0	0	0	0	0	0	0	0	0	0	0.4023	0	0	0	0	0	0	0	0	0	0.3806	0	0	0	0.3589
389	lcl|c244255_g3_i1|m.31943	111.043	88.527	124.291	130.679	81.4301	117.291	160.343	178.716	104.869	98.8562	112.659	126.746	174.95	14.8536	163.198	160.508	102.742	55.8777	78.5904	150.206	123.427	152.437	144.918	83.4031	134.225	163.858	102.998	92.2616	108.359	82.5095	87.9248	195.358	186.454	103.735
390	lcl|c244259_g1_i1|m.31949	0	0	0	0	0	0	9.555	0	4.7494	5.0876	0	4.9485	10.1582	0	4.6195	0	9.694	0	0	0	0	0	4.8259	0	0	10.307	0	9.9487	4.7187	0	0	10.2879	0	0
391	lcl|c244264_g3_i1|m.31952	3.6221	0	8.4089	10.8503	4.1318	3.9676	0	12.5559	0	0	7.6219	3.9918	4.0971	0	11.1791	0	11.7297	4.2529	0	0	0	0	0	0	8.7566	29.1001	11.759	8.0253	11.4193	4.1866	0	0	0	0
392	lcl|c244278_g1_i1|m.31973	10807.7	7961.51	11424.5	2659.65	5312.35	3807.28	737.201	2624.93	5856.94	5971.58	7331.72	7053.77	8139.29	9827.28	6315.98	7047.04	7994.19	5381.34	8694.16	6543.29	6949.98	8632.12	2246.22	1137.8	0	91.2546	4166.86	5423.37	1736.77	2120.28	2140.53	7924.48	4946.76	4852.75
393	lcl|c244304_g2_i1|m.32002	0	0	2.4287	4.1785	0	2.292	0	0	0	0	2.2014	0	0	0	0	0	0	0	0	0	5.2096	2.2979	0	0	0	0	0	0	0	2.4184	2.3195	2.397	0	0
394	lcl|c213147_g4_i1|m.2980	53.9721	12.0479	150.357	43.1138	49.2535	35.4723	22.97	49.8911	11.4175	48.9222	90.8566	23.7921	0	0	66.6302	85.2446	34.9561	50.6969	26.7389	26.3766	67.1901	23.7092	23.2027	47.7918	26.0957	74.3332	58.4055	35.8747	0	74.8597	47.8637	160.758	106.842	35.2938
395	lcl|c244315_g1_i2|m.32024	59.4875	106.232	151.912	154.439	108.573	91.2268	126.586	96.2316	100.674	107.843	137.694	52.4467	107.662	0	110.159	164.423	64.2138	41.9082	73.6785	130.824	103.679	130.66	89.5084	79.0135	158.194	150.204	102.998	92.2616	37.5087	68.758	79.1323	81.7779	103.04	103.735
396	lcl|c244324_g2_i1|m.32048	0	0	0.568	0	0	0	0.5206	0	0.5176	0	0	0.5393	0	0	0.5034	0	0	0	0	1.1957	0.6092	0	0	0	0	0	0.5295	0	0.5142	0	0.5424	0	0	0
397	lcl|c244350_g3_i3|m.32077	0	12.4605	0	0	0	12.229	11.8783	38.6998	11.8085	0	0	0	12.6281	0	0	11.0205	12.0511	39.3249	13.8273	13.64	13.8982	12.2606	11.9987	12.3571	0	0	48.3246	12.3677	11.7322	0	24.7514	0	0	0
398	lcl|c244363_g1_i1|m.32089	4.137	4.6173	0	4.1308	4.7191	0	0	0	0	0	0	4.5591	0	0	0	4.0837	0	0	5.1238	0	0	0	0	0	5.0006	0	0	9.1659	4.3475	4.7816	4.5859	9.4785	0	0
399	lcl|c244364_g1_i1|m.32091	102.674	114.597	74.4879	192.23	146.403	84.3514	259.452	430.065	176.477	87.251	94.5231	70.7205	159.691	0	13.2036	164.7	193.956	0	31.792	62.7224	143.797	42.2845	427.606	142.058	108.595	132.571	208.328	142.18	364.159	178.013	113.818	29.4057	111.154	55.9513
400	lcl|c244389_g3_i1|m.32131	4.6044	0	5.3446	0	0	0	9.7979	10.6406	0	0	0	0	0	0	0	0	0	5.4062	0	0	0	0	0	0	0	0	0	0	0	0	0	0	5.6967	5.0182
401	lcl|c244396_g1_i1|m.32137	56.2055	104.553	108.735	81.0654	64.1145	34.2038	172.759	158.753	46.2387	113.215	59.1351	75.7062	42.384	304.072	70.6723	80.1413	53.9297	80.6586	162.431	45.7801	85.5193	96.0176	194.645	131.336	135.878	265.198	114.886	69.1836	124.694	72.1827	145.379	157.394	92.7194	81.6761
402	lcl|c244407_g1_i3|m.32143	52.9589	6.5676	6.8303	41.1293	26.8494	19.3369	12.5215	13.5985	6.224	13.3344	0	6.4848	13.312	0	6.0536	17.4259	19.0555	13.8181	0	21.5679	21.9762	19.3867	12.6484	6.5131	28.4509	60.7815	19.103	39.1124	74.205	27.2053	19.5688	53.9282	29.1213	64.1319
403	lcl|c244439_g1_i1|m.32192	276.704	284.707	265.983	431.709	384.687	260.475	142.603	189.838	320.114	313.517	322.969	238.236	249.414	0	137.885	234.733	149.344	106.605	369.487	306.375	279.881	308.628	157.988	253.632	292.66	312.613	145.038	162.847	454.349	304.833	263.6	307.083	160.476	320.421
404	lcl|c244441_g1_i1|m.32200	4.9999	0	5.8037	0	0	0	0	0	0	0	0	0	0	0	0	0	0	11.7412	6.1926	0	0	5.4909	10.7473	5.5342	0	0	5.4106	5.5389	5.2543	0	5.5425	5.7278	0	0
405	lcl|c213160_g2_i5|m.2982	63.6703	284.255	147.812	127.152	203.363	167.385	392.912	132.426	80.8145	158.71	267.956	196.47	187.251	572.327	157.206	188.554	192.441	134.565	110.403	108.907	332.906	167.816	273.72	169.138	169.316	189.995	482.302	14.107	107.056	515.148	211.741	160.468	204.816	138.786
406	lcl|c244452_g2_i2|m.32209	4.4172	24.6508	10.2547	8.8214	15.1164	4.8386	4.6998	0	18.6888	0	4.6475	0	0	0	0	4.3604	14.3045	20.7459	5.471	26.9842	0	9.7021	9.4949	14.6678	5.3394	5.0697	14.3402	4.8935	0	0	0	0	16.3955	0
407	lcl|c244474_g3_i1|m.32253	92.2618	57.2085	71.3959	76.7709	128.632	106.677	92.7106	23.6904	130.116	121.959	124.035	124.272	63.776	0	63.2778	80.9555	99.5919	126.384	82.5292	106.46	140.381	118.21	55.0883	102.121	111.522	82.3587	55.4669	113.566	113.116	82.942	85.229	46.9752	88.7832	106.14
408	lcl|c244484_g2_i1|m.32270	0	3.7127	3.8612	0	3.7945	7.2875	3.5393	3.8437	3.5185	3.769	0	3.6659	3.7627	0	0	0	3.5907	7.8115	4.12	0	0	3.6531	0	3.6819	4.0209	11.4534	0	7.3702	6.9914	0	0	0	4.1156	10.8763
409	lcl|c244488_g3_i1|m.32282	3.7818	8.4419	8.7795	18.881	25.8838	0	4.0237	0	0	4.2849	7.9579	4.1678	0	0	0	7.4663	4.0823	0	0	0	14.1239	0	48.7742	0	4.5713	4.3404	4.0925	0	0	26.2269	0	8.6648	0	0
410	lcl|c244489_g1_i1|m.32283	12.9362	4.8128	10.0105	8.6113	4.9188	4.7234	9.1758	0	0	0	4.5368	4.7521	4.8775	0	8.8723	21.283	9.3093	5.063	10.6814	21.0734	32.2086	9.4711	41.7097	19.0914	5.2122	24.745	4.6663	4.777	13.5944	14.9521	43.0204	9.8797	10.6701	4.6996
411	lcl|c244503_g2_i1|m.32303	0	0	0	6.7533	0	7.4085	0	0	0	0	14.2317	7.4535	0	0	0	13.3526	0	7.9411	8.3767	0	0	7.4276	0	0	0	0	0	7.4925	0	7.8173	7.4973	0	0	0
412	lcl|c244508_g1_i1|m.32310	53.7349	73.3023	55.443	47.6936	88.5391	58.8606	57.1726	62.0898	25.2607	47.3542	62.8175	46.059	54.028	0	61.4235	53.0437	51.5592	63.0926	59.1587	51.0624	66.8947	59.0124	25.6675	52.8686	57.7356	54.8196	77.5317	85.9853	87.8409	41.4059	79.4222	61.5581	44.3219	45.5501
413	lcl|c272541_g1_i1|m.32419	0	0	0	0	0	0	0	0	0	0	0	0	0	0	12.4212	11.9185	13.033	0	0	0	0	0	0	0	0	0	0	0	0	0	0	0	14.9381	0
414	lcl|c65293_g1_i1|m.32646	4.137	41.556	4.802	4.1308	4.7191	9.0631	17.6064	0	8.7515	18.7494	39.1733	13.6774	4.6795	0	4.256	12.2512	4.4656	72.8608	51.2383	20.2176	10.3002	18.173	0	27.4742	5.0006	0	13.4303	13.7489	0	23.9082	18.3437	0	10.2368	40.5789
415	lcl|c81884_g1_i1|m.32679	18.1106	0	63.0664	27.1257	154.943	0	0	0	0	359.103	76.2186	0	20.4856	0	102.475	44.6942	0	0	0	55.3176	11.273	29.834	87.5903	30.069	142.294	41.5715	0	0	0	52.3324	30.1143	103.737	0	365.16
416	lcl|c213262_g2_i4|m.3006	7.6885	0	26.7735	0	8.7704	8.4219	8.1803	8.8839	0	8.7114	16.1785	8.4731	8.6967	0	0	7.5896	16.5987	0	19.0452	9.3936	9.5714	8.4436	8.2632	0	0	8.8241	8.32	8.5174	8.0797	8.8866	25.5687	17.6157	0	8.3795
417	lcl|c89067_g1_i1|m.32704	0	0	0	0	0	0	0	0	0	2.6459	0	0	0	0	2.4024	0	0	0	0	0	2.9071	0	0	0	0	0	5.054	0	0	0	0	0	0	0
418	lcl|c98777_g1_i1|m.32741	0	0	0	14.0306	0	0	14.9503	0	0	0	0	0	0	0	0	0	0	32.9967	0	0	34.9852	0	0	0	0	32.2538	0	0	0	16.2411	0	0	0	0
419	lcl|c169738_g3_i1|m.502	0	0	0	2.7539	0	0	0	0	0	0	0	0	0	0	0	0	0	0	0	0	0	0	0	6.1054	3.3337	0	0	0	0	0	0	0	0	0
420	lcl|c185981_g1_i2|m.719	0	5.9843	0	16.0613	6.1162	5.8732	0	0	0	0	0	0	0	0	0	0	0	0	0	0	0	0	0	0	19.443	0	0	0	0	0	0	0	6.6337	0
421	lcl|c188073_g1_i1|m.763	12.1187	0	7.0334	12.1007	0	0	6.447	0	0	0	6.3752	6.6777	0	0	18.701	5.9814	0	7.1145	7.5048	14.8062	7.5433	6.6544	0	0	0	6.9543	0	6.7126	12.7353	14.0072	6.7169	13.883	0	13.2078
422	lcl|c195747_g2_i1|m.945	3259.92	2801.61	2062.27	1415.96	1803.54	2874.55	2584.01	3013.42	1913.69	1551.32	1526.28	1670.56	1438.09	3357.65	1995.46	2252.59	2128.94	2239.16	2382.17	1832.12	1197.19	1772.14	2277.35	3139.2	2068.74	1122.43	2275.36	2221	3185.99	1243.42	1770.72	1251.07	1572.98	1865.28
423	lcl|c243887_g1_i1|m.31460	0	0	0	3.7675	0	0	0	0	0	0	0	0	0	0	3.8816	3.7245	0	0	0	0	4.6971	4.1436	0	0	4.5607	4.3304	4.083	0	0	4.361	0	4.3224	4.6682	0
424	lcl|c201441_g1_i1|m.1204	4.0546	13.5763	0	12.1459	9.2504	8.8828	4.314	4.685	4.2887	9.1881	8.5319	0	0	0	0	4.0025	0	14.2822	10.0437	0	5.0476	13.3585	0	4.4879	24.5053	9.3071	4.3877	17.9671	17.0438	14.0595	4.4947	13.9348	0	4.419
425	lcl|c202129_g1_i1|m.1242	90.0982	155.412	171.135	122.679	186.867	251.217	200.439	198.75	103.962	129.927	129.265	162.48	101.913	0	134.823	145.537	141.464	192.343	162.315	220.159	101.967	143.923	132.046	163.189	108.907	94.006	203.862	235.919	120.505	189.344	127.115	84.4491	81.0712	98.196
426	lcl|c213278_g3_i2|m.3010	4.9694	0	11.5365	14.8861	17.006	21.7736	5.2873	0	5.2562	5.6305	5.2284	16.4296	11.2421	0	15.3371	0	5.3642	17.5044	6.1548	18.2143	12.3728	16.3723	5.3409	11.0009	6.0068	5.7034	21.5103	27.5258	10.4445	0	5.5087	17.0786	6.1483	10.832
427	lcl|c202472_g1_i1|m.1259	1912.07	5440.2	1964.76	1987.48	2306.27	2746.83	3351.74	2499.11	2221.36	2006.63	1632.47	2469.91	3173.3	5987.43	2692.65	2428.96	3146.72	2355.46	3862.88	2929.71	1599.9	2839.97	2391.89	6245.1	2671.17	917.371	3273.29	2378.65	4595.18	1938.31	2710.28	1400.45	1939.08	2169.32
428	lcl|c202894_g5_i1|m.1285	188.072	225.46	210.221	27.8213	0	0	274.216	354.142	154.722	15.7847	80.6158	61.412	78.7908	0	236.48	192.529	195.495	0	0	8.5104	69.3723	22.9493	194.645	231.3	210.494	39.9726	0	46.2998	0	8.0511	30.8864	15.9595	51.7089	7.5917
429	lcl|c203483_g1_i2|m.1328	30.5236	0	21.2583	12.1913	13.9275	0	6.4953	7.0539	25.8283	27.6676	19.2687	26.9109	20.7158	0	12.5608	18.0786	13.1795	7.1678	15.122	0	7.5998	20.1128	13.1221	6.7571	22.1374	21.0193	6.6062	6.7629	12.8307	21.1682	27.069	20.9805	7.553	13.3068
430	lcl|c204986_g3_i2|m.1414	17.8463	13.2791	69.0508	29.6997	27.1434	78.1944	6.3293	6.8737	25.1685	47.1814	75.1059	13.1117	13.4577	0	12.2399	35.2334	25.6855	27.9388	58.9428	21.804	44.4337	45.731	6.3935	32.9223	43.1437	40.9646	45.0618	72.4913	43.7602	34.379	52.7549	34.0741	58.8802	58.3507
431	lcl|c205358_g1_i2|m.1452	0	0	5.241	0	0	4.9458	0	0	0	0	0	0	0	0	0	0	0	0	5.5922	0	11.2418	4.9586	0	0	5.4577	5.182	0	5.0019	14.2346	0	0	15.5174	0	0
432	lcl|c206427_g2_i4|m.1541	52.5793	78.2465	81.376	96.2526	49.9818	124.789	46.6192	50.6287	92.6904	99.291	73.7599	144.863	69.3868	0	63.1077	112.456	122.973	61.7358	21.7074	64.2398	109.094	67.3672	103.602	38.7987	95.3336	70.4034	66.3813	38.8321	18.4183	70.902	67.9999	90.3514	97.5797	114.61
433	lcl|c206727_g2_i2|m.1580	0	0	7.8506	0	0	0	0	0	0	0	0	0	0	0	0	0	0	0	16.7534	0	0	0	0	0	0	0	0	0	0	0	0	0	0	0
434	lcl|c206859_g1_i1|m.1600	0	0	0	90.4191	142.031	78.5262	64.2309	26.1582	43.8992	42.7503	31.7577	62.3716	17.0713	0	42.6978	55.8677	52.9466	39.871	70.0969	0	0	0	64.8817	121.111	114.018	77.9466	40.8298	29.2589	0	0	0	103.737	93.3633	139.814
435	lcl|c236885_g1_i5|m.22663	3.747	0	0	0	0	0	3.9867	8.6593	0	0	0	0	4.2384	0	15.4194	0	8.0895	0	0	4.578	0	4.115	0	0	0	25.803	0	0	0	0	0	0	0	0
436	lcl|c236885_g1_i7|m.22665	3.9755	0	0	0	4.5349	0	0	0	0	0	0	0	0	0	0	0	0	4.6678	0	9.7143	9.8982	4.366	0	0	0	0	0	0	0	0	0	0	0	4.3328
437	lcl|c236885_g1_i3|m.22659	0	20.8627	17.3577	0	0	0	0	0	0	0	0	0	4.2287	0	0	14.7614	8.0709	0	0	0	0	4.1056	0	0	0	0	0	24.849	0	0	0	0	0	0
438	lcl|c207332_g2_i2|m.1633	0	117.026	0	0	0	0	0	0	0	0	0	0	0	0	0	0	0	0	0	0	0	0	0	0	0	0	0	0	420.712	594.937	633.984	480.465	471.73	238.938
439	lcl|c207917_g13_i1|m.1708	0	0	0	0	0	0	0	0	0	41.973	0	0	0	0	0	0	26.6584	391.461	152.939	0	0	0	0	0	0	14.1721	0	82.0769	0	0	0	0	0	0
440	lcl|c182463_g1_i1|m.663	33.7233	62.7321	65.2411	101.02	89.7603	49.2535	59.8012	155.867	71.3397	38.2099	70.9621	24.7766	50.8608	0	80.9519	44.386	84.9393	13.1987	41.7681	54.9361	83.9644	61.7256	48.3257	62.2117	67.9389	64.5075	60.8223	87.1713	35.4393	103.943	62.3054	0	97.3554	36.7542
441	lcl|c213306_g2_i1|m.3016	8.0294	0	0	8.0175	18.3184	8.7953	8.543	9.2778	0	0	0	0	0	0	8.2604	7.9261	0	9.4276	0	0	29.9873	8.8179	8.6296	0	9.7056	27.6461	0	0	0	0	0	0	19.8684	0
442	lcl|c208130_g1_i1|m.1735	130.92	87.6737	129.172	26.1453	67.2044	100.386	48.7536	75.6381	55.3909	118.671	82.6467	21.6422	51.8311	0	26.9375	64.6181	42.3966	153.72	105.399	95.9728	89.6407	71.8893	35.1768	72.4555	23.7377	97.668	85.0046	116.028	110.066	45.3968	101.59	44.9943	24.2969	85.6123
443	lcl|c208140_g2_i1|m.1739	14.773	21.9847	11.432	44.2535	33.7037	16.1822	47.1544	45.52	52.0859	39.0565	15.5431	32.5613	11.1402	0	25.3302	24.305	42.5246	5.7819	6.0991	36.0985	36.782	10.816	21.1699	5.4506	0	0	37.3019	16.3658	0	56.9175	5.4588	5.6413	36.5555	5.3669
444	lcl|c209131_g1_i2|m.1905	0	7.4254	0	6.643	7.5891	0	7.0785	0	0	0	0	7.3318	0	0	0	6.5673	0	7.8115	0	0	8.2822	7.3063	7.1502	0	8.0417	22.9068	0	0	6.9914	23.069	7.3749	15.243	8.2312	0
445	lcl|c209570_g1_i3|m.2003	29.8527	13.3277	6.9304	23.8468	0	6.5401	63.5251	68.9886	37.891	20.2946	37.6905	46.059	40.521	22.362	36.8541	29.4687	51.5592	0	7.3948	7.2946	66.8947	19.6708	38.5012	0	57.7356	54.8196	0	6.6143	25.0974	75.9108	59.5667	61.5581	36.9349	26.0286
446	lcl|c209946_g1_i6|m.2078	0	0	0	15.7251	0	8.6253	0	0	0	0	0	0	0	0	0	0	0	0	9.7526	0	0	8.6475	0	0	0	18.0746	0	0	0	0	0	9.0206	0	0
447	lcl|c210031_g1_i2|m.2100	22.6383	8.4224	8.7592	45.2096	34.4319	74.3932	72.2598	34.8776	47.8901	8.5501	7.9394	24.9486	25.607	0	23.2897	22.3471	32.5825	17.7205	18.6925	18.4392	46.9708	8.2872	32.4409	41.7625	45.6071	51.9644	16.3319	66.8775	0	8.7221	50.1904	43.2237	56.018	32.8973
448	lcl|c210253_g1_i2|m.2149	435.183	556.366	257.164	339.73	342.982	338.02	816.605	813.697	602.578	457.221	432.892	357.516	402.751	29.6351	480.266	265.562	418.512	668.904	725.196	261.013	285.656	338.892	297.637	621.816	430.39	354.165	453.805	508.399	690.148	283.51	350.846	226.609	509.056	457.049
449	lcl|c243393_g3_i1|m.30930	376.144	478.131	303.204	354.721	309.887	274.683	544.727	507.066	442.062	603.766	241.847	426.046	319.103	821.803	333.222	257.851	473.7	527.524	504.697	268.078	767.431	378.663	314.427	474.165	593.594	407.721	373.121	393.548	483.125	241.534	416.967	359.089	685.143	466.889
450	lcl|c223677_g1_i1|m.9303	158.468	168.447	131.388	218.513	129.119	115.723	152.548	52.3164	255.414	171.001	119.091	108.111	136.571	0	131.975	74.4903	179.204	132.903	130.847	101.416	131.518	107.734	64.8817	66.82	182.429	173.215	73.4936	91.9565	309.273	104.665	100.381	129.671	280.09	230.281
451	lcl|c224624_g4_i1|m.10025	24.4494	72.7692	47.2998	56.964	55.7796	53.5631	95.3829	113.003	34.4808	64.6385	51.4475	71.852	73.7482	0	100.612	48.2697	35.1891	76.5524	70.6576	39.8287	101.457	53.7013	61.3132	108.248	49.2557	74.8287	35.2769	54.1707	42.8224	56.519	54.2057	56.0179	50.4162	53.2936
452	lcl|c224624_g2_i1|m.10023	31.4968	26.3657	18.2801	0	26.9467	34.5012	41.8897	0	58.3009	26.7654	49.7078	34.7111	44.534	0	16.2016	54.4103	50.9988	0	0	67.3432	68.6183	51.8853	42.3142	0	0	81.3356	59.647	34.8926	49.6492	9.1013	34.9151	54.1236	48.7113	34.3276
453	lcl|c235513_g2_i1|m.20994	73.4817	74.5586	62.0325	86.7134	68.5815	43.9042	35.5376	30.8752	42.3945	83.258	42.1701	29.4476	22.6685	0	13.7448	52.7538	21.6327	47.0609	82.7373	73.4546	24.9484	36.6812	21.5386	88.7282	56.5229	84.3357	43.3733	59.203	91.2609	38.6059	74.0514	53.569	24.7948	80.0861
454	lcl|c222682_g3_i7|m.8525	99.6481	87.3866	66.0958	149.251	73.0738	93.5601	113.596	164.488	127.986	112.906	67.3985	156.882	120.767	0	292.901	91.3401	192.081	100.287	141.051	52.1773	88.6087	125.069	68.8483	118.175	111.847	114.367	107.833	102.507	142.118	98.7232	78.902	114.156	70.4505	124.119
455	lcl|c229067_g1_i6|m.13938	41.7938	31.0979	24.2563	55.6425	63.5665	45.7805	29.645	56.3407	22.1031	31.5695	7.3287	38.3825	55.1536	0	28.6643	20.6281	15.0381	24.536	25.8819	59.5728	34.6862	45.8985	44.9181	46.26	33.6791	31.9781	15.0756	15.4333	21.9602	8.0511	30.8864	39.8988	8.6181	15.1834
456	lcl|c235115_g6_i1|m.20588	0	0	51.8354	29.7268	42.4503	0	79.1888	51.5997	0	16.8659	15.6614	49.2137	33.675	0	15.3138	0	24.1022	17.4777	0	0	18.531	57.216	31.9965	16.4762	0	34.1684	24.1623	24.7355	23.4644	34.4104	41.2524	25.5789	27.6253	0
457	lcl|c244515_g4_i1|m.32348	7.5113	16.7671	17.4377	15.0004	8.5683	8.2278	0	0	23.8347	17.0213	7.9028	8.2779	16.9927	0	7.7275	7.4147	16.2162	17.6388	46.5159	27.5314	18.7018	16.4981	32.2914	0	9.0794	43.1041	0	8.3212	39.4677	17.3638	16.653	25.8147	46.4665	16.3729
458	lcl|c231210_g4_i4|m.16042	0	0	0	24.1714	0	0	0	0	0	9.1426	0	0	0	0	0	7.9653	8.7102	0	0	0	0	8.8616	0	0	0	0	0	0	0	9.3266	8.9448	0	0	0
459	lcl|c219953_g4_i1|m.6659	0	9.0509	0	8.0972	0	8.8828	0	9.3701	0	18.3762	8.5319	0	0	0	0	0	0	0	0	9.9076	0	0	0	0	9.8021	0	0	17.9671	0	0	8.9893	9.2899	0	0
460	lcl|c220204_g2_i2|m.6810	0	0	0	0	0	0	0	0	0	8.9651	0	8.7199	0	0	0	0	0	0	0	0	9.8502	8.6895	0	0	9.5642	18.1623	0	0	0	0	0	0	9.7895	0
461	lcl|c222854_g1_i1|m.8663	13.4153	7.4865	0	0	0	0	0	0	7.0948	0	0	7.3922	0	0	0	0	0	7.8758	0	0	0	0	0	0	0	0	0	0	14.0979	0	0	0	0	7.3105
462	lcl|c214584_g4_i1|m.3540	6.7633	30.1947	0	0	0	7.4085	0	0	7.1537	0	0	0	0	0	0	20.0289	0	0	0	33.0529	0	0	0	0	16.3504	0	0	0	0	0	0	0	0	7.3712
463	lcl|c220736_g3_i1|m.7111	0	0	0	7.8247	8.939	0	0	0	0	0	0	0	0	0	0	7.7355	8.4589	0	0	0	9.7555	8.606	25.2664	0	18.9445	8.9938	0	0	0	9.0575	0	0	0	0
464	lcl|c233257_g5_i1|m.18320	0	0	0	0	0	0	0	0	0	0	0	0	0	0	0	0	0	0	0	0	9.8502	0	0	0	9.5642	0	0	0	0	0	0	0	0	0
465	lcl|c229067_g1_i3|m.13935	0	0	0	0	0	0	0	0	0	0	0	0	0	0	0	0	0	0	0	0	0	0	0	0	0	0	0	0	0	0	0	0	0	7.6243
466	lcl|c226414_g7_i1|m.11461	0	0	0	0	0	0	0	0	0	0	0	0	0	0	0	0	0	0	0	0	0	0	0	0	0	0	0	0	0	0	0	7.6527	0	0
467	lcl|c210423_g1_i5|m.2178	0	0	13.9117	23.9345	27.343	26.2564	0	13.8485	25.3536	13.5795	0	0	13.5567	0	12.3299	23.6616	12.9372	42.2164	29.6881	14.6429	0	13.1621	0	13.2657	28.9739	27.5106	12.9695	26.5543	37.7845	13.8527	26.5714	54.9195	14.8283	26.1243
468	lcl|c210652_g1_i3|m.2226	0	0	0	0	0	0	0	0	0	0	0	0	0	0	0	0	0	0	0	0	41.6234	0	8.9836	0	0	95.9343	0	0	0	9.6614	0	0	0	0
469	lcl|c210724_g2_i1|m.2253	19.0638	14.185	7.3762	25.3808	28.9953	6.9608	0	0	3.3607	32.4002	16.7146	17.5078	3.594	0	9.8062	21.955	6.8595	7.4612	7.8705	11.6458	19.7772	20.9362	10.2445	7.0337	19.203	21.8797	10.3149	35.1987	23.3729	14.6898	3.5221	29.1191	7.8622	10.3886
470	lcl|c244023_g1_i1|m.31634	0	0	0	0.9648	0	2.1167	0	1.1164	1.022	0	0	0	1.0929	0	0	0	0	0	0	0	1.2028	0	0	1.0694	1.1679	0	0	0	0	0	1.071	0	0	0
471	lcl|c213355_g3_i1|m.3053	0	0	0	0	0	0	0	0	0	6.5029	0	3.1625	0	0	0	0	0	0	3.5542	3.506	0	0	0	3.1763	3.4687	0	3.1054	0	0	0	0	0	0	0
472	lcl|c211001_g1_i6|m.2326	0	0	3.5102	3.0196	3.4496	0	0	0	0	3.4264	3.1817	3.3327	3.4206	0	0	0	0	3.5507	0	0	11.2939	3.321	3.2501	3.3472	0	10.4122	0	0	0	0	3.3522	20.7859	0	0
473	lcl|c211022_g1_i7|m.2328	25.8724	19.2511	20.0211	17.2227	9.8377	0	0	0	9.1219	19.543	9.0736	9.5042	19.5101	0	8.8723	17.0264	0	0	10.6814	0	21.4724	9.4711	9.2688	0	31.2735	19.796	9.3325	9.5539	0	9.9681	28.6802	19.7594	32.0103	18.7985
474	lcl|c212784_g2_i1|m.2837	46.24	64.5117	26.8368	28.8572	72.5267	56.9821	36.8986	33.3934	61.1362	26.1959	48.6502	57.3287	39.2278	0	29.7316	39.9395	31.196	6.7866	7.1588	0	35.9777	38.086	18.6362	76.7719	34.9331	39.8025	31.2739	44.8221	30.3705	33.4037	44.851	33.1075	28.6049	100.792
475	lcl|c212839_g1_i3|m.2877	45.2766	50.5342	39.4165	39.5584	38.7359	55.7949	90.3247	98.0932	41.9038	51.3004	29.7729	49.8972	44.8123	0	46.5795	44.6942	42.7646	46.5162	63.0872	62.2323	70.4563	68.3697	85.1573	75.1725	75.2518	97.4333	48.9957	62.6976	101.109	52.3324	56.4642	45.3849	35.0112	49.346
476	lcl|c213311_g2_i3|m.3020	2.8646	3.1972	0	0	0	3.1379	0	3.31	3.03	0	0	0	0	0	0	0	0	0	0	0	0	0	0	0	0	9.8632	3.0999	3.1734	3.0104	0	0	0	3.5442	0
477	lcl|c213314_g8_i4|m.3021	8.8106	16.3895	10.227	14.6626	20.1008	16.085	12.499	16.9675	18.6383	13.3104	9.2698	12.9463	16.61	0	18.1282	8.6972	6.3404	6.8966	7.2749	7.1763	21.9367	16.1265	18.9385	19.5042	24.8497	40.448	19.0686	0	15.4315	16.9727	16.278	16.8222	14.5344	16.0041
478	lcl|c213496_g2_i3|m.3109	12.9362	14.4383	45.0474	25.834	14.7565	28.3403	27.5275	29.8951	68.4144	0	13.6105	0	14.6326	0	53.2337	12.7698	55.8558	15.189	0	15.805	48.3129	14.2067	41.7097	57.2743	15.6367	14.847	55.9951	42.9927	27.1889	29.9043	28.6802	29.6391	80.0257	0
479	lcl|c213576_g12_i2|m.3138	0	0	0	2.547	0	0	0	0	0	2.8902	0	0	0	0	0	5.036	0	0	0	0	3.1755	0	0	0	3.0833	2.9276	0	0	0	5.8966	0	2.9222	0	2.7801
480	lcl|c213677_g1_i4|m.3168	5.7903	12.9253	20.1633	8.6725	6.605	6.3426	18.4821	36.798	3.0622	16.4015	15.2302	9.5718	3.2748	0	11.9138	20.0052	12.5006	16.9965	7.1715	21.2231	18.0208	6.3589	15.5578	16.0226	20.9971	39.8732	15.6647	28.8654	0	10.0389	9.628	43.1162	3.582	18.932
481	lcl|c213837_g2_i3|m.3220	25.5346	18.9998	29.6396	29.7462	33.9824	32.632	27.1682	14.7524	40.5127	28.9318	58.2087	18.7603	28.8831	0	48.1605	37.8092	45.9388	19.9876	10.542	20.7983	58.2782	14.0212	9.1478	0	46.2978	53.7282	4.6053	33.0022	22.3616	44.2708	23.5882	43.8782	26.327	37.1061
482	lcl|c213419_g4_i1|m.3080	2.8849	0	6.6973	0	0	0	0	0	0	0	0	3.1793	3.2632	0	2.9679	2.8478	3.1141	0	0	0	10.7742	0	0	0	3.4871	0	6.2437	0	0	6.6689	0	0	3.5693	0
483	lcl|c213874_g5_i4|m.3261	0	0	0	0	0	0	0	0	0	3.5653	0	0	0	0	0	0	0	0	0	0	7.8345	6.9114	3.3819	0	0	0	0	0	0	0	3.4881	3.6048	0	0
484	lcl|c213886_g7_i2|m.3271	0	0	0	1.2056	0	0	0	0	0	0	0	38.5872	5.4628	0	0	0	0	19.8469	16.4494	17.7016	13.5276	18.5634	0	24.0552	26.2697	0	0	0	0	2.7911	0	1.3832	8.9629	6.5795
485	lcl|c214164_g1_i8|m.3381	0	2.5989	0	2.3251	0	0	0	0	0	2.6383	0	0	0	0	0	2.2986	2.5135	0	0	0	0	0	0	0	0	5.3449	0	0	0	0	0	0	2.8809	0
486	lcl|c214228_g4_i6|m.3409	0	0	1.9525	6.7184	5.7564	12.8979	23.2663	9.7182	0	0	0	7.4151	5.7081	0	1.7305	0	0	9.8752	4.1667	6.1654	4.1881	9.2365	1.8078	1.8619	2.0333	7.7223	14.5622	7.4538	0	0	0	7.708	6.2435	3.6666
487	lcl|c214229_g1_i1|m.3410	0	14.8711	41.2423	0	15.1988	48.6495	4.7254	0	0	55.3541	60.7464	68.5237	10.0474	16.6344	0	8.7683	23.9708	62.5769	137.52	0	27.645	4.8775	0	54.0751	26.8423	5.0973	9.6122	39.3611	0	35.934	88.6196	20.3516	5.495	53.2452
488	lcl|c214242_g1_i2|m.3413	100.134	136.597	96.8597	72.2119	25.3832	12.1873	207.161	141.415	76.4933	56.728	29.2648	110.353	81.8026	125.013	68.6769	71.3887	12.0099	130.636	227.372	27.1868	48.4778	42.7655	11.9577	104.677	47.0703	102.155	156.519	92.4415	35.0764	218.617	117.168	140.204	48.1793	84.8818
489	lcl|c213143_g1_i2|m.2979	0	0	12.7837	0	0	0	0	0	0	0	0	0	0	0	0	0	0	0	0	0	0	0	0	0	0	0	0	0	0	0	0	0	0	0
490	lcl|c214356_g7_i5|m.3463	9.819	0	11.3975	13.0726	3.7336	0	6.9648	0	6.9239	7.4169	3.4436	14.4281	7.4044	0	0	3.2309	0	0	4.0538	0	0	10.7834	17.5884	3.6228	7.9126	18.7823	0	0	0	3.7831	14.5129	22.4971	8.099	7.1344
491	lcl|c214397_g6_i4|m.3476	57.0803	99.102	103.066	44.33	94.0513	111.156	101.22	51.2985	33.5417	50.3023	33.3642	62.9055	28.6958	23.7542	26.099	37.564	20.5384	96.8075	62.8417	100.734	31.5819	69.6515	54.5309	56.16	53.6638	94.6278	68.6321	105.391	59.9847	21.9918	42.1834	72.6561	7.8469	82.9473
492	lcl|c214499_g2_i2|m.3512	0	21.0316	43.7455	28.2233	21.495	0	40.0979	0	0	21.3504	9.9128	31.1497	0	0	9.6928	55.8032	50.8514	0	0	0	93.8331	31.0412	20.2521	20.8571	79.7202	64.8804	30.5869	0	9.9011	54.4499	10.4442	21.5869	23.3138	0
493	lcl|c214530_g4_i1|m.3518	40.4122	45.1049	39.0908	47.0777	61.4652	59.0227	50.1638	7.7826	56.9931	45.7888	35.4322	29.6909	60.9489	0	13.8584	53.1898	29.0819	71.1747	41.7105	57.6035	41.9244	29.5875	28.9555	67.0961	40.7072	85.0327	58.309	52.2307	42.4685	54.4949	44.7981	23.1479	58.3328	66.0665
494	lcl|c213465_g6_i10|m.3092	0	0	0	0	0	0	0	0	0	0	0	0	4.9429	0	0	0	4.717	0	0	0	10.8801	0	4.6965	0	0	10.0307	0	0	0	0	0	0	5.4066	4.7626
495	lcl|c214817_g2_i1|m.3680	4.6306	0	0	0	0	5.0723	0	0	0	0	0	0	0	0	0	4.571	0	0	5.7352	0	5.7646	0	0	0	0	5.3145	0	5.1298	4.8662	0	5.1331	5.3047	0	5.0467
496	lcl|c214830_g3_i4|m.3696	0	11.2298	11.679	0	11.4773	0	0	0	21.2845	22.8002	21.1718	0	11.3809	0	20.702	9.932	0	23.6273	0	12.2928	12.5256	0	0	0	0	0	10.8879	0	10.5734	0	0	0	12.4484	10.9658
497	lcl|c214915_g6_i2|m.3733	14.2979	0	16.5964	14.2767	16.3098	31.3235	0	16.521	30.2464	16.2001	15.0431	0	32.3457	0	0	14.114	15.4338	33.5756	0	0	0	15.7021	0	0	34.5654	32.8196	0	15.8394	60.1017	0	47.5488	0	17.6899	31.1659
498	lcl|c215124_g2_i2|m.3835	0	0	0	0	0	0	10.2617	0	0	0	5.0737	0	0	0	4.9611	0	0	0	0	0	0	0	0	0	0	0	0	0	5.0677	0	0	5.5244	0	5.2558
499	lcl|c215266_g1_i3|m.3907	0	0	0	0	0	0	6.9929	0	0	0	6.915	0	7.4343	0	0	0	0	0	0	0	0	0	0	0	0	0	0	0	6.9068	7.5966	0	7.5293	0	0
500	lcl|c215450_g1_i1|m.4033	4.6411	12.4321	9.697	12.049	16.9414	8.1341	9.876	4.2902	5.8908	2.1034	6.8362	9.2066	7.3496	0	7.6395	18.3256	5.0098	6.5392	6.8979	13.6089	10.3999	8.1551	3.9904	5.1371	3.366	9.588	10.0447	9.2547	4.8773	12.8745	3.0869	5.3168	16.078	5.0582
501	lcl|c215492_g2_i9|m.4058	362.765	349.425	334.56	441.62	368.463	283.057	327.812	321.554	630.747	287.157	470.557	345.021	545.242	0	408.99	426.775	520.327	280.07	436.994	370.358	346.439	261.957	411.247	352.027	450.51	467.68	360.298	308.289	475.225	436.529	336.031	694.531	252.081	389.953
502	lcl|c215553_g1_i10|m.4084	10.0615	0	0	10.0466	11.4773	0	21.4103	34.8776	21.2845	0	10.5859	55.4414	34.1427	0	31.053	29.7961	21.7217	0	0	0	12.5256	0	21.6272	0	24.3238	23.0953	0	0	0	23.2589	11.1534	11.5263	24.8969	0
503	lcl|c215662_g1_i2|m.4137	26.8085	5.9843	0	5.3538	0	5.8732	0	0	5.6712	0	0	0	0	0	0	0	0	0	0	6.5508	0	0	34.5751	0	0	6.1537	0	5.9398	101.422	0	0	24.5692	0	0
504	lcl|c213534_g3_i4|m.3118	90.8688	69.7266	79.1077	85.0633	58.3062	43.5473	132.938	59.061	126.149	64.3489	59.7533	50.0711	64.2406	0	75.9554	128.944	177.785	66.6833	49.2388	55.5104	162.614	74.845	476.101	106.865	68.6491	130.364	79.8955	81.7909	59.6828	131.287	75.548	117.111	140.533	123.795
505	lcl|c215761_g1_i1|m.4176	4.553	10.1633	0	9.0924	0	0	4.8442	15.7826	4.8158	5.1587	0	5.0176	5.15	0	0	13.4832	9.8294	5.3458	0	0	5.668	5.0001	4.8933	5.0395	16.5103	0	4.9269	0	0	5.2625	5.0471	5.2158	0	4.9622
506	lcl|c215763_g2_i3|m.4184	9.1915	10.2588	7.1128	15.2965	17.4748	16.7804	13.0394	10.6206	6.4814	6.9429	3.2235	13.506	3.4656	0	3.152	6.0488	13.229	3.5974	7.5894	11.2299	11.4425	6.7295	9.8786	13.565	14.8137	24.6147	19.893	10.1825	12.8789	10.6239	20.3781	14.0396	15.1628	16.696
507	lcl|c215894_g1_i3|m.4266	0	0	0	0	23.5357	22.6005	0	0	21.8233	11.6887	10.8539	22.738	23.338	0	21.2261	30.5505	11.1358	0	0	0	0	11.3294	22.1748	11.4186	12.4698	0	0	0	32.5234	23.8477	11.4358	23.6362	12.7636	11.2434
508	lcl|c215953_g5_i6|m.4317	4.8948	5.4632	5.6817	0	0	0	15.6237	5.6558	5.1773	5.546	0	10.7886	5.5367	0	5.0356	9.6636	0	0	0	5.9803	6.0935	5.3755	10.5214	10.8357	5.9166	5.6178	0	0	15.4315	0	5.426	5.6074	12.112	5.3347
509	lcl|c215963_g8_i2|m.4326	88.5045	90.5499	154.099	500.783	159.851	250.446	321.736	281.23	148.221	242.342	364.711	308.866	141.823	0	303.504	189.293	175.15	346.391	182.696	360.441	183.633	323.99	150.608	187.761	142.641	177.761	239.436	147.07	279.024	153.445	220.747	160.534	164.252	273.301
510	lcl|c216038_g5_i1|m.4365	21.6606	24.1758	25.1428	21.6285	43.24	11.8634	17.2847	25.0284	45.8217	30.678	28.487	29.8389	36.7516	0	5.571	16.0365	23.3815	19.0745	26.8278	26.4643	33.7066	29.7349	40.7397	29.9691	32.728	24.86	29.2998	17.9969	28.4535	31.2951	24.0114	18.6106	6.6998	11.8037
511	lcl|c216057_g3_i1|m.4371	0	16.5761	30.1684	33.3665	21.1768	16.2682	15.8017	17.1607	19.636	0	39.0642	12.2754	16.7991	0	7.6395	25.6559	32.063	30.5163	0	27.2178	46.2219	24.4653	0	8.2193	44.8799	85.2264	28.1251	24.6792	31.2145	30.0405	28.8109	42.5345	32.1561	20.233
512	lcl|c216057_g3_i4|m.4374	29.4825	18.8034	34.2221	0	24.0222	18.4541	17.9249	19.4666	22.2744	62.0376	0	13.9248	19.0564	0	34.6638	29.1032	36.3712	34.6167	46.9486	0	0	27.7526	18.1065	9.3237	10.1821	0	31.9042	27.9952	35.4087	34.0769	32.6821	0	0	22.9516
513	lcl|c216124_g1_i3|m.4406	331.292	251.438	353.787	158.785	256.979	420.957	352.487	336.866	350.415	240.236	264.906	350.498	239.832	198.531	286.293	222.381	228.873	295.629	393.91	485.716	247.456	261.957	256.362	352.027	320.362	197.718	301.144	278.928	473.484	199.119	279.108	242.896	311.514	332.183
514	lcl|c216129_g1_i2|m.4409	109.997	33.4828	81.2512	79.8795	68.4413	87.6289	85.1158	92.4363	74.0386	67.9808	105.21	44.081	67.8665	0	72.0124	59.2267	97.1479	70.447	37.1556	48.8696	74.6923	54.9093	85.9782	22.1367	84.611	45.9072	97.3903	88.6229	73.56	57.7904	66.51	80.1892	61.8603	76.2895
515	lcl|c213742_g1_i10|m.3190	69.9982	290.184	127.68	99.8493	114.069	164.304	542.613	485.291	126.923	45.3206	63.1258	110.203	79.1775	0	41.15	78.9689	75.5595	176.118	322.016	122.174	87.141	109.819	53.7364	243.504	84.611	91.8144	216.423	166.168	346.783	161.813	77.595	68.7336	86.6045	76.2895
516	lcl|c216163_g1_i3|m.4416	3.2995	3.6827	7.6599	6.5892	3.7638	0	7.0212	3.8125	3.49	3.7385	10.4145	3.6362	0	0	3.3945	6.5141	7.1233	0	8.1732	0	12.3227	7.2471	7.0923	3.6521	11.9649	3.7869	3.5705	7.3105	10.4022	11.4411	7.3152	11.3397	8.1646	14.3842
517	lcl|c216317_g4_i4|m.4533	1.8607	0	0	0	0	2.0382	0	0	0	0	0	0	0	0	0	0	0	0	0	2.2733	0	2.0434	0	2.0595	0	0	0	4.1226	1.9554	0	0	0	0	0
518	lcl|c216367_g2_i7|m.4555	0	5.4063	0	0	0	0	0	2.7985	2.5617	2.7442	0	5.3382	0	0	2.4916	2.3908	2.6143	5.6874	5.9994	2.959	3.0151	2.6598	0	5.3615	0	0	0	2.683	2.5452	2.7994	2.6848	5.5491	0	2.6396
519	lcl|c216377_g1_i3|m.4559	26.4318	29.501	30.681	26.3926	45.2267	24.1275	23.4356	10.1805	9.3191	39.9311	13.9047	14.5646	9.966	0	0	4.3486	4.7553	31.0348	0	32.2935	10.9683	33.8657	4.7346	14.6282	26.6247	25.28	23.8358	9.7605	37.0356	35.6426	34.1837	10.0933	16.3512	9.6025
520	lcl|c216500_g6_i5|m.4616	27.2796	30.4474	39.5814	6.8098	38.8979	29.8818	21.7686	47.2817	21.6407	7.7273	21.5262	7.5159	15.4285	0	14.0323	20.1965	14.7235	24.0227	16.8936	16.6647	16.9803	7.4897	21.9892	22.6461	24.7309	7.8273	44.2807	22.6656	21.5008	7.8827	15.1201	0	33.7514	14.8657
521	lcl|c216645_g1_i1|m.4691	28.1027	10.4553	21.747	9.3537	21.3715	10.2611	4.9834	27.0602	9.9083	5.3069	4.9279	5.1618	5.298	0	0	4.6235	5.0559	16.4984	11.6022	5.7225	23.3234	25.719	10.0679	15.5529	11.3232	21.5025	15.2056	25.9438	49.2212	5.4137	25.9606	21.4628	11.5899	15.3143
522	lcl|c216705_g1_i4|m.4732	3.1773	0	3.6881	6.3452	0	0	0	0	0	0	0	3.5016	0	0	0	3.1364	0	0	0	0	0	6.9787	0	0	3.8406	10.9399	0	0	3.339	0	7.0443	3.6399	3.9311	3.4629
523	lcl|c216786_g2_i4|m.4765	0	0	0	0	0	0	0	0	0	3.3276	0	0	0	0	0	0	0	0	0	0	0	0	0	0	0	10.112	0	0	0	0	0	0	3.6336	0
524	lcl|c217013_g4_i3|m.4901	0	0	0	0	3.3381	0	0	0	0	3.3156	0	0	0	0	3.0105	0	0	3.4359	0	0	0	0	6.2901	0	0	10.0757	0	0	0	0	0	10.0571	10.8617	6.3787
525	lcl|c217098_g2_i2|m.4966	28.9342	10.7647	44.7809	0	0	10.5647	20.5235	44.5773	51.0072	10.9279	20.2949	21.258	21.819	0	0	0	0	0	0	70.7018	84.0472	21.1839	51.8286	0	34.9745	11.0693	0	0	40.542	33.4432	0	22.0978	23.8656	10.5116
526	lcl|c213743_g5_i1|m.3191	43.8161	19.5616	40.688	26.2507	49.9818	19.1983	27.9715	40.503	9.269	9.9291	18.44	67.6027	9.9124	0	36.0615	60.5534	18.9189	61.7358	21.7074	64.2398	0	67.3672	37.6733	48.4984	63.5557	20.1153	47.4152	38.8321	27.6274	40.5154	29.1428	40.1562	0	76.4066
527	lcl|c217182_g4_i3|m.5021	7.5812	25.3846	0	0	17.296	0	8.0662	0	0	0	0	8.3549	0	0	0	22.451	0	17.8029	9.3897	18.525	9.4379	16.6516	0	25.1741	0	17.402	16.4079	0	0	8.7626	25.2119	8.6849	0	0
528	lcl|c217182_g4_i2|m.5020	13.8132	0	0	27.5855	31.5139	0	14.6969	0	0	46.9529	0	15.2229	0	0	0	0	0	0	17.1084	33.7531	0	30.3397	0	0	33.3937	0	29.8957	0	0	15.9658	0	15.8243	0	15.0547
529	lcl|c217312_g3_i2|m.5103	0	0	0	0	0	0	7.9919	0	0	8.5107	7.9028	0	0	0	0	0	0	0	0	0	9.3509	0	0	0	9.0794	17.2416	0	0	0	0	0	17.2098	0	0
530	lcl|c217341_g1_i2|m.5116	149.147	71.3424	86.5617	170.201	133.677	221.721	79.344	73.8584	428.193	84.4947	168.129	117.405	180.756	0	295.917	94.6465	68.9983	200.137	26.3894	195.239	79.5741	105.297	148.846	23.5835	103.019	122.269	484.193	165.227	358.253	98.5081	70.8571	73.226	39.5421	139.33
531	lcl|c217405_g1_i6|m.5180	0	0	1.8088	1.556	1.7776	0	1.658	0	3.2964	1.7656	1.6395	0	0	0	0	0	0	0	0	0	1.9399	5.134	0	1.7248	0	3.5769	1.6863	3.4526	0	1.8011	5.1822	1.7851	0	1.6983
532	lcl|c217427_g4_i1|m.5185	6.936	23.2242	16.1021	13.8514	31.648	37.988	14.7594	0	7.3363	7.8588	14.595	15.2877	39.2278	0	21.4067	13.6935	14.9741	16.2877	8.5906	8.4742	25.9039	15.2344	14.909	15.3544	8.3839	31.842	15.0115	30.7352	21.8668	0	23.0662	7.9458	42.9074	15.1188
533	lcl|c217466_g1_i3|m.5215	557.287	187.067	627.422	414.208	234.208	220.311	441.36	440.587	465.358	555.468	608.377	374.037	502.398	1537.98	504.351	500.483	909.128	506.741	503.4	455.624	469.467	478.572	495.37	324.653	445.707	658.839	548.651	366.709	180.537	348.704	608.478	787.226	575.444	584.54
534	lcl|c230117_g1_i3|m.14970	6.0146	13.4261	13.963	0	6.861	6.5883	12.7988	13.8996	12.7236	27.2592	25.3124	13.2568	34.0167	0	6.1877	11.8745	6.4925	7.062	7.4494	0	0	13.2106	45.2496	6.6573	0	20.7091	6.5087	6.6631	6.3207	20.8557	26.6695	41.3416	7.4415	19.6655
535	lcl|c217585_g1_i2|m.5268	6.7633	22.646	7.8506	6.7533	0	7.4085	14.392	0	0	22.9894	0	7.4535	0	0	0	13.3526	14.6013	0	16.7534	24.7896	16.8393	29.7103	0	0	24.5257	15.5246	7.3189	44.955	14.2149	7.8173	7.4973	7.748	8.3678	36.8559
536	lcl|c217591_g3_i2|m.5272	8.4018	0	0	0	0	0	8.9394	9.7082	0	0	0	0	9.5036	0	0	0	0	0	20.8123	20.5303	0	0	0	9.2997	10.1558	0	0	0	0	0	9.3137	9.6251	0	9.157
537	lcl|c217655_g1_i10|m.5304	0	0	0	0	0	0	0	0	0	0	8.7496	0	0	0	17.1108	8.2091	17.9536	0	0	0	10.3528	9.1329	0	0	0	0	0	0	0	0	0	9.5268	0	0
538	lcl|c217670_g3_i4|m.5309	3.8083	0	0	0	0	0	0	0	0	0	4.0068	0	0	0	3.9179	0	0	0	0	0	0	0	0	0	0	13.1125	0	0	0	0	0	4.3628	4.7118	0
539	lcl|c213826_g1_i1|m.3216	4.8801	10.8936	5.6646	4.8729	11.1337	5.3456	5.1923	0	0	5.5294	5.1345	0	5.5201	0	0	9.6347	0	0	0	0	6.0753	0	0	0	5.8989	5.601	0	0	5.1284	5.6406	10.8195	11.1812	0	0
540	lcl|c217816_g7_i5|m.5372	0	0	5.3146	13.7153	10.4456	0	0	0	0	0	0	0	5.1789	0	0	0	0	10.7517	5.6708	5.5939	0	5.0282	4.9208	0	0	10.5097	0	5.0722	4.8115	0	0	5.2451	0	0
541	lcl|c217854_g5_i6|m.5415	6.1508	0	7.1396	0	0	0	13.0886	0	0	13.9382	6.4714	6.7785	0	0	0	24.2867	0	0	0	7.5148	15.3143	20.2646	6.6106	6.8081	0	7.0593	0	0	0	28.4373	13.6366	0	15.22	6.7036
542	lcl|c217988_g6_i3|m.5463	75.3738	21.0316	43.7455	103.486	32.2426	41.2818	45.1101	48.9899	39.8622	48.0385	49.5641	57.1078	53.2863	70.576	43.6178	41.8524	40.6811	55.3124	29.1733	0	17.5937	10.3471	101.26	83.4285	125.275	129.761	25.4891	57.4064	79.2091	103.455	120.109	48.5704	29.1423	87.2824
543	lcl|c218196_g3_i9|m.5616	4.1161	9.188	4.7778	0	14.0858	4.5087	4.3794	9.5121	8.7073	0	4.3306	13.6083	4.6558	0	12.7035	4.0631	0	4.8329	5.098	5.0289	15.3723	4.5203	17.695	18.2236	0	23.6202	0	18.2393	4.3255	0	9.1255	14.1459	5.0925	8.972
544	lcl|c218214_g1_i2|m.5634	7.8996	5.878	9.1696	0	3.0037	5.7688	2.8017	3.0426	2.7852	8.9506	13.8523	0	2.9785	0	2.709	2.5993	5.6848	12.3671	9.7841	3.2172	9.8343	8.6755	5.6601	0	9.5488	18.133	2.8495	14.5856	16.6032	3.0436	23.3519	9.0497	3.2579	5.7398
545	lcl|c218357_g3_i2|m.5741	0	7.7745	8.0854	6.9553	7.9458	7.6301	7.4113	0	7.3677	7.8924	14.6574	7.6765	0	0	14.3321	6.876	7.519	0	17.2546	0	8.6715	15.2995	0	15.42	8.4198	0	0	7.7166	7.3201	32.2046	15.4432	0	0	7.5917
546	lcl|c218374_g1_i3|m.5753	5.9925	0	0	5.9836	0	9.8462	0	0	0	16.9744	9.4573	3.302	3.3892	0	6.1649	5.9154	0	0	0	3.6607	3.73	6.581	0	0	0	41.2658	6.4847	3.3193	0	0	6.6429	13.7299	0	9.7966
547	lcl|c218647_g3_i1|m.5884	36.5257	20.3835	37.0979	45.5895	31.2491	35.0086	48.578	84.4096	43.4632	10.3463	9.6074	25.1583	30.9866	0	28.1825	40.5628	24.6423	32.1649	39.5841	22.313	39.7871	35.0989	49.0702	30.3217	60.7073	31.4406	39.526	50.5796	28.7882	36.9405	45.551	31.3826	28.2444	9.9521
548	lcl|c218730_g2_i11|m.5922	0	0	0	817.389	528.874	841.14	732.232	1473.23	750.916	311.906	350.606	534.899	376.935	0	298.108	193.079	132.937	731.501	1139.49	0	0	0	62.2865	384.883	227.671	58.2001	290.055	80.2529	487.224	418.659	104.396	174.278	233.035	165.802
549	lcl|c218844_g4_i7|m.5991	5.3093	0	0	0	6.0564	0	5.649	0	0	0	5.5861	5.8511	6.0056	0	0	5.241	0	0	0	0	0	0	0	0	0	24.3742	0	0	0	18.4101	5.8855	6.0823	13.1378	0
550	lcl|c213850_g3_i2|m.3229	4.4053	0	20.454	0	0	4.8255	0	0	0	0	0	4.8549	0	0	0	4.3486	0	0	0	0	5.4842	4.838	28.4077	0	0	5.056	0	0	4.6295	0	4.8834	20.1866	5.4504	0
551	lcl|c218881_g3_i2|m.6022	15.377	17.1625	8.9245	23.0313	17.5408	16.8438	16.3607	8.8839	16.2645	8.7114	8.0892	16.9462	17.3934	0	15.8194	15.1792	16.5987	27.0822	28.5678	9.3936	19.1428	8.4436	24.7897	25.5303	27.8806	8.8241	8.32	17.0348	48.4782	26.6599	8.5229	44.0392	28.5375	16.759
552	lcl|c218968_g13_i5|m.6107	0	4.7624	9.9057	8.5212	9.7347	4.6739	4.5399	9.8607	4.5132	0	4.4893	4.7024	4.8265	0	0	4.212	0	5.01	10.5696	5.2132	0	4.686	0	4.7229	5.1577	0	4.6174	9.4539	0	4.9319	9.46	0	10.5584	9.3008
553	lcl|c219160_g4_i1|m.6235	0	0	0	0	0	0	0	0	9.3953	0	0	4.8946	0	0	4.5691	0	0	0	0	5.4263	0	4.8775	0	0	5.3685	0	0	0	0	5.1334	0	0	5.495	0
554	lcl|c219237_g2_i4|m.6297	0	0	0	0	0	3.9765	0	4.1946	3.8397	4.1132	3.8194	0	0	0	0	0	0	0	4.4962	4.4353	4.5192	0	0	0	13.1641	0	0	0	7.6298	4.1959	0	8.3174	4.4914	3.9565
555	lcl|c219327_g1_i2|m.6330	22.534	16.7671	17.4377	30.0008	17.1366	16.4556	15.9837	34.7169	15.8898	17.0213	15.8057	16.5558	16.9927	0	15.4549	29.6588	24.3243	17.6388	18.6064	9.1771	56.1053	16.4981	24.2185	24.942	18.1588	25.8625	32.5133	16.6423	15.7871	26.0456	16.653	17.2098	65.0531	16.3729
556	lcl|c219462_g5_i7|m.6389	6.7076	0	0	0	15.3031	7.3475	0	0	0	0	14.1146	14.7844	0	0	13.8013	26.4855	7.2406	0	0	0	33.4015	7.3664	14.4182	0	16.2159	30.7937	0	22.2925	0	7.753	22.3069	61.4737	8.299	7.3105
557	lcl|c219473_g3_i1|m.6396	3.3993	0	3.9458	5.0914	0	0	1.8084	0	5.3932	1.9258	3.5765	1.8731	7.6901	0	0	0	3.6694	3.9913	0	2.0766	4.2318	5.5997	0	3.7625	8.2178	13.6549	0	1.8829	0	1.9645	15.0728	5.8413	6.3086	1.8524
558	lcl|c219495_g3_i10|m.6406	13.1803	24.5179	15.2991	4.3869	20.0466	28.875	9.349	20.3061	23.2351	24.8897	23.1121	19.3671	9.9391	0	0	13.0107	18.9699	41.2681	38.0904	5.3677	21.8775	24.1246	0	14.5887	21.2424	20.1695	14.2629	34.0696	41.5528	15.2342	14.6107	10.0661	0	33.518
559	lcl|c219546_g2_i1|m.6439	129.167	116.705	149.931	98.2668	91.212	168.438	104.709	120.821	130.116	146.351	161.785	101.677	118.275	0	50.6222	72.86	92.9525	173.326	213.306	112.723	153.143	128.343	79.3271	163.394	141.262	282.373	86.5283	170.348	239.159	63.9838	102.275	133.879	114.15	100.554
560	lcl|c219556_g4_i5|m.6447	30.5617	22.7404	17.7374	15.2582	29.0519	33.477	27.0974	11.7712	10.7753	28.8565	21.4365	28.0672	5.7616	0	10.4804	25.1405	32.9898	17.942	31.5436	12.4465	12.6821	16.7817	5.4744	22.5518	24.6279	40.922	5.512	22.5711	26.764	23.5496	22.5857	40.8464	31.5101	11.1028
561	lcl|c213850_g4_i1|m.3231	0	0	4.8513	0	0	0	4.4468	0	0	0	0	9.2118	0	0	0	0	0	0	0	5.1062	0	0	4.4918	0	0	0	0	0	0	0	0	0	0	9.11
562	lcl|c219662_g1_i2|m.6507	215.155	203.754	166.495	188.795	237.993	299.954	374.595	361.611	241.366	251.167	212.65	222.741	235.994	0	214.638	251.003	274.475	321.52	298.781	191.178	349.012	221.965	280.289	303.096	236.427	291.832	253.994	404.475	287.767	188.397	252.96	216.602	258.131	291.339
563	lcl|c219710_g2_i1|m.6538	39.6342	33.1774	69.0088	113.78	50.8629	37.988	21.0849	22.8983	36.6817	39.2939	26.0626	38.2192	22.4159	111.334	15.2905	68.4677	26.7395	46.5364	24.5446	72.6359	49.3408	38.086	42.5971	49.3534	11.9771	102.349	37.5286	32.9305	67.6829	40.0844	54.9196	85.1336	30.6481	26.9978
564	lcl|c214653_g2_i1|m.3571	0	0	0	9.0671	5.1792	0	0	0	0	0	0	0	0	0	4.6709	0	0	0	0	0	5.6522	0	0	0	0	10.4218	0	0	0	5.2478	0	0	0	0
565	lcl|c219733_g1_i5|m.6547	15.6727	34.9852	27.2884	39.1237	44.6952	34.3353	41.6883	18.1095	41.4433	44.3945	32.9792	17.2721	17.7279	0	40.3091	15.4711	16.9179	55.206	48.5286	9.5742	19.511	43.0299	25.2664	8.6738	18.9445	17.9877	8.48	26.0436	41.1754	63.4028	60.8076	35.9089	29.0863	8.5406
566	lcl|c219829_g2_i1|m.6600	0	6.7882	0	0	6.9378	6.6621	0	14.0551	12.866	0	0	6.7026	20.6385	0	0	0	0	0	0	0	0	0	6.5366	6.7319	0	6.9803	13.163	6.7377	6.3914	7.0297	0	0	7.5248	0
567	lcl|c219883_g1_i2|m.6624	245.41	192.143	199.828	208.472	200.556	252.77	187.063	253.94	275.072	203.357	196.541	217.978	227.874	301.812	308.995	231.405	256.999	202.133	254.05	313.259	223.433	213.196	173.212	210.821	203.664	290.067	194.221	211.002	204.008	220.149	207.078	281.138	163.144	243.514
568	lcl|c220306_g1_i5|m.6860	0	8.5813	8.9245	0	17.5408	0	0	0	0	8.7114	0	33.8925	0	0	0	0	0	27.0822	0	0	0	16.8872	0	0	0	0	0	0	8.0797	8.8866	17.0458	17.6157	0	16.759
569	lcl|c220360_g1_i5|m.6901	5.5441	0	12.8707	0	0	6.0729	0	12.8122	0	0	5.8331	12.2197	0	0	0	5.4728	5.9845	0	0	6.7736	13.8037	12.1772	5.9585	6.1365	0	19.089	5.9995	6.1418	5.8262	6.4081	6.1458	6.3512	0	0
570	lcl|c220409_g3_i3|m.6926	3.5434	0	0	0	0	0	3.7701	0	0	0	3.7281	3.905	0	0	0	3.4978	0	0	0	0	0	0	3.8083	0	4.2831	12.2003	0	0	0	0	3.9279	4.0593	0	3.8619
571	lcl|c220464_g2_i2|m.6955	0	0	16.0338	41.3782	31.5139	15.1308	0	0	14.6105	0	14.5332	0	0	0	0	13.6355	14.9107	16.2187	0	0	0	30.3397	0	0	0	15.8535	29.8957	15.3025	0	0	15.3123	0	17.0902	0
572	lcl|c220629_g1_i1|m.7036	0	0	0	4.745	0	5.2054	5.0561	5.4909	10.0527	10.7686	4.9998	0	5.3752	0	0	0	0	0	0	0	5.9159	5.2188	5.1073	0	0	0	0	5.2644	0	5.4926	5.2678	0	5.8794	10.3583
573	lcl|c183284_g1_i1|m.675	0	0	0	16.9536	9.684	0	9.0325	0	0	19.2376	17.8637	9.3557	9.6026	0	0	0	0	0	0	0	0	0	9.124	0	0	9.7433	9.1867	0	0	9.8123	0	0	10.5034	0
574	lcl|c213888_g2_i1|m.3274	7.2443	0	8.4089	7.2335	0	0	0	0	0	8.2081	30.4874	0	0	0	0	0	7.8198	0	8.9724	0	0	0	0	0	0	0	0	8.0253	7.6129	8.3732	16.0609	0	17.9257	7.8954
575	lcl|c220633_g2_i2|m.7049	0	2.7775	0	2.4848	2.8387	0	5.2954	0	5.2643	0	2.6182	0	0	0	0	2.4565	2.6862	2.9218	0	3.0404	0	2.7329	0	0	0	2.8561	0	2.7568	0	0	0	0	3.0788	0
576	lcl|c220640_g5_i2|m.7065	182.231	146.894	148.852	195.44	103.937	125.683	251.338	120.88	249.861	175.887	166.876	130.167	87.7955	25.2788	187.475	129.918	131.14	162.456	192.266	111.322	184.849	137.125	137.823	134.47	175.403	166.544	109.556	175.709	202.143	159.923	97.2634	170.103	196.237	125.051
577	lcl|c220657_g1_i4|m.7075	8.9805	5.0117	5.2121	4.4836	10.2442	4.9186	9.555	5.1884	9.4989	5.0876	14.1729	0	5.0791	0	0	8.865	4.847	0	5.5614	0	5.5899	0	0	4.9701	5.4276	15.4605	9.7182	14.9231	4.7187	10.38	0	15.4319	0	0
578	lcl|c220657_g1_i5|m.7076	0	0	0	5.5548	6.3458	6.0936	0	0	0	0	0	0	0	0	0	0	6.005	0	0	0	6.9254	0	0	0	0	0	0	0	0	0	0	0	6.8828	0
579	lcl|c220808_g2_i6|m.7171	31.014	23.0769	31.9999	30.9681	43.24	22.6483	25.6652	35.8362	51.0287	39.0447	25.3793	34.1791	0	0	10.6355	23.8117	7.4396	24.2767	29.8764	29.4716	17.1597	41.6289	11.1108	15.257	20.8269	39.5501	14.9162	19.0876	47.0775	23.8981	22.9199	31.5816	8.527	41.3129
580	lcl|c220897_g5_i4|m.7224	0	0	0	8.3038	9.4863	9.1094	8.8481	0	0	18.845	8.7496	9.1648	9.4067	0	8.5554	8.2091	0	0	0	10.1604	10.3528	9.1329	0	0	0	9.5445	0	9.2127	0	0	0	9.5268	0	18.1271
581	lcl|c220945_g4_i2|m.7256	3.2534	7.2624	3.7764	0	3.7112	0	6.9231	3.7593	3.4412	0	3.423	3.5854	0	0	0	0	0	0	0	11.9248	12.1505	0	0	7.2022	27.5281	22.4038	7.0413	14.4167	6.8379	7.5208	14.426	0	4.0252	0
582	lcl|c220947_g2_i1|m.7263	4.4413	0	0	4.4347	0	4.865	4.7254	0	9.3953	5.0322	4.6728	0	5.0237	0	0	4.3842	0	5.2147	5.5008	5.4263	5.529	0	0	4.9159	5.3685	5.0973	0	9.8403	9.3346	0	4.9233	0	5.495	4.8405
583	lcl|c220977_g2_i3|m.7288	0	4.8128	0	0	4.9188	4.7234	4.5879	0	4.561	4.8857	0	4.7521	0	0	0	4.2566	0	0	5.3407	5.2683	10.7362	4.7356	9.2688	4.7729	0	0	0	0	0	0	4.78	0	5.335	4.6996
584	lcl|c221039_g1_i2|m.7339	52.8227	101.068	78.833	67.8143	68.8637	66.1273	64.2309	104.633	71.8351	51.3004	71.4549	41.581	42.6784	0	62.1059	74.4903	57.0194	70.8818	74.77	64.5372	56.365	58.0106	89.2124	66.82	82.0928	121.25	48.9957	75.2371	95.161	95.9428	50.1904	86.4473	56.018	49.346
585	lcl|c221054_g2_i5|m.7352	0	0	0	0	0	0	0	0	0	0	0	5.3701	0	0	0	2.4051	0	0	0	0	0	2.6757	0	0	0	0	2.6365	0	0	0	0	8.3734	3.0144	2.6554
586	lcl|c213946_g11_i4|m.3301	6.0035	6.7007	24.3903	23.9786	23.9691	9.8643	9.5814	17.3424	15.8752	10.2034	12.6329	19.8486	13.5816	0	3.0881	14.8158	35.6428	7.049	11.1535	7.3349	22.4214	19.7795	32.2616	3.3225	29.0273	31.0064	9.745	13.3016	0	38.1651	19.9653	17.1939	11.1417	19.6293
587	lcl|c221077_g4_i2|m.7375	0	3.8707	0	0	0	0	0	4.0072	0	0	3.6488	7.6438	0	0	3.5678	0	0	0	0	4.2371	0	3.8086	3.7272	0	0	0	0	0	0	0	0	0	4.2907	0
588	lcl|c221101_g1_i4|m.7399	3.0467	3.4004	0	3.0421	0	6.6745	3.2416	0	0	0	0	0	0	0	0	0	0	0	0	0	3.7928	3.3459	3.2744	3.3722	3.6827	3.4967	0	3.3751	6.4034	3.5214	0	0	11.3083	0
589	lcl|c221225_g1_i6|m.7493	55.149	68.3921	71.1275	67.3045	76.8892	87.2582	97.7952	84.9649	58.3323	76.372	77.3647	67.5301	83.1747	0	69.3439	72.5861	85.9885	79.1425	106.252	67.3794	68.6551	47.1064	79.0289	61.0424	81.4756	70.3278	59.679	67.8831	64.3947	77.9084	88.305	70.1978	75.8138	86.8192
590	lcl|c221281_g1_i1|m.7531	26.7206	9.9411	41.355	44.4684	71.1216	19.513	132.674	41.167	9.421	20.1837	18.7423	39.2634	70.5243	0	36.6527	96.7153	67.3016	31.3739	55.1582	10.8822	55.441	58.6899	76.5817	88.7282	64.5976	51.1125	67.4695	59.203	18.7202	61.7694	39.4941	40.8145	66.1196	29.1222
591	lcl|c221356_g3_i2|m.7588	9.2218	0	8.0283	11.5102	21.039	37.8806	53.9649	31.967	2.4385	7.8365	9.7025	25.4074	44.3324	8.6348	7.1154	9.1032	9.9545	27.0694	31.4097	25.3507	34.4409	35.4464	9.9112	17.8628	11.147	29.1059	17.4638	20.4322	7.2683	23.9826	20.4453	26.4111	34.2288	30.152
592	lcl|c221374_g4_i3|m.7595	5.7596	6.4284	0	11.5021	6.57	0	18.3841	19.9653	6.092	6.5258	6.0598	6.3474	0	0	5.9253	17.0564	6.2172	13.5252	7.1335	7.0369	14.3402	12.6505	0	6.3751	6.9619	19.8309	12.4653	12.7611	6.0526	6.6571	6.3846	6.5981	7.126	0
593	lcl|c221440_g2_i5|m.7632	9.0053	5.0255	15.6795	4.496	0	4.9321	4.7907	5.2027	0	15.3051	4.7373	4.9622	10.1862	0	9.2644	13.3342	14.5811	21.1471	0	5.5012	22.4214	4.9449	9.6785	0	16.3279	10.3355	0	19.9524	14.1953	15.613	14.9739	5.1582	16.7125	9.8147
594	lcl|c221441_g1_i5|m.7633	8.7475	13.0177	6.7692	8.7346	6.6523	3.194	9.3072	6.7384	6.1683	9.9113	9.2035	0	13.1929	0	5.9995	11.5134	12.59	3.4236	0	7.125	21.7797	3.2022	9.4015	12.9098	7.0491	33.4654	9.4661	6.4604	12.2569	6.7405	6.4646	20.0422	7.2152	19.0675
595	lcl|c221482_g1_i3|m.7664	13.9313	3.8872	20.2136	17.3883	3.9729	7.6301	7.4113	8.0487	11.0516	7.8924	14.6574	7.6765	23.6373	0	17.9152	6.876	7.519	4.0893	8.6273	4.2552	0	11.4746	14.9727	7.71	16.8396	11.9918	18.8445	11.5749	21.9602	8.0511	15.4432	15.9595	12.9272	15.1834
596	lcl|c221495_g1_i4|m.7674	0	0	0	10.433	0	0	0	0	0	0	0	0	0	0	0	0	0	0	0	0	0	0	0	0	0	0	5.6534	0	0	0	0	0	0	0
597	lcl|c214028_g2_i1|m.3329	4.6174	5.1536	5.3598	4.6106	5.2672	5.0579	0	0	0	10.4635	4.8581	0	0	0	0	4.558	0	10.8431	5.719	0	0	5.0709	0	0	5.5814	5.2995	0	0	14.5572	0	5.1186	5.2897	0	5.0324
598	lcl|c221497_g1_i2|m.7677	6.1508	13.73	0	0	14.0326	0	6.5443	14.2143	0	0	12.9428	6.7785	0	0	12.6556	6.0717	19.9184	7.2219	7.6181	0	15.3143	6.7549	19.8318	6.8081	7.4348	7.0593	6.656	0	25.8551	0	20.455	14.0925	7.61	13.4072
599	lcl|c221524_g4_i2|m.7708	11.6426	12.9945	0	5.8127	0	0	0	20.1792	240.134	178.085	177.617	160.384	138.278	0	5.9888	0	12.5676	328.082	519.117	0	0	0	143.898	180.414	211.096	140.304	163.786	58.0401	116.232	201.854	103.249	0	7.2023	0
600	lcl|c221524_g4_i1|m.7707	15.0458	11.1953	23.2861	5.0078	17.163	32.9619	0	17.3851	0	0	0	0	5.6729	0	5.1596	14.8522	0	41.2205	24.8466	269.61	0	49.5704	0	49.9608	0	0	0	94.4515	0	0	33.3573	11.4908	6.2051	262.369
601	lcl|c221583_g3_i2|m.7741	88.0025	123.844	88.8259	64.9489	152.761	129.926	126.2	97.2642	76.8939	134.393	209.333	109.633	103.871	71.6529	90.5347	113.309	90.864	112.313	90.0399	84.1451	119.081	58.8277	94.5811	118.582	106.374	114.175	86.9502	97.4904	124.647	141.519	152.692	135.881	99.4122	141.783
602	lcl|c221608_g1_i1|m.7755	60.1663	21.3668	19.0469	57.3464	21.8377	20.9699	66.9251	31.6005	28.9269	24.7894	23.019	33.1532	43.3085	0	149.117	37.7951	70.8506	22.4776	27.0979	23.3893	71.4965	30.0343	102.875	18.1625	39.669	72.1922	29.5947	18.1781	34.4879	28.4492	24.2531	43.8619	60.9054	26.8257
603	lcl|c221672_g4_i6|m.7784	0	0	4.5922	3.9503	4.5129	8.6672	0	0	4.1846	4.4826	4.1624	0	0	0	8.1401	7.8106	4.2705	4.6452	4.9	0	4.9251	0	4.252	4.379	0	0	8.5624	8.7655	4.1575	4.5727	4.3856	4.5322	9.7895	17.2471
604	lcl|c221676_g4_i4|m.7786	50.7775	34.0043	70.7287	35.4916	28.9614	61.1832	43.2208	23.469	21.4834	34.5199	21.3697	27.9798	17.2309	0	57.4625	45.1119	32.887	11.924	12.5781	24.8154	56.8918	27.8823	43.6587	11.2408	42.9645	87.4167	16.4845	50.6269	37.3529	46.9525	39.4018	81.4382	69.1063	55.3413
605	lcl|c225423_g3_i2|m.10600	0	0	0	0	0	0	0	0	0	2.4016	0	4.6718	0	0	0	2.0923	0	2.4887	2.6252	0	7.916	0	0	2.3461	5.1241	19.4613	2.2937	2.3481	2.2274	0	4.6992	4.8563	0	9.2403
606	lcl|c227927_g4_i1|m.12894	9.2349	5.1536	10.7195	13.8318	0	15.1737	0	10.6708	9.7679	15.6953	9.7163	10.1773	5.223	0	4.7503	13.6741	4.9843	10.8431	5.719	16.9244	5.7483	10.1419	9.9253	0	16.7441	15.8985	9.9935	15.3458	4.8524	5.337	5.1186	21.1588	11.4258	10.0649
607	lcl|c228653_g2_i5|m.13498	6.7076	0	3.893	0	0	0	3.5684	11.6259	3.5474	3.8	0	3.6961	0	0	3.4503	3.3107	3.6203	3.9379	4.1539	8.1952	0	0	7.2091	0	4.054	3.8492	3.6293	3.7154	3.5245	0	3.7178	7.6842	4.1495	3.6553
608	lcl|c221802_g2_i1|m.7868	4.766	0	5.5321	9.5178	5.4366	0	0	0	10.0821	5.4	0	10.5047	0	0	0	4.7047	0	0	0	0	11.8663	0	5.1222	0	11.5218	10.9399	0	5.2798	0	5.5087	0	5.4598	0	5.1943
609	lcl|c226454_g2_i2|m.11493	3.7643	0	0	0	0	8.2468	0	0	7.9632	0	0	0	0	0	0	0	0	0	0	0	0	0	0	0	9.1004	0	0	0	0	0	0	0	9.3148	0
610	lcl|c242662_g1_i1|m.30100	0	7.2192	7.5079	0	0	0	0	0	0	0	0	0	0	0	0	0	0	0	0	0	0	0	6.9516	0	0	0	6.9994	0	0	0	0	7.4098	0	7.0494
611	lcl|c217326_g3_i1|m.5105	6.7493	3.7665	3.9172	3.3697	7.6991	0	7.1811	3.8994	3.5694	7.6473	3.5506	7.4381	3.8172	0	3.4718	3.3312	3.6428	7.9247	4.1797	8.2461	8.4022	7.4122	3.6269	7.4706	8.1583	7.7462	7.3037	7.477	3.5464	7.8011	3.7409	3.866	4.1753	7.3559
612	lcl|c221883_g2_i12|m.7953	19.0918	45.281	33.2414	45.2758	10.8891	15.6847	40.6263	24.8177	42.9117	21.6318	32.6412	36.8202	29.6936	8.9383	19.6411	40.0481	38.6411	16.8124	8.8673	14.5786	44.5638	26.2085	15.3892	44.9054	40.3854	52.0405	28.4075	34.3689	22.5711	44.1339	13.2273	65.6139	29.5263	36.4134
613	lcl|c222140_g4_i1|m.8123	0	1.6767	3.4875	0	0	1.6456	3.1967	0	7.9449	0	1.5806	0	1.6993	0	1.5455	1.4829	0	0	0	0	0	0	0	1.6628	0	1.7242	0	1.6642	0	0	0	3.442	1.8587	1.6373
614	lcl|c222155_g2_i2|m.8140	0	0	0	10.3009	0	0	0	0	0	0	0	0	35.0071	0	42.4522	0	167.037	0	0	0	38.528	0	0	0	0	35.52	66.9815	0	0	11.9238	0	0	25.5272	0
615	lcl|c222187_g6_i2|m.8154	8.253	9.2113	9.5797	0	0	9.0402	0	0	0	0	0	0	0	0	0	0	0	0	5.1109	0	0	0	0	0	0	9.472	0	0	4.3365	0	0	4.7272	0	0
616	lcl|c214032_g1_i4|m.3331	394.835	406.784	423.054	495.339	623.623	332.69	560.125	596.602	728.167	596.486	607.145	580.172	767.256	189.591	833.223	519.674	721.268	736.995	539.18	791.626	529.341	611.505	968.39	739.586	538.447	697.162	471.089	650.497	670.264	514.873	718.253	823.451	576.185	496.525
617	lcl|c222208_g5_i7|m.8170	3.1588	3.5256	11	3.1542	3.6033	6.9203	10.0828	10.9499	13.3647	7.1582	6.647	10.4436	7.1461	0	6.4995	21.8274	10.2294	0	0	7.7187	39.3244	10.4072	6.7899	17.482	7.6365	10.8763	10.2549	3.4994	3.3196	18.2555	17.5083	18.0936	19.5412	3.4427
618	lcl|c222225_g1_i1|m.8189	4.3235	0	0	0	4.9319	4.7359	0	0	0	4.8987	4.5489	0	4.8905	0	0	0	0	5.0764	0	0	0	0	0	0	0	0	4.6786	4.7896	4.5435	0	4.7927	9.9059	0	9.4242
619	lcl|c222261_g1_i2|m.8225	0	0	0	0	0	0	0	0	0	0	3.6722	0	0	0	0	0	0	0	0	0	4.3451	3.8331	0	0	4.2189	0	0	0	0	0	0	0	0	0
620	lcl|c222306_g9_i1|m.8237	39.7551	29.581	38.4551	6.616	52.9075	58.063	28.1989	22.9682	28.0332	67.5663	111.539	58.4163	119.916	173.714	74.9816	19.6218	57.2181	7.7797	41.0323	16.1905	82.4854	58.2128	71.2117	51.3373	40.0453	182.509	50.1907	51.3815	0	30.6336	73.4494	174.582	73.7798	50.5495
621	lcl|c222339_g3_i2|m.8253	2.3865	2.6636	11.0805	2.3829	5.4446	2.6141	5.0783	2.7575	2.5242	2.704	2.5109	2.63	2.6994	0	0	2.3558	2.5761	5.6041	2.9558	2.9157	2.9709	2.6209	0	2.6415	2.8847	2.739	2.5825	2.6438	5.0158	2.7584	2.6455	0	2.9526	2.601
622	lcl|c222399_g1_i2|m.8304	284.198	214.576	213.456	425.665	333.724	100.717	124.509	125.559	132.619	104.179	61.5612	396.107	302.557	31.3068	386.968	165.025	261.663	127.587	72.4694	163.4	166.494	339.649	314.427	185.04	303.112	163.088	81.4083	37.0398	114.193	202.889	222.382	201.09	568.798	127.54
623	lcl|c244474_g2_i1|m.32252	33.6074	65.6423	29.2576	16.7788	19.1683	82.8296	89.3935	97.0819	26.6604	47.5983	17.6796	37.0371	47.5182	0	69.1489	33.1751	18.1387	69.055	31.2184	20.5303	73.2164	9.227	90.2993	83.6972	30.4674	48.2144	81.8279	65.1538	35.3175	58.2671	27.9411	57.7504	72.7656	54.9419
624	lcl|c224694_g1_i1|m.10068	67.9149	47.3758	39.4165	76.2911	96.8396	46.4958	27.0974	39.2373	62.8557	28.8565	35.7275	84.2016	86.4237	0	139.738	75.4215	119.13	39.871	31.5436	62.2323	105.684	83.9083	136.86	75.1725	92.3544	126.663	64.3069	84.6418	53.5281	88.311	28.2321	87.5279	136.544	92.5237
625	lcl|c222419_g1_i6|m.8316	188.732	47.8745	189.199	239.849	107.645	187.941	273.826	158.601	190.552	213.841	225.647	264.718	242.593	0	185.337	220.178	222.247	110.799	191.254	167.7	149.516	169.583	73.7603	85.4593	259.241	108.305	213.518	161.562	81.1373	178.481	152.156	78.6216	371.488	177.645
626	lcl|c222437_g1_i2|m.8353	403.609	294.542	450.474	356.51	371.864	467.615	487.237	538.111	451.535	554.044	432.813	376.368	474.096	87.2118	255.522	367.769	360.27	647.05	615.25	550.015	318.865	375.057	283.626	524.06	431.574	650.297	403.165	687.882	367.05	421.65	636.701	835.822	364.917	710.582
627	lcl|c222451_g1_i1|m.8369	8.8106	39.3347	10.227	26.3926	50.2519	28.953	37.497	122.166	65.234	49.9139	27.8095	19.4195	59.7959	0	18.1282	8.6972	38.0423	41.3797	0	21.529	65.81	19.3518	66.2846	78.0169	42.5995	50.56	19.0686	39.042	37.0356	10.1836	19.5336	30.2799	32.7024	9.6025
628	lcl|c222456_g3_i2|m.8372	0	0	0	0	0	7.7628	0	0	0	0	7.4562	0	0	0	7.2907	0	7.6498	0	0	0	0	0	0	0	8.5662	8.1336	0	7.8508	0	0	0	0	8.768	0
629	lcl|c214108_g4_i4|m.3369	41.0052	102.975	190.389	112.597	187.101	123.521	43.6285	35.5356	108.43	150.997	258.856	101.677	69.5738	0	31.6389	182.15	132.789	144.439	165.058	112.723	140.381	180.13	22.0353	147.508	161.088	235.31	77.6536	79.4958	75.4106	165.884	306.825	176.157	114.15	368.698
630	lcl|c222459_g5_i1|m.8379	29.9992	50.2241	52.2329	69.8945	62.7378	49.2912	37.2382	17.3318	37.0193	45.3206	21.0419	27.5506	28.2777	0	20.575	44.42	21.5884	64.5764	74.3113	30.5435	56.0192	21.9637	42.9891	55.3417	48.3492	51.6456	21.6423	60.9282	63.0515	40.4533	72.0525	40.0946	18.5581	59.9417
631	lcl|c222639_g5_i2|m.8480	372.562	407.161	306.323	333.259	416.134	280.569	445.946	573.985	418.696	334.185	351.15	350.706	386.3	145.353	383.282	375.431	368.648	282.515	298.012	388.804	289.877	383.581	500.516	463.922	394.046	383.052	394.766	309.547	326.266	394.736	344.163	293.427	326.505	372.209
632	lcl|c222667_g10_i4|m.8510	0	9.9958	10.3956	8.9426	0	9.8101	0	0	0	10.1473	0	9.8698	10.1303	0	18.427	26.5218	0	10.5154	11.0923	0	11.1491	9.8354	0	0	10.8254	10.2787	19.3829	9.9214	0	10.3515	9.9278	10.2597	11.0805	0
633	lcl|c222694_g7_i2|m.8539	0	0	12.5853	0	4.1227	3.9588	0	0	0	0	0	3.9829	0	0	0	0	0	0	0	4.4156	0	0	0	0	0	0	3.911	0	0	0	0	4.1403	0	0
634	lcl|c222899_g2_i4|m.8691	38.0535	56.6297	44.171	31.6643	28.9389	41.6834	67.4799	80.612	33.5417	64.6744	53.3827	41.937	35.8698	71.2626	13.0495	62.6067	20.5384	14.8935	39.2761	23.2463	7.8955	20.8954	27.2655	49.14	45.9975	94.6278	48.0425	35.1302	66.6497	65.9755	49.214	58.1249	31.3875	76.035
635	lcl|c222915_g1_i4|m.8711	0	0	7.3191	0	0	3.4535	0	0	3.3347	0	16.5853	3.4745	0	0	6.4869	0	0	7.4035	31.2385	0	0	3.4624	0	10.4689	3.8109	0	0	3.4926	0	3.644	20.9693	0	3.9007	3.4361
636	lcl|c222946_g2_i3|m.8728	89.5582	239.899	83.1645	268.276	377.994	245.252	276.334	93.1346	132.619	131.915	197.875	325.703	91.1723	0	340.9	150.29	116.008	147.216	133.107	98.4775	323.325	108.189	250.258	148.693	129.905	195.295	251.978	109.135	263.523	165.624	148.917	164.155	155.127	234.258
637	lcl|c220806_g2_i3|m.7164	159.452	59.3227	164.521	97.2988	111.155	29.1104	160.228	81.8865	84.3281	130.481	46.601	78.1	140.282	0	54.6802	52.4671	162.559	83.2091	21.9434	21.646	165.419	145.927	104.728	137.272	160.616	111.836	57.5167	68.6948	18.6185	225.257	58.9192	71.0372	274.001	67.5825
638	lcl|c214189_g1_i1|m.3388	7.3092	8.158	0	7.2984	8.3378	0	0	0	15.4623	0	0	8.0552	0	0	0	7.2152	7.8899	0	0	0	9.0993	8.0271	7.8556	0	8.8351	16.7777	15.8192	0	7.6812	8.4483	0	0	27.1298	0
639	lcl|c222950_g5_i5|m.8734	80.9397	115.259	61.5545	91.9674	178.291	64.2024	136.601	64.4996	73.8032	104.358	58.7301	123.034	151.537	0	71.7834	79.8985	78.332	85.2039	51.8525	109.12	135.508	113.41	80.9911	160.643	111.331	179.384	111.751	68.0226	61.5939	122.587	117.569	131.092	120.861	155.136
640	lcl|c222960_g2_i1|m.8750	210.206	226.923	203.999	258.067	196.546	313.301	36.6646	39.818	164.021	242.077	181.281	205.075	218.282	567.891	141.806	234.715	234.346	125.429	166.454	189.46	223.077	219.498	233.327	152.57	295.743	205.66	197.64	259.592	257.116	274.828	267.399	217.124	162.014	232.855
641	lcl|c214118_g1_i2|m.3372	388.599	518.059	576.369	355.688	591.043	567.556	597.22	573.748	559.457	415.839	397.498	452.049	402.929	0	155.47	213.111	233.041	595.689	561.518	633.039	349.388	497.893	371.244	812.461	495.819	359.277	572.374	526.162	646.591	474.111	406.842	296.784	280.461	329.409
642	lcl|c223053_g2_i3|m.8836	13.5454	5.0394	5.241	9.0169	0	0	0	0	19.103	10.2317	19.0019	4.9759	5.1072	0	9.2901	8.9141	4.8738	0	0	0	0	9.9171	4.8526	4.9976	5.4577	25.9102	4.886	25.0096	28.4692	10.4375	5.0051	15.5174	16.7588	9.8419
643	lcl|c223078_g3_i2|m.8859	6.7915	0	0	13.5629	0	0	7.226	0	0	0	0	7.4846	0	0	0	0	7.3311	0	0	0	0	0	7.2992	0	8.2093	0	0	0	21.4112	7.8499	0	31.121	8.4027	0
644	lcl|c223098_g6_i3|m.8878	8.8345	39.4413	20.5094	17.6428	30.2329	24.1929	28.1989	10.2081	23.361	20.0197	27.8849	24.3401	29.979	0	4.5443	26.1625	9.5364	36.3053	27.3549	37.7779	27.4951	29.1064	18.9898	39.1142	42.715	5.0697	23.9004	9.7869	9.284	35.7392	34.2764	5.0603	43.7213	33.6997
645	lcl|c223162_g2_i6|m.8914	1.8294	2.0418	4.2469	3.6533	6.2603	4.0077	5.8392	2.1138	3.8699	2.0727	0	6.0482	2.0693	0	0	0	0	6.4438	4.5315	0	4.5547	8.0361	0	8.0994	4.4225	8.3983	1.9796	10.1329	13.4571	6.3433	2.0279	0	4.5267	5.9813
646	lcl|c223259_g2_i5|m.8979	5.2075	0	0	0	0	0	0	0	0	0	0	0	0	0	0	0	0	0	0	0	6.4829	5.719	0	0	6.2947	0	0	0	0	0	0	0	0	0
647	lcl|c223274_g3_i3|m.8991	62.6907	17.4926	54.5767	0	17.8781	17.1677	50.026	36.219	33.1547	35.5156	32.9792	34.5442	17.7279	0	48.371	30.9421	16.9179	36.804	38.8229	19.1484	58.5329	17.2119	33.6886	34.695	0	17.9877	33.9201	52.0873	32.9403	18.1151	34.7472	17.9544	38.7817	34.1626
648	lcl|c223277_g3_i4|m.8995	2.3691	0	5.5	2.3656	5.405	5.1902	2.5207	0	0	5.3686	0	2.6109	0	0	0	2.3386	0	0	0	2.8945	2.9493	2.6018	0	2.6223	2.8637	2.7191	0	0	0	5.4767	2.6262	2.714	0	0
649	lcl|c223331_g1_i2|m.9037	0	0	13.1388	11.3024	0	0	0	0	0	0	11.9092	0	0	0	11.6449	0	0	0	0	0	14.0913	0	0	0	0	51.9644	12.2489	0	11.8951	13.0831	0	12.9671	0	12.3365
650	lcl|c223345_g3_i1|m.9044	5.6793	12.6776	19.7769	11.3418	6.4785	12.4421	6.0426	13.1247	12.0142	12.8698	11.9507	12.5178	12.8481	0	29.2136	5.6062	6.1305	6.6683	21.1023	6.9388	14.1403	0	18.3116	6.2862	0	6.5182	12.2916	12.5832	11.9366	6.5643	6.2957	6.5061	21.0799	12.3795
651	lcl|c223355_g1_i3|m.9051	20.9641	14.624	9.1254	15.6998	17.9356	8.6114	19.5171	6.0559	11.0871	8.9075	13.7855	14.4397	17.7849	0	29.6551	10.3472	16.9723	12.3075	9.7369	12.8067	16.3114	14.3894	14.082	17.4033	15.8378	18.0455	2.8358	20.3213	11.0154	12.1155	11.6196	15.0101	19.4532	17.1362
652	lcl|c214211_g3_i3|m.3396	10.3162	103.627	47.8985	61.8055	47.0714	33.9007	98.7855	178.803	163.675	58.4434	65.1235	34.107	58.3451	0	74.2913	30.5505	44.5432	84.789	153.326	12.604	38.528	45.3175	88.6991	91.3489	12.4698	35.52	122.799	68.5706	86.729	47.6954	68.6148	11.8181	51.0543	11.2434
653	lcl|c223365_g2_i2|m.9063	8.1295	4.5367	14.1546	8.1174	13.9101	8.9049	17.2991	28.1804	12.8981	9.211	8.5532	4.4796	13.7933	0	4.1817	12.0373	4.3877	14.3178	20.1376	4.9662	10.1204	8.9279	8.7372	17.9964	9.8266	9.3303	4.3986	22.5149	12.8147	9.3963	9.0117	18.6261	5.029	13.2902
654	lcl|c223378_g2_i2|m.9075	0	0	0	11.4616	13.0938	0	0	0	24.2823	0	6.0384	6.325	0	0	29.5222	5.6655	18.5858	0	0	0	0	6.303	0	0	0	13.1741	18.6322	6.3581	0	19.9011	6.3622	0	56.8069	0
655	lcl|c223414_g3_i3|m.9104	0	5.5805	17.411	0	0	5.4768	10.6395	0	5.2885	16.9952	26.3024	16.5304	0	0	0	0	5.3971	35.2235	61.9261	0	0	5.4909	0	22.1367	6.0436	11.4768	0	22.1557	5.2543	5.779	33.255	0	6.186	21.797
656	lcl|c223448_g1_i3|m.9130	0	0	0	0	0	0	6.3293	0	0	6.7402	0	0	0	0	0	0	6.4214	20.9541	0	7.268	0	6.533	0	6.5845	7.1906	13.6549	0	6.5901	6.2515	6.8758	6.5944	13.6297	0	6.4834
657	lcl|c223448_g1_i5|m.9132	0	0	0	0	0	0	0	0	0	0	0	0	0	0	0	0	0	0	0	0	5.499	0	0	0	0	0	0	0	0	0	0	10.1207	0	0
658	lcl|c223454_g1_i3|m.9139	12.3016	41.1901	35.698	30.7084	56.1305	80.85	65.4428	56.857	19.5175	34.8455	45.2997	27.114	27.8295	0	12.6556	54.645	26.5578	86.6631	45.7085	45.0891	45.9428	40.5293	13.2212	81.6969	37.1741	35.2966	39.9361	54.5114	25.8551	42.6559	34.0916	21.1388	45.6599	73.7396
659	lcl|c215384_g1_i4|m.3995	0	0	0	0	11.4773	0	0	0	0	11.4001	10.5859	0	11.3809	0	0	0	0	0	0	12.2928	0	11.0496	10.8136	0	12.1619	0	0	0	0	11.6294	0	11.5263	12.4484	21.9315
660	lcl|c223499_g2_i8|m.9175	0	0	64.4997	0	10.5643	0	19.7072	10.7011	19.5914	31.4798	0	0	0	0	19.0552	45.71	19.9938	0	0	0	0	61.0242	39.8138	0	89.5558	31.8872	0	10.2596	0	117.748	0	0	11.4582	10.0935
661	lcl|c223499_g2_i6|m.9173	188.837	122.022	0	109.165	11.3373	0	0	11.4841	0	33.7832	0	0	0	0	20.4495	49.0546	21.4568	0	0	97.1432	111.355	65.4894	42.727	99.0077	96.1087	34.2205	161.327	11.0103	52.2225	0	0	0	12.2966	10.832
662	lcl|c223556_g1_i6|m.9203	28.2979	25.2671	6.5694	33.9072	32.2799	24.7977	24.0866	26.1582	29.9313	25.6502	23.8183	31.1858	25.607	0	17.4673	27.9339	30.5461	19.9355	28.0387	48.4029	35.2281	24.8617	30.4133	25.0575	41.0464	45.4689	24.4979	25.079	29.7378	32.7078	31.369	38.9013	35.0112	18.5047
663	lcl|c223608_g1_i1|m.9238	0	0	0	1.9058	0	0	0	0	2.0188	0	0	0	0	0	0	0	2.0603	0	0	0	2.376	0	0	0	2.3071	0	0	2.1144	2.0057	0	0	0	4.7228	0
664	lcl|c223611_g2_i2|m.9249	0	0	0	0	0	0	0	0	0	3.9716	7.376	0	0	0	0	3.4602	0	0	4.3415	0	0	3.8496	0	0	0	0	0	3.8832	0	4.0515	7.7714	4.0156	0	0
665	lcl|c223629_g2_i1|m.9258	6.9066	38.543	16.0338	0	15.757	15.1308	36.7422	15.9609	14.6105	7.8255	7.2666	15.2229	15.6246	0	0	27.271	22.366	24.3281	17.1084	8.4383	34.3922	53.0945	14.8458	30.5787	8.3484	71.341	37.3696	45.9074	43.5482	7.9829	15.3123	47.4728	34.1805	22.582
666	lcl|c223629_g2_i2|m.9260	13.8132	53.9602	64.1353	0	0	30.2617	0	0	7.3053	7.8255	0	38.0572	39.0616	0	49.7374	40.9066	0	0	0	16.8766	8.5981	30.3397	7.4229	15.2893	25.0453	0	0	0	0	31.9317	15.3123	7.9121	8.5451	7.5273
667	lcl|c214261_g2_i4|m.3427	0	0	0	0	0	7.0571	0	0	0	0	0	0	0	0	0	0	0	0	0	0	0	0	0	0	7.7875	0	0	0	0	0	0	14.761	0	0
668	lcl|c223635_g1_i2|m.9265	0	0	0	0	0	0	8.2978	0	0	0	8.2054	0	0	0	0	0	8.4185	0	0	0	19.4176	0	0	0	0	0	0	0	0	0	0	0	9.649	0
669	lcl|c223654_g2_i3|m.9281	3.6794	0	4.2709	0	0	4.0303	0	4.2514	3.8917	12.5066	3.8711	0	4.1619	0	3.7852	3.632	0	0	0	0	4.5805	4.0407	0	4.0726	13.3424	12.6685	0	4.0761	7.7332	0	8.1574	8.4301	0	0
670	lcl|c223673_g2_i1|m.9297	0	0	13.4184	11.5429	13.1867	6.3313	79.947	0	12.2272	6.549	6.0813	0	0	0	11.8926	11.4113	6.2392	6.7866	7.1588	14.1237	21.5866	12.6953	37.2725	0	0	0	25.0191	0	24.2964	86.8496	64.0729	13.243	14.3025	12.599
671	lcl|c223761_g4_i7|m.9360	4.0851	6.8392	2.3709	2.0395	11.6499	4.4748	6.5197	2.3601	6.4814	13.8858	4.298	4.502	4.6208	0	6.304	2.0163	0	7.1948	10.1192	2.4955	2.5428	2.2432	4.3905	2.2608	4.9379	7.0328	2.2103	6.7883	12.8789	7.0826	9.0569	11.6996	2.5271	6.6784
672	lcl|c223761_g4_i10|m.9352	0	0	3.3019	0	0	0	0	0	0	0	0	0	0	0	0	0	0	0	0	0	0	0	0	0	0	0	3.0783	0	0	0	0	0	3.5195	0
673	lcl|c223794_g7_i1|m.9389	2.0659	11.5287	4.7959	2.0628	9.4262	13.5775	0	0	0	0	0	9.1067	2.3368	0	0	0	0	7.2768	5.1173	0	0	0	0	2.2866	0	0	2.2355	6.8657	0	0	0	0	12.7798	2.2515
674	lcl|c223808_g2_i1|m.9405	15.2333	8.5011	17.6822	7.6053	17.3768	8.3432	16.2078	17.6018	16.1125	8.63	4.0068	12.5909	12.9232	0	7.8358	26.3153	20.5544	13.4146	4.7168	9.3058	33.1869	12.547	24.558	12.6458	13.81	21.8542	12.3634	4.2189	4.0021	22.009	12.6649	17.4511	18.8472	12.4518
675	lcl|c223865_g4_i2|m.9445	23.3518	36.4889	27.1059	23.3173	15.9827	25.5793	29.8149	37.7757	29.6397	21.1669	19.6552	20.588	26.4141	0	33.6333	27.6617	45.3728	38.3859	17.3535	11.4122	75.584	30.7744	20.078	10.3389	22.5814	69.6829	35.378	20.6956	14.724	59.3801	25.8862	42.8026	40.4485	15.2704
676	lcl|c223901_g5_i2|m.9467	4.335	9.6768	5.0319	4.3286	4.945	4.7485	4.6123	5.009	4.5852	9.8235	4.561	4.7774	0	0	0	0	0	10.1798	10.7382	5.2964	0	0	0	9.5965	15.7199	9.9506	9.3822	14.4071	9.1112	5.0106	9.6109	0	0	14.1738
677	lcl|c223941_g1_i2|m.9485	7.0663	10.5158	5.4682	16.4636	18.8082	7.7403	12.5306	2.7217	4.9828	10.6752	14.8692	10.3832	13.3216	0	21.8089	20.9262	5.0851	8.2969	2.9173	5.7556	32.2551	12.9338	10.126	18.25	14.2358	16.2201	5.0978	10.4375	12.3764	10.89	20.8885	29.6819	29.1423	15.4028
678	lcl|c221840_g3_i2|m.7908	3.5357	3.9463	20.5205	21.1828	20.1662	27.1108	26.3333	4.0854	11.2194	8.0122	11.16	19.4827	11.9981	0	18.1872	17.4511	34.3495	20.7572	8.7583	4.3198	13.2048	3.883	34.2001	7.8271	0	16.2318	19.1307	35.2521	18.5781	8.1734	15.6777	32.4037	26.247	19.2674
679	lcl|c221840_g3_i5|m.7911	0	6.3609	0	11.3814	13.0022	6.2428	0	6.5853	0	0	0	12.5615	19.3396	0	0	5.6258	12.3039	0	0	6.9631	0	0	6.1252	0	20.6667	6.541	0	6.3136	5.9892	0	0	6.5289	0	6.2114
680	lcl|c224714_g2_i1|m.10079	0	0	0	0	0	0	2.7748	0	2.7585	0	0	5.7482	5.8999	0	2.683	2.5744	0	0	0	0	0	2.8641	2.8029	0	0	0	0	0	0	3.0143	2.891	0	0	2.8423
681	lcl|c223960_g3_i7|m.9508	0	0	0	1.8579	0	0	0	2.15	0	0	0	0	0	0	0	0	0	2.1847	0	0	0	0	0	0	0	0	4.027	0	0	0	0	0	0	0
682	lcl|c214319_g7_i2|m.3452	0	0	0	20.0931	11.4773	11.0212	0	0	0	0	0	0	0	0	0	0	0	0	0	0	62.6278	0	0	0	0	23.0953	0	0	0	0	0	0	0	10.9658
683	lcl|c224029_g4_i1|m.9563	127.082	104.837	157.132	135.169	148.115	175.518	108.757	130.88	111.04	134.598	145.332	133.961	153.121	693.26	96.6326	147.264	184.892	178.406	140.289	155.264	161.643	154.732	103.921	128.43	140.254	177.56	149.478	174.448	121.935	175.624	153.123	142.418	105.959	132.481
684	lcl|c224057_g7_i5|m.9575	4.137	4.6173	4.802	4.1308	4.7191	9.0631	4.4016	4.7802	4.3757	9.3747	13.0578	0	0	0	0	0	0	9.7148	10.2477	0	0	9.0865	0	4.579	0	4.748	8.9535	9.1659	8.6949	0	0	14.2177	10.2368	4.5088
685	lcl|c224226_g3_i4|m.9666	30.6095	0	0	7.6411	8.7292	25.147	0	17.6844	0	0	8.0513	0	0	0	0	15.1079	0	17.97	0	9.3495	0	0	0	0	0	17.5654	8.281	16.9548	16.0835	0	8.4829	35.066	0	8.3402
686	lcl|c224257_g2_i4|m.9682	20.7198	0	32.0677	6.8964	0	0	22.0453	7.9805	0	7.8255	7.2666	7.6114	15.6246	0	0	20.4533	0	24.3281	8.5542	0	17.1961	0	0	0	16.6968	23.7803	7.4739	7.6512	7.258	7.9829	0	15.8243	8.5451	0
687	lcl|c224260_g2_i3|m.9686	16.4642	0	19.111	24.6598	9.3905	0	0	9.5121	0	27.982	17.3224	18.1445	18.6233	0	0	24.3787	17.7723	9.6657	10.1959	30.1733	30.7445	18.0812	8.8475	9.1118	9.9506	37.7923	26.7249	27.359	8.651	9.515	18.2511	28.2919	10.1851	17.944
688	lcl|c224263_g3_i3|m.9691	8.946	3.9939	0	12.5058	8.1639	3.9197	3.8073	2.0674	3.7849	4.0545	7.5298	0	6.0715	46.9086	3.6814	8.8309	7.7254	2.1008	4.432	6.558	8.9095	1.9649	3.8459	0	8.6508	41.0696	3.8723	3.9642	7.521	10.3401	5.9501	24.5962	13.282	1.95
689	lcl|c224312_g2_i3|m.9718	5.746	2.1378	4.4465	70.7628	39.3276	62.9414	0	6.6394	40.518	8.6807	40.3036	103.43	71.495	0	53.2024	30.2513	31.0128	35.9823	54.5619	9.3604	42.9195	31.5519	2.0585	74.2009	46.3038	112.111	37.3081	63.6554	44.2817	22.1383	48.8339	122.875	33.1763	58.4497
690	lcl|c203039_g1_i1|m.1291	0	0	0	0	0	0	0	0	0	0	0	0	0	0	0	1.6452	0	0	0	0	0	0	0	0	0	0	0	0	0	0	0	0	0	0
691	lcl|c224361_g2_i9|m.9757	0	0	0	2.896	0	0	0	0	0	0	0	0	0	0	0	0	0	0	0	0	0	0	0	0	3.5057	9.986	0	0	0	0	0	0	0	0
692	lcl|c224498_g4_i2|m.9859	15.0922	16.8447	29.1974	45.2096	17.2159	38.5743	21.4103	40.6905	37.2478	28.5002	47.6366	38.809	17.0713	0	5.1755	24.8301	27.1521	5.9068	18.6925	12.2928	43.8394	49.7234	32.4409	11.1367	48.6476	46.1906	16.3319	39.0119	42.2938	34.8883	39.037	17.2895	43.5695	21.9315
693	lcl|c224541_g6_i2|m.9899	8.4018	9.3775	19.5051	0	9.5841	0	17.8787	9.7082	35.5473	9.5197	8.8398	46.2964	57.0218	0	8.6436	8.2938	27.2081	9.865	10.4061	20.5303	10.4595	9.227	27.0898	46.4985	20.3116	77.143	27.276	27.9231	26.4881	19.4224	18.6274	28.8752	51.9754	18.314
694	lcl|c214452_g3_i2|m.3499	0	0	0	0	0	0	0	0	0	46.3635	0	0	0	0	0	0	0	0	0	0	0	0	0	0	0	0	0	0	0	0	0	0	0	0
695	lcl|c224583_g1_i1|m.9971	0	3.838	3.9915	6.8673	0	0	0	0	0	0	0	3.7897	0	0	10.613	6.789	11.1358	0	0	0	8.5618	0	0	0	0	11.84	3.7212	0	0	0	3.8119	7.8787	12.7636	7.4956
696	lcl|c224591_g2_i4|m.9998	0	0	0	0	0	0	0	27.9021	0	0	0	26.6119	13.6571	0	0	0	13.033	0	14.954	0	0	0	0	0	0	13.8572	0	0	0	0	0	0	0	0
697	lcl|c224713_g2_i1|m.10075	21.0998	52.9873	24.4918	15.8014	36.1033	28.8906	72.9613	60.9511	0	0	11.0998	46.5062	0	0	48.8406	31.2425	17.0821	61.9356	45.7331	45.1134	13.1336	40.5511	5.6693	35.0319	38.2569	24.2164	34.2494	23.3746	72.0637	24.3879	58.4743	36.2575	0	40.2433
698	lcl|c224811_g1_i3|m.10150	14.2979	7.9791	16.5964	0	0	0	7.6063	0	0	8.1001	7.5216	7.8785	8.0864	0	0	14.114	7.7169	0	8.8543	8.7344	35.5989	15.7021	7.6834	0	17.2827	16.4098	0	15.8394	7.5127	8.263	7.9248	8.1897	8.8449	0
699	lcl|c224835_g5_i2|m.10167	114.933	23.3235	72.7689	104.33	214.537	34.3353	66.7013	24.146	44.2062	213.094	21.9861	69.0885	212.735	0	53.7455	154.711	180.457	110.412	0	165.953	143.08	103.272	22.4591	69.39	353.631	131.91	0	0	43.9205	144.921	220.066	119.696	103.418	34.1626
700	lcl|c224848_g3_i5|m.10172	32.2126	71.9063	67.3041	51.4638	36.7455	42.3424	27.4187	59.5538	20.4432	14.5993	13.5567	56.8	29.1495	0	46.3954	12.7193	34.7719	30.2579	39.897	23.6139	104.264	35.3763	27.6965	42.7859	38.9373	66.5473	41.8303	35.6856	6.7703	29.7861	7.1417	73.8048	71.7384	42.1294
701	lcl|c224890_g1_i1|m.10217	0	0	13.8438	0	0	4.3547	4.2298	0	4.205	4.5044	12.5482	8.7624	13.4905	0	4.0899	0	4.2914	9.3357	4.9239	9.7143	0	8.7319	0	4.4003	14.4163	13.6882	8.6041	13.2124	4.1778	0	8.8139	4.5543	9.8373	17.3313
702	lcl|c224995_g6_i2|m.10289	4.3121	4.8128	5.0053	12.917	9.8377	9.4468	4.5879	9.965	18.2438	4.8857	9.0736	4.7521	4.8775	0	13.3084	8.5132	4.6546	10.126	0	0	10.7362	14.2067	9.2688	23.8643	15.6367	14.847	9.3325	14.3309	4.5315	14.9521	14.3401	14.8195	21.3402	9.3992
703	lcl|c225079_g1_i6|m.10351	0	0	0	0	0	0	0	0	0	0	0	0	0	0	0	0	0	0	0	0	0	0	0	3.1322	0	9.7433	0	0	0	0	0	0	7.0022	0
704	lcl|c225112_g3_i3|m.10371	0	0	0	0	4.1045	0	0	0	0	0	0	0	0	0	0	0	0	0	0	0	0	0	0	0	0	8.2592	0	0	0	4.1589	0	0	4.4518	0
705	lcl|c187253_g2_i1|m.744	0	0	0	0	5.1936	0	0	0	0	5.1587	4.7903	0	0	0	0	4.4944	4.9147	5.3458	5.6391	0	0	5.0001	14.6799	0	5.5034	0	0	0	0	5.2625	15.1412	10.4316	5.6331	0
706	lcl|c214539_g3_i1|m.3522	6.4046	21.4448	3.7171	12.7901	14.6116	7.0155	20.4428	11.1005	10.1613	18.1416	0	7.0582	10.8666	0	3.2944	3.1611	3.4567	7.5199	0	7.8249	19.9326	14.0671	6.8833	10.6334	3.8708	11.0258	10.396	3.5475	13.4609	7.4026	0	0	19.8099	6.9802
707	lcl|c225115_g3_i4|m.10375	0	0	0	3.3978	0	3.7274	0	0	0	3.8556	3.5802	0	0	0	0	3.3591	0	0	0	0	0	3.737	0	0	0	3.9055	0	0	7.152	0	0	3.8983	8.4202	0
708	lcl|c225132_g1_i3|m.10387	0	0	6.1428	0	6.0368	0	5.6306	12.2298	5.5975	0	0	5.8321	5.9861	0	5.4444	5.224	0	0	6.5545	6.4657	0	0	5.6877	0	0	24.295	0	5.8626	5.5614	0	0	6.0625	6.5476	5.7677
709	lcl|c225136_g5_i9|m.10397	0	4.4809	0	4.0087	4.5796	0	4.2715	13.9167	0	4.5488	4.2239	4.4244	4.5411	0	4.1302	7.9261	0	4.7138	0	0	4.9979	4.409	0	0	9.7056	9.2154	0	4.4475	4.219	4.6403	4.4504	0	4.9671	4.3755
710	lcl|c225156_g8_i5|m.10409	3.3677	3.7587	3.9091	3.3627	3.8416	0	0	0	0	3.8157	0	0	3.8093	0	0	0	0	3.9542	4.1711	0	0	0	3.6194	3.7276	0	7.7302	0	0	7.0781	0	0	3.858	0	3.6704
711	lcl|c225214_g2_i5|m.10448	0	0	17.1609	11.0717	8.4323	8.0972	7.865	4.2707	15.6376	8.3756	11.6661	4.0732	4.1807	0	3.8024	10.9455	23.9382	13.0191	18.311	4.5157	9.2024	4.0591	11.9171	12.2731	8.9353	12.726	11.999	12.2836	7.7682	17.0881	8.1944	4.2342	4.5729	8.0565
712	lcl|c225222_g1_i4|m.10453	0	6.9172	0	0	0	0	6.594	0	0	0	0	0	0	0	0	0	6.69	0	0	0	0	0	0	6.8599	0	0	6.7066	13.7315	6.5129	0	13.7403	0	0	0
713	lcl|c225236_g1_i2|m.10460	30.4097	27.1527	21.179	48.5834	55.5021	53.2967	32.3551	7.0276	38.598	41.3466	51.1916	20.1078	13.759	0	37.5417	42.0259	32.8257	21.4232	22.5984	52.0151	37.8571	40.0756	39.2196	47.1231	58.8128	62.8226	32.9076	67.3765	12.7828	28.1189	26.968	48.7718	45.1488	33.1428
714	lcl|c225245_g1_i2|m.10472	25.3099	5.6498	23.503	20.2179	17.3229	16.6345	0	17.5471	10.7083	5.7354	10.6517	5.5786	22.9032	0	5.2076	0	16.3925	29.7175	43.8867	0	0	0	16.3212	0	0	11.6194	0	11.2155	5.3196	5.8508	16.8341	11.5979	18.7886	44.1355
715	lcl|c225328_g5_i5|m.10528	5.3972	0	0	0	6.1567	11.8241	0	0	0	6.1153	5.6785	0	0	0	0	0	0	0	6.6847	0	6.719	0	11.6014	0	0	6.1944	0	0	5.6718	0	0	0	0	5.8823
716	lcl|c225457_g2_i2|m.10643	1.5037	3.3565	5.2361	1.5014	3.4305	4.9412	0	3.4749	1.5904	1.7037	1.582	1.6571	1.7008	0	0	0	0	5.2965	3.7247	5.5114	1.8719	0	1.6161	3.3287	1.8176	3.4515	0	3.3315	4.7405	3.476	3.3337	1.7226	0	0
717	lcl|c214559_g9_i1|m.3528	57.9541	16.1709	50.4531	7.2335	41.3182	39.6764	7.7077	0	30.6496	24.6242	22.8656	7.9836	8.1942	0	14.9054	28.6043	39.099	85.0582	35.8896	17.7016	45.092	71.6017	7.7858	24.0552	35.0263	58.2001	39.1966	32.1012	38.0644	58.6123	120.457	33.1958	35.8515	78.9535
718	lcl|c225471_g2_i2|m.10654	149.822	54.7787	152.919	61.9034	100.185	62.2498	90.6969	50.7411	51.9125	102.438	130.453	193.579	192.844	38.6994	143.503	96.8965	100.381	115.253	47.9903	123.084	106.12	90.7787	127.707	77.1978	209.2	136.376	89.4502	74.4025	48.8624	161.227	114.539	109.491	214.129	109.797
719	lcl|c225478_g2_i2|m.10668	0	0	0	1.8124	0	0	0	0	0	0	0	0	0	0	0	0	0	0	0	0	0	0	0	0	0	18.7488	0	2.0108	0	0	0	2.0794	0	0
720	lcl|c225478_g2_i1|m.10667	0	0	13.4821	3.8659	4.4164	0	0	0	0	4.3867	0	4.2667	4.3793	0	0	7.6437	0	9.0917	0	0	4.8198	0	0	4.2854	4.6799	8.887	4.1897	0	0	0	0	4.4353	0	0
721	lcl|c225710_g7_i3|m.10847	0	7.1906	0	0	0	7.0571	0	0	0	7.2997	0	0	0	0	0	0	0	0	7.9794	0	0	0	0	0	7.7875	0	0	0	0	0	0	0	15.9419	0
722	lcl|c225747_g4_i1|m.10900	0	0	2.2206	1.9103	0	0	2.0355	2.2106	0	0	2.0128	0	0	0	0	0	0	0	0	0	2.3816	0	2.0561	0	0	2.1957	0	0	0	0	2.1207	0	4.7339	2.085
723	lcl|c225753_g2_i5|m.10911	8.9558	9.9958	10.3956	17.8851	40.8642	9.8101	9.5288	0	9.4728	10.1473	18.8453	19.7396	10.1303	0	9.2135	26.5218	9.6673	0	0	10.9419	11.1491	39.3416	9.6253	0	21.6509	10.2787	0	19.8428	9.4115	31.0544	19.8556	10.2597	22.161	9.7607
724	lcl|c223432_g3_i1|m.9111	8.5787	9.5749	9.9579	17.132	0	9.397	0	0	9.0739	9.7201	18.0518	18.9084	9.7037	0	8.8256	0	9.2603	0	0	10.4812	10.6797	0	9.22	18.991	0	9.8459	0	19.0073	9.0153	0	0	0	21.2279	9.3498
725	lcl|c225756_g1_i2|m.10914	69.2466	11.8904	24.7319	69.144	18.2286	40.8434	0	6.1549	180.292	42.2474	72.856	23.4811	48.2015	0	38.3596	31.5488	11.4997	37.5257	46.1815	6.508	26.5247	5.8498	68.6983	5.8959	25.7546	165.063	5.7642	29.5048	72.7702	18.4703	70.8571	207.474	26.3614	63.8595
726	lcl|c225775_g7_i7|m.10937	340.961	74.2543	260.632	190.987	246.645	136.641	70.7851	76.873	272.68	188.45	192.491	183.296	272.793	0	153.997	123.137	107.722	361.28	288.399	304.812	248.466	301.385	929.53	110.458	190.992	286.334	125.989	92.1271	576.792	105.733	212.029	466.816	185.202	362.542
727	lcl|c225789_g4_i1|m.10946	0	4.8904	15.258	4.3751	4.9982	4.7996	9.3238	10.1257	4.6345	4.9646	0	4.8288	4.9562	0	4.5077	8.6505	0	20.5786	5.4269	5.3533	0	0	0	9.6997	15.8889	5.0288	9.483	9.708	4.6046	0	9.7143	10.039	16.2633	0
728	lcl|c225859_g2_i6|m.10997	0	0	2.6278	0	0	2.4798	4.8173	0	2.3945	0	0	2.4949	5.1214	0	0	2.2347	0	2.6581	0	2.7659	2.8183	2.4862	2.4331	2.5058	2.7364	7.7947	0	0	2.379	2.6166	7.5286	2.5934	2.8009	2.4673
729	lcl|c226009_g3_i5|m.11131	5.2466	0	2.03	6.9852	0	1.9157	0	0	5.5495	1.9816	1.84	0	1.9782	6.5502	1.7992	3.4528	0	0	0	0	0	0	18.7962	0	2.114	4.0144	0	0	12.8651	2.0214	3.8774	2.0035	0	7.6243
730	lcl|c214573_g3_i1|m.3534	29.3158	26.176	40.8344	17.5634	26.7528	25.6898	0	6.7748	12.4032	13.2864	18.5063	45.2306	33.1602	0	42.2231	63.6651	31.6449	75.7263	43.571	93.1246	72.9907	70.829	12.6029	6.4897	21.2615	94.2088	12.6895	32.4765	92.4225	54.2149	58.4953	47.0174	7.2541	57.5111
731	lcl|c226079_g3_i1|m.11186	25.4681	21.3191	29.5624	38.1456	21.7889	20.9231	47.4205	29.428	33.6727	28.8565	26.7956	0	21.6059	0	13.1005	31.4256	20.6186	37.3791	39.4295	46.6743	0	13.9847	6.843	14.0948	38.481	14.615	27.5601	21.1604	40.146	7.3592	21.1741	36.47	39.3876	41.6357
732	lcl|c226079_g3_i2|m.11188	9.2088	10.2781	5.3446	18.3903	5.2523	25.218	34.2928	10.6406	4.8702	20.8679	24.222	30.4458	15.6246	0	33.1583	18.1807	14.9107	27.0312	22.8112	0	17.1961	0	14.8458	15.2893	27.8281	15.8535	34.8783	15.3025	29.0322	21.2878	35.7288	10.5495	45.5739	20.0729
733	lcl|c226115_g1_i8|m.11228	0	0	0	0	0	0	0	0	0	0	0	0	0	0	0	0	0	0	0	0	0	0	3.6269	0	0	0	0	0	39.0101	0	0	3.866	0	0
734	lcl|c226146_g2_i7|m.11244	2.6163	5.8402	3.0369	0	0	0	5.5674	6.0462	2.7673	2.9644	8.258	0	2.9594	0	0	2.5827	5.6483	0	6.4809	0	3.257	0	0	0	3.1625	9.0083	0	0	13.7472	6.0481	5.8005	5.9944	0	8.5544
735	lcl|c226156_g7_i2|m.11251	0	0	0	64.0765	73.2016	56.2343	40.9662	44.4895	0	0	0	14.1441	0	0	0	0	13.854	105.486	95.3759	78.4029	47.9324	84.5689	27.5875	56.8233	15.5136	0	0	0	0	29.6688	14.2272	0	0	0
736	lcl|c226546_g3_i1|m.11574	0	10.7014	0	0	0	0	0	0	0	0	5.0439	0	0	0	0	4.7323	0	0	0	0	5.9681	5.2648	0	0	11.5896	0	0	0	0	0	0	0	0	0
737	lcl|c244485_g3_i2|m.32271	0	0	0	0	0	0	0	0	0	0	3.5653	0	0	0	0	3.3451	0	0	0	0	0	3.7215	0	0	0	3.8892	0	0	0	0	0	0	0	0
738	lcl|c226613_g4_i3|m.11623	38.4165	18.3761	19.111	21.9198	6.2603	6.0116	5.8392	25.3655	5.8049	31.0911	5.7741	12.0963	18.6233	0	45.168	37.9223	35.5446	12.8876	13.5945	13.4103	34.1606	18.0812	23.5934	24.2982	26.5351	31.4936	11.8778	0	11.5347	12.6867	6.0837	25.1483	67.9006	17.944
739	lcl|c226629_g1_i3|m.11641	0	5.6149	0	5.0233	5.7386	5.5106	0	0	5.3211	5.7	5.293	11.0883	5.6904	0	0	0	0	17.7205	6.2308	0	0	5.5248	5.4068	22.2733	6.081	5.7738	0	16.7194	0	5.8147	16.7301	5.7632	0	27.4144
740	lcl|c226631_g6_i18|m.11657	0	3.1258	6.5017	0	0	3.0678	0	0	2.9623	0	5.8932	0	0	0	0	0	0	0	0	3.4217	3.4865	0	0	0	0	0	9.092	3.1026	2.9431	0	3.1046	0	3.465	3.0523
741	lcl|c226705_g1_i7|m.11718	0	0	0	0	0	0	0	0	28.8543	0	21.5262	0	7.7142	0	0	0	0	0	0	0	0	0	7.3297	0	0	15.6545	0	0	0	0	0	0	0	0
742	lcl|c214602_g8_i1|m.3549	14.2979	47.8745	16.5964	42.8301	81.5492	15.6617	76.0629	16.521	15.1232	48.6003	15.0431	47.2711	64.6914	0	14.7093	28.2279	30.8677	67.1512	35.4174	34.9375	35.5989	47.1064	30.7334	31.6516	34.5654	32.8196	46.417	31.6788	60.1017	82.6302	31.6992	65.518	35.3798	15.5829
743	lcl|c226715_g5_i2|m.11728	3.4533	0	8.0169	3.4482	11.8177	3.7827	11.0227	0	7.3053	7.8255	3.6333	7.6114	0	0	3.5527	3.4089	0	8.1094	4.2771	4.2191	12.8971	7.5849	3.7115	3.8223	4.1742	15.8535	11.2109	11.4769	3.629	11.9744	3.8281	7.9121	8.5451	7.5273
744	lcl|c226739_g4_i2|m.11743	4.1687	9.3055	4.8389	4.1625	14.2659	13.699	4.4354	4.8169	4.4093	4.7233	0	0	4.7154	0	0	0	0	4.8947	5.1631	10.1864	10.3792	0	4.4803	9.2283	5.0389	9.5689	9.0222	4.6181	13.1424	0	9.2422	0	5.1577	4.5434
745	lcl|c226769_g3_i1|m.11767	197.028	147.937	158.013	135.927	147.111	227.594	171.518	173.851	140.197	263.83	237.45	114.49	125.615	630.608	128.989	180.349	104.407	168.247	181.913	196.955	227.442	157.366	92.403	190.327	194.858	205.573	131.804	265.893	184.466	124.218	190.613	201.09	75.3472	265.492
746	lcl|c210478_g1_i4|m.2192	20.4597	15.2237	47.4977	54.4785	7.7796	52.2932	0	0	14.4271	15.4545	35.877	45.0954	38.5712	0	35.0808	20.1965	22.0852	8.0076	16.8936	16.6647	33.9605	22.4692	36.6487	22.6461	32.9745	23.4818	0	0	50.1686	39.4136	30.2403	15.6256	25.3136	52.03
747	lcl|c226933_g1_i6|m.11949	0	3.9377	0	0	0	0	0	0	0	3.9974	0	11.6643	0	0	3.6296	10.448	0	0	0	21.5523	17.5683	38.7455	0	7.8101	0	0	22.9071	0	0	12.2336	11.7328	0	13.0951	23.0708
748	lcl|c226971_g4_i9|m.11985	8.1907	4.5709	7.1306	12.2679	0	4.486	2.1787	4.7321	2.1659	6.9604	6.4633	9.0266	4.6324	0	10.533	6.064	8.8415	4.8086	2.5362	5.0036	12.7459	4.4976	6.6023	0	7.4255	28.2018	2.2159	13.6107	0	4.7336	9.0797	25.8039	12.6674	11.1586
749	lcl|c226978_g9_i3|m.11996	53.0068	88.7429	230.731	158.785	241.863	203.221	56.3979	91.8726	98.1162	105.103	167.309	131.437	134.905	0	81.7981	156.975	143.045	140.035	65.6517	259.048	148.474	232.851	199.393	44.0034	128.145	136.882	559.268	146.804	69.63	153.168	102.829	91.086	147.56	144.427
750	lcl|c227034_g2_i12|m.12080	5.2579	0	6.1032	0	0	0	0	0	0	0	0	0	0	0	0	0	0	0	13.0245	0	0	0	0	5.8198	0	0	5.6898	0	0	18.2319	23.3143	0	0	0
751	lcl|c227069_g2_i12|m.12102	116.275	136.855	100.612	139.323	72.3471	74.1038	94.4719	90.3831	107.333	67.0697	53.3827	137.46	110.001	31.6722	154.419	156.517	134.641	79.4318	102.118	85.2365	197.387	125.373	84.0685	84.24	99.6614	133.449	125.826	60.8923	126.635	151.499	58.588	121.094	172.631	59.9064
752	lcl|c227080_g2_i3|m.12113	0	0	0	9.1952	21.0093	10.0872	0	0	0	0	0	0	0	0	0	0	0	0	0	11.251	0	0	0	0	0	0	0	0	9.6774	10.6439	10.2082	0	0	0
753	lcl|c227108_g1_i3|m.12161	19.3276	7.1906	22.4347	12.866	14.6982	0	6.8547	0	13.6288	0	20.335	14.2	0	0	19.8837	12.7193	6.9544	0	0	7.8713	16.0406	0	34.6207	0	0	14.7883	0	0	13.5407	14.893	21.4252	81.1853	15.9419	0
754	lcl|c237065_g1_i1|m.22858	60.0906	0	0	7.5002	0	0	79.9186	121.509	0	0	0	0	0	0	38.6373	0	16.2162	8.8194	0	0	9.3509	0	88.8013	0	0	17.2416	0	8.3212	118.403	17.3638	74.9387	68.8392	0	0
755	lcl|c237065_g1_i5|m.22860	7.5113	0	0	0	0	0	0	0	0	0	7.9028	0	0	0	0	0	0	0	0	0	0	0	0	0	0	8.6208	0	24.9635	0	0	0	0	0	0
756	lcl|c214652_g1_i3|m.3567	5.1745	0	0	0	0	0	0	0	0	0	0	0	0	0	0	0	0	0	0	0	0	0	61.1742	0	0	23.7552	5.5995	11.4647	81.5666	0	11.4721	0	0	0
757	lcl|c227129_g2_i15|m.12185	68.2141	60.1067	66.6781	60.9433	65.5267	31.4615	42.0189	53.9296	49.3668	40.6787	52.8829	55.3925	48.7323	389.956	14.7741	53.1605	73.6337	59.0162	40.0201	48.2506	17.8779	31.5426	88.7479	51.6604	34.7177	107.134	81.5876	123.296	71.6851	62.2456	183.073	90.4841	48.8615	82.1708
758	lcl|c227180_g1_i4|m.12217	3.2213	0	0	0	0	0	0	0	0	0	0	3.55	0	0	6.6279	3.1798	6.9544	0	0	0	4.0102	0	0	0	0	7.3941	0	3.5686	3.3852	0	0	0	3.9855	0
759	lcl|c227188_g1_i3|m.12224	70.2568	47.0491	146.792	56.1222	24.0429	53.871	7.4751	0	37.1561	63.6832	51.7432	85.1694	119.205	0	101.19	34.6765	37.9193	49.4951	78.3151	8.5838	52.4778	38.5785	22.6527	69.9882	59.4465	32.2538	7.6028	23.3495	29.5327	73.085	31.1527	24.1456	173.849	107.2
760	lcl|c227206_g2_i7|m.12247	21.2603	11.8645	16.4521	31.8433	20.21	31.0511	15.0803	45.0376	22.4875	24.0889	33.5527	54.67	32.0644	0	21.8721	10.4934	7.6498	20.8023	17.5547	38.9629	22.0559	35.0226	30.4662	7.8441	29.9817	24.4007	15.3378	43.1796	44.6843	28.6691	51.0633	16.2371	26.3041	23.1711
761	lcl|c227332_g2_i2|m.12341	314.259	224.481	291.824	217.564	224.648	257.03	169.411	275.972	226.031	242.127	185.158	207.798	265.418	0	146.564	177.858	167.352	245.991	275.054	230.372	166.922	174.863	207.155	204.067	197.529	307.779	231.25	246.02	149.713	237.312	227.599	240.008	176.262	232.903
762	lcl|c227537_g2_i4|m.12549	0	8.5678	0	0	5.8377	2.8029	0	0	0	0	0	2.8199	0	0	0	0	0	6.0088	0	0	6.3709	0	0	0	0	0	0	0	0	2.9576	2.8365	0	6.3317	0
763	lcl|c227562_g6_i1|m.12582	213.148	447.81	269.245	262.911	343.259	501.296	740.385	680.918	278.499	213.094	277.025	400.713	347.468	727.883	490.159	228.972	331.59	544.7	559.049	344.671	257.545	316.7	276.246	444.096	257.645	201.462	386.689	534.762	487.517	231.873	312.725	201.09	240.446	225.473
764	lcl|c227564_g2_i6|m.12586	6.1277	6.8392	14.2255	9.1779	10.4849	10.0683	16.2992	7.0804	6.4814	6.9429	12.8941	23.6355	6.9312	0	12.608	12.0977	6.6145	0	7.5894	3.7433	3.8142	6.7295	16.4643	23.7387	22.2206	0	3.3155	16.9708	0	10.6239	0	7.0198	7.5814	3.3392
765	lcl|c227565_g2_i7|m.12589	0	0	0	0	0	0	0	0	0	0	0	0	0	0	0	0	2.288	0	0	0	0	2.3278	2.278	0	0	2.4327	0	0	0	2.4499	0	0	0	0
766	lcl|c227731_g2_i1|m.12715	0	0	0	14.575	0	0	0	0	0	0	0	5.3621	0	0	0	0	0	0	0	0	0	0	0	0	0	11.1685	0	0	5.1131	0	0	22.2957	6.0198	0
767	lcl|c214656_g8_i1|m.3574	22.7966	25.4438	13.2307	11.3814	26.0045	0	12.1275	0	0	0	0	0	0	0	11.7263	11.2517	0	0	0	13.9261	42.5694	12.5178	12.2504	0	13.7778	13.0819	0	0	11.9783	0	0	13.0578	14.1024	12.4228
768	lcl|c227758_g2_i4|m.12736	8.5004	7.1156	7.4002	21.2196	16.969	16.2947	20.3496	17.1887	11.2389	14.447	8.9435	21.0778	9.6152	0	15.3038	10.4889	6.8818	27.4471	21.0565	10.3856	13.2278	18.6706	15.9878	21.1698	20.55	36.5851	11.4983	14.1254	15.6327	12.2814	16.4902	7.3035	2.6293	13.8966
769	lcl|c227762_g5_i1|m.12740	0	0	0	0	2.8044	0	0	2.8407	2.6004	0	5.1732	0	0	0	0	0	0	2.8866	3.0449	0	0	0	0	0	0	0	0	2.7235	0	0	0	0	0	0
770	lcl|c227780_g2_i3|m.12767	7.1177	15.8885	8.262	7.1072	16.2386	7.7967	7.5731	16.4488	7.5286	16.1294	7.4887	0	16.1022	0	0	7.0262	0	16.7145	26.447	8.6962	53.1652	15.6336	0	15.7567	17.2072	16.3382	7.7024	0	7.4799	57.5885	7.8902	8.154	35.2253	0
771	lcl|c227804_g2_i3|m.12774	0	0	0	15.8527	6.0368	11.5938	0	0	5.5975	11.9923	22.2717	0	5.9861	0	0	0	0	49.7093	32.7726	0	6.5881	17.4355	0	17.5728	12.7937	0	5.7268	11.7253	22.2454	12.2336	11.7328	18.1876	13.0951	40.374
772	lcl|c227856_g7_i5|m.12838	20.6324	57.5706	35.9239	10.3009	35.3036	11.3002	21.9523	0	0	23.3774	21.7078	22.738	35.0071	0	63.6782	20.367	0	12.1127	12.7772	0	25.6853	33.9882	11.0874	57.0931	12.4698	23.68	44.6543	0	10.8411	23.8477	22.8716	23.6362	12.7636	22.4868
773	lcl|c227887_g3_i2|m.12871	0	34.1106	11.825	61.0329	11.6208	0	21.6779	35.3135	43.1011	11.5426	21.4365	11.2269	11.5232	0	31.4411	20.1124	21.9932	0	0	0	12.6821	11.1878	87.5903	11.2759	0	35.076	22.0481	0	96.3505	23.5496	0	23.3408	50.4162	11.1028
774	lcl|c227910_g4_i10|m.12878	18.1106	15.1602	10.5111	58.7724	82.6365	79.3528	38.5385	47.0847	47.8901	66.6905	28.582	64.8664	35.8498	0	79.1851	44.6942	43.9864	74.4259	39.2542	55.3176	62.0015	44.7511	53.5274	75.1725	27.3643	72.7502	53.8953	35.1107	66.6127	57.5657	55.2095	88.1763	39.2126	69.0843
775	lcl|c227928_g1_i2|m.12896	8.4454	28.2782	9.8031	16.8657	19.2676	27.7529	35.9427	48.7925	17.8657	19.138	35.5423	9.3073	0	0	86.884	41.6837	36.4654	29.7483	20.9201	30.9549	42.0547	9.2748	9.0767	18.6958	40.8337	58.157	27.4173	46.7796	35.5005	19.523	28.0858	58.0496	52.2447	18.4089
776	lcl|c227928_g3_i7|m.12901	139.885	0	42.358	6.0729	20.8133	33.3104	6.471	21.0827	32.165	20.6733	25.5958	26.8105	27.518	0	12.5139	24.0148	6.5651	14.2822	30.1312	7.4307	37.8571	26.7171	26.1464	26.9275	22.0548	76.7832	19.7445	53.9012	38.3485	21.0892	53.936	83.6088	30.0992	99.4284
777	lcl|c227939_g2_i2|m.12910	92.2618	89.2452	199.909	98.2668	119.277	107.8	98.1642	99.4998	97.5873	76.6602	122.956	47.4495	76.5312	0	107.572	91.075	86.313	115.551	99.035	82.6633	68.9142	67.5488	92.5483	81.6969	111.522	105.89	59.9042	109.023	103.42	99.5304	88.6382	133.879	114.15	73.7396
778	lcl|c214667_g2_i8|m.3577	0	0	0	3.3148	0	0	0	0	0	0	0	0	0	0	0	0	3.5834	0	0	0	8.2653	0	0	0	0	0	0	0	0	0	0	0	0	0
779	lcl|c227958_g2_i1|m.12924	0	8.158	0	0	0	0	7.7768	0	7.7311	0	0	0	0	0	0	14.4304	7.8899	0	0	0	0	0	7.8556	0	8.8351	16.7777	0	0	15.3623	0	0	0	0	7.9662
780	lcl|c227993_g1_i6|m.12952	85.7873	42.1295	75.6797	34.2641	50.8867	75.1763	120.484	122.916	119.776	104.977	64.9864	71.852	100.919	0	116.498	98.2331	70.3783	104.756	127.502	54.5024	72.6219	71.6017	62.6962	60.7711	78.8091	78.7671	40.847	68.4262	90.1525	83.2912	117.921	51.104	72.1747	56.0986
781	lcl|c228113_g1_i1|m.13052	19.8292	17.7054	18.4136	27.7197	27.1434	4.3441	0	0	25.1685	31.4542	29.2079	34.9645	22.4295	0	16.3198	31.3186	21.4046	13.9694	9.8238	38.7627	59.245	34.8427	17.0492	4.3896	33.5562	22.7581	12.8748	8.7868	20.8382	27.5032	30.7737	40.889	44.1601	30.2559
782	lcl|c228221_g2_i9|m.13137	33.7117	52.6768	70.4361	65.6404	49.9921	36.9274	28.6947	38.9532	33.8747	55.3853	67.3908	27.864	32.4126	0	36.4158	94.8423	52.7655	47.4989	35.4906	61.7818	96.5258	62.9384	30.797	37.3142	89.6484	75.4478	58.3693	48.5501	51.3692	109.103	63.5296	83.0324	72.9913	47.764
783	lcl|c228244_g5_i1|m.13157	85.0413	179.286	131.617	33.0226	59.2827	36.2263	160.857	158.314	89.95	53.5308	79.5324	104.133	133.602	17.6951	160.395	144.576	101.998	77.6618	152.141	98.1287	147.039	114.148	0	125.505	119.927	119.292	51.126	141.315	4.9649	65.5293	68.0844	124.484	52.6082	20.5966
784	lcl|c228245_g4_i3|m.13160	4.9318	2.7522	5.7246	4.9245	2.8129	2.7011	2.6237	5.6986	7.8247	0	10.3777	2.7176	5.5785	0	2.5369	0	0	5.7906	3.0541	0	0	0	2.6502	0	0	0	2.6685	0	5.1827	2.8502	5.467	2.8249	6.1018	0
785	lcl|c228256_g1_i10|m.13166	0	0	0	0	0	0	13.7638	0	0	7.3286	0	0	0	0	6.6542	6.3849	0	0	0	7.9025	0	0	0	0	7.8184	0	0	0	0	0	0	7.4098	0	0
786	lcl|c228278_g3_i2|m.13197	0	0	0	4.1308	0	0	0	0	0	0	0	0	0	0	4.256	0	0	0	0	0	0	0	0	0	0	0	0	0	0	0	0	4.7392	0	0
787	lcl|c228300_g4_i1|m.13216	5.2921	11.8132	12.2857	5.2842	18.1103	31.8828	16.8919	12.2298	5.5975	11.9923	11.1358	5.8321	8.9791	0	13.6109	2.612	14.2813	15.5342	19.6635	9.6985	9.8822	5.8118	14.2192	11.7152	6.3968	27.3319	8.5902	17.5879	33.3681	12.2336	17.5992	18.1876	6.5476	20.187
788	lcl|c228309_g1_i6|m.13221	26.3842	13.088	23.82	17.5634	0	9.6337	0	20.3243	40.3103	26.5728	18.5063	6.4615	16.5801	0	24.1275	11.5755	15.8225	6.8842	18.1546	17.9086	10.9486	12.878	141.783	9.7346	31.8922	50.469	12.6895	42.2194	150.957	6.7769	29.2477	43.659	10.8812	22.3654
789	lcl|c214691_g1_i1|m.3614	8.7868	4.9036	10.1994	8.7738	15.0349	0	0	0	4.647	4.9779	4.6224	9.6836	4.9696	0	4.5198	0	4.7425	0	10.883	5.3677	10.9388	0	4.7219	0	5.3106	5.0424	0	4.8671	4.617	15.2342	9.7405	5.0331	5.4357	4.7883
790	lcl|c228406_g1_i6|m.13304	0	0	25.3109	5.4433	0	5.9714	17.4003	0	5.766	0	0	0	6.1662	0	5.6082	0	0	0	13.5036	0	0	0	0	0	6.5894	6.2566	0	6.0391	5.7288	6.3009	6.043	6.245	6.7446	0
791	lcl|c228453_g2_i2|m.13342	15.377	0	17.849	0	35.0815	33.6875	16.3607	17.7678	16.2645	17.4228	32.3569	0	0	0	15.8194	15.1792	16.5987	18.0548	0	18.7871	0	0	0	17.0202	37.1741	35.2966	33.2801	17.0348	32.3188	17.7733	17.0458	17.6157	19.025	0
792	lcl|c228525_g4_i3|m.13399	16.1702	7.2192	7.5079	12.917	22.1348	7.0851	24.0866	14.9475	13.6829	36.6431	10.2078	14.2564	7.3163	0	3.3271	12.7698	24.4369	18.9862	16.0221	3.9513	12.0782	21.31	6.9516	0	19.5459	11.1352	20.9982	25.079	3.3986	14.9521	28.6802	14.8195	16.0051	31.7224
793	lcl|c228543_g5_i2|m.13413	4.3466	19.4051	20.1813	13.0204	9.9164	14.2835	13.8739	15.0671	13.7923	9.8497	18.2925	9.5803	9.8331	0	0	4.2906	9.3838	20.414	5.3834	21.242	10.8221	9.5469	9.343	9.6221	15.7618	29.9315	9.4072	19.2607	22.8386	15.0717	14.4548	14.9381	21.5109	14.2116
794	lcl|c228577_g3_i1|m.13439	4.5785	0	0	0	0	0	0	0	0	0	0	0	0	0	4.7103	4.5196	14.8269	0	0	0	5.6998	0	14.7624	0	0	0	0	0	0	0	0	0	5.6647	0
795	lcl|c228608_g2_i2|m.13456	3.8809	0	4.5047	0	0	4.251	0	0	0	4.3972	4.0831	4.2769	0	0	0	3.8309	0	0	0	0	0	0	0	8.5911	0	13.3623	0	8.5985	4.0783	0	8.6041	8.8917	0	8.4593
796	lcl|c228666_g1_i2|m.13507	37.3844	50.0705	60.7521	52.2606	68.232	81.9008	31.8208	51.8364	47.4507	42.3581	62.9328	90.639	84.5737	28.0038	15.384	73.8069	129.135	43.8947	37.042	45.6751	46.5399	65.6896	32.1432	57.9311	27.1132	25.7438	72.8193	33.132	15.7147	34.5682	41.4416	34.2617	64.7547	48.8932
797	lcl|c228678_g2_i11|m.13512	2.0148	0	2.3387	2.0118	2.2983	2.207	4.2874	6.9841	2.1311	0	0	2.2204	2.279	15.0923	0	1.9889	0	0	0	4.9232	0	0	6.4962	4.4602	4.8708	0	2.1803	0	0	2.3288	0	0	4.9855	0
798	lcl|c228683_g1_i7|m.13540	0	10.9592	0	0	0	0	0	0	0	0	0	0	0	0	0	0	0	23.0579	12.1614	0	0	0	0	10.8683	0	0	0	0	0	0	0	0	0	0
799	lcl|c228700_g2_i5|m.13572	11.28	12.5898	6.5467	0	0	0	0	0	11.9311	6.3904	5.934	6.2156	0	0	0	5.5674	12.1762	6.6222	6.9854	0	0	12.3878	0	0	0	12.9461	12.2065	12.4961	0	0	0	12.9222	0	0
800	lcl|c228700_g2_i1|m.13568	0	0	7.3333	0	14.4133	13.8406	0	0	0	0	0	0	0	0	12.9989	6.2364	0	7.4179	0	0	0	0	20.3698	6.9928	0	0	0	0	19.9174	0	0	0	0	0
801	lcl|c214720_g1_i1|m.3639	0	0	0	0	0	0	0	0	0	0	0	0	0	0	5.9253	0	0	0	0	0	0	0	12.3803	0	0	0	0	0	12.1053	0	0	6.5981	14.2519	0
802	lcl|c228728_g1_i4|m.13597	10.3819	7.725	28.1188	10.3665	23.6856	7.5815	11.0461	11.9961	7.3208	11.7631	3.641	3.8138	7.8289	0	24.9215	6.8322	18.6779	4.0633	4.2862	12.6843	0	7.601	7.4387	3.8304	16.7323	35.7462	7.4898	3.8337	14.5469	27.9995	11.5086	11.8934	8.5633	11.315
803	lcl|c228746_g3_i3|m.13615	9.7602	18.156	0	29.2373	18.5561	24.9462	17.3077	41.3519	3.4412	29.49	20.5379	10.7563	14.7202	0	6.6941	28.904	21.0713	11.4599	24.1771	19.8746	36.4516	25.0106	3.4966	10.8032	23.5955	11.2019	24.6446	36.0417	37.6085	33.8437	28.852	26.0895	24.1515	42.5498
804	lcl|c228746_g2_i5|m.13610	0	3.624	3.7689	16.2106	18.5191	10.6699	13.8186	7.5035	0	18.3946	3.4162	3.5783	0	0	6.6807	12.8206	10.5147	3.8124	0	0	20.2106	14.2633	6.9793	3.5939	11.7743	18.6327	3.5136	3.597	0	18.7646	14.3973	3.7196	24.1033	3.5388
805	lcl|c228772_g4_i5|m.13636	65.4164	69.9704	37.9664	68.0411	90.1678	11.9427	5.8001	6.299	34.5962	67.943	80.2972	36.0462	27.7481	0	19.6288	37.6687	11.7689	35.2039	43.8867	53.2825	54.2914	17.9603	23.4355	36.2035	95.5462	65.6941	11.7983	51.3324	42.9657	72.4603	51.3655	40.5927	53.9571	77.2372
806	lcl|c228794_g3_i8|m.13650	0	0	0	0	0	0	3.4894	0	0	0	0	0	0	0	0	3.2374	0	0	4.062	4.0069	0	0	0	0	0	0	3.549	0	0	7.5814	3.6355	0	8.1153	0
807	lcl|c228830_g2_i1|m.13692	18.6636	0	14.4427	0	14.1933	6.8146	0	0	6.5803	14.0978	13.091	0	0	0	6.4002	24.5648	0	7.3046	7.7053	7.6009	38.724	20.4967	0	0	0	21.4204	0	13.7839	6.5378	14.3814	34.482	21.3809	46.1827	54.2429
808	lcl|c228848_g6_i3|m.13716	0	6.891	0	0	0	0	0	0	0	0	0	0	0	0	0	0	0	0	0	0	0	0	0	0	0	7.0861	0	0	6.4882	7.1362	0	0	0	6.729
809	lcl|c228994_g6_i1|m.13852	63.5049	35.4395	61.4283	84.5477	72.4411	139.125	135.135	97.8384	78.3655	23.9846	22.2717	81.65	47.8885	0	76.2209	20.896	22.8501	12.4273	26.2181	77.5884	79.0574	116.237	68.2522	164.013	76.7621	242.95	125.989	105.527	33.3681	122.336	35.1985	109.126	78.5707	46.1417
810	lcl|c229012_g1_i8|m.13875	17.1575	19.1498	6.6386	11.4214	13.0479	0	6.085	0	30.2464	6.48	18.0518	12.6056	12.9383	0	17.6512	11.2912	12.3471	6.7151	21.2504	0	21.3594	0	43.0268	0	0	98.4589	6.1889	6.3358	36.061	26.4417	19.0195	65.518	7.076	12.4663
811	lcl|c229056_g1_i4|m.13924	68.8715	42.7049	71.0607	68.7695	43.646	67.0587	162.839	132.633	80.9409	43.3524	48.3076	67.4667	51.9354	0	141.707	45.3237	57.8225	26.9551	66.3452	56.0968	123.844	58.8277	164.489	84.7014	64.7493	245.916	115.934	33.9097	120.627	61.9144	42.4144	43.8325	9.4678	33.3606
812	lcl|c229060_g1_i1|m.13927	5.4697	0	0	2.7308	3.1197	2.9957	8.7294	0	5.7854	9.296	8.6321	12.0557	6.1869	0	2.8135	2.6996	0	12.8444	3.3872	3.3413	3.4046	0	11.7571	12.1083	0	12.5552	2.9595	6.0594	0	6.322	3.0316	9.399	6.7673	8.9419
813	lcl|c214720_g2_i1|m.3640	5.1581	11.5141	0	15.4514	0	0	5.4881	0	5.4558	5.8443	0	0	0	0	0	5.0917	0	0	12.7772	12.604	0	0	22.1748	0	12.4698	5.92	11.1636	0	10.8411	0	5.7179	11.8181	0	11.2434
814	lcl|c229073_g2_i1|m.13946	93.1405	94.5055	29.4856	33.8191	24.147	0	18.018	9.7838	17.9121	23.9846	4.4543	0	28.7331	380.561	0	25.0752	27.4201	14.9128	15.7308	31.0353	36.8935	23.2473	9.1003	14.0582	66.5272	63.1671	32.0699	14.0703	40.0418	88.0816	14.0794	24.2502	146.665	32.2992
815	lcl|c229089_g2_i5|m.13955	0	3.5741	3.7171	3.1975	3.6529	0	3.4071	0	0	0	0	3.5291	3.6222	0	3.2944	0	0	0	0	0	3.9865	0	0	0	0	14.7011	0	3.5475	0	3.7013	0	0	0	0
816	lcl|c229110_g2_i1|m.13970	11.2153	16.6902	34.7155	14.9316	17.058	16.3802	11.9328	12.9591	19.7711	42.3581	19.6665	32.9596	29.6008	0	15.384	11.071	12.1064	26.3368	37.042	27.4051	27.9239	24.6336	20.0895	24.8276	31.6321	42.9064	4.0455	28.9905	39.2866	21.6051	41.4416	55.6753	18.5013	24.4466
817	lcl|c229132_g1_i2|m.13984	11.8975	6.6395	10.3576	20.7898	16.9646	16.2905	3.1647	13.7474	25.1685	23.5907	12.5177	9.8338	6.7289	0	30.5996	5.8722	25.6855	17.4618	18.4196	7.268	11.1084	26.132	35.164	19.7534	25.1671	64.8607	28.9683	29.6555	34.383	6.8758	26.3774	37.4815	3.68	16.2085
818	lcl|c229134_g1_i1|m.13988	22.7648	5.0816	10.5698	22.7311	15.5809	4.9873	0	5.2609	9.6315	10.3174	9.5805	5.0176	5.15	0	0	4.4944	4.9147	10.6917	11.2782	5.5627	5.668	5.0001	19.5733	15.1185	5.5034	15.6764	9.8539	10.0877	14.3539	15.7874	15.1412	20.8633	5.6331	14.8865
819	lcl|c229184_g1_i1|m.14022	4.4053	9.8337	5.1135	0	0	0	9.3742	0	4.6596	0	0	4.8549	0	0	9.0641	8.6972	9.5106	0	0	5.3823	0	19.3518	4.7346	4.8761	5.3249	10.112	4.7672	4.8802	4.6295	0	0	0	0	0
820	lcl|c229340_g1_i1|m.14173	45.3912	32.2395	47.8985	32.9629	32.95	18.0804	21.9523	42.9127	43.6466	46.7548	26.0494	54.5712	51.3437	0	67.9235	57.0275	44.5432	4.8451	20.4434	45.3745	61.6448	45.3175	35.4796	36.5396	44.8913	61.5679	35.7235	9.1427	39.0281	62.004	22.8716	51.9997	35.738	35.9788
821	lcl|c229342_g3_i2|m.14179	0	2.2599	0	2.0218	0	0	0	0	0	0	0	0	0	0	0	0	0	0	0	0	0	0	0	0	0	6.9716	0	0	0	0	0	0	0	0
822	lcl|c229342_g3_i1|m.14174	0	3.9377	0	0	0	0	0	0	3.7317	0	0	0	3.9907	0	7.2591	6.9653	0	0	0	0	0	3.8746	3.7918	0	0	0	0	0	0	4.0779	0	0	8.7301	0
823	lcl|c229362_g2_i10|m.14209	2.4548	0	0	0	0	2.6889	0	5.6729	0	2.7813	0	5.4105	0	0	2.5254	2.4232	7.9494	8.6467	0	0	0	2.6958	0	2.7171	2.9672	0	5.3128	5.4388	0	5.6746	0	0	3.0371	2.6754
824	lcl|c229412_g3_i1|m.14240	0	0	0	8.7034	0	0	0	0	0	0	0	0	0	0	0	0	0	0	0	0	10.851	0	0	0	0	0	9.4323	0	0	10.0747	19.3247	0	0	0
825	lcl|c187971_g1_i1|m.759	0	0	0	51.2612	29.2806	28.1171	0	14.8298	0	0	13.5033	14.1441	0	0	0	0	13.854	0	0	0	15.9775	28.1896	0	0	0	0	41.6657	0	0	74.172	0	0	31.7582	0
826	lcl|c214827_g5_i1|m.3692	0	0	8.262	7.1072	8.1193	0	0	0	7.5286	0	7.4887	0	0	0	0	0	0	0	0	0	0	0	0	0	0	0	0	0	0	0	0	8.154	0	15.5149
827	lcl|c229503_g1_i3|m.14339	21.5176	18.0122	6.2442	21.4857	6.1364	0	0	0	11.3798	18.2853	11.3196	11.8568	6.0848	0	11.0684	0	0	0	6.6627	0	0	0	46.2523	5.9543	19.5072	18.522	5.8213	0	16.9594	6.2177	0	18.4877	0	0
828	lcl|c229507_g2_i4|m.14343	12.6353	9.4017	14.6666	12.6166	9.6089	0	26.8873	14.5999	13.3647	4.7721	0	9.2832	4.7641	0	21.6649	12.4728	18.1856	0	5.2165	5.1458	31.4595	9.2509	49.793	4.6619	15.2731	82.1763	9.1155	9.3317	44.2609	34.0769	0	24.1248	46.8988	0
829	lcl|c229561_g1_i12|m.14408	33.1517	70.9191	64.1353	71.7223	47.2709	81.7065	20.5757	22.3453	58.4421	43.8227	43.5996	60.8916	31.2492	0	28.4214	62.7234	50.6962	68.1186	54.7468	47.2544	68.7844	81.9172	29.6916	21.4051	96.8417	82.4384	44.8435	79.5728	60.9675	60.6702	48.9995	63.297	71.779	48.175
830	lcl|c229615_g3_i4|m.14451	25.3493	11.3171	11.7698	25.3117	37.5913	13.8837	32.3652	17.5744	13.4062	28.7218	10.6682	39.1107	28.6735	37.9771	36.5102	32.5301	27.3633	11.9055	15.6982	30.971	56.8033	33.4067	46.3153	30.864	21.4488	66.9153	32.9178	14.0411	2.6639	43.9495	33.7205	49.3678	53.3173	22.1021
831	lcl|c229664_g4_i13|m.14491	0	0	0	0	0	0	0	0	0	0	0	0	0	0	0	0	0	0	0	0	4.4112	0	0	0	0	0	0	0	0	0	0	4.0593	0	0
832	lcl|c229670_g1_i2|m.14513	0	0	0	22.4489	12.8229	0	35.8807	0	0	12.7366	11.827	12.3883	12.7152	42.1022	57.8228	0	48.5367	26.3974	0	13.734	27.9881	0	36.2443	0	13.5878	38.7045	12.1645	24.9061	0	25.9858	0	25.7553	13.9079	24.5028
833	lcl|c229692_g2_i9|m.14545	4.0954	0	4.7537	0	0	0	0	0	4.3318	0	4.3088	0	0	0	0	0	4.4207	9.6171	0	0	5.0983	0	4.4015	0	0	4.7003	4.4318	4.5369	0	0	0	18.7665	10.1339	8.9269
834	lcl|c229742_g2_i1|m.14577	0	0	0	5.4799	6.2603	0	5.8392	0	0	0	0	0	0	0	0	0	0	0	6.7973	0	0	0	5.8983	6.0745	0	0	0	0	5.7673	0	0	0	0	0
835	lcl|c229751_g1_i2|m.14592	70.2801	99.5598	47.0645	45.8843	111.004	47.3748	195.569	49.9738	62.9004	147.01	99.5392	145.968	100.899	0	19.466	112.069	110.878	101.562	63.6103	85.8662	121.143	115.774	29.0515	170.541	153.567	68.2518	73.128	65.8793	53.9719	162.465	101.879	102.189	103.675	79.5427
836	lcl|c229768_g1_i6|m.14605	64.3405	11.9686	80.9076	48.1839	6.1162	11.7463	39.933	12.3907	22.6848	24.3002	16.9235	23.6355	24.2593	0	27.5799	42.3419	69.4523	50.3634	26.563	26.2031	40.0488	17.6649	34.5751	0	32.4051	98.4589	17.4064	17.8193	50.7108	55.7754	29.718	30.7116	53.0697	52.5924
837	lcl|c214832_g3_i2|m.3697	116.773	130.333	141.194	213.767	177.607	143.901	119.067	157.418	97.7815	132.309	66.5491	160.863	176.115	18.2234	140.155	129.68	115.546	39.9901	54.2361	107.002	242.285	133.585	177.795	96.9389	205.845	212.201	131.63	75.4617	107.376	174.337	107.872	178.365	174.575	159.085
838	lcl|c229808_g4_i2|m.14641	0	0	2.8494	4.9022	0	0	0	2.8364	0	0	0	5.4105	0	0	0	0	0	0	0	0	21.3915	0	2.6383	0	5.9344	11.2694	5.3128	2.7194	0	2.8373	0	0	0	2.6754
839	lcl|c229841_g2_i2|m.14676	5.6992	0	0	0	0	6.2428	0	0	0	0	0	0	0	0	0	0	0	0	0	0	0	0	6.1252	0	0	6.541	0	0	0	0	0	6.5289	0	0
840	lcl|c229880_g4_i1|m.14717	0	0	0	0	0	0	0	9.5121	0	0	0	0	0	0	0	4.0631	0	4.8329	5.098	0	0	0	0	0	0	0	0	0	4.3255	0	4.5628	0	5.0925	4.486
841	lcl|c229886_g1_i6|m.14730	97.0213	64.9725	56.3093	38.7511	11.0674	31.8828	30.9685	56.0533	10.2622	43.9717	51.0392	10.6923	10.9744	0	29.9439	57.464	31.4189	11.3917	48.0664	0	0	0	0	0	0	22.2705	104.991	85.9853	101.958	44.8564	53.7755	11.1147	0	10.5741
842	lcl|c229886_g1_i5|m.14728	0	0	0	19.609	11.2007	0	0	0	0	0	0	0	0	0	0	0	0	11.529	48.6455	0	0	0	0	0	0	0	0	0	0	22.6984	0	11.2486	0	10.7015
843	lcl|c229886_g1_i1|m.14723	0	0	0	0	11.1337	0	0	0	0	0	0	0	0	0	0	0	0	11.4599	48.3543	0	24.3011	0	0	0	0	0	0	0	0	0	0	11.1812	0	10.6375
844	lcl|c230002_g4_i1|m.14846	0	0	0	6.6703	0	0	14.215	0	0	0	21.0851	0	0	0	0	0	7.2109	0	8.2737	0	16.6323	7.3362	0	0	0	15.3338	0	0	7.0201	0	0	22.9581	0	7.2806
845	lcl|c230011_g2_i5|m.14861	16.8037	12.5033	26.0068	16.7788	38.3365	30.6776	23.8383	6.4721	41.4718	31.7322	47.1455	6.1729	57.0218	0	40.3369	27.6459	6.0462	65.7667	20.8123	27.3737	13.946	18.454	12.0399	55.7982	40.6233	38.5715	18.184	49.641	23.545	25.8965	12.4182	38.5003	6.9301	54.9419
846	lcl|c230039_g1_i2|m.14881	0	12.418	12.9146	0	6.3458	6.0936	5.9189	6.4279	0	0	0	12.2614	0	0	5.7231	5.4914	0	6.5318	20.6702	6.7967	6.9254	12.2187	0	0	13.4487	6.3847	12.0399	12.3255	5.8461	6.4299	0	0	13.7655	6.063
847	lcl|c230054_g1_i7|m.14897	29.6356	13.2308	10.32	50.3059	16.9029	35.7088	31.5315	37.6678	47.0193	33.5784	31.1803	9.798	20.1132	0	33.5372	14.6272	28.7911	52.1948	73.4105	28.9663	29.5148	29.2916	22.2957	3.2803	21.4934	30.6118	32.0699	39.3969	52.9441	20.5524	26.2815	27.1602	25.6664	25.8393
848	lcl|c230073_g1_i10|m.14919	0	0	0	0	0	0	3.1247	0	0	0	3.0899	0	0	0	0	0	0	0	0	0	0	0	0	0	0	3.3707	0	0	0	0	0	0	0	0
849	lcl|c230102_g4_i1|m.14957	174.638	203.039	228.053	174.38	182.612	215.209	317.427	336.32	177.022	189.628	199.053	216.518	164.617	0	149.72	136.477	125.675	196.507	216.299	195.587	117.763	167.816	125.129	306.06	140.731	175.38	188.983	257.956	298.228	151.39	185.525	150.048	171.055	214.126
850	lcl|c214891_g1_i1|m.3715	16.8908	18.8521	9.8031	59.0301	28.9014	27.7529	26.957	39.034	35.7314	19.138	8.8856	18.6145	19.1058	0	26.0652	0	36.4654	19.8322	0	0	10.5137	0	9.0767	9.3479	10.2084	29.0785	0	9.3559	17.7502	9.7615	0	38.6997	10.4489	18.4089
851	lcl|c230124_g3_i6|m.14973	46.6814	43.4184	51.9282	42.7279	42.1564	42.6119	37.2509	40.4547	22.6306	44.0767	26.6037	27.8662	37.4021	0	16.0082	42.2408	18.8963	25.1216	31.3177	23.7641	24.2141	38.4496	29.2665	40.9053	65.831	51.3443	25.2579	51.7143	32.7045	29.2262	30.1861	60.1624	16.8455	33.918
852	lcl|c230150_g4_i2|m.14989	4.4413	4.957	5.1553	0	15.1988	14.5949	4.7254	5.1319	4.6977	15.0966	4.6728	14.6837	10.0474	0	4.5691	4.3842	4.7942	15.6442	5.5008	10.8525	5.529	4.8775	0	9.8318	0	25.4866	24.0306	19.6806	9.3346	0	9.8466	5.0879	21.9798	19.3619
853	lcl|c230186_g5_i1|m.15032	3.1527	3.5188	0	6.2961	14.3855	13.8138	0	0	6.6694	7.1443	6.6341	0	3.5662	0	3.2434	3.1122	3.4032	14.807	11.7144	3.8519	3.9248	6.9247	0	0	3.8109	3.6184	3.4117	13.9705	6.6263	0	6.9898	0	0	3.4361
854	lcl|c230220_g1_i2|m.15064	7.9124	0	0	7.9007	0	0	0	0	16.7383	0	0	8.7199	0	0	0	7.8106	8.5411	9.2903	0	0	9.8502	0	0	0	0	18.1623	0	8.7655	8.315	0	8.7711	18.1288	9.7895	0
855	lcl|c230220_g1_i3|m.15065	0	0	0	0	0	0	0	9.8607	0	0	8.9786	0	0	0	0	0	0	10.0199	0	0	10.6238	0	0	37.7831	0	19.5887	18.4696	0	8.9681	0	9.46	19.5525	0	0
856	lcl|c230276_g3_i1|m.15112	0	0	0	21.6046	0	0	0	0	0	0	15.1763	0	8.158	0	7.4197	7.1194	7.7852	0	0	0	8.9785	0	15.5027	0	8.7178	16.555	0	0	0	8.3361	0	0	8.9232	0
857	lcl|c230360_g10_i5|m.15205	25.8041	24.0004	24.9603	0	4.9059	47.1092	13.7274	14.9081	0	29.2371	0	9.4792	0	0	4.4244	12.7361	4.6424	25.2481	5.3266	0	0	23.6153	32.3553	23.8013	10.397	0	27.9237	14.2931	13.5586	4.9709	14.3023	0	0	14.0616
858	lcl|c230398_g2_i4|m.15241	0	0	0	0	39.2814	0	0	0	0	0	60.3844	0	0	0	0	0	0	0	0	0	0	37.8178	0	0	1068.36	0	0	0	0	185.743	241.762	0	0	0
859	lcl|c230398_g2_i8|m.15247	0	819.185	0	0	0	0	0	11.014	0	0	0	0	0	0	0	0	0	0	188.893	0	0	31.4043	0	0	368.698	0	0	0	0	0	0	0	35.3798	0
860	lcl|c231380_g1_i2|m.16168	0	34.0043	0	0	0	0	0	0	0	0	0	0	0	0	0	0	0	0	18.8672	0	0	0	0	0	147.307	0	0	0	0	0	0	0	0	0
861	lcl|c230405_g2_i9|m.15259	0	15.8194	0	14.1526	16.168	15.5255	0	0	0	0	0	0	0	0	0	13.9912	30.5993	0	0	17.3168	17.6447	0	0	15.6882	34.2648	0	15.3378	15.7017	0	16.3823	0	16.2371	70.1442	0
862	lcl|c230413_g1_i5|m.15274	0	3.8872	8.0854	0	0	0	0	0	11.0516	0	3.6644	0	0	0	3.583	0	3.7595	0	0	0	4.3358	3.8249	0	0	4.2099	11.9918	0	0	3.66	0	0	11.9696	8.6181	11.3875
863	lcl|c230419_g4_i4|m.15280	0	0	0	0	0	0	16.0083	0	0	11.365	0	0	0	0	0	4.9507	0	0	12.4233	0	0	5.5078	0	0	0	0	0	5.556	0	0	5.5596	5.7454	0	0
864	lcl|c214925_g1_i1|m.3737	7.951	0	9.2292	39.6962	36.2794	0	0	0	25.2299	18.0177	16.7309	8.7624	8.9937	0	40.899	15.6975	51.4963	0	0	0	39.593	17.4638	25.6362	0	9.6109	45.6273	0	35.233	8.3556	36.7604	17.6279	45.543	19.6746	8.6656
865	lcl|c230431_g5_i1|m.15286	0	0	0	0	0	0	0	0	0	0	0	0	2.382	0	0	0	0	2.4726	0	0	0	2.3127	0	0	0	0	0	0	0	0	0	0	0	0
866	lcl|c230434_g3_i8|m.15304	14.3609	16.0285	8.3348	21.5094	24.5725	15.7307	22.9194	16.5937	15.1898	8.1357	15.1094	7.9132	16.2441	0	0	7.0881	7.7509	8.4309	8.8933	8.7728	17.8779	15.7713	0	15.8955	0	16.4821	7.7702	31.8183	7.5458	8.2994	7.9597	16.4517	26.6517	7.8258
867	lcl|c230438_g3_i4|m.15312	0	0	0	4.0791	0	0	4.3465	4.7203	4.3209	4.6286	8.5961	4.502	0	0	0	4.0326	0	4.7965	5.0596	0	5.0856	4.4863	4.3905	4.5217	9.8758	0	0	4.5255	4.293	9.4434	4.5285	18.7194	5.0543	4.4523
868	lcl|c230481_g5_i1|m.15356	105.159	83.8355	95.9075	67.5018	85.683	82.2782	15.9837	0	63.5592	110.639	118.543	99.3346	93.4597	0	69.5472	111.221	48.6486	79.3746	18.6064	91.7712	65.4561	90.7395	16.1457	74.8261	90.7939	172.416	195.08	133.138	39.4677	173.638	83.2652	146.283	92.933	163.728
869	lcl|c230636_g2_i1|m.15503	30.073	33.5651	20.9446	54.0513	41.1658	52.7067	44.7957	55.5982	50.8942	47.7037	88.5936	19.8852	61.2301	0	61.8768	23.7489	38.9548	14.1241	52.1459	58.7877	44.9256	13.2106	51.7138	19.972	29.0809	6.903	19.526	46.6415	69.5272	55.6153	40.0042	6.8903	22.3245	26.2207
870	lcl|c230792_g1_i1|m.15630	29.4571	38.3573	17.0963	4.9022	0	0	5.2236	0	0	0	0	97.3898	72.1933	0	10.1016	0	0	0	0	59.983	116.126	118.617	0	0	0	0	0	0	5.1593	68.0952	32.654	50.6186	24.2969	21.4031
871	lcl|c230823_g3_i1|m.15672	209.566	161.132	221.633	158.104	138.121	71.4175	173.423	199.101	216.737	84.4257	127.394	87.2489	115.89	0	182.059	142.511	110.594	185.913	155.735	170.694	104.356	107.403	400.413	149.486	191.394	197.762	176.385	113.501	308.322	183.014	108.411	224.071	138.284	157.343
872	lcl|c230829_g2_i5|m.15683	0	1.6243	1.6893	2.9063	3.3202	0	4.6453	0	1.5393	3.2979	4.5935	0	0	0	0	2.8732	3.1419	1.7088	0	1.7781	1.8117	1.5983	4.6923	0	3.5183	8.3514	1.5749	1.6122	4.5881	0	1.6133	1.6672	1.8006	0
873	lcl|c230880_g3_i5|m.15737	12.1639	13.5763	21.179	6.0729	6.9378	6.6621	19.4131	35.1379	0	20.6733	19.1968	20.1078	0	0	18.7708	18.0111	26.2606	28.5643	37.664	0	15.1428	13.3585	19.6098	20.1956	22.0548	34.9015	26.3261	47.1636	57.5227	14.0595	20.226	20.9022	7.5248	19.8857
874	lcl|c230947_g2_i4|m.15815	0	0	0	4.6237	0	0	4.9268	0	0	0	0	5.1031	0	0	0	0	0	0	0	0	11.5292	0	0	0	0	5.3145	0	0	4.8662	0	0	0	0	0
875	lcl|c214971_g5_i1|m.3758	0	0	0	0	0	0	0	0	0	0	0	0	0	0	0	0	0	0	0	0	0	0	0	0	3.7672	7.1538	0	0	0	0	0	0	0	0
876	lcl|c230953_g1_i2|m.15824	3.0988	6.9172	3.5969	0	3.5348	0	0	0	0	0	0	6.83	0	0	0	0	0	0	7.676	0	0	0	0	0	0	0	0	3.4329	3.2565	3.5817	0	0	7.6679	0
877	lcl|c231028_g3_i4|m.15898	0	0	2.9655	0	0	0	2.7182	0	0	0	0	0	0	0	0	0	0	0	0	0	0	2.8057	0	0	3.0881	2.9322	0	0	0	0	0	0	0	0
878	lcl|c231030_g9_i2|m.15907	2.8006	0	0	2.7965	6.3894	0	2.9798	6.4721	0	0	0	0	0	0	0	2.7646	3.0231	0	0	3.4217	0	3.0757	3.01	6.1998	0	0	6.0613	0	2.9431	0	3.1046	6.4167	3.465	3.0523
879	lcl|c231043_g3_i4|m.15925	54.8699	57.639	41.2117	80.5715	66.2728	98.9946	41.2095	11.1885	51.2092	51.1988	44.1464	64.0266	83.9708	0	63.0898	54.1641	41.8089	125.061	139.916	47.3212	72.3258	56.7142	52.0339	82.1688	97.5361	62.9747	48.8987	89.3907	67.8375	70.882	78.7145	70.2534	83.8606	77.3901
880	lcl|c231142_g1_i4|m.15993	20.9506	9.3534	29.1824	20.9196	14.3392	9.1796	4.4582	14.5249	17.7279	23.738	17.6341	18.471	18.9584	0	12.9321	4.1362	18.0921	4.9198	10.3794	10.2387	41.7304	23.0083	13.5101	9.2758	25.3243	57.7085	4.5343	18.5675	17.6133	19.3724	27.8692	33.6011	25.9209	22.8336
881	lcl|c215957_g2_i7|m.4321	66.1432	58.0044	93.2286	51.8927	70.0614	41.4015	90.4818	38.2137	34.9806	64.237	34.7954	26.0333	37.4085	0	82.6279	93.2748	142.797	77.6618	35.1094	17.3168	58.8157	20.7541	203.108	41.8351	125.638	92.1803	132.928	68.0405	94.3335	87.3724	162.355	59.5359	93.5256	66.9389
882	lcl|c231190_g4_i3|m.16030	47.59	17.7054	32.2237	11.8799	22.6195	47.7854	25.3173	64.1544	20.9737	35.9477	12.5177	0	13.4577	0	77.5191	39.1482	34.2473	23.2824	14.7357	0	24.6854	21.7767	29.8361	4.3896	0	4.5516	21.458	65.9011	16.6705	18.3355	17.585	22.7161	34.3468	38.9005
883	lcl|c231190_g4_i6|m.16031	0	0	0	51.1514	26.5617	0	14.8649	0	39.4067	0	78.3963	35.926	36.8741	0	0	50.5683	55.2972	0	51.9117	56.8981	28.9877	25.572	0	0	45.0338	37.4144	0	0	19.576	21.5311	20.6498	0	0	0
884	lcl|c231257_g1_i5|m.16082	19.2666	12.9023	26.8368	19.2381	17.5822	12.6627	32.7988	48.977	24.4545	17.464	8.1084	8.4931	13.0759	0	47.5705	26.6263	29.1163	9.0487	4.7726	28.2473	23.9851	29.6225	57.9794	12.7953	9.3155	17.69	12.5095	12.8063	28.3458	35.6306	17.0861	13.243	19.0699	4.1997
885	lcl|c231285_g1_i2|m.16098	4.3582	4.8643	15.1764	8.7034	9.9429	4.7739	9.274	0	4.6097	9.876	13.756	4.8029	4.9297	0	4.4836	8.6042	4.7044	0	0	5.3247	10.851	9.5724	0	4.8239	10.536	10.0038	4.7162	4.8281	4.5799	15.112	9.6623	4.9927	0	14.2496
886	lcl|c231326_g2_i1|m.16129	0	16.4388	17.0963	9.8045	11.2007	21.5113	0	0	10.3858	11.1254	10.3308	21.6422	11.1067	0	45.4571	29.0782	15.8987	0	6.0807	0	24.4475	5.3917	0	0	17.8033	11.2694	0	5.4388	5.1593	11.3492	5.4423	0	18.2227	5.3508
887	lcl|c231339_g4_i2|m.16143	3.8442	0	0	11.5156	4.3852	0	0	0	0	4.3557	0	12.7097	8.6967	0	3.9549	0	20.7483	4.5137	0	0	28.7142	4.2218	12.3949	0	9.2935	13.2362	0	0	4.0399	13.33	4.2615	26.4235	23.7812	4.1898
888	lcl|c214971_g6_i7|m.3760	5.8843	13.1352	0	0	0	6.4456	25.0431	13.5985	0	6.6672	6.191	0	6.656	0	6.0536	0	6.3518	20.7272	0	14.3786	7.3254	6.4622	12.6484	13.0263	0	6.7535	6.3677	0	0	0	0	0	0	6.4132
889	lcl|c231352_g2_i1|m.16156	33.1292	44.3715	76.9103	105.856	75.5822	79.8367	155.094	168.433	28.0332	37.5368	34.8561	131.437	112.421	0	197.679	85.028	100.132	85.5769	82.0646	56.6668	90.7339	101.872	128.181	102.675	112.127	98.8591	236.613	66.0619	41.778	76.5841	58.7595	83.4955	98.373	72.2136
890	lcl|c231382_g2_i7|m.16188	0	0	0	0	5.6343	0	0	0	0	0	0	0	0	0	0	14.6272	0	0	0	0	0	0	0	0	0	0	0	0	0	5.709	0	0	0	0
891	lcl|c231430_g2_i6|m.16242	37.0445	41.3461	35.8332	101.722	77.4717	27.0521	101.821	96.3097	91.4265	52.4663	51.9672	34.0208	34.9187	0	73.0451	57.8993	59.9815	7.2493	34.4112	26.4016	76.8614	61.0242	23.2247	0	48.5094	46.0594	36.7468	23.9391	58.3942	78.4987	34.2207	45.9743	34.3747	37.0095
892	lcl|c231430_g2_i12|m.16236	0	0	3.9417	16.9536	15.4943	3.7197	7.226	7.8475	3.5918	3.8475	3.5727	11.2269	0	38.1552	31.4411	3.3521	14.6621	0	4.2058	4.1488	21.1369	3.7293	7.2992	0	4.1046	15.5893	7.3494	0	3.5685	54.9491	3.7643	11.6704	8.4027	3.7009
893	lcl|c231440_g4_i2|m.16256	7.6524	12.8115	8.8826	7.6411	17.4584	8.3823	8.1419	8.8422	12.1411	13.0057	4.0256	12.65	8.6559	0	3.9363	22.6618	8.2604	4.4925	4.7389	4.6747	14.2897	12.6059	8.2244	21.1754	13.8748	8.7827	8.281	8.4774	8.0418	17.6898	12.7243	21.9162	18.9356	16.6803
894	lcl|c231469_g3_i4|m.16290	70.1057	156.493	74.5947	64.1684	59.9781	89.5919	31.0795	40.503	86.5111	52.9552	92.1999	38.6301	33.0413	0	54.0923	46.1359	44.1441	61.7358	123.009	64.2398	36.3645	44.9115	31.3944	71.131	70.6175	87.1661	50.5762	77.6641	239.437	74.2783	77.7142	66.927	21.6844	44.5705
895	lcl|c231477_g1_i1|m.16301	64.8525	14.4766	100.371	43.1709	14.7957	47.3591	27.6005	39.9658	45.7306	34.291	50.0374	38.1178	34.2333	0	44.4791	89.6255	102.674	10.1528	21.4195	47.5409	59.2057	33.2369	32.5269	19.1421	83.6171	44.6591	32.7505	38.3171	9.087	79.9562	47.9272	54.4825	42.7936	65.9691
896	lcl|c231506_g1_i1|m.16344	9.4765	21.1538	11	23.6562	10.81	15.5707	10.0828	10.9499	25.0588	21.4746	4.9852	10.4436	0	0	4.8746	23.3865	10.2294	11.1268	5.8686	28.9453	29.4933	15.6108	10.1849	31.4676	22.9096	38.0669	25.6373	36.7437	14.9381	10.9533	5.2525	37.9966	17.587	15.4923
897	lcl|c231559_g1_i5|m.16408	15.3408	25.6832	40.0657	19.1476	43.7487	21.0052	20.4028	22.1575	32.4526	8.6909	28.2457	0	8.6763	0	23.6733	22.7152	20.6995	13.5092	9.5002	18.7429	9.5489	8.4237	41.219	0	18.5433	52.8203	16.6009	4.2487	60.4552	13.2986	42.5142	8.7871	0	8.3598
898	lcl|c231575_g5_i2|m.16426	22.4049	31.2582	32.5085	22.3717	31.9471	24.5421	35.7574	84.1377	5.9245	25.3857	23.5728	18.5186	19.0073	0	0	22.1167	0	6.5767	0	13.6868	34.865	36.9081	6.02	24.7992	27.0822	19.2858	36.368	55.8461	17.6587	25.8965	24.8365	19.2501	20.7902	36.6279
899	lcl|c231634_g1_i2|m.16472	30.6671	29.094	30.2576	22.9663	24.4878	21.8351	26.1032	28.3483	25.9498	33.0098	37.1055	35.4867	15.6099	0	14.1973	33.2999	26.4829	27.0058	18.9914	13.1139	40.0865	42.0988	21.4238	25.4582	42.6296	66.8742	16.5931	27.1788	19.3366	30.1293	28.8961	42.1583	30.354	28.4099
900	lcl|c214975_g3_i2|m.3761	7.2766	8.1216	0	0	8.3005	0	0	0	0	0	7.6559	0	0	0	0	0	0	8.5438	0	0	0	0	0	0	0	0	15.7486	8.0611	7.6469	0	0	8.336	9.0029	7.9306
901	lcl|c231859_g5_i5|m.16713	8.1907	9.1419	33.2762	12.2679	14.015	26.9161	4.3574	9.4643	21.6588	27.8414	43.0884	4.5133	4.6324	0	4.2132	12.1281	4.4207	38.4685	10.1447	5.0036	5.0983	4.4976	8.803	13.5991	24.7516	18.8012	17.7271	40.8322	38.7339	18.9344	13.6195	9.3832	5.067	22.3173
902	lcl|c238311_g1_i2|m.24377	0	4.0699	4.2326	0	4.1596	0	0	4.2134	3.8569	4.1316	7.673	4.0186	12.3739	0	0	0	0	0	4.5163	4.4551	0	0	3.919	4.0361	4.4077	0	0	0	0	4.2147	4.0422	0	4.5115	0
903	lcl|c214714_g4_i1|m.3630	0	0	0	6.9852	0	0	0	0	0	0	0	0	0	0	0	6.9055	0	0	0	0	0	0	0	7.7431	0	0	0	0	0	0	7.7547	0	0	0
904	lcl|c221076_g3_i4|m.7373	0	0	0	0	0	0	0	7.4149	0	21.8128	6.7516	0	0	0	0	19.0038	6.927	7.5347	87.4279	125.445	31.955	42.2845	0	42.6175	31.0272	14.7301	13.8886	63.9812	60.6932	22.2516	78.2496	29.4057	0	0
905	lcl|c243020_g2_i5|m.30523	0	0	2.4476	2.1055	0	0	2.2435	2.4365	0	0	0	0	0	0	0	0	0	0	0	0	0	0	0	0	0	0	0	0	0	0	2.3375	0	0	0
906	lcl|c225899_g3_i1|m.11041	0	0	0	0	0	0	0	0	0	0	0	0	0	0	0	0	0	0	0	0	7.7154	0	0	0	0	0	0	0	0	0	0	0	7.6679	0
907	lcl|c221146_g4_i1|m.7411	0	0	0	0	0	0	0	0	0	0	2.8968	0	9.3431	0	2.8325	0	0	0	0	0	0	0	0	0	0	0	0	0	0	0	0	0	0	0
908	lcl|c231864_g5_i1|m.16720	0	0	0	5.1998	17.821	5.7043	5.5407	0	16.5244	0	0	17.2169	5.8904	0	26.7869	0	5.6213	12.2288	0	0	6.4829	5.719	0	0	0	5.9767	11.2706	0	10.945	6.0191	5.7727	0	0	0
909	lcl|c231896_g2_i12|m.16763	0	6.1048	12.6979	16.3847	6.2393	0	5.8196	0	5.7854	12.3947	11.5095	18.0836	0	0	0	10.7986	5.9042	0	0	13.3653	20.4276	12.0137	5.8785	0	13.223	12.5552	5.9189	12.1187	0	31.6102	12.1265	0	6.7673	5.9613
910	lcl|c231963_g1_i7|m.16837	58.9788	86.7725	127.585	96.3677	110.091	73.4144	59.8995	86.735	102.081	85.0506	59.2324	88.6333	94.0047	220.898	118.594	105.855	89.7092	72.3974	76.3687	81.8847	93.4472	73.6037	129.657	86.0528	74.5317	101.536	78.3287	100.976	112.691	105.353	71.3232	119.775	122.724	52.5924
911	lcl|c231982_g2_i3|m.16868	4.1265	9.2113	4.7899	0	4.7071	0	4.3905	0	4.3647	4.6755	4.3416	4.5476	4.6676	0	8.4904	0	0	0	5.1109	5.0416	10.2741	4.5318	4.435	0	4.9879	0	0	4.5714	17.3458	4.7695	0	0	0	4.4974
912	lcl|c232046_g3_i8|m.16952	378.244	317.712	402.841	194.682	231.303	345.982	427.335	581.237	371.205	503.676	283.085	257.842	207.307	43.8145	196.57	207.86	214.671	196.875	342.904	195.332	145.632	218.402	347.847	435.929	452.493	344.606	573.883	501.101	336.023	139.72	177.227	285.897	197.805	191.245
913	lcl|c232109_g7_i6|m.17002	31.0468	8.663	45.0474	23.2506	0	8.5021	49.5495	44.8426	24.6292	8.7943	48.9977	25.6614	26.3387	0	39.9253	15.3237	50.2702	27.3401	28.8399	28.4491	28.9877	25.572	25.0258	17.1823	75.0563	80.1736	0	42.9927	32.6266	8.9713	25.8122	44.4586	76.8246	76.1338
914	lcl|c232116_g4_i2|m.17015	0	25.8965	6.7331	0	6.6168	6.3539	24.6866	73.727	12.2708	26.2892	18.3087	19.1776	13.1225	0	5.9675	17.1778	6.2614	61.2964	57.4744	28.3478	7.2211	6.3703	18.7026	25.6817	42.0689	19.9721	6.277	38.5557	91.4358	13.409	32.1504	13.2901	7.1767	6.3219
915	lcl|c232149_g3_i2|m.17053	3.6302	4.0517	4.2138	3.6248	0	7.953	0	0	0	4.1132	3.8194	4.0007	0	0	0	0	0	8.5248	13.4886	0	0	0	0	4.0181	4.388	4.1664	0	0	7.6298	4.1959	8.0484	0	0	7.9129
916	lcl|c232249_g2_i1|m.17180	243.143	226.147	245.645	233.791	154.087	241.675	134.14	145.677	138.114	142.847	146.858	119.092	96.7691	0	277.933	213.347	228.438	74.0147	139.419	104.523	145.739	108.787	125.82	174.434	261.246	124.025	107.195	99.762	217.661	286.238	184.679	92.8473	155.984	93.2393
917	lcl|c215059_g3_i1|m.3798	12.9362	14.4383	0	25.834	29.513	0	13.7638	14.9475	13.6829	0	0	0	14.6326	0	0	0	0	0	0	0	0	14.2067	0	0	15.6367	14.847	13.9988	0	13.5944	0	0	14.8195	0	0
918	lcl|c232274_g1_i4|m.17210	25.941	28.9533	25.0927	30.2197	34.5232	28.4155	46.0009	19.9829	41.1575	83.278	36.3908	28.5883	19.5619	0	17.7916	25.6073	14.001	5.0764	48.1939	15.847	21.5293	33.2369	18.5868	9.571	78.391	34.7348	4.6786	33.5274	77.2394	29.9836	43.1345	29.7177	21.3968	37.6966
919	lcl|c232369_g2_i7|m.17306	31.8262	2.5373	5.2775	4.5399	25.932	4.9803	14.5124	5.2535	2.4045	12.8788	45.4441	17.5371	30.857	0	7.0162	4.4881	7.3617	18.6843	25.3405	33.3295	2.83	27.4623	2.4432	2.5162	38.4703	20.8727	2.46	22.6656	19.1118	13.1379	20.1602	41.6683	8.4379	44.5972
920	lcl|c232426_g1_i1|m.17360	0	6.5676	0	5.8756	6.7124	6.4456	6.2608	0	0	0	0	6.4848	0	0	0	5.8086	0	6.9091	0	0	7.3254	0	0	0	7.1127	0	6.3677	0	6.1837	6.8013	13.0459	6.741	0	6.4132
921	lcl|c232498_g1_i2|m.17421	0	6.9172	0	0	0	6.7887	19.7821	0	0	0	0	0	0	0	0	0	0	0	0	7.572	7.7154	0	0	0	0	7.113	0	0	0	7.1634	0	0	0	0
922	lcl|c232520_g2_i5|m.17456	0	0	0	2.8704	3.2792	0	3.0586	0	0	0	9.0736	12.6723	6.5034	0	2.9574	5.6755	3.1031	0	0	0	17.8937	6.3141	6.1792	6.3638	6.9497	13.1973	3.1108	0	0	3.3227	3.1867	6.5865	7.1134	0
[truncated: 1,684 more rows]

## Sheet: F_MC.MASTER.ANNOTATE
PROTID	m.ID	concat.id	KO.1	KO.GENE.1	DESCRIPTION.1	KO.EC.1	SCORE.KO.1	KO.2	KO.GENE.2	DESCRIPTION.2	SCORE.KO.2		KO.ALL	MET.PATH.1	MET.PATH.2	UNIPROT.ID	UNIPROT.DESC	Ca_BIND	GO.ONTOLOGY	BP.GO.ONTOLOGY
[truncated: 3,096 more rows]

[truncated: 3 more sheets: G_QSPEC.T1.R.S, H_QSPEC.T2.R.S., I_ABACUS_output_]
