# Supplementary material for: Resilience in a time of stress: revealing the molecular underpinnings of coral survival following thermal bleaching events
Source: Research Square preprint supplement (doi:10.21203/rs.3.rs-4566379/v1), 2024-07-03
Supplement: Supplementary file 2 [file 5e4038f1eec40c5afeedd9d1.xlsx]

## Sheet: README
TAB	DESCRIPTION
A_Symbiont_density	Symbionts per dry tissue mass (g) of each colony examined from resilient and susceptible cohorts at timepoint 1 and 2
B_Symbiont_clade_abundance	Abundance of symbiont clades C and D of each colony examined from resilient and susceptible cohorts at timepoint 1 and 2
C_Chlorophyll	Chorophyll a and c concetrations determined from each colony examined from resilient and susceptible cohorts at timepoint 1 and 2
D_Lipid_raw_data	Raw lipid data of each colony examined from resilient and susceptible cohorts at timepoint 1 and 2
E_Lipid_Biomass (g_gdw)	Shortened table of lipid data of each colony examined from resilient and susceptible cohorts at timepoint 1 and 2

## Sheet: A_Symbiont_density
Colony No.	Bleaching Status	Time	Tolerance	Symbionts per dry tissue mass (g)	Date
5	na	1	S	2.02312e+08	2017-09-01
6	na	1	S	7.09024e+08	2017-09-01
10	na	1	R	5.77778e+08	2017-09-01
13	na	1	R	2.04573e+08	2017-09-01
20	na	1	S	9.40767e+08	2017-09-01
21	na	1	R	1854043393	2017-09-01
23	na	1	S	2.55517e+08	2017-09-01
25	na	1	S	7.63612e+08	2017-09-01
26	na	1	R	1424668228	2017-09-01
28	na	1	S	8.05031e+08	2017-09-01
30	na	1	S	4.33962e+08	2017-09-01
32	na	1	R	1.63282e+08	2017-09-01
45	na	1	S	2.25225e+08	2017-09-01
55	na	1	S	5.38533e+08	2017-09-01
65	na	1	R	5.92593e+08	2017-09-01
66	na	1	R	5.88406e+08	2017-09-01
69	na	1	R	3.73832e+08	2017-09-01
73	na	1	S	4.42287e+08	2017-09-01
74	na	1	R	9.57821e+08	2017-09-01
5	B	2	S	6.1082e+07	2017-10-01
5	NB	2	S	7.23968e+08	2017-10-01
6	NB	2	S	5.12821e+08	2017-10-01
10	B	2	R	1.05485e+08	2017-10-01
10	NB	2	R	2399577167	2017-10-01
13	B	2	R	1.9337e+08	2017-10-01
13	NB	2	R	5.69106e+08	2017-10-01
20	B	2	S	2.49688e+07	2017-10-01
20	NB	2	S	1.4772e+08	2017-10-01
21	B	2	R	1.46924e+08	2017-10-01
21	NB	2	R	6.22837e+08	2017-10-01
23	B	2	S	2.24467e+07	2017-10-01
23	NB	2	S	3.71163e+08	2017-10-01
25	B	2	S	2.08333e+07	2017-10-01
25	NB	2	S	4.8105e+08	2017-10-01
26	B	2	R	4.95663e+07	2017-10-01
26	NB	2	R	7.93061e+08	2017-10-01
28	NB	2	S	7.55694e+08	2017-10-01
30	B	2	S	0	2017-10-01
30	NB	2	S	2.57599e+08	2017-10-01
32	B	2	R	8.80503e+07	2017-10-01
32	NB	2	R	2.82776e+08	2017-10-01
41	B	2	R	136402387	2017-10-01
41	NB	2	R	4.72574e+08	2017-10-01
45	B	2	S	0	2017-10-01
45	NB	2	S	1.70543e+08	2017-10-01
55	B	2	S	2.49688e+07	2017-10-01
55	NB	2	S	2.39044e+08	2017-10-01
65	B	2	R	2.14724e+08	2017-10-01
65	NB	2	R	869776482	2017-10-01
66	B	2	R	6.86275e+08	2017-10-01
66	NB	2	R	302214243	2017-10-01
69	B	2	R	2.2742e+07	2017-10-01
69	NB	2	R	8.03109e+08	2017-10-01
73	B	2	S	3.06212e+08	2017-10-01
73	NB	2	S	1478431373	2017-10-01
74	B	2	R	2.0929e+08	2017-10-01
74	NB	2	R	3.77358e+08	2017-10-01

## Sheet: B_Tank_temp_LightIntensity
	DateTime	Temp2	intens2	Temp3	intens3	Temp6	intens6	Temp8	intens8	Temp10	intens10	Temp14	intens14
1	2017-08-25 12:00:00	28.258	1087.2	28.06	1722.2	28.258	1044.1	NA	1463.9	28.456	1980.6	28.357	2755.6
2	2017-08-25 13:00:00	28.357	2325	28.456	2927.8	28.655	2927.8	NA	5511.1	28.655	3961.1	28.754	3444.5
3	2017-08-25 14:00:00	28.159	678.1	28.258	818.1	28.357	645.8	NA	1291.7	28.357	871.9	28.555	850.4
4	2017-08-25 15:00:00	28.159	452.1	28.159	538.2	28.456	430.6	NA	818.1	28.258	549	28.555	430.6
5	2017-08-25 16:00:00	27.961	409	28.06	710.4	28.06	1087.2	NA	731.9	28.06	441.3	28.357	366
6	2017-08-25 17:00:00	27.764	376.7	27.764	549	27.862	409	NA	753.5	27.862	462.9	28.06	409
7	2017-08-25 18:00:00	27.468	150.7	27.468	183	27.567	139.9	NA	236.8	27.567	161.5	27.665	129.2
8	2017-08-25 19:00:00	27.37	0	27.173	0	27.567	0	NA	0	27.468	0	27.567	0
9	2017-08-25 20:00:00	27.468	0	27.272	0	27.665	0	NA	0	27.468	0	27.567	0
10	2017-08-25 21:00:00	27.37	0	27.173	0	27.567	0	NA	0	27.468	0	27.567	0
11	2017-08-25 22:00:00	27.272	0	27.075	0	27.468	0	NA	0	27.37	0	27.37	0
12	2017-08-25 23:00:00	27.173	0	26.977	0	27.37	0	NA	0	27.272	0	27.37	0
13	2017-08-26	27.272	0	26.977	0	27.37	0	NA	0	27.272	0	27.37	0
14	2017-08-26 01:00:00	27.272	0	26.977	0	27.37	0	NA	0	27.272	0	27.37	0
15	2017-08-26 02:00:00	27.272	0	26.977	0	27.37	0	NA	0	27.272	0	27.272	0
16	2017-08-26 03:00:00	27.173	0	26.977	0	27.37	0	NA	0	27.173	0	27.272	0
17	2017-08-26 04:00:00	27.173	0	26.879	0	27.272	0	NA	0	27.173	0	27.272	0
18	2017-08-26 05:00:00	27.075	0	26.781	0	27.173	0	NA	0	27.075	0	27.173	0
19	2017-08-26 06:00:00	27.075	0	26.781	0	27.173	0	NA	0	27.075	0	27.075	0
20	2017-08-26 07:00:00	27.075	290.6	26.879	753.5	27.173	269.1	NA	161.5	27.075	333.7	27.075	139.9
21	2017-08-26 08:00:00	27.37	1097.9	26.879	839.6	27.173	527.4	NA	409	27.173	968.8	27.075	473.6
22	2017-08-26 09:00:00	27.37	1291.7	27.075	1334.7	27.173	635.1	NA	409	27.764	3444.5	27.173	721.2
23	2017-08-26 10:00:00	27.862	1377.8	27.272	3272.2	27.37	807.3	NA	1065.6	28.258	3444.5	27.567	1722.2
24	2017-08-26 11:00:00	28.06	462.9	27.567	871.9	27.764	559.7	NA	807.3	28.159	1141	27.862	667.4
25	2017-08-26 12:00:00	28.357	1722.2	28.06	2755.6	28.456	2583.4	NA	3272.2	28.655	6200	28.456	3616.7
26	2017-08-26 13:00:00	28.357	3444.5	28.456	3100	28.655	4822.3	NA	6200	28.655	6544.5	28.655	3788.9
27	2017-08-26 14:00:00	28.06	2927.8	28.258	3444.5	28.456	3272.2	NA	6544.5	28.357	6200	28.456	3100
28	2017-08-26 15:00:00	27.862	430.6	27.862	430.6	27.961	355.2	NA	710.4	28.06	376.7	28.159	301.4
29	2017-08-26 16:00:00	27.862	473.6	27.862	409	27.961	376.7	NA	828.8	27.961	376.7	28.06	236.8
30	2017-08-26 17:00:00	27.862	333.7	27.764	269.1	27.961	279.9	NA	850.4	27.862	269.1	27.961	183
31	2017-08-26 18:00:00	27.764	118.4	27.665	107.6	27.862	86.1	NA	193.8	27.764	107.6	27.862	96.9
32	2017-08-26 19:00:00	27.665	0	27.468	0	27.764	0	NA	0	27.665	0	27.764	0
33	2017-08-26 20:00:00	27.567	0	27.37	0	27.665	0	NA	0	27.567	0	27.665	0
34	2017-08-26 21:00:00	27.468	0	27.173	0	27.567	0	NA	0	27.468	0	27.567	0
35	2017-08-26 22:00:00	27.37	0	27.075	0	27.468	0	NA	0	27.37	0	27.468	0
36	2017-08-26 23:00:00	27.272	0	26.977	0	27.37	0	NA	0	27.272	0	27.37	0
37	2017-08-27	27.173	0	26.977	0	27.37	0	NA	0	27.272	0	27.272	0
38	2017-08-27 01:00:00	27.173	0	26.977	0	27.272	0	NA	0	27.272	0	27.272	0
39	2017-08-27 02:00:00	27.272	0	26.977	0	27.37	0	NA	0	27.272	0	27.272	0
40	2017-08-27 03:00:00	27.272	0	26.977	0	27.37	0	NA	0	27.272	0	27.272	0
41	2017-08-27 04:00:00	27.173	0	26.977	0	27.272	0	NA	0	27.173	0	27.173	0
42	2017-08-27 05:00:00	27.173	0	26.977	0	27.272	0	NA	0	27.173	0	27.173	0
43	2017-08-27 06:00:00	27.075	0	26.879	0	27.173	0	NA	0	27.075	0	27.075	0
44	2017-08-27 07:00:00	27.173	1184	26.977	688.9	27.075	290.6	NA	193.8	27.075	355.2	27.075	139.9
45	2017-08-27 08:00:00	27.567	2497.2	26.977	775	27.173	581.3	NA	549	27.272	828.8	27.075	409
46	2017-08-27 09:00:00	27.37	1302.4	27.075	1463.9	27.173	549	NA	409	27.764	3272.2	27.075	592
47	2017-08-27 10:00:00	27.764	2152.8	27.272	3272.2	27.272	958	NA	1377.8	28.06	3788.9	27.567	2066.7
48	2017-08-27 11:00:00	27.961	2238.9	27.665	2755.6	27.764	1463.9	NA	2325	28.357	4650	27.764	2669.5
49	2017-08-27 12:00:00	28.258	2497.2	28.159	2755.6	28.357	2583.4	NA	4133.4	28.555	3961.1	28.357	2497.2
50	2017-08-27 13:00:00	28.258	2497.2	28.357	2583.4	28.456	2755.6	NA	4822.3	28.456	3444.5	28.456	2755.6
51	2017-08-27 14:00:00	28.555	1980.6	28.754	1636.1	28.655	1377.8	NA	3444.5	28.754	1980.6	28.754	1313.2
52	2017-08-27 15:00:00	28.555	1980.6	28.655	1367	28.853	2325	NA	8266.7	28.655	828.8	28.754	828.8
53	2017-08-27 16:00:00	28.357	667.4	28.456	731.9	28.357	925.7	NA	1130.2	28.357	538.2	28.456	419.8
54	2017-08-27 17:00:00	28.159	301.4	28.258	269.1	28.159	269.1	NA	516.7	28.159	269.1	28.258	172.2
55	2017-08-27 18:00:00	28.06	193.8	28.06	215.3	28.06	193.8	NA	505.9	28.06	172.2	28.159	139.9
56	2017-08-27 19:00:00	27.961	0	27.862	0	28.06	0	NA	0	27.961	0	28.06	0
57	2017-08-27 20:00:00	27.961	0	27.764	0	28.06	0	NA	0	27.961	0	27.961	0
58	2017-08-27 21:00:00	27.961	0	27.764	0	27.961	0	NA	0	27.961	0	27.961	0
59	2017-08-27 22:00:00	27.862	0	27.665	0	27.961	0	NA	0	27.862	0	27.862	0
60	2017-08-27 23:00:00	27.764	0	27.567	0	27.862	0	NA	0	27.764	0	27.862	0
61	2017-08-28	27.764	0	27.567	0	27.764	0	NA	0	27.764	0	27.764	0
62	2017-08-28 01:00:00	27.665	0	27.567	0	27.764	0	NA	0	27.665	0	27.764	0
63	2017-08-28 02:00:00	27.665	0	27.567	0	27.665	0	NA	0	27.665	0	27.665	0
64	2017-08-28 03:00:00	27.665	0	27.468	0	27.567	0	NA	0	27.567	0	27.567	0
65	2017-08-28 04:00:00	27.567	0	27.468	0	27.567	0	NA	0	27.567	0	27.567	0
66	2017-08-28 05:00:00	27.665	0	27.468	0	27.567	0	NA	0	27.567	0	27.567	0
67	2017-08-28 06:00:00	27.665	0	27.567	0	27.665	0	NA	0	27.567	0	27.567	0
68	2017-08-28 07:00:00	27.764	1377.8	27.665	613.5	27.665	333.7	NA	236.8	27.665	344.4	27.665	183
69	2017-08-28 08:00:00	28.06	2927.8	27.665	1076.4	27.665	570.5	NA	484.4	27.764	861.1	27.665	409
70	2017-08-28 09:00:00	27.961	1463.9	27.764	1184	27.665	721.2	NA	925.7	27.961	1259.4	27.665	624.3
71	2017-08-28 10:00:00	28.357	1302.4	27.961	1205.6	27.862	549	NA	753.5	28.555	1141	28.159	613.5
72	2017-08-28 11:00:00	28.754	2669.5	28.357	3100	28.357	1808.3	NA	2927.8	28.953	4477.8	28.456	3100
73	2017-08-28 12:00:00	28.853	2755.6	28.754	3444.5	28.754	2669.5	NA	4994.5	28.953	3961.1	28.754	3100
74	2017-08-28 13:00:00	28.456	1194.8	28.555	1463.9	28.456	1108.7	NA	1894.5	28.555	1227.1	28.555	1022.6
75	2017-08-28 14:00:00	28.357	742.7	28.456	904.2	28.258	710.4	NA	1194.8	28.456	742.7	28.456	527.4
76	2017-08-28 15:00:00	28.258	355.2	28.258	495.1	28.258	312.2	NA	322.9	28.357	322.9	28.357	322.9
77	2017-08-28 16:00:00	28.159	312.2	28.159	376.7	28.06	290.6	NA	602.8	28.159	279.9	28.159	344.4
78	2017-08-28 17:00:00	28.06	75.3	28.06	107.6	28.06	107.6	NA	64.6	28.159	96.9	28.159	86.1
79	2017-08-28 18:00:00	28.159	21.5	28.06	43.1	28.06	32.3	NA	21.5	28.159	32.3	28.159	21.5
80	2017-08-28 19:00:00	28.06	0	27.961	0	27.862	0	NA	0	28.06	0	27.961	0
81	2017-08-28 20:00:00	27.862	0	27.862	0	27.764	0	NA	0	27.961	0	27.862	0
82	2017-08-28 21:00:00	27.862	0	27.764	0	27.665	0	NA	0	27.862	0	27.862	0
83	2017-08-28 22:00:00	27.961	0	27.764	0	27.764	0	NA	0	27.862	0	27.862	0
84	2017-08-28 23:00:00	27.961	0	27.764	0	27.764	0	NA	0	27.961	0	27.862	0
85	2017-08-29	27.764	0	27.665	0	27.665	0	NA	0	27.764	0	27.764	0
86	2017-08-29 01:00:00	27.862	0	27.665	0	27.665	0	NA	0	27.764	0	27.764	0
87	2017-08-29 02:00:00	27.764	0	27.567	0	27.665	0	NA	0	27.764	0	27.764	0
88	2017-08-29 03:00:00	27.567	0	27.468	0	27.567	0	NA	0	27.665	0	27.665	0
89	2017-08-29 04:00:00	27.567	0	27.468	0	27.567	0	NA	0	27.665	0	27.665	0
90	2017-08-29 05:00:00	27.665	0	27.468	0	27.468	0	NA	0	27.567	0	27.665	0
91	2017-08-29 06:00:00	27.665	0	27.468	0	27.468	0	NA	0	27.567	0	27.567	0
92	2017-08-29 07:00:00	27.567	183	27.468	129.2	27.468	75.3	NA	75.3	27.567	129.2	27.567	86.1
93	2017-08-29 08:00:00	27.764	462.9	27.567	430.6	27.567	1173.3	NA	290.6	27.665	462.9	27.665	290.6
94	2017-08-29 09:00:00	27.862	861.1	27.665	785.8	27.764	495.1	NA	505.9	27.862	850.4	27.862	559.7
95	2017-08-29 10:00:00	28.06	344.4	27.862	592	27.862	419.8	NA	473.6	28.06	592	28.06	344.4
96	2017-08-29 11:00:00	28.159	602.8	28.06	710.4	27.961	495.1	NA	409	28.159	710.4	28.159	495.1
97	2017-08-29 12:00:00	28.159	882.6	28.159	936.5	28.06	1001	NA	667.4	28.159	925.7	28.258	516.7
98	2017-08-29 13:00:00	28.258	850.4	28.159	925.7	28.06	1345.5	NA	592	28.159	936.5	28.258	516.7
99	2017-08-29 14:00:00	28.357	968.8	28.258	1216.3	28.258	1377.8	NA	807.3	28.258	1205.6	28.258	495.1
100	2017-08-29 15:00:00	28.06	215.3	27.961	279.9	27.862	312.2	NA	161.5	27.961	226	27.961	118.4
101	2017-08-29 16:00:00	27.862	32.3	27.764	43.1	27.764	21.5	NA	10.8	27.862	21.5	27.764	32.3
102	2017-08-29 17:00:00	27.764	0	27.665	10.8	27.567	0	NA	0	27.665	0	27.665	10.8
103	2017-08-29 18:00:00	27.764	10.8	27.665	21.5	27.567	10.8	NA	0	27.665	10.8	27.665	21.5
104	2017-08-29 19:00:00	27.764	0	27.665	0	27.567	0	NA	0	27.764	0	27.665	0
105	2017-08-29 20:00:00	27.764	0	27.567	0	27.567	0	NA	0	27.665	0	27.665	0
106	2017-08-29 21:00:00	27.665	0	27.468	0	27.468	0	NA	0	27.665	0	27.567	0
107	2017-08-29 22:00:00	27.567	0	27.468	0	27.37	0	NA	0	27.567	0	27.468	0
108	2017-08-29 23:00:00	27.567	0	27.37	0	27.37	0	NA	0	27.567	0	27.468	0
109	2017-08-30	27.468	0	27.37	0	27.272	0	NA	0	27.468	0	27.37	0
110	2017-08-30 01:00:00	27.468	0	27.272	0	27.272	0	NA	0	27.468	0	27.37	0
111	2017-08-30 02:00:00	27.468	0	27.272	0	27.272	0	NA	0	27.468	0	27.37	0
112	2017-08-30 03:00:00	27.468	0	27.272	0	27.272	0	NA	0	27.468	0	27.37	0
113	2017-08-30 04:00:00	27.468	0	27.272	0	27.272	0	NA	0	27.468	0	27.37	0
114	2017-08-30 05:00:00	27.468	0	27.173	0	27.173	0	NA	0	27.37	0	27.37	0
115	2017-08-30 06:00:00	27.37	0	27.173	0	27.173	0	NA	0	27.37	0	27.272	0
116	2017-08-30 07:00:00	27.468	3100	27.272	398.3	27.173	376.7	NA	172.2	27.37	441.3	27.272	215.3
117	2017-08-30 08:00:00	27.665	6200	27.272	409	27.173	215.3	NA	204.5	27.468	699.7	27.272	139.9
118	2017-08-30 09:00:00	27.862	2927.8	27.468	581.3	27.173	312.2	NA	236.8	27.961	3444.5	27.37	430.6
119	2017-08-30 10:00:00	28.258	4477.8	27.862	1377.8	27.37	775	NA	549	28.357	2583.4	27.665	1894.5
120	2017-08-30 11:00:00	28.357	1324	28.06	1097.9	27.764	2497.2	NA	850.4	28.456	1722.2	27.961	1270.1
121	2017-08-30 12:00:00	28.456	1194.8	28.258	1280.9	28.06	958	NA	710.4	28.357	1184	28.159	893.4
122	2017-08-30 13:00:00	28.357	2669.5	28.357	2238.9	28.258	3788.9	NA	1463.9	28.357	2927.8	28.357	2497.2
123	2017-08-30 14:00:00	28.258	3100	28.258	3272.2	28.159	14466.8	NA	3100	28.258	5511.1	28.258	2497.2
124	2017-08-30 15:00:00	28.06	1313.2	28.159	1119.5	28.06	1980.6	NA	1119.5	28.159	1054.9	28.159	1722.2
125	2017-08-30 16:00:00	27.764	635.1	27.862	559.7	27.764	462.9	NA	538.2	27.862	527.4	27.862	279.9
126	2017-08-30 17:00:00	27.468	129.2	27.665	129.2	27.567	107.6	NA	86.1	27.764	118.4	27.665	53.8
127	2017-08-30 18:00:00	27.37	75.3	27.567	75.3	27.468	43.1	NA	32.3	27.665	53.8	27.567	21.5
128	2017-08-30 19:00:00	27.272	0	27.37	0	27.37	0	NA	0	27.665	0	27.468	0
129	2017-08-30 20:00:00	27.173	0	27.37	0	27.272	0	NA	0	27.567	0	27.468	0
130	2017-08-30 21:00:00	27.173	0	27.272	0	27.272	0	NA	0	27.567	0	27.468	0
131	2017-08-30 22:00:00	27.173	0	27.272	0	27.272	0	NA	0	27.567	0	27.468	0
132	2017-08-30 23:00:00	27.173	0	27.272	0	27.272	0	NA	0	27.567	0	27.468	0
133	2017-08-31	27.173	0	27.272	0	27.272	0	NA	0	27.468	0	27.468	0
134	2017-08-31 01:00:00	26.977	0	27.173	0	27.075	0	NA	0	27.37	0	27.272	0
135	2017-08-31 02:00:00	26.879	0	27.075	0	26.977	0	NA	0	27.272	0	27.173	0
136	2017-08-31 03:00:00	26.879	0	26.977	0	26.977	0	NA	0	27.272	0	27.173	0
137	2017-08-31 04:00:00	26.781	0	26.879	0	26.879	0	NA	0	27.173	0	27.075	0
138	2017-08-31 05:00:00	26.879	0	26.977	0	26.977	0	NA	0	27.272	0	27.173	0
139	2017-08-31 06:00:00	26.879	0	26.977	0	26.977	0	NA	0	27.272	0	27.173	0
140	2017-08-31 07:00:00	26.977	193.8	27.075	183	27.075	258.3	NA	96.9	27.37	139.9	27.272	183
141	2017-08-31 08:00:00	27.173	452.1	27.173	215.3	27.075	107.6	NA	96.9	27.37	301.4	27.272	387.5
142	2017-08-31 09:00:00	27.37	5511.1	27.272	602.8	27.075	409	NA	322.9	27.764	2755.6	27.272	850.4
143	2017-08-31 10:00:00	27.862	4822.3	27.665	1722.2	27.272	1130.2	NA	775	28.159	3100	27.665	5511.1
144	2017-08-31 11:00:00	28.06	2583.4	27.862	1463.9	27.665	7577.8	NA	1291.7	28.456	3272.2	27.862	4305.6
145	2017-08-31 12:00:00	28.456	3100	28.357	2411.1	28.357	4994.5	NA	1808.3	28.655	3788.9	28.555	6200
146	2017-08-31 13:00:00	28.655	2669.5	28.655	2497.2	28.655	5166.7	NA	1980.6	28.555	3444.5	28.754	7233.4
147	2017-08-31 14:00:00	28.754	1636.1	28.754	1808.3	28.754	3788.9	NA	958	28.655	1980.6	28.853	2755.6
148	2017-08-31 15:00:00	28.555	1216.3	28.555	613.5	28.754	7577.8	NA	1001	28.655	592	28.853	1033.3
149	2017-08-31 16:00:00	28.159	645.8	28.258	441.3	28.258	613.5	NA	484.4	28.258	538.2	28.555	409
150	2017-08-31 17:00:00	28.06	462.9	28.06	172.2	28.159	150.7	NA	172.2	28.159	247.6	28.258	312.2
151	2017-08-31 18:00:00	27.862	118.4	27.961	129.2	27.961	344.4	NA	75.3	28.159	86.1	28.159	96.9
152	2017-08-31 19:00:00	27.665	0	27.862	0	27.862	0	NA	0	28.159	0	28.06	0
153	2017-08-31 20:00:00	27.567	0	27.764	0	27.764	0	NA	0	28.06	0	27.961	0
154	2017-08-31 21:00:00	27.468	0	27.665	0	27.665	0	NA	0	28.06	0	27.862	0
155	2017-08-31 22:00:00	27.37	0	27.567	0	27.665	0	NA	0	28.06	0	27.862	0
156	2017-08-31 23:00:00	27.272	0	27.567	0	27.567	0	NA	0	27.961	0	27.764	0
157	2017-09-01	27.173	0	27.468	0	27.468	0	NA	0	27.961	0	27.665	0
158	2017-09-01 01:00:00	27.173	0	27.468	0	27.468	0	NA	0	27.862	0	27.665	0
159	2017-09-01 02:00:00	27.173	0	27.468	0	27.468	0	NA	0	27.862	0	27.665	0
160	2017-09-01 03:00:00	27.173	0	27.468	0	27.468	0	NA	0	27.862	0	27.665	0
161	2017-09-01 04:00:00	27.272	0	27.468	0	27.567	0	NA	0	27.862	0	27.665	0
162	2017-09-01 05:00:00	27.075	0	27.37	0	27.37	0	NA	0	27.665	0	27.567	0
163	2017-09-01 06:00:00	27.075	0	27.272	0	27.272	0	NA	0	27.665	0	27.468	0
164	2017-09-01 07:00:00	26.977	215.3	27.272	96.9	27.173	290.6	NA	53.8	27.665	96.9	27.37	172.2
165	2017-09-01 08:00:00	27.173	5511.1	27.37	419.8	27.272	624.3	NA	312.2	27.665	818.1	27.468	322.9
166	2017-09-01 09:00:00	27.272	484.4	27.37	118.4	27.272	355.2	NA	645.8	27.862	387.5	27.468	161.5
167	2017-09-01 10:00:00	27.961	3961.1	27.665	4133.4	28.258	581.3	NA	936.5	28.357	3272.2	27.764	1808.3
168	2017-09-01 11:00:00	28.159	1270.1	27.961	1463.9	28.159	925.7	NA	1377.8	28.258	1022.6	27.961	1722.2
169	2017-09-01 12:00:00	29.252	2238.9	28.456	2927.8	29.552	3272.2	NA	3272.2	28.456	5338.9	28.357	4822.3
170	2017-09-01 13:00:00	29.252	2325	29.053	3616.7	29.352	3444.5	NA	3272.2	28.754	3100	28.754	1894.5
171	2017-09-01 14:00:00	28.754	1463.9	28.853	1894.5	29.053	1463.9	NA	2583.4	28.754	2152.8	28.853	1087.2
172	2017-09-01 15:00:00	28.357	990.3	28.555	882.6	28.555	990.3	NA	1377.8	28.357	1216.3	28.555	409
173	2017-09-01 16:00:00	29.053	592	28.159	559.7	29.252	355.2	NA	505.9	28.06	376.7	28.258	1808.3
174	2017-09-01 17:00:00	29.752	462.9	28.06	301.4	30.054	226	NA	333.7	28.06	269.1	28.159	312.2
175	2017-09-01 18:00:00	29.252	118.4	27.961	118.4	29.352	64.6	NA	75.3	27.961	64.6	28.06	129.2
176	2017-09-01 19:00:00	29.552	0	27.961	0	30.054	0	NA	0	27.961	0	28.06	0
177	2017-09-01 20:00:00	29.452	0	27.961	0	29.652	0	NA	0	27.961	0	27.961	0
178	2017-09-01 21:00:00	29.252	0	27.764	0	29.752	0	NA	0	27.862	0	27.862	0
179	2017-09-01 22:00:00	29.752	0	27.764	0	30.255	0	NA	0	27.862	0	27.862	0
180	2017-09-01 23:00:00	30.154	0	27.862	0	30.659	0	NA	0	27.961	0	27.961	0
181	2017-09-02	30.154	0	27.764	0	30.659	0	NA	0	27.862	0	27.862	0
182	2017-09-02 01:00:00	30.255	0	27.764	0	30.76	0	NA	0	27.862	0	27.862	0
183	2017-09-02 02:00:00	30.356	0	27.665	0	30.862	0	NA	0	27.764	0	27.764	0
184	2017-09-02 03:00:00	30.356	0	27.665	0	30.76	0	NA	0	27.665	0	27.567	0
185	2017-09-02 04:00:00	30.356	0	27.567	0	30.76	0	NA	0	27.567	0	27.567	0
186	2017-09-02 05:00:00	30.356	0	27.567	0	30.659	0	NA	0	27.567	0	27.468	0
187	2017-09-02 06:00:00	30.356	0	27.468	0	30.659	0	NA	0	27.468	0	27.37	0
188	2017-09-02 07:00:00	30.356	581.3	27.468	107.6	30.558	53.8	NA	43.1	27.468	96.9	27.37	10.8
189	2017-09-02 08:00:00	30.457	2238.9	27.567	355.2	30.659	172.2	NA	236.8	27.567	516.7	27.468	86.1
190	2017-09-02 09:00:00	30.659	807.3	27.862	355.2	30.862	290.6	NA	419.8	28.06	721.2	27.764	1377.8
191	2017-09-02 10:00:00	30.963	527.4	27.961	312.2	30.76	236.8	NA	344.4	28.258	581.3	27.961	107.6
192	2017-09-02 11:00:00	30.659	678.1	27.961	441.3	30.659	398.3	NA	549	28.159	721.2	28.06	2497.2
193	2017-09-02 12:00:00	30.76	688.9	28.06	549	30.76	419.8	NA	559.7	28.258	592	28.159	150.7
194	2017-09-02 13:00:00	30.963	2152.8	28.655	1894.5	31.268	1808.3	NA	2238.9	28.754	3272.2	29.152	861.1
195	2017-09-02 14:00:00	30.356	839.6	28.655	538.2	31.166	527.4	NA	785.8	28.655	839.6	28.754	204.5
196	2017-09-02 15:00:00	30.862	1194.8	28.754	753.5	31.268	871.9	NA	1377.8	28.555	914.9	28.754	269.1
197	2017-09-02 16:00:00	31.064	861.1	28.555	592	31.166	495.1	NA	731.9	28.456	807.3	28.655	172.2
198	2017-09-02 17:00:00	30.255	452.1	28.456	322.9	30.963	279.9	NA	333.7	28.357	398.3	28.456	1141
199	2017-09-02 18:00:00	30.154	183	28.258	129.2	30.862	118.4	NA	139.9	28.258	150.7	28.258	505.9
200	2017-09-02 19:00:00	30.255	0	28.159	0	30.558	0	NA	0	28.258	0	28.258	0
201	2017-09-02 20:00:00	30.255	0	28.06	0	30.356	0	NA	0	28.258	0	28.159	0
202	2017-09-02 21:00:00	30.154	0	27.961	0	30.255	0	NA	0	28.159	0	28.06	0
203	2017-09-02 22:00:00	29.953	0	27.862	0	29.953	0	NA	0	28.06	0	27.862	0
204	2017-09-02 23:00:00	30.054	0	27.862	0	29.953	0	NA	0	28.06	0	27.862	0
205	2017-09-03	29.953	0	27.764	0	29.853	0	NA	0	28.06	0	27.764	0
206	2017-09-03 01:00:00	30.356	0	27.862	0	29.853	0	NA	0	28.06	0	27.764	0
207	2017-09-03 02:00:00	30.862	0	27.961	0	30.054	0	NA	0	28.06	0	27.862	0
208	2017-09-03 03:00:00	30.154	0	27.961	0	30.054	0	NA	0	28.06	0	27.862	0
209	2017-09-03 04:00:00	30.356	0	27.862	0	29.953	0	NA	0	27.961	0	27.764	0
210	2017-09-03 05:00:00	30.862	0	27.862	0	29.953	0	NA	0	27.961	0	27.764	0
211	2017-09-03 06:00:00	30.154	0	27.764	0	29.953	0	NA	0	27.961	0	27.665	0
212	2017-09-03 07:00:00	30.457	344.4	27.862	139.9	29.953	75.3	NA	129.2	27.961	150.7	27.665	21.5
213	2017-09-03 08:00:00	30.963	2583.4	27.961	290.6	30.054	172.2	NA	312.2	28.159	699.7	27.862	86.1
214	2017-09-03 09:00:00	30.457	5511.1	28.258	731.9	30.255	419.8	NA	473.6	28.655	2755.6	28.06	236.8
215	2017-09-03 10:00:00	30.255	624.3	28.456	355.2	30.255	226	NA	344.4	28.853	484.4	28.357	129.2
216	2017-09-03 11:00:00	30.558	2755.6	28.655	1550	30.457	1173.3	NA	1980.6	29.053	4133.4	28.953	1119.5
217	2017-09-03 12:00:00	30.862	2755.6	29.053	1894.5	30.76	2755.6	NA	2669.5	29.053	2583.4	29.252	1097.9
218	2017-09-03 13:00:00	30.457	2325	29.252	2066.7	30.963	2669.5	NA	18600.1	28.953	3616.7	29.652	1130.2
219	2017-09-03 14:00:00	30.76	1722.2	29.252	1980.6	31.268	6544.5	NA	39955.8	28.953	2755.6	29.352	1550
220	2017-09-03 15:00:00	30.659	1463.9	28.853	1011.8	31.064	1237.9	NA	13777.9	28.555	1108.7	28.953	473.6
221	2017-09-03 16:00:00	30.154	688.9	28.357	505.9	30.76	398.3	NA	3444.5	28.357	516.7	28.555	129.2
222	2017-09-03 17:00:00	30.356	107.6	28.159	86.1	30.457	64.6	NA	721.2	28.258	96.9	28.258	21.5
223	2017-09-03 18:00:00	30.356	64.6	28.06	43.1	30.154	32.3	NA	258.3	28.258	43.1	27.961	10.8
224	2017-09-03 19:00:00	30.558	0	28.06	0	30.154	0	NA	0	28.357	0	28.06	0
225	2017-09-03 20:00:00	30.963	0	28.258	0	30.356	0	NA	0	28.555	0	28.258	0
226	2017-09-03 21:00:00	30.255	0	28.258	0	30.558	0	NA	0	28.357	0	28.258	0
227	2017-09-03 22:00:00	30.356	0	28.258	0	30.659	0	NA	0	28.357	0	28.159	0
228	2017-09-03 23:00:00	30.862	0	28.258	0	30.558	0	NA	0	28.357	0	28.159	0
229	2017-09-04	30.054	0	28.159	0	30.558	0	NA	0	28.258	0	28.06	0
230	2017-09-04 01:00:00	30.558	0	28.159	0	30.457	0	NA	0	28.258	0	28.06	0
231	2017-09-04 02:00:00	30.659	0	28.06	0	30.457	0	NA	0	28.159	0	27.961	0
232	2017-09-04 03:00:00	30.054	0	28.06	0	30.457	0	NA	0	28.159	0	27.961	0
233	2017-09-04 04:00:00	30.76	0	28.06	0	30.457	0	NA	0	28.159	0	27.961	0
234	2017-09-04 05:00:00	30.457	0	28.06	0	30.457	0	NA	0	28.159	0	27.961	0
235	2017-09-04 06:00:00	30.255	0	28.06	0	30.457	0	NA	0	28.159	0	27.961	0
236	2017-09-04 07:00:00	31.064	3961.1	28.159	419.8	30.457	139.9	NA	861.1	28.159	366	27.961	53.8
237	2017-09-04 08:00:00	30.356	538.2	28.258	290.6	30.558	215.3	NA	1894.5	28.258	322.9	28.06	118.4
238	2017-09-04 09:00:00	30.054	5511.1	28.357	624.3	30.659	269.1	NA	1636.1	28.754	2755.6	28.159	258.3
239	2017-09-04 10:00:00	30.356	2152.8	28.555	904.2	30.255	398.3	NA	4650	29.152	2669.5	28.456	635.1
240	2017-09-04 11:00:00	30.154	1463.9	28.754	968.8	30.154	979.5	NA	9300.1	28.953	1205.6	28.555	581.3
241	2017-09-04 12:00:00	29.552	1463.9	28.555	1108.7	29.953	861.1	NA	2927.8	28.655	1377.8	28.555	893.4
242	2017-09-04 13:00:00	28.953	1377.8	29.053	1463.9	29.452	1550	NA	3961.1	28.853	3100	28.953	1097.9
243	2017-09-04 14:00:00	29.252	2066.7	29.252	2411.1	29.652	3444.5	NA	5511.1	29.152	3100	29.252	1076.4
244	2017-09-04 15:00:00	29.953	2669.5	29.053	1377.8	30.356	1894.5	NA	344.4	29.053	1463.9	29.053	398.3
245	2017-09-04 16:00:00	29.053	495.1	28.456	322.9	29.452	279.9	NA	236.8	28.555	376.7	28.655	118.4
246	2017-09-04 17:00:00	29.352	269.1	28.456	161.5	29.752	129.2	NA	21.5	28.456	301.4	28.555	53.8
247	2017-09-04 18:00:00	29.452	139.9	28.357	107.6	29.853	75.3	NA	0	28.357	139.9	28.456	21.5
248	2017-09-04 19:00:00	29.452	0	28.258	0	29.853	0	NA	0	28.258	0	28.357	0
249	2017-09-04 20:00:00	29.352	0	28.258	0	29.752	0	NA	0	28.159	0	28.258	0
250	2017-09-04 21:00:00	29.352	0	28.258	0	29.752	0	NA	0	28.159	0	28.258	0
251	2017-09-04 22:00:00	29.352	0	28.258	0	29.752	0	NA	0	28.159	0	28.258	0
252	2017-09-04 23:00:00	29.552	0	28.357	0	29.953	0	NA	0	28.258	0	28.357	0
253	2017-09-05	29.552	0	28.357	0	29.953	0	NA	0	28.258	0	28.357	0
254	2017-09-05 01:00:00	29.552	0	28.357	0	29.953	0	NA	0	28.258	0	28.357	0
255	2017-09-05 02:00:00	29.452	0	28.357	0	29.853	0	NA	0	28.159	0	28.258	0
256	2017-09-05 03:00:00	29.452	0	28.258	0	29.853	0	NA	0	28.159	0	28.159	0
257	2017-09-05 04:00:00	29.452	0	28.258	0	29.853	0	NA	0	28.159	0	28.159	0
258	2017-09-05 05:00:00	29.352	0	28.159	0	29.752	0	NA	0	28.06	0	28.06	0
259	2017-09-05 06:00:00	29.352	0	28.159	0	29.752	0	NA	0	28.06	0	28.06	0
260	2017-09-05 07:00:00	29.252	118.4	28.159	53.8	29.652	32.3	NA	10.8	27.961	43.1	28.06	53.8
261	2017-09-05 08:00:00	29.652	2325	28.258	409	29.853	150.7	NA	86.1	28.159	495.1	28.159	86.1
262	2017-09-05 08:45:37	NA	NA	NA	NA	NA	NA	NA	NA	NA	NA	NA	NA
263	2017-09-05 08:45:57	NA	NA	NA	NA	NA	NA	NA	NA	NA	NA	NA	NA
264	2017-09-05 08:46:04	NA	NA	NA	NA	NA	NA	NA	NA	NA	NA	NA	NA
265	2017-09-05 09:00:00	29.752	5511.1	28.357	624.3	29.752	204.5	NA	NA	28.853	1894.5	28.258	172.2
266	2017-09-05 10:00:00	30.054	2325	28.655	1216.3	29.853	366	NA	NA	29.652	2755.6	28.555	1636.1
267	2017-09-05 11:00:00	29.552	2927.8	28.953	1270.1	30.356	1087.2	NA	NA	29.953	2755.6	28.853	1980.6
268	2017-09-05 12:00:00	29.752	2669.5	29.552	2152.8	29.853	1636.1	NA	NA	30.054	3272.2	29.452	2497.2
269	2017-09-05 13:00:00	29.953	2583.4	29.752	2238.9	29.652	2669.5	NA	NA	29.953	3444.5	29.853	1636.1
270	2017-09-05 14:00:00	29.752	1194.8	29.452	871.9	29.552	785.8	NA	NA	29.752	871.9	29.752	2411.1
271	2017-09-05 15:00:00	29.352	613.5	29.152	742.7	30.154	656.6	NA	NA	29.252	699.7	29.252	247.6
272	2017-09-05 16:00:00	29.053	333.7	28.853	430.6	30.154	366	NA	NA	28.953	430.6	28.953	204.5
273	2017-09-05 17:00:00	29.953	204.5	28.655	269.1	30.054	204.5	NA	NA	28.754	269.1	28.754	86.1
274	2017-09-05 18:00:00	29.252	32.3	28.555	43.1	30.054	21.5	NA	NA	28.555	32.3	28.555	0
275	2017-09-05 19:00:00	29.452	0	28.555	0	30.054	0	NA	NA	28.555	0	28.456	0
276	2017-09-05 20:00:00	29.552	0	28.555	0	30.054	0	NA	NA	28.456	0	28.357	0
277	2017-09-05 21:00:00	29.053	0	28.555	0	30.054	0	NA	NA	28.456	0	28.357	0
278	2017-09-05 22:00:00	29.953	0	28.655	0	30.154	0	NA	NA	28.555	0	28.456	0
279	2017-09-05 23:00:00	29.152	0	28.555	0	30.054	0	NA	NA	28.555	0	28.456	0
280	2017-09-06	29.652	0	28.456	0	29.953	0	NA	NA	28.456	0	28.357	0
281	2017-09-06 01:00:00	29.452	0	28.456	0	29.853	0	NA	NA	28.357	0	28.357	0
282	2017-09-06 02:00:00	29.452	0	28.357	0	29.853	0	NA	NA	28.258	0	28.258	0
283	2017-09-06 03:00:00	29.752	0	28.159	0	29.752	0	NA	NA	28.159	0	28.159	0
284	2017-09-06 04:00:00	29.552	0	28.258	0	29.752	0	NA	NA	28.159	0	28.159	0
285	2017-09-06 05:00:00	29.252	0	28.258	0	29.752	0	NA	NA	28.159	0	28.06	0
286	2017-09-06 06:00:00	29.853	0	28.159	0	29.652	0	NA	NA	28.06	0	28.06	0
287	2017-09-06 07:00:00	29.352	635.1	28.258	549	29.652	96.9	NA	NA	28.06	322.9	27.961	53.8
288	2017-09-06 08:00:00	29.552	538.2	28.258	430.6	29.652	139.9	NA	NA	28.159	549	28.06	53.8
289	2017-09-06 09:00:00	29.552	236.8	28.357	183	29.752	96.9	NA	NA	28.655	419.8	28.159	258.3
290	2017-09-06 10:00:00	29.352	613.5	28.357	495.1	30.054	484.4	NA	NA	28.555	1894.5	28.357	505.9
291	2017-09-06 11:00:00	29.953	1722.2	28.655	2152.8	29.953	441.3	NA	NA	28.853	6544.5	28.655	18600.1
292	2017-09-06 12:00:00	29.652	2927.8	29.152	3100	29.452	2755.6	NA	NA	29.352	6200	29.252	46844.8
293	2017-09-06 13:00:00	29.552	3272.2	29.652	3788.9	30.457	3961.1	NA	NA	30.054	3444.5	29.652	26178
294	2017-09-06 14:00:00	29.352	505.9	29.552	656.6	29.853	495.1	NA	NA	29.652	398.3	29.352	2238.9
295	2017-09-06 15:00:00	29.552	2066.7	29.452	2411.1	29.752	2411.1	NA	NA	29.552	624.3	29.152	4477.8
296	2017-09-06 16:00:00	29.252	419.8	29.053	409	29.552	484.4	NA	NA	29.252	430.6	29.053	2152.8
297	2017-09-06 17:00:00	29.552	193.8	28.853	215.3	30.054	290.6	NA	NA	28.953	215.3	28.953	731.9
298	2017-09-06 18:00:00	29.552	75.3	28.655	75.3	29.352	86.1	NA	NA	28.754	64.6	28.853	366
299	2017-09-06 19:00:00	30.054	0	28.655	0	30.356	0	NA	NA	28.555	0	28.754	0
300	2017-09-06 20:00:00	30.356	0	28.456	0	30.862	0	NA	NA	28.456	0	28.655	0
301	2017-09-06 21:00:00	30.457	0	28.357	0	31.064	0	NA	NA	28.258	0	28.555	0
302	2017-09-06 22:00:00	30.558	0	28.357	0	31.166	0	NA	NA	28.258	0	28.555	0
303	2017-09-06 23:00:00	30.457	0	28.258	0	31.166	0	NA	NA	28.159	0	28.456	0
304	2017-09-07	30.457	0	28.258	0	31.166	0	NA	NA	28.159	0	28.456	0
305	2017-09-07 01:00:00	30.356	0	28.159	0	31.166	0	NA	NA	28.06	0	28.456	0
306	2017-09-07 02:00:00	30.356	0	28.159	0	31.166	0	NA	NA	28.06	0	28.357	0
307	2017-09-07 03:00:00	30.356	0	28.159	0	31.064	0	NA	NA	28.06	0	28.357	0
308	2017-09-07 04:00:00	30.356	0	28.159	0	31.064	0	NA	NA	28.06	0	28.357	0
309	2017-09-07 05:00:00	30.255	0	28.159	0	31.064	0	NA	NA	27.961	0	28.258	0
310	2017-09-07 06:00:00	30.255	0	28.06	0	31.064	0	NA	NA	27.961	0	28.357	0
311	2017-09-07 07:00:00	30.457	656.6	28.159	398.3	31.064	183	NA	NA	28.06	376.7	28.357	462.9
312	2017-09-07 08:00:00	30.659	1463.9	28.258	721.2	30.963	667.4	NA	NA	28.258	1054.9	28.357	2238.9
313	2017-09-07 09:00:00	30.76	828.8	28.258	742.7	31.064	667.4	NA	NA	28.655	936.5	28.456	3616.7
314	2017-09-07 10:00:00	30.356	2497.2	28.555	1894.5	30.76	1054.9	NA	NA	29.352	2497.2	28.754	9644.5
315	2017-09-07 11:00:00	29.652	1162.5	28.754	721.2	29.652	775	NA	NA	28.953	1065.6	28.655	2669.5
316	2017-09-07 12:00:00	29.452	3100	29.152	2755.6	30.255	2927.8	NA	NA	29.252	4822.3	29.252	23422.4
317	2017-09-07 13:00:00	29.352	2927.8	29.452	2669.5	30.255	3788.9	NA	NA	29.853	2238.9	29.552	33066.9
318	2017-09-07 14:00:00	29.853	1463.9	29.053	1463.9	29.752	1636.1	NA	NA	29.053	871.9	29.053	1894.5
319	2017-09-07 15:00:00	29.352	1184	28.754	979.5	30.054	1011.8	NA	NA	28.853	452.1	28.853	462.9
320	2017-09-07 16:00:00	29.452	753.5	28.555	559.7	29.953	635.1	NA	NA	28.655	430.6	28.655	592
321	2017-09-07 17:00:00	29.552	473.6	28.357	366	29.652	376.7	NA	NA	28.456	150.7	28.456	279.9
322	2017-09-07 18:00:00	29.452	118.4	28.258	86.1	29.953	96.9	NA	NA	28.258	64.6	28.357	21.5
323	2017-09-07 19:00:00	29.452	0	28.159	0	30.054	0	NA	NA	28.258	0	28.258	0
324	2017-09-07 20:00:00	29.352	0	28.06	0	30.054	0	NA	NA	28.258	0	28.258	0
325	2017-09-07 21:00:00	29.352	0	28.06	0	29.953	0	NA	NA	28.159	0	28.159	0
326	2017-09-07 22:00:00	29.252	0	27.961	0	29.853	0	NA	NA	28.06	0	28.06	0
327	2017-09-07 23:00:00	29.252	0	27.961	0	29.853	0	NA	NA	28.06	0	28.06	0
328	2017-09-08	29.152	0	27.862	0	29.853	0	NA	NA	28.06	0	27.961	0
329	2017-09-08 01:00:00	29.152	0	27.862	0	29.853	0	NA	NA	27.961	0	27.961	0
330	2017-09-08 02:00:00	29.152	0	27.862	0	29.853	0	NA	NA	27.961	0	27.961	0
331	2017-09-08 03:00:00	29.252	0	27.862	0	29.853	0	NA	NA	27.961	0	27.961	0
332	2017-09-08 04:00:00	29.352	0	27.961	0	30.054	0	NA	NA	28.06	0	28.06	0
333	2017-09-08 05:00:00	29.252	0	27.862	0	30.054	0	NA	NA	27.961	0	28.06	0
334	2017-09-08 06:00:00	29.152	0	27.764	0	29.853	0	NA	NA	27.862	0	27.862	0
335	2017-09-08 07:00:00	29.152	409	27.764	129.2	29.853	139.9	NA	NA	27.862	96.9	27.862	312.2
336	2017-09-08 08:00:00	29.452	6544.5	27.862	419.8	29.752	376.7	NA	NA	27.961	430.6	27.862	721.2
337	2017-09-08 09:00:00	29.552	1980.6	28.06	624.3	29.853	635.1	NA	NA	28.357	678.1	27.961	1808.3
338	2017-09-08 10:00:00	29.752	2583.4	28.258	1356.3	29.953	656.6	NA	NA	29.053	1980.6	28.357	4822.3
339	2017-09-08 11:00:00	29.352	3788.9	28.655	2325	30.255	1550	NA	NA	29.252	2927.8	28.655	8266.7
340	2017-09-08 12:00:00	29.853	3100	29.053	2755.6	29.752	2927.8	NA	NA	29.252	2152.8	28.953	9644.5
341	2017-09-08 13:00:00	30.154	2927.8	29.152	3272.2	30.154	3616.7	NA	NA	29.152	2755.6	29.053	7233.4
342	2017-09-08 14:00:00	29.953	581.3	29.053	549	29.552	699.7	NA	NA	29.053	236.8	29.053	1980.6
343	2017-09-08 15:00:00	29.152	1356.3	28.853	1087.2	30.356	1205.6	NA	NA	28.953	667.4	28.754	2411.1
344	2017-09-08 16:00:00	29.652	914.9	28.555	699.7	29.452	753.5	NA	NA	28.655	409	28.555	2411.1
345	2017-09-08 17:00:00	29.853	538.2	28.456	409	30.054	430.6	NA	NA	28.456	269.1	28.555	1097.9
346	2017-09-08 18:00:00	29.853	193.8	28.258	139.9	29.452	139.9	NA	NA	28.357	64.6	28.357	279.9
347	2017-09-08 19:00:00	29.752	0	28.159	0	29.853	0	NA	NA	28.258	0	28.258	0
348	2017-09-08 20:00:00	29.752	0	28.159	0	30.054	0	NA	NA	28.258	0	28.258	0
349	2017-09-08 21:00:00	29.652	0	28.06	0	30.154	0	NA	NA	28.258	0	28.159	0
350	2017-09-08 22:00:00	29.752	0	28.06	0	30.054	0	NA	NA	28.258	0	28.159	0
351	2017-09-08 23:00:00	29.652	0	28.06	0	30.054	0	NA	NA	28.258	0	28.159	0
352	2017-09-09	29.652	0	27.961	0	30.054	0	NA	NA	28.159	0	28.06	0
353	2017-09-09 01:00:00	29.652	0	27.961	0	30.054	0	NA	NA	28.159	0	28.06	0
354	2017-09-09 02:00:00	29.452	0	27.961	0	29.953	0	NA	NA	28.159	0	28.06	0
355	2017-09-09 03:00:00	29.552	0	27.961	0	29.853	0	NA	NA	28.159	0	28.06	0
356	2017-09-09 04:00:00	29.452	0	27.862	0	29.853	0	NA	NA	28.06	0	28.06	0
357	2017-09-09 05:00:00	29.452	0	27.862	0	29.853	0	NA	NA	28.06	0	27.961	0
358	2017-09-09 06:00:00	29.452	0	27.862	0	29.853	0	NA	NA	27.961	0	27.961	0
359	2017-09-09 07:00:00	29.352	452.1	27.862	193.8	29.953	183	NA	NA	27.961	107.6	27.961	559.7
360	2017-09-09 08:00:00	29.452	581.3	27.862	409	30.054	355.2	NA	NA	28.06	247.6	27.961	1001
361	2017-09-09 09:00:00	29.652	1237.9	27.961	839.6	29.953	753.5	NA	NA	28.258	398.3	27.961	2583.4
362	2017-09-09 10:00:00	29.752	2238.9	28.159	1550	30.054	1108.7	NA	NA	28.655	1313.2	28.258	5166.7
363	2017-09-09 11:00:00	29.752	2755.6	28.555	1808.3	30.356	1280.9	NA	NA	29.053	2411.1	28.555	15155.7
364	2017-09-09 12:00:00	29.152	2066.7	28.754	1808.3	29.552	1894.5	NA	NA	28.853	1377.8	28.853	8611.2
365	2017-09-09 13:00:00	29.953	1808.3	29.053	2238.9	30.457	3272.2	NA	NA	28.953	2152.8	29.053	18600.1
366	2017-09-09 14:00:00	29.452	2152.8	29.152	3100	29.953	3272.2	NA	NA	28.953	1636.1	29.053	7233.4
367	2017-09-09 15:00:00	29.352	1636.1	28.754	1334.7	29.853	1291.7	NA	NA	28.754	613.5	28.655	2411.1
368	2017-09-09 16:00:00	29.652	807.3	28.357	462.9	30.054	807.3	NA	NA	28.357	193.8	28.357	1894.5
369	2017-09-09 17:00:00	29.953	678.1	28.258	204.5	29.652	312.2	NA	NA	28.357	118.4	28.357	419.8
370	2017-09-09 18:00:00	29.352	64.6	28.357	32.3	30.054	32.3	NA	NA	28.456	10.8	28.456	107.6
371	2017-09-09 19:00:00	29.652	0	28.258	0	30.457	0	NA	NA	28.357	0	28.456	0
372	2017-09-09 20:00:00	29.853	0	28.258	0	30.862	0	NA	NA	28.357	0	28.357	0
373	2017-09-09 21:00:00	29.953	0	28.258	0	31.166	0	NA	NA	28.357	0	28.357	0
374	2017-09-09 22:00:00	30.054	0	28.258	0	30.76	0	NA	NA	28.357	0	28.357	0
375	2017-09-09 23:00:00	30.054	0	28.258	0	30.457	0	NA	NA	28.357	0	28.357	0
376	2017-09-10	30.054	0	28.159	0	30.659	0	NA	NA	28.258	0	28.357	0
377	2017-09-10 01:00:00	29.953	0	28.159	0	30.76	0	NA	NA	28.258	0	28.258	0
378	2017-09-10 02:00:00	29.953	0	28.159	0	30.862	0	NA	NA	28.258	0	28.258	0
379	2017-09-10 03:00:00	30.054	0	28.159	0	30.862	0	NA	NA	28.258	0	28.258	0
380	2017-09-10 04:00:00	30.054	0	28.06	0	30.862	0	NA	NA	28.159	0	28.258	0
381	2017-09-10 05:00:00	29.953	0	28.06	0	30.76	0	NA	NA	28.159	0	28.159	0
382	2017-09-10 06:00:00	29.953	0	28.06	0	30.862	0	NA	NA	28.159	0	28.159	0
383	2017-09-10 07:00:00	30.054	366	28.06	139.9	30.862	129.2	NA	NA	28.159	204.5	28.159	344.4
384	2017-09-10 08:00:00	30.255	387.5	28.159	236.8	30.862	150.7	NA	NA	28.258	139.9	28.159	279.9
385	2017-09-10 09:00:00	30.558	6200	28.258	699.7	30.76	452.1	NA	NA	28.754	1550	28.159	1011.8
386	2017-09-10 10:00:00	30.76	2497.2	28.555	1722.2	30.76	742.7	NA	NA	28.853	2325	28.456	3100
387	2017-09-10 11:00:00	30.356	3100	29.053	2755.6	31.166	1345.5	NA	NA	29.352	2583.4	28.853	15844.5
388	2017-09-10 12:00:00	30.255	3788.9	29.452	3788.9	31.166	2927.8	NA	NA	29.152	1173.3	29.352	11022.3
389	2017-09-10 13:00:00	30.659	1636.1	29.552	3616.7	30.659	2927.8	NA	NA	29.252	2669.5	29.552	39955.8
390	2017-09-10 14:00:00	31.064	2669.5	29.552	3961.1	30.558	3272.2	NA	NA	29.252	1377.8	29.352	6544.5
391	2017-09-10 15:00:00	30.255	2238.9	29.053	2583.4	31.166	1808.3	NA	NA	29.053	645.8	28.953	3444.5
392	2017-09-10 16:00:00	30.558	322.9	28.853	366	30.558	247.6	NA	NA	28.853	118.4	28.853	807.3
393	2017-09-10 17:00:00	30.76	215.3	28.655	204.5	30.862	150.7	NA	NA	28.754	75.3	28.754	624.3
394	2017-09-10 18:00:00	30.963	10.8	28.655	21.5	30.963	0	NA	NA	28.754	0	28.754	53.8
395	2017-09-10 19:00:00	29.953	0	28.655	0	30.255	0	NA	NA	28.555	0	28.555	0
396	2017-09-10 20:00:00	30.659	0	28.456	0	31.268	0	NA	NA	28.357	0	28.357	0
397	2017-09-10 21:00:00	30.76	0	28.357	0	30.457	0	NA	NA	28.357	0	28.357	0
398	2017-09-10 22:00:00	30.054	0	28.456	0	31.166	0	NA	NA	28.456	0	28.456	0
399	2017-09-10 23:00:00	30.963	0	28.456	0	30.76	0	NA	NA	28.456	0	28.456	0
400	2017-09-11	30.255	0	28.456	0	30.659	0	NA	NA	28.456	0	28.456	0
401	2017-09-11 01:00:00	30.558	0	28.456	0	30.963	0	NA	NA	28.357	0	28.357	0
402	2017-09-11 02:00:00	30.659	0	28.357	0	30.255	0	NA	NA	28.357	0	28.357	0
403	2017-09-11 03:00:00	30.054	0	28.357	0	31.268	0	NA	NA	28.357	0	28.357	0
404	2017-09-11 04:00:00	30.963	0	28.258	0	30.457	0	NA	NA	28.258	0	28.258	0
405	2017-09-11 05:00:00	30.255	0	28.258	0	31.064	0	NA	NA	28.258	0	28.258	0
406	2017-09-11 06:00:00	30.558	0	28.159	0	30.76	0	NA	NA	28.159	0	28.159	0
407	2017-09-11 07:00:00	30.76	1377.8	28.258	161.5	30.659	86.1	NA	NA	28.159	86.1	28.159	172.2
408	2017-09-11 08:00:00	30.255	1636.1	28.258	430.6	31.064	333.7	NA	NA	28.258	538.2	28.258	527.4
409	2017-09-11 09:00:00	30.154	1463.9	28.456	430.6	30.558	366	NA	NA	28.754	559.7	28.357	1151.7
410	2017-09-11 10:00:00	30.558	2583.4	28.853	2066.7	30.457	796.5	NA	NA	29.352	2325	28.555	1722.2
411	2017-09-11 11:00:00	30.963	2066.7	28.953	1636.1	31.064	1044.1	NA	NA	29.252	1550	28.754	9300.1
412	2017-09-11 12:00:00	31.166	1194.8	28.853	1463.9	31.472	1377.8	NA	NA	28.953	721.2	28.853	3961.1
413	2017-09-11 13:00:00	31.166	613.5	28.754	366	31.676	430.6	NA	NA	28.754	226	28.853	1636.1
414	2017-09-11 14:00:00	30.76	419.8	28.456	247.6	31.268	236.8	NA	NA	28.555	204.5	28.555	796.5
415	2017-09-11 15:00:00	30.558	279.9	28.258	193.8	31.166	193.8	NA	NA	28.258	96.9	28.258	893.4
416	2017-09-11 16:00:00	30.356	193.8	28.159	139.9	31.268	139.9	NA	NA	28.06	75.3	28.159	559.7
417	2017-09-11 17:00:00	30.457	183	28.258	118.4	31.37	129.2	NA	NA	28.159	64.6	28.258	613.5
418	2017-09-11 18:00:00	30.659	43.1	28.357	21.5	31.778	21.5	NA	NA	28.258	0	28.357	193.8
419	2017-09-11 19:00:00	30.659	0	28.357	0	32.086	0	NA	NA	28.258	0	28.357	0
420	2017-09-11 20:00:00	30.76	0	28.357	0	31.472	0	NA	NA	28.357	0	28.357	0
421	2017-09-11 21:00:00	30.76	0	28.357	0	32.086	0	NA	NA	28.357	0	28.357	0
422	2017-09-11 22:00:00	30.862	0	28.357	0	31.472	0	NA	NA	28.357	0	28.357	0
423	2017-09-11 23:00:00	30.76	0	28.357	0	32.086	0	NA	NA	28.357	0	28.357	0
424	2017-09-12	30.76	0	28.357	0	31.472	0	NA	NA	28.357	0	28.258	0
425	2017-09-12 01:00:00	30.659	0	28.159	0	31.983	0	NA	NA	28.159	0	28.159	0
426	2017-09-12 02:00:00	30.558	0	28.159	0	31.574	0	NA	NA	28.159	0	28.06	0
427	2017-09-12 03:00:00	30.457	0	28.06	0	31.88	0	NA	NA	28.06	0	28.06	0
428	2017-09-12 04:00:00	30.356	0	27.961	0	31.676	0	NA	NA	27.961	0	27.961	0
429	2017-09-12 05:00:00	30.356	0	27.961	0	31.778	0	NA	NA	27.961	0	27.961	0
430	2017-09-12 06:00:00	30.255	0	27.862	0	31.676	0	NA	NA	27.862	0	27.764	0
431	2017-09-12 07:00:00	30.356	5511.1	27.961	344.4	31.778	215.3	NA	NA	28.06	473.6	27.862	193.8
432	2017-09-12 08:00:00	30.054	1463.9	28.258	419.8	31.676	301.4	NA	NA	28.258	355.2	28.159	462.9
433	2017-09-12 09:00:00	30.76	5166.7	28.456	538.2	31.574	376.7	NA	NA	29.053	1808.3	28.357	699.7
434	2017-09-12 10:00:00	31.268	871.9	28.655	731.9	31.983	505.9	NA	NA	28.853	527.4	28.555	893.4
435	2017-09-12 11:00:00	30.963	871.9	28.655	764.2	31.37	613.5	NA	NA	28.754	333.7	28.555	3100
436	2017-09-12 12:00:00	31.268	462.9	28.754	419.8	32.086	344.4	NA	NA	28.655	226	28.655	1345.5
437	2017-09-12 13:00:00	31.472	1636.1	29.152	2927.8	31.676	2755.6	NA	NA	29.152	2583.4	29.152	16533.4
438	2017-09-12 14:00:00	31.574	1463.9	29.053	1550	31.983	1119.5	NA	NA	29.053	1237.9	29.053	2755.6
439	2017-09-12 15:00:00	31.983	1808.3	29.252	1636.1	32.188	1636.1	NA	NA	29.152	1033.3	28.953	1550
440	2017-09-12 16:00:00	31.778	559.7	28.953	731.9	31.574	409	NA	NA	28.953	247.6	28.853	656.6
441	2017-09-12 17:00:00	31.676	473.6	28.853	592	32.086	366	NA	NA	28.754	258.3	28.754	656.6
442	2017-09-12 18:00:00	31.676	129.2	28.655	161.5	31.472	75.3	NA	NA	28.655	21.5	28.655	161.5
443	2017-09-12 19:00:00	31.574	0	28.655	0	31.983	0	NA	NA	28.655	0	28.655	0
444	2017-09-12 20:00:00	31.472	0	28.655	0	31.472	0	NA	NA	28.655	0	28.555	0
445	2017-09-12 21:00:00	31.472	0	28.555	0	32.086	0	NA	NA	28.555	0	28.555	0
446	2017-09-12 22:00:00	31.472	0	28.555	0	31.472	0	NA	NA	28.555	0	28.456	0
447	2017-09-12 23:00:00	31.472	0	28.456	0	31.983	0	NA	NA	28.456	0	28.456	0
448	2017-09-13	31.472	0	28.456	0	31.574	0	NA	NA	28.456	0	28.357	0
449	2017-09-13 01:00:00	31.37	0	28.357	0	31.983	0	NA	NA	28.357	0	28.357	0
450	2017-09-13 02:00:00	31.268	0	28.357	0	31.574	0	NA	NA	28.357	0	28.357	0
451	2017-09-13 03:00:00	31.268	0	28.258	0	32.086	0	NA	NA	28.258	0	28.258	0
452	2017-09-13 04:00:00	31.166	0	28.258	0	31.574	0	NA	NA	28.258	0	28.258	0
453	2017-09-13 05:00:00	31.166	0	28.159	0	31.983	0	NA	NA	28.159	0	28.159	0
454	2017-09-13 06:00:00	31.166	0	28.159	0	31.472	0	NA	NA	28.159	0	28.159	0
455	2017-09-13 07:00:00	31.064	2152.8	28.159	161.5	31.983	96.9	NA	NA	28.159	161.5	28.06	118.4
456	2017-09-13 08:00:00	31.268	1044.1	28.159	366	31.37	312.2	NA	NA	28.159	462.9	28.159	484.4
457	2017-09-13 09:00:00	31.574	4650	28.258	505.9	31.983	419.8	NA	NA	28.754	1377.8	28.159	764.2
458	2017-09-13 10:00:00	31.268	2411.1	28.555	1324	31.37	635.1	NA	NA	29.152	1980.6	28.357	1173.3
459	2017-09-13 11:00:00	31.268	2583.4	28.853	1636.1	31.778	947.2	NA	NA	29.252	2927.8	28.655	7233.4
460	2017-09-13 12:00:00	31.676	3100	29.152	2325	31.676	3100	NA	NA	28.853	1722.2	29.053	9644.5
461	2017-09-13 13:00:00	31.064	1722.2	29.452	2755.6	32.086	3272.2	NA	NA	29.352	3100	29.352	14466.8
462	2017-09-13 14:00:00	31.37	1119.5	29.152	1173.3	31.778	1119.5	NA	NA	29.053	613.5	29.053	2755.6
463	2017-09-13 15:00:00	31.37	796.5	28.853	645.8	31.88	699.7	NA	NA	28.853	430.6	28.853	1550
464	2017-09-13 16:00:00	31.676	527.4	28.853	775	31.778	581.3	NA	NA	28.953	269.1	28.853	139.9
465	2017-09-13 17:00:00	31.064	269.1	28.853	419.8	31.778	247.6	NA	NA	28.853	139.9	28.754	150.7
466	2017-09-13 18:00:00	31.472	53.8	28.754	86.1	31.983	32.3	NA	NA	28.754	10.8	28.655	0
467	2017-09-13 19:00:00	31.676	0	28.655	0	31.574	0	NA	NA	28.655	0	28.655	0
468	2017-09-13 20:00:00	31.166	0	28.655	0	31.983	0	NA	NA	28.555	0	28.555	0
469	2017-09-13 21:00:00	31.472	0	28.555	0	31.37	0	NA	NA	28.456	0	28.456	0
470	2017-09-13 22:00:00	31.574	0	28.456	0	31.983	0	NA	NA	28.456	0	28.357	0
471	2017-09-13 23:00:00	31.676	0	28.456	0	31.472	0	NA	NA	28.456	0	28.456	0
472	2017-09-14	31.676	0	28.456	0	31.983	0	NA	NA	28.456	0	28.456	0
473	2017-09-14 01:00:00	31.676	0	28.456	0	31.37	0	NA	NA	28.456	0	28.357	0
474	2017-09-14 02:00:00	31.676	0	28.357	0	31.983	0	NA	NA	28.357	0	28.357	0
475	2017-09-14 03:00:00	31.574	0	28.357	0	31.37	0	NA	NA	28.357	0	28.357	0
476	2017-09-14 04:00:00	31.472	0	28.357	0	31.88	0	NA	NA	28.357	0	28.357	0
477	2017-09-14 05:00:00	31.472	0	28.357	0	31.37	0	NA	NA	28.357	0	28.357	0
478	2017-09-14 06:00:00	31.37	0	28.258	0	31.778	0	NA	NA	28.258	0	28.258	0
479	2017-09-14 07:00:00	31.574	5511.1	28.357	290.6	31.676	183	NA	NA	28.357	495.1	28.258	32.3
480	2017-09-14 08:00:00	31.778	1044.1	28.456	419.8	31.778	301.4	NA	NA	28.456	570.5	28.357	75.3
481	2017-09-14 09:00:00	31.268	5511.1	28.555	613.5	31.574	376.7	NA	NA	29.053	1356.3	28.456	215.3
482	2017-09-14 10:00:00	31.574	2325	28.853	1463.9	31.88	581.3	NA	NA	29.452	2411.1	28.555	247.6
483	2017-09-14 11:00:00	31.472	1980.6	29.252	2152.8	31.574	925.7	NA	NA	29.652	1722.2	29.053	796.5
484	2017-09-14 12:00:00	31.37	2497.2	29.352	3788.9	32.188	2411.1	NA	NA	29.352	1636.1	29.152	2755.6
485	2017-09-14 13:00:00	31.268	1808.3	29.152	3788.9	31.676	3616.7	NA	NA	29.152	1980.6	29.053	1119.5
486	2017-09-14 14:00:00	31.778	1065.6	29.152	1980.6	32.188	1130.2	NA	NA	29.053	861.1	29.053	409
487	2017-09-14 15:00:00	31.064	226	29.053	398.3	31.37	161.5	NA	NA	29.053	64.6	28.953	86.1
488	2017-09-14 16:00:00	31.472	161.5	28.853	322.9	31.983	150.7	NA	NA	28.853	75.3	28.853	43.1
489	2017-09-14 17:00:00	31.574	322.9	28.853	387.5	31.778	204.5	NA	NA	28.754	150.7	28.754	53.8
490	2017-09-14 18:00:00	31.37	32.3	28.853	53.8	31.574	21.5	NA	NA	28.853	10.8	28.853	0
491	2017-09-14 19:00:00	31.166	0	28.754	0	31.88	0	NA	NA	28.655	0	28.655	0
492	2017-09-14 20:00:00	31.472	0	28.655	0	31.472	0	NA	NA	28.555	0	28.655	0
493	2017-09-14 21:00:00	31.472	0	28.555	0	31.983	0	NA	NA	28.555	0	28.555	0
494	2017-09-14 22:00:00	31.472	0	28.456	0	31.37	0	NA	NA	28.456	0	28.456	0
495	2017-09-14 23:00:00	31.472	0	28.456	0	32.086	0	NA	NA	28.456	0	28.456	0
496	2017-09-15	31.472	0	28.456	0	31.574	0	NA	NA	28.456	0	28.456	0
497	2017-09-15 01:00:00	31.472	0	28.456	0	31.88	0	NA	NA	28.456	0	28.456	0
498	2017-09-15 02:00:00	31.472	0	28.456	0	31.676	0	NA	NA	28.456	0	28.456	0
499	2017-09-15 03:00:00	31.37	0	28.456	0	31.574	0	NA	NA	28.456	0	28.357	0
500	2017-09-15 04:00:00	31.37	0	28.456	0	31.983	0	NA	NA	28.456	0	28.456	0
501	2017-09-15 05:00:00	31.37	0	28.456	0	31.37	0	NA	NA	28.456	0	28.456	0
502	2017-09-15 06:00:00	31.472	0	28.357	0	31.983	0	NA	NA	28.357	0	28.357	0
503	2017-09-15 07:00:00	31.676	1463.9	28.357	193.8	31.472	139.9	NA	NA	28.357	139.9	28.357	64.6
504	2017-09-15 08:00:00	31.37	731.9	28.456	602.8	31.778	366	NA	NA	28.456	333.7	28.456	129.2
505	2017-09-15 09:00:00	31.064	2238.9	28.555	861.1	31.472	527.4	NA	NA	28.754	710.4	28.456	269.1
506	2017-09-15 10:00:00	31.166	2583.4	28.655	2238.9	31.88	1022.6	NA	NA	29.053	1980.6	28.555	635.1
507	2017-09-15 11:00:00	31.37	1227.1	28.754	1550	31.37	958	NA	NA	28.853	807.3	28.555	301.4
508	2017-09-15 12:00:00	31.166	1636.1	28.853	2411.1	31.983	1463.9	NA	NA	28.754	1151.7	28.754	527.4
509	2017-09-15 13:00:00	30.963	1808.3	28.953	3616.7	31.574	2583.4	NA	NA	28.953	1550	28.953	882.6
510	2017-09-15 14:00:00	30.76	990.3	28.953	1636.1	31.983	1011.8	NA	NA	28.953	850.4	28.953	409
511	2017-09-15 15:00:00	31.268	2755.6	29.053	3616.7	31.574	1550	NA	NA	28.953	699.7	28.754	279.9
512	2017-09-15 16:00:00	30.76	656.6	28.655	947.2	31.88	645.8	NA	NA	28.655	602.8	28.655	129.2
513	2017-09-15 17:00:00	30.76	484.4	28.655	785.8	32.086	430.6	NA	NA	28.655	172.2	28.754	118.4
514	2017-09-15 18:00:00	30.963	139.9	28.555	204.5	31.37	96.9	NA	NA	28.655	53.8	28.655	43.1
515	2017-09-15 19:00:00	31.064	0	28.555	0	31.778	0	NA	NA	28.555	0	28.655	0
516	2017-09-15 20:00:00	30.963	0	28.357	0	31.88	0	NA	NA	28.456	0	28.456	0
517	2017-09-15 21:00:00	30.862	0	28.357	0	31.983	0	NA	NA	28.456	0	28.456	0
518	2017-09-15 22:00:00	30.963	0	28.357	0	31.574	0	NA	NA	28.456	0	28.456	0
519	2017-09-15 23:00:00	30.76	0	28.258	0	31.37	0	NA	NA	28.357	0	28.357	0
520	2017-09-16	30.659	0	28.258	0	31.472	0	NA	NA	28.357	0	28.357	0
521	2017-09-16 01:00:00	30.76	0	28.258	0	31.574	0	NA	NA	28.357	0	28.258	0
522	2017-09-16 02:00:00	30.76	0	28.159	0	31.676	0	NA	NA	28.258	0	28.258	0
523	2017-09-16 03:00:00	30.558	0	28.159	0	31.574	0	NA	NA	28.258	0	28.258	0
524	2017-09-16 04:00:00	30.356	0	28.06	0	31.37	0	NA	NA	28.258	0	28.159	0
525	2017-09-16 05:00:00	30.255	0	28.06	0	31.268	0	NA	NA	28.159	0	28.159	0
526	2017-09-16 06:00:00	30.154	0	28.06	0	31.166	0	NA	NA	28.159	0	28.06	0
527	2017-09-16 07:00:00	30.054	236.8	27.961	172.2	31.064	96.9	NA	NA	28.06	43.1	28.06	32.3
528	2017-09-16 08:00:00	30.054	398.3	27.961	495.1	31.064	247.6	NA	NA	28.159	150.7	28.06	107.6
529	2017-09-16 09:00:00	30.154	602.8	27.961	559.7	31.064	376.7	NA	NA	28.159	247.6	28.06	387.5
530	2017-09-16 10:00:00	30.356	2411.1	28.357	1550	31.268	667.4	NA	NA	28.853	2066.7	28.258	1033.3
531	2017-09-16 11:00:00	30.659	2411.1	28.555	1894.5	31.472	807.3	NA	NA	29.053	1550	28.555	1894.5
532	2017-09-16 12:00:00	31.166	2238.9	28.853	2669.5	31.88	2152.8	NA	NA	28.853	1141	28.953	2066.7
533	2017-09-16 13:00:00	31.268	1722.2	28.953	4477.8	31.676	2755.6	NA	NA	28.853	1808.3	29.152	1194.8
534	2017-09-16 14:00:00	31.064	1302.4	28.953	3961.1	32.291	2583.4	NA	NA	29.053	1636.1	29.053	753.5
535	2017-09-16 15:00:00	31.574	2411.1	28.853	3100	31.574	1894.5	NA	NA	28.853	527.4	28.754	484.4
536	2017-09-16 16:00:00	30.963	753.5	28.555	656.6	31.778	656.6	NA	NA	28.655	409	28.655	204.5
537	2017-09-16 17:00:00	31.064	215.3	28.456	355.2	32.086	139.9	NA	NA	28.655	129.2	28.655	32.3
538	2017-09-16 18:00:00	30.862	129.2	28.357	226	31.983	96.9	NA	NA	28.555	32.3	28.555	43.1
539	2017-09-16 19:00:00	30.963	0	28.357	0	31.983	0	NA	NA	28.555	0	28.555	0
540	2017-09-16 20:00:00	30.862	0	28.258	0	31.37	0	NA	NA	28.456	0	28.456	0
541	2017-09-16 21:00:00	30.76	0	28.159	0	31.574	0	NA	NA	28.357	0	28.357	0
542	2017-09-16 22:00:00	30.659	0	28.06	0	31.574	0	NA	NA	28.258	0	28.258	0
543	2017-09-16 23:00:00	30.659	0	28.06	0	31.778	0	NA	NA	28.258	0	28.258	0
544	2017-09-17	30.76	0	28.06	0	31.983	0	NA	NA	28.258	0	28.258	0
545	2017-09-17 01:00:00	30.76	0	27.961	0	31.983	0	NA	NA	28.159	0	28.159	0
546	2017-09-17 02:00:00	30.76	0	27.961	0	31.472	0	NA	NA	28.159	0	28.159	0
547	2017-09-17 03:00:00	30.76	0	27.961	0	31.37	0	NA	NA	28.06	0	28.159	0
548	2017-09-17 04:00:00	30.558	0	27.862	0	31.472	0	NA	NA	28.06	0	28.06	0
549	2017-09-17 05:00:00	30.558	0	27.862	0	31.472	0	NA	NA	28.06	0	28.06	0
550	2017-09-17 06:00:00	30.457	0	27.764	0	31.472	0	NA	NA	27.961	0	27.961	0
551	2017-09-17 07:00:00	30.659	5166.7	27.862	301.4	31.472	193.8	NA	NA	28.06	635.1	28.06	53.8
552	2017-09-17 08:00:00	30.963	322.9	27.961	301.4	31.778	290.6	NA	NA	28.159	129.2	28.159	86.1
553	2017-09-17 09:00:00	30.659	1280.9	27.961	1033.3	31.574	699.7	NA	NA	28.258	635.1	28.06	549
554	2017-09-17 10:00:00	30.76	1722.2	28.159	968.8	31.574	699.7	NA	NA	28.456	1184	28.258	635.1
555	2017-09-17 11:00:00	30.963	1550	28.357	1636.1	31.778	1173.3	NA	NA	28.655	505.9	28.357	613.5
556	2017-09-17 12:00:00	30.963	1636.1	28.357	1808.3	31.983	1367	NA	NA	28.555	904.2	28.555	818.1
557	2017-09-17 13:00:00	31.064	1636.1	28.456	2238.9	31.37	1980.6	NA	NA	28.555	764.2	28.655	1173.3
558	2017-09-17 14:00:00	30.963	1184	28.655	2583.4	32.188	2497.2	NA	NA	28.754	1894.5	28.754	678.1
559	2017-09-17 15:00:00	31.37	2583.4	28.555	2325	31.472	1894.5	NA	NA	28.655	1054.9	28.555	398.3
560	2017-09-17 16:00:00	30.862	688.9	28.159	484.4	31.574	312.2	NA	NA	28.357	236.8	28.357	107.6
561	2017-09-17 17:00:00	30.558	258.3	28.06	301.4	31.472	161.5	NA	NA	28.258	64.6	28.258	96.9
562	2017-09-17 18:00:00	30.457	53.8	28.06	64.6	31.472	32.3	NA	NA	28.258	10.8	28.258	10.8
563	2017-09-17 19:00:00	30.356	0	28.06	0	31.574	0	NA	NA	28.258	0	28.258	0
564	2017-09-17 20:00:00	30.054	0	27.862	0	31.472	0	NA	NA	28.06	0	28.06	0
565	2017-09-17 21:00:00	30.054	0	27.862	0	31.574	0	NA	NA	28.06	0	28.06	0
566	2017-09-17 22:00:00	29.752	0	27.665	0	31.37	0	NA	NA	27.862	0	27.862	0
567	2017-09-17 23:00:00	29.552	0	27.665	0	31.166	0	NA	NA	27.862	0	27.862	0
568	2017-09-18	29.652	0	27.764	0	31.268	0	NA	NA	27.862	0	27.961	0
569	2017-09-18 01:00:00	29.552	0	27.567	0	31.268	0	NA	NA	27.764	0	27.764	0
570	2017-09-18 02:00:00	29.552	0	27.665	0	31.166	0	NA	NA	27.764	0	27.764	0
571	2017-09-18 03:00:00	29.452	0	27.567	0	31.064	0	NA	NA	27.764	0	27.764	0
572	2017-09-18 04:00:00	29.652	0	27.567	0	31.268	0	NA	NA	27.764	0	27.764	0
573	2017-09-18 05:00:00	29.752	0	27.567	0	31.574	0	NA	NA	27.764	0	27.764	0
574	2017-09-18 06:00:00	29.552	0	27.468	0	31.472	0	NA	NA	27.567	0	27.665	0
575	2017-09-18 07:00:00	29.552	4305.6	27.468	322.9	31.37	258.3	NA	NA	27.665	452.1	27.567	64.6
576	2017-09-18 08:00:00	29.853	3616.7	27.665	613.5	31.37	462.9	NA	NA	27.862	376.7	27.665	301.4
577	2017-09-18 09:00:00	29.853	839.6	27.567	592	31.268	559.7	NA	NA	27.764	301.4	27.665	247.6
578	2017-09-18 10:00:00	30.356	3100	27.961	1980.6	31.37	979.5	NA	NA	28.456	2325	27.862	688.9
579	2017-09-18 11:00:00	30.963	2325	28.159	1980.6	31.676	947.2	NA	NA	28.655	1463.9	28.258	1130.2
580	2017-09-18 12:00:00	31.574	2497.2	28.655	2238.9	32.086	1808.3	NA	NA	28.555	473.6	28.555	3444.5
581	2017-09-18 13:00:00	31.778	1345.5	28.655	2152.8	31.778	2411.1	NA	NA	28.853	1550	28.655	1636.1
582	2017-09-18 14:00:00	31.778	861.1	28.456	936.5	31.778	1636.1	NA	NA	28.456	462.9	28.456	484.4
583	2017-09-18 15:00:00	32.086	2497.2	28.456	1808.3	31.676	1550	NA	NA	28.357	624.3	28.258	333.7
584	2017-09-18 16:00:00	30.862	430.6	28.06	344.4	31.88	322.9	NA	NA	28.159	161.5	28.159	161.5
585	2017-09-18 17:00:00	30.963	215.3	27.961	172.2	31.983	129.2	NA	NA	28.159	150.7	28.159	398.3
586	2017-09-18 18:00:00	31.268	96.9	27.961	64.6	31.268	53.8	NA	NA	28.06	96.9	28.159	75.3
587	2017-09-18 19:00:00	31.064	0	27.764	0	31.472	0	NA	NA	27.961	0	27.961	0
588	2017-09-18 20:00:00	30.862	0	27.665	0	31.574	0	NA	NA	27.764	0	27.862	0
589	2017-09-18 21:00:00	30.558	0	27.567	0	31.37	0	NA	NA	27.665	0	27.665	0
590	2017-09-18 22:00:00	30.862	0	27.567	0	31.676	0	NA	NA	27.764	0	27.764	0
591	2017-09-18 23:00:00	30.76	0	27.567	0	31.778	0	NA	NA	27.665	0	27.665	0
592	2017-09-19	30.76	0	27.567	0	31.778	0	NA	NA	27.665	0	27.665	0
593	2017-09-19 01:00:00	31.676	0	27.764	0	31.472	0	NA	NA	27.764	0	27.764	0
594	2017-09-19 02:00:00	31.778	0	27.665	0	31.574	0	NA	NA	27.665	0	27.764	0
595	2017-09-19 03:00:00	30.963	0	27.567	0	31.778	0	NA	NA	27.665	0	27.665	0
596	2017-09-19 04:00:00	31.37	0	27.567	0	31.983	0	NA	NA	27.665	0	27.665	0
597	2017-09-19 05:00:00	31.574	0	27.567	0	31.472	0	NA	NA	27.665	0	27.665	0
598	2017-09-19 06:00:00	30.963	0	27.468	0	31.778	0	NA	NA	27.567	0	27.567	0
599	2017-09-19 07:00:00	30.862	398.3	27.37	139.9	31.676	96.9	NA	NA	27.468	96.9	27.468	53.8
600	2017-09-19 08:00:00	31.064	1377.8	27.468	495.1	31.268	96.9	NA	NA	27.567	462.9	27.567	107.6
601	2017-09-19 09:00:00	31.268	3100	27.567	441.3	30.862	183	NA	NA	27.862	4477.8	27.567	172.2
602	2017-09-19 10:00:00	31.472	2411.1	27.862	1980.6	30.659	699.7	NA	NA	27.961	1894.5	27.764	2238.9
603	2017-09-19 11:00:00	31.778	1894.5	28.159	2066.7	30.76	559.7	NA	NA	28.258	2066.7	27.961	1808.3
604	2017-09-19 12:00:00	31.268	1808.3	28.456	2325	31.166	2927.8	NA	NA	28.159	645.8	28.456	1345.5
605	2017-09-19 13:00:00	31.268	1377.8	28.456	2066.7	31.778	559.7	NA	NA	28.159	2927.8	28.456	1076.4
606	2017-09-19 14:00:00	31.064	1463.9	28.456	2152.8	31.88	3616.7	NA	NA	28.357	1313.2	28.456	871.9
607	2017-09-19 15:00:00	31.268	1550	28.456	1808.3	31.166	947.2	NA	NA	28.357	430.6	28.159	118.4
608	2017-09-19 16:00:00	31.064	269.1	28.159	236.8	30.862	333.7	NA	NA	28.159	322.9	28.06	118.4
609	2017-09-19 17:00:00	30.963	139.9	28.06	161.5	30.659	161.5	NA	NA	28.159	107.6	28.06	53.8
610	2017-09-19 18:00:00	30.862	32.3	27.961	21.5	30.457	21.5	NA	NA	28.06	10.8	27.961	10.8
611	2017-09-19 19:00:00	30.76	0	27.961	0	30.356	0	NA	NA	27.961	0	27.862	0
612	2017-09-19 20:00:00	30.659	0	27.862	0	30.356	0	NA	NA	27.961	0	27.862	0
613	2017-09-19 21:00:00	30.558	0	27.764	0	30.356	0	NA	NA	27.862	0	27.764	0
614	2017-09-19 22:00:00	30.558	0	27.764	0	30.356	0	NA	NA	27.764	0	27.665	0
615	2017-09-19 23:00:00	30.659	0	27.764	0	30.457	0	NA	NA	27.764	0	27.764	0
616	2017-09-20	30.558	0	27.665	0	30.356	0	NA	NA	27.764	0	27.665	0
617	2017-09-20 01:00:00	30.457	0	27.665	0	30.255	0	NA	NA	27.764	0	27.567	0
618	2017-09-20 02:00:00	30.457	0	27.764	0	30.154	0	NA	NA	27.764	0	27.567	0
619	2017-09-20 03:00:00	30.558	0	27.764	0	30.255	0	NA	NA	27.764	0	27.665	0
620	2017-09-20 04:00:00	30.558	0	27.665	0	30.356	0	NA	NA	27.764	0	27.567	0
621	2017-09-20 05:00:00	30.76	0	27.665	0	30.457	0	NA	NA	27.665	0	27.567	0
622	2017-09-20 06:00:00	31.268	0	27.764	0	30.862	0	NA	NA	27.764	0	27.665	0
623	2017-09-20 07:00:00	31.676	32.3	27.665	32.3	31.064	43.1	NA	NA	27.665	21.5	27.665	0
624	2017-09-20 08:00:00	31.574	279.9	27.665	258.3	30.963	269.1	NA	NA	27.665	150.7	27.567	86.1
625	2017-09-20 09:00:00	31.37	441.3	27.665	645.8	30.862	613.5	NA	NA	27.665	452.1	27.665	215.3
626	2017-09-20 10:00:00	31.064	893.4	27.764	635.1	30.862	624.3	NA	NA	27.961	667.4	27.764	1550
627	2017-09-20 11:00:00	30.76	1205.6	27.862	1141	31.064	925.7	NA	NA	28.159	1108.7	27.961	7577.8
628	2017-09-20 12:00:00	31.268	538.2	28.258	839.6	31.574	1980.6	NA	NA	28.159	495.1	28.357	419.8
629	2017-09-20 13:00:00	31.574	1001	28.456	2669.5	31.88	538.2	NA	NA	28.555	3100	28.555	1636.1
630	2017-09-20 14:00:00	31.472	592	28.258	850.4	31.472	688.9	NA	NA	28.357	721.2	28.456	333.7
631	2017-09-20 15:00:00	31.574	409	28.06	441.3	31.472	344.4	NA	NA	28.159	312.2	28.159	236.8
632	2017-09-20 16:00:00	31.676	193.8	27.961	312.2	31.472	139.9	NA	NA	28.06	150.7	27.961	75.3
633	2017-09-20 17:00:00	31.676	161.5	27.862	183	31.37	139.9	NA	NA	27.961	75.3	27.961	75.3
634	2017-09-20 18:00:00	30.963	43.1	27.862	53.8	31.778	21.5	NA	NA	28.06	21.5	27.961	32.3
635	2017-09-20 19:00:00	31.064	0	27.764	0	31.676	0	NA	NA	27.961	0	27.862	0
636	2017-09-20 20:00:00	30.862	0	27.764	0	31.472	0	NA	NA	27.961	0	27.862	0
637	2017-09-20 21:00:00	30.76	0	27.567	0	31.268	0	NA	NA	27.862	0	27.862	0
638	2017-09-20 22:00:00	30.76	0	27.468	0	31.268	0	NA	NA	27.764	0	27.764	0
639	2017-09-20 23:00:00	30.963	0	27.468	0	31.37	0	NA	NA	27.764	0	27.764	0
640	2017-09-21	30.963	0	27.37	0	31.37	0	NA	NA	27.665	0	27.665	0
641	2017-09-21 01:00:00	31.166	0	27.468	0	31.472	0	NA	NA	27.665	0	27.665	0
642	2017-09-21 02:00:00	31.472	0	27.468	0	31.778	0	NA	NA	27.665	0	27.665	0
643	2017-09-21 03:00:00	31.472	0	27.37	0	31.88	0	NA	NA	27.567	0	27.567	0
644	2017-09-21 04:00:00	31.574	0	27.37	0	31.88	0	NA	NA	27.567	0	27.567	0
645	2017-09-21 05:00:00	31.574	0	27.37	0	31.983	0	NA	NA	27.567	0	27.567	0
646	2017-09-21 06:00:00	31.574	0	27.272	0	31.88	0	NA	NA	27.567	0	27.468	0
647	2017-09-21 07:00:00	31.574	193.8	27.272	204.5	31.778	96.9	NA	NA	27.567	139.9	27.468	86.1
648	2017-09-21 08:00:00	31.676	731.9	27.468	1463.9	31.778	333.7	NA	NA	27.665	570.5	27.567	204.5
649	2017-09-21 09:00:00	31.166	861.1	27.468	602.8	31.676	183	NA	NA	27.862	947.2	27.567	258.3
650	2017-09-21 10:00:00	31.37	1550	27.665	2152.8	31.574	516.7	NA	NA	28.456	1377.8	27.665	301.4
651	2017-09-21 11:00:00	31.37	1334.7	27.764	3100	31.676	1377.8	NA	NA	28.258	2411.1	27.862	1463.9
652	2017-09-21 12:00:00	31.37	1291.7	27.862	2411.1	31.88	1636.1	NA	NA	28.159	968.8	27.961	1076.4
653	2017-09-21 13:00:00	31.268	936.5	27.862	1550	31.983	1162.5	NA	NA	28.06	742.7	28.159	1205.6
654	2017-09-21 14:00:00	31.37	1033.3	28.06	2755.6	31.574	3444.5	NA	NA	28.357	1808.3	28.258	818.1
655	2017-09-21 15:00:00	31.472	2066.7	28.357	2325	31.88	1130.2	NA	NA	28.159	656.6	27.961	139.9
656	2017-09-21 16:00:00	31.37	118.4	27.961	161.5	31.983	118.4	NA	NA	27.961	86.1	27.961	32.3
657	2017-09-21 17:00:00	31.676	269.1	27.764	462.9	31.983	215.3	NA	NA	27.862	290.6	27.862	64.6
658	2017-09-21 18:00:00	31.676	21.5	27.665	32.3	31.778	21.5	NA	NA	27.764	10.8	27.764	0
659	2017-09-21 19:00:00	31.574	0	27.665	0	31.778	0	NA	NA	27.764	0	27.665	0
660	2017-09-21 20:00:00	31.472	0	27.567	0	31.574	0	NA	NA	27.665	0	27.567	0
661	2017-09-21 21:00:00	31.166	0	27.468	0	31.37	0	NA	NA	27.567	0	27.468	0
662	2017-09-21 22:00:00	30.862	0	27.468	0	31.268	0	NA	NA	27.567	0	27.37	0
663	2017-09-21 23:00:00	30.76	0	27.37	0	31.064	0	NA	NA	27.468	0	27.37	0
664	2017-09-22	30.558	0	27.37	0	30.963	0	NA	NA	27.468	0	27.272	0
665	2017-09-22 01:00:00	30.558	0	27.37	0	31.064	0	NA	NA	27.468	0	27.272	0
666	2017-09-22 02:00:00	30.862	0	27.37	0	31.268	0	NA	NA	27.468	0	27.37	0
667	2017-09-22 03:00:00	30.963	0	27.37	0	31.37	0	NA	NA	27.468	0	27.272	0
668	2017-09-22 04:00:00	31.064	0	27.37	0	31.574	0	NA	NA	27.468	0	27.272	0
669	2017-09-22 05:00:00	31.268	0	27.37	0	31.778	0	NA	NA	27.37	0	27.272	0
670	2017-09-22 06:00:00	31.37	0	27.37	0	31.778	0	NA	NA	27.37	0	27.272	0
671	2017-09-22 07:00:00	31.574	107.6	27.37	269.1	31.88	86.1	NA	NA	27.468	64.6	27.272	21.5
672	2017-09-22 08:00:00	31.37	387.5	27.468	1722.2	32.086	161.5	NA	NA	27.567	624.3	27.272	75.3
673	2017-09-22 09:00:00	31.676	1065.6	27.567	1130.2	31.472	333.7	NA	NA	27.862	1345.5	27.468	139.9
674	2017-09-22 10:00:00	31.268	505.9	27.764	1313.2	31.88	559.7	NA	NA	27.961	656.6	27.665	204.5
675	2017-09-22 11:00:00	31.778	387.5	27.862	602.8	31.574	236.8	NA	NA	27.961	312.2	27.862	322.9
676	2017-09-22 12:00:00	31.472	290.6	27.862	462.9	31.983	721.2	NA	NA	27.961	247.6	28.06	183
677	2017-09-22 13:00:00	31.064	290.6	27.862	473.6	31.37	322.9	NA	NA	27.862	312.2	28.06	96.9
678	2017-09-22 14:00:00	31.472	301.4	27.764	409	31.983	409	NA	NA	27.862	366	27.961	107.6
679	2017-09-22 15:00:00	31.472	419.8	27.567	516.7	31.983	1184	NA	NA	27.764	409	27.764	107.6
680	2017-09-22 16:00:00	31.37	602.8	27.665	441.3	31.472	409	NA	NA	27.764	290.6	27.764	129.2
681	2017-09-22 17:00:00	31.37	204.5	27.567	107.6	31.676	193.8	NA	NA	27.764	150.7	27.665	32.3
682	2017-09-22 18:00:00	31.574	43.1	27.468	21.5	31.778	21.5	NA	NA	27.764	10.8	27.567	0
683	2017-09-22 19:00:00	30.963	0	27.37	0	31.88	0	NA	NA	27.665	0	27.567	0
684	2017-09-22 20:00:00	31.268	0	27.37	0	32.086	0	NA	NA	27.665	0	27.468	0
685	2017-09-22 21:00:00	31.472	0	27.272	0	31.983	0	NA	NA	27.567	0	27.468	0
686	2017-09-22 22:00:00	31.268	0	27.173	0	31.778	0	NA	NA	27.468	0	27.272	0
687	2017-09-22 23:00:00	31.166	0	27.075	0	31.676	0	NA	NA	27.468	0	27.272	0
688	2017-09-23	31.166	0	27.075	0	31.574	0	NA	NA	27.468	0	27.173	0
689	2017-09-23 01:00:00	31.166	0	27.075	0	31.472	0	NA	NA	27.468	0	27.173	0
690	2017-09-23 02:00:00	31.37	0	27.075	0	31.676	0	NA	NA	27.468	0	27.272	0
691	2017-09-23 03:00:00	31.778	0	27.173	0	32.086	0	NA	NA	27.468	0	27.272	0
692	2017-09-23 04:00:00	31.166	0	27.173	0	31.472	0	NA	NA	27.468	0	27.272	0
693	2017-09-23 05:00:00	31.574	0	27.173	0	31.778	0	NA	NA	27.37	0	27.272	0
694	2017-09-23 06:00:00	31.472	0	26.977	0	31.778	0	NA	NA	27.37	0	27.173	0
695	2017-09-23 07:00:00	31.676	2755.6	27.075	1722.2	31.88	75.3	NA	NA	27.37	279.9	27.173	43.1
696	2017-09-23 08:00:00	31.064	505.9	27.173	742.7	31.268	215.3	NA	NA	27.567	452.1	27.272	107.6
697	2017-09-23 09:00:00	31.676	2755.6	27.37	796.5	31.778	473.6	NA	NA	27.961	656.6	27.37	269.1
698	2017-09-23 10:00:00	31.166	1808.3	27.764	1636.1	31.88	549	NA	NA	28.456	1894.5	27.567	258.3
699	2017-09-23 11:00:00	31.88	2927.8	28.159	1377.8	31.676	462.9	NA	NA	28.456	1980.6	28.159	1270.1
700	2017-09-23 12:00:00	31.37	2066.7	28.456	1894.5	31.983	2755.6	NA	NA	28.258	1141	28.555	1237.9
701	2017-09-23 13:00:00	31.472	958	28.555	1227.1	31.676	3272.2	NA	NA	28.555	2669.5	29.053	1463.9
702	2017-09-23 14:00:00	31.268	1463.9	28.754	1894.5	32.291	3272.2	NA	NA	28.456	1808.3	28.754	1722.2
703	2017-09-23 15:00:00	31.676	473.6	28.258	301.4	31.574	505.9	NA	NA	28.06	193.8	28.258	129.2
704	2017-09-23 16:00:00	31.166	742.7	28.06	344.4	31.778	462.9	NA	NA	27.961	322.9	28.06	172.2
705	2017-09-23 17:00:00	31.574	312.2	27.862	172.2	31.676	172.2	NA	NA	27.862	150.7	27.862	53.8
706	2017-09-23 18:00:00	31.064	43.1	27.665	32.3	31.88	21.5	NA	NA	27.764	10.8	27.764	0
707	2017-09-23 19:00:00	31.574	0	27.665	0	31.676	0	NA	NA	27.764	0	27.665	0
708	2017-09-23 20:00:00	30.963	0	27.468	0	31.676	0	NA	NA	27.665	0	27.567	0
709	2017-09-23 21:00:00	31.472	0	27.468	0	31.676	0	NA	NA	27.665	0	27.567	0
710	2017-09-23 22:00:00	31.574	0	27.37	0	31.88	0	NA	NA	27.665	0	27.468	0
711	2017-09-23 23:00:00	30.963	0	27.468	0	31.268	0	NA	NA	27.665	0	27.567	0
712	2017-09-24	31.574	0	27.37	0	31.778	0	NA	NA	27.468	0	27.37	0
713	2017-09-24 01:00:00	31.064	0	27.173	0	31.88	0	NA	NA	27.37	0	27.272	0
714	2017-09-24 02:00:00	31.37	0	27.173	0	31.983	0	NA	NA	27.37	0	27.272	0
715	2017-09-24 03:00:00	31.574	0	27.075	0	31.983	0	NA	NA	27.37	0	27.173	0
716	2017-09-24 04:00:00	31.676	0	27.075	0	31.983	0	NA	NA	27.37	0	27.173	0
717	2017-09-24 05:00:00	31.166	0	27.075	0	31.472	0	NA	NA	27.37	0	27.173	0
718	2017-09-24 06:00:00	31.472	0	27.075	0	31.676	0	NA	NA	27.37	0	27.173	0
719	2017-09-24 07:00:00	31.676	3272.2	27.075	1011.8	31.88	96.9	NA	NA	27.468	193.8	27.173	43.1
720	2017-09-24 08:00:00	31.064	785.8	27.272	1173.3	32.086	269.1	NA	NA	27.567	635.1	27.272	409
721	2017-09-24 09:00:00	31.88	2497.2	27.468	602.8	31.574	279.9	NA	NA	27.961	1550	27.468	236.8
722	2017-09-24 10:00:00	31.166	376.7	27.468	247.6	31.88	226	NA	NA	27.567	161.5	27.468	96.9
723	2017-09-24 11:00:00	31.676	441.3	27.468	301.4	31.676	538.2	NA	NA	27.567	204.5	27.567	172.2
724	2017-09-24 12:00:00	31.676	1463.9	27.862	1044.1	32.086	850.4	NA	NA	27.764	1377.8	27.961	538.2
725	2017-09-24 13:00:00	31.064	1227.1	28.258	1291.7	31.574	3788.9	NA	NA	28.357	2238.9	28.655	1313.2
726	2017-09-24 14:00:00	31.676	1324	28.456	2066.7	31.064	4994.5	NA	NA	28.555	1808.3	28.456	1087.2
727	2017-09-24 15:00:00	31.574	2238.9	28.456	1636.1	30.356	796.5	NA	NA	28.357	624.3	28.06	172.2
728	2017-09-24 16:00:00	31.37	796.5	28.06	527.4	30.154	1011.8	NA	NA	28.159	549	27.961	269.1
729	2017-09-24 17:00:00	31.472	204.5	27.862	139.9	29.953	150.7	NA	NA	27.961	161.5	27.862	43.1
730	2017-09-24 18:00:00	31.574	32.3	27.862	10.8	29.953	10.8	NA	NA	27.764	10.8	27.862	0
731	2017-09-24 19:00:00	31.676	0	27.862	0	29.953	0	NA	NA	27.665	0	27.862	0
732	2017-09-24 20:00:00	30.963	0	27.764	0	29.953	0	NA	NA	27.665	0	27.764	0
733	2017-09-24 21:00:00	31.37	0	27.764	0	29.853	0	NA	NA	27.567	0	27.764	0
734	2017-09-24 22:00:00	31.574	0	27.665	0	29.752	0	NA	NA	27.567	0	27.764	0
735	2017-09-24 23:00:00	31.676	0	27.665	0	29.853	0	NA	NA	27.567	0	27.764	0
736	2017-09-25	31.574	0	27.567	0	29.752	0	NA	NA	27.468	0	27.665	0
737	2017-09-25 01:00:00	31.574	0	27.567	0	29.752	0	NA	NA	27.37	0	27.567	0
738	2017-09-25 02:00:00	31.778	0	27.567	0	29.752	0	NA	NA	27.37	0	27.567	0
739	2017-09-25 03:00:00	31.166	0	27.567	0	29.752	0	NA	NA	27.37	0	27.567	0
740	2017-09-25 04:00:00	31.574	0	27.468	0	29.853	0	NA	NA	27.272	0	27.468	0
741	2017-09-25 05:00:00	30.963	0	27.468	0	30.054	0	NA	NA	27.173	0	27.37	0
742	2017-09-25 06:00:00	31.472	0	27.468	0	30.154	0	NA	NA	27.173	0	27.37	0
743	2017-09-25 07:00:00	31.37	495.1	27.468	193.8	30.356	139.9	NA	NA	27.173	183	27.37	64.6
744	2017-09-25 08:00:00	31.472	430.6	27.468	301.4	30.558	269.1	NA	NA	27.272	183	27.468	75.3
745	2017-09-25 09:00:00	31.268	279.9	27.567	107.6	30.76	64.6	NA	NA	27.468	107.6	27.468	32.3
746	2017-09-25 10:00:00	31.778	1291.7	27.764	871.9	30.963	322.9	NA	NA	27.961	1636.1	27.567	247.6
747	2017-09-25 11:00:00	31.472	635.1	28.06	419.8	31.37	581.3	NA	NA	28.357	430.6	28.06	258.3
748	2017-09-25 12:00:00	31.064	1237.9	28.159	1550	31.983	1463.9	NA	NA	28.159	710.4	28.159	613.5
749	2017-09-25 13:00:00	31.676	850.4	28.258	1636.1	31.778	3788.9	NA	NA	28.655	1894.5	28.655	1345.5
750	2017-09-25 14:00:00	31.268	1280.9	28.555	1980.6	32.086	3616.7	NA	NA	28.853	1151.7	28.357	635.1
751	2017-09-25 15:00:00	31.983	1248.6	28.655	1636.1	31.472	495.1	NA	NA	29.152	322.9	28.159	75.3
752	2017-09-25 16:00:00	31.166	215.3	28.258	312.2	31.676	312.2	NA	NA	28.853	118.4	28.06	96.9
753	2017-09-25 17:00:00	31.676	107.6	28.06	129.2	31.778	96.9	NA	NA	28.456	75.3	28.06	43.1
754	2017-09-25 18:00:00	30.963	10.8	27.961	21.5	31.778	21.5	NA	NA	28.159	0	27.961	0
755	2017-09-25 19:00:00	31.778	0	27.961	0	31.88	0	NA	NA	27.961	0	27.961	0
756	2017-09-25 20:00:00	31.166	0	28.06	0	31.983	0	NA	NA	27.862	0	28.06	0
757	2017-09-25 21:00:00	31.574	0	28.159	0	31.574	0	NA	NA	27.764	0	28.06	0
758	2017-09-25 22:00:00	31.268	0	28.159	0	31.574	0	NA	NA	27.764	0	28.06	0
759	2017-09-25 23:00:00	31.472	0	28.06	0	31.88	0	NA	NA	27.665	0	28.06	0
760	2017-09-26	31.472	0	28.06	0	32.086	0	NA	NA	27.665	0	28.06	0
761	2017-09-26 01:00:00	31.268	0	28.06	0	31.472	0	NA	NA	27.567	0	27.961	0
762	2017-09-26 02:00:00	31.574	0	27.961	0	31.88	0	NA	NA	27.567	0	27.961	0
763	2017-09-26 03:00:00	31.064	0	27.862	0	31.778	0	NA	NA	27.468	0	27.862	0
764	2017-09-26 04:00:00	31.574	0	27.764	0	31.574	0	NA	NA	27.272	0	27.665	0
765	2017-09-26 05:00:00	31.064	0	27.665	0	31.88	0	NA	NA	27.173	0	27.665	0
766	2017-09-26 06:00:00	31.574	0	27.567	0	31.676	0	NA	NA	27.075	0	27.567	0
767	2017-09-26 07:00:00	31.166	96.9	27.665	75.3	31.676	64.6	NA	NA	27.075	53.8	27.567	376.7
768	2017-09-26 08:00:00	31.676	226	27.764	183	32.086	172.2	NA	NA	27.173	107.6	27.665	269.1
769	2017-09-26 09:00:00	31.064	1636.1	27.764	1076.4	31.37	376.7	NA	NA	27.37	1636.1	27.764	322.9
770	2017-09-26 10:00:00	31.472	1248.6	28.159	1550	31.268	785.8	NA	NA	28.06	1313.2	27.961	5166.7
771	2017-09-26 11:00:00	31.37	2325	28.456	1808.3	31.064	1044.1	NA	NA	28.555	2152.8	28.456	5511.1
772	2017-09-26 12:00:00	31.37	1550	28.754	2066.7	31.676	3100	NA	NA	28.456	914.9	28.754	3616.7
773	2017-09-26 13:00:00	31.166	312.2	28.456	312.2	31.778	366	NA	NA	28.357	172.2	28.456	64.6
774	2017-09-26 14:00:00	31.37	538.2	28.754	882.6	32.291	3616.7	NA	NA	28.655	1248.6	28.655	710.4
775	2017-09-26 15:00:00	31.778	1377.8	28.754	1894.5	31.574	624.3	NA	NA	28.655	925.7	28.555	3100
776	2017-09-26 16:00:00	31.166	269.1	28.456	279.9	32.086	333.7	NA	NA	28.456	161.5	28.456	699.7
777	2017-09-26 17:00:00	31.676	139.9	28.258	107.6	31.37	107.6	NA	NA	28.357	75.3	28.357	118.4
778	2017-09-26 18:00:00	31.37	21.5	28.159	10.8	31.778	10.8	NA	NA	28.258	0	28.258	64.6
779	2017-09-26 19:00:00	31.268	0	28.06	0	31.472	0	NA	NA	28.159	0	28.159	0
780	2017-09-26 20:00:00	31.676	0	28.06	0	31.472	0	NA	NA	28.159	0	28.159	0
781	2017-09-26 21:00:00	31.064	0	28.159	0	31.574	0	NA	NA	28.159	0	28.159	0
782	2017-09-26 22:00:00	31.574	0	28.06	0	31.778	0	NA	NA	28.06	0	28.06	0
783	2017-09-26 23:00:00	31.778	0	27.961	0	31.983	0	NA	NA	28.06	0	28.06	0
784	2017-09-27	31.166	0	27.862	0	31.268	0	NA	NA	27.961	0	27.961	0
785	2017-09-27 01:00:00	31.676	0	27.764	0	31.778	0	NA	NA	27.961	0	27.961	0
786	2017-09-27 02:00:00	31.064	0	27.862	0	31.778	0	NA	NA	27.961	0	27.961	0
787	2017-09-27 03:00:00	31.472	0	27.764	0	31.676	0	NA	NA	27.961	0	27.961	0
788	2017-09-27 04:00:00	31.676	0	27.665	0	31.983	0	NA	NA	27.961	0	27.961	0
789	2017-09-27 05:00:00	31.064	0	27.567	0	31.37	0	NA	NA	27.862	0	27.862	0
790	2017-09-27 06:00:00	31.37	0	27.567	0	31.88	0	NA	NA	27.862	0	27.862	0
791	2017-09-27 07:00:00	31.676	850.4	27.567	613.5	31.676	107.6	NA	NA	27.862	344.4	27.862	419.8
792	2017-09-27 08:00:00	31.574	236.8	27.665	269.1	31.676	139.9	NA	NA	27.961	193.8	27.862	43.1
793	2017-09-27 09:00:00	30.356	1636.1	27.862	635.1	30.659	387.5	NA	NA	28.258	1173.3	27.961	1980.6
794	2017-09-27 10:00:00	29.152	979.5	28.159	1550	29.552	495.1	NA	NA	28.456	1550	28.06	5511.1
795	2017-09-27 11:00:00	29.652	882.6	28.357	678.1	30.054	1054.9	NA	NA	28.456	667.4	28.357	861.1
796	2017-09-27 12:00:00	29.853	2583.4	28.754	1894.5	30.255	3616.7	NA	NA	28.456	1313.2	28.754	5166.7
797	2017-09-27 13:00:00	28.853	1248.6	28.655	1463.9	30.054	3444.5	NA	NA	28.754	2411.1	28.853	6544.5
798	2017-09-27 14:00:00	28.555	656.6	28.655	742.7	29.853	3272.2	NA	NA	28.754	462.9	28.853	1011.8
799	2017-09-27 15:00:00	28.357	796.5	28.456	742.7	29.352	893.4	NA	NA	28.555	462.9	28.555	570.5
800	2017-09-27 16:00:00	28.456	247.6	28.456	204.5	29.053	183	NA	NA	28.555	139.9	28.456	290.6
801	2017-09-27 17:00:00	28.258	96.9	28.258	139.9	28.655	150.7	NA	NA	28.258	32.3	28.357	107.6
802	2017-09-27 18:00:00	28.159	21.5	28.258	21.5	28.357	32.3	NA	NA	28.258	0	28.357	0
803	2017-09-27 19:00:00	28.06	0	28.159	0	28.06	0	NA	NA	28.159	0	28.258	0
804	2017-09-27 20:00:00	27.862	0	27.961	0	27.862	0	NA	NA	28.06	0	28.159	0
805	2017-09-27 21:00:00	27.764	0	27.961	0	27.665	0	NA	NA	28.06	0	28.159	0
806	2017-09-27 22:00:00	27.764	0	27.961	0	27.567	0	NA	NA	28.06	0	28.159	0
807	2017-09-27 23:00:00	27.665	0	27.862	0	27.468	0	NA	NA	27.961	0	28.06	0
808	2017-09-28	27.567	0	27.862	0	27.272	0	NA	NA	27.961	0	28.06	0
809	2017-09-28 01:00:00	27.468	0	27.764	0	27.173	0	NA	NA	27.961	0	28.06	0
810	2017-09-28 02:00:00	27.37	0	27.665	0	26.977	0	NA	NA	27.961	0	28.06	0
811	2017-09-28 03:00:00	27.468	0	27.764	0	26.977	0	NA	NA	27.961	0	28.06	0
812	2017-09-28 04:00:00	27.468	0	27.764	0	26.977	0	NA	NA	27.862	0	28.06	0
813	2017-09-28 05:00:00	27.567	0	27.862	0	26.977	0	NA	NA	27.862	0	27.961	0
814	2017-09-28 06:00:00	27.468	0	27.764	0	26.977	0	NA	NA	27.764	0	27.862	0
815	2017-09-28 07:00:00	27.468	247.6	27.764	699.7	26.977	75.3	NA	NA	27.764	96.9	27.862	53.8
816	2017-09-28 08:00:00	27.665	193.8	27.764	376.7	26.977	139.9	NA	NA	27.764	236.8	27.862	107.6
817	2017-09-28 09:00:00	28.06	1377.8	28.06	1636.1	27.173	193.8	NA	NA	28.159	1377.8	28.06	473.6
818	2017-09-28 10:00:00	28.357	1334.7	28.357	3961.1	27.272	559.7	NA	NA	28.357	1076.4	28.159	731.9
819	2017-09-28 11:00:00	28.754	2066.7	28.655	2325	27.468	462.9	NA	NA	28.655	1550	28.555	4305.6
820	2017-09-28 12:00:00	28.555	419.8	28.555	592	27.764	484.4	NA	NA	28.357	452.1	28.357	409
821	2017-09-28 13:00:00	28.357	355.2	28.357	430.6	27.961	516.7	NA	NA	28.258	430.6	28.357	279.9
822	2017-09-28 14:00:00	28.159	1227.1	28.258	2583.4	27.961	1205.6	NA	NA	28.258	1324	28.357	1097.9
823	2017-09-28 15:00:00	28.159	1808.3	28.258	2497.2	27.961	947.2	NA	NA	28.258	1324	28.258	312.2
824	2017-09-28 16:00:00	27.862	204.5	27.961	226	27.665	193.8	NA	NA	28.06	96.9	28.06	118.4
825	2017-09-28 17:00:00	27.567	86.1	27.764	96.9	27.468	107.6	NA	NA	27.862	21.5	28.06	10.8
826	2017-09-28 18:00:00	27.075	21.5	27.468	21.5	27.764	32.3	NA	NA	27.764	0	27.862	0
827	2017-09-28 19:00:00	26.977	0	27.468	0	27.961	0	NA	NA	27.764	0	27.862	0
828	2017-09-28 20:00:00	26.879	0	27.468	0	27.862	0	NA	NA	27.764	0	27.862	0
829	2017-09-28 21:00:00	26.879	0	27.468	0	27.862	0	NA	NA	27.665	0	27.862	0
830	2017-09-28 22:00:00	26.683	0	27.37	0	27.862	0	NA	NA	27.665	0	27.764	0
831	2017-09-28 23:00:00	26.683	0	27.272	0	27.764	0	NA	NA	27.665	0	27.764	0
832	2017-09-29	26.683	0	27.272	0	27.862	0	NA	NA	27.665	0	27.764	0
833	2017-09-29 01:00:00	26.683	0	27.37	0	27.764	0	NA	NA	27.665	0	27.764	0
834	2017-09-29 02:00:00	26.781	0	27.468	0	27.764	0	NA	NA	27.665	0	27.764	0
835	2017-09-29 03:00:00	26.879	0	27.468	0	27.764	0	NA	NA	27.665	0	27.764	0
836	2017-09-29 04:00:00	26.781	0	27.37	0	27.665	0	NA	NA	27.567	0	27.665	0
837	2017-09-29 05:00:00	26.879	0	27.37	0	27.665	0	NA	NA	27.567	0	27.567	0
838	2017-09-29 06:00:00	26.977	0	27.37	0	27.665	0	NA	NA	27.567	0	27.567	0
839	2017-09-29 07:00:00	26.977	516.7	27.468	2411.1	27.665	204.5	NA	NA	27.567	387.5	27.665	139.9
840	2017-09-29 08:00:00	27.173	204.5	27.567	258.3	27.764	226	NA	NA	27.665	75.3	27.665	86.1
841	2017-09-29 09:00:00	27.075	602.8	27.468	807.3	27.764	527.4	NA	NA	27.665	236.8	27.764	366
842	2017-09-29 10:00:00	27.272	1130.2	27.764	3100	27.764	602.8	NA	NA	27.961	936.5	27.862	775
843	2017-09-29 11:00:00	27.567	850.4	27.961	1108.7	27.862	688.9	NA	NA	28.159	549	28.06	624.3
844	2017-09-29 12:00:00	27.468	1463.9	27.862	1722.2	28.06	1722.2	NA	NA	28.159	1227.1	28.159	925.7
845	2017-09-29 13:00:00	27.468	1054.9	27.961	1334.7	28.159	1894.5	NA	NA	28.258	1033.3	28.159	678.1
846	2017-09-29 14:00:00	27.468	1108.7	27.862	1313.2	28.06	1636.1	NA	NA	28.159	1227.1	28.159	527.4
847	2017-09-29 15:00:00	27.37	871.9	27.862	893.4	28.06	1463.9	NA	NA	28.06	839.6	28.06	387.5
848	2017-09-29 16:00:00	27.272	549	27.862	624.3	28.06	549	NA	NA	27.961	312.2	27.961	236.8
849	2017-09-29 17:00:00	27.075	215.3	27.665	247.6	27.961	301.4	NA	NA	27.764	301.4	27.862	86.1
850	2017-09-29 18:00:00	26.879	32.3	27.468	43.1	27.862	53.8	NA	NA	27.665	10.8	27.862	10.8
851	2017-09-29 19:00:00	26.683	0	27.272	0	27.862	0	NA	NA	27.665	0	27.764	0
852	2017-09-29 20:00:00	26.585	0	27.173	0	27.862	0	NA	NA	27.665	0	27.764	0
853	2017-09-29 21:00:00	26.39	0	27.075	0	27.764	0	NA	NA	27.567	0	27.665	0
854	2017-09-29 22:00:00	26.292	0	27.075	0	27.764	0	NA	NA	27.468	0	27.665	0
855	2017-09-29 23:00:00	26.292	0	26.977	0	27.764	0	NA	NA	27.468	0	27.764	0
856	2017-09-30	26.195	0	26.977	0	27.764	0	NA	NA	27.468	0	27.764	0
857	2017-09-30 01:00:00	26.292	0	27.173	0	27.862	0	NA	NA	27.567	0	27.764	0
858	2017-09-30 02:00:00	26.39	0	27.272	0	27.862	0	NA	NA	27.567	0	27.764	0
859	2017-09-30 03:00:00	26.488	0	27.37	0	27.862	0	NA	NA	27.567	0	27.764	0
860	2017-09-30 04:00:00	26.488	0	27.37	0	27.862	0	NA	NA	27.468	0	27.764	0
861	2017-09-30 05:00:00	26.39	0	27.272	0	27.764	0	NA	NA	27.468	0	27.665	0
862	2017-09-30 06:00:00	26.39	0	27.37	0	27.764	0	NA	NA	27.37	0	27.665	0
863	2017-09-30 07:00:00	26.488	516.7	27.37	2927.8	27.665	118.4	NA	NA	27.37	96.9	27.567	53.8
864	2017-09-30 08:00:00	26.585	269.1	27.567	1001	27.665	139.9	NA	NA	27.468	516.7	27.665	139.9
865	2017-09-30 09:00:00	27.075	1377.8	27.862	10333.4	27.764	204.5	NA	NA	27.862	764.2	27.764	226
866	2017-09-30 10:00:00	27.764	1141	28.357	3961.1	27.862	527.4	NA	NA	28.159	775	27.961	581.3
867	2017-09-30 11:00:00	27.961	2238.9	28.357	4305.6	27.764	904.2	NA	NA	28.258	2152.8	28.159	1550
868	2017-09-30 12:00:00	27.961	312.2	28.357	828.8	27.961	236.8	NA	NA	27.961	409	28.06	172.2
869	2017-09-30 13:00:00	28.159	387.5	28.456	764.2	28.456	1636.1	NA	NA	28.258	549	28.357	312.2
870	2017-09-30 14:00:00	28.456	958	28.853	2669.5	29.053	2755.6	NA	NA	28.655	2583.4	28.456	828.8
871	2017-09-30 15:00:00	29.053	1636.1	28.953	2583.4	29.053	441.3	NA	NA	28.853	1636.1	28.357	193.8
872	2017-09-30 16:00:00	29.152	344.4	28.754	796.5	28.754	462.9	NA	NA	28.655	333.7	28.357	204.5
873	2017-09-30 17:00:00	28.953	139.9	28.456	322.9	28.357	139.9	NA	NA	28.258	236.8	28.06	43.1
874	2017-09-30 18:00:00	28.754	21.5	28.258	43.1	28.06	21.5	NA	NA	28.06	0	28.06	0
875	2017-09-30 19:00:00	28.555	0	28.06	0	27.961	0	NA	NA	27.961	0	27.961	0
876	2017-09-30 20:00:00	28.357	0	28.06	0	27.862	0	NA	NA	27.862	0	28.06	0
877	2017-09-30 21:00:00	28.258	0	27.961	0	27.862	0	NA	NA	27.862	0	28.06	0
878	2017-09-30 22:00:00	28.06	0	27.862	0	27.665	0	NA	NA	27.862	0	27.961	0
879	2017-09-30 23:00:00	27.961	0	27.862	0	27.665	0	NA	NA	27.764	0	27.961	0
880	2017-10-01	27.961	0	27.764	0	27.567	0	NA	NA	27.764	0	27.961	0
881	2017-10-01 01:00:00	27.862	0	27.764	0	27.468	0	NA	NA	27.665	0	27.961	0
882	2017-10-01 02:00:00	27.862	0	27.665	0	27.37	0	NA	NA	27.665	0	27.961	0
883	2017-10-01 03:00:00	27.862	0	27.665	0	27.272	0	NA	NA	27.665	0	27.961	0
884	2017-10-01 04:00:00	27.764	0	27.567	0	27.173	0	NA	NA	27.567	0	27.862	0
885	2017-10-01 05:00:00	27.764	0	27.567	0	27.075	0	NA	NA	27.567	0	27.862	0
886	2017-10-01 06:00:00	27.764	0	27.567	0	26.977	0	NA	NA	27.567	0	27.862	0
887	2017-10-01 07:00:00	27.764	193.8	27.567	656.6	26.977	107.6	NA	NA	27.567	118.4	27.862	64.6
888	2017-10-01 08:00:00	27.961	452.1	27.764	645.8	27.075	312.2	NA	NA	27.665	333.7	27.961	204.5
889	2017-10-01 09:00:00	28.159	947.2	28.06	1894.5	27.272	398.3	NA	NA	27.961	656.6	28.06	344.4
890	2017-10-01 10:00:00	28.456	893.4	28.357	1097.9	27.567	581.3	NA	NA	28.258	516.7	28.159	505.9
891	2017-10-01 11:00:00	28.655	1894.5	28.655	2066.7	27.764	688.9	NA	NA	28.555	1011.8	28.357	1377.8
892	2017-10-01 12:00:00	28.555	366	28.655	387.5	27.961	344.4	NA	NA	28.357	172.2	28.159	150.7
893	2017-10-01 13:00:00	28.555	1001	28.754	1270.1	28.456	1636.1	NA	NA	28.456	1377.8	28.357	839.6
894	2017-10-01 14:00:00	28.555	462.9	29.053	484.4	28.953	355.2	NA	NA	28.754	215.3	28.357	183
895	2017-10-01 15:00:00	28.456	387.5	28.853	355.2	28.754	269.1	NA	NA	28.456	161.5	28.159	129.2
896	2017-10-01 16:00:00	28.456	312.2	28.754	312.2	28.754	279.9	NA	NA	28.357	139.9	28.357	107.6
897	2017-10-01 17:00:00	28.456	258.3	28.655	247.6	28.655	279.9	NA	NA	28.258	107.6	28.357	96.9
898	2017-10-01 18:00:00	28.357	32.3	28.555	32.3	28.555	21.5	NA	NA	28.258	10.8	28.357	10.8
899	2017-10-01 19:00:00	28.357	0	28.456	0	28.456	0	NA	NA	28.159	0	28.258	0
900	2017-10-01 20:00:00	28.258	0	28.357	0	28.258	0	NA	NA	28.159	0	28.258	0
901	2017-10-01 21:00:00	28.258	0	28.258	0	28.159	0	NA	NA	28.06	0	28.258	0
902	2017-10-01 22:00:00	28.159	0	28.06	0	27.961	0	NA	NA	27.961	0	28.06	0
903	2017-10-01 23:00:00	28.06	0	27.961	0	27.862	0	NA	NA	27.961	0	28.06	0
904	2017-10-02	28.06	0	27.862	0	27.764	0	NA	NA	27.862	0	28.159	0
905	2017-10-02 01:00:00	28.06	0	27.862	0	27.665	0	NA	NA	27.862	0	28.06	0
906	2017-10-02 02:00:00	27.961	0	27.764	0	27.567	0	NA	NA	27.862	0	28.06	0
907	2017-10-02 03:00:00	27.961	0	27.665	0	27.567	0	NA	NA	27.862	0	28.06	0
908	2017-10-02 04:00:00	27.961	0	27.665	0	27.468	0	NA	NA	27.764	0	28.06	0
909	2017-10-02 05:00:00	27.961	0	27.567	0	27.468	0	NA	NA	27.764	0	28.06	0
910	2017-10-02 06:00:00	27.862	0	27.468	0	27.37	0	NA	NA	27.764	0	28.06	0
911	2017-10-02 07:00:00	27.862	86.1	27.468	107.6	27.37	32.3	NA	NA	27.764	32.3	27.961	32.3
912	2017-10-02 08:00:00	27.961	312.2	27.665	570.5	27.37	139.9	NA	NA	27.862	398.3	28.06	107.6
913	2017-10-02 09:00:00	28.258	1194.8	27.862	2755.6	27.468	366	NA	NA	28.06	1636.1	28.159	344.4
914	2017-10-02 10:00:00	28.258	366	27.961	419.8	27.665	344.4	NA	NA	28.159	344.4	28.159	139.9
915	2017-10-02 11:00:00	28.357	452.1	28.159	602.8	27.862	495.1	NA	NA	28.159	602.8	28.159	366
916	2017-10-02 12:00:00	28.555	1033.3	28.555	1463.9	28.258	1141	NA	NA	28.357	419.8	28.456	645.8
917	2017-10-02 13:00:00	28.258	592	28.357	979.5	28.258	452.1	NA	NA	28.357	1463.9	28.258	301.4
918	2017-10-02 14:00:00	28.258	753.5	28.357	1119.5	28.159	635.1	NA	NA	28.456	409	28.456	376.7
919	2017-10-02 15:00:00	28.159	570.5	28.258	699.7	28.159	462.9	NA	NA	28.555	258.3	28.555	269.1
920	2017-10-02 16:00:00	27.961	172.2	28.06	322.9	27.961	279.9	NA	NA	28.258	290.6	28.357	53.8
921	2017-10-02 17:00:00	27.665	107.6	27.862	247.6	27.764	75.3	NA	NA	28.06	366	28.357	64.6
922	2017-10-02 18:00:00	27.37	0	27.468	10.8	27.468	0	NA	NA	27.764	21.5	28.258	0
923	2017-10-02 19:00:00	27.075	0	27.272	0	27.272	0	NA	NA	27.567	0	28.357	0
924	2017-10-02 20:00:00	26.879	0	27.075	0	27.075	0	NA	NA	27.37	0	28.258	0
925	2017-10-02 21:00:00	26.585	0	26.781	0	26.879	0	NA	NA	27.075	0	28.159	0
926	2017-10-02 22:00:00	26.39	0	26.585	0	26.585	0	NA	NA	26.879	0	28.06	0
927	2017-10-02 23:00:00	26.195	0	26.39	0	26.39	0	NA	NA	26.683	0	28.06	0
928	2017-10-03	26.195	0	26.292	0	27.272	0	NA	NA	26.585	0	28.06	0
929	2017-10-03 01:00:00	26.879	0	26.097	0	26.879	0	NA	NA	26.488	0	28.06	0
930	2017-10-03 02:00:00	26.585	0	26	0	26.585	0	NA	NA	26.292	0	27.961	0
931	2017-10-03 03:00:00	26.292	0	25.902	0	26.585	0	NA	NA	26.195	0	27.961	0
932	2017-10-03 04:00:00	26.195	0	25.805	0	27.173	0	NA	NA	26.097	0	27.862	0
933	2017-10-03 05:00:00	26.879	0	25.708	0	26.781	0	NA	NA	26	0	27.862	0
934	2017-10-03 06:00:00	26.488	0	25.708	0	26.488	0	NA	NA	25.902	0	27.862	0
935	2017-10-03 07:00:00	26.292	204.5	25.708	1065.6	27.37	161.5	NA	NA	25.902	656.6	27.862	75.3
936	2017-10-03 08:00:00	26.39	226	26	818.1	27.173	118.4	NA	NA	26.097	796.5	27.862	64.6
937	2017-10-03 09:00:00	26.977	236.8	26.781	602.8	27.272	247.6	NA	NA	26.879	710.4	27.862	75.3
938	2017-10-03 10:00:00	27.37	656.6	27.468	7233.4	27.37	581.3	NA	NA	27.468	1980.6	28.06	473.6
939	2017-10-03 11:00:00	27.665	1216.3	27.862	4477.8	27.468	452.1	NA	NA	27.961	2066.7	28.258	1334.7
940	2017-10-03 12:00:00	27.961	861.1	28.258	2411.1	27.961	1463.9	NA	NA	27.961	258.3	28.456	1033.3
941	2017-10-03 13:00:00	27.764	333.7	28.258	1980.6	28.456	6200	NA	NA	28.06	3961.1	28.655	796.5
942	2017-10-03 14:00:00	27.764	796.5	28.357	2411.1	28.655	1237.9	NA	NA	28.258	3100	28.555	656.6
943	2017-10-03 15:00:00	28.06	1463.9	28.456	2238.9	28.357	322.9	NA	NA	28.456	1001	28.357	129.2
944	2017-10-03 16:00:00	27.862	118.4	28.159	236.8	28.06	107.6	NA	NA	28.159	193.8	28.357	21.5
945	2017-10-03 17:00:00	27.665	139.9	27.862	290.6	27.862	183	NA	NA	27.961	150.7	28.357	43.1
946	2017-10-03 18:00:00	27.468	10.8	27.665	32.3	27.567	0	NA	NA	27.862	21.5	28.258	0
947	2017-10-03 19:00:00	27.075	0	27.468	0	27.272	0	NA	NA	27.764	0	28.159	0
948	2017-10-03 20:00:00	26.781	0	27.37	0	26.977	0	NA	NA	27.665	0	28.258	0
949	2017-10-03 21:00:00	26.585	0	27.272	0	26.781	0	NA	NA	27.665	0	28.159	0
950	2017-10-03 22:00:00	26.39	0	27.272	0	26.585	0	NA	NA	27.567	0	28.06	0
951	2017-10-03 23:00:00	26.195	0	27.173	0	26.39	0	NA	NA	27.567	0	27.961	0
952	2017-10-04	26.585	0	27.075	0	27.272	0	NA	NA	27.468	0	27.961	0
953	2017-10-04 01:00:00	26.879	0	27.075	0	26.977	0	NA	NA	27.567	0	27.961	0
954	2017-10-04 02:00:00	26.683	0	27.075	0	26.781	0	NA	NA	27.567	0	27.961	0
955	2017-10-04 03:00:00	26.292	0	26.977	0	26.39	0	NA	NA	27.37	0	27.862	0
956	2017-10-04 04:00:00	26.097	0	26.977	0	27.272	0	NA	NA	27.272	0	27.862	0
957	2017-10-04 05:00:00	26.977	0	26.977	0	26.879	0	NA	NA	27.272	0	27.862	0
958	2017-10-04 06:00:00	26.683	0	26.977	0	26.585	0	NA	NA	27.272	0	27.862	0
959	2017-10-04 07:00:00	26.292	53.8	26.879	139.9	26.39	21.5	NA	NA	27.173	107.6	27.764	21.5
960	2017-10-04 08:00:00	26.195	215.3	26.781	570.5	27.272	139.9	NA	NA	27.173	247.6	27.665	96.9
961	2017-10-04 09:00:00	26.292	570.5	26.781	1894.5	27.075	1097.9	NA	NA	27.075	473.6	27.862	204.5
962	2017-10-04 10:00:00	26.292	613.5	26.781	4133.4	26.879	452.1	NA	NA	27.075	1980.6	27.961	893.4
963	2017-10-04 11:00:00	26.585	1011.8	26.977	3616.7	26.977	570.5	NA	NA	27.468	1377.8	28.159	1237.9
964	2017-10-04 12:00:00	26.977	1001	27.567	3444.5	27.37	1259.4	NA	NA	27.468	1097.9	28.456	2497.2
965	2017-10-04 13:00:00	26.977	742.7	27.665	2927.8	28.357	1722.2	NA	NA	27.567	3272.2	28.655	990.3
966	2017-10-04 14:00:00	26.879	861.1	27.665	2497.2	28.357	1463.9	NA	NA	27.665	1377.8	28.555	688.9
967	2017-10-04 15:00:00	26.977	441.3	27.665	785.8	28.258	495.1	NA	NA	27.764	333.7	28.357	139.9
968	2017-10-04 16:00:00	26.879	183	27.468	484.4	28.159	172.2	NA	NA	27.665	193.8	28.258	43.1
969	2017-10-04 17:00:00	26.683	183	27.173	312.2	28.159	118.4	NA	NA	27.764	118.4	28.06	64.6
970	2017-10-04 18:00:00	26.39	10.8	26.879	21.5	27.961	10.8	NA	NA	27.961	21.5	27.961	0
971	2017-10-04 19:00:00	26.097	0	26.488	0	27.862	0	NA	NA	27.862	0	27.764	0
972	2017-10-04 20:00:00	26.879	0	26.195	0	27.764	0	NA	NA	27.764	0	27.567	0
973	2017-10-04 21:00:00	26.488	0	26	0	27.764	0	NA	NA	27.764	0	27.567	0
974	2017-10-04 22:00:00	26.195	0	25.902	0	27.862	0	NA	NA	27.862	0	27.567	0
975	2017-10-04 23:00:00	26.977	0	25.805	0	27.764	0	NA	NA	27.764	0	27.567	0
976	2017-10-05	26.683	0	25.708	0	27.764	0	NA	NA	27.862	0	27.567	0
977	2017-10-05 01:00:00	26.292	0	25.61	0	27.665	0	NA	NA	27.764	0	27.468	0
978	2017-10-05 02:00:00	26.879	0	25.513	0	27.665	0	NA	NA	27.665	0	27.468	0
979	2017-10-05 03:00:00	26.585	0	25.416	0	27.665	0	NA	NA	27.665	0	27.468	0
980	2017-10-05 04:00:00	26.195	0	25.222	0	27.567	0	NA	NA	27.567	0	27.37	0
981	2017-10-05 05:00:00	26.879	0	25.125	0	27.567	0	NA	NA	27.567	0	27.37	0
982	2017-10-05 06:00:00	26.39	0	25.125	0	27.567	0	NA	NA	27.567	0	27.37	0
983	2017-10-05 07:00:00	26.585	96.9	25.028	527.4	27.567	32.3	NA	NA	27.567	75.3	27.37	32.3
984	2017-10-05 08:00:00	26.879	150.7	25.319	602.8	27.567	204.5	NA	NA	27.567	678.1	27.37	64.6
985	2017-10-05 09:00:00	26.781	301.4	25.513	828.8	27.764	183	NA	NA	27.665	376.7	27.665	96.9
986	2017-10-05 10:00:00	26.977	710.4	26.292	10677.8	27.468	312.2	NA	NA	27.665	3100	27.862	516.7
987	2017-10-05 11:00:00	27.075	1001	26.781	3616.7	27.272	290.6	NA	NA	27.961	6544.5	28.159	1550
988	2017-10-05 12:00:00	27.468	1216.3	27.37	3444.5	27.665	301.4	NA	NA	28.06	688.9	28.357	1151.7
989	2017-10-05 13:00:00	27.567	613.5	27.764	1173.3	28.357	344.4	NA	NA	28.159	1291.7	28.456	322.9
990	2017-10-05 14:00:00	27.567	419.8	27.862	1151.7	28.655	290.6	NA	NA	28.357	710.4	28.555	258.3
991	2017-10-05 15:00:00	27.567	570.5	27.862	1054.9	28.555	462.9	NA	NA	28.456	559.7	28.555	172.2
992	2017-10-05 16:00:00	27.272	193.8	27.567	764.2	28.159	193.8	NA	NA	28.159	452.1	28.258	64.6
993	2017-10-05 17:00:00	26.879	75.3	27.173	161.5	27.862	226	NA	NA	27.862	118.4	27.961	10.8
994	2017-10-05 18:00:00	26.585	10.8	26.879	43.1	27.567	32.3	NA	NA	27.468	21.5	27.764	0
995	2017-10-05 19:00:00	26.195	0	26.39	0	27.075	0	NA	NA	27.075	0	27.37	0
996	2017-10-05 20:00:00	26.977	0	26.195	0	26.879	0	NA	NA	26.879	0	27.173	0
997	2017-10-05 21:00:00	26.585	0	26	0	26.585	0	NA	NA	26.585	0	26.879	0
998	2017-10-05 22:00:00	26.292	0	25.805	0	26.488	0	NA	NA	26.39	0	26.683	0
999	2017-10-05 23:00:00	26.781	0	25.61	0	26.488	0	NA	NA	26.292	0	26.488	0
1000	2017-10-06	26.683	0	25.513	0	26.39	0	NA	NA	26.097	0	26.292	0
1001	2017-10-06 01:00:00	26.292	0	25.416	0	26.488	0	NA	NA	26	0	26.195	0
1002	2017-10-06 02:00:00	26.097	0	25.319	0	26.488	0	NA	NA	25.902	0	26.097	0
1003	2017-10-06 03:00:00	26.781	0	25.222	0	26.488	0	NA	NA	25.805	0	26	0
1004	2017-10-06 04:00:00	26.39	0	25.125	0	26.488	0	NA	NA	25.61	0	25.805	0
1005	2017-10-06 05:00:00	26.097	0	25.028	0	26.488	0	NA	NA	25.513	0	25.708	0
1006	2017-10-06 06:00:00	26.977	0	24.931	0	26.488	0	NA	NA	25.513	0	25.61	0
1007	2017-10-06 07:00:00	26.585	64.6	24.835	236.8	26.488	32.3	NA	NA	25.416	86.1	25.61	21.5
1008	2017-10-06 08:00:00	26.39	215.3	25.125	570.5	26.488	96.9	NA	NA	25.513	538.2	25.61	96.9
1009	2017-10-06 09:00:00	26.39	441.3	25.319	2325	26.488	333.7	NA	NA	25.708	312.2	25.708	204.5
1010	2017-10-06 10:00:00	26.585	656.6	25.805	7233.4	26.488	495.1	NA	NA	26.097	2583.4	26	581.3
1011	2017-10-06 11:00:00	26.39	3961.1	26.097	301.4	26.683	204.5	NA	NA	26.292	570.5	26.292	139.9
1012	2017-10-06 12:00:00	27.961	1808.3	28.258	28933.5	26.977	1087.2	NA	NA	27.764	12400.1	28.456	4994.5
1013	2017-10-06 13:00:00	27.173	699.7	26.879	4994.5	27.665	1808.3	NA	NA	27.075	4305.6	30.659	6200
1014	2017-10-06 14:00:00	27.468	1636.1	26.879	10333.4	27.567	1194.8	NA	NA	27.173	10677.8	29.853	3100
1015	2017-10-06 15:00:00	26.488	635.1	26.292	5511.1	26.488	624.3	NA	NA	26.39	6200	26.39	904.2
1016	2017-10-06 16:00:00	25.222	1894.5	25.805	1065.6	26.488	7577.8	NA	NA	25.125	1550	26	1334.7
1017	2017-10-06 17:00:00	25.708	1334.7	25.708	839.6	26.488	5338.9	NA	NA	25.319	1076.4	26.585	936.5
1018	2017-10-06 18:00:00	25.222	10.8	25.222	0	25.61	0	NA	NA	25.319	0	25.708	0
1019	2017-10-06 19:00:00	24.835	0	24.738	0	24.738	0	NA	NA	24.835	0	24.835	0
1020	2017-10-06 20:00:00	25.028	0	25.028	0	25.319	0	NA	NA	25.125	0	25.416	0
1021	2017-10-06 21:00:00	25.805	0	25.805	0	26	0	NA	NA	25.902	0	26.097	0
1022	2017-10-06 22:00:00	25.902	0	25.805	0	25.902	0	NA	NA	25.902	0	26	0
1023	2017-10-06 23:00:00	25.708	0	25.708	0	25.805	0	NA	NA	25.805	0	25.805	0
1024	2017-10-07	25.708	0	25.61	0	25.708	0	NA	NA	25.708	0	25.708	0
1025	2017-10-07 01:00:00	25.61	0	25.61	0	25.61	0	NA	NA	25.708	0	25.61	0
1026	2017-10-07 02:00:00	25.416	0	25.319	0	25.319	0	NA	NA	25.416	0	25.319	0
1027	2017-10-07 03:00:00	25.222	0	25.125	0	24.931	0	NA	NA	25.125	0	25.028	0
1028	2017-10-07 04:00:00	25.028	0	25.028	0	24.931	0	NA	NA	25.028	0	24.931	0
1029	2017-10-07 05:00:00	24.738	0	24.738	0	24.641	0	NA	NA	24.835	0	24.545	0
1030	2017-10-07 06:00:00	24.351	0	24.351	0	24.062	0	NA	NA	24.351	0	24.062	0
1031	2017-10-07 07:00:00	24.158	118.4	24.062	0	23.869	64.6	NA	NA	24.062	21.5	23.869	10.8
1032	2017-10-07 08:00:00	24.448	1377.8	24.448	86.1	24.545	1087.2	NA	NA	24.545	301.4	24.738	183
1033	2017-10-07 09:00:00	25.61	796.5	25.513	43.1	25.902	559.7	NA	NA	25.61	172.2	26.195	107.6
1034	2017-10-07 10:00:00	26.488	387.5	26.292	21.5	26.488	247.6	NA	NA	26.39	86.1	26.781	53.8
1035	2017-10-07 11:00:00	26.683	269.1	26.488	10.8	26.585	193.8	NA	NA	26.585	53.8	26.879	32.3
1036	2017-10-07 12:00:00	26.683	333.7	26.488	21.5	26.585	247.6	NA	NA	26.585	75.3	26.781	43.1
1037	2017-10-07 13:00:00	27.075	279.9	26.879	10.8	26.879	215.3	NA	NA	26.879	53.8	27.272	32.3
1038	2017-10-07 14:00:00	26.879	344.4	26.683	21.5	26.585	258.3	NA	NA	26.683	75.3	26.879	53.8
1039	2017-10-07 15:00:00	27.075	344.4	26.781	32.3	26.977	333.7	NA	NA	26.879	96.9	27.272	43.1
1040	2017-10-07 16:00:00	27.075	0	27.468	0	26.488	0	NA	NA	26.879	10.8	26.879	0
1041	2017-10-07 17:00:00	27.173	0	26.977	0	27.075	0	NA	NA	27.173	53.8	27.075	0
1042	2017-10-07 18:00:00	27.075	0	26.977	0	27.075	0	NA	NA	26.977	0	27.075	0
1043	2017-10-07 19:00:00	26.488	0	26.585	0	26.683	0	NA	NA	26.585	0	26.683	0
1044	2017-10-07 20:00:00	26.195	0	26.292	0	26.292	0	NA	NA	26.195	0	26.292	0
1045	2017-10-07 21:00:00	26.097	0	26.097	0	26.195	0	NA	NA	26.097	0	26.195	0
1046	2017-10-07 22:00:00	25.61	0	25.61	0	25.708	0	NA	NA	25.513	0	25.708	0
1047	2017-10-07 23:00:00	25.222	0	25.222	0	25.319	0	NA	NA	25.222	0	25.319	0
1048	2017-10-08	24.931	0	24.931	0	24.931	0	NA	NA	24.835	0	24.931	0
1049	2017-10-08 01:00:00	24.835	0	24.738	0	24.835	0	NA	NA	24.738	0	24.835	0
1050	2017-10-08 02:00:00	24.448	0	24.448	0	24.448	0	NA	NA	24.351	0	24.448	0
1051	2017-10-08 03:00:00	24.158	0	24.158	0	24.158	0	NA	NA	24.062	0	24.158	0
1052	2017-10-08 04:00:00	24.158	0	24.158	0	24.158	0	NA	NA	24.062	0	24.158	0
1053	2017-10-08 05:00:00	24.158	0	24.158	0	24.158	0	NA	NA	24.062	0	24.158	0
1054	2017-10-08 06:00:00	24.158	0	24.158	0	24.062	0	NA	NA	24.062	0	24.062	0
1055	2017-10-08 07:00:00	24.158	0	24.062	0	24.062	0	NA	NA	24.062	10.8	24.062	0
1056	2017-10-08 08:00:00	24.835	0	24.738	0	24.545	0	NA	NA	24.931	53.8	24.545	0
1057	2017-10-08 09:00:00	25.708	0	25.416	0	25.319	0	NA	NA	25.513	75.3	25.222	0
1058	NA	NA	NA	NA	NA	NA	NA	NA	NA	NA	NA	NA	NA
1059	NA	NA	NA	NA	NA	NA	NA	NA	NA	NA	NA	NA	NA
1060	NA	NA	NA	NA	NA	NA	NA	NA	NA	NA	NA	NA	NA
1061	NA	NA	NA	NA	NA	NA	NA	NA	NA	NA	NA	NA	NA
1062	NA	NA	NA	NA	NA	NA	NA	NA	NA	NA	NA	NA	NA
1063	NA	NA	NA	NA	NA	NA	NA	NA	NA	NA	NA	NA	NA
1064	NA	NA	NA	NA	NA	NA	NA	NA	NA	NA	NA	NA	NA
1065	NA	NA	NA	NA	NA	NA	NA	NA	NA	NA	NA	NA	NA
1066	NA	NA	NA	NA	NA	NA	NA	NA	NA	NA	NA	NA	NA
1067	NA	NA	NA	NA	NA	NA	NA	NA	NA	NA	NA	NA	NA
1068	NA	NA	NA	NA	NA	NA	NA	NA	NA	NA	NA	NA	NA
1069	NA	NA	NA	NA	NA	NA	NA	NA	NA	NA	NA	NA	NA
1070	NA	NA	NA	NA	NA	NA	NA	NA	NA	NA	NA	NA	NA
1071	NA	NA	NA	NA	NA	NA	NA	NA	NA	NA	NA	NA	NA
1072	NA	NA	NA	NA	NA	NA	NA	NA	NA	NA	NA	NA	NA
1073	NA	NA	NA	NA	NA	NA	NA	NA	NA	NA	NA	NA	NA
1074	NA	NA	NA	NA	NA	NA	NA	NA	NA	NA	NA	NA	NA
1075	NA	NA	NA	NA	NA	NA	NA	NA	NA	NA	NA	NA	NA
1076	NA	NA	NA	NA	NA	NA	NA	NA	NA	NA	NA	NA	NA
1077	NA	NA	NA	NA	NA	NA	NA	NA	NA	NA	NA	NA	NA
1078	NA	NA	NA	NA	NA	NA	NA	NA	NA	NA	NA	NA	NA
1079	NA	NA	NA	NA	NA	NA	NA	NA	NA	NA	NA	NA	NA
1080	NA	NA	NA	NA	NA	NA	NA	NA	NA	NA	NA	NA	NA
1081	NA	NA	NA	NA	NA	NA	NA	NA	NA	NA	NA	NA	NA

## Sheet: C_Chlorophyll
Colony No.	Status	Time	Date	Chl a ug/g	Chl c2 ug/g	Tolerance
5	na	1	2017-09-01	1068.86	328.43	S
6	na	1	2017-09-01	607.57	292.5	S
10	na	1	2017-09-01	1113.18	377.09	R
13	na	1	2017-09-01	765.1	244.92	R
20	na	1	2017-09-01	816.69	267.82	S
21	na	1	2017-09-01	758.53	245.35	R
23	na	1	2017-09-01	491.62	198.63	S
25	na	1	2017-09-01	515.28	340.48	S
26	na	1	2017-09-01	911.32	320.01	R
28	na	1	2017-09-01	1161.47	431.26	S
30	na	1	2017-09-01	507.35	231.74	S
32	na	1	2017-09-01	493.14	306.39	R
45	na	1	2017-09-01	557.02	271.21	S
55	na	1	2017-09-01	598.27	271.93	S
65	na	1	2017-09-01	639.15	358.04	R
66	na	1	2017-09-01	697.14	262.56	R
69	na	1	2017-09-01	664.09	392.97	R
73	na	1	2017-09-01	1103.05	343.89	S
74	na	1	2017-09-01	1180.37	419.33	R
5	B	2	2017-10-01	345.82	176.2	S
5	NB	2	2017-10-01	1118.97	433.97	S
6	B	2	2017-10-01	479.57	279.8	S
6	NB	2	2017-10-01	1193.99	587.96	S
10	B	2	2017-10-01	276.79	123.87	R
10	NB	2	2017-10-01	1608.65	598.35	R
13	B	2	2017-10-01	589.6	213.88	R
13	NB	2	2017-10-01	1569.07	706.29	R
20	B	2	2017-10-01	473.83	246.5	S
20	NB	2	2017-10-01	653.15	363.91	S
21	B	2	2017-10-01	223.56	181.78	R
21	NB	2	2017-10-01	781.67	376.32	R
23	B	2	2017-10-01	400.19	158.07	S
23	NB	2	2017-10-01	850.96	392.36	S
25	B	2	2017-10-01	265.31	91.18	S
25	NB	2	2017-10-01	1401.5	755.43	S
26	B	2	2017-10-01	117.25	135.37	R
26	NB	2	2017-10-01	1058.91	384.32	R
28	B	2	2017-10-01	93.37	49.43	S
28	NB	2	2017-10-01	1244.39	464.78	S
30	B	2	2017-10-01	268.81	164.54	S
30	NB	2	2017-10-01	839.25	424	S
32	B	2	2017-10-01	84.71	87.35	R
32	NB	2	2017-10-01	1121.21	559.21	R
41	B	2	2017-10-01	75.73	115.42	R
41	NB	2	2017-10-01	931.13	515.27	R
45	B	2	2017-10-01	230.57	96.58	S
45	NB	2	2017-10-01	637.54	321.52	S
55	B	2	2017-10-01	327.25	146.04	S
55	NB	2	2017-10-01	973.93	499.91	S
65	B	2	2017-10-01	135.43	136.23	R
65	NB	2	2017-10-01	1147.85	602.73	R
66	B	2	2017-10-01	532.93	284.59	R
66	NB	2	2017-10-01	1068.88	487.82	R
69	B	2	2017-10-01	79.41	58.02	R
69	NB	2	2017-10-01	695.25	409.88	R
73	B	2	2017-10-01	162.65	196.15	S
73	NB	2	2017-10-01	1604.39	492.38	S
74	B	2	2017-10-01	360.01	362.14	R
74	NB	2	2017-10-01	1468.37	452.58	R

## Sheet: D_Lipid_raw_data
#	Date	Time	Baggie ID	Spp	COLONY ID	Status	Tolerance	Timepoint in Experiment	B. Pan + B. Filter (g)	[B] + Dry Coral (g)	[B] + Burn Coral (g)	Blank Corrected Dry Tissue (g)	Flask (g)	Flask + Lipid (g)	Blank Corrected Dry Lipid (g)	Total Biomass (g)	Lipid/ Biomass (g/gdw)	Sample notes	Daily lab notes
1	2020-08-22	10:24:00	BLANK	Blank	Blank	Blank	Blank	Blank	1.7988	1.7988	1.7988	0	31.3976	31.3979	0.0003				10:59 finished grinding
2			M-13-NB-V-T2	M	13	NB	R	2	1.8091	2.4703	2.4311	0.0392	31.9338	31.9422	0.0081	0.0473	0.171247		had 20 min to spare after setup
3			M-74-B-V-T2	M	74	B	R	2	1.7962	2.4653	2.4292	0.0361	27.5423	27.5527	0.0101	0.0462	0.218615		11:50 start on 1
4			M-73-NB-V-T2	M	73	NB	S	2	1.7996	2.1569	2.1354	0.0215	37.486	37.4918	0.0055	0.027	0.203704		12:26 finish
5			M-73-I-V	M	73	na	S	1	1.7929	2.2102	2.1856	0.0246	38.4196	38.4283	0.00845	0.03305	0.255673		1:09 last separation bf Eflasks
6			M-21-NB-V-T2	M	21	NB	R	2	1.7749	2.2903	2.2615	0.0288	35.1092	35.1175	0.008	0.0368	0.217391		Drying down started at 2 pm 1750 psi
7			M-66-I-V	M	66	na	R	1	1.7608	2.2956	2.2573	0.0383	34.9747	34.9861	0.0111	0.0494	0.224696		Oven on at 2:22 pm
8			M-13-I-V	M	13	na	R	1	1.7621	2.2388	2.2157	0.0231	35.9702	35.9753	0.0048	0.0279	0.172043		Ending 1550 psi
9			M-5-NB-V-T2	M	5	NB	S	2	1.829	2.1334	2.1139	0.0195	39.003	39.0083	0.005	0.0245	0.204082		Finished 3:50
10	2020-08-22	10:38:00	M-26-I-V	M	26	na	R	1	1.7562	2.8379	2.7888	0.0491	40.0672	40.0846	0.01705	0.06615	0.257748
11	2020-08-23	09:09:00	BLANK	Blank	Blank	Blank	Blank	Blank	1.7452	1.7453	1.7452	0.0001	28.2699	28.2708	0.0009				Start grinding at 9:24; ended 9:42
12			M-25-NB-V-T2	M	25	NB	S	2	1.7977	2.232	2.2062	0.0257	38.4919	38.4988	0.006	0.0317	0.189274		10:30 start on 1
13			M-20-B-V-T2	M	20	B	S	2	1.7313	2.0862	2.0751	0.011	34.5842	34.5875	0.00235	0.01335	0.17603		11:01 finish
14			M-26-NB-V-T2	M	26	NB	R	2	1.8563	2.1143	2.0977	0.0165	38.5476	38.5542	0.0057	0.0222	0.256757		11:48 last separation bf flasks
15			M-20-I-V	M	20	na	S	1	1.7814	2.1754	2.1525	0.0228	36.0504	36.0565	0.0052	0.028	0.185714		Drying down started at 12:20 pm 1550 psi
16			M-28-I-V	M	28	na	S	1	1.7836	2.5174	2.4758	0.0415	38.5527	38.5626	0.009	0.0505	0.178218		Oven on at 12:37 pm
17			M-74-I-V	M	74	na	R	1	1.7533	2.1496	2.124	0.0255	38.6874	38.6972	0.0089	0.0344	0.258721		Most finished by 2 pm, 1 slower
18			M-73-B-V-T2	M	73	B	S	2	1.7625	2.665	2.6285	0.0364	31.1741	31.1785	0.0035	0.0399	0.0877193		Finished 2:22
19			M-10-I-V	M	10	na	R	1	1.7736	2.2455	2.2218	0.0236	32.7338	32.7395	0.0048	0.0284	0.169014		Ending 1300 psi
20	2020-08-23	09:20:00	M-10-NB-V-T2	M	10	NB	R	2	1.7843	2.3029	2.2733	0.0295	35.4277	35.4348	0.0062	0.0357	0.173669		Finished 2:36
21	2020-08-25	08:22:00	BLANK	Blank	Blank	B	Blank	Blank	1.7816	1.7812	1.7812	0	27.5422	27.5421	-0.0001				Start grinding at 8:38; ended at 8:55
22			M-28-NB-V-T2	M	28	NB	S	2	1.8313	2.1074	2.0901	0.0173	31.9338	31.9377	0.004	0.0213	0.187793		9:38 start on 1
23			M-5-B-V-T2	M	5	B	S	2	1.8293	2.1704	2.1594	0.011	39.0031	39.0035	0.0005	0.0115	0.0434783		10:05 finish
24			M-10-B-V-T2	M	10	B	R	2	1.8105	2.1334	2.1186	0.0148	38.4196	38.4219	0.0024	0.0172	0.139535		11:02 finish (slow bc of STG)
25			M-26-B-V-T2	M	26	B	R	2	1.7834	2.2386	2.2185	0.0201	34.9746	34.978	0.0035	0.0236	0.148305		Drying down started at 11:26 am 1300 psi
26			M-5-I-V	M	5	na	S	1	1.8281	2.1499	2.1317	0.0182	37.486	37.4898	0.0039	0.0221	0.176471		Oven on at 11:47 am
27			M-55-I-V	M	55	na	S	1	1.8056	2.4397	2.4069	0.0328	40.0672	40.0734	0.0063	0.0391	0.161125		Most finished by 1 pm, 1 slower
28			M-25-I-V	M	25	na	S	1	1.7614	2.1624	2.1401	0.0223	35.9703	35.9752	0.005	0.0273	0.18315		Finished 2:25
29		fil alg?	M-25-B-V-T2	M	25	B	S	2	1.8142	2.2243	2.2114	0.0129	31.3977	31.3986	0.001	0.0139	0.0719424		Ending 950 psi
30		fil alg? 8:31	M-28-B-V-T2	M	28	B	S	2	1.7758	2.176	2.1632	0.0128	35.1093	35.11	0.0008	0.0136	0.0588235
31	2020-08-26	08:43:00	BLANK	Blank	Blank	Blank	Blank	Blank	1.8	1.7998	1.7999	-0.0001	38.6877	38.6877	0				Start grinding at 8:57; ended at 9:14
32			M-55-NB-V-T2	M	55	NB	S	2	1.7946	2.145	2.1279	0.0172	31.1743	31.1777	0.0034	0.0206	0.165049		10 am start on 1
33			M-13-B-V-T2	M	13	B	R	2	1.806	2.1617	2.1428	0.019	32.7343	32.7397	0.0054	0.0244	0.221311		10:27 finish
34			M-20-NB-V-T2	M	20	NB	S	2	1.7944	2.1766	2.158	0.0187	38.4922	38.4961	0.0039	0.0226	0.172566		Drying down started at 11:31 am, 900 psi
35			M-21-B-V-T2	M	21	B	R	2	1.8058	2.211	2.1868	0.0243	34.5843	34.5901	0.0058	0.0301	0.192691		Oven on at 11:48 am
36			M-21-I-V	M	21	na	R	1	1.7753	1.9627	1.9505	0.0123	38.5532	38.5571	0.0039	0.0162	0.240741		Finished at <1:48
37			M-55-B-V-T2	M	55	B	S	2	1.8065	2.2033	2.1912	0.0122	35.428	35.43	0.002	0.0142	0.140845
38			M-66-B-V-T2	M	66	B	R	2	1.7867	1.9881	1.9746	0.0136	36.0504	36.0537	0.0033	0.0169	0.195266		Oven on at 9:24 am - 3:24 pm
39			M-74-NB-V-T2	M	74	NB	R	2	1.8209	2.11745	2.099	0.01855	28.2698	28.2757	0.0059	0.02445	0.241309
40	2020-08-26	08:51:00	M-66-NB-V-T2	M	66	NB	R	2	1.8171	2.0578	2.0416	0.0163	38.5474	38.5519	0.0045	0.0208	0.216346
	resilient and susceptible
Lipid analyses processed by L. Rodrigues
Tab Notes:
"Lab Analyses"			Numbers in Column A for identification during analysis only.
"Lipid_Biomass (g_gdw)"			Lipid/Biomass (g/gdw)
			All values for total lipids for each colony, standardized to total gram dry weight of living tissue or biomass
			na = not applicable
			nd = no data
			one colony (#32) add because we had a fragment for time 4 when sample size was low

## Sheet: E_Lipid_Biomass (g_gdw)
COLONY_ID	Tolerance	T1	T2- Bleached	T2- Non-Bleached
10	R	0.169014	0.139535	0.173669
13	R	0.172043	0.221311	0.171247
21	R	0.240741	0.192691	0.217391
26	R	0.257748	0.148305	0.256757
66	R	0.224696	0.195266	0.216346
74	R	0.258721	0.218615	0.241309
5	S	0.176471	0.0434783	0.204082
20	S	0.185714	0.17603	0.172566
25	S	0.18315	0.0719424	0.189274
28	S	0.178218	0.0588235	0.187793
55	S	0.161125	0.140845	0.165049
73	S	0.255673	0.0877193	0.203704
32	NA	nd	nd	nd
