# Supplementary material for: Resilience in a time of stress: revealing the molecular underpinnings of coral survival following thermal bleaching events
Source: Research Square preprint supplement (doi:10.21203/rs.3.rs-4566379/v1), 2024-07-03
Supplement: Supplementary file 3 [file 732e0d6fdf6af0baacbb896f.xlsx]

## Sheet: README
TAB	DESCRIPTION
A_T1 R vs S metaGOmics	metaGOmics output file resulting from analysis of resilient vs susceptible coral colony proteomes at Timepoint 1; Run1 represents data from resilient cohort at T1 and Run2 represents data from susceptible cohorts at T1
B_T2 R vs S metaGOmics	metaGOmics output file resulting from analysis of resilient vs susceptible coral colony proteomes at Timepoint 2; Run1 represents data from resilient cohort at T2 and Run2 represents data from susceptible cohorts at T2

## Sheet: A_T1 R vs S metaGOmics
GO acc	GO aspect	GO name	Run 1 ratio	Run 1 PSM count	Run 2 ratio	Run 2 PSM count	Log(2) fold change	Raw p-value	Bonf. corr. p-value	Laplace corr. Run 1 ratio	Laplace corr. Run 2 ratio	Laplace corr. Log(2) fold change	Laplace corr. Raw p-value	Laplace corr. Bonf. corr p-value	Laplace corr. q-value	Run 1 peptides	Run 2 peptides	Run 1 proteins	Run 2 proteins	Run 1 blast hits	Run 2 blast hits
GO:2001301	biological_process	lipoxin biosynthetic process	0.000168	14	9.78e-05	8	-0.777134	0.219	1	0.000162	9.88e-05	-0.709816	0.238	1	0.803	IATWEVTDFR,NYLSPIALFASVK,DLVDIVAR	TDDSLEDAIKK,GLDDKELLPYFPY,NYLSPIALFASVK,DVTIPNSVGTPALIDEGNYMDQLFAFGSK,DLVDIVAR	lcl|c227289_g1_i2|m.12315,lcl|c240333_g1_i3|m.27087,lcl|c240333_g1_i1|m.27086	lcl|c227289_g1_i2|m.12315,lcl|c240333_g1_i3|m.27087,lcl|c240333_g1_i1|m.27086	P09917	P09917
GO:2001300	biological_process	lipoxin metabolic process	0.000168	14	9.78e-05	8	-0.777134	0.219	1	0.000162	9.88e-05	-0.709816	0.238	1	0.803	IATWEVTDFR,NYLSPIALFASVK,DLVDIVAR	TDDSLEDAIKK,GLDDKELLPYFPY,NYLSPIALFASVK,DVTIPNSVGTPALIDEGNYMDQLFAFGSK,DLVDIVAR	lcl|c227289_g1_i2|m.12315,lcl|c240333_g1_i3|m.27087,lcl|c240333_g1_i1|m.27086	lcl|c227289_g1_i2|m.12315,lcl|c240333_g1_i3|m.27087,lcl|c240333_g1_i1|m.27086	P09917	P09917
GO:2001184	biological_process	positive regulation of interleukin-12 secretion	0.00012	10	0.000147	12	0.293255	0.634	1	0.000118	0.000143	0.268158	0.65	1	0.916	LTAEQALAHPY,TLFPGNDHIDQLT,TVWEVPNR,ILDFGLAR	LTAEQALAHPY,MAEEEMTGYVATR,MLDLDSDNR,TVWEVPNR,ILDFGLAR	lcl|c221440_g2_i5|m.7632,lcl|c221440_g2_i2|m.7631,lcl|c224463_g4_i7|m.9834,lcl|c224463_g4_i2|m.9831	lcl|c221440_g2_i5|m.7632,lcl|c221440_g2_i2|m.7631,lcl|c224463_g4_i7|m.9834,lcl|c224463_g4_i2|m.9831	P70618,Q9GM70,P47812,P47811	P70618,Q9GM70,P47812,P47811
GO:2001182	biological_process	regulation of interleukin-12 secretion	0.00012	10	0.000147	12	0.293255	0.634	1	0.000118	0.000143	0.268158	0.65	1	0.916	LTAEQALAHPY,TLFPGNDHIDQLT,TVWEVPNR,ILDFGLAR	LTAEQALAHPY,MAEEEMTGYVATR,MLDLDSDNR,TVWEVPNR,ILDFGLAR	lcl|c221440_g2_i5|m.7632,lcl|c221440_g2_i2|m.7631,lcl|c224463_g4_i7|m.9834,lcl|c224463_g4_i2|m.9831	lcl|c221440_g2_i5|m.7632,lcl|c221440_g2_i2|m.7631,lcl|c224463_g4_i7|m.9834,lcl|c224463_g4_i2|m.9831	P70618,Q9GM70,P47812,P47811	P70618,Q9GM70,P47812,P47811
GO:2001171	biological_process	positive regulation of ATP biosynthetic process	0.00682602	570	0.00732516	599	0.101815	0.226	1	0.00614964	0.00658472	0.0986215	0.241	1	0.804	EMVELPLR,IMLDLDGTENK,STSIPSSGQK,LAGESESNLR,MGAEVYQNLKK,MGAEVYQNLK,YGIDATNVGDEGGFAPNIQDNREGLELLK,LLVEEAINDDNSVVSMSQAK,GILLYGPPGTGK,YDLDFK,ACNCLLLK,NSPAIIFIDEIDAIAPK,IHVLPIDDTVEGLTGNL,GLLPQLVGVAPEK,YGIDATNVGDEGGFAPNIQDN,SDASLVSPVAPGSGAPTPQR,IGMDVAASEFYK,EGLELLK,HIADLAGNADVILPVPA,AFEEAEK,WITGDQLSDMYQEF,LGDDVDLEQIAAETHG,YMTPENLIR,AAVPSGASTGIYEALELR,KAFEEAEK,YGIDATNVGDEGGFAPNIQDNR,IVSQLLTLMDGLK,EVDIGI…	STSIPSSGQK,EVDIGIPDATGRLEI,LAGESESNLR,MGAEVYQNLKK,ACNCLLLK,IHVLPIDDTVEGLTGNL,GLLPQLVGVAPEK,SDASLVSPVAPGSGAPTPQR,WITGDQLSDMYQEF,LGDDVDLEQIAAETHG,YMTPENLIR,KAFEEAEK,EVDIGIPDATGR,IVSQLLTLMDGLK,YDLDFKNPQSDPAK,GNPTVEVDITTSK,VAIENAGYTGK,IIGPALISK,DIKPENL,IHVLPIDDTVEGLTGNLF,IVFQLFDLDGK,QGDVDKIMLDLDGTENK,LAMQEFMLLPTGASSFK,IEEELGDNAK,LLVEEAINDDNSVV,EGQQTYR,LGANAILGVSLAVCK,MEELQLFR,EMVELPLR,IMLDLDGTENK,HIA…	lcl|c236234_g4_i6|m.21880,lcl|c229538_g7_i4|m.14373,lcl|c235754_g3_i10|m.21302,lcl|c236234_g4_i1|m.21876,lcl|c235754_g3_i1|m.21301,lcl|c229532_g3_i4|m.14360,lcl|c234626_g4_i3|m.20042,lcl|c236234_g4_i13|m.21879,lcl|c239908_g1_i5|m.26518,lcl|c236234_g4_i10|m.21877	lcl|c234064_g1_i4|m.19396,lcl|c236234_g4_i6|m.21880,lcl|c210586_g1_i2|m.2213,lcl|c229538_g7_i4|m.14373,lcl|c234064_g1_i2|m.19394,lcl|c236234_g4_i1|m.21876,lcl|c210586_g1_i1|m.2212,lcl|c239574_g1_i2|m.26000,lcl|c210586_g1_i4|m.2214,lcl|c242662_g1_i1|m.30100,lcl|c229547_g1_i1|m.14385,lcl|c221676_g4_i8|m.7788,lcl|c239908_g1_i5|m.26518,lcl|c226454_g2_i17|m.11487,lcl|c234064_g1_i1|m.19391,lcl|c241464_…	Q9SCN8,P06733,P54774,O75746,Q5R658,P25694,Q7KN62,Q793F9,P15007,P54812,P54811,P33676,Q27877,Q96372,A0JMA9,P23787,Q9UJS0,P46467,P55072,Q8BH59,P04764,P19140,P46462,Q9W7L0,Q9W7L1,O74286,P51913,Q9W7L2,O02654,P42897,Q0VD48,Q3ZBT1,Q27527,Q9LZF6,P56252,P07323,P07322,P42894,Q8HXW2,P09104,Q5AWS6,P13929,Q5RBC8,Q9P3A7,P08734,Q1KYT0,Q3ZC09,Q9UN37,Q7ZU99,P15429,Q9QXX4,I0J1J1,Q8VEJ9,Q27655,Q9PVK2,P25704,B5DGQ7,…	P25694,Q15418,Q7KN62,Q793F9,P15007,Q09137,Q5RCC4,Q27877,Q96372,Q9DB30,Q9UJS0,P23787,A5GFW1,P49138,Q923T9,P04764,Q3MHJ9,P11730,O74286,P51913,Q9JLM8,P18652,P18653,P18654,P13234,Q0VD48,Q27527,P56252,O61661,Q8HXW2,P0C605,Q9WUT3,Q1KYT0,Q9UN37,Q8BRK8,I0J1J1,Q66JF3,Q95266,Q27655,Q9PVK2,P25704,O77708,Q0V7M1,P51812,O57391,Q5R6Y1,P11798,O75351,P11275,P54646,Q01853,Q4R5L2,Q6GL04,P06733,Q9SCN8,O75746,P54774,…
GO:2001170	biological_process	negative regulation of ATP biosynthetic process	0.0056644	473	0.00431683	353	-0.391951	0.000103	0.959	0.00510495	0.00388499	-0.393988	9.29e-05	0.868	0.00502	GILETNFNTLQTK,MISDINR,ILAGDKPYITVEELR,SIALTMEGPLEDQLK,LEPLEFQQCLVSLGYDVK,LAVLQDVDSLLLEFAK,VSWEQLLTAIAR,MASDLLDWISK,GLLDAAWER,MDELELVHQDVQEAM,ANVVGEWIK,FAIQDINIEESAAK,DGLLLWCQR,LDHLAEK,IMAIVDPNGTGYVTF,ALQFVYSK,LAVLQDVDSLLL,DSDGTLNDIQNKLDALR,ILAGDKPYITVEE,NINEIENQILT,VDSINER,LGNRPAYLPT,ILAGDKPYITVEEL,DDPLGNLNLAF,DSDGTLNDIQNK,AAPYNNWLESAR,MMEEYEK,NINEIENQILTR,MAPYEGPDAVPGALDY,AAQELER,GLTEEQMK,DDLENA…	GILETNFNTLQTK,MISDINR,ILAGDKPYITVEELR,SIALTMEGPLEDQLK,LEPLEFQQCLVSLGYDVK,VSWEQLLTAIAR,DSDGTLNDIQNKLDAL,DDPLGNLNLAFEVADK,MASDLLDWISK,GLLDAAWER,LAVLQDVDSLLLE,MDELELVHQDVQEAM,ANVVGEWIK,FAIQDINIEESAAK,LDHLAEK,IMAIVDPNGTGYVTF,ALQFVYSK,DFEDWLLK,LAVLQDVDSLLL,DSDGTLNDIQNKLDALR,ILAGDKPYITVEE,NINEIENQILT,VDSINER,LGNRPAYLPT,MLPWLQDRDSDGTLNDIQNK,ILAGDKPYITVEEL,DSDGTLNDIQNK,AAPYNNWLESAR,NINEIENQILTR,AAQELER,G…	lcl|c234934_g3_i3|m.20432,lcl|c243788_g1_i5|m.31318	lcl|c234934_g3_i3|m.20432,lcl|c244084_g2_i1|m.31725,lcl|c243788_g1_i5|m.31318	Q7PKQ5,A5D7D1,P18091,Q08043,Q9JI91,Q7TPR4,Q90734,Q9Z1P2,Q8NF91,P35609,Q2PFV7,P12814,Q9QXQ0,Q0III9,Q5RCS6,L7UZ85,O43707,P57780,P05094,P20111,Q3ZC55,Q3B7N2,O88990	Q7PKQ5,A5D7D1,P18091,Q08043,Q9JI91,Q7TPR4,Q90734,Q9Z1P2,Q8NF91,P49288,P35609,Q2PFV7,P12814,Q9QXQ0,Q0III9,Q5RCS6,L7UZ85,O43707,P57780,P05094,P20111,Q3ZC55,Q3B7N2,O88990
GO:2001169	biological_process	regulation of ATP biosynthetic process	0.0130533	1090	0.0120945	989	-0.110065	0.0803	1	0.01175	0.0108648	-0.113001	0.0726	1	0.451	AEFQEQSSK,STSIPSSGQK,LAGESESNLR,TELTSQSK,YDLDFK,NSPAIIFIDEIDAIAPK,IHVLPIDDTVEGLTGNL,TQSEVDSQTAAQHAEIMEK,GLLPQLVGVAPEK,MDELELVHQDVQEAM,FAIQDINIEESAAK,YGIDATNVGDEGGFAPNIQDN,SDASLVSPVAPGSGAPTPQR,FVTGGCDNLVK,YMTPENLIR,IMAIVDPNGTGYVTF,ALQFVYSK,IVSQLLTLMDGLK,YDLDFKNPQSDPAK,GNPTVEVDITTSK,SIEEMQQQNQK,IIGPALISK,SAELQTVPNTEK,QADPSQLTIIFNK,ISYGYYR,LAMQEFMLLPTGASSFK,MDLIDLEDEQIDAEVLDSLA,IEEELGDNAK,AWGNLEASEK…	STSIPSSGQK,LAGESESNLR,DDPLGNLNLAFEVADK,IHVLPIDDTVEGLTGNL,GLLPQLVGVAPEK,MDELELVHQDVQEAM,FAIQDINIEESAAK,SDASLVSPVAPGSGAPTPQR,FVTGGCDNLVK,YMTPENLIR,IMAIVDPNGTGYVTF,ALQFVYSK,IVSQLLTLMDGLK,YDLDFKNPQSDPAK,GNPTVEVDITTSK,SIEEMQQQNQK,IIGPALISK,DIKPENL,IHVLPIDDTVEGLTGNLF,IVFQLFDLDGK,LAMQEFMLLPTGASSFK,IEEELGDNAK,AWGNLEASEK,GKVDDSETANETELN,MLDAEEMVNMAKPDER,LAVLQDVDSLL,EGQQTYR,LGANAILGVSLAVCK,MLPWLQDR,MEELQLF…	lcl|c236234_g4_i6|m.21880,lcl|c229538_g7_i4|m.14373,lcl|c236234_g4_i1|m.21876,lcl|c238692_g2_i2|m.24838,lcl|c239908_g1_i5|m.26518,lcl|c231326_g2_i7|m.16131,lcl|c231326_g2_i1|m.16129,lcl|c243788_g1_i5|m.31318,lcl|c236234_g4_i10|m.21877,lcl|c222200_g1_i1|m.8165,lcl|c234934_g3_i3|m.20432,lcl|c235754_g3_i10|m.21302,lcl|c235754_g3_i1|m.21301,lcl|c236234_g4_i13|m.21879,lcl|c229532_g3_i4|m.14360,lcl|c23…	lcl|c234064_g1_i4|m.19396,lcl|c236234_g4_i6|m.21880,lcl|c229538_g7_i4|m.14373,lcl|c234064_g1_i2|m.19394,lcl|c242662_g1_i1|m.30100,lcl|c221676_g4_i8|m.7788,lcl|c231326_g2_i7|m.16131,lcl|c231326_g2_i1|m.16129,lcl|c225854_g1_i4|m.10994,lcl|c221676_g4_i4|m.7786,lcl|c224773_g5_i3|m.10121,lcl|c236234_g4_i13|m.21879,lcl|c241242_g1_i1|m.28345,lcl|c217583_g2_i1|m.5267,lcl|c227927_g4_i1|m.12894,lcl|c237286…	Q08043,P25694,Q7KN62,P12814,Q9WUR9,Q793F9,P15007,P35658,F6ZDS4,Q27877,Q96372,P23787,Q9UJS0,Q7PKQ5,P18091,P04764,Q8NF91,O74286,P51913,Q0VD48,Q27527,P12270,P56252,Q8HXW2,Q1KYT0,Q9UN37,Q9UIJ7,I0J1J1,Q0III9,Q27655,Q9PVK2,P25704,O57391,Q5R6Y1,O75351,P55735,Q01853,Q5RCS6,O43707,Q4R5L2,Q6GL04,Q9SCN8,P06733,P54774,Q5R658,O75746,Q2PFV7,P54812,P54811,P33676,L7UZ85,P05094,F1MA98,A0JMA9,P20111,P46467,P55072,…	Q08043,P25694,Q15418,Q7KN62,P12814,Q793F9,Q9WUR9,P15007,Q09137,P35658,F6ZDS4,Q5RCC4,Q27877,Q96372,Q9DB30,Q9UJS0,P23787,A5GFW1,P49138,Q923T9,Q7PKQ5,P04764,P18091,Q8NF91,Q3MHJ9,P11730,O74286,P51913,Q9JLM8,P18652,P18653,P18654,P13234,Q0VD48,Q27527,P12270,P56252,O61661,Q8HXW2,P0C605,Q9WUT3,Q1KYT0,Q9UN37,Q8BRK8,Q9UIJ7,I0J1J1,Q66JF3,Q0III9,Q95266,Q27655,Q9PVK2,P25704,O77708,Q0V7M1,P51812,O57391,Q5R6Y1,…
GO:2001168	biological_process	positive regulation of histone H2B ubiquitination	0.00156879	131	0.00166314	136	0.0842606	0.633	1	0.00142163	0.00150351	0.0807877	0.646	1	0.914	EMVELPLR,IADFGLAR,LAGESESNLR,LLVEEAINDDNSVVSMSQAK,GILLYGPPGTGK,FDREVDIGIPDATGR,LGDIVSVQACPDVK,MDLIDLEDEQIDAEVLDSLA,NSPAIIFIDEIDAIAPK,IHVLPIDDTVEGLTGNL,EVDIGIPDATGRLEILR,LLVEEAINDDNSVV,AFEEAEK,LGDDVDLEQIAAETHGY,LGDDVDLEQIAAETHG,KAFEEAEK,IVSQLLTLMDGLK,EVDIGIPDATGR,MEELQLFR	EMVELPLR,IADFGLAR,EVDIGIPDATGRLEI,LAGESESNLR,IHVLPIDDTVEGLTGN,LLVEEAINDDNSVVSMSQAK,GILLYGPPGTGK,FDREVDIGIPDATGR,IHVLPIDDTVEGLTGNLF,LGDIVSVQACPDVK,IHVLPIDDTVEGLTGNL,FDREVDIGIPDATG,EVDIGIPDATGRLEIL,LLVEEAINDDNSVV,AFEEAEK,LGDDVDLEQIAAETHGY,LGDDVDLEQIAAETHG,KAFEEAEK,IVSQLLTLMDGLK,EVDIGIPDATGR,MEELQLFR	lcl|c226782_g6_i6|m.11785,lcl|c235052_g1_i3|m.20523,lcl|c229538_g7_i4|m.14373,lcl|c221061_g4_i1|m.7355,lcl|c235052_g1_i4|m.20524,lcl|c226176_g1_i2|m.11271,lcl|c221061_g4_i2|m.7358,lcl|c235052_g1_i6|m.20525,lcl|c232719_g2_i1|m.17712,lcl|c226782_g6_i4|m.11783,lcl|c213237_g2_i2|m.2995,lcl|c226782_g6_i5|m.11784,lcl|c221431_g3_i2|m.7619,lcl|c233141_g1_i1|m.18196,lcl|c213203_g1_i1|m.2991,lcl|c234378_g4…	lcl|c226782_g6_i6|m.11785,lcl|c235052_g1_i3|m.20523,lcl|c229538_g7_i4|m.14373,lcl|c221061_g4_i1|m.7355,lcl|c235052_g1_i4|m.20524,lcl|c226176_g1_i2|m.11271,lcl|c221061_g4_i2|m.7358,lcl|c235052_g1_i6|m.20525,lcl|c232719_g2_i1|m.17712,lcl|c226782_g6_i4|m.11783,lcl|c213237_g2_i2|m.2995,lcl|c226782_g6_i5|m.11784,lcl|c221431_g3_i2|m.7619,lcl|c233141_g1_i1|m.18196,lcl|c213203_g1_i1|m.2991,lcl|c234378_g4…	Q61851,Q9SCN8,Q9P3A7,P54774,Q5R658,P25694,O64771,Q9UN37,P18460,Q7KN62,Q7ZU99,Q793F9,P54812,Q3UMM4,P54811,Q8VEJ9,Q00535,Q5ZKN1,Q96372,Q00534,P43450,Q8N165,A0JMA9,Q6NU47,O22042,P23787,P46467,P55072,P20794,P03974,Q7T6X2,A8WIP6,P46462,O75351,Q01853,Q0VD48,P22607,Q3ZBT1,P54609,Q6FN53,Q9LZF6,P08630,P27636,Q6GL04,Q6P3Q4,Q5AWS6	Q61851,Q9SCN8,Q9P3A7,P54774,Q5R658,P25694,O64771,Q9UN37,P18460,Q7KN62,Q7ZU99,Q793F9,P54812,Q3UMM4,P54811,Q8VEJ9,Q00535,Q5ZKN1,Q96372,Q00534,P43450,Q8N165,A0JMA9,Q6NU47,O22042,P23787,P46467,P55072,P20794,P03974,Q7T6X2,A8WIP6,P46462,O75351,Q01853,Q0VD48,P22607,Q3ZBT1,P54609,Q6FN53,Q9LZF6,P08630,P27636,Q6GL04,Q6P3Q4,Q5AWS6
GO:2001166	biological_process	regulation of histone H2B ubiquitination	0.00156879	131	0.00166314	136	0.0842606	0.633	1	0.00142163	0.00150351	0.0807877	0.646	1	0.914	EMVELPLR,IADFGLAR,LAGESESNLR,LLVEEAINDDNSVVSMSQAK,GILLYGPPGTGK,FDREVDIGIPDATGR,LGDIVSVQACPDVK,MDLIDLEDEQIDAEVLDSLA,NSPAIIFIDEIDAIAPK,IHVLPIDDTVEGLTGNL,EVDIGIPDATGRLEILR,LLVEEAINDDNSVV,AFEEAEK,LGDDVDLEQIAAETHGY,LGDDVDLEQIAAETHG,KAFEEAEK,IVSQLLTLMDGLK,EVDIGIPDATGR,MEELQLFR	EMVELPLR,IADFGLAR,EVDIGIPDATGRLEI,LAGESESNLR,IHVLPIDDTVEGLTGN,LLVEEAINDDNSVVSMSQAK,GILLYGPPGTGK,FDREVDIGIPDATGR,IHVLPIDDTVEGLTGNLF,LGDIVSVQACPDVK,IHVLPIDDTVEGLTGNL,FDREVDIGIPDATG,EVDIGIPDATGRLEIL,LLVEEAINDDNSVV,AFEEAEK,LGDDVDLEQIAAETHGY,LGDDVDLEQIAAETHG,KAFEEAEK,IVSQLLTLMDGLK,EVDIGIPDATGR,MEELQLFR	lcl|c226782_g6_i6|m.11785,lcl|c235052_g1_i3|m.20523,lcl|c229538_g7_i4|m.14373,lcl|c221061_g4_i1|m.7355,lcl|c235052_g1_i4|m.20524,lcl|c226176_g1_i2|m.11271,lcl|c221061_g4_i2|m.7358,lcl|c235052_g1_i6|m.20525,lcl|c232719_g2_i1|m.17712,lcl|c226782_g6_i4|m.11783,lcl|c213237_g2_i2|m.2995,lcl|c226782_g6_i5|m.11784,lcl|c221431_g3_i2|m.7619,lcl|c233141_g1_i1|m.18196,lcl|c213203_g1_i1|m.2991,lcl|c234378_g4…	lcl|c226782_g6_i6|m.11785,lcl|c235052_g1_i3|m.20523,lcl|c229538_g7_i4|m.14373,lcl|c221061_g4_i1|m.7355,lcl|c235052_g1_i4|m.20524,lcl|c226176_g1_i2|m.11271,lcl|c221061_g4_i2|m.7358,lcl|c235052_g1_i6|m.20525,lcl|c232719_g2_i1|m.17712,lcl|c226782_g6_i4|m.11783,lcl|c213237_g2_i2|m.2995,lcl|c226782_g6_i5|m.11784,lcl|c221431_g3_i2|m.7619,lcl|c233141_g1_i1|m.18196,lcl|c213203_g1_i1|m.2991,lcl|c234378_g4…	Q61851,Q9SCN8,Q9P3A7,P54774,Q5R658,P25694,O64771,Q9UN37,P18460,Q7KN62,Q7ZU99,Q793F9,P54812,Q3UMM4,P54811,Q8VEJ9,Q00535,Q5ZKN1,Q96372,Q00534,P43450,Q8N165,A0JMA9,Q6NU47,O22042,P23787,P46467,P55072,P20794,P03974,Q7T6X2,A8WIP6,P46462,O75351,Q01853,Q0VD48,P22607,Q3ZBT1,P54609,Q6FN53,Q9LZF6,P08630,P27636,Q6GL04,Q6P3Q4,Q5AWS6	Q61851,Q9SCN8,Q9P3A7,P54774,Q5R658,P25694,O64771,Q9UN37,P18460,Q7KN62,Q7ZU99,Q793F9,P54812,Q3UMM4,P54811,Q8VEJ9,Q00535,Q5ZKN1,Q96372,Q00534,P43450,Q8N165,A0JMA9,Q6NU47,O22042,P23787,P46467,P55072,P20794,P03974,Q7T6X2,A8WIP6,P46462,O75351,Q01853,Q0VD48,P22607,Q3ZBT1,P54609,Q6FN53,Q9LZF6,P08630,P27636,Q6GL04,Q6P3Q4,Q5AWS6
GO:2001153	biological_process	positive regulation of renal water transport	0	0	2.45e-05	2	null	0.153	1	1.08e-05	3.29e-05	1.61211	0.308	1	0.844		VTQPPDEDFR		lcl|c233521_g3_i9|m.18678,lcl|c233521_g3_i3|m.18674		P59644,Q8C5L6
GO:2001151	biological_process	regulation of renal water transport	0	0	2.45e-05	2	null	0.153	1	1.08e-05	3.29e-05	1.61211	0.308	1	0.844		VTQPPDEDFR		lcl|c233521_g3_i9|m.18678,lcl|c233521_g3_i3|m.18674		P59644,Q8C5L6
GO:2001150	biological_process	positive regulation of dipeptide transmembrane transport	0.000204	17	0.000281	23	0.46632	0.31	1	0.000194	0.000263	0.442187	0.324	1	0.846	NVYDETAPLLGTVQSSNK,GLPPLSVPSFSWMSK,HGTGSNDEAM	SDNGELVESNK,NVYDETAPLLGTVQSSNK,GLPPLSVPSFSWMSK	lcl|c237792_g3_i2|m.23754,lcl|c226933_g1_i6|m.11949,lcl|c226933_g1_i4|m.11947	lcl|c226933_g1_i4|m.11948,lcl|c237792_g3_i2|m.23754,lcl|c226933_g1_i6|m.11949,lcl|c226933_g1_i4|m.11947	Q8CIW6,O70531	Q8CIW6,O70531
GO:2001148	biological_process	regulation of dipeptide transmembrane transport	0.000204	17	0.000281	23	0.46632	0.31	1	0.000194	0.000263	0.442187	0.324	1	0.846	NVYDETAPLLGTVQSSNK,GLPPLSVPSFSWMSK,HGTGSNDEAM	SDNGELVESNK,NVYDETAPLLGTVQSSNK,GLPPLSVPSFSWMSK	lcl|c237792_g3_i2|m.23754,lcl|c226933_g1_i6|m.11949,lcl|c226933_g1_i4|m.11947	lcl|c226933_g1_i4|m.11948,lcl|c237792_g3_i2|m.23754,lcl|c226933_g1_i6|m.11949,lcl|c226933_g1_i4|m.11947	Q8CIW6,O70531	Q8CIW6,O70531
GO:2001141	biological_process	regulation of RNA biosynthetic process	0.0726792	6069	0.0714906	5846	-0.0237883	0.35	1	0.0653736	0.0641681	-0.0268502	0.294	1	0.844	TGEDGDFLWPGFGENCR,YNPTEVGR,QTNTSQWEMPSDEAATKV,VQEEYIKDEQK,GNFDSLPVK,KVTESTSK,NKPTTQGDCSLETK,QVEHEEDEDGISDENLK,IGSSGAPVTDQSEETR,LMDEAMCSR,INEKPQVI,NAQSSSGGGSFNR,SEEDRITEAEKNER,FGIATSASSGDSTDAK,TLFPGNDHIDQLT,YGEYFPGTGDLR,GDQAMFQR,SLIFTETK,VEQLTAENNELK,IASESPEQTGICK,NYEAMEGEK,LAGPQLVQMFIGDGAK,MLDAEEMVNMAKPDER,VLNDVQDMK,YSSTEAR,LGQWMSVTEMNENLATR,VVTGQLQPNR,GVDEVLLSGQK,FEAPEALFQPHLI,GVTIASGGVLPNIHPEL,…	TGEDGDFLWPGFGENCR,KLIVLDPK,GNFDSLPVK,KVTESTSK,NKPTTQGDCSLETK,QVEHEEDEDGISDENLK,IGSSGAPVTDQSEETR,LMDEAMCSR,NAQSSSGGGSFNR,TVETTTGNENLQK,LGSSQADVGLALGELYGNVFSQ,VSEGLDFADNNAR,SEEDRITEAEKNER,FGIATSASSGDSTDAK,IFHVNWFR,YGEYFPGTGDLR,GDQAMFQR,IASESPEQTGICK,NYEAMEGEK,LAGPQLVQMFIGDGAK,MLDAEEMVNMAKPDER,TIRPDNMSEYTK,VLNDVQDMK,YSSTEAR,GLNVPLPSGYQPK,RLAELVK,HIADLAGNADVILPVPAF,LGQWMSVTEMNENLATR,VVTGQLQPNR,GVDEVL…	lcl|c242947_g1_i3|m.30437,lcl|c232931_g1_i9|m.17924,lcl|c202129_g1_i1|m.1242,lcl|c221676_g4_i8|m.7788,lcl|c232719_g2_i1|m.17712,lcl|c220164_g3_i1|m.6775,lcl|c239497_g2_i4|m.25880,lcl|c239246_g1_i11|m.25499,lcl|c220189_g1_i1|m.6796,lcl|c221676_g4_i4|m.7786,lcl|c235619_g2_i6|m.21140,lcl|c218494_g2_i5|m.5814,lcl|c228453_g2_i1|m.13340,lcl|c238859_g1_i3|m.25019,lcl|c217834_g1_i3|m.5399,lcl|c232931_g1_…	lcl|c242947_g1_i3|m.30437,lcl|c232931_g1_i9|m.17924,lcl|c202129_g1_i1|m.1242,lcl|c221676_g4_i8|m.7788,lcl|c232719_g2_i1|m.17712,lcl|c220164_g3_i1|m.6775,lcl|c239497_g2_i4|m.25880,lcl|c239246_g1_i11|m.25499,lcl|c220189_g1_i1|m.6796,lcl|c221676_g4_i4|m.7786,lcl|c223887_g1_i1|m.9457,lcl|c224773_g5_i3|m.10121,lcl|c235619_g2_i6|m.21140,lcl|c218494_g2_i5|m.5814,lcl|c228453_g2_i1|m.13340,lcl|c238859_g1_…	O93377,Q9Y265,Q9SAF5,A3KP59,Q7ZXV3,P15007,P54613,P54612,Q6PDG5,Q5R7D3,F6XBL2,Q9N1U2,Q9Z2U1,Q4P184,Q91WV0,P05696,Q54UW5,P98200,P98204,Q80W31,Q05046,P36179,P39688,Q5R9I6,Q6DRG7,E1BPK6,Q4QQT4,Q0IIJ2,P61158,P61157,Q9Z2V4,P10809,P54632,P30626,P49001,Q5R7A8,Q40079,Q40078,Q0III9,O60423,P61161,P61160,Q750R1,Q5ZMV3,Q5ZL33,Q4QQW4,P27446,P41753,Q3SWX8,Q08773,Q3SWY2,O60675,A6M931,O73723,Q9EQS3,P54814,Q80W83,…	O93377,Q9Y265,Q9SAF5,Q7ZXV3,P15007,P54613,P54612,Q6PDG5,Q5R7D3,F6XBL2,Q9N1U2,Q9DB30,Q9Z2U1,Q4P184,P05696,Q54UW5,P98200,P98204,Q69ZX6,Q05046,P36179,P39688,Q5R9I6,Q6DRG7,E1BPK6,Q4QQT4,Q0IIJ2,P61158,P61157,Q9Z2V4,P10809,P54632,P30626,P49001,O55081,Q5R7A8,Q40079,Q40078,Q0III9,O60423,P61161,P61160,Q750R1,Q5ZL33,Q4QQW4,P27446,P41753,Q9NZI7,Q3SWX8,Q08773,P54646,Q3SWY2,A6M931,Q8C5W4,P41743,O73723,Q9ZTS1,…
GO:2001140	biological_process	positive regulation of phospholipid transport	1.2e-05	1	2.45e-05	2	1.03022	0.551	1	2.15e-05	3.29e-05	0.612112	0.64	1	0.909	TSNLNEELGQVR	TSNLNEELGQVR	lcl|c234785_g1_i10|m.20251,lcl|c234785_g1_i5|m.20254	lcl|c234785_g1_i10|m.20251,lcl|c234785_g1_i5|m.20254	P98198,P98197,Q8TF62,P98199,Q9Y2Q0,Q9SAF5,P32660,Q9Y2G3,Q9XIE6,Q9SX33,O60423,P70704,P57792,Q9NTI2,Q12675,A3FIN4,Q9LK90,P98200,O43520,P98204,Q5BL50,Q9QZW0,C7EXK4,P39524,O94296,Q29449,Q8NB49,Q9LNQ4,Q9N0Z4,P98196,Q148W0,Q9U280,Q9LI83	P98198,P98197,Q8TF62,P98199,Q9Y2Q0,Q9SAF5,P32660,Q9Y2G3,Q9XIE6,Q9SX33,O60423,P70704,P57792,Q9NTI2,Q12675,A3FIN4,Q9LK90,P98200,O43520,P98204,Q5BL50,Q9QZW0,C7EXK4,P39524,O94296,Q29449,Q8NB49,Q9LNQ4,Q9N0Z4,P98196,Q148W0,Q9U280,Q9LI83
GO:2001138	biological_process	regulation of phospholipid transport	1.2e-05	1	2.45e-05	2	1.03022	0.551	1	2.15e-05	3.29e-05	0.612112	0.64	1	0.909	TSNLNEELGQVR	TSNLNEELGQVR	lcl|c234785_g1_i10|m.20251,lcl|c234785_g1_i5|m.20254	lcl|c234785_g1_i10|m.20251,lcl|c234785_g1_i5|m.20254	P98198,P98197,Q8TF62,P98199,Q9Y2Q0,Q9SAF5,P32660,Q9Y2G3,Q9XIE6,Q9SX33,O60423,P70704,P57792,Q9NTI2,Q12675,A3FIN4,Q9LK90,P98200,O43520,P98204,Q5BL50,Q9QZW0,C7EXK4,P39524,O94296,Q29449,Q8NB49,Q9LNQ4,Q9N0Z4,P98196,Q148W0,Q9U280,Q9LI83	P98198,P98197,Q8TF62,P98199,Q9Y2Q0,Q9SAF5,P32660,Q9Y2G3,Q9XIE6,Q9SX33,O60423,P70704,P57792,Q9NTI2,Q12675,A3FIN4,Q9LK90,P98200,O43520,P98204,Q5BL50,Q9QZW0,C7EXK4,P39524,O94296,Q29449,Q8NB49,Q9LNQ4,Q9N0Z4,P98196,Q148W0,Q9U280,Q9LI83
GO:2001137	biological_process	positive regulation of endocytic recycling	0.00577218	482	0.00445135	364	-0.374874	0.000168	1	0.00520188	0.00400571	-0.376977	0.000152	1	0.00679	GILETNFNTLQTK,MISDINR,ILAGDKPYITVEELR,SIALTMEGPLEDQLK,LEPLEFQQCLVSLGYDVK,LAVLQDVDSLLLEFAK,VSWEQLLTAIAR,MASDLLDWISK,GLLDAAWER,ADMVTTQQLMR,SLSSFGNAFLNR,MDELELVHQDVQEAM,ANVVGEWIK,FAIQDINIEESAAK,DGLLLWCQR,LDHLAEK,IMAIVDPNGTGYVTF,ALQFVYSK,LAVLQDVDSLLL,DSDGTLNDIQNKLDALR,ILAGDKPYITVEE,NINEIENQILT,VINTPEVAR,VDSINER,LGNRPAYLPT,ILAGDKPYITVEEL,DDPLGNLNLAF,DSDGTLNDIQNK,AAPYNNWLESAR,MMEEYEK,NINEIENQILTR,MAPYE…	GILETNFNTLQTK,ILAGDKPYITVEELR,LEPLEFQQCLVSLGYDVK,DDPLGNLNLAFEVADK,MASDLLDWISK,ADMVTTQQLMR,SLSSFGNAFLNR,MDELELVHQDVQEAM,ANVVGEWIK,FAIQDINIEESAAK,IMAIVDPNGTGYVTF,ALQFVYSK,DSDGTLNDIQNKLDALR,ILAGDKPYITVEE,MLPWLQDRDSDGTLNDIQNK,IWTLSDIDRDGQLDEEEF,ILAGDKPYITVEEL,LDISDEFQR,AAQELER,AWGNLEASEK,MLDAEEMVNMAKPDER,LAVLQDVDSLL,MLANDIPR,CQYICDEWAK,VLTINKDNEK,LGNRPAYLPTEGK,MLPWLQDR,NPQVFNSVVDGLR,MISDINR,SIALTMEGP…	lcl|c234934_g3_i3|m.20432,lcl|c239887_g1_i1|m.26471,lcl|c243788_g1_i5|m.31318	lcl|c234934_g3_i3|m.20432,lcl|c239887_g1_i1|m.26471,lcl|c243788_g1_i5|m.31318	A5D7D1,Q08043,Q7TPR4,Q90734,Q9Z1P2,Q2PFV7,P12814,Q9H223,Q0III9,Q5RBP4,L7UZ85,P05094,Q641Z6,P20111,O88990,Q7PKQ5,P18091,Q9JI91,Q8NF91,P35609,Q8BH64,Q4V8H8,Q9EQP2,Q9QXY6,Q9QXQ0,Q5RCS6,Q8R491,O43707,Q9WVK4,P57780,Q9NZN3,Q5E9R3,Q9NZN4,Q3ZC55,Q9H4M9,Q3B7N2	A5D7D1,Q08043,Q7TPR4,Q90734,Q9Z1P2,Q2PFV7,P12814,Q9H223,Q0III9,Q5RBP4,L7UZ85,P05094,Q641Z6,P20111,O88990,Q7PKQ5,P18091,Q9JI91,Q8NF91,P35609,Q8BH64,Q4V8H8,Q9EQP2,Q9QXY6,Q9QXQ0,Q5RCS6,Q8R491,O43707,Q9WVK4,P57780,Q9NZN3,Q5E9R3,Q9NZN4,Q3ZC55,Q9H4M9,Q3B7N2
GO:2001135	biological_process	regulation of endocytic recycling	0.00577218	482	0.00445135	364	-0.374874	0.000168	1	0.00520188	0.00400571	-0.376977	0.000152	1	0.00679	GILETNFNTLQTK,MISDINR,ILAGDKPYITVEELR,SIALTMEGPLEDQLK,LEPLEFQQCLVSLGYDVK,LAVLQDVDSLLLEFAK,VSWEQLLTAIAR,MASDLLDWISK,GLLDAAWER,ADMVTTQQLMR,SLSSFGNAFLNR,MDELELVHQDVQEAM,ANVVGEWIK,FAIQDINIEESAAK,DGLLLWCQR,LDHLAEK,IMAIVDPNGTGYVTF,ALQFVYSK,LAVLQDVDSLLL,DSDGTLNDIQNKLDALR,ILAGDKPYITVEE,NINEIENQILT,VINTPEVAR,VDSINER,LGNRPAYLPT,ILAGDKPYITVEEL,DDPLGNLNLAF,DSDGTLNDIQNK,AAPYNNWLESAR,MMEEYEK,NINEIENQILTR,MAPYE…	GILETNFNTLQTK,ILAGDKPYITVEELR,LEPLEFQQCLVSLGYDVK,DDPLGNLNLAFEVADK,MASDLLDWISK,ADMVTTQQLMR,SLSSFGNAFLNR,MDELELVHQDVQEAM,ANVVGEWIK,FAIQDINIEESAAK,IMAIVDPNGTGYVTF,ALQFVYSK,DSDGTLNDIQNKLDALR,ILAGDKPYITVEE,MLPWLQDRDSDGTLNDIQNK,IWTLSDIDRDGQLDEEEF,ILAGDKPYITVEEL,LDISDEFQR,AAQELER,AWGNLEASEK,MLDAEEMVNMAKPDER,LAVLQDVDSLL,MLANDIPR,CQYICDEWAK,VLTINKDNEK,LGNRPAYLPTEGK,MLPWLQDR,NPQVFNSVVDGLR,MISDINR,SIALTMEGP…	lcl|c234934_g3_i3|m.20432,lcl|c239887_g1_i1|m.26471,lcl|c243788_g1_i5|m.31318	lcl|c234934_g3_i3|m.20432,lcl|c239887_g1_i1|m.26471,lcl|c243788_g1_i5|m.31318	A5D7D1,Q08043,Q7TPR4,Q90734,Q9Z1P2,Q2PFV7,P12814,Q9H223,Q0III9,Q5RBP4,L7UZ85,P05094,Q641Z6,P20111,O88990,Q7PKQ5,P18091,Q9JI91,Q8NF91,P35609,Q8BH64,Q4V8H8,Q9EQP2,Q9QXY6,Q9QXQ0,Q5RCS6,Q8R491,O43707,Q9WVK4,P57780,Q9NZN3,Q5E9R3,Q9NZN4,Q3ZC55,Q9H4M9,Q3B7N2	A5D7D1,Q08043,Q7TPR4,Q90734,Q9Z1P2,Q2PFV7,P12814,Q9H223,Q0III9,Q5RBP4,L7UZ85,P05094,Q641Z6,P20111,O88990,Q7PKQ5,P18091,Q9JI91,Q8NF91,P35609,Q8BH64,Q4V8H8,Q9EQP2,Q9QXY6,Q9QXQ0,Q5RCS6,Q8R491,O43707,Q9WVK4,P57780,Q9NZN3,Q5E9R3,Q9NZN4,Q3ZC55,Q9H4M9,Q3B7N2
GO:2001120	biological_process	methanofuran biosynthetic process	0.021496	1795	0.0229538	1877	0.0946655	0.0444	1	0.0193428	0.0206102	0.0915594	0.052	1	0.4	EPPEQIQR,VEYGADVR,AQPGVDEQKK,LNVHATNQISAR,QAIADEGFVPELPLSLF,NYFPSDPAYVTPEIKDSLAY,INDVLSSMVEADTPYYY,YFPLGLQEALMK,QAIADEGFVPELPLSL,SNEEIEENTK,GHVVWDPSMPAQLG,VPELAGAQGMSIDLPGGGTKK,SNEEIEENTKAMA,QAIADEGFVPELPLS,FLPLAMQDAVK,SVPYFTPR,STIVPDDPVQF,KNYFPSDPAYVTPEIK,AENEEIYKEMVLEAV,NYFPSDPAYVTPEIKDSLA,LCSQLNDALFK,RFDLTDIR,GHVVWDPSMPAQ,ETILIPCDENS,IAYTINQGNSSTSDQLTY,GHVVWDPSMPAQLGFLT,KNYFPSDPAY,ETILIPCDENSR…	EPPEQIQR,VEYGADVR,LNVHATNQISAR,NYFPSDPAYVTPEIKDSLAY,INDVLSSMVEADTPYYY,QAIADEGFVPELPLSL,KNYFPSDPAYVTPEIKDSLAY,SNEEIEENTK,QAIADEGFVPELPLSLFVQ,AVDSHIGYR,QAIADEGFVPELPLS,WAALGAWFLGPK,SVPYFTPR,STIVPDDPVQF,GHVVWDPSMPAQL,NYFPSDPAYVTPEIKDSLA,RFDLTDIR,LCSQLNDALF,GHVVWDPSMPAQ,GHVVWDPSMPAQLGFLT,KNYFPSDPAY,ETILIPCDENSR,QAIADEGFVPELPL,KLVEANTWDL,VFFPQFNEER,STIVPDDPVQFIR,NSILCAIGR,TTDGPLVFR,PGNSAAAVYLASK,VGAWF…	lcl|c224312_g2_i4|m.9721,lcl|c224312_g2_i3|m.9718,lcl|c242743_g1_i1|m.30188	lcl|c224312_g2_i4|m.9721,lcl|c224312_g2_i3|m.9718,lcl|c242743_g1_i1|m.30188	O27188	O27188
GO:2001119	biological_process	methanofuran metabolic process	0.021496	1795	0.0229538	1877	0.0946655	0.0444	1	0.0193428	0.0206102	0.0915594	0.052	1	0.4	EPPEQIQR,VEYGADVR,AQPGVDEQKK,LNVHATNQISAR,QAIADEGFVPELPLSLF,NYFPSDPAYVTPEIKDSLAY,INDVLSSMVEADTPYYY,YFPLGLQEALMK,QAIADEGFVPELPLSL,SNEEIEENTK,GHVVWDPSMPAQLG,VPELAGAQGMSIDLPGGGTKK,SNEEIEENTKAMA,QAIADEGFVPELPLS,FLPLAMQDAVK,SVPYFTPR,STIVPDDPVQF,KNYFPSDPAYVTPEIK,AENEEIYKEMVLEAV,NYFPSDPAYVTPEIKDSLA,LCSQLNDALFK,RFDLTDIR,GHVVWDPSMPAQ,ETILIPCDENS,IAYTINQGNSSTSDQLTY,GHVVWDPSMPAQLGFLT,KNYFPSDPAY,ETILIPCDENSR…	EPPEQIQR,VEYGADVR,LNVHATNQISAR,NYFPSDPAYVTPEIKDSLAY,INDVLSSMVEADTPYYY,QAIADEGFVPELPLSL,KNYFPSDPAYVTPEIKDSLAY,SNEEIEENTK,QAIADEGFVPELPLSLFVQ,AVDSHIGYR,QAIADEGFVPELPLS,WAALGAWFLGPK,SVPYFTPR,STIVPDDPVQF,GHVVWDPSMPAQL,NYFPSDPAYVTPEIKDSLA,RFDLTDIR,LCSQLNDALF,GHVVWDPSMPAQ,GHVVWDPSMPAQLGFLT,KNYFPSDPAY,ETILIPCDENSR,QAIADEGFVPELPL,KLVEANTWDL,VFFPQFNEER,STIVPDDPVQFIR,NSILCAIGR,TTDGPLVFR,PGNSAAAVYLASK,VGAWF…	lcl|c224312_g2_i4|m.9721,lcl|c224312_g2_i3|m.9718,lcl|c242743_g1_i1|m.30188	lcl|c224312_g2_i4|m.9721,lcl|c224312_g2_i3|m.9718,lcl|c242743_g1_i1|m.30188	O27188	O27188
GO:2001113	biological_process	negative regulation of cellular response to hepatocyte growth factor stimulus	1.2e-05	1	1.22e-05	1	0.0302207	0.988	1	2.15e-05	2.19e-05	0.0271497	0.985	1	0.992	VQTVTAAGTTIK	LDPNDQNR	lcl|c232745_g5_i1|m.17734	lcl|c232745_g5_i1|m.17734	Q811B3	Q811B3
GO:2001112	biological_process	regulation of cellular response to hepatocyte growth factor stimulus	1.2e-05	1	1.22e-05	1	0.0302207	0.988	1	2.15e-05	2.19e-05	0.0271497	0.985	1	0.992	VQTVTAAGTTIK	LDPNDQNR	lcl|c232745_g5_i1|m.17734	lcl|c232745_g5_i1|m.17734	Q811B3	Q811B3
GO:1990266	biological_process	neutrophil migration	0.000228	19	0.000269	22	0.241725	0.592	1	0.000215	0.000252	0.228784	0.604	1	0.908	VLIYDIYR,GIELPYSQK,EAQSCNNDEGGLR,IEGSGFQSGLK,FSVLSRPDVVSGAPR,LGSAASEASSPR	VLIYDIYR,GIELPYSQK,EAQSCNNDEGGLR,IEGSGFQSGLK,LGSAASEASSPR,VCNNLLWGLINQGYK	lcl|c223277_g3_i4|m.8995,lcl|c233135_g1_i3|m.18177,lcl|c238409_g2_i5|m.24505	lcl|c223277_g3_i4|m.8995,lcl|c235551_g1_i10|m.21062,lcl|c233135_g1_i3|m.18177,lcl|c235551_g1_i6|m.21068,lcl|c238409_g2_i5|m.24505,lcl|c235551_g1_i2|m.21064	P05126,P05128,Q92538,P05129,Q7SY24,B8JK39,Q25378,P17252,P90980,P05130,Q4R4U2,Q9R1D7,P05772,P05771,P05696,Q16974,P10102,P04409,P13677,P68404,P68403,Q7LZQ8,P63318,P63319,P10829,P20444,A8KBH6	P05126,P05128,Q92538,P05129,Q7SY24,B8JK39,Q25378,P17252,P90980,P05130,Q4R4U2,Q9R1D7,P05772,P05771,P05696,Q16974,P10102,P04409,P13677,Q60992,P68404,P68403,Q7LZQ8,P63318,P63319,Q9R0C8,P10829,P20444,A8KBH6
GO:1990264	biological_process	peptidyl-tyrosine dephosphorylation involved in inactivation of protein kinase activity	1.2e-05	1	1.22e-05	1	0.0302207	0.988	1	2.15e-05	2.19e-05	0.0271497	0.985	1	0.992	GDDQENAEQNSTADAK	GDDQENAEQNSTADAK	lcl|c213844_g3_i2|m.3224	lcl|c213844_g3_i2|m.3224	P18031	P18031
GO:1990258	biological_process	histone glutamine methylation	8.38e-05	7	3.67e-05	3	-1.19217	0.218	1	8.62e-05	4.39e-05	-0.97285	0.262	1	0.82	NIVPGDSVYGEK,TNVIPIIEDAR	LAAAILGGIDK,NIVPGDSVYGEK,TNVIPIIEDAR	lcl|c212652_g1_i4|m.2791,lcl|c212652_g1_i3|m.2790	lcl|c212652_g1_i4|m.2791,lcl|c212652_g1_i3|m.2790	Q8I1F4,Q9W1V3	Q8I1F4,Q9W1V3
GO:1990253	biological_process	cellular response to leucine starvation	5.99e-05	5	4.89e-05	4	-0.291707	0.763	1	6.46e-05	5.49e-05	-0.235885	0.787	1	0.944	SDLQSMGLK,LALADAGDTVEDANFVEK,ANGFLLLNSEK,QTGEGVAPQEYTGIK,TGFYELQAAR	SDLQSMGLK,TGFYELQAAR	lcl|c233212_g2_i5|m.18273,lcl|c233212_g2_i6|m.18275	lcl|c233212_g2_i5|m.18273,lcl|c233212_g2_i6|m.18275	Q9P2J5,Q8BMJ2	Q9P2J5,Q8BMJ2
GO:0030834	biological_process	regulation of actin filament depolymerization	0.0393514	3286	0.0350116	2863	-0.168584	3.15e-06	0.0294	0.0354008	0.0314311	-0.17159	2.18e-06	0.0204	0.000444	ENLLTDDLGR,VSEDEEKEKEDTGEIK,SGQDLLDSGHY,GGADSGFNKVEEK,VFTYWK,GQELVDSDHSEK,QEAFLADDNLGDSLDGVEALIR,DHQAELEGAYNELLQLAAAR,IMAIVDPNGTGYVTF,VEPTDYKPR,QLNPNTTVK,QGFVPAAYVK,EIPGAYDYK,EPSEYDILHIQNQK,LTTFELR,SEEDRITEAEKNER,NVDNRYDNLMQQAAQR,HPLDSASTDLLEVSR,SKVDVVDGDNWESK,MLLFTQK,MLDAEEMVNMAKPDER,SWISEKDTALSTSDYGR,ETWLNENQR,LDTMANEREELEK,ETENVGSSQEVINAFK,TLAVQDVK,GHLDDSLQAQQ,DKTDAGEKSEK,KLEDSIQR,VKVTEVAYCK,A…	HSLVEADIAAQADR,ENLLTDDLGR,SGQDLLDSGHY,GGADSGFNKVEEK,VFTYWK,GQELVDSDHSEK,QEAFLADDNLGDSLDGVEALIR,DHYATPEINEK,DHQAELEGAYNELLQLAAAR,TQDLQEKYDNLK,IMAIVDPNGTGYVTF,VEPTDYKPR,QLNPNTTVK,QGFVPAAYVK,EIPGAYDYK,EPSEYDILHIQNQK,LTTFELR,SEEDRITEAEKNER,NVDNRYDNLMQQAAQR,EQIDEIKTK,SKVDVVDGDNWESK,MLLFTQK,MLDAEEMVNMAKPDER,SWISEKDTALSTSDYGR,ETWLNENQR,ETENVGSSQEVINAFK,TLAVQDVK,DKVLSSDDYGK,RLAELVK,GHLDDSLQAQQ,DKTDAGEKSE…	lcl|c241874_g1_i11|m.29053,lcl|c241874_g1_i11|m.29054,lcl|c241874_g1_i8|m.29086,lcl|c233306_g1_i7|m.18391,lcl|c236527_g2_i1|m.22205,lcl|c238429_g5_i1|m.24515,lcl|c229592_g3_i11|m.14442,lcl|c241874_g1_i2|m.29059,lcl|c224029_g4_i2|m.9565,lcl|c241874_g1_i8|m.29081,lcl|c241874_g1_i8|m.29082,lcl|c232095_g2_i1|m.16982,lcl|c224029_g4_i1|m.9563,lcl|c231477_g1_i1|m.16301,lcl|c220695_g1_i1|m.7091,lcl|c2226…	lcl|c241874_g1_i8|m.29086,lcl|c238429_g5_i1|m.24515,lcl|c229592_g3_i11|m.14442,lcl|c224029_g4_i2|m.9565,lcl|c241874_g1_i8|m.29081,lcl|c241874_g1_i8|m.29082,lcl|c232095_g2_i1|m.16982,lcl|c224029_g4_i1|m.9563,lcl|c238429_g5_i5|m.24520,lcl|c220695_g1_i1|m.7091,lcl|c242633_g1_i1|m.30058,lcl|c241874_g1_i8|m.29078,lcl|c243788_g1_i5|m.31318,lcl|c241874_g1_i8|m.29079,lcl|c231477_g1_i8|m.16302,lcl|c239346…	Q9NYL9,Q08043,Q76NU1,Q2PFV7,Q62847,P12814,P31410,P35611,P31411,L7UZ85,P13395,Q5RJR2,P05094,P16140,P20111,Q91YR1,P07751,Q7JQD3,P02640,Q8MPM1,Q9NRC6,Q7PKQ5,Q63028,Q9W2N0,P18091,Q91955,P31407,Q19626,Q8NF91,P35609,P31409,Q5R507,P31408,Q43433,Q01082,P16546,P31401,Q43432,P11574,Q6EDY6,Q619C0,P57780,Q3ZC55,Q3B7N2,O15020,A5D7D1,Q7TPR4,Q90734,Q13813,Q9Z1P2,P62815,P26043,P15508,P79136,Q62261,Q40079,Q40078,…	Q9NYL9,Q08043,Q76NU1,Q2PFV7,Q62847,P12814,P31410,P35611,P31411,L7UZ85,P13395,Q5RJR2,P05094,P16140,P20111,Q91YR1,P07751,Q7JQD3,P02640,Q8MPM1,Q9NRC6,Q7PKQ5,Q63028,Q9W2N0,P18091,Q91955,P31407,Q19626,Q8NF91,P35609,P31409,Q5R507,P31408,Q43433,Q01082,P16546,P31401,Q43432,P11574,Q6EDY6,Q619C0,P57780,Q3ZC55,Q3B7N2,O15020,A5D7D1,Q7TPR4,Q90734,Q13813,Q9Z1P2,P62815,P26043,P15508,P79136,Q62261,Q40079,Q40078,…
GO:0032970	biological_process	regulation of actin filament-based process	0.0564524	4714	0.051325	4197	-0.137373	3.94e-06	0.0368	0.0507803	0.0460711	-0.140406	2.56e-06	0.0239	0.000488	ENLLTDDLGR,QIVPSTENIK,VSEDEEKEKEDTGEIK,YNPTEVGR,SGQDLLDSGHY,GGADSGFNKVEEK,VFTYWK,GQELVDSDHSEK,QEAFLADDNLGDSLDGVEALIR,LFTDLREI,SDCVGGGR,DHQAELEGAYNELLQLAAAR,EPPTELQGTDAR,IMAIVDPNGTGYVTF,VEPTDYKPR,QLNPNTTVK,AAVGYEYK,QGFVPAAYVK,EIPGAYDYK,EPSEYDILHIQNQK,LTTFELR,SEEDRITEAEKNER,NVDNRYDNLMQQAAQR,ERETGIPPEQSMETAK,HPLDSASTDLLEVSR,TVELALWDTAGQEDYDR,YGEYFPGTGDLR,VLVCDNGTGFVK,TPLTSEQAFYAR,SKVDVVDGDNWESK,ALQA…	HSLVEADIAAQADR,ENLLTDDLGR,VLNDQIFAVLNK,SGQDLLDSGHY,GGADSGFNKVEEK,VFTYWK,GQELVDSDHSEK,QEAFLADDNLGDSLDGVEALIR,SSILSNDMSSLK,DHYATPEINEK,DHQAELEGAYNELLQLAAAR,TQDLQEKYDNLK,EPPTELQGTDAR,IMAIVDPNGTGYVTF,VEPTDYKPR,QLNPNTTVK,QGFVPAAYVK,EIPGAYDYK,EPSEYDILHIQNQK,LTTFELR,SEEDRITEAEKNER,NVDNRYDNLMQQAAQR,ERETGIPPEQSMETAK,TVELALWDTAGQEDYDR,EQIDEIKTK,YGEYFPGTGDLR,VLVCDNGTGFVK,TPLTSEQAFYAR,SKVDVVDGDNWESK,LQNGRPVN…	lcl|c234060_g2_i2|m.19387,lcl|c235052_g1_i3|m.20523,lcl|c242947_g1_i3|m.30437,lcl|c241874_g1_i8|m.29086,lcl|c232719_g2_i1|m.17712,lcl|c226782_g6_i4|m.11783,lcl|c214211_g3_i3|m.3396,lcl|c229592_g3_i11|m.14442,lcl|c241874_g1_i8|m.29081,lcl|c241874_g1_i8|m.29082,lcl|c243541_g3_i2|m.31058,lcl|c220695_g1_i1|m.7091,lcl|c222307_g1_i1|m.8241,lcl|c230102_g4_i1|m.14957,lcl|c218214_g1_i1|m.5632,lcl|c242633_…	lcl|c234060_g2_i2|m.19387,lcl|c235052_g1_i3|m.20523,lcl|c242947_g1_i3|m.30437,lcl|c296217_g1_i1|m.32460,lcl|c241874_g1_i8|m.29086,lcl|c232719_g2_i1|m.17712,lcl|c226782_g6_i4|m.11783,lcl|c214211_g3_i3|m.3396,lcl|c229592_g3_i11|m.14442,lcl|c241874_g1_i8|m.29081,lcl|c241874_g1_i8|m.29082,lcl|c243541_g3_i2|m.31058,lcl|c220695_g1_i1|m.7091,lcl|c230102_g4_i1|m.14957,lcl|c218214_g1_i1|m.5632,lcl|c224520…	A5A6I5,P27112,Q7ZXV3,Q32PJ8,Q9JM76,Q64392,E7F9L8,F1PRN2,O14786,Q8BYC6,Q5SYD0,P07751,P52565,P30998,P28693,Q9UBC5,Q8NF91,Q43433,Q43432,O00159,P40792,O00160,A5DKH0,P61158,P61157,P59083,P54632,Q13813,Q12965,P30626,A1DBH2,Q6BUQ2,Q40079,Q40078,Q0III9,P61161,P61160,P19706,Q9VVI3,Q23979,Q5XI32,Q23978,Q4QQW4,B0CRJ3,Q7L576,A7EK16,Q62083,Q299G2,O73723,P50570,Q5SQX6,P31410,P31411,L7UZ85,P16140,Q8C033,Q92769,…	A5A6I5,P27112,Q7ZXV3,Q32PJ8,Q9JM76,Q64392,E7F9L8,F1PRN2,O14786,Q8BYC6,Q5SYD0,P07751,P52565,P30998,P28693,Q9UBC5,Q8NF91,Q43433,Q43432,O00159,P40792,O00160,A5DKH0,P61158,P61157,P59083,P54632,Q13813,Q12965,P30626,A1DBH2,Q9Z136,Q6BUQ2,Q40079,Q40078,Q0III9,P61161,P61160,Q21313,P19706,Q9VVI3,Q8BKF1,Q23979,Q5XI32,Q23978,Q4QQW4,B0CRJ3,Q7L576,A7EK16,Q62083,Q299G2,O73723,P50570,Q5SQX6,P31410,P31411,L7UZ85,…
GO:0031532	biological_process	actin cytoskeleton reorganization	0.0232923	1945	0.0199944	1635	-0.220259	4.13e-06	0.0386	0.0209583	0.0179543	-0.223189	3.13e-06	0.0292	0.000573	HNLEQQIQAR,NISFNDKK,YNPTEVGR,GDDQENAEQNSTADAK,QEAFLADDNLGDSLDGVEALIR,MDELELVHQDVQEAM,IMAIVDPNGTGYVTF,AAVGYEYK,QGFVPAAYVK,EIPGAYDYK,LMDEAMCSR,EPSEYDILHIQNQK,ITEAEKNER,TTQSVIVTGR,SEEDRITEAEKNER,EEAIEEYLK,DLASVQNLIK,NDKLTPR,LAGAQQIHSFYR,AWGNLEASEK,MLLFTQK,MLDAEEMVNMAKPDER,LAVLQDVDSLL,SWISEKDTALSTSDYGR,TSAHASQK,TLAVQDVK,LDTMANEREELEK,ETENVGSSQEVINAFK,GHLDDSLQAQQ,KLEDSIQR,LAEDESEK,VAMVDGQGDLEDQLAEVK,D…	HNLEQQIQAR,NTTGVSEDTLKEF,NISFNDKK,GDDQENAEQNSTADAK,QEAFLADDNLGDSLDGVEALIR,MDELELVHQDVQEAM,IMAIVDPNGTGYVTF,QIEFNLDVQER,QGFVPAAYVK,EIPGAYDYK,LMDEAMCSR,TSDSGTYSCIADHPGGWTESAVAK,EPSEYDILHIQNQK,ITEAEKNER,TTQSVIVTGR,HELEEAWANL,SEEDRITEAEKNER,IQAVLSCGQKF,EEAIEEYLK,EQIDEIKTK,DLASVQNLIK,NDKLTPR,LAGAQQIHSFYR,AWGNLEASEK,MLLFTQK,MLDAEEMVNMAKPDER,LAVLQDVDSLL,SWISEKDTALSTSDYGR,TLAVQDVK,ETENVGSSQEVINAFK,DKVLSSD…	lcl|c241874_g1_i11|m.29053,lcl|c241874_g1_i11|m.29054,lcl|c241874_g1_i8|m.29086,lcl|c233306_g1_i7|m.18391,lcl|c214211_g3_i3|m.3396,lcl|c244474_g2_i1|m.32252,lcl|c241874_g1_i2|m.29059,lcl|c241874_g1_i8|m.29081,lcl|c224694_g1_i1|m.10068,lcl|c241874_g1_i8|m.29082,lcl|c236174_g2_i4|m.21790,lcl|c233306_g1_i1|m.18389,lcl|c222307_g1_i1|m.8241,lcl|c241874_g1_i5|m.29072,lcl|c241874_g1_i5|m.29071,lcl|c2344…	lcl|c241874_g1_i11|m.29053,lcl|c241874_g1_i11|m.29054,lcl|c241874_g1_i8|m.29086,lcl|c233306_g1_i7|m.18391,lcl|c214211_g3_i3|m.3396,lcl|c227572_g1_i1|m.12593,lcl|c244474_g2_i1|m.32252,lcl|c241874_g1_i2|m.29059,lcl|c241874_g1_i8|m.29081,lcl|c224694_g1_i1|m.10068,lcl|c241874_g1_i8|m.29082,lcl|c217096_g5_i1|m.4965,lcl|c236174_g2_i4|m.21790,lcl|c233306_g1_i1|m.18389,lcl|c241874_g1_i5|m.29072,lcl|c2418…	Q08043,P70182,Q2PFV7,P12814,P63001,L7UZ85,P13395,P05094,Q7TPD3,P63000,P61226,P62998,P61225,P20111,P62999,O14786,Q01406,P07751,P61227,Q9NRC6,Q7PKQ5,Q60598,P18091,Q8CFN2,Q8NF91,P35609,Q2KJ93,Q01082,P16546,P40792,P57780,Q3ZC55,Q3B7N2,P21333,A5D7D1,O15020,Q7TPR4,Q90734,Q13813,Q9Z1P2,P26040,P26043,P15508,Q62261,P34147,P15311,Q0III9,P16086,P02549,Q007T2,Q9QWN8,Q90694,Q9HB97,P60953,O88990,P60952,Q9JI91,…	Q08043,P70182,Q2PFV7,P12814,P63001,L7UZ85,P13395,P05094,Q7TPD3,P63000,P61226,P62998,P61225,P20111,P62999,O14786,Q01406,P07751,P98083,P61227,Q9NRC6,Q7PKQ5,Q60598,P18091,Q8CFN2,Q8NF91,P35609,Q2KJ93,Q01082,P16546,Q8BKG3,P40792,P57780,Q3ZC55,Q3B7N2,P21333,A5D7D1,O15020,Q7TPR4,Q90734,Q13813,P29353,Q9Z1P2,P26040,P26043,P15508,Q62261,P15311,Q0III9,Q0IIE2,P16086,Q5M824,P02549,Q007T2,Q9QWN8,Q90694,Q9HB97,…
GO:2000379	biological_process	positive regulation of reactive oxygen species metabolic process	0.00483809	404	0.00656696	537	0.440788	3e-06	0.0281	0.00436183	0.0059043	0.436834	3.62e-06	0.0338	0.000627	LGIHEDSVNR,FFTGQITAAGK,VPVGDQPPDIEMLIR,APFDLFENR,TVIGGLTGSDPVSCSR,YESLTDPSKLDSCK,DNSTLGYMAAK,GMEDLIPIMNK,EIVAETDRETGSNK,IELVPNKDDNTLTIVDTGIGMTK,DLIDLIAK,DAFASDIVFK,AQELLLAK,IELVPNKDDNTLT,IELVPNK,AQYAIADMVK,QVDENEAR,LTAEQALAHPY,ADLVNNLGTIAK,TLFPGNDHIDQLT,NQEDNLDEINK,AIEGGGDSIDTK,ELISNSSDALDKIR,LSEEVLPR,ILDFGLAR,GSIVLQDGK,QGPFDAVILPGGLGGTQNLAQSAK,SMAGEIGTLDPQMER,AQSFDALSSMANIAGYK,GFDVRPAVK,AGELYNHN…	LGIHEDSVNR,FFTGQITAAGK,TLAENLGLK,HLEVNPDHSIVET,APFDLFENR,IELVPNKDDNTL,TVIGGLTGSDPVSCSR,YESLTDPSKLDSCK,VFIMDNCEDIIPEYLNFIK,DNSTLGYMAAK,IELVPNKDDNTLTIVDTGIGMTK,DLIDLIAK,AQELLLAK,IELVPNKDDNTLT,HLEVNPDHSIVETLR,AQYAIADMVK,QVDENEAR,LTAEQALAHPY,MMWPPPPIEMPAPSAPK,ADLVNNLGTIAK,NQEDNLDEINK,AIEGGGDSIDTK,YHSSASGDEMTSL,ELISNSSDALDKIR,LSEEVLPR,ILDFGLAR,GSIVLQDGK,MAEEEMTGYVATR,QGPFDAVILPGGLGGTQNLAQSAK,AQSFDALSS…	lcl|c219763_g5_i3|m.6564,lcl|c229550_g1_i3|m.14392,lcl|c238537_g2_i6|m.24628,lcl|c221440_g2_i5|m.7632,lcl|c219953_g4_i1|m.6659,lcl|c219953_g4_i2|m.6660,lcl|c238537_g2_i3|m.24626,lcl|c224463_g4_i2|m.9831,lcl|c242868_g4_i4|m.30303,lcl|c238537_g2_i7|m.24630,lcl|c221440_g2_i2|m.7631,lcl|c224463_g4_i7|m.9834,lcl|c239343_g4_i4|m.25612,lcl|c227328_g1_i1|m.12337,lcl|c226414_g3_i1|m.11460,lcl|c201183_g1_i…	lcl|c220106_g1_i3|m.6753,lcl|c229550_g1_i3|m.14392,lcl|c238537_g2_i6|m.24628,lcl|c221440_g2_i5|m.7632,lcl|c219953_g4_i1|m.6659,lcl|c219953_g4_i2|m.6660,lcl|c238537_g2_i3|m.24626,lcl|c224463_g4_i2|m.9831,lcl|c242868_g4_i4|m.30303,lcl|c238537_g2_i7|m.24630,lcl|c221440_g2_i2|m.7631,lcl|c224463_g4_i7|m.9834,lcl|c239343_g4_i4|m.25612,lcl|c227328_g1_i1|m.12337,lcl|c226414_g3_i1|m.11460,lcl|c201183_g1_i…	Q4LE85,P07901,P07900,P50570,Q66HD0,Q69QQ6,Q07078,Q95M18,Q8BZ98,Q90474,Q60631,P27323,Q76LV2,Q61W58,Q08877,P11499,P04809,Q76LV1,O57521,Q9GKX8,Q22235,P39054,P70618,P39053,Q9GKX7,P39055,Q9GM70,P39052,P82995,P36181,Q4R4P1,Q4R4T5,P21575,Q05193,O02705,Q5R710,A5A6K9,P30947,P30946,Q9UQ16,P11501,Q7PT10,Q08DF4,P55008,P11024,O61998,O02192,P02828,A6H7I5,Q5E946,P47812,Q04619,P23640,Q9BLC5,P47811,Q13423,Q61941,…	Q4LE85,P07901,P07900,P50570,Q66HD0,Q69QQ6,Q07078,Q95M18,Q8BZ98,Q90474,P27323,Q76LV2,Q61W58,Q08877,P11499,P04809,Q76LV1,O57521,Q9GKX8,Q22235,P39054,P70618,P39053,Q9GKX7,P39055,Q9GM70,P39052,P82995,P36181,Q4R4P1,Q4R4T5,P21575,Q05193,O02705,Q5R710,A5A6K9,P30947,P30946,Q9UQ16,P11501,Q7PT10,Q08DF4,P55008,P11024,O61998,O02192,P02828,A6H7I5,Q5E946,P47812,P07895,Q04619,P23640,Q9BLC5,P47811,Q13423,Q61941,…
GO:0032768	biological_process	regulation of monooxygenase activity	0.00288609	241	0.00423122	346	0.55196	4.31e-06	0.0403	0.00260633	0.00380817	0.547078	5.06e-06	0.0473	0.000844	LGIHEDSVNR,VPVGDQPPDIEMLIR,APFDLFENR,EMLQQNK,TVIGGLTGSDPVSCSR,DYCSEMNADLAK,FYEQFGK,SVVVKPDMSLEDAIK,DNSTLGYMAAK,QIAVALCEAISPTGV,DQVSHSAFVEQVK,SLTNDWEEHLAVK,SSVLENFVGR,GMEDLIPIMNK,YHSSASGDEMT,EIVAETDRETGSNK,NTDEITAEEYGEFYK,EILQEQEK,VKEILQEQEK,ITDQRPETASGYWNDLK,AIEGGGDSIDTK,QGPFDAVILPGGLGGTQNLAQSAK,GISSLPINLR,EGLELPEDEEEK,GFEVLYMTEPIDEYAVQQLK,GADFWWSDLSVPVYR,SMAGEIGTLDPQMER,ITSQQENDFVLALAR,IEADKNDK,…	DIYYITGENK,LGIHEDSVNR,HLEVNPDHSIVET,VGLFTPDMAFEAIVK,APFDLFENR,EMLQQNK,TVIGGLTGSDPVSCSR,DYCSEMNADLAK,VFIMDNCEDIIPEYLNFIK,FYEQFGK,SVVVKPDMSLEDAIK,DNSTLGYMAAK,SLTNDWEEHLAVK,SSVLENFVGR,TVIGGLTGSDPVSCS,NTDEITAEEYGEFYK,HLEVNPDHSIVETLR,RAPFDLFENR,YHSSASGDEMTSLK,EILQEQEK,VKEILQEQEK,ITDQRPETASGYWNDLK,HLEVNPDHSIVETL,YHSSASGDEMTSL,AIEGGGDSIDTK,TQEISYTDTK,QGPFDAVILPGGLGGTQNLAQSAK,GFEVLYMTEPIDEYAVQQLK,GADFWWS…	lcl|c239132_g4_i1|m.25330,lcl|c229550_g1_i3|m.14392,lcl|c239132_g4_i2|m.25331,lcl|c239343_g4_i4|m.25612,lcl|c226414_g3_i1|m.11460,lcl|c201183_g1_i1|m.1185,lcl|c223266_g1_i3|m.8987	lcl|c227706_g1_i7|m.12694,lcl|c239132_g4_i1|m.25330,lcl|c229550_g1_i3|m.14392,lcl|c239132_g4_i2|m.25331,lcl|c239343_g4_i4|m.25612,lcl|c226414_g3_i1|m.11460,lcl|c227706_g1_i4|m.12692,lcl|c201183_g1_i1|m.1185	P07901,P07900,P50570,Q69QQ6,Q07078,Q8BZ98,Q90474,P27323,Q76LV2,Q61W58,Q08877,P11499,P30793,P04809,Q76LV1,O57521,Q9GKX8,P39054,P39053,Q9GKX7,P39055,P39052,P82995,P36181,Q4R4P1,Q4R4T5,P21575,Q05193,O02705,Q5R710,A5A6K9,P30947,P30946,Q9UQ16,P11501,Q7PT10,Q08DF4,O61998,O02192,P02828,A6H7I5,P20693,Q5E946,Q04619,Q9BLC5,P34058,P27619,Q18688,P08238,P46633	P07901,P07900,P50570,Q69QQ6,Q07078,Q8BZ98,Q90474,P27323,Q76LV2,Q91757,Q61W58,Q08877,P11499,P04809,Q76LV1,O57521,Q9GKX8,P39054,P39053,Q9GKX7,P39055,P39052,P49841,P82995,P36181,Q4R4P1,Q4R4T5,P21575,Q05193,O02705,Q5R710,A5A6K9,P30947,P30946,Q9UQ16,P18266,P11501,Q7PT10,Q08DF4,O61998,O02192,P02828,A6H7I5,P20693,Q5E946,Q04619,Q9BLC5,Q9WV60,Q5YJC2,P34058,P27619,Q18688,P08238,P46633
GO:0032956	biological_process	regulation of actin cytoskeleton organization	0.051782	4324	0.0470204	3845	-0.139162	8e-06	0.0748	0.04658	0.0422081	-0.142192	5.34e-06	0.0499	0.000876	ENLLTDDLGR,QIVPSTENIK,VSEDEEKEKEDTGEIK,YNPTEVGR,SGQDLLDSGHY,GGADSGFNKVEEK,VFTYWK,GQELVDSDHSEK,QEAFLADDNLGDSLDGVEALIR,LFTDLREI,SDCVGGGR,DHQAELEGAYNELLQLAAAR,EPPTELQGTDAR,IMAIVDPNGTGYVTF,VEPTDYKPR,QLNPNTTVK,AAVGYEYK,QGFVPAAYVK,EIPGAYDYK,EPSEYDILHIQNQK,LTTFELR,SEEDRITEAEKNER,NVDNRYDNLMQQAAQR,ERETGIPPEQSMETAK,HPLDSASTDLLEVSR,TVELALWDTAGQEDYDR,YGEYFPGTGDLR,VLVCDNGTGFVK,TPLTSEQAFYAR,SKVDVVDGDNWESK,ALQA…	HSLVEADIAAQADR,ENLLTDDLGR,VLNDQIFAVLNK,SGQDLLDSGHY,GGADSGFNKVEEK,VFTYWK,GQELVDSDHSEK,QEAFLADDNLGDSLDGVEALIR,SSILSNDMSSLK,DHYATPEINEK,DHQAELEGAYNELLQLAAAR,TQDLQEKYDNLK,EPPTELQGTDAR,IMAIVDPNGTGYVTF,VEPTDYKPR,QLNPNTTVK,QGFVPAAYVK,EIPGAYDYK,EPSEYDILHIQNQK,LTTFELR,SEEDRITEAEKNER,NVDNRYDNLMQQAAQR,ERETGIPPEQSMETAK,TVELALWDTAGQEDYDR,EQIDEIKTK,YGEYFPGTGDLR,VLVCDNGTGFVK,TPLTSEQAFYAR,SKVDVVDGDNWESK,LQNGRPVN…	lcl|c234060_g2_i2|m.19387,lcl|c235052_g1_i3|m.20523,lcl|c242947_g1_i3|m.30437,lcl|c241874_g1_i8|m.29086,lcl|c232719_g2_i1|m.17712,lcl|c226782_g6_i4|m.11783,lcl|c214211_g3_i3|m.3396,lcl|c229592_g3_i11|m.14442,lcl|c241874_g1_i8|m.29081,lcl|c241874_g1_i8|m.29082,lcl|c243541_g3_i2|m.31058,lcl|c220695_g1_i1|m.7091,lcl|c222307_g1_i1|m.8241,lcl|c230102_g4_i1|m.14957,lcl|c218214_g1_i1|m.5632,lcl|c242633_…	lcl|c234060_g2_i2|m.19387,lcl|c235052_g1_i3|m.20523,lcl|c242947_g1_i3|m.30437,lcl|c296217_g1_i1|m.32460,lcl|c241874_g1_i8|m.29086,lcl|c232719_g2_i1|m.17712,lcl|c226782_g6_i4|m.11783,lcl|c214211_g3_i3|m.3396,lcl|c229592_g3_i11|m.14442,lcl|c241874_g1_i8|m.29081,lcl|c241874_g1_i8|m.29082,lcl|c243541_g3_i2|m.31058,lcl|c220695_g1_i1|m.7091,lcl|c230102_g4_i1|m.14957,lcl|c218214_g1_i1|m.5632,lcl|c224520…	A5A6I5,Q2US45,Q4V7C7,O43795,Q7ZXV3,O42227,Q90YM8,Q3UMM4,Q32PJ8,Q7TMB8,Q9JM76,P32392,E7F9L8,F1PRN2,O14786,Q8BYC6,Q5SYD0,A8N2Y6,P07751,P52565,Q60598,Q9W2N0,P18091,P28693,Q9UBC5,Q8NF91,P20171,Q5R507,Q43433,Q6GPK9,Q62774,Q43432,O00159,P11574,Q6EDY6,A7MB62,P40792,Q9VF87,O88329,O00160,A5DKH0,P60984,P60983,P61158,P61157,Q06807,P59083,P22467,Q61411,P54632,Q61WW9,Q13813,Q12965,P62815,A1DBH2,Q5R6P6,P79136,…	A5A6I5,Q2US45,Q4V7C7,O43795,Q7ZXV3,O42227,Q90YM8,Q3UMM4,Q32PJ8,Q7TMB8,Q9JM76,P32392,E7F9L8,F1PRN2,O14786,Q8BYC6,Q5SYD0,A8N2Y6,P07751,P52565,Q60598,Q9W2N0,P18091,P28693,Q9UBC5,Q8NF91,P20171,Q5R507,Q43433,Q6GPK9,Q62774,Q43432,O00159,P11574,Q6EDY6,A7MB62,P40792,Q9VF87,O88329,O00160,A5DKH0,P60984,P60983,P61158,P61157,Q06807,P59083,P22467,Q61411,P54632,Q61WW9,Q13813,Q12965,P62815,A1DBH2,Q5R6P6,Q9Z136,…
GO:0014854	biological_process	response to inactivity	0.006347	530	0.00472038	386	-0.427171	8.45e-06	0.079	0.00571884	0.00424715	-0.429229	7.5e-06	0.0701	0.00117	GILETNFNTLQTK,TATMTVGPK,ILAGDKPYITVEELR,LEPLEFQQCLVSLGYDVK,LAVLQDVDSLLLEFAK,GVSPVSNPELLK,MASDLLDWISK,ALTSFDLETR,MDELELVHQDVQEAM,ANVVGEWIK,FAIQDINIEESAAK,IMAIVDPNGTGYVTF,ALQFVYSK,DSDGTLNDIQNKLDALR,ILAGDKPYITVEE,WNPFDLTK,ILAGDKPYITVEEL,QSPDTMTTGFGAPIDTK,TSASEQLSEYAK,AAQELER,LGTNYIQLPVNCPYK,AWGNLEASEK,AGQLAGSDPDYNNR,GPILLQDAQF,MLDAEEMVNMAKPDER,LAVLQDVDSLL,VLTINKDNEK,NNLLLDSYR,LGNRPAYLPTEGK,ASEQLSEFA…	GILETNFNTLQTK,TATMTVGPK,ILAGDKPYITVEELR,LEPLEFQQCLVSLGYDVK,GVSPVSNPELLK,DDPLGNLNLAFEVADK,MASDLLDWISK,MDELELVHQDVQEAM,ANVVGEWIK,FAIQDINIEESAAK,IMAIVDPNGTGYVTF,ALQFVYSK,DSDGTLNDIQNKLDALR,ILAGDKPYITVEE,TSTMTVGPK,WNPFDLTK,MLPWLQDRDSDGTLNDIQNK,ILAGDKPYITVEEL,QSPDTMTTGFGAPIDTK,TSASEQLSEYAK,AAQELER,LGTNYIQLPVNCPYK,AWGNLEASEK,AGQLAGSDPDYNNR,GPILLQDAQF,MLDAEEMVNMAKPDER,LAVLQDVDSLL,CQYICDEWAK,VLTINKDNEK,NN…	lcl|c239816_g8_i1|m.26351,lcl|c239816_g8_i5|m.26357,lcl|c234934_g3_i3|m.20432,lcl|c239816_g8_i3|m.26354,lcl|c233142_g2_i1|m.18198,lcl|c216784_g1_i4|m.4763,lcl|c233142_g2_i4|m.18201,lcl|c243788_g1_i5|m.31318,lcl|c216784_g1_i1|m.4762,lcl|c240682_g3_i1|m.27598	lcl|c239816_g8_i1|m.26351,lcl|c239816_g8_i5|m.26357,lcl|c234934_g3_i3|m.20432,lcl|c239816_g8_i3|m.26354,lcl|c233142_g2_i1|m.18198,lcl|c216784_g1_i4|m.4763,lcl|c233142_g2_i4|m.18201,lcl|c243788_g1_i5|m.31318,lcl|c216784_g1_i1|m.4762	A5D7D1,Q08043,Q9PWF7,Q62940,Q7TPR4,Q90734,Q64405,Q9Z1P2,Q2PFV7,P12814,O97492,Q27487,Q0III9,Q2I6W4,L7UZ85,P90682,O61235,P05094,Q9VVI3,Q96PU5,P04040,P20111,Q8CFI0,Q5RF10,O88990,P04762,Q7PKQ5,P18091,Q9JI91,Q9PT92,Q8NF91,P24270,P35609,Q5RBF2,O62839,Q9QXQ0,P17336,P46935,Q5RCS6,P46934,O43707,P46939,P57780,Q3ZC55,Q3B7N2,P00432	A5D7D1,Q08043,Q9PWF7,Q62940,Q7TPR4,Q90734,Q64405,Q9Z1P2,Q2PFV7,P12814,O97492,Q27487,Q0III9,Q2I6W4,L7UZ85,P90682,O61235,P05094,Q9VVI3,Q96PU5,P04040,P20111,Q8CFI0,Q5RF10,O88990,P04762,Q7PKQ5,P18091,Q9JI91,Q9PT92,Q8NF91,P24270,P35609,Q5RBF2,O62839,Q9QXQ0,P17336,P46935,Q5RCS6,P46934,O43707,P57780,Q3ZC55,Q3B7N2,P00432
GO:0033043	biological_process	regulation of organelle organization	0.0853851	7130	0.079525	6503	-0.102576	1.49e-05	0.14	0.0768005	0.0713784	-0.105627	9.05e-06	0.0846	0.00136	ENLLTDDLGR,TGAASSSSASSPAVQELR,FITEEAR,TVTGHGSGAR,YNPTEVGR,GGADSGFNKVEEK,SGQDLLDSGHY,NSPAIIFIDEIDAIAPK,KVTESTSK,LFTDLREI,SDCVGGGR,DHQAELEGAYNELLQLAAAR,EPPTELQGTDAR,VEPTDYKPR,AAVGYEYK,QVEHEEDEDGISDENLK,IGSSGAPVTDQSEETR,LMDEAMCSR,QYGNEDFLSELITK,LLEPVVNMTDMLR,LTTFELR,SEEDRITEAEKNER,HPLDSASTDLLEVSR,TVELALWDTAGQEDYDR,YGEYFPGTGDLR,TPLTSEQAFYAR,SKVDVVDGDNWESK,MLDAEEMVNMAKPDER,ETWLNENQR,SENESESAR,ELELDMDK…	ENLLTDDLGR,TGAASSSSASSPAVQELR,FITEEAR,GGADSGFNKVEEK,SGQDLLDSGHY,KVTESTSK,DHYATPEINEK,DHQAELEGAYNELLQLAAAR,TQDLQEKYDNLK,EPPTELQGTDAR,VEPTDYKPR,QVEHEEDEDGISDENLK,IGSSGAPVTDQSEETR,LMDEAMCSR,QYGNEDFLSELITK,LLEPVVNMTDMLR,LTTFELR,SEEDRITEAEKNER,TVELALWDTAGQEDYDR,YGEYFPGTGDLR,TPLTSEQAFYAR,LQNGRPVNVVSK,SKVDVVDGDNWESK,MLDAEEMVNMAKPDER,TIRPDNMSEYTK,ETWLNENQR,SENESESAR,DKVLSSDDYGK,RLAELVK,EMVELPLR,FEAPEALFQ…	lcl|c229132_g1_i4|m.13986,lcl|c242947_g1_i3|m.30437,lcl|c241874_g1_i8|m.29086,lcl|c202129_g1_i1|m.1242,lcl|c232719_g2_i1|m.17712,lcl|c243393_g3_i1|m.30930,lcl|c241874_g1_i8|m.29081,lcl|c241874_g1_i8|m.29082,lcl|c236422_g1_i6|m.22099,lcl|c237457_g1_i3|m.23289,lcl|c243541_g3_i2|m.31058,lcl|c227928_g3_i7|m.12901,lcl|c241105_g3_i3|m.28180,lcl|c234907_g1_i13|m.20400,lcl|c231339_g4_i3|m.16144,lcl|c2223…	lcl|c229132_g1_i4|m.13986,lcl|c242947_g1_i3|m.30437,lcl|c296217_g1_i1|m.32460,lcl|c241874_g1_i8|m.29086,lcl|c202129_g1_i1|m.1242,lcl|c221676_g4_i8|m.7788,lcl|c232224_g3_i2|m.17159,lcl|c232719_g2_i1|m.17712,lcl|c243393_g3_i1|m.30930,lcl|c225197_g1_i5|m.10440,lcl|c223679_g2_i1|m.9304,lcl|c241874_g1_i8|m.29081,lcl|c241874_g1_i8|m.29082,lcl|c221676_g4_i4|m.7786,lcl|c243541_g3_i2|m.31058,lcl|c227928_g…	Q7ZXV3,P54614,Q7ZXV8,Q5R7D3,Q8VHF0,E7F9L8,Q9N1U2,O14786,Q23716,Q8BYC6,Q54UW5,P51113,O15891,P39688,O00159,Q5R9I6,O00160,A5DKH0,Q5ZKU5,Q0IIJ2,P61158,P61157,P59083,P54632,Q9SF16,A1DBH2,Q05036,Q64487,Q40079,P56812,Q40078,Q0III9,P61161,P61160,Q23979,Q9Z142,Q6P9P0,Q23978,Q4QQW4,P27448,Q68FQ0,P27446,Q99JB2,P41753,B0CRJ3,P54409,P54408,Q08773,P18754,A7EK16,Q62083,P13060,P41988,Q6PHN9,Q4QQV8,O73723,Q6P1F6,…	Q7ZXV3,P54614,Q7ZXV8,Q5R7D3,Q8VHF0,E7F9L8,Q9N1U2,Q9DB30,O14786,Q23716,Q8BYC6,Q54UW5,Q68FS3,P51113,O15891,Q69ZX6,P39688,Q9P225,O00159,P37276,Q5R9I6,O00160,A5DKH0,Q5ZKU5,Q0IIJ2,P61158,P61157,P59083,Q8VHE6,P54632,P23098,Q9SF16,A1DBH2,Q9Z136,Q05036,Q64487,Q40079,P56812,Q40078,Q0III9,P61161,P61160,Q21313,Q23979,Q9Z142,Q23978,Q4QQW4,P27448,Q68FQ0,P27446,Q99JB2,P41753,B0CRJ3,Q63164,P54409,P54408,Q08773,…
GO:0030029	biological_process	actin filament-based process	0.0666555	5566	0.0615851	5036	-0.114142	2.6e-05	0.243	0.0599563	0.0552788	-0.117186	1.68e-05	0.157	0.00231	QSVTDSMTR,ENLLTDDLGR,TDKGTYLTAVGTGK,TGAASSSSASSPAVQELR,VFDREGNGQISAAE,QIVPSTENIK,YNPTEVGR,SGQDLLDSGHY,GGADSGFNKVEEK,VFTYWK,ELEYQIK,GQELVDSDHSEK,QEAFLADDNLGDSLDGVEALIR,DHQAELEGAYNELLQLAAAR,DLIDLIAK,QLNEVLDKEDSSSPPEPTPE,HGAGETVIQQGDEGDNF,IMAIVDPNGTGYVTF,DNVTSTTR,VEPTDYKPR,QLNPNTTVK,AAVGYEYK,AGAYDYPSPEWDTVTDEAK,QGFVPAAYVK,IGSSGAPVTDQSEETR,EIPGAYDYK,LMDEAMCSR,IIFTDGSR,EPSEYDILHIQNQK,LTTFELR,SEEDRITEA…	ENLLTDDLGR,TGAASSSSASSPAVQELR,GGADSGFNKVEEK,SGQDLLDSGHY,ILVVGNSK,DHYATPEINEK,DHQAELEGAYNELLQLAAAR,DLIDLIAK,TQDLQEKYDNLK,VEPTDYKPR,IGSSGAPVTDQSEETR,LMDEAMCSR,IIFTDGSR,LTTFELR,SEEDRITEAEKNER,KPQDTGGDNEIEY,TVELALWDTAGQEDYDR,GLYWALGDK,TPLTSEQAFYAR,LQNGRPVNVVSK,MLDAEEMVNMAKPDER,ETWLNENQR,DKVLSSDDYGK,RLAELVK,FEAPEALFQPHLI,KLEDSIQR,INALKDNADR,VKVTEVAYCK,RPISADSAIMNPK,GEWIHPEIDNPEYQPDDAL,LNVDGVSLK,FYEQFG…	lcl|c235052_g1_i3|m.20523,lcl|c242947_g1_i3|m.30437,lcl|c241874_g1_i8|m.29086,lcl|c232719_g2_i1|m.17712,lcl|c226782_g6_i4|m.11783,lcl|c214211_g3_i3|m.3396,lcl|c229592_g3_i11|m.14442,lcl|c226071_g2_i11|m.11178,lcl|c241874_g1_i8|m.29081,lcl|c241874_g1_i8|m.29082,lcl|c226071_g2_i7|m.11182,lcl|c243578_g4_i1|m.31087,lcl|c222307_g1_i1|m.8241,lcl|c229207_g3_i3|m.14046,lcl|c225782_g2_i1|m.10939,lcl|c2426…	lcl|c242947_g1_i3|m.30437,lcl|c241874_g1_i8|m.29086,lcl|c221676_g4_i8|m.7788,lcl|c232719_g2_i1|m.17712,lcl|c227572_g1_i1|m.12593,lcl|c226071_g2_i11|m.11178,lcl|c241874_g1_i8|m.29081,lcl|c241874_g1_i8|m.29082,lcl|c221676_g4_i4|m.7786,lcl|c226071_g2_i7|m.11182,lcl|c224773_g5_i3|m.10121,lcl|c224520_g2_i6|m.9890,lcl|c227927_g4_i1|m.12894,lcl|c242633_g1_i1|m.30058,lcl|c221832_g4_i11|m.7891,lcl|c241874…	Q7ZXV3,Q9JJ19,P54613,P54612,Q54LE6,E7F9L8,Q54V86,F1PRN2,O14786,Q5SYD0,P07751,Q8T6H3,P28693,Q9UBC5,Q8NF91,Q92608,Q3MHJ9,P36179,Q8STF6,P18652,P39688,Q8T6H8,P18653,P18654,O00159,P40792,O00160,A5DKH0,Q4QQT4,P61158,P61157,P36181,Q9LZJ5,P0C605,Q13813,Q12965,Q2RBN7,A1DBH2,Q6BUQ2,A2ASS6,O61998,Q0III9,Q7KHA1,P61161,P61160,P19706,Q23979,Q5XI32,Q23978,P27446,Q9WUD9,P53675,B0CRJ3,Q5T3U5,Q7L576,O35379,A7EK16,…	Q7ZXV3,Q9JJ19,P54613,P54612,Q6V1P9,Q54LE6,E7F9L8,Q54V86,Q9DB30,A5GFW1,P49138,F1PRN2,O14786,Q5SYD0,P07751,Q8T6H3,Q9UBC5,P28693,Q8NF91,Q92608,Q3MHJ9,P36179,P18652,P39688,Q8T6H8,P18653,P18654,O00159,Q8BKG3,P40792,O00160,A5DKH0,Q4QQT4,O61661,P61158,P61157,P36181,Q9LZJ5,P0C605,Q13813,Q12965,A1DBH2,Q2RBN7,Q6BUQ2,A2ASS6,Q0III9,O61998,Q7KHA1,P61161,P61160,P19706,Q5M824,Q23979,Q5XI32,Q23978,P27446,Q9WUD9,…
GO:1902414	biological_process	protein localization to cell junction	0.00587996	491	0.00437797	358	-0.425543	1.95e-05	0.182	0.00529881	0.00393986	-0.427525	1.75e-05	0.163	0.00233	GILETNFNTLQTK,ILAGDKPYITVEELR,LEPLEFQQCLVSLGYDVK,LAVLQDVDSLLLEFAK,YNPTEVGR,MASDLLDWISK,VYGPGLENGLLR,MDELELVHQDVQEAM,ANVVGEWIK,FAIQDINIEESAAK,IMAIVDPNGTGYVTF,ALQFVYSK,DSDGTLNDIQNKLDALR,ILAGDKPYITVEE,ILAGDKPYITVEEL,LGQVESWAQK,AAQELER,AWGNLEASEK,DGSSISSDSDSQK,MLDAEEMVNMAKPDER,LAVLQDVDSLL,VLTINKDNEK,LGNRPAYLPTEGK,MLPWLQDR,MISDINR,SIALTMEGPLEDQLK,VSWEQLLTAIAR,GLLDAAWER,DGLLLWCQR,LDHLAEK,LAVLQDVDSLLL,N…	GILETNFNTLQTK,MISDINR,ILAGDKPYITVEELR,SIALTMEGPLEDQLK,LEPLEFQQCLVSLGYDVK,VSWEQLLTAIAR,DSDGTLNDIQNKLDAL,DDPLGNLNLAFEVADK,MASDLLDWISK,GLLDAAWER,LAVLQDVDSLLLE,MDELELVHQDVQEAM,ANVVGEWIK,FAIQDINIEESAAK,SGGIPALVR,LDHLAEK,IMAIVDPNGTGYVTF,ALQFVYSK,DFEDWLLK,LAVLQDVDSLLL,DSDGTLNDIQNKLDALR,ILAGDKPYITVEE,NINEIENQILT,VDSINER,LGNRPAYLPT,MDLFEISEPNEDLEYR,MLPWLQDRDSDGTLNDIQNK,ILAGDKPYITVEEL,VGQAPDPSK,ALNNSSDAETT…	lcl|c236878_g1_i2|m.22651,lcl|c242839_g1_i1|m.30268,lcl|c241349_g1_i1|m.28471,lcl|c234934_g3_i3|m.20432,lcl|c243788_g1_i5|m.31318	lcl|c236878_g1_i2|m.22651,lcl|c242839_g1_i1|m.30268,lcl|c241349_g1_i1|m.28471,lcl|c234934_g3_i3|m.20432,lcl|c243788_g1_i5|m.31318	A5D7D1,Q08043,Q7TPR4,Q90734,Q9Z1P2,Q2PFV7,P12814,Q29I35,Q0VCX4,Q0III9,L7UZ85,Q02257,P05094,P20111,P55196,O35889,O88990,Q7PKQ5,P18091,Q9JI91,P30998,P26233,Q6P0K8,Q9WU82,Q8NF91,P35609,B6V8E6,P14923,P35224,P35223,P35222,Q02453,Q8WNW3,Q9QXQ0,Q9QZQ1,Q5RCS6,O43707,P18824,Q17GS9,P57780,Q02248,Q3ZC55,F1QGH7,Q3B7N2,Q7QHW5,P21333,Q8SPJ1	A5D7D1,Q08043,Q7TPR4,Q90734,Q9Z1P2,Q2PFV7,P12814,Q29I35,Q0VCX4,Q0III9,L7UZ85,Q02257,P05094,P20111,P55196,O35889,O88990,Q7PKQ5,P18091,Q9JI91,P30998,P26233,Q6P0K8,Q9WU82,Q8NF91,P35609,B6V8E6,P14923,P35224,P35223,P35222,Q02453,Q8WNW3,Q9QXQ0,Q9QZQ1,Q5RCS6,O43707,P18824,Q17GS9,P57780,Q02248,Q3ZC55,F1QGH7,Q3B7N2,Q7QHW5,P21333,Q8SPJ1
GO:0030048	biological_process	actin filament-based movement	0.0088379	738	0.0070072	573	-0.334865	2.73e-05	0.255	0.00795899	0.00629939	-0.337374	2.36e-05	0.22	0.00298	VFDREGNGQISAAE,QIVPSTENIK,EQQIIQLTQK,EGNGQISAAELR,VVSQNPSER,AAAEKEQNDGTR,MDELELVHQDVQEAM,LTAFEPEAR,FAIQDINIEESAAK,GINLSGGQK,DLIDLIAK,IMAIVDPNGTGYVTF,ALQFVYSK,QLNPNTTVK,AGAYDYPSPEWDTVTDEAK,IGSSGAPVTDQSEETR,IESAQLGEVLR,TPLTSEQAFYAR,ISFEEFLPIFLSIGQK,AWGNLEASEK,VFDREGNGQISAAEL,VVEVAPLAQSLNSTDVFLLNNPQAR,MLDAEEMVNMAKPDER,LAVLQDVDSLL,AVNSDLLETR,NFVGDYIGYDDNPALR,KVTEATQK,MLPWLQDR,EGNDKVDESK,DQAFSSDTR,MTD…	DDPLGNLNLAFEVADK,EQQIIQLTQK,EGNGQISAAELR,VVSQNPSER,AAAEKEQNDGTR,MDELELVHQDVQEAM,LTAFEPEAR,FAIQDINIEESAAK,GINLSGGQK,DLIDLIAK,IMAIVDPNGTGYVTF,ALQFVYSK,QLNPNTTVK,IGSSGAPVTDQSEETR,LTQRIGSSGAPVTDQSEETR,DIKPENL,LAIEAPTTPVTVTPDTF,IESAQLGEVLR,TPLTSEQAFYAR,ISFEEFLPIFLSIGQK,LQNGRPVNVVSK,LQLAEEHIESLEQQLAESEK,AWGNLEASEK,VFDREGNGQISAAEL,VVEVAPLAQSLNSTDVFLLNNPQAR,MLDAEEMVNMAKPDER,LAVLQDVDSLL,NFVGDYIGYDDNPALR,K…	lcl|c229592_g3_i11|m.14442,lcl|c226071_g2_i11|m.11178,lcl|c224557_g2_i1|m.9933,lcl|c233339_g2_i12|m.18429,lcl|c236793_g3_i7|m.22527,lcl|c226071_g2_i7|m.11182,lcl|c236793_g3_i7|m.22528,lcl|c211861_g1_i1|m.2554,lcl|c226071_g2_i1|m.11176,lcl|c221194_g2_i1|m.7463,lcl|c236793_g3_i6|m.22526,lcl|c217326_g3_i1|m.5105,lcl|c228653_g2_i5|m.13498,lcl|c243788_g1_i5|m.31318,lcl|c221753_g3_i7|m.7844,lcl|c242868…	lcl|c234064_g1_i4|m.19396,lcl|c234064_g1_i2|m.19394,lcl|c242662_g1_i1|m.30100,lcl|c221676_g4_i8|m.7788,lcl|c229592_g3_i11|m.14442,lcl|c226071_g2_i11|m.11178,lcl|c225854_g1_i4|m.10994,lcl|c236793_g3_i7|m.22527,lcl|c221676_g4_i4|m.7786,lcl|c226071_g2_i7|m.11182,lcl|c224773_g5_i3|m.10121,lcl|c236793_g3_i7|m.22528,lcl|c217583_g2_i1|m.5267,lcl|c226071_g2_i1|m.11176,lcl|c227927_g4_i1|m.12894,lcl|c23728…	Q2US45,Q7FB56,Q7GB25,A7KVC2,O43795,Q54JR2,P32386,Q54LE6,Q8VZZ4,E7F9L8,Q54V86,F1PRN2,Q5SYD0,A8N2Y6,Q8T6H3,P18091,Q9UBC5,Q8NF91,Q3MHJ9,Q8T6H8,Q62774,O00159,Q9QYM0,O88329,O00160,A5DKH0,O88563,Q9LZJ5,P22467,Q12965,A1DBH2,P0CP01,Q6BUQ2,P0CP00,Q0III9,P19706,Q23979,Q23978,B0CRJ3,Q5T3U5,P11798,Q54VJ0,O35379,A7EK16,Q6C7C0,Q864R9,B2RX12,A0A0D1CZ63,L7UZ85,Q9C8G9,Q8CG09,Q6CVE9,P02640,P70170,O94832,Q9UQM7,Q7D…	Q2US45,Q7FB56,Q7GB25,Q15418,A7KVC2,Q54JR2,O43795,P32386,Q54LE6,Q8VZZ4,E7F9L8,Q9DB30,Q54V86,A5GFW1,P49138,F1PRN2,A8N2Y6,Q5SYD0,Q8T6H3,P18091,Q9UBC5,Q8NF91,Q3MHJ9,P18652,P18653,Q8T6H8,P18654,Q62774,O00159,Q9QYM0,O00160,O88329,A5DKH0,O61661,O88563,Q9LZJ5,P22467,P0C605,Q9WUT3,Q12965,A1DBH2,P0CP01,Q6BUQ2,P0CP00,Q0III9,P19706,Q23979,Q23978,Q5R844,B0CRJ3,P51812,Q5T3U5,P11798,P54646,Q54VJ0,O35379,A7EK16,…
GO:0050999	biological_process	regulation of nitric-oxide synthase activity	0.00192805	161	0.00295941	242	0.618167	2.13e-05	0.199	0.00174473	0.00266681	0.612112	2.45e-05	0.229	0.00302	LGIHEDSVNR,VPVGDQPPDIEMLIR,APFDLFENR,EMLQQNK,DYCSEMNADLAK,FYEQFGK,DNSTLGYMAAK,QIAVALCEAISPTGV,DQVSHSAFVEQVK,SLTNDWEEHLAVK,SSVLENFVGR,GMEDLIPIMNK,YHSSASGDEMT,EIVAETDRETGSNK,NTDEITAEEYGEFYK,ITDQRPETASGYWNDLK,AIEGGGDSIDTK,GISSLPINLR,EGLELPEDEEEK,GFEVLYMTEPIDEYAVQQLK,GADFWWSDLSVPVYR,SMAGEIGTLDPQMER,ITSQQENDFVLALAR,IEADKNDK,GVVDSEDLPLNISR,GVVDSEDLPLNIS,ALLFLPR	DIYYITGENK,LGIHEDSVNR,HLEVNPDHSIVET,VGLFTPDMAFEAIVK,APFDLFENR,EMLQQNK,DYCSEMNADLAK,VFIMDNCEDIIPEYLNFIK,FYEQFGK,DNSTLGYMAAK,SLTNDWEEHLAVK,SSVLENFVGR,NTDEITAEEYGEFYK,HLEVNPDHSIVETLR,RAPFDLFENR,YHSSASGDEMTSLK,ITDQRPETASGYWNDLK,HLEVNPDHSIVETL,YHSSASGDEMTSL,AIEGGGDSIDTK,TQEISYTDTK,GFEVLYMTEPIDEYAVQQLK,GADFWWSDLSVPVYR,ITSQQENDFVLALAR,IEADKNDK,GVVDSEDLPLNISR,GVVDSEDLPLNIS,ALLFLPR,EGLELPEDEEEKK	lcl|c239132_g4_i1|m.25330,lcl|c229550_g1_i3|m.14392,lcl|c239132_g4_i2|m.25331,lcl|c239343_g4_i4|m.25612,lcl|c201183_g1_i1|m.1185,lcl|c223266_g1_i3|m.8987	lcl|c227706_g1_i7|m.12694,lcl|c239132_g4_i1|m.25330,lcl|c229550_g1_i3|m.14392,lcl|c239132_g4_i2|m.25331,lcl|c239343_g4_i4|m.25612,lcl|c227706_g1_i4|m.12692,lcl|c201183_g1_i1|m.1185	P07901,P07900,P50570,Q69QQ6,Q07078,Q8BZ98,Q90474,P27323,Q76LV2,Q61W58,Q08877,P11499,P30793,P04809,Q76LV1,O57521,Q9GKX8,P39054,P39053,Q9GKX7,P39055,P39052,P82995,P36181,Q4R4P1,Q4R4T5,P21575,Q05193,O02705,Q5R710,A5A6K9,P30947,P30946,Q9UQ16,P11501,Q7PT10,Q08DF4,O61998,O02192,P02828,A6H7I5,P20693,Q04619,Q9BLC5,P34058,P27619,Q18688,P08238,P46633	P07901,P07900,P50570,Q69QQ6,Q07078,Q8BZ98,Q90474,P27323,Q76LV2,Q91757,Q61W58,Q08877,P11499,P04809,Q76LV1,O57521,Q9GKX8,P39054,P39053,Q9GKX7,P39055,P39052,P49841,P82995,P36181,Q4R4P1,Q4R4T5,P21575,Q05193,O02705,Q5R710,A5A6K9,P30947,P30946,Q9UQ16,P18266,P11501,Q7PT10,Q08DF4,O61998,O02192,P02828,A6H7I5,P20693,Q04619,Q9BLC5,Q9WV60,Q5YJC2,P34058,P27619,Q18688,P08238,P46633
GO:0006865	biological_process	amino acid transport	0.00216756	181	0.00325291	266	0.585657	2.16e-05	0.202	0.00196013	0.0029302	0.580051	2.49e-05	0.232	0.00302	STSIPSSGQK,TAWVDVAPSYL,TPMQWSDESNAGFSSR,DQPDLNLR,YNDNQR,VLISPGSDTVPAGLEIAAR,NTVVEYIDAVPAGK,GIPVTDQDGNR,GLLPQLVGVAPEK,LLIADVEGAR,SFFDSNDDGNGDLSGISK,ASTAIDSPAASNAVGSGK,STQYYDLADIIQNVGLITK,VPNWLIGNIGIAR,YMTPENLIR,GVDDVPLEK,VFNISLAEEPGDNLYET,SSDDGIVSNQPGAR,GDDYAASEPLTGGEAK,LTTNDFVR,EGNGEALPAVEDNK,VILDFVPNHTSK,QADPSQLTIIFNK,NAMNVLQMTLPGIVT,LTLNPGQAVIVSGTSEDWLLS,VLEFWLNK,ISYGYYR,YQSEGNSGEMPK,DFMAIEK,NA…	STSIPSSGQK,YNDNQR,LTLNPGQAVIV,NTVVEYIDAVPAGK,GLLPQLVGVAPEK,GIPVTDQDGNR,ASTAIDSPAASNAVGSGK,VDVNKLTLNPGQAVIV,YMTPENLIR,GVDDVPLEK,VFNISLAEEPGDNLYET,GDDYAASEPLTGGEAK,VILDFVPNHTSK,NAMNVLQMTLPGIVT,IVFQLFDLDGK,YQSEGNSGEMPK,DFMAIEK,TPMQWSDESNAGF,EDTVPMDPIER,EGQQTYR,NAMNVLQMTLPGIVTT,FSTGLLDVLSSPTTR,AVMYQIYPR,RLLIADVEGAR,DQPDLNLR,VLISPGSDTVPAGLEIAAR,SINPDISLHPDHIGGMRLAVASFAGIE,TLDAFLDLVR,LLIADVEGAR,SFFDSND…	lcl|c222253_g5_i4|m.8203,lcl|c229751_g1_i1|m.14591,lcl|c236234_g4_i6|m.21880,lcl|c244441_g1_i1|m.32200,lcl|c236234_g4_i1|m.21876,lcl|c218881_g3_i2|m.6022,lcl|c229751_g1_i2|m.14592,lcl|c239334_g2_i2|m.25606,lcl|c236234_g4_i10|m.21877,lcl|c242504_g2_i2|m.29888,lcl|c236923_g1_i10|m.22692,lcl|c238932_g1_i1|m.25092,lcl|c234322_g7_i1|m.19718,lcl|c214691_g1_i1|m.3614,lcl|c236234_g4_i13|m.21879	lcl|c229751_g1_i1|m.14591,lcl|c236234_g4_i6|m.21880,lcl|c244441_g1_i1|m.32200,lcl|c229784_g1_i1|m.14625,lcl|c218881_g3_i2|m.6022,lcl|c236234_g4_i1|m.21876,lcl|c233929_g2_i1|m.19204,lcl|c222963_g3_i6|m.8757,lcl|c229751_g1_i2|m.14592,lcl|c239334_g2_i2|m.25606,lcl|c222963_g3_i3|m.8754,lcl|c236234_g4_i10|m.21877,lcl|c233719_g1_i10|m.18891,lcl|c242504_g2_i2|m.29888,lcl|c236923_g1_i10|m.22692,lcl|c2343…	Q5RBC8,G3XCN6,O75746,P60879,Q64319,Q9QXX4,Q87NG3,Q9N1R6,A5A761,Q02410,P60881,P60880,Q5R1X1,Q17QQ3,Q9UJS0,Q9Z254,P60878,Q91WV7,P60877,Q8BH59,Q8HXW2,P43006	Q5RBC8,G3XCN6,O16098,O75746,P60879,Q761V0,Q5R6J1,Q9Y345,Q9QXX4,A5A761,Q9UJS0,P60878,Q91WV7,P60877,Q8BH59,Q64319,Q87NG3,Q9N1R6,O57321,Q07837,P60881,P60880,Q5R1X1,Q17QQ3,Q9Z254,Q8HXW2,P43006
GO:0002922	biological_process	positive regulation of humoral immune response	0.000192	16	0.000611	50	1.67408	1.94e-05	0.182	0.000183	0.00056	1.61211	2.65e-05	0.248	0.00318	GADFWWSDLSVPVYR,ITDQRPETASGYWNDLK,ITSQQENDFVLALAR,DYCSEMNADLAK	LGSSQADVGLALGELYGNVFSQ,GADFWWSDLSVPVYR,ITDQRPETASGYWNDLK,ITSQQENDFVLALAR,DYCSEMNADLAK	lcl|c239132_g4_i1|m.25330,lcl|c239132_g4_i2|m.25331	lcl|c200822_g1_i1|m.1155,lcl|c239132_g4_i1|m.25330,lcl|c239132_g4_i2|m.25331	P20693	P16241,P20693
GO:1902396	biological_process	protein localization to bicellular tight junction	0.00574823	480	0.0043046	352	-0.417238	3.38e-05	0.316	0.00518034	0.00387401	-0.419219	3.04e-05	0.284	0.00347	GILETNFNTLQTK,MISDINR,ILAGDKPYITVEELR,SIALTMEGPLEDQLK,LEPLEFQQCLVSLGYDVK,LAVLQDVDSLLLEFAK,VSWEQLLTAIAR,YNPTEVGR,MASDLLDWISK,VYGPGLENGLLR,GLLDAAWER,MDELELVHQDVQEAM,ANVVGEWIK,FAIQDINIEESAAK,DGLLLWCQR,LDHLAEK,IMAIVDPNGTGYVTF,ALQFVYSK,LAVLQDVDSLLL,DSDGTLNDIQNKLDALR,ILAGDKPYITVEE,NINEIENQILT,VDSINER,LGNRPAYLPT,ILAGDKPYITVEEL,VFASGAGLK,VGQAPDPSK,DDPLGNLNLAF,DSDGTLNDIQNK,AAPYNNWLESAR,MMEEYEK,NINEIENQILT…	GILETNFNTLQTK,MISDINR,ILAGDKPYITVEELR,SIALTMEGPLEDQLK,LEPLEFQQCLVSLGYDVK,VSWEQLLTAIAR,DSDGTLNDIQNKLDAL,DDPLGNLNLAFEVADK,MASDLLDWISK,GLLDAAWER,LAVLQDVDSLLLE,MDELELVHQDVQEAM,ANVVGEWIK,FAIQDINIEESAAK,LDHLAEK,IMAIVDPNGTGYVTF,ALQFVYSK,DFEDWLLK,LAVLQDVDSLLL,DSDGTLNDIQNKLDALR,ILAGDKPYITVEE,NINEIENQILT,VDSINER,LGNRPAYLPT,MLPWLQDRDSDGTLNDIQNK,ILAGDKPYITVEEL,VGQAPDPSK,DSDGTLNDIQNK,AAPYNNWLESAR,NINEIENQILTR…	lcl|c236878_g1_i2|m.22651,lcl|c234934_g3_i3|m.20432,lcl|c243788_g1_i5|m.31318	lcl|c236878_g1_i2|m.22651,lcl|c234934_g3_i3|m.20432,lcl|c243788_g1_i5|m.31318	Q7PKQ5,A5D7D1,P18091,Q08043,Q9JI91,Q7TPR4,Q90734,Q9Z1P2,Q8NF91,P35609,Q2PFV7,P12814,Q9QXQ0,Q0III9,Q5RCS6,L7UZ85,O43707,P57780,P05094,P20111,Q3ZC55,Q3B7N2,O88990,P21333	Q7PKQ5,A5D7D1,P18091,Q08043,Q9JI91,Q7TPR4,Q90734,Q9Z1P2,Q8NF91,P35609,Q2PFV7,P12814,Q9QXQ0,Q0III9,Q5RCS6,L7UZ85,O43707,P57780,P05094,P20111,Q3ZC55,Q3B7N2,O88990,P21333
GO:0009266	biological_process	response to temperature stimulus	0.0267891	2237	0.0302667	2475	0.176084	2.16e-05	0.202	0.0241031	0.027173	0.172951	3.1e-05	0.289	0.00349	FITEEAR,GYISPYFINTTK,GVDVWTVNPEDK,LYQGQGGGQGGEGAPTEEEKPE,LPGGSWGPSTVPWTDVR,NSPAIIFIDEIDAIAPK,ASSLPDVDTFGK,KVTESTSK,TQSEVDSQTAAQHAEIMEK,LYQGQGGGQGGEGAPTEEEKPEEAEHDKDEL,EAFDDSIADLDK,YGEYFPGTGDLR,VGLQVAAVK,ALQASALK,SDPFVIIK,GVIIGLTQFTNK,TPTADVLVFDYTK,GGGIETIANEYSDR,VLNDVQDMK,GPELLTMWFGESEANVR,YSQGGSYGSR,MESDDGDDDVPLAVR,EMVELPLR,ITITNDQNR,LNLNSLVDSNK,FYLGGVPEGFNSK,LIAMLSSVFDNLVR,FYEQFGK,TLQDELELIEGMK…	FITEEAR,GYISPYFINTTK,GVDVWTVNPEDK,LYQGQGGGQGGEGAPTEEEKPE,LPGGSWGPSTVPWTDVR,ASSLPDVDTFGK,KVTESTSK,SSILSNDMSSLK,KELEDVVQPIVSK,LYQGQGGGQGGEGAPTEEEKPEEAEHDKDEL,YQFAPDR,EAFDDSIADLDK,YGEYFPGTGDLR,VGLQVAAVK,QSEKPLEILEK,ALQASALK,SDPFVIIK,GVIIGLTQFTNK,TPTADVLVFDYTK,GGGIETIANEYSDR,TIRPDNMSEYTK,ETTVVWDKLTGEPLHNAI,VLNDVQDMK,MESDDGDDDVPLAVR,EMVELPLR,ITITNDQNR,FYLGGVPEGFNSK,LIAMLSSVFDNLVR,FYEQFGK,QDDSEVDEVLVDL…	lcl|c235052_g1_i3|m.20523,lcl|c223357_g4_i3|m.9060,lcl|c235446_g2_i1|m.20934,lcl|c240346_g7_i3|m.27102,lcl|c229561_g1_i2|m.14409,lcl|c232719_g2_i1|m.17712,lcl|c226782_g6_i4|m.11783,lcl|c226071_g2_i11|m.11178,lcl|c236061_g4_i6|m.21634,lcl|c229025_g3_i1|m.13888,lcl|c233948_g1_i2|m.19238,lcl|c226071_g2_i7|m.11182,lcl|c228525_g4_i1|m.13398,lcl|c225632_g3_i1|m.10790,lcl|c238537_g2_i6|m.24628,lcl|c2182…	lcl|c235052_g1_i3|m.20523,lcl|c223357_g4_i3|m.9060,lcl|c235446_g2_i1|m.20934,lcl|c240346_g7_i3|m.27102,lcl|c229561_g1_i2|m.14409,lcl|c232719_g2_i1|m.17712,lcl|c226782_g6_i4|m.11783,lcl|c226071_g2_i11|m.11178,lcl|c236061_g4_i6|m.21634,lcl|c230742_g3_i2|m.15573,lcl|c229025_g3_i1|m.13888,lcl|c233948_g1_i2|m.19238,lcl|c226071_g2_i7|m.11182,lcl|c228525_g4_i1|m.13398,lcl|c220106_g1_i3|m.6753,lcl|c22563…	O93377,A5A6I5,P27112,O73885,Q9TVM2,Q5NVM9,Q54LE6,Q32PJ8,Q5R7D3,Q64392,Q63060,Q9N1U2,Q54V86,Q23716,Q5NVM5,Q8T6H3,P50140,Q05046,Q8T6H8,P36181,Q2TFN9,Q9LZJ5,P10809,P54632,O75923,Q05036,O61998,Q9W7I5,P15112,Q21313,Q4QQW4,P41512,P41753,O14460,Q9PTX2,Q3SWX8,Q5T3U5,Q3MHL3,O35379,P13060,Q6GL04,O17966,O02649,Q969P6,P29691,Q80W83,P54812,P18687,P54811,B2RX12,A0A0D1CZ63,Q9C8G9,Q9TUG3,F1MA98,A0JMA9,Q90473,Q5A…	O93377,A5A6I5,P27112,Q2HJ94,O73885,P20839,Q9TVM2,Q5NVM9,Q54LE6,Q32PJ8,Q5R7D3,Q64392,Q63060,Q9N1U2,Q54V86,Q23716,Q5NVM5,Q8T6H3,P50140,Q05046,Q8T6H8,P36181,Q2TFN9,Q9LZJ5,P10809,P54632,O75923,Q05036,Q3SWY3,O61998,Q9W7I5,P15112,Q21313,Q4QQW4,P41512,P41753,O14460,Q9PTX2,Q3SWX8,Q5T3U5,Q3MHL3,O35379,P13060,Q6GL04,O17966,O02649,Q969P6,P29691,Q80W83,P54812,P18687,P54811,B2RX12,A0A0D1CZ63,Q9C8G9,Q9TUG3,F1M…
GO:0030050	biological_process	vesicle transport along actin filament	0.00593984	496	0.00447581	366	-0.408276	3.61e-05	0.337	0.00535266	0.00402766	-0.410316	3.24e-05	0.303	0.00356	GILETNFNTLQTK,ILAGDKPYITVEELR,LEPLEFQQCLVSLGYDVK,QIVPSTENIK,LAVLQDVDSLLLEFAK,MASDLLDWISK,SEDAFLENLR,MDELELVHQDVQEAM,ANVVGEWIK,FAIQDINIEESAAK,IMAIVDPNGTGYVTF,ALQFVYSK,DSDGTLNDIQNKLDALR,ILAGDKPYITVEE,ILAGDKPYITVEEL,TPLTSEQAFYAR,AAQELER,AWGNLEASEK,MLDAEEMVNMAKPDER,LAVLQDVDSLL,VLTINKDNEK,LGNRPAYLPTEGK,INTSLVNETYR,MLPWLQDR,MISDINR,SIALTMEGPLEDQLK,VSWEQLLTAIAR,GLLDAAWER,LLESNPVLEAFGNAR,DGLLLWCQR,LDHLAE…	GILETNFNTLQTK,ILAGDKPYITVEELR,LEPLEFQQCLVSLGYDVK,DDPLGNLNLAFEVADK,MASDLLDWISK,SEDAFLENLR,MDELELVHQDVQEAM,ANVVGEWIK,FAIQDINIEESAAK,IMAIVDPNGTGYVTF,ALQFVYSK,DSDGTLNDIQNKLDALR,ILAGDKPYITVEE,MLPWLQDRDSDGTLNDIQNK,ILAGDKPYITVEEL,TPLTSEQAFYAR,LQNGRPVNVVSK,AAQELER,AWGNLEASEK,MLDAEEMVNMAKPDER,LAVLQDVDSLL,CQYICDEWAK,VLTINKDNEK,LGNRPAYLPTEGK,INTSLVNETYR,MLPWLQDR,MISDINR,SIALTMEGPLEDQLK,DSDGTLNDIQNKLDAL,VSWE…	lcl|c233339_g2_i12|m.18429,lcl|c234934_g3_i3|m.20432,lcl|c243788_g1_i5|m.31318	lcl|c233339_g2_i12|m.18429,lcl|c234934_g3_i3|m.20432,lcl|c243788_g1_i5|m.31318	Q08043,Q05096,Q2PFV7,O43795,Q5ZLA6,P12814,Q5ZMC2,L7UZ85,P05094,E7F9L8,P20111,F1PRN2,Q5SYD0,Q7PKQ5,P18091,P10568,Q9UBC5,Q8NF91,P35609,O94832,Q62774,O00159,Q5SUA5,Q27966,P57780,O88329,Q9WTI7,Q8N1T3,Q3ZC55,Q92002,Q3B7N2,P46735,A5D7D1,Q7TPR4,Q90734,P34109,Q9Z1P2,A0MP03,Q63355,Q63357,Q0III9,Q23979,Q23978,Q17R14,O88990,Q9JI91,Q6GPA1,Q9QXQ0,Q5RCS6,Q9D6A1,B0I1T2,O43707,A5PF48,P47807,Q03479	Q08043,Q05096,Q2PFV7,O43795,Q5ZLA6,P12814,Q5ZMC2,L7UZ85,P05094,E7F9L8,P20111,F1PRN2,Q5SYD0,Q7PKQ5,P18091,P10568,Q9UBC5,Q8NF91,P35609,O94832,Q62774,O00159,Q5SUA5,Q27966,P57780,O88329,Q9WTI7,Q8N1T3,Q3ZC55,Q92002,Q3B7N2,P46735,A5D7D1,Q7TPR4,Q90734,P34109,Q9Z1P2,A0MP03,Q63355,Q63357,Q0III9,Q23979,Q23978,Q17R14,O88990,Q9JI91,Q6GPA1,Q9QXQ0,Q5RCS6,Q9D6A1,B0I1T2,O43707,A5PF48,P47807,Q03479
GO:0090100	biological_process	positive regulation of transmembrane receptor protein serine/threonine kinase signaling pathway	0.00229929	192	0.00338743	277	0.559	3.21e-05	0.3	0.0020786	0.00305092	0.553634	3.69e-05	0.345	0.00378	DGPSVQSELLTR,LGIHEDSVNR,GVGNPAPEINWIK,VDGYVDPSGGSR,APFDLFENR,EMLQQNK,QASAQQPALGYAPQPGAPPAVVPSVSSSLYPSLV,VDQMAQAQAR,FYEQFGK,DNSTLGYMAAK,DQVSHSAFVEQVK,SLTNDWEEHLAVK,YHSSASGDEMT,ASTAIDSPAASNAVGSGK,AVVPQTSGMVAPVTGDN,NTDEITAEEYGEFYK,IYNSNSVECEEK,AVVPQTSGMVAPVTGDNNFGVR,LSWIQPSEIDLTNK,GVGNPAPEINWIKDGER,TVGNEDLLSFVTK,SPEEVDQR,FLPMNVLFFR,VTWAVPDTGPNSVSR,IESPNWMAPEVLQK,AASSSNVLPVQLDSQGR,EGLELPEDEEEK,GFEVLY…	SLEEHGVDEK,LGIHEDSVNR,HLEVNPDHSIVET,GVGNPAPEINWIK,KPIYPVTSTPR,QDVPNMR,VDGYVDPSGGSR,APFDLFENR,QASAQQPALGYAPQPGAPPAVVPSVSSSLYPSLV,VDQMAQAQAR,VFIMDNCEDIIPEYLNFIK,DNSTLGYMAAK,ASTAIDSPAASNAVGSGK,IYNSNSVECEEK,HLEVNPDHSIVETLR,AEYGAILAR,LSWIQPSEIDLTNK,TEDGTAVDWNR,YHSSASGDEMTSL,TVGNEDLLSFVTK,SPEEVDQR,IESPNWMAPEVLQK,AASSSNVLPVQLDSQGR,FGDQILQIDGETLAGY,GVVDSEDLPLNIS,ALLFLPR,EGLELPEDEEEKK,DIYYITGENK,DGPSVQSEL…	lcl|c230438_g3_i2|m.15311,lcl|c229550_g1_i3|m.14392,lcl|c233478_g1_i2|m.18597,lcl|c231891_g1_i1|m.16759,lcl|c230438_g3_i4|m.15312,lcl|c220963_g1_i2|m.7277,lcl|c220963_g1_i1|m.7276,lcl|c225947_g3_i4|m.11079,lcl|c237693_g4_i5|m.23607,lcl|c241027_g2_i9|m.28096,lcl|c241027_g2_i4|m.28092,lcl|c227548_g2_i4|m.12564,lcl|c241027_g2_i5|m.28094,lcl|c210580_g1_i3|m.2210,lcl|c225947_g3_i1|m.11076,lcl|c214691_…	lcl|c230438_g3_i2|m.15311,lcl|c229550_g1_i3|m.14392,lcl|c231891_g1_i1|m.16759,lcl|c233478_g1_i2|m.18597,lcl|c230438_g3_i4|m.15312,lcl|c220963_g1_i2|m.7277,lcl|c244194_g2_i1|m.31876,lcl|c220963_g1_i1|m.7276,lcl|c225947_g3_i4|m.11079,lcl|c241027_g2_i9|m.28096,lcl|c241027_g2_i4|m.28092,lcl|c227548_g2_i4|m.12564,lcl|c241027_g2_i5|m.28094,lcl|c210580_g1_i3|m.2210,lcl|c224998_g2_i2|m.10292,lcl|c225947_…	Q92859,Q9JLB4,P07901,P07900,A9JRC7,Q9GKQ9,Q69QQ6,Q07078,O89026,Q90474,Q1JQE0,P27323,Q76LV2,Q61W58,P11499,P04809,Q76LV1,O57521,Q9GKX8,Q9GKX7,Q9Z254,P82995,Q8JI28,P36181,Q13573,Q4R4P1,Q4R4T5,O02705,Q5R710,A5A6K9,P30947,P49001,P30946,O00560,P97603,P11501,Q7PT10,O57460,O61998,O02192,P02828,Q6IP91,Q5R7R9,Q04619,Q9BLC5,Q90610,Q9CSN1,Q14318,P34058,Q9Y6N7,Q3SWY2,Q18688,P08238,P46633,Q6P861	Q9JLB4,P07901,P07900,A9JRC7,Q9GKQ9,Q69QQ6,Q07078,Q04999,O89026,Q90474,Q1JQE0,P27323,Q76LV2,Q61W58,P11499,P04809,Q76LV1,O57521,Q9GKX8,Q9GKX7,Q9Z254,P82995,Q8JI28,P36181,Q13573,Q4R4P1,Q4R4T5,O02705,Q5R710,A5A6K9,P30947,P49001,P30946,O00560,P97603,P11501,Q7PT10,O57460,O61998,O02192,P02828,Q6IP91,P17491,Q5R7R9,Q04619,Q9BLC5,Q90610,Q9CSN1,Q14318,P34058,Q9Y6N7,P31266,Q3SWY2,Q18688,P08238,P46633,Q6P861
GO:0014870	biological_process	response to muscle inactivity	0.00577218	482	0.00434129	355	-0.410993	4.18e-05	0.391	0.00520188	0.00390694	-0.412996	3.76e-05	0.352	0.00378	GILETNFNTLQTK,MISDINR,ILAGDKPYITVEELR,SIALTMEGPLEDQLK,LEPLEFQQCLVSLGYDVK,LAVLQDVDSLLLEFAK,VSWEQLLTAIAR,GVSPVSNPELLK,MASDLLDWISK,LLEITQNELEDQEQR,LLQFVTGTSR,ALTSFDLETR,GLLDAAWER,MDELELVHQDVQEAM,ANVVGEWIK,FAIQDINIEESAAK,DGLLLWCQR,LDHLAEK,IMAIVDPNGTGYVTF,ALQFVYSK,LAVLQDVDSLLL,DSDGTLNDIQNKLDALR,ILAGDKPYITVEE,NINEIENQILT,VDSINER,LGNRPAYLPT,ILAGDKPYITVEEL,DDPLGNLNLAF,DSDGTLNDIQNK,AAPYNNWLESAR,MMEEYEK,NI…	GILETNFNTLQTK,MISDINR,ILAGDKPYITVEELR,SIALTMEGPLEDQLK,LEPLEFQQCLVSLGYDVK,VSWEQLLTAIAR,DSDGTLNDIQNKLDAL,GVSPVSNPELLK,DDPLGNLNLAFEVADK,MASDLLDWISK,LLQFVTGTSR,GLLDAAWER,LAVLQDVDSLLLE,MDELELVHQDVQEAM,ANVVGEWIK,FAIQDINIEESAAK,LDHLAEK,IMAIVDPNGTGYVTF,ALQFVYSK,DFEDWLLK,LAVLQDVDSLLL,DSDGTLNDIQNKLDALR,ILAGDKPYITVEE,NINEIENQILT,VDSINER,LGNRPAYLPT,MLPWLQDRDSDGTLNDIQNK,ILAGDKPYITVEEL,DSDGTLNDIQNK,AAPYNNWLESA…	lcl|c234934_g3_i3|m.20432,lcl|c233142_g2_i1|m.18198,lcl|c233142_g2_i4|m.18201,lcl|c243788_g1_i5|m.31318,lcl|c240682_g3_i1|m.27598	lcl|c234934_g3_i3|m.20432,lcl|c233142_g2_i1|m.18198,lcl|c233142_g2_i4|m.18201,lcl|c243788_g1_i5|m.31318	A5D7D1,Q08043,Q62940,Q7TPR4,Q90734,Q9Z1P2,Q2PFV7,P12814,Q0III9,L7UZ85,P05094,Q9VVI3,Q96PU5,P20111,Q8CFI0,O88990,Q7PKQ5,P18091,Q9JI91,Q8NF91,P35609,Q5RBF2,Q9QXQ0,P46935,Q5RCS6,P46934,O43707,P46939,P57780,Q3ZC55,Q3B7N2	A5D7D1,Q08043,Q62940,Q7TPR4,Q90734,Q9Z1P2,Q2PFV7,P12814,Q0III9,L7UZ85,P05094,Q9VVI3,Q96PU5,P20111,Q8CFI0,O88990,Q7PKQ5,P18091,Q9JI91,Q8NF91,P35609,Q5RBF2,Q9QXQ0,P46935,Q5RCS6,P46934,O43707,P57780,Q3ZC55,Q3B7N2
GO:0014877	biological_process	response to muscle inactivity involved in regulation of muscle adaptation	0.00577218	482	0.00434129	355	-0.410993	4.18e-05	0.391	0.00520188	0.00390694	-0.412996	3.76e-05	0.352	0.00378	GILETNFNTLQTK,MISDINR,ILAGDKPYITVEELR,SIALTMEGPLEDQLK,LEPLEFQQCLVSLGYDVK,LAVLQDVDSLLLEFAK,VSWEQLLTAIAR,GVSPVSNPELLK,MASDLLDWISK,LLEITQNELEDQEQR,LLQFVTGTSR,ALTSFDLETR,GLLDAAWER,MDELELVHQDVQEAM,ANVVGEWIK,FAIQDINIEESAAK,DGLLLWCQR,LDHLAEK,IMAIVDPNGTGYVTF,ALQFVYSK,LAVLQDVDSLLL,DSDGTLNDIQNKLDALR,ILAGDKPYITVEE,NINEIENQILT,VDSINER,LGNRPAYLPT,ILAGDKPYITVEEL,DDPLGNLNLAF,DSDGTLNDIQNK,AAPYNNWLESAR,MMEEYEK,NI…	GILETNFNTLQTK,MISDINR,ILAGDKPYITVEELR,SIALTMEGPLEDQLK,LEPLEFQQCLVSLGYDVK,VSWEQLLTAIAR,DSDGTLNDIQNKLDAL,GVSPVSNPELLK,DDPLGNLNLAFEVADK,MASDLLDWISK,LLQFVTGTSR,GLLDAAWER,LAVLQDVDSLLLE,MDELELVHQDVQEAM,ANVVGEWIK,FAIQDINIEESAAK,LDHLAEK,IMAIVDPNGTGYVTF,ALQFVYSK,DFEDWLLK,LAVLQDVDSLLL,DSDGTLNDIQNKLDALR,ILAGDKPYITVEE,NINEIENQILT,VDSINER,LGNRPAYLPT,MLPWLQDRDSDGTLNDIQNK,ILAGDKPYITVEEL,DSDGTLNDIQNK,AAPYNNWLESA…	lcl|c234934_g3_i3|m.20432,lcl|c233142_g2_i1|m.18198,lcl|c233142_g2_i4|m.18201,lcl|c243788_g1_i5|m.31318,lcl|c240682_g3_i1|m.27598	lcl|c234934_g3_i3|m.20432,lcl|c233142_g2_i1|m.18198,lcl|c233142_g2_i4|m.18201,lcl|c243788_g1_i5|m.31318	A5D7D1,Q08043,Q62940,Q7TPR4,Q90734,Q9Z1P2,Q2PFV7,P12814,Q0III9,L7UZ85,P05094,Q9VVI3,Q96PU5,P20111,Q8CFI0,O88990,Q7PKQ5,P18091,Q9JI91,Q8NF91,P35609,Q5RBF2,Q9QXQ0,P46935,Q5RCS6,P46934,O43707,P46939,P57780,Q3ZC55,Q3B7N2	A5D7D1,Q08043,Q62940,Q7TPR4,Q90734,Q9Z1P2,Q2PFV7,P12814,Q0III9,L7UZ85,P05094,Q9VVI3,Q96PU5,P20111,Q8CFI0,O88990,Q7PKQ5,P18091,Q9JI91,Q8NF91,P35609,Q5RBF2,Q9QXQ0,P46935,Q5RCS6,P46934,O43707,P57780,Q3ZC55,Q3B7N2
GO:0014874	biological_process	response to stimulus involved in regulation of muscle adaptation	0.00577218	482	0.00434129	355	-0.410993	4.18e-05	0.391	0.00520188	0.00390694	-0.412996	3.76e-05	0.352	0.00378	GILETNFNTLQTK,MISDINR,ILAGDKPYITVEELR,SIALTMEGPLEDQLK,LEPLEFQQCLVSLGYDVK,LAVLQDVDSLLLEFAK,VSWEQLLTAIAR,GVSPVSNPELLK,MASDLLDWISK,LLEITQNELEDQEQR,LLQFVTGTSR,ALTSFDLETR,GLLDAAWER,MDELELVHQDVQEAM,ANVVGEWIK,FAIQDINIEESAAK,DGLLLWCQR,LDHLAEK,IMAIVDPNGTGYVTF,ALQFVYSK,LAVLQDVDSLLL,DSDGTLNDIQNKLDALR,ILAGDKPYITVEE,NINEIENQILT,VDSINER,LGNRPAYLPT,ILAGDKPYITVEEL,DDPLGNLNLAF,DSDGTLNDIQNK,AAPYNNWLESAR,MMEEYEK,NI…	GILETNFNTLQTK,MISDINR,ILAGDKPYITVEELR,SIALTMEGPLEDQLK,LEPLEFQQCLVSLGYDVK,VSWEQLLTAIAR,DSDGTLNDIQNKLDAL,GVSPVSNPELLK,DDPLGNLNLAFEVADK,MASDLLDWISK,LLQFVTGTSR,GLLDAAWER,LAVLQDVDSLLLE,MDELELVHQDVQEAM,ANVVGEWIK,FAIQDINIEESAAK,LDHLAEK,IMAIVDPNGTGYVTF,ALQFVYSK,DFEDWLLK,LAVLQDVDSLLL,DSDGTLNDIQNKLDALR,ILAGDKPYITVEE,NINEIENQILT,VDSINER,LGNRPAYLPT,MLPWLQDRDSDGTLNDIQNK,ILAGDKPYITVEEL,DSDGTLNDIQNK,AAPYNNWLESA…	lcl|c234934_g3_i3|m.20432,lcl|c233142_g2_i1|m.18198,lcl|c233142_g2_i4|m.18201,lcl|c243788_g1_i5|m.31318,lcl|c240682_g3_i1|m.27598	lcl|c234934_g3_i3|m.20432,lcl|c233142_g2_i1|m.18198,lcl|c233142_g2_i4|m.18201,lcl|c243788_g1_i5|m.31318	A5D7D1,Q08043,Q62940,Q7TPR4,Q90734,Q9Z1P2,Q2PFV7,P12814,Q0III9,L7UZ85,P05094,Q9VVI3,Q96PU5,P20111,Q8CFI0,O88990,Q7PKQ5,P18091,Q9JI91,Q8NF91,P35609,Q5RBF2,Q9QXQ0,P46935,Q5RCS6,P46934,O43707,P46939,P57780,Q3ZC55,Q3B7N2	A5D7D1,Q08043,Q62940,Q7TPR4,Q90734,Q9Z1P2,Q2PFV7,P12814,Q0III9,L7UZ85,P05094,Q9VVI3,Q96PU5,P20111,Q8CFI0,O88990,Q7PKQ5,P18091,Q9JI91,Q8NF91,P35609,Q5RBF2,Q9QXQ0,P46935,Q5RCS6,P46934,O43707,P57780,Q3ZC55,Q3B7N2
GO:0014894	biological_process	response to denervation involved in regulation of muscle adaptation	0.00577218	482	0.00434129	355	-0.410993	4.18e-05	0.391	0.00520188	0.00390694	-0.412996	3.76e-05	0.352	0.00378	GILETNFNTLQTK,MISDINR,ILAGDKPYITVEELR,SIALTMEGPLEDQLK,LEPLEFQQCLVSLGYDVK,LAVLQDVDSLLLEFAK,VSWEQLLTAIAR,GVSPVSNPELLK,MASDLLDWISK,LLEITQNELEDQEQR,LLQFVTGTSR,ALTSFDLETR,GLLDAAWER,MDELELVHQDVQEAM,ANVVGEWIK,FAIQDINIEESAAK,DGLLLWCQR,LDHLAEK,IMAIVDPNGTGYVTF,ALQFVYSK,LAVLQDVDSLLL,DSDGTLNDIQNKLDALR,ILAGDKPYITVEE,NINEIENQILT,VDSINER,LGNRPAYLPT,ILAGDKPYITVEEL,DDPLGNLNLAF,DSDGTLNDIQNK,AAPYNNWLESAR,MMEEYEK,NI…	GILETNFNTLQTK,MISDINR,ILAGDKPYITVEELR,SIALTMEGPLEDQLK,LEPLEFQQCLVSLGYDVK,VSWEQLLTAIAR,DSDGTLNDIQNKLDAL,GVSPVSNPELLK,DDPLGNLNLAFEVADK,MASDLLDWISK,LLQFVTGTSR,GLLDAAWER,LAVLQDVDSLLLE,MDELELVHQDVQEAM,ANVVGEWIK,FAIQDINIEESAAK,LDHLAEK,IMAIVDPNGTGYVTF,ALQFVYSK,DFEDWLLK,LAVLQDVDSLLL,DSDGTLNDIQNKLDALR,ILAGDKPYITVEE,NINEIENQILT,VDSINER,LGNRPAYLPT,MLPWLQDRDSDGTLNDIQNK,ILAGDKPYITVEEL,DSDGTLNDIQNK,AAPYNNWLESA…	lcl|c234934_g3_i3|m.20432,lcl|c233142_g2_i1|m.18198,lcl|c233142_g2_i4|m.18201,lcl|c243788_g1_i5|m.31318,lcl|c240682_g3_i1|m.27598	lcl|c234934_g3_i3|m.20432,lcl|c233142_g2_i1|m.18198,lcl|c233142_g2_i4|m.18201,lcl|c243788_g1_i5|m.31318	A5D7D1,Q08043,Q62940,Q7TPR4,Q90734,Q9Z1P2,Q2PFV7,P12814,Q0III9,L7UZ85,P05094,Q9VVI3,Q96PU5,P20111,Q8CFI0,O88990,Q7PKQ5,P18091,Q9JI91,Q8NF91,P35609,Q5RBF2,Q9QXQ0,P46935,Q5RCS6,P46934,O43707,P46939,P57780,Q3ZC55,Q3B7N2	A5D7D1,Q08043,Q62940,Q7TPR4,Q90734,Q9Z1P2,Q2PFV7,P12814,Q0III9,L7UZ85,P05094,Q9VVI3,Q96PU5,P20111,Q8CFI0,O88990,Q7PKQ5,P18091,Q9JI91,Q8NF91,P35609,Q5RBF2,Q9QXQ0,P46935,Q5RCS6,P46934,O43707,P57780,Q3ZC55,Q3B7N2
GO:1902307	biological_process	positive regulation of sodium ion transmembrane transport	0.00585601	489	0.00441466	361	-0.407615	4.21e-05	0.393	0.00527727	0.00397278	-0.409642	3.78e-05	0.354	0.00378	GILETNFNTLQTK,ILAGDKPYITVEELR,LEPLEFQQCLVSLGYDVK,VPVGDQPPDIEMLIR,LAVLQDVDSLLLEFAK,MASDLLDWISK,MDELELVHQDVQEAM,ANVVGEWIK,FAIQDINIEESAAK,GMEDLIPIMNK,EIVAETDRETGSNK,IMAIVDPNGTGYVTF,ALQFVYSK,DSDGTLNDIQNKLDALR,ILAGDKPYITVEE,ILAGDKPYITVEEL,AIEGGGDSIDTK,AAQELER,AWGNLEASEK,SMAGEIGTLDPQMER,MLDAEEMVNMAKPDER,LAVLQDVDSLL,VLTINKDNEK,LGNRPAYLPTEGK,MLPWLQDR,MISDINR,SIALTMEGPLEDQLK,VSWEQLLTAIAR,GLLDAAWER,ASTLLQE…	GILETNFNTLQTK,MISDINR,ILAGDKPYITVEELR,SIALTMEGPLEDQLK,LEPLEFQQCLVSLGYDVK,VSWEQLLTAIAR,DSDGTLNDIQNKLDAL,VGLFTPDMAFEAIVK,DDPLGNLNLAFEVADK,MASDLLDWISK,GLLDAAWER,LAVLQDVDSLLLE,ASTLLQEEDIEELQNETGFSPNQIR,MDELELVHQDVQEAM,SSVLENFVGR,ANVVGEWIK,FAIQDINIEESAAK,LDHLAEK,IMAIVDPNGTGYVTF,ALQFVYSK,DFEDWLLK,LAVLQDVDSLLL,DSDGTLNDIQNKLDALR,ILAGDKPYITVEE,NINEIENQILT,VDSINER,LGNRPAYLPT,MLPWLQDRDSDGTLNDIQNK,ILAGDKPYIT…	lcl|c234934_g3_i3|m.20432,lcl|c239343_g4_i4|m.25612,lcl|c241047_g4_i1|m.28118,lcl|c243788_g1_i5|m.31318	lcl|c234934_g3_i3|m.20432,lcl|c239343_g4_i4|m.25612,lcl|c241047_g4_i1|m.28118,lcl|c243788_g1_i5|m.31318	Q05193,A5D7D1,Q08043,Q7TPR4,Q90734,Q9Z1P2,Q2PFV7,P50570,P12814,Q9UQ16,Q08DF4,Q0III9,L7UZ85,Q8BZ98,P61023,A6H7I5,P61022,P05094,P20111,O88990,Q7PKQ5,P18091,Q9JI91,Q8NF91,P35609,Q08877,Q9QXQ0,Q5RCS6,O43707,P39054,P57780,P39053,P27619,P39055,Q3ZC55,P39052,Q3B7N2,P21575	Q05193,A5D7D1,Q08043,Q7TPR4,Q90734,Q9Z1P2,Q2PFV7,P50570,P12814,Q9UQ16,Q08DF4,Q0III9,L7UZ85,Q8BZ98,P61023,A6H7I5,P61022,P05094,P20111,O88990,Q7PKQ5,P18091,Q9JI91,Q8NF91,P35609,Q08877,Q9QXQ0,Q5RCS6,O43707,P39054,P57780,P39053,P27619,P39055,Q3ZC55,P39052,Q3B7N2,P21575
GO:0002923	biological_process	regulation of humoral immune response mediated by circulating immunoglobulin	0.000192	16	0.000599	49	1.64493	2.93e-05	0.274	0.000183	0.000549	1.58354	3.96e-05	0.371	0.00378	GADFWWSDLSVPVYR,ITDQRPETASGYWNDLK,ITSQQENDFVLALAR,DYCSEMNADLAK	GADFWWSDLSVPVYR,ITDQRPETASGYWNDLK,ITSQQENDFVLALAR,DYCSEMNADLAK	lcl|c239132_g4_i1|m.25330,lcl|c239132_g4_i2|m.25331	lcl|c239132_g4_i1|m.25330,lcl|c239132_g4_i2|m.25331	P20693	P20693
GO:0002925	biological_process	positive regulation of humoral immune response mediated by circulating immunoglobulin	0.000192	16	0.000599	49	1.64493	2.93e-05	0.274	0.000183	0.000549	1.58354	3.96e-05	0.371	0.00378	GADFWWSDLSVPVYR,ITDQRPETASGYWNDLK,ITSQQENDFVLALAR,DYCSEMNADLAK	GADFWWSDLSVPVYR,ITDQRPETASGYWNDLK,ITSQQENDFVLALAR,DYCSEMNADLAK	lcl|c239132_g4_i1|m.25330,lcl|c239132_g4_i2|m.25331	lcl|c239132_g4_i1|m.25330,lcl|c239132_g4_i2|m.25331	P20693	P20693
GO:0043462	biological_process	regulation of ATPase activity	0.00664639	555	0.00511171	418	-0.378764	4.55e-05	0.425	0.00598809	0.00459833	-0.380985	4.05e-05	0.378	0.00381	GILETNFNTLQTK,ILAGDKPYITVEELR,LEPLEFQQCLVSLGYDVK,VPVGDQPPDIEMLIR,LAVLQDVDSLLLEFAK,MASDLLDWISK,ISKDEIEELVT,MDELELVHQDVQEAM,ANVVGEWIK,FAIQDINIEESAAK,GMEDLIPIMNK,EIVAETDRETGSNK,QGSEQEVR,GMTTSNNLLGK,IMAIVDPNGTGYVTF,ALQFVYSK,DSDGTLNDIQNKLDALR,ILAGDKPYITVEE,LLMAVAHQSK,EVDEVVLVGGSTR,ILAGDKPYITVEEL,AIEGGGDSIDTK,LSKDDIDR,AAQELER,AWGNLEASEK,TATDQDIKK,SMAGEIGTLDPQMER,MLDAEEMVNMAKPDER,LAVLQDVDSLL,VLTINKDNEK,…	GILETNFNTLQTK,ILAGDKPYITVEELR,LEPLEFQQCLVSLGYDVK,DDPLGNLNLAFEVADK,MASDLLDWISK,ISKDEIEELVT,MDELELVHQDVQEAM,ANVVGEWIK,FAIQDINIEESAAK,QGSEQEVR,IMAIVDPNGTGYVTF,ALQFVYSK,DSDGTLNDIQNKLDALR,ILAGDKPYITVEE,LLMAVAHQSK,MLPWLQDRDSDGTLNDIQNK,ILAGDKPYITVEEL,AIEGGGDSIDTK,AAQELER,AWGNLEASEK,TATDQDIKK,VSLEDLYNGTTR,MLDAEEMVNMAKPDER,LAVLQDVDSLL,CQYICDEWAK,VLTINKDNEK,LGNRPAYLPTEGK,MLPWLQDR,LADVETVVSNK,MISDINR,SIALTM…	lcl|c231881_g1_i2|m.16748,lcl|c230276_g3_i6|m.15113,lcl|c221540_g4_i1|m.7721,lcl|c234934_g3_i3|m.20432,lcl|c239343_g4_i4|m.25612,lcl|c224691_g5_i2|m.10067,lcl|c230276_g3_i1|m.15112,lcl|c243788_g1_i5|m.31318,lcl|c213147_g4_i1|m.2980	lcl|c226269_g1_i4|m.11346,lcl|c230276_g3_i1|m.15112,lcl|c237102_g8_i1|m.22917,lcl|c226269_g1_i6|m.11347,lcl|c243788_g1_i5|m.31318,lcl|c230742_g3_i2|m.15573,lcl|c231881_g1_i2|m.16748,lcl|c230276_g3_i6|m.15113,lcl|c242300_g2_i1|m.29629,lcl|c230742_g3_i4|m.15574,lcl|c234934_g3_i3|m.20432,lcl|c239343_g4_i4|m.25612,lcl|c213147_g4_i1|m.2980	Q08043,O95433,P12814,O73885,Q5NVM9,Q5R7D3,Q4R888,P17156,Q9N1U2,Q7YQC6,P25686,P26413,Q7PKQ5,P18091,P48442,Q8NF91,Q28222,P16627,Q9U639,Q01877,P39054,P39053,A2Q0Z1,P39055,P39052,Q91233,P08418,P11147,P14659,Q9UQ16,Q0III9,P22954,Q24789,Q05944,P22953,P41753,P34933,P34931,P34930,Q04967,Q5RCS6,O65719,Q6S4N2,O43707,Q91291,P27619,P24629,Q9I8F9,P55063,Q9W6Y1,P22202,P0DMV8,P54652,P0DMV9,Q2PFV7,P50570,P19378,…	Q08043,Q2HJ94,O73885,P12814,Q5NVM9,Q5R7D3,Q4R888,P17156,Q9N1U2,Q7YQC6,P25686,P26413,Q7PKQ5,P18091,Q8NF91,Q28222,P16627,Q9U639,Q01877,P39054,P39053,A2Q0Z1,P39055,P39052,Q91233,P08418,Q9Z136,P11147,P14659,Q9UQ16,Q0III9,P22954,Q24789,Q05944,P22953,P41753,P34933,P34931,P34930,Q04967,O65719,Q5RCS6,Q6S4N2,Q91291,O43707,P24629,Q9I8F9,P27619,P55063,Q9W6Y1,P22202,P0DMV8,P54652,P0DMV9,Q2PFV7,P50570,P19378,…
GO:0048548	biological_process	regulation of pinocytosis	0.00573625	479	0.00431683	353	-0.410137	4.57e-05	0.427	0.00516957	0.00388499	-0.412135	4.12e-05	0.385	0.00381	GILETNFNTLQTK,MISDINR,ILAGDKPYITVEELR,SIALTMEGPLEDQLK,LEPLEFQQCLVSLGYDVK,LAVLQDVDSLLLEFAK,VSWEQLLTAIAR,MASDLLDWISK,GLLDAAWER,NGYNALGFSQGGQFFR,MDELELVHQDVQEAM,ANVVGEWIK,FAIQDINIEESAAK,DGLLLWCQR,EPGAAEQFDSK,LDHLAEK,IMAIVDPNGTGYVTF,ALQFVYSK,LAVLQDVDSLLL,DSDGTLNDIQNKLDALR,ILAGDKPYITVEE,NINEIENQILT,VDSINER,LGNRPAYLPT,ILAGDKPYITVEEL,DDPLGNLNLAF,DSDGTLNDIQNK,AAPYNNWLESAR,MMEEYEK,NINEIENQILTR,MAPYEGPDAVP…	GILETNFNTLQTK,MISDINR,ILAGDKPYITVEELR,SIALTMEGPLEDQLK,LEPLEFQQCLVSLGYDVK,VSWEQLLTAIAR,DSDGTLNDIQNKLDAL,DDPLGNLNLAFEVADK,MASDLLDWISK,GLLDAAWER,NGYNALGFSQGGQFFR,LAVLQDVDSLLLE,MDELELVHQDVQEAM,ANVVGEWIK,FAIQDINIEESAAK,LDHLAEK,IMAIVDPNGTGYVTF,ALQFVYSK,DFEDWLLK,LAVLQDVDSLLL,DSDGTLNDIQNKLDALR,ILAGDKPYITVEE,NINEIENQILT,VDSINER,LGNRPAYLPT,MLPWLQDRDSDGTLNDIQNK,ILAGDKPYITVEEL,DSDGTLNDIQNK,AAPYNNWLESAR,NINEI…	lcl|c232804_g4_i5|m.17788,lcl|c234934_g3_i3|m.20432,lcl|c243788_g1_i5|m.31318,lcl|c215321_g8_i1|m.3945	lcl|c232804_g4_i5|m.17788,lcl|c234934_g3_i3|m.20432,lcl|c243788_g1_i5|m.31318,lcl|c229942_g1_i1|m.14798	A5D7D1,Q08043,Q7TPR4,Q90734,Q9Z1P2,Q2PFV7,P12814,Q9P2R3,Q0III9,L7UZ85,P05094,P20111,O88990,Q7PKQ5,P18091,Q9JI91,Q8NF91,P35609,Q9QXQ0,Q5RCS6,O43707,P57780,Q8HXW6,Q3ZC55,Q3B7N2,Q810B6	A5D7D1,Q08043,Q7TPR4,Q90734,Q9Z1P2,Q2PFV7,P12814,Q0III9,L7UZ85,P05094,P20111,O88990,Q7PKQ5,P18091,Q9JI91,Q8NF91,P35609,Q9QXQ0,Q5RCS6,O43707,P57780,Q8HXW6,Q3ZC55,Q3B7N2,Q810B6
GO:0048549	biological_process	positive regulation of pinocytosis	0.00573625	479	0.00431683	353	-0.410137	4.57e-05	0.427	0.00516957	0.00388499	-0.412135	4.12e-05	0.385	0.00381	GILETNFNTLQTK,MISDINR,ILAGDKPYITVEELR,SIALTMEGPLEDQLK,LEPLEFQQCLVSLGYDVK,LAVLQDVDSLLLEFAK,VSWEQLLTAIAR,MASDLLDWISK,GLLDAAWER,NGYNALGFSQGGQFFR,MDELELVHQDVQEAM,ANVVGEWIK,FAIQDINIEESAAK,DGLLLWCQR,EPGAAEQFDSK,LDHLAEK,IMAIVDPNGTGYVTF,ALQFVYSK,LAVLQDVDSLLL,DSDGTLNDIQNKLDALR,ILAGDKPYITVEE,NINEIENQILT,VDSINER,LGNRPAYLPT,ILAGDKPYITVEEL,DDPLGNLNLAF,DSDGTLNDIQNK,AAPYNNWLESAR,MMEEYEK,NINEIENQILTR,MAPYEGPDAVP…	GILETNFNTLQTK,MISDINR,ILAGDKPYITVEELR,SIALTMEGPLEDQLK,LEPLEFQQCLVSLGYDVK,VSWEQLLTAIAR,DSDGTLNDIQNKLDAL,DDPLGNLNLAFEVADK,MASDLLDWISK,GLLDAAWER,NGYNALGFSQGGQFFR,LAVLQDVDSLLLE,MDELELVHQDVQEAM,ANVVGEWIK,FAIQDINIEESAAK,LDHLAEK,IMAIVDPNGTGYVTF,ALQFVYSK,DFEDWLLK,LAVLQDVDSLLL,DSDGTLNDIQNKLDALR,ILAGDKPYITVEE,NINEIENQILT,VDSINER,LGNRPAYLPT,MLPWLQDRDSDGTLNDIQNK,ILAGDKPYITVEEL,DSDGTLNDIQNK,AAPYNNWLESAR,NINEI…	lcl|c232804_g4_i5|m.17788,lcl|c234934_g3_i3|m.20432,lcl|c243788_g1_i5|m.31318,lcl|c215321_g8_i1|m.3945	lcl|c232804_g4_i5|m.17788,lcl|c234934_g3_i3|m.20432,lcl|c243788_g1_i5|m.31318,lcl|c229942_g1_i1|m.14798	A5D7D1,Q08043,Q7TPR4,Q90734,Q9Z1P2,Q2PFV7,P12814,Q9P2R3,Q0III9,L7UZ85,P05094,P20111,O88990,Q7PKQ5,P18091,Q9JI91,Q8NF91,P35609,Q9QXQ0,Q5RCS6,O43707,P57780,Q8HXW6,Q3ZC55,Q3B7N2,Q810B6	A5D7D1,Q08043,Q7TPR4,Q90734,Q9Z1P2,Q2PFV7,P12814,Q0III9,L7UZ85,P05094,P20111,O88990,Q7PKQ5,P18091,Q9JI91,Q8NF91,P35609,Q9QXQ0,Q5RCS6,O43707,P57780,Q8HXW6,Q3ZC55,Q3B7N2,Q810B6
GO:2000009	biological_process	negative regulation of protein localization to cell surface	0.00583206	487	0.00440243	360	-0.405704	4.71e-05	0.44	0.00525573	0.00396181	-0.407733	4.24e-05	0.396	0.00388	GILETNFNTLQTK,ILAGDKPYITVEELR,LEPLEFQQCLVSLGYDVK,LAVLQDVDSLLLEFAK,GVSPVSNPELLK,MASDLLDWISK,ALTSFDLETR,MDELELVHQDVQEAM,ANVVGEWIK,FAIQDINIEESAAK,IMAIVDPNGTGYVTF,ALQFVYSK,ILMLGLDAAGK,DSDGTLNDIQNKLDALR,ILAGDKPYITVEE,ILAGDKPYITVEEL,AAQELER,AWGNLEASEK,MLDAEEMVNMAKPDER,LAVLQDVDSLL,VLTINKDNEK,NNLLLDSYR,LGNRPAYLPTEGK,MLPWLQDR,MISDINR,SIALTMEGPLEDQLK,VSWEQLLTAIAR,LEPLIQVPSESR,LLQFVTGTSR,GLLDAAWER,DGLLLWCQR…	GILETNFNTLQTK,ILAGDKPYITVEELR,LEPLEFQQCLVSLGYDVK,GVSPVSNPELLK,DDPLGNLNLAFEVADK,MASDLLDWISK,MDELELVHQDVQEAM,ANVVGEWIK,FAIQDINIEESAAK,IMAIVDPNGTGYVTF,ALQFVYSK,DSDGTLNDIQNKLDALR,ILAGDKPYITVEE,MLPWLQDRDSDGTLNDIQNK,ILAGDKPYITVEEL,SANPAPGGTR,AAQELER,AWGNLEASEK,MLDAEEMVNMAKPDER,LAVLQDVDSLL,CQYICDEWAK,VLTINKDNEK,NNLLLDSYR,LGNRPAYLPTEGK,MLPWLQDR,MISDINR,SIALTMEGPLEDQLK,DSDGTLNDIQNKLDAL,VSWEQLLTAIAR,LLQFVT…	lcl|c232684_g7_i4|m.17671,lcl|c234934_g3_i3|m.20432,lcl|c233142_g2_i1|m.18198,lcl|c238872_g6_i2|m.25038,lcl|c214189_g1_i1|m.3388,lcl|c233142_g2_i4|m.18201,lcl|c243788_g1_i5|m.31318	lcl|c234934_g3_i3|m.20432,lcl|c233142_g2_i1|m.18198,lcl|c169738_g3_i3|m.504,lcl|c169738_g3_i1|m.502,lcl|c238872_g6_i2|m.25038,lcl|c214189_g1_i1|m.3388,lcl|c233142_g2_i4|m.18201,lcl|c243788_g1_i5|m.31318,lcl|c169738_g3_i2|m.503	A5D7D1,Q08043,Q62940,Q7TPR4,Q90734,Q9Z1P2,Q2PFV7,P12814,Q0III9,P62330,P62331,L7UZ85,P62332,Q007T5,P05094,Q9VVI3,Q96PU5,P20111,Q8CFI0,O88990,Q7PKQ5,P18091,Q9JI91,P26990,Q8NF91,P35609,Q5RBF2,Q8BH60,Q9QXQ0,P46935,Q5RCS6,P46934,O43707,P57780,Q3ZC55,Q3B7N2	A5D7D1,Q08043,Q62940,Q7TPR4,Q90734,Q9Z1P2,Q2PFV7,P12814,Q0III9,P62330,P62331,L7UZ85,P62332,Q007T5,P05094,Q9VVI3,Q96PU5,P20111,O17798,Q8CFI0,O88990,Q7PKQ5,P18091,Q9JI91,P26990,Q8NF91,P35609,Q5RBF2,Q9QXQ0,P46935,Q5RCS6,P46934,O43707,P57780,Q3ZC55,Q3B7N2
GO:0000387	biological_process	spliceosomal snRNP assembly	0.00134125	112	0.00218899	179	0.706682	3.95e-05	0.37	0.001217	0.00197542	0.698824	4.53e-05	0.423	0.00407	FLILPDMLK,GGGQVIPTAR,ITDVYIPLDYYTR,SLPVEEQPK,DTEQVIATLK,QQLQTAR,EQEEFNTGPLSVLTQSVK,LFNLEDESAEPDLLK,EMWTETPK,YFILPESLPLDTLLVDDAPK,SEMTPEELTQR,VLGLVLLR,VSQLEQVFIR,EQSQLTATTTR,YSRPPNSSLYVR,ATLLTAER,CTLQDGR,VPEDLSSVDEIR,AATGAADFSAK,YIAENGTDPISGEPISEDQLIDIK,QQIAEIEK,YVQLPAEEVDTSLLQDATR,VITGGLDK	NNTQVLINCR,SLPVEEQPK,EMWTETPK,GFAYVQFEDIR,SEMTPEELTQR,SFIGTFLAFDK,VSQLEQVFIR,EQSQLTATTTR,YIAENGTDPISGEPISEDQLIDIK,QQIAEIEK,YVQLPAEEVDTSLLQDATR,DAEDAHYYLDR,FLILPDMLK,GGGQVIPTAR,APEREEK,ITDVYIPLDYYTR,ILGENYTIEDEEDSR,IVDFSPDGK,QQLQTAR,EQEEFNTGPLSVLTQSVK,YFILPESLPLDTLLVDDAPK,VLGLVLLR,ATLLTAER,VPEDLSSVDEIR,VITGGLDK	lcl|c222909_g1_i1|m.8698,lcl|c224456_g4_i3|m.9819,lcl|c222909_g1_i2|m.8699,lcl|c237851_g2_i1|m.23817,lcl|c214539_g3_i1|m.3522,lcl|c236120_g2_i1|m.21731,lcl|c211774_g2_i3|m.2539,lcl|c211774_g2_i1|m.2538,lcl|c218495_g1_i2|m.5815,lcl|c230032_g6_i1|m.14874,lcl|c237851_g2_i4|m.23820,lcl|c218043_g2_i3|m.5510,lcl|c242594_g2_i1|m.30002	lcl|c222909_g1_i1|m.8698,lcl|c224456_g4_i3|m.9819,lcl|c222909_g1_i2|m.8699,lcl|c237851_g2_i1|m.23817,lcl|c214539_g3_i1|m.3522,lcl|c236120_g2_i1|m.21731,lcl|c211774_g2_i3|m.2539,lcl|c211774_g2_i1|m.2538,lcl|c218495_g1_i2|m.5815,lcl|c230032_g6_i1|m.14874,lcl|c237851_g2_i4|m.23820,lcl|c218043_g2_i3|m.5510,lcl|c242594_g2_i1|m.30002	Q5ZMA2,Q08E38,P29691,Q5F3X4,Q5R8Z3,Q3SYU2,Q9JMJ4,P33334,P34369,Q9SSD2,Q9N1Q0,F4JWP9,Q99KP6,P05197,P62318,Q23716,Q5ZL33,Q96X45,O35900,P62314,P62315,Q15029,Q9UMS4,Q9LNC5,O94316,P13639,Q8WXF0,Q90705,Q9Y333,O14187,A0SXL6,O08810,Q4R5F6,Q99PV0,P62320,Q9T0I6,P58252,Q8T295,P13060,O14036,A4FUD3,Q6P2Q9,Q5R6E0,Q3ZC10,P62323,P09445	Q5ZMA2,Q08E38,P29691,Q5F3X4,Q5R8Z3,Q3SYU2,Q9JMJ4,P33334,P34369,Q9SSD2,Q9N1Q0,F4JWP9,Q99KP6,P05197,P62318,Q23716,Q5ZL33,Q96X45,O35900,P62314,P62315,Q15029,Q9UMS4,Q9LNC5,O94316,P13639,Q8WXF0,Q90705,Q9Y333,O14187,A0SXL6,O08810,Q4R5F6,Q99PV0,P62320,Q9T0I6,P58252,Q8T295,P13060,O14036,A4FUD3,Q6P2Q9,Q5R6E0,Q3ZC10,P62323,P09445
GO:0048643	biological_process	positive regulation of skeletal muscle tissue development	0.00580811	485	0.0043902	359	-0.40378	5.27e-05	0.492	0.00523419	0.00395083	-0.40581	4.75e-05	0.444	0.00422	VVTGQLQPNR,GILETNFNTLQTK,MISDINR,ILAGDKPYITVEELR,SIALTMEGPLEDQLK,LEPLEFQQCLVSLGYDVK,LAVLQDVDSLLLEFAK,VSWEQLLTAIAR,MASDLLDWISK,GLLDAAWER,MDELELVHQDVQEAM,ANVVGEWIK,FAIQDINIEESAAK,DGLLLWCQR,LDHLAEK,IMAIVDPNGTGYVTF,ALQFVYSK,LAVLQDVDSLLL,DSDGTLNDIQNKLDALR,ILAGDKPYITVEE,NINEIENQILT,VDSINER,LGNRPAYLPT,ILAGDKPYITVEEL,FGGIEALVR,DDPLGNLNLAF,ALNNSSDAETTR,DSDGTLNDIQNK,AAPYNNWLESAR,MMEEYEK,NINEIENQILTR,MAPYEG…	VVTGQLQPNR,GILETNFNTLQTK,MISDINR,ILAGDKPYITVEELR,SIALTMEGPLEDQLK,LEPLEFQQCLVSLGYDVK,VSWEQLLTAIAR,DSDGTLNDIQNKLDAL,DDPLGNLNLAFEVADK,MASDLLDWISK,GLLDAAWER,LAVLQDVDSLLLE,MDELELVHQDVQEAM,ANVVGEWIK,FAIQDINIEESAAK,SGGIPALVR,LDHLAEK,IMAIVDPNGTGYVTF,ALQFVYSK,DFEDWLLK,LAVLQDVDSLLL,DSDGTLNDIQNKLDALR,ILAGDKPYITVEE,NINEIENQILT,VDSINER,LGNRPAYLPT,MLPWLQDRDSDGTLNDIQNK,ILAGDKPYITVEEL,ALNNSSDAETTR,DSDGTLNDIQNK,A…	lcl|c241349_g1_i1|m.28471,lcl|c234934_g3_i3|m.20432,lcl|c217198_g5_i5|m.5024,lcl|c243788_g1_i5|m.31318	lcl|c241349_g1_i1|m.28471,lcl|c234934_g3_i3|m.20432,lcl|c217198_g5_i5|m.5024,lcl|c243788_g1_i5|m.31318	A5D7D1,Q08043,Q7TPR4,Q90734,Q9Z1P2,Q2PFV7,P12814,Q29I35,Q0VCX4,Q0III9,L7UZ85,Q02257,P05094,P20111,O88990,Q7PKQ5,P18091,Q9JI91,P30998,P26233,Q6P0K8,Q9WU82,Q8NF91,P35609,B6V8E6,P14923,P35224,P35223,P35222,Q02453,Q8WNW3,Q9QXQ0,Q5RCS6,O43707,P18824,Q17GS9,P57780,A4UTP7,Q02248,Q3ZC55,F1QGH7,Q3B7N2,Q7QHW5,Q8SPJ1	A5D7D1,Q08043,Q7TPR4,Q90734,Q9Z1P2,Q2PFV7,P12814,Q29I35,Q0VCX4,Q0III9,L7UZ85,Q02257,P05094,P20111,O88990,Q7PKQ5,P18091,Q9JI91,P30998,P26233,Q6P0K8,Q9WU82,Q8NF91,P35609,B6V8E6,P14923,P35224,P35223,P35222,Q02453,Q8WNW3,Q9QXQ0,Q5RCS6,O43707,P18824,Q17GS9,P57780,A4UTP7,Q02248,Q3ZC55,F1QGH7,Q3B7N2,Q7QHW5,Q8SPJ1
GO:0050849	biological_process	negative regulation of calcium-mediated signaling	0.00959236	801	0.0077654	635	-0.304825	6.3e-05	0.589	0.00863749	0.00697981	-0.307426	5.42e-05	0.507	0.00435	GILETNFNTLQTK,ILAGDKPYITVEELR,LEPLEFQQCLVSLGYDVK,LAVLQDVDSLLLEFAK,MASDLLDWISK,LSPQALNVIVK,EVWAMVK,QEGGQEALNK,MDELELVHQDVQEAM,TTFMQYDSDR,ANVVGEWIK,FAIQDINIEESAAK,IMAIVDPNGTGYVTF,ALQFVYSK,EGYGEFPKPGETVV,GVGGVIPPNATLL,DSDGTLNDIQNKLDALR,ILAGDKPYITVEE,GVGGVIPPNATL,LGTGQVIR,ILAGDKPYITVEEL,GVGGVIPPNATLLF,GVGGVIPPNATLLFD,AAQELER,AWGNLEASEK,LTCSPDYAYGSR,ELQTCLTR,MLDAEEMVNMAKPDER,LAVLQDVDSLL,VLTINKDNEK,LGN…	GILETNFNTLQTK,ILAGDKPYITVEELR,LEPLEFQQCLVSLGYDVK,MQMQIQELLSK,IMITMLDRDFSGK,DDPLGNLNLAFEVADK,MASDLLDWISK,LSPQALNVIVK,EVWAMVK,QEGGQEALNK,MDELELVHQDVQEAM,TTFMQYDSDR,ANVVGEWIK,EIIKEGYGEFPKPGETVVV,FAIQDINIEESAAK,LNFDDFLQIVCR,IMAIVDPNGTGYVTF,ALQFVYSK,GVGGVIPPNATLL,DSDGTLNDIQNKLDALR,ILAGDKPYITVEE,GVGGVIPPNATL,EGYGEFPKPGETVVVH,LGTGQVIR,MLPWLQDRDSDGTLNDIQNK,ILAGDKPYITVEEL,TFSLYDKDNSGNMDIFELR,TQEISYTDTK,AA…	lcl|c239962_g2_i3|m.26573,lcl|c223629_g2_i1|m.9258,lcl|c234934_g3_i3|m.20432,lcl|c218375_g1_i1|m.5756,lcl|c222929_g2_i3|m.8717,lcl|c223629_g2_i2|m.9260,lcl|c223629_g2_i3|m.9261,lcl|c241047_g4_i1|m.28118,lcl|c243788_g1_i5|m.31318,lcl|c235481_g2_i1|m.20956	lcl|c239962_g2_i3|m.26573,lcl|c227706_g1_i7|m.12694,lcl|c223629_g2_i1|m.9258,lcl|c234934_g3_i3|m.20432,lcl|c218375_g1_i1|m.5756,lcl|c222929_g2_i3|m.8717,lcl|c223629_g2_i2|m.9260,lcl|c227706_g1_i4|m.12692,lcl|c223629_g2_i3|m.9261,lcl|c241047_g4_i1|m.28118,lcl|c243788_g1_i5|m.31318,lcl|c235481_g2_i1|m.20956	A5D7D1,Q08043,Q7TPR4,Q90734,Q9NSB8,Q9Z1P2,P30626,Q2PFV7,O42123,P12814,Q0III9,L7UZ85,P61023,P61022,P05094,P20111,O88990,Q7PKQ5,P18091,Q9JI91,Q5R4U9,Q8NF91,P35609,Q9QWW1,P78417,Q9QXQ0,Q5RCS6,O43707,O88801,P57780,Q3ZC55,Q3B7N2,Q6P069	A5D7D1,Q08043,Q7TPR4,Q90734,Q9NSB8,Q9Z1P2,P30626,Q2PFV7,O42123,P12814,P18266,Q0III9,L7UZ85,P61023,P61022,P05094,P20111,O88990,Q7PKQ5,P18091,Q9JI91,Q91757,Q5R4U9,Q8NF91,Q9WV60,P35609,Q5YJC2,Q9QWW1,P78417,Q9QXQ0,Q5RCS6,O43707,O88801,P57780,Q3ZC55,P49841,Q3B7N2,Q6P069
GO:0030833	biological_process	regulation of actin filament polymerization	0.0405011	3382	0.0367481	3005	-0.140291	7.57e-05	0.707	0.0364347	0.0329895	-0.143308	5.45e-05	0.51	0.00435	ENLLTDDLGR,QIVPSTENIK,VSEDEEKEKEDTGEIK,SGQDLLDSGHY,GGADSGFNKVEEK,VFTYWK,GQELVDSDHSEK,QEAFLADDNLGDSLDGVEALIR,DHQAELEGAYNELLQLAAAR,EPPTELQGTDAR,VEPTDYKPR,QLNPNTTVK,AAVGYEYK,QGFVPAAYVK,EIPGAYDYK,EPSEYDILHIQNQK,LTTFELR,SEEDRITEAEKNER,NVDNRYDNLMQQAAQR,ERETGIPPEQSMETAK,HPLDSASTDLLEVSR,VLVCDNGTGFVK,TPLTSEQAFYAR,SKVDVVDGDNWESK,ALQASALK,MLLFTQK,SMAGEIGTLDPQMER,SWISEKDTALSTSDYGR,ETWLNENQR,LDTMANEREELEK,ETE…	HSLVEADIAAQADR,ENLLTDDLGR,VLNDQIFAVLNK,SGQDLLDSGHY,GGADSGFNKVEEK,VFTYWK,GQELVDSDHSEK,QEAFLADDNLGDSLDGVEALIR,DHYATPEINEK,DHQAELEGAYNELLQLAAAR,TQDLQEKYDNLK,EPPTELQGTDAR,VEPTDYKPR,QLNPNTTVK,QGFVPAAYVK,EIPGAYDYK,EPSEYDILHIQNQK,LTTFELR,SEEDRITEAEKNER,NVDNRYDNLMQQAAQR,ERETGIPPEQSMETAK,EQIDEIKTK,VLVCDNGTGFVK,TPLTSEQAFYAR,SKVDVVDGDNWESK,LQNGRPVNVVSK,ALQASALK,MLLFTQK,SWISEKDTALSTSDYGR,ETWLNENQR,ETENVGSSQE…	lcl|c234060_g2_i2|m.19387,lcl|c235052_g1_i3|m.20523,lcl|c241874_g1_i8|m.29086,lcl|c232719_g2_i1|m.17712,lcl|c226782_g6_i4|m.11783,lcl|c229592_g3_i11|m.14442,lcl|c241874_g1_i8|m.29081,lcl|c241874_g1_i8|m.29082,lcl|c222307_g1_i1|m.8241,lcl|c242633_g1_i1|m.30058,lcl|c223297_g2_i1|m.9009,lcl|c214656_g8_i1|m.3574,lcl|c241874_g1_i8|m.29078,lcl|c241874_g1_i8|m.29079,lcl|c229340_g1_i1|m.14173,lcl|c226782…	lcl|c234060_g2_i2|m.19387,lcl|c235052_g1_i3|m.20523,lcl|c241874_g1_i8|m.29086,lcl|c232719_g2_i1|m.17712,lcl|c226782_g6_i4|m.11783,lcl|c229592_g3_i11|m.14442,lcl|c241874_g1_i8|m.29081,lcl|c241874_g1_i8|m.29082,lcl|c242633_g1_i1|m.30058,lcl|c223297_g2_i1|m.9009,lcl|c214656_g8_i1|m.3574,lcl|c241874_g1_i8|m.29078,lcl|c241874_g1_i8|m.29079,lcl|c229340_g1_i1|m.14173,lcl|c239346_g2_i2|m.25614,lcl|c22678…	A5A6I5,Q2US45,Q4V7C7,O43795,Q7ZXV3,Q90YM8,Q3UMM4,Q7TMB8,Q9JM76,P32392,E7F9L8,F1PRN2,Q5SYD0,A8N2Y6,P07751,Q60598,Q9W2N0,Q9UBC5,Q5R507,Q43433,Q62774,Q43432,O00159,P11574,Q6EDY6,A7MB62,P40792,Q9VF87,O88329,O00160,A5DKH0,P60984,P60983,P61158,P61157,P22467,Q61WW9,Q13813,Q12965,P62815,A1DBH2,Q5R6P6,P79136,P0CP01,Q6BUQ2,Q9UQ16,P0CP00,Q40079,Q40078,P61161,P61160,P19706,Q23979,Q5XI32,Q38681,Q23978,Q38680,…	A5A6I5,Q2US45,Q4V7C7,O43795,Q7ZXV3,Q90YM8,Q3UMM4,Q7TMB8,Q9JM76,P32392,E7F9L8,F1PRN2,Q5SYD0,A8N2Y6,P07751,Q60598,Q9W2N0,Q9UBC5,Q5R507,Q43433,Q62774,Q43432,O00159,P11574,Q6EDY6,A7MB62,P40792,Q9VF87,O88329,O00160,A5DKH0,P60984,P60983,P61158,P61157,P22467,Q61WW9,Q13813,Q12965,P62815,A1DBH2,Q5R6P6,P79136,P0CP01,Q6BUQ2,Q9UQ16,P0CP00,Q40079,Q40078,P61161,P61160,Q21313,P19706,Q8BKF1,Q23979,Q5XI32,Q38681,…
GO:1901565	biological_process	organonitrogen compound catabolic process	0.0476624	3980	0.0520832	4259	0.127967	3.65e-05	0.341	0.0428751	0.0467515	0.124872	5.85e-05	0.547	0.00435	SMALDQLSNSHPI,SILYVPK,SESEIKETNAR,DVPLVPTDHVF,LNVGGTSFLTTK,IFNIYPR,GAIGIFYGNK,LGVPALTSR,LIALEVGK,VQEEYIKDEQK,WVVPFTYFTSSSPVSTISK,LYQGQGGGQGGEGAPTEEEKPE,NSPAIIFIDEIDAIAPK,VLTGETMNPYVK,LIINSLYR,ENYNELFR,EMSDVNEWLK,IYVEIER,LYQGQGGGQGGEGAPTEEEKPEEAEHDKDEL,ELYESELR,MGTTVATNALLER,EMELAENEMPGLMEMR,VLSPPSAYLTSYTVWGALR,LLTGYPENEK,NVILGVAR,DHDEPLAK,TVELVEIAGNR,IGEDTEAQK,VEREPYNGPVIQLPTSQLPQIVSPSQR,VQLFSGDG…	SMALDQLSNSHPI,SILYVPK,SESEIKETNAR,IFNIYPR,LGVPALTSR,LIALEVGK,WVVPFTYFTSSSPVSTISK,LYQGQGGGQGGEGAPTEEEKPE,VLTGETMNPYVK,LIINSLYR,ENYNELFR,KELEDVVQPIVSK,IHDGSEEPATHNALAK,TGIIYNDEMDDFSTPGKK,LYQGQGGGQGGEGAPTEEEKPEEAEHDKDEL,ELYESELR,VELGPPDAILGITEAF,EMELAENEMPGLMEMR,ADDSDQQLLGHLL,VLSPPSAYLTSYTVWGALR,LLTGYPENEK,DVWLPTPSWGNHTPILK,NVILGVAR,DHDEPLAK,TVELVEIAGNR,IGEDTEAQK,VEREPYNGPVIQLPTSQLPQIVSPSQR,SWAMTPAP…	lcl|c232931_g1_i9|m.17924,lcl|c217887_g8_i2|m.5422,lcl|c227746_g3_i10|m.12727,lcl|c227804_g2_i7|m.12776,lcl|c233948_g1_i2|m.19238,lcl|c229110_g2_i1|m.13970,lcl|c229507_g2_i10|m.14342,lcl|c227928_g3_i7|m.12901,lcl|c218123_g3_i3|m.5573,lcl|c234851_g1_i5|m.20338,lcl|c201441_g1_i1|m.1204,lcl|c232931_g1_i10|m.17922,lcl|c229917_g4_i4|m.14770,lcl|c224848_g3_i1|m.10171,lcl|c241027_g2_i5|m.28094,lcl|c2375…	lcl|c232931_g1_i9|m.17924,lcl|c217887_g8_i2|m.5422,lcl|c227746_g3_i10|m.12727,lcl|c227804_g2_i7|m.12776,lcl|c233948_g1_i2|m.19238,lcl|c229110_g2_i1|m.13970,lcl|c229507_g2_i10|m.14342,lcl|c227928_g3_i7|m.12901,lcl|c218123_g3_i3|m.5573,lcl|c237612_g2_i11|m.23489,lcl|c234851_g1_i5|m.20338,lcl|c201441_g1_i1|m.1204,lcl|c232931_g1_i10|m.17922,lcl|c229917_g4_i4|m.14770,lcl|c224848_g3_i1|m.10171,lcl|c241…	A3N2R4,Q3IH68,P17427,P17426,B9J8M3,Q48DE6,Q5R7D3,Q3KIT2,F6XBL2,Q9N1U2,Q9M0V3,Q9Z2U1,P07633,Q75WB5,Q3TXU5,A1U4Z8,A2C4S2,A1TSZ6,Q5R9I6,Q09639,O13465,P36181,Q8NE62,Q9VFI9,Q9NQW7,Q6A3P9,Q54KE6,O61998,B0KUZ7,Q4QN09,Q9FIZ7,P41753,Q7VRS6,Q31B49,Q5I597,P50047,Q2JWP0,Q2QMG2,Q8FZW2,P25098,P32865,Q9UL12,A4TL32,Q5YWR8,Q3U1J4,Q5LSQ2,P54814,Q2SDQ1,P54812,P54811,A9AZE6,Q9ESW0,Q9TUG3,Q826R9,Q6GM78,P39007,O60658,…	A3N2R4,Q3IH68,P17427,P17426,B9J8M3,Q48DE6,Q5R7D3,Q3KIT2,F6XBL2,Q9N1U2,Q9M0V3,Q9Z2U1,P07633,Q75WB5,A1U4Z8,A2C4S2,A1TSZ6,Q5R9I6,P16112,Q09639,O13465,P36181,Q8NE62,Q9VFI9,Q6A3P9,O61998,B0KUZ7,Q4QN09,Q9FIZ7,Q5XIT9,P41753,Q7VRS6,Q31B49,Q5I597,P50047,Q2JWP0,Q8FZW2,P25098,P32865,A4TL32,Q5YWR8,Q3U1J4,Q5LSQ2,P54814,Q2SDQ1,P54812,P54811,A9AZE6,Q9ESW0,Q9TUG3,Q826R9,Q6P3K3,P39007,O60658,Q1KKS3,B5ZMP0,O09173,…
GO:1901077	biological_process	regulation of relaxation of muscle	0.00923309	771	0.00745967	610	-0.307701	7.5e-05	0.701	0.0083144	0.00670544	-0.310279	6.48e-05	0.606	0.00435	GILETNFNTLQTK,ILAGDKPYITVEELR,LEPLEFQQCLVSLGYDVK,LAVLQDVDSLLLEFAK,MASDLLDWISK,LSPQALNVIVK,ELEYQIK,EQQIIQLTQK,NVDASETSHTVTNLAR,EVWAMVK,MDELELVHQDVQEAM,TTFMQYDSDR,ANVVGEWIK,LTAFEPEAR,FAIQDINIEESAAK,GINLSGGQK,IMAIVDPNGTGYVTF,ALQFVYSK,AGAYDYPSPEWDTVTDEAK,IGSSGAPVTDQSEETR,DSDGTLNDIQNKLDALR,NRGGESNPDER,ILAGDKPYITVEE,ILAGDKPYITVEEL,NVDASETSHTV,GGESNPDER,AAQELER,DQSEAKPGPWK,AWGNLEASEK,ELQTCLTR,FVLNYEDVTR…	GILETNFNTLQTK,ILAGDKPYITVEELR,GTLIDTTSFTLK,LEPLEFQQCLVSLGYDVK,IMITMLDRDFSGK,DDPLGNLNLAFEVADK,MASDLLDWISK,LSPQALNVIVK,ELEYQIK,EQQIIQLTQK,NVDASETSHTVTNLAR,EVWAMVK,MDELELVHQDVQEAM,TTFMQYDSDR,ANVVGEWIK,EVGKPGVVQDFAADATCDSVEL,LTAFEPEAR,FAIQDINIEESAAK,GINLSGGQK,LNFDDFLQIVCR,IMAIVDPNGTGYVTF,ALQFVYSK,IGSSGAPVTDQSEETR,DSDGTLNDIQNKLDALR,ILAGDKPYITVEE,LTQRIGSSGAPVTDQSEETR,KPQDTGGDNEIEY,DIKPENL,MLPWLQDRDSDGT…	lcl|c217326_g3_i1|m.5105,lcl|c243788_g1_i5|m.31318,lcl|c228653_g2_i5|m.13498,lcl|c235481_g2_i1|m.20956,lcl|c233370_g1_i2|m.18468,lcl|c226071_g2_i11|m.11178,lcl|c234934_g3_i3|m.20432,lcl|c226071_g2_i7|m.11182,lcl|c218375_g1_i1|m.5756,lcl|c228653_g2_i7|m.13499,lcl|c226071_g2_i1|m.11176,lcl|c240767_g1_i1|m.27718,lcl|c226071_g2_i14|m.11179	lcl|c234064_g1_i4|m.19396,lcl|c210586_g1_i2|m.2213,lcl|c234064_g1_i2|m.19394,lcl|c210586_g1_i1|m.2212,lcl|c239574_g1_i2|m.26000,lcl|c210586_g1_i4|m.2214,lcl|c242662_g1_i1|m.30100,lcl|c229547_g1_i1|m.14385,lcl|c221676_g4_i8|m.7788,lcl|c235481_g2_i1|m.20956,lcl|c233370_g1_i2|m.18468,lcl|c226454_g2_i17|m.11487,lcl|c234064_g1_i1|m.19391,lcl|c226071_g2_i11|m.11178,lcl|c241464_g1_i3|m.28607,lcl|c241464…	Q08043,Q7FB56,Q7GB25,A7KVC2,Q54JR2,P12814,P32386,Q5RCC4,Q54LE6,Q28689,Q8VZZ4,Q54V86,Q923T9,Q7PKQ5,Q8T6H3,P18091,Q8NF91,Q3MHJ9,P11730,Q9R1S7,Q8T6H8,Q9QYM0,O88563,Q9LZJ5,P30626,O60706,A2ASS6,Q0III9,Q95266,O77708,Q6Y306,Q5R4U9,P38735,Q5T3U5,Q5F364,P11798,P11275,Q63563,Q54VJ0,Q5RCS6,O35379,O43707,Q42093,O88269,Q9C8H1,Q6P069,Q80WJ6,Q9C8H0,Q10RX7,Q2PFV7,Q13557,O15440,Q8VI47,Q864R9,B2RX12,L7UZ85,A0A0D1C…	Q08043,Q7FB56,Q7GB25,Q15418,A7KVC2,Q54JR2,P12814,P32386,Q09137,Q5RCC4,Q54LE6,Q28689,Q8VZZ4,Q9DB30,Q54V86,A5GFW1,P49138,Q923T9,Q8T6H3,Q7PKQ5,P18091,Q8NF91,Q3MHJ9,P11730,Q9R1S7,Q9JLM8,P18652,P18653,Q8T6H8,P18654,P13234,Q9QYM0,O61661,O88563,Q9LZJ5,P0C605,Q9WUT3,P30626,Q8BRK8,O60706,A2ASS6,Q66JF3,Q0III9,Q95266,O77708,Q6Y306,Q0V7M1,Q5R4U9,P51812,P38735,Q5T3U5,P11798,Q5F364,P11275,Q63563,P54646,Q54VJ0,…
GO:1901018	biological_process	positive regulation of potassium ion transmembrane transporter activity	0.00589193	492	0.00448803	367	-0.392658	7.23e-05	0.676	0.00530958	0.00403863	-0.394732	6.51e-05	0.609	0.00435	GILETNFNTLQTK,ILAGDKPYITVEELR,LEPLEFQQCLVSLGYDVK,VPVGDQPPDIEMLIR,LAVLQDVDSLLLEFAK,MASDLLDWISK,MDELELVHQDVQEAM,ANVVGEWIK,FAIQDINIEESAAK,GMEDLIPIMNK,GINLSGGQK,EIVAETDRETGSNK,IMAIVDPNGTGYVTF,ALQFVYSK,DSDGTLNDIQNKLDALR,ILAGDKPYITVEE,ILAGDKPYITVEEL,AIEGGGDSIDTK,AAQELER,AWGNLEASEK,SMAGEIGTLDPQMER,MLDAEEMVNMAKPDER,LAVLQDVDSLL,TLGVGGFGR,VLTINKDNEK,LGNRPAYLPTEGK,MLPWLQDR,MISDINR,SIALTMEGPLEDQLK,VSWEQLLTAI…	WFDGFNWEGLR,GILETNFNTLQTK,ILAGDKPYITVEELR,LEPLEFQQCLVSLGYDVK,DDPLGNLNLAFEVADK,MASDLLDWISK,MDELELVHQDVQEAM,ANVVGEWIK,FAIQDINIEESAAK,GINLSGGQK,IMAIVDPNGTGYVTF,ALQFVYSK,DSDGTLNDIQNKLDALR,ILAGDKPYITVEE,DIKPENL,MLPWLQDRDSDGTLNDIQNK,ILAGDKPYITVEEL,AIEGGGDSIDTK,AAQELER,AWGNLEASEK,MLDAEEMVNMAKPDER,LAVLQDVDSLL,TLGVGGFGR,CQYICDEWAK,VLTINKDNEK,LGNRPAYLPTEGK,MLPWLQDR,MISDINR,SIALTMEGPLEDQLK,DSDGTLNDIQNKLDAL,…	lcl|c221802_g2_i1|m.7868,lcl|c234934_g3_i3|m.20432,lcl|c225423_g3_i2|m.10600,lcl|c226071_g2_i7|m.11182,lcl|c239343_g4_i4|m.25612,lcl|c237286_g1_i3|m.23120,lcl|c243788_g1_i5|m.31318,lcl|c226071_g2_i1|m.11176,lcl|c240767_g1_i1|m.27718,lcl|c226071_g2_i14|m.11179,lcl|c226071_g2_i11|m.11178	lcl|c234064_g1_i4|m.19396,lcl|c210586_g1_i2|m.2213,lcl|c234064_g1_i2|m.19394,lcl|c210586_g1_i1|m.2212,lcl|c239574_g1_i2|m.26000,lcl|c210586_g1_i4|m.2214,lcl|c242662_g1_i1|m.30100,lcl|c229547_g1_i1|m.14385,lcl|c221676_g4_i8|m.7788,lcl|c226454_g2_i17|m.11487,lcl|c234064_g1_i1|m.19391,lcl|c226071_g2_i11|m.11178,lcl|c241464_g1_i3|m.28607,lcl|c241464_g1_i1|m.28602,lcl|c239574_g1_i8|m.26002,lcl|c225854…	Q08043,Q7FB56,Q7GB25,A7KVC2,Q15418,Q54JR2,P12814,P32386,Q54LE6,Q28689,Q8VZZ4,Q54V86,Q7PKQ5,Q8T6H3,P18091,Q8NF91,Q9R1S7,P18652,Q8T6H8,P18653,P18654,Q9QYM0,P39054,P39053,P39055,P39052,O88563,Q9LZJ5,P0C605,Q9WUT3,Q9UQ16,O60706,Q0III9,Q6Y306,P38735,P51812,Q5T3U5,Q5F364,Q63563,Q54VJ0,Q5RCS6,O35379,O43707,P27619,Q42093,O88269,Q9C8H1,Q80WJ6,Q9C8H0,Q10RX7,Q2PFV7,P50570,O15440,Q8VI47,Q864R9,Q63531,B2RX12,…	Q08043,Q7FB56,Q7GB25,Q15418,A7KVC2,Q54JR2,P12814,P32386,Q09137,Q5RCC4,Q54LE6,Q28689,Q8VZZ4,Q9DB30,Q54V86,A5GFW1,P49138,Q923T9,Q8T6H3,Q7PKQ5,P18091,Q8NF91,Q3MHJ9,P11730,Q9R1S7,Q9JLM8,P18652,P18653,Q8T6H8,P18654,P13234,Q9QYM0,P39054,P39053,P39055,O61661,P39052,O88563,Q9LZJ5,P0C605,Q9WUT3,Q8BRK8,O60706,Q9UQ16,Q66JF3,Q0III9,Q95266,O77708,Q6Y306,Q0V7M1,P51812,P38735,Q5T3U5,P11798,Q5F364,P11275,Q63563,…
GO:1901078	biological_process	negative regulation of relaxation of muscle	0.0056644	473	0.00429237	351	-0.400148	7.51e-05	0.702	0.00510495	0.00386304	-0.402162	6.79e-05	0.634	0.00435	GILETNFNTLQTK,MISDINR,ILAGDKPYITVEELR,SIALTMEGPLEDQLK,LEPLEFQQCLVSLGYDVK,LAVLQDVDSLLLEFAK,VSWEQLLTAIAR,MASDLLDWISK,GLLDAAWER,MDELELVHQDVQEAM,ANVVGEWIK,FAIQDINIEESAAK,DGLLLWCQR,LDHLAEK,IMAIVDPNGTGYVTF,ALQFVYSK,LAVLQDVDSLLL,DSDGTLNDIQNKLDALR,ILAGDKPYITVEE,NINEIENQILT,VDSINER,LGNRPAYLPT,ILAGDKPYITVEEL,DDPLGNLNLAF,DSDGTLNDIQNK,AAPYNNWLESAR,MMEEYEK,NINEIENQILTR,MAPYEGPDAVPGALDY,AAQELER,GLTEEQMK,DDLENA…	GILETNFNTLQTK,MISDINR,ILAGDKPYITVEELR,SIALTMEGPLEDQLK,LEPLEFQQCLVSLGYDVK,VSWEQLLTAIAR,DSDGTLNDIQNKLDAL,DDPLGNLNLAFEVADK,MASDLLDWISK,GLLDAAWER,LAVLQDVDSLLLE,MDELELVHQDVQEAM,ANVVGEWIK,FAIQDINIEESAAK,LDHLAEK,IMAIVDPNGTGYVTF,ALQFVYSK,DFEDWLLK,LAVLQDVDSLLL,DSDGTLNDIQNKLDALR,ILAGDKPYITVEE,NINEIENQILT,VDSINER,LGNRPAYLPT,MLPWLQDRDSDGTLNDIQNK,ILAGDKPYITVEEL,DSDGTLNDIQNK,AAPYNNWLESAR,NINEIENQILTR,AAQELER,G…	lcl|c234934_g3_i3|m.20432,lcl|c243788_g1_i5|m.31318	lcl|c234934_g3_i3|m.20432,lcl|c243788_g1_i5|m.31318	Q7PKQ5,A5D7D1,P18091,Q08043,Q9JI91,Q7TPR4,Q90734,Q9Z1P2,Q8NF91,P35609,Q2PFV7,P12814,Q9QXQ0,Q0III9,Q5RCS6,L7UZ85,O43707,P57780,P05094,P20111,Q3ZC55,Q3B7N2,O88990	Q7PKQ5,A5D7D1,P18091,Q08043,Q9JI91,Q7TPR4,Q90734,Q9Z1P2,Q8NF91,P35609,Q2PFV7,P12814,Q9QXQ0,Q0III9,Q5RCS6,L7UZ85,O43707,P57780,P05094,P20111,Q3ZC55,Q3B7N2,O88990
GO:0014862	biological_process	regulation of skeletal muscle contraction by chemo-mechanical energy conversion	0.0056644	473	0.00429237	351	-0.400148	7.51e-05	0.702	0.00510495	0.00386304	-0.402162	6.79e-05	0.634	0.00435	GILETNFNTLQTK,MISDINR,ILAGDKPYITVEELR,SIALTMEGPLEDQLK,LEPLEFQQCLVSLGYDVK,LAVLQDVDSLLLEFAK,VSWEQLLTAIAR,MASDLLDWISK,GLLDAAWER,MDELELVHQDVQEAM,ANVVGEWIK,FAIQDINIEESAAK,DGLLLWCQR,LDHLAEK,IMAIVDPNGTGYVTF,ALQFVYSK,LAVLQDVDSLLL,DSDGTLNDIQNKLDALR,ILAGDKPYITVEE,NINEIENQILT,VDSINER,LGNRPAYLPT,ILAGDKPYITVEEL,DDPLGNLNLAF,DSDGTLNDIQNK,AAPYNNWLESAR,MMEEYEK,NINEIENQILTR,MAPYEGPDAVPGALDY,AAQELER,GLTEEQMK,DDLENA…	GILETNFNTLQTK,MISDINR,ILAGDKPYITVEELR,SIALTMEGPLEDQLK,LEPLEFQQCLVSLGYDVK,VSWEQLLTAIAR,DSDGTLNDIQNKLDAL,DDPLGNLNLAFEVADK,MASDLLDWISK,GLLDAAWER,LAVLQDVDSLLLE,MDELELVHQDVQEAM,ANVVGEWIK,FAIQDINIEESAAK,LDHLAEK,IMAIVDPNGTGYVTF,ALQFVYSK,DFEDWLLK,LAVLQDVDSLLL,DSDGTLNDIQNKLDALR,ILAGDKPYITVEE,NINEIENQILT,VDSINER,LGNRPAYLPT,MLPWLQDRDSDGTLNDIQNK,ILAGDKPYITVEEL,DSDGTLNDIQNK,AAPYNNWLESAR,NINEIENQILTR,AAQELER,G…	lcl|c234934_g3_i3|m.20432,lcl|c243788_g1_i5|m.31318	lcl|c234934_g3_i3|m.20432,lcl|c243788_g1_i5|m.31318	Q7PKQ5,A5D7D1,P18091,Q08043,Q9JI91,Q7TPR4,Q90734,Q9Z1P2,Q8NF91,P35609,Q2PFV7,P12814,Q9QXQ0,Q0III9,Q5RCS6,L7UZ85,O43707,P57780,P05094,P20111,Q3ZC55,Q3B7N2,O88990	Q7PKQ5,A5D7D1,P18091,Q08043,Q9JI91,Q7TPR4,Q90734,Q9Z1P2,Q8NF91,P35609,Q2PFV7,P12814,Q9QXQ0,Q0III9,Q5RCS6,L7UZ85,O43707,P57780,P05094,P20111,Q3ZC55,Q3B7N2,O88990
GO:0014883	biological_process	transition between fast and slow fiber	0.0056644	473	0.00429237	351	-0.400148	7.51e-05	0.702	0.00510495	0.00386304	-0.402162	6.79e-05	0.634	0.00435	GILETNFNTLQTK,MISDINR,ILAGDKPYITVEELR,SIALTMEGPLEDQLK,LEPLEFQQCLVSLGYDVK,LAVLQDVDSLLLEFAK,VSWEQLLTAIAR,MASDLLDWISK,GLLDAAWER,MDELELVHQDVQEAM,ANVVGEWIK,FAIQDINIEESAAK,DGLLLWCQR,LDHLAEK,IMAIVDPNGTGYVTF,ALQFVYSK,LAVLQDVDSLLL,DSDGTLNDIQNKLDALR,ILAGDKPYITVEE,NINEIENQILT,VDSINER,LGNRPAYLPT,ILAGDKPYITVEEL,DDPLGNLNLAF,DSDGTLNDIQNK,AAPYNNWLESAR,MMEEYEK,NINEIENQILTR,MAPYEGPDAVPGALDY,AAQELER,GLTEEQMK,DDLENA…	GILETNFNTLQTK,MISDINR,ILAGDKPYITVEELR,SIALTMEGPLEDQLK,LEPLEFQQCLVSLGYDVK,VSWEQLLTAIAR,DSDGTLNDIQNKLDAL,DDPLGNLNLAFEVADK,MASDLLDWISK,GLLDAAWER,LAVLQDVDSLLLE,MDELELVHQDVQEAM,ANVVGEWIK,FAIQDINIEESAAK,LDHLAEK,IMAIVDPNGTGYVTF,ALQFVYSK,DFEDWLLK,LAVLQDVDSLLL,DSDGTLNDIQNKLDALR,ILAGDKPYITVEE,NINEIENQILT,VDSINER,LGNRPAYLPT,MLPWLQDRDSDGTLNDIQNK,ILAGDKPYITVEEL,DSDGTLNDIQNK,AAPYNNWLESAR,NINEIENQILTR,AAQELER,G…	lcl|c234934_g3_i3|m.20432,lcl|c243788_g1_i5|m.31318	lcl|c234934_g3_i3|m.20432,lcl|c243788_g1_i5|m.31318	Q7PKQ5,A5D7D1,P18091,Q08043,Q9JI91,Q7TPR4,Q90734,Q9Z1P2,Q8NF91,P35609,Q2PFV7,P12814,Q9QXQ0,Q0III9,Q5RCS6,L7UZ85,O43707,P57780,P05094,P20111,Q3ZC55,Q3B7N2,O88990	Q7PKQ5,A5D7D1,P18091,Q08043,Q9JI91,Q7TPR4,Q90734,Q9Z1P2,Q8NF91,P35609,Q2PFV7,P12814,Q9QXQ0,Q0III9,Q5RCS6,L7UZ85,O43707,P57780,P05094,P20111,Q3ZC55,Q3B7N2,O88990
GO:0014891	biological_process	striated muscle atrophy	0.0056644	473	0.00429237	351	-0.400148	7.51e-05	0.702	0.00510495	0.00386304	-0.402162	6.79e-05	0.634	0.00435	GILETNFNTLQTK,MISDINR,ILAGDKPYITVEELR,SIALTMEGPLEDQLK,LEPLEFQQCLVSLGYDVK,LAVLQDVDSLLLEFAK,VSWEQLLTAIAR,MASDLLDWISK,GLLDAAWER,MDELELVHQDVQEAM,ANVVGEWIK,FAIQDINIEESAAK,DGLLLWCQR,LDHLAEK,IMAIVDPNGTGYVTF,ALQFVYSK,LAVLQDVDSLLL,DSDGTLNDIQNKLDALR,ILAGDKPYITVEE,NINEIENQILT,VDSINER,LGNRPAYLPT,ILAGDKPYITVEEL,DDPLGNLNLAF,DSDGTLNDIQNK,AAPYNNWLESAR,MMEEYEK,NINEIENQILTR,MAPYEGPDAVPGALDY,AAQELER,GLTEEQMK,DDLENA…	GILETNFNTLQTK,MISDINR,ILAGDKPYITVEELR,SIALTMEGPLEDQLK,LEPLEFQQCLVSLGYDVK,VSWEQLLTAIAR,DSDGTLNDIQNKLDAL,DDPLGNLNLAFEVADK,MASDLLDWISK,GLLDAAWER,LAVLQDVDSLLLE,MDELELVHQDVQEAM,ANVVGEWIK,FAIQDINIEESAAK,LDHLAEK,IMAIVDPNGTGYVTF,ALQFVYSK,DFEDWLLK,LAVLQDVDSLLL,DSDGTLNDIQNKLDALR,ILAGDKPYITVEE,NINEIENQILT,VDSINER,LGNRPAYLPT,MLPWLQDRDSDGTLNDIQNK,ILAGDKPYITVEEL,DSDGTLNDIQNK,AAPYNNWLESAR,NINEIENQILTR,AAQELER,G…	lcl|c234934_g3_i3|m.20432,lcl|c243788_g1_i5|m.31318	lcl|c234934_g3_i3|m.20432,lcl|c243788_g1_i5|m.31318	Q7PKQ5,A5D7D1,P18091,Q08043,Q9JI91,Q7TPR4,Q90734,Q9Z1P2,Q8NF91,P35609,Q2PFV7,P12814,Q9QXQ0,Q0III9,Q5RCS6,L7UZ85,O43707,P57780,P05094,P20111,Q3ZC55,Q3B7N2,O88990	Q7PKQ5,A5D7D1,P18091,Q08043,Q9JI91,Q7TPR4,Q90734,Q9Z1P2,Q8NF91,P35609,Q2PFV7,P12814,Q9QXQ0,Q0III9,Q5RCS6,L7UZ85,O43707,P57780,P05094,P20111,Q3ZC55,Q3B7N2,O88990
GO:0014889	biological_process	muscle atrophy	0.0056644	473	0.00429237	351	-0.400148	7.51e-05	0.702	0.00510495	0.00386304	-0.402162	6.79e-05	0.634	0.00435	GILETNFNTLQTK,MISDINR,ILAGDKPYITVEELR,SIALTMEGPLEDQLK,LEPLEFQQCLVSLGYDVK,LAVLQDVDSLLLEFAK,VSWEQLLTAIAR,MASDLLDWISK,GLLDAAWER,MDELELVHQDVQEAM,ANVVGEWIK,FAIQDINIEESAAK,DGLLLWCQR,LDHLAEK,IMAIVDPNGTGYVTF,ALQFVYSK,LAVLQDVDSLLL,DSDGTLNDIQNKLDALR,ILAGDKPYITVEE,NINEIENQILT,VDSINER,LGNRPAYLPT,ILAGDKPYITVEEL,DDPLGNLNLAF,DSDGTLNDIQNK,AAPYNNWLESAR,MMEEYEK,NINEIENQILTR,MAPYEGPDAVPGALDY,AAQELER,GLTEEQMK,DDLENA…	GILETNFNTLQTK,MISDINR,ILAGDKPYITVEELR,SIALTMEGPLEDQLK,LEPLEFQQCLVSLGYDVK,VSWEQLLTAIAR,DSDGTLNDIQNKLDAL,DDPLGNLNLAFEVADK,MASDLLDWISK,GLLDAAWER,LAVLQDVDSLLLE,MDELELVHQDVQEAM,ANVVGEWIK,FAIQDINIEESAAK,LDHLAEK,IMAIVDPNGTGYVTF,ALQFVYSK,DFEDWLLK,LAVLQDVDSLLL,DSDGTLNDIQNKLDALR,ILAGDKPYITVEE,NINEIENQILT,VDSINER,LGNRPAYLPT,MLPWLQDRDSDGTLNDIQNK,ILAGDKPYITVEEL,DSDGTLNDIQNK,AAPYNNWLESAR,NINEIENQILTR,AAQELER,G…	lcl|c234934_g3_i3|m.20432,lcl|c243788_g1_i5|m.31318	lcl|c234934_g3_i3|m.20432,lcl|c243788_g1_i5|m.31318	Q7PKQ5,A5D7D1,P18091,Q08043,Q9JI91,Q7TPR4,Q90734,Q9Z1P2,Q8NF91,P35609,Q2PFV7,P12814,Q9QXQ0,Q0III9,Q5RCS6,L7UZ85,O43707,P57780,P05094,P20111,Q3ZC55,Q3B7N2,O88990	Q7PKQ5,A5D7D1,P18091,Q08043,Q9JI91,Q7TPR4,Q90734,Q9Z1P2,Q8NF91,P35609,Q2PFV7,P12814,Q9QXQ0,Q0III9,Q5RCS6,L7UZ85,O43707,P57780,P05094,P20111,Q3ZC55,Q3B7N2,O88990
GO:0014888	biological_process	striated muscle adaptation	0.0056644	473	0.00429237	351	-0.400148	7.51e-05	0.702	0.00510495	0.00386304	-0.402162	6.79e-05	0.634	0.00435	GILETNFNTLQTK,MISDINR,ILAGDKPYITVEELR,SIALTMEGPLEDQLK,LEPLEFQQCLVSLGYDVK,LAVLQDVDSLLLEFAK,VSWEQLLTAIAR,MASDLLDWISK,GLLDAAWER,MDELELVHQDVQEAM,ANVVGEWIK,FAIQDINIEESAAK,DGLLLWCQR,LDHLAEK,IMAIVDPNGTGYVTF,ALQFVYSK,LAVLQDVDSLLL,DSDGTLNDIQNKLDALR,ILAGDKPYITVEE,NINEIENQILT,VDSINER,LGNRPAYLPT,ILAGDKPYITVEEL,DDPLGNLNLAF,DSDGTLNDIQNK,AAPYNNWLESAR,MMEEYEK,NINEIENQILTR,MAPYEGPDAVPGALDY,AAQELER,GLTEEQMK,DDLENA…	GILETNFNTLQTK,MISDINR,ILAGDKPYITVEELR,SIALTMEGPLEDQLK,LEPLEFQQCLVSLGYDVK,VSWEQLLTAIAR,DSDGTLNDIQNKLDAL,DDPLGNLNLAFEVADK,MASDLLDWISK,GLLDAAWER,LAVLQDVDSLLLE,MDELELVHQDVQEAM,ANVVGEWIK,FAIQDINIEESAAK,LDHLAEK,IMAIVDPNGTGYVTF,ALQFVYSK,DFEDWLLK,LAVLQDVDSLLL,DSDGTLNDIQNKLDALR,ILAGDKPYITVEE,NINEIENQILT,VDSINER,LGNRPAYLPT,MLPWLQDRDSDGTLNDIQNK,ILAGDKPYITVEEL,DSDGTLNDIQNK,AAPYNNWLESAR,NINEIENQILTR,AAQELER,G…	lcl|c234934_g3_i3|m.20432,lcl|c243788_g1_i5|m.31318	lcl|c234934_g3_i3|m.20432,lcl|c243788_g1_i5|m.31318	Q7PKQ5,A5D7D1,P18091,Q08043,Q9JI91,Q7TPR4,Q90734,Q9Z1P2,Q8NF91,P35609,Q2PFV7,P12814,Q9QXQ0,Q0III9,Q5RCS6,L7UZ85,O43707,P57780,P05094,P20111,Q3ZC55,Q3B7N2,O88990	Q7PKQ5,A5D7D1,P18091,Q08043,Q9JI91,Q7TPR4,Q90734,Q9Z1P2,Q8NF91,P35609,Q2PFV7,P12814,Q9QXQ0,Q0III9,Q5RCS6,L7UZ85,O43707,P57780,P05094,P20111,Q3ZC55,Q3B7N2,O88990
GO:0036344	biological_process	platelet morphogenesis	0.0056644	473	0.00429237	351	-0.400148	7.51e-05	0.702	0.00510495	0.00386304	-0.402162	6.79e-05	0.634	0.00435	GILETNFNTLQTK,MISDINR,ILAGDKPYITVEELR,SIALTMEGPLEDQLK,LEPLEFQQCLVSLGYDVK,LAVLQDVDSLLLEFAK,VSWEQLLTAIAR,MASDLLDWISK,GLLDAAWER,MDELELVHQDVQEAM,ANVVGEWIK,FAIQDINIEESAAK,DGLLLWCQR,LDHLAEK,IMAIVDPNGTGYVTF,ALQFVYSK,LAVLQDVDSLLL,DSDGTLNDIQNKLDALR,ILAGDKPYITVEE,NINEIENQILT,VDSINER,LGNRPAYLPT,ILAGDKPYITVEEL,DDPLGNLNLAF,DSDGTLNDIQNK,AAPYNNWLESAR,MMEEYEK,NINEIENQILTR,MAPYEGPDAVPGALDY,AAQELER,GLTEEQMK,DDLENA…	GILETNFNTLQTK,MISDINR,ILAGDKPYITVEELR,SIALTMEGPLEDQLK,LEPLEFQQCLVSLGYDVK,VSWEQLLTAIAR,DSDGTLNDIQNKLDAL,DDPLGNLNLAFEVADK,MASDLLDWISK,GLLDAAWER,LAVLQDVDSLLLE,MDELELVHQDVQEAM,ANVVGEWIK,FAIQDINIEESAAK,LDHLAEK,IMAIVDPNGTGYVTF,ALQFVYSK,DFEDWLLK,LAVLQDVDSLLL,DSDGTLNDIQNKLDALR,ILAGDKPYITVEE,NINEIENQILT,VDSINER,LGNRPAYLPT,MLPWLQDRDSDGTLNDIQNK,ILAGDKPYITVEEL,DSDGTLNDIQNK,AAPYNNWLESAR,NINEIENQILTR,AAQELER,G…	lcl|c234934_g3_i3|m.20432,lcl|c243788_g1_i5|m.31318	lcl|c234934_g3_i3|m.20432,lcl|c243788_g1_i5|m.31318	Q7PKQ5,A5D7D1,P18091,Q08043,Q9JI91,Q7TPR4,Q90734,Q9Z1P2,Q8NF91,P35609,Q2PFV7,P12814,Q9QXQ0,Q0III9,Q5RCS6,L7UZ85,O43707,P57780,P05094,P20111,Q3ZC55,Q3B7N2,O88990	Q7PKQ5,A5D7D1,P18091,Q08043,Q9JI91,Q7TPR4,Q90734,Q9Z1P2,Q8NF91,P35609,Q2PFV7,P12814,Q9QXQ0,Q0III9,Q5RCS6,L7UZ85,O43707,P57780,P05094,P20111,Q3ZC55,Q3B7N2,O88990
GO:0043501	biological_process	skeletal muscle adaptation	0.0056644	473	0.00429237	351	-0.400148	7.51e-05	0.702	0.00510495	0.00386304	-0.402162	6.79e-05	0.634	0.00435	GILETNFNTLQTK,MISDINR,ILAGDKPYITVEELR,SIALTMEGPLEDQLK,LEPLEFQQCLVSLGYDVK,LAVLQDVDSLLLEFAK,VSWEQLLTAIAR,MASDLLDWISK,GLLDAAWER,MDELELVHQDVQEAM,ANVVGEWIK,FAIQDINIEESAAK,DGLLLWCQR,LDHLAEK,IMAIVDPNGTGYVTF,ALQFVYSK,LAVLQDVDSLLL,DSDGTLNDIQNKLDALR,ILAGDKPYITVEE,NINEIENQILT,VDSINER,LGNRPAYLPT,ILAGDKPYITVEEL,DDPLGNLNLAF,DSDGTLNDIQNK,AAPYNNWLESAR,MMEEYEK,NINEIENQILTR,MAPYEGPDAVPGALDY,AAQELER,GLTEEQMK,DDLENA…	GILETNFNTLQTK,MISDINR,ILAGDKPYITVEELR,SIALTMEGPLEDQLK,LEPLEFQQCLVSLGYDVK,VSWEQLLTAIAR,DSDGTLNDIQNKLDAL,DDPLGNLNLAFEVADK,MASDLLDWISK,GLLDAAWER,LAVLQDVDSLLLE,MDELELVHQDVQEAM,ANVVGEWIK,FAIQDINIEESAAK,LDHLAEK,IMAIVDPNGTGYVTF,ALQFVYSK,DFEDWLLK,LAVLQDVDSLLL,DSDGTLNDIQNKLDALR,ILAGDKPYITVEE,NINEIENQILT,VDSINER,LGNRPAYLPT,MLPWLQDRDSDGTLNDIQNK,ILAGDKPYITVEEL,DSDGTLNDIQNK,AAPYNNWLESAR,NINEIENQILTR,AAQELER,G…	lcl|c234934_g3_i3|m.20432,lcl|c243788_g1_i5|m.31318	lcl|c234934_g3_i3|m.20432,lcl|c243788_g1_i5|m.31318	Q7PKQ5,A5D7D1,P18091,Q08043,Q9JI91,Q7TPR4,Q90734,Q9Z1P2,Q8NF91,P35609,Q2PFV7,P12814,Q9QXQ0,Q0III9,Q5RCS6,L7UZ85,O43707,P57780,P05094,P20111,Q3ZC55,Q3B7N2,O88990	Q7PKQ5,A5D7D1,P18091,Q08043,Q9JI91,Q7TPR4,Q90734,Q9Z1P2,Q8NF91,P35609,Q2PFV7,P12814,Q9QXQ0,Q0III9,Q5RCS6,L7UZ85,O43707,P57780,P05094,P20111,Q3ZC55,Q3B7N2,O88990
GO:0043500	biological_process	muscle adaptation	0.0056644	473	0.00429237	351	-0.400148	7.51e-05	0.702	0.00510495	0.00386304	-0.402162	6.79e-05	0.634	0.00435	GILETNFNTLQTK,MISDINR,ILAGDKPYITVEELR,SIALTMEGPLEDQLK,LEPLEFQQCLVSLGYDVK,LAVLQDVDSLLLEFAK,VSWEQLLTAIAR,MASDLLDWISK,GLLDAAWER,MDELELVHQDVQEAM,ANVVGEWIK,FAIQDINIEESAAK,DGLLLWCQR,LDHLAEK,IMAIVDPNGTGYVTF,ALQFVYSK,LAVLQDVDSLLL,DSDGTLNDIQNKLDALR,ILAGDKPYITVEE,NINEIENQILT,VDSINER,LGNRPAYLPT,ILAGDKPYITVEEL,DDPLGNLNLAF,DSDGTLNDIQNK,AAPYNNWLESAR,MMEEYEK,NINEIENQILTR,MAPYEGPDAVPGALDY,AAQELER,GLTEEQMK,DDLENA…	GILETNFNTLQTK,MISDINR,ILAGDKPYITVEELR,SIALTMEGPLEDQLK,LEPLEFQQCLVSLGYDVK,VSWEQLLTAIAR,DSDGTLNDIQNKLDAL,DDPLGNLNLAFEVADK,MASDLLDWISK,GLLDAAWER,LAVLQDVDSLLLE,MDELELVHQDVQEAM,ANVVGEWIK,FAIQDINIEESAAK,LDHLAEK,IMAIVDPNGTGYVTF,ALQFVYSK,DFEDWLLK,LAVLQDVDSLLL,DSDGTLNDIQNKLDALR,ILAGDKPYITVEE,NINEIENQILT,VDSINER,LGNRPAYLPT,MLPWLQDRDSDGTLNDIQNK,ILAGDKPYITVEEL,DSDGTLNDIQNK,AAPYNNWLESAR,NINEIENQILTR,AAQELER,G…	lcl|c234934_g3_i3|m.20432,lcl|c243788_g1_i5|m.31318	lcl|c234934_g3_i3|m.20432,lcl|c243788_g1_i5|m.31318	Q7PKQ5,A5D7D1,P18091,Q08043,Q9JI91,Q7TPR4,Q90734,Q9Z1P2,Q8NF91,P35609,Q2PFV7,P12814,Q9QXQ0,Q0III9,Q5RCS6,L7UZ85,O43707,P57780,P05094,P20111,Q3ZC55,Q3B7N2,O88990	Q7PKQ5,A5D7D1,P18091,Q08043,Q9JI91,Q7TPR4,Q90734,Q9Z1P2,Q8NF91,P35609,Q2PFV7,P12814,Q9QXQ0,Q0III9,Q5RCS6,L7UZ85,O43707,P57780,P05094,P20111,Q3ZC55,Q3B7N2,O88990
GO:0014904	biological_process	myotube cell development	0.0056644	473	0.00429237	351	-0.400148	7.51e-05	0.702	0.00510495	0.00386304	-0.402162	6.79e-05	0.634	0.00435	GILETNFNTLQTK,MISDINR,ILAGDKPYITVEELR,SIALTMEGPLEDQLK,LEPLEFQQCLVSLGYDVK,LAVLQDVDSLLLEFAK,VSWEQLLTAIAR,MASDLLDWISK,GLLDAAWER,MDELELVHQDVQEAM,ANVVGEWIK,FAIQDINIEESAAK,DGLLLWCQR,LDHLAEK,IMAIVDPNGTGYVTF,ALQFVYSK,LAVLQDVDSLLL,DSDGTLNDIQNKLDALR,ILAGDKPYITVEE,NINEIENQILT,VDSINER,LGNRPAYLPT,ILAGDKPYITVEEL,DDPLGNLNLAF,DSDGTLNDIQNK,AAPYNNWLESAR,MMEEYEK,NINEIENQILTR,MAPYEGPDAVPGALDY,AAQELER,GLTEEQMK,DDLENA…	GILETNFNTLQTK,MISDINR,ILAGDKPYITVEELR,SIALTMEGPLEDQLK,LEPLEFQQCLVSLGYDVK,VSWEQLLTAIAR,DSDGTLNDIQNKLDAL,DDPLGNLNLAFEVADK,MASDLLDWISK,GLLDAAWER,LAVLQDVDSLLLE,MDELELVHQDVQEAM,ANVVGEWIK,FAIQDINIEESAAK,LDHLAEK,IMAIVDPNGTGYVTF,ALQFVYSK,DFEDWLLK,LAVLQDVDSLLL,DSDGTLNDIQNKLDALR,ILAGDKPYITVEE,NINEIENQILT,VDSINER,LGNRPAYLPT,MLPWLQDRDSDGTLNDIQNK,ILAGDKPYITVEEL,DSDGTLNDIQNK,AAPYNNWLESAR,NINEIENQILTR,AAQELER,G…	lcl|c234934_g3_i3|m.20432,lcl|c243788_g1_i5|m.31318	lcl|c234934_g3_i3|m.20432,lcl|c243788_g1_i5|m.31318	Q7PKQ5,A5D7D1,P18091,Q08043,Q9JI91,Q7TPR4,Q90734,Q9Z1P2,Q8NF91,P35609,Q2PFV7,P12814,Q9QXQ0,Q0III9,Q5RCS6,L7UZ85,O43707,P57780,P05094,P20111,Q3ZC55,Q3B7N2,O88990	Q7PKQ5,A5D7D1,P18091,Q08043,Q9JI91,Q7TPR4,Q90734,Q9Z1P2,Q8NF91,P35609,Q2PFV7,P12814,Q9QXQ0,Q0III9,Q5RCS6,L7UZ85,O43707,P57780,P05094,P20111,Q3ZC55,Q3B7N2,O88990
GO:0031448	biological_process	positive regulation of fast-twitch skeletal muscle fiber contraction	0.0056644	473	0.00429237	351	-0.400148	7.51e-05	0.702	0.00510495	0.00386304	-0.402162	6.79e-05	0.634	0.00435	GILETNFNTLQTK,MISDINR,ILAGDKPYITVEELR,SIALTMEGPLEDQLK,LEPLEFQQCLVSLGYDVK,LAVLQDVDSLLLEFAK,VSWEQLLTAIAR,MASDLLDWISK,GLLDAAWER,MDELELVHQDVQEAM,ANVVGEWIK,FAIQDINIEESAAK,DGLLLWCQR,LDHLAEK,IMAIVDPNGTGYVTF,ALQFVYSK,LAVLQDVDSLLL,DSDGTLNDIQNKLDALR,ILAGDKPYITVEE,NINEIENQILT,VDSINER,LGNRPAYLPT,ILAGDKPYITVEEL,DDPLGNLNLAF,DSDGTLNDIQNK,AAPYNNWLESAR,MMEEYEK,NINEIENQILTR,MAPYEGPDAVPGALDY,AAQELER,GLTEEQMK,DDLENA…	GILETNFNTLQTK,MISDINR,ILAGDKPYITVEELR,SIALTMEGPLEDQLK,LEPLEFQQCLVSLGYDVK,VSWEQLLTAIAR,DSDGTLNDIQNKLDAL,DDPLGNLNLAFEVADK,MASDLLDWISK,GLLDAAWER,LAVLQDVDSLLLE,MDELELVHQDVQEAM,ANVVGEWIK,FAIQDINIEESAAK,LDHLAEK,IMAIVDPNGTGYVTF,ALQFVYSK,DFEDWLLK,LAVLQDVDSLLL,DSDGTLNDIQNKLDALR,ILAGDKPYITVEE,NINEIENQILT,VDSINER,LGNRPAYLPT,MLPWLQDRDSDGTLNDIQNK,ILAGDKPYITVEEL,DSDGTLNDIQNK,AAPYNNWLESAR,NINEIENQILTR,AAQELER,G…	lcl|c234934_g3_i3|m.20432,lcl|c243788_g1_i5|m.31318	lcl|c234934_g3_i3|m.20432,lcl|c243788_g1_i5|m.31318	Q7PKQ5,A5D7D1,P18091,Q08043,Q9JI91,Q7TPR4,Q90734,Q9Z1P2,Q8NF91,P35609,Q2PFV7,P12814,Q9QXQ0,Q0III9,Q5RCS6,L7UZ85,O43707,P57780,P05094,P20111,Q3ZC55,Q3B7N2,O88990	Q7PKQ5,A5D7D1,P18091,Q08043,Q9JI91,Q7TPR4,Q90734,Q9Z1P2,Q8NF91,P35609,Q2PFV7,P12814,Q9QXQ0,Q0III9,Q5RCS6,L7UZ85,O43707,P57780,P05094,P20111,Q3ZC55,Q3B7N2,O88990
GO:0031446	biological_process	regulation of fast-twitch skeletal muscle fiber contraction	0.0056644	473	0.00429237	351	-0.400148	7.51e-05	0.702	0.00510495	0.00386304	-0.402162	6.79e-05	0.634	0.00435	GILETNFNTLQTK,MISDINR,ILAGDKPYITVEELR,SIALTMEGPLEDQLK,LEPLEFQQCLVSLGYDVK,LAVLQDVDSLLLEFAK,VSWEQLLTAIAR,MASDLLDWISK,GLLDAAWER,MDELELVHQDVQEAM,ANVVGEWIK,FAIQDINIEESAAK,DGLLLWCQR,LDHLAEK,IMAIVDPNGTGYVTF,ALQFVYSK,LAVLQDVDSLLL,DSDGTLNDIQNKLDALR,ILAGDKPYITVEE,NINEIENQILT,VDSINER,LGNRPAYLPT,ILAGDKPYITVEEL,DDPLGNLNLAF,DSDGTLNDIQNK,AAPYNNWLESAR,MMEEYEK,NINEIENQILTR,MAPYEGPDAVPGALDY,AAQELER,GLTEEQMK,DDLENA…	GILETNFNTLQTK,MISDINR,ILAGDKPYITVEELR,SIALTMEGPLEDQLK,LEPLEFQQCLVSLGYDVK,VSWEQLLTAIAR,DSDGTLNDIQNKLDAL,DDPLGNLNLAFEVADK,MASDLLDWISK,GLLDAAWER,LAVLQDVDSLLLE,MDELELVHQDVQEAM,ANVVGEWIK,FAIQDINIEESAAK,LDHLAEK,IMAIVDPNGTGYVTF,ALQFVYSK,DFEDWLLK,LAVLQDVDSLLL,DSDGTLNDIQNKLDALR,ILAGDKPYITVEE,NINEIENQILT,VDSINER,LGNRPAYLPT,MLPWLQDRDSDGTLNDIQNK,ILAGDKPYITVEEL,DSDGTLNDIQNK,AAPYNNWLESAR,NINEIENQILTR,AAQELER,G…	lcl|c234934_g3_i3|m.20432,lcl|c243788_g1_i5|m.31318	lcl|c234934_g3_i3|m.20432,lcl|c243788_g1_i5|m.31318	Q7PKQ5,A5D7D1,P18091,Q08043,Q9JI91,Q7TPR4,Q90734,Q9Z1P2,Q8NF91,P35609,Q2PFV7,P12814,Q9QXQ0,Q0III9,Q5RCS6,L7UZ85,O43707,P57780,P05094,P20111,Q3ZC55,Q3B7N2,O88990	Q7PKQ5,A5D7D1,P18091,Q08043,Q9JI91,Q7TPR4,Q90734,Q9Z1P2,Q8NF91,P35609,Q2PFV7,P12814,Q9QXQ0,Q0III9,Q5RCS6,L7UZ85,O43707,P57780,P05094,P20111,Q3ZC55,Q3B7N2,O88990
GO:2000310	biological_process	regulation of NMDA receptor activity	0.0056644	473	0.00429237	351	-0.400148	7.51e-05	0.702	0.00510495	0.00386304	-0.402162	6.79e-05	0.634	0.00435	GILETNFNTLQTK,MISDINR,ILAGDKPYITVEELR,SIALTMEGPLEDQLK,LEPLEFQQCLVSLGYDVK,LAVLQDVDSLLLEFAK,VSWEQLLTAIAR,MASDLLDWISK,GLLDAAWER,MDELELVHQDVQEAM,ANVVGEWIK,FAIQDINIEESAAK,DGLLLWCQR,LDHLAEK,IMAIVDPNGTGYVTF,ALQFVYSK,LAVLQDVDSLLL,DSDGTLNDIQNKLDALR,ILAGDKPYITVEE,NINEIENQILT,VDSINER,LGNRPAYLPT,ILAGDKPYITVEEL,DDPLGNLNLAF,DSDGTLNDIQNK,AAPYNNWLESAR,MMEEYEK,NINEIENQILTR,MAPYEGPDAVPGALDY,AAQELER,GLTEEQMK,DDLENA…	GILETNFNTLQTK,MISDINR,ILAGDKPYITVEELR,SIALTMEGPLEDQLK,LEPLEFQQCLVSLGYDVK,VSWEQLLTAIAR,DSDGTLNDIQNKLDAL,DDPLGNLNLAFEVADK,MASDLLDWISK,GLLDAAWER,LAVLQDVDSLLLE,MDELELVHQDVQEAM,ANVVGEWIK,FAIQDINIEESAAK,LDHLAEK,IMAIVDPNGTGYVTF,ALQFVYSK,DFEDWLLK,LAVLQDVDSLLL,DSDGTLNDIQNKLDALR,ILAGDKPYITVEE,NINEIENQILT,VDSINER,LGNRPAYLPT,MLPWLQDRDSDGTLNDIQNK,ILAGDKPYITVEEL,DSDGTLNDIQNK,AAPYNNWLESAR,NINEIENQILTR,AAQELER,G…	lcl|c234934_g3_i3|m.20432,lcl|c243788_g1_i5|m.31318	lcl|c234934_g3_i3|m.20432,lcl|c243788_g1_i5|m.31318	Q7PKQ5,A5D7D1,P18091,Q08043,Q9JI91,Q7TPR4,Q90734,Q9Z1P2,Q8NF91,P35609,Q2PFV7,P12814,Q9QXQ0,Q0III9,Q5RCS6,L7UZ85,O43707,P57780,P05094,P20111,Q3ZC55,Q3B7N2,O88990	Q7PKQ5,A5D7D1,P18091,Q08043,Q9JI91,Q7TPR4,Q90734,Q9Z1P2,Q8NF91,P35609,Q2PFV7,P12814,Q9QXQ0,Q0III9,Q5RCS6,L7UZ85,O43707,P57780,P05094,P20111,Q3ZC55,Q3B7N2,O88990
GO:0090324	biological_process	negative regulation of oxidative phosphorylation	0.0056644	473	0.00429237	351	-0.400148	7.51e-05	0.702	0.00510495	0.00386304	-0.402162	6.79e-05	0.634	0.00435	GILETNFNTLQTK,MISDINR,ILAGDKPYITVEELR,SIALTMEGPLEDQLK,LEPLEFQQCLVSLGYDVK,LAVLQDVDSLLLEFAK,VSWEQLLTAIAR,MASDLLDWISK,GLLDAAWER,MDELELVHQDVQEAM,ANVVGEWIK,FAIQDINIEESAAK,DGLLLWCQR,LDHLAEK,IMAIVDPNGTGYVTF,ALQFVYSK,LAVLQDVDSLLL,DSDGTLNDIQNKLDALR,ILAGDKPYITVEE,NINEIENQILT,VDSINER,LGNRPAYLPT,ILAGDKPYITVEEL,DDPLGNLNLAF,DSDGTLNDIQNK,AAPYNNWLESAR,MMEEYEK,NINEIENQILTR,MAPYEGPDAVPGALDY,AAQELER,GLTEEQMK,DDLENA…	GILETNFNTLQTK,MISDINR,ILAGDKPYITVEELR,SIALTMEGPLEDQLK,LEPLEFQQCLVSLGYDVK,VSWEQLLTAIAR,DSDGTLNDIQNKLDAL,DDPLGNLNLAFEVADK,MASDLLDWISK,GLLDAAWER,LAVLQDVDSLLLE,MDELELVHQDVQEAM,ANVVGEWIK,FAIQDINIEESAAK,LDHLAEK,IMAIVDPNGTGYVTF,ALQFVYSK,DFEDWLLK,LAVLQDVDSLLL,DSDGTLNDIQNKLDALR,ILAGDKPYITVEE,NINEIENQILT,VDSINER,LGNRPAYLPT,MLPWLQDRDSDGTLNDIQNK,ILAGDKPYITVEEL,DSDGTLNDIQNK,AAPYNNWLESAR,NINEIENQILTR,AAQELER,G…	lcl|c234934_g3_i3|m.20432,lcl|c243788_g1_i5|m.31318	lcl|c234934_g3_i3|m.20432,lcl|c243788_g1_i5|m.31318	Q7PKQ5,A5D7D1,P18091,Q08043,Q9JI91,Q7TPR4,Q90734,Q9Z1P2,Q8NF91,P35609,Q2PFV7,P12814,Q9QXQ0,Q0III9,Q5RCS6,L7UZ85,O43707,P57780,P05094,P20111,Q3ZC55,Q3B7N2,O88990	Q7PKQ5,A5D7D1,P18091,Q08043,Q9JI91,Q7TPR4,Q90734,Q9Z1P2,Q8NF91,P35609,Q2PFV7,P12814,Q9QXQ0,Q0III9,Q5RCS6,L7UZ85,O43707,P57780,P05094,P20111,Q3ZC55,Q3B7N2,O88990
GO:1900157	biological_process	regulation of bone mineralization involved in bone maturation	0.0056644	473	0.00429237	351	-0.400148	7.51e-05	0.702	0.00510495	0.00386304	-0.402162	6.79e-05	0.634	0.00435	GILETNFNTLQTK,MISDINR,ILAGDKPYITVEELR,SIALTMEGPLEDQLK,LEPLEFQQCLVSLGYDVK,LAVLQDVDSLLLEFAK,VSWEQLLTAIAR,MASDLLDWISK,GLLDAAWER,MDELELVHQDVQEAM,ANVVGEWIK,FAIQDINIEESAAK,DGLLLWCQR,LDHLAEK,IMAIVDPNGTGYVTF,ALQFVYSK,LAVLQDVDSLLL,DSDGTLNDIQNKLDALR,ILAGDKPYITVEE,NINEIENQILT,VDSINER,LGNRPAYLPT,ILAGDKPYITVEEL,DDPLGNLNLAF,DSDGTLNDIQNK,AAPYNNWLESAR,MMEEYEK,NINEIENQILTR,MAPYEGPDAVPGALDY,AAQELER,GLTEEQMK,DDLENA…	GILETNFNTLQTK,MISDINR,ILAGDKPYITVEELR,SIALTMEGPLEDQLK,LEPLEFQQCLVSLGYDVK,VSWEQLLTAIAR,DSDGTLNDIQNKLDAL,DDPLGNLNLAFEVADK,MASDLLDWISK,GLLDAAWER,LAVLQDVDSLLLE,MDELELVHQDVQEAM,ANVVGEWIK,FAIQDINIEESAAK,LDHLAEK,IMAIVDPNGTGYVTF,ALQFVYSK,DFEDWLLK,LAVLQDVDSLLL,DSDGTLNDIQNKLDALR,ILAGDKPYITVEE,NINEIENQILT,VDSINER,LGNRPAYLPT,MLPWLQDRDSDGTLNDIQNK,ILAGDKPYITVEEL,DSDGTLNDIQNK,AAPYNNWLESAR,NINEIENQILTR,AAQELER,G…	lcl|c234934_g3_i3|m.20432,lcl|c243788_g1_i5|m.31318	lcl|c234934_g3_i3|m.20432,lcl|c243788_g1_i5|m.31318	Q7PKQ5,A5D7D1,P18091,Q08043,Q9JI91,Q7TPR4,Q90734,Q9Z1P2,Q8NF91,P35609,Q2PFV7,P12814,Q9QXQ0,Q0III9,Q5RCS6,L7UZ85,O43707,P57780,P05094,P20111,Q3ZC55,Q3B7N2,O88990	Q7PKQ5,A5D7D1,P18091,Q08043,Q9JI91,Q7TPR4,Q90734,Q9Z1P2,Q8NF91,P35609,Q2PFV7,P12814,Q9QXQ0,Q0III9,Q5RCS6,L7UZ85,O43707,P57780,P05094,P20111,Q3ZC55,Q3B7N2,O88990
GO:1900159	biological_process	positive regulation of bone mineralization involved in bone maturation	0.0056644	473	0.00429237	351	-0.400148	7.51e-05	0.702	0.00510495	0.00386304	-0.402162	6.79e-05	0.634	0.00435	GILETNFNTLQTK,MISDINR,ILAGDKPYITVEELR,SIALTMEGPLEDQLK,LEPLEFQQCLVSLGYDVK,LAVLQDVDSLLLEFAK,VSWEQLLTAIAR,MASDLLDWISK,GLLDAAWER,MDELELVHQDVQEAM,ANVVGEWIK,FAIQDINIEESAAK,DGLLLWCQR,LDHLAEK,IMAIVDPNGTGYVTF,ALQFVYSK,LAVLQDVDSLLL,DSDGTLNDIQNKLDALR,ILAGDKPYITVEE,NINEIENQILT,VDSINER,LGNRPAYLPT,ILAGDKPYITVEEL,DDPLGNLNLAF,DSDGTLNDIQNK,AAPYNNWLESAR,MMEEYEK,NINEIENQILTR,MAPYEGPDAVPGALDY,AAQELER,GLTEEQMK,DDLENA…	GILETNFNTLQTK,MISDINR,ILAGDKPYITVEELR,SIALTMEGPLEDQLK,LEPLEFQQCLVSLGYDVK,VSWEQLLTAIAR,DSDGTLNDIQNKLDAL,DDPLGNLNLAFEVADK,MASDLLDWISK,GLLDAAWER,LAVLQDVDSLLLE,MDELELVHQDVQEAM,ANVVGEWIK,FAIQDINIEESAAK,LDHLAEK,IMAIVDPNGTGYVTF,ALQFVYSK,DFEDWLLK,LAVLQDVDSLLL,DSDGTLNDIQNKLDALR,ILAGDKPYITVEE,NINEIENQILT,VDSINER,LGNRPAYLPT,MLPWLQDRDSDGTLNDIQNK,ILAGDKPYITVEEL,DSDGTLNDIQNK,AAPYNNWLESAR,NINEIENQILTR,AAQELER,G…	lcl|c234934_g3_i3|m.20432,lcl|c243788_g1_i5|m.31318	lcl|c234934_g3_i3|m.20432,lcl|c243788_g1_i5|m.31318	Q7PKQ5,A5D7D1,P18091,Q08043,Q9JI91,Q7TPR4,Q90734,Q9Z1P2,Q8NF91,P35609,Q2PFV7,P12814,Q9QXQ0,Q0III9,Q5RCS6,L7UZ85,O43707,P57780,P05094,P20111,Q3ZC55,Q3B7N2,O88990	Q7PKQ5,A5D7D1,P18091,Q08043,Q9JI91,Q7TPR4,Q90734,Q9Z1P2,Q8NF91,P35609,Q2PFV7,P12814,Q9QXQ0,Q0III9,Q5RCS6,L7UZ85,O43707,P57780,P05094,P20111,Q3ZC55,Q3B7N2,O88990
GO:0048633	biological_process	positive regulation of skeletal muscle tissue growth	0.0056644	473	0.00429237	351	-0.400148	7.51e-05	0.702	0.00510495	0.00386304	-0.402162	6.79e-05	0.634	0.00435	GILETNFNTLQTK,MISDINR,ILAGDKPYITVEELR,SIALTMEGPLEDQLK,LEPLEFQQCLVSLGYDVK,LAVLQDVDSLLLEFAK,VSWEQLLTAIAR,MASDLLDWISK,GLLDAAWER,MDELELVHQDVQEAM,ANVVGEWIK,FAIQDINIEESAAK,DGLLLWCQR,LDHLAEK,IMAIVDPNGTGYVTF,ALQFVYSK,LAVLQDVDSLLL,DSDGTLNDIQNKLDALR,ILAGDKPYITVEE,NINEIENQILT,VDSINER,LGNRPAYLPT,ILAGDKPYITVEEL,DDPLGNLNLAF,DSDGTLNDIQNK,AAPYNNWLESAR,MMEEYEK,NINEIENQILTR,MAPYEGPDAVPGALDY,AAQELER,GLTEEQMK,DDLENA…	GILETNFNTLQTK,MISDINR,ILAGDKPYITVEELR,SIALTMEGPLEDQLK,LEPLEFQQCLVSLGYDVK,VSWEQLLTAIAR,DSDGTLNDIQNKLDAL,DDPLGNLNLAFEVADK,MASDLLDWISK,GLLDAAWER,LAVLQDVDSLLLE,MDELELVHQDVQEAM,ANVVGEWIK,FAIQDINIEESAAK,LDHLAEK,IMAIVDPNGTGYVTF,ALQFVYSK,DFEDWLLK,LAVLQDVDSLLL,DSDGTLNDIQNKLDALR,ILAGDKPYITVEE,NINEIENQILT,VDSINER,LGNRPAYLPT,MLPWLQDRDSDGTLNDIQNK,ILAGDKPYITVEEL,DSDGTLNDIQNK,AAPYNNWLESAR,NINEIENQILTR,AAQELER,G…	lcl|c234934_g3_i3|m.20432,lcl|c243788_g1_i5|m.31318	lcl|c234934_g3_i3|m.20432,lcl|c243788_g1_i5|m.31318	Q7PKQ5,A5D7D1,P18091,Q08043,Q9JI91,Q7TPR4,Q90734,Q9Z1P2,Q8NF91,P35609,Q2PFV7,P12814,Q9QXQ0,Q0III9,Q5RCS6,L7UZ85,O43707,P57780,P05094,P20111,Q3ZC55,Q3B7N2,O88990	Q7PKQ5,A5D7D1,P18091,Q08043,Q9JI91,Q7TPR4,Q90734,Q9Z1P2,Q8NF91,P35609,Q2PFV7,P12814,Q9QXQ0,Q0III9,Q5RCS6,L7UZ85,O43707,P57780,P05094,P20111,Q3ZC55,Q3B7N2,O88990
GO:0035357	biological_process	peroxisome proliferator activated receptor signaling pathway	0.0056644	473	0.00429237	351	-0.400148	7.51e-05	0.702	0.00510495	0.00386304	-0.402162	6.79e-05	0.634	0.00435	GILETNFNTLQTK,MISDINR,ILAGDKPYITVEELR,SIALTMEGPLEDQLK,LEPLEFQQCLVSLGYDVK,LAVLQDVDSLLLEFAK,VSWEQLLTAIAR,MASDLLDWISK,GLLDAAWER,MDELELVHQDVQEAM,ANVVGEWIK,FAIQDINIEESAAK,DGLLLWCQR,LDHLAEK,IMAIVDPNGTGYVTF,ALQFVYSK,LAVLQDVDSLLL,DSDGTLNDIQNKLDALR,ILAGDKPYITVEE,NINEIENQILT,VDSINER,LGNRPAYLPT,ILAGDKPYITVEEL,DDPLGNLNLAF,DSDGTLNDIQNK,AAPYNNWLESAR,MMEEYEK,NINEIENQILTR,MAPYEGPDAVPGALDY,AAQELER,GLTEEQMK,DDLENA…	GILETNFNTLQTK,MISDINR,ILAGDKPYITVEELR,SIALTMEGPLEDQLK,LEPLEFQQCLVSLGYDVK,VSWEQLLTAIAR,DSDGTLNDIQNKLDAL,DDPLGNLNLAFEVADK,MASDLLDWISK,GLLDAAWER,LAVLQDVDSLLLE,MDELELVHQDVQEAM,ANVVGEWIK,FAIQDINIEESAAK,LDHLAEK,IMAIVDPNGTGYVTF,ALQFVYSK,DFEDWLLK,LAVLQDVDSLLL,DSDGTLNDIQNKLDALR,ILAGDKPYITVEE,NINEIENQILT,VDSINER,LGNRPAYLPT,MLPWLQDRDSDGTLNDIQNK,ILAGDKPYITVEEL,DSDGTLNDIQNK,AAPYNNWLESAR,NINEIENQILTR,AAQELER,G…	lcl|c234934_g3_i3|m.20432,lcl|c243788_g1_i5|m.31318	lcl|c234934_g3_i3|m.20432,lcl|c243788_g1_i5|m.31318	Q7PKQ5,A5D7D1,P18091,Q08043,Q9JI91,Q7TPR4,Q90734,Q9Z1P2,Q8NF91,P35609,Q2PFV7,P12814,Q9QXQ0,Q0III9,Q5RCS6,L7UZ85,O43707,P57780,P05094,P20111,Q3ZC55,Q3B7N2,O88990	Q7PKQ5,A5D7D1,P18091,Q08043,Q9JI91,Q7TPR4,Q90734,Q9Z1P2,Q8NF91,P35609,Q2PFV7,P12814,Q9QXQ0,Q0III9,Q5RCS6,L7UZ85,O43707,P57780,P05094,P20111,Q3ZC55,Q3B7N2,O88990
GO:0030500	biological_process	regulation of bone mineralization	0.00619132	517	0.00475707	389	-0.380173	7.87e-05	0.736	0.00557883	0.00428007	-0.382328	7.06e-05	0.66	0.00446	GILETNFNTLQTK,ILAGDKPYITVEELR,LEPLEFQQCLVSLGYDVK,LAVLQDVDSLLLEFAK,MASDLLDWISK,MDELELVHQDVQEAM,ANVVGEWIK,FAIQDINIEESAAK,QTTDQGSYTPLDNASVGLK,TCADNDECANPEINK,IMAIVDPNGTGYVTF,ALQFVYSK,DSDGTLNDIQNKLDALR,ILAGDKPYITVEE,FNTLTGNLLNGEEVNR,IAVIPFSTDAK,ILAGDKPYITVEEL,SGTPGSIQR,AAQELER,AWGNLEASEK,CLTGYQGSGR,MLDAEEMVNMAKPDER,LAVLQDVDSLL,VLTINKDNEK,LGNRPAYLPTEGK,MLPWLQDR,IADFGLAR,VVTGQLQPNR,MISDINR,SIALTMEGPLED…	GILETNFNTLQTK,ILAGDKPYITVEELR,LEPLEFQQCLVSLGYDVK,DDPLGNLNLAFEVADK,MASDLLDWISK,MDELELVHQDVQEAM,ANVVGEWIK,FAIQDINIEESAAK,QTTDQGSYTPLDNASVGLK,TCADNDECANPEINK,IMAIVDPNGTGYVTF,ALQFVYSK,DSDGTLNDIQNKLDALR,ILAGDKPYITVEE,FNTLTGNLLNGEEVNR,IAVIPFSTDAK,MLPWLQDRDSDGTLNDIQNK,ILAGDKPYITVEEL,AAQELER,AWGNLEASEK,CLTGYQGSGR,MLDAEEMVNMAKPDER,LAVLQDVDSLL,CQYICDEWAK,VLTINKDNEK,LGNRPAYLPTEGK,MLPWLQDR,IADFGLAR,VVTGQLQPN…	lcl|c226782_g6_i6|m.11785,lcl|c240483_g1_i8|m.27301,lcl|c235052_g1_i3|m.20523,lcl|c221061_g4_i1|m.7355,lcl|c235052_g1_i4|m.20524,lcl|c226176_g1_i2|m.11271,lcl|c221061_g4_i2|m.7358,lcl|c230419_g4_i2|m.15278,lcl|c235052_g1_i6|m.20525,lcl|c232719_g2_i1|m.17712,lcl|c226782_g6_i4|m.11783,lcl|c213237_g2_i2|m.2995,lcl|c230419_g4_i1|m.15277,lcl|c226782_g6_i5|m.11784,lcl|c221431_g3_i2|m.7619,lcl|c230419_g…	lcl|c226782_g6_i6|m.11785,lcl|c240483_g1_i8|m.27301,lcl|c235052_g1_i3|m.20523,lcl|c221061_g4_i1|m.7355,lcl|c235052_g1_i4|m.20524,lcl|c226176_g1_i2|m.11271,lcl|c221061_g4_i2|m.7358,lcl|c235052_g1_i6|m.20525,lcl|c232719_g2_i1|m.17712,lcl|c226782_g6_i4|m.11783,lcl|c213237_g2_i2|m.2995,lcl|c226782_g6_i5|m.11784,lcl|c221431_g3_i2|m.7619,lcl|c233141_g1_i1|m.18196,lcl|c213203_g1_i1|m.2991,lcl|c234378_g4…	Q61851,Q61555,A5D7D1,Q08043,Q7TPR4,Q90734,O64771,Q9Z1P2,Q2PFV7,P18460,P12814,Q3UMM4,Q0III9,L7UZ85,Q00535,Q5ZKN1,Q00534,P05094,P43450,Q8N165,Q6NU47,O22042,P20111,P20794,O88990,Q7PKQ5,P18091,Q9JI91,O00339,Q7T6X2,Q16832,Q8NF91,P35609,A8WIP6,Q62371,Q9QXQ0,Q5RCS6,O43707,P57780,P22607,A4UTP7,Q6FN53,P08630,P27636,Q3ZC55,Q6P3Q4,Q3B7N2	Q61851,Q61555,A5D7D1,Q08043,Q7TPR4,Q90734,O64771,Q9Z1P2,Q2PFV7,P18460,P12814,Q3UMM4,Q0III9,L7UZ85,Q00535,Q5ZKN1,Q00534,P05094,P43450,Q8N165,Q6NU47,O22042,P20111,P20794,O88990,Q7PKQ5,P18091,Q9JI91,O00339,Q7T6X2,Q8NF91,P35609,A8WIP6,Q9QXQ0,Q5RCS6,O43707,P57780,P22607,A4UTP7,Q6FN53,P08630,P27636,Q3ZC55,Q6P3Q4,Q3B7N2
GO:0031333	biological_process	negative regulation of protein complex assembly	0.034669	2895	0.031245	2555	-0.150019	9.72e-05	0.909	0.0311898	0.0280509	-0.153024	7.21e-05	0.674	0.00449	VGVVNDLGGQLVDK,ENLLTDDLGR,HNLEQQIQAR,AWEGAGQEPGLK,ATDLTTATR,YDNLMQQAAQR,NISFNDKK,APEEVLR,SGQDLLDSGHY,GGADSGFNKVEEK,VFTYWK,QEAFLADDNLGDSLDGVEALIR,GQELVDSDHSEK,LESDANQLCSEYQGEPEEPIIR,VELDSDEPVII,DHQAELEGAYNELLQLAAAR,FEGFQQELNANEK,VEPTDYKPR,QLNPNTTVK,LGDAQKQEDFNTGVK,QGFVPAAYVK,EIPGAYDYK,EPSEYDILHIQNQK,ITEAEKNER,LTTFELR,SEEDRITEAEKNER,NVDNRYDNLMQQAAQR,SAIGEGMTR,HPLDSASTDLLEVSR,NIQENLVDK,EEAIEEYLK,DLA…	HSLVEADIAAQADR,ENLLTDDLGR,SGQDLLDSGHY,GGADSGFNKVEEK,VFTYWK,GQELVDSDHSEK,QEAFLADDNLGDSLDGVEALIR,DHYATPEINEK,DHQAELEGAYNELLQLAAAR,TQDLQEKYDNLK,VEPTDYKPR,QLNPNTTVK,QGFVPAAYVK,EIPGAYDYK,EPSEYDILHIQNQK,LTTFELR,SEEDRITEAEKNER,NVDNRYDNLMQQAAQR,EQIDEIKTK,SKVDVVDGDNWESK,TAAFLIPILSR,MLLFTQK,SWISEKDTALSTSDYGR,ETWLNENQR,ETENVGSSQEVINAFK,TLAVQDVK,DKVLSSDDYGK,RLAELVK,GHLDDSLQAQQ,DKTDAGEKSEK,KLEDSIQR,IAPSSVGQQE…	lcl|c241874_g1_i8|m.29086,lcl|c224583_g1_i1|m.9971,lcl|c238429_g5_i1|m.24515,lcl|c229592_g3_i11|m.14442,lcl|c224583_g1_i3|m.9976,lcl|c224029_g4_i2|m.9565,lcl|c241874_g1_i8|m.29081,lcl|c210342_g3_i4|m.2163,lcl|c241874_g1_i8|m.29082,lcl|c223941_g1_i4|m.9486,lcl|c224029_g4_i1|m.9563,lcl|c224583_g1_i13|m.9974,lcl|c222307_g1_i1|m.8241,lcl|c242633_g1_i1|m.30058,lcl|c223941_g1_i2|m.9485,lcl|c241874_g1_i…	lcl|c241874_g1_i8|m.29086,lcl|c224583_g1_i1|m.9971,lcl|c233521_g3_i3|m.18674,lcl|c238429_g5_i1|m.24515,lcl|c229592_g3_i11|m.14442,lcl|c224583_g1_i3|m.9976,lcl|c224029_g4_i2|m.9565,lcl|c237832_g1_i6|m.23803,lcl|c241874_g1_i8|m.29081,lcl|c210342_g3_i4|m.2163,lcl|c241874_g1_i8|m.29082,lcl|c223941_g1_i4|m.9486,lcl|c224029_g4_i1|m.9563,lcl|c238429_g5_i5|m.24520,lcl|c224583_g1_i13|m.9974,lcl|c242633_g1…	Q9NYL9,P52034,Q76NU1,Q4X195,P12931,Q5RAG9,P12382,Q02977,Q4R6M5,Q5RJR2,P62998,P62999,C4QXA5,Q91YR1,P07751,Q9W2N0,Q9HGZ1,Q19626,Q2KJ93,Q5R507,Q43433,P13116,Q01082,P13115,P39688,Q43432,P11574,A1A4J1,P17713,P40792,Q9R0A0,Q2U070,Q92841,O15523,Q867C9,Q8TGA0,Q92448,O15020,Q61656,Q13813,P62815,P47860,P15508,P79136,P18461,P34147,Q27665,Q40079,Q40078,Q5R5V5,Q27778,Q8IXJ6,P47858,P47859,P06241,Q5XI32,P40429,…	Q9NYL9,Q76NU1,Q4X195,P12931,Q02977,Q4R6M5,Q5RJR2,P62998,P62999,Q91YR1,P07751,Q9W2N0,Q91757,Q19626,Q2KJ93,Q5R507,Q43433,P13116,Q01082,P13115,P39688,Q43432,P11574,P17713,P40792,Q9R0A0,Q2U070,Q92841,O15523,Q62622,O15020,Q61656,Q13813,P62815,P15508,P79136,P18461,P59644,Q40079,Q40078,Q5R5V5,Q8BKF1,P06241,Q5XI32,P40429,Q38681,Q38680,P22550,P62814,P27446,Q9WUD9,Q9WV60,Q5YJC2,Q9H254,Q02790,P11277,Q26976,…
GO:0048384	biological_process	retinoic acid receptor signaling pathway	0.00704158	588	0.00551527	451	-0.352468	8.67e-05	0.81	0.0063435	0.00496049	-0.354795	7.69e-05	0.719	0.00467	GILETNFNTLQTK,ILAGDKPYITVEELR,LEPLEFQQCLVSLGYDVK,LAVLQDVDSLLLEFAK,MASDLLDWISK,IMDLIDSGNKEGANLL,NTTLELGGK,MDELELVHQDVQEAM,ANVVGEWIK,FAIQDINIEESAAK,ELGEYGLQQYSEVK,TIPVDGNFLCYTR,IMAIVDPNGTGYVTF,ALQFVYSK,VVGDPFDLK,DSDGTLNDIQNKLDALR,ILAGDKPYITVEE,TEQGPQVDGEQLAK,ILAGDKPYITVEEL,AAQELER,AWGNLEASEK,AASSSNVLPVQLDSQGR,MLDAEEMVNMAKPDER,LAVLQDVDSLL,IMDLIDSGNKEGANL,VLTINKDNEK,LGNRPAYLPTEGK,VVGDPFDLKTEQGPQVDGEQ…	GILETNFNTLQTK,ILAGDKPYITVEELR,LEPLEFQQCLVSLGYDVK,DDPLGNLNLAFEVADK,MASDLLDWISK,IMDLIDSGNKEGANLL,NTTLELGGK,MDELELVHQDVQEAM,ANVVGEWIK,FAIQDINIEESAAK,ELGEYGLQQYSEVK,IMAIVDPNGTGYVTF,ALQFVYSK,VVGDPFDLK,DSDGTLNDIQNKLDALR,ILAGDKPYITVEE,TEQGPQVDGEQLAK,MLPWLQDRDSDGTLNDIQNK,ILAGDKPYITVEEL,FKDLDDLIDR,AAQELER,AWGNLEASEK,AASSSNVLPVQLDSQGR,MLDAEEMVNMAKPDER,LAVLQDVDSLL,CQYICDEWAK,VLTINKDNEK,LGNRPAYLPTEGK,VVGDPFD…	lcl|c229881_g6_i6|m.14719,lcl|c234934_g3_i3|m.20432,lcl|c227548_g2_i4|m.12564,lcl|c243788_g1_i5|m.31318,lcl|c203735_g1_i1|m.1335	lcl|c229881_g6_i6|m.14719,lcl|c234934_g3_i3|m.20432,lcl|c227548_g2_i4|m.12564,lcl|c243788_g1_i5|m.31318,lcl|c203735_g1_i1|m.1335	Q08043,P30841,Q2PFV7,Q9CZS1,P12814,O94788,Q8HYE4,P11884,L7UZ85,Q5R6B5,P05091,P05094,P48644,P20111,P86886,Q1JQE0,Q7PKQ5,O93344,P18091,Q8NF91,P35609,P30837,Q5RAM2,P57780,P20000,Q8MI17,Q3ZC55,Q3B7N2,Q13573,Q62148,A5D7D1,Q7TPR4,Q90734,Q66HF8,Q9Z1P2,P81178,Q63639,P51647,P13601,Q28399,Q0III9,P47738,Q5R7R9,P47895,O88990,O35945,Q29490,Q9CSN1,Q9JI91,P27463,Q9I8W8,P51977,P15437,Q9QXQ0,P12762,Q5RCS6,Q5RF00,…	Q08043,P30841,Q2PFV7,Q9CZS1,P12814,O94788,Q8HYE4,P11884,L7UZ85,Q5R6B5,P05091,P05094,P48644,P20111,P86886,Q1JQE0,Q7PKQ5,O93344,P18091,Q8NF91,P35609,P30837,Q5RAM2,P57780,P20000,Q8MI17,Q3ZC55,Q3B7N2,Q13573,Q62148,A5D7D1,Q7TPR4,Q90734,Q66HF8,Q9Z1P2,P81178,Q63639,P51647,P13601,Q28399,Q0III9,P47738,Q5R7R9,P47895,O88990,O35945,Q29490,Q9CSN1,Q9JI91,P27463,Q9I8W8,P51977,P15437,Q9QXQ0,P12762,Q5RCS6,Q5RF00,…
GO:0030049	biological_process	muscle filament sliding	0.0056644	473	0.0043046	352	-0.396044	8.79e-05	0.821	0.00510495	0.00387401	-0.398069	7.95e-05	0.743	0.00476	GILETNFNTLQTK,MISDINR,ILAGDKPYITVEELR,SIALTMEGPLEDQLK,LEPLEFQQCLVSLGYDVK,LAVLQDVDSLLLEFAK,VSWEQLLTAIAR,MASDLLDWISK,GLLDAAWER,MDELELVHQDVQEAM,ANVVGEWIK,FAIQDINIEESAAK,DGLLLWCQR,LDHLAEK,IMAIVDPNGTGYVTF,ALQFVYSK,LAVLQDVDSLLL,DSDGTLNDIQNKLDALR,ILAGDKPYITVEE,NINEIENQILT,VDSINER,LGNRPAYLPT,ILAGDKPYITVEEL,DDPLGNLNLAF,DSDGTLNDIQNK,AAPYNNWLESAR,MMEEYEK,NINEIENQILTR,MAPYEGPDAVPGALDY,AAQELER,GLTEEQMK,DDLENA…	GILETNFNTLQTK,MISDINR,ILAGDKPYITVEELR,SIALTMEGPLEDQLK,LEPLEFQQCLVSLGYDVK,VSWEQLLTAIAR,DSDGTLNDIQNKLDAL,DDPLGNLNLAFEVADK,MASDLLDWISK,GLLDAAWER,LAVLQDVDSLLLE,MDELELVHQDVQEAM,ANVVGEWIK,FAIQDINIEESAAK,LDHLAEK,IMAIVDPNGTGYVTF,ALQFVYSK,DFEDWLLK,LAVLQDVDSLLL,DSDGTLNDIQNKLDALR,ILAGDKPYITVEE,NINEIENQILT,VDSINER,LGNRPAYLPT,MLPWLQDRDSDGTLNDIQNK,ILAGDKPYITVEEL,DSDGTLNDIQNK,AAPYNNWLESAR,NINEIENQILTR,AAQELER,G…	lcl|c234934_g3_i3|m.20432,lcl|c243788_g1_i5|m.31318	lcl|c234934_g3_i3|m.20432,lcl|c206182_g1_i1|m.1515,lcl|c243788_g1_i5|m.31318	Q7PKQ5,A5D7D1,P18091,Q08043,Q9JI91,Q7TPR4,Q90734,Q9Z1P2,Q8NF91,P35609,Q2PFV7,P12814,Q9QXQ0,Q0III9,Q5RCS6,L7UZ85,O43707,P57780,P05094,P20111,Q3ZC55,Q3B7N2,O88990	P54357,A5D7D1,Q08043,Q7TPR4,Q90734,Q9Z1P2,Q2PFV7,P12814,Q0III9,L7UZ85,P05094,Q60605,P20111,O88990,Q7PKQ5,P18091,Q9JI91,Q5R844,Q8NF91,P35609,Q9QXQ0,Q5RCS6,O43707,P60661,P57780,P60660,Q3ZC55,P60662,Q3B7N2
GO:0014819	biological_process	regulation of skeletal muscle contraction	0.00597576	499	0.00458587	375	-0.381928	9.81e-05	0.917	0.00538497	0.00412643	-0.384046	8.83e-05	0.826	0.00502	GILETNFNTLQTK,ILAGDKPYITVEELR,LEPLEFQQCLVSLGYDVK,LAVLQDVDSLLLEFAK,MASDLLDWISK,QEGGQEALNK,MDELELVHQDVQEAM,ANVVGEWIK,FAIQDINIEESAAK,IMAIVDPNGTGYVTF,ALQFVYSK,DSDGTLNDIQNKLDALR,ILAGDKPYITVEE,ILAGDKPYITVEEL,AAQELER,AWGNLEASEK,MLDAEEMVNMAKPDER,LAVLQDVDSLL,VLTINKDNEK,LGNRPAYLPTEGK,MLPWLQDR,QEGGQDALNK,MISDINR,SIALTMEGPLEDQLK,VSWEQLLTAIAR,YLAGDPDSQLIGIDKDP,GLLDAAWER,DGLLLWCQR,LDHLAEK,IPYECVNINLK,LAVLQDVDS…	GILETNFNTLQTK,ILAGDKPYITVEELR,LEPLEFQQCLVSLGYDVK,DDPLGNLNLAFEVADK,MASDLLDWISK,QEGGQEALNK,MDELELVHQDVQEAM,ANVVGEWIK,FAIQDINIEESAAK,IMAIVDPNGTGYVTF,ALQFVYSK,DSDGTLNDIQNKLDALR,ILAGDKPYITVEE,MLPWLQDRDSDGTLNDIQNK,ILAGDKPYITVEEL,AAQELER,AWGNLEASEK,MLDAEEMVNMAKPDER,LAVLQDVDSLL,CQYICDEWAK,VLTINKDNEK,LGNRPAYLPTEGK,MLPWLQDR,QEGGQDALNK,ILVETLGSAIVSAFYK,MISDINR,SIALTMEGPLEDQLK,DSDGTLNDIQNKLDAL,VSWEQLLTAIAR,Y…	lcl|c223629_g2_i1|m.9258,lcl|c234934_g3_i3|m.20432,lcl|c223629_g2_i2|m.9260,lcl|c223629_g2_i3|m.9261,lcl|c243788_g1_i5|m.31318	lcl|c223629_g2_i1|m.9258,lcl|c234934_g3_i3|m.20432,lcl|c223629_g2_i2|m.9260,lcl|c223629_g2_i3|m.9261,lcl|c243788_g1_i5|m.31318	Q7PKQ5,A5D7D1,P18091,Q08043,Q9JI91,Q7TPR4,Q90734,Q9Z1P2,Q8NF91,P35609,Q2PFV7,P12814,P78417,Q9QXQ0,Q0III9,Q5RCS6,L7UZ85,O43707,P57780,P05094,P20111,Q3ZC55,Q3B7N2,O88990	Q7PKQ5,A5D7D1,P18091,Q08043,Q9JI91,Q7TPR4,Q90734,Q9Z1P2,Q8NF91,P35609,Q2PFV7,P12814,P78417,Q9QXQ0,Q0III9,Q5RCS6,L7UZ85,O43707,P57780,P05094,P20111,Q3ZC55,Q3B7N2,O88990
GO:0043465	biological_process	regulation of fermentation	0.00589193	492	0.00451249	369	-0.384817	9.82e-05	0.918	0.00530958	0.00406058	-0.386913	8.86e-05	0.828	0.00502	STSIPSSGQK,GILETNFNTLQTK,ILAGDKPYITVEELR,LEPLEFQQCLVSLGYDVK,LAVLQDVDSLLLEFAK,MASDLLDWISK,GLLPQLVGVAPEK,MDELELVHQDVQEAM,ANVVGEWIK,FAIQDINIEESAAK,YMTPENLIR,IMAIVDPNGTGYVTF,ALQFVYSK,DSDGTLNDIQNKLDALR,ILAGDKPYITVEE,ILAGDKPYITVEEL,QADPSQLTIIFNK,ISYGYYR,AAQELER,AWGNLEASEK,MLDAEEMVNMAKPDER,LAVLQDVDSLL,VLTINKDNEK,LGNRPAYLPTEGK,EGQQTYR,MLPWLQDR,MISDINR,SIALTMEGPLEDQLK,VSWEQLLTAIAR,GLLDAAWER,DGLLLWCQR,LDHL…	STSIPSSGQK,GILETNFNTLQTK,ILAGDKPYITVEELR,LEPLEFQQCLVSLGYDVK,DDPLGNLNLAFEVADK,MASDLLDWISK,GLLPQLVGVAPEK,MDELELVHQDVQEAM,ANVVGEWIK,FAIQDINIEESAAK,YMTPENLIR,IMAIVDPNGTGYVTF,ALQFVYSK,DSDGTLNDIQNKLDALR,ILAGDKPYITVEE,MLPWLQDRDSDGTLNDIQNK,ILAGDKPYITVEEL,IVFQLFDLDGK,AAQELER,AWGNLEASEK,MLDAEEMVNMAKPDER,LAVLQDVDSLL,CQYICDEWAK,VLTINKDNEK,LGNRPAYLPTEGK,EGQQTYR,MLPWLQDR,MISDINR,SIALTMEGPLEDQLK,DSDGTLNDIQNKLDA…	lcl|c236234_g4_i6|m.21880,lcl|c234934_g3_i3|m.20432,lcl|c236234_g4_i1|m.21876,lcl|c236234_g4_i13|m.21879,lcl|c243788_g1_i5|m.31318,lcl|c236234_g4_i10|m.21877	lcl|c236234_g4_i6|m.21880,lcl|c234934_g3_i3|m.20432,lcl|c236234_g4_i1|m.21876,lcl|c236234_g4_i13|m.21879,lcl|c243788_g1_i5|m.31318,lcl|c236234_g4_i10|m.21877	Q5RBC8,A5D7D1,Q08043,Q7TPR4,Q90734,O75746,Q9Z1P2,Q2PFV7,P12814,Q9QXX4,Q0III9,L7UZ85,P05094,P20111,Q9UJS0,Q8BH59,O88990,Q7PKQ5,P18091,Q9JI91,Q8NF91,P35609,Q9QXQ0,Q5RCS6,O43707,P57780,Q3ZC55,Q3B7N2,Q8HXW2	Q5RBC8,A5D7D1,Q08043,Q7TPR4,Q90734,O75746,Q9Z1P2,Q2PFV7,P12814,Q9QXX4,Q0III9,L7UZ85,P05094,P20111,Q9UJS0,Q8BH59,O88990,Q7PKQ5,P18091,Q9JI91,Q8NF91,P35609,Q9QXQ0,Q5RCS6,O43707,P57780,Q3ZC55,Q3B7N2,Q8HXW2
GO:0120192	biological_process	tight junction assembly	0.00923309	771	0.00749636	613	-0.300623	0.000107	1	0.0083144	0.00673837	-0.303212	9.28e-05	0.868	0.00502	QSVTDSMTR,TGAASSSSASSPAVQELR,KLMEEVETIK,MDELELVHQDVQEAM,FAIQDINIEESAAK,IMAIVDPNGTGYVTF,ALQFVYSK,KDSENEQTSDVEPS,TSFSEGSGGR,QGAIVAVTGDGVNDSPALKR,LGQVESWAQK,AWGNLEASEK,DGSSISSDSDSQK,MLDAEEMVNMAKPDER,LAVLQDVDSLL,MLPWLQDR,VQQDDMAVK,TSDLVFAR,MISDINR,LIIVEGCQR,VSWEQLLTAIAR,LTEEQAQK,YVELSEGSVK,NINEIENQILT,VDSINER,LGNRPAYLPT,VIMVTGDHPITAK,ALNNSSDAETTR,LNIPVEEVDPR,DSDGTLNDIQNK,NLVPQEAHVLR,DALEQDLK,NLVPQEAH…	QSVTDSMTR,EKQAGQAATER,VAEIPFNSTNKY,GILETNFNTLQTK,TGAASSSSASSPAVQELR,ILAGDKPYITVEELR,LEPLEFQQCLVSLGYDVK,DDPLGNLNLAFEVADK,MASDLLDWISK,GSSEEKENLFGR,ILVVGNSK,MDELELVHQDVQEAM,ANVVGEWIK,VATTPLVDDGSK,FAIQDINIEESAAK,SGGIPALVR,AVDWEQLEAR,LIFDNLK,GVGIISEGTETKEDVAAR,IMAIVDPNGTGYVTF,ALQFVYSK,DSDGTLNDIQNKLDALR,ILAGDKPYITVEE,GVGIISEGTETK,TSFSEGSGGR,DPLNDKLVNER,MLPWLQDRDSDGTLNDIQNK,NLVPQEAHV,ILAGDKPYITVEEL,QGAI…	lcl|c241349_g1_i1|m.28471,lcl|c213652_g3_i1|m.3162,lcl|c242839_g1_i1|m.30268,lcl|c233287_g2_i1|m.18368,lcl|c234934_g3_i3|m.20432,lcl|c222667_g10_i4|m.8510,lcl|c217788_g4_i2|m.5364,lcl|c222950_g5_i5|m.8734,lcl|c220863_g2_i3|m.7207,lcl|c222950_g5_i5|m.8735,lcl|c243788_g1_i5|m.31318,lcl|c222950_g5_i7|m.8739	lcl|c224520_g2_i6|m.9890,lcl|c222667_g10_i4|m.8510,lcl|c222950_g5_i5|m.8734,lcl|c234780_g1_i1|m.20238,lcl|c222950_g5_i5|m.8735,lcl|c224520_g2_i1|m.9889,lcl|c243788_g1_i5|m.31318,lcl|c222950_g5_i7|m.8739,lcl|c241349_g1_i1|m.28471,lcl|c213652_g3_i1|m.3162,lcl|c242839_g1_i1|m.30268,lcl|c233287_g2_i1|m.18368,lcl|c234934_g3_i3|m.20432,lcl|c217788_g4_i2|m.5364,lcl|c220863_g2_i3|m.7207	Q08043,P27112,P12814,Q29I35,Q64541,Q64392,Q8WUM4,O35889,Q9YH26,Q7PKQ5,Q5RCD8,P18091,Q64436,P30998,Q9TV52,Q8NF91,P13637,B6V8E6,Q02453,Q8WNW3,Q8VDN2,Q17GS9,Q9N0Z6,P09626,D2WKD8,P13607,P58312,P19156,Q0III9,Q92030,Q92036,P35224,P35223,P35222,Q08DA1,Q9QZQ1,Q5RCS6,O43707,P18907,P04074,Q7QHW5,Q9QZA2,Q2PFV7,L7UZ85,Q02257,P09572,P05094,P24798,Q6PIE5,P20111,P55196,Q5RDR3,P24797,P25489,P31007,P28774,P26233,…	Q08043,P27112,Q29I35,P12814,Q64541,Q64392,Q8WUM4,O35889,Q9YH26,Q7PKQ5,Q5RCD8,P18091,Q64436,P30998,Q9TV52,Q8NF91,P13637,B6V8E6,Q02453,Q8WNW3,Q8VDN2,Q17GS9,Q9N0Z6,P09626,D2WKD8,P13607,P58312,P19156,Q0III9,Q92030,Q92036,Q9UPQ0,P35224,P35223,P35222,Q08DA1,Q9QZQ1,Q5RCS6,O43707,P18907,P04074,Q7QHW5,P41743,Q9QZA2,Q2PFV7,L7UZ85,Q02257,P09572,P05094,P24798,Q6PIE5,P20111,P55196,Q5RDR3,P24797,P25489,P31007,…
GO:0120193	biological_process	tight junction organization	0.00923309	771	0.00749636	613	-0.300623	0.000107	1	0.0083144	0.00673837	-0.303212	9.28e-05	0.868	0.00502	QSVTDSMTR,TGAASSSSASSPAVQELR,KLMEEVETIK,MDELELVHQDVQEAM,FAIQDINIEESAAK,IMAIVDPNGTGYVTF,ALQFVYSK,KDSENEQTSDVEPS,TSFSEGSGGR,QGAIVAVTGDGVNDSPALKR,LGQVESWAQK,AWGNLEASEK,DGSSISSDSDSQK,MLDAEEMVNMAKPDER,LAVLQDVDSLL,MLPWLQDR,VQQDDMAVK,TSDLVFAR,MISDINR,LIIVEGCQR,VSWEQLLTAIAR,LTEEQAQK,YVELSEGSVK,NINEIENQILT,VDSINER,LGNRPAYLPT,VIMVTGDHPITAK,ALNNSSDAETTR,LNIPVEEVDPR,DSDGTLNDIQNK,NLVPQEAHVLR,DALEQDLK,NLVPQEAH…	QSVTDSMTR,EKQAGQAATER,VAEIPFNSTNKY,GILETNFNTLQTK,TGAASSSSASSPAVQELR,ILAGDKPYITVEELR,LEPLEFQQCLVSLGYDVK,DDPLGNLNLAFEVADK,MASDLLDWISK,GSSEEKENLFGR,ILVVGNSK,MDELELVHQDVQEAM,ANVVGEWIK,VATTPLVDDGSK,FAIQDINIEESAAK,SGGIPALVR,AVDWEQLEAR,LIFDNLK,GVGIISEGTETKEDVAAR,IMAIVDPNGTGYVTF,ALQFVYSK,DSDGTLNDIQNKLDALR,ILAGDKPYITVEE,GVGIISEGTETK,TSFSEGSGGR,DPLNDKLVNER,MLPWLQDRDSDGTLNDIQNK,NLVPQEAHV,ILAGDKPYITVEEL,QGAI…	lcl|c241349_g1_i1|m.28471,lcl|c213652_g3_i1|m.3162,lcl|c242839_g1_i1|m.30268,lcl|c233287_g2_i1|m.18368,lcl|c234934_g3_i3|m.20432,lcl|c222667_g10_i4|m.8510,lcl|c217788_g4_i2|m.5364,lcl|c222950_g5_i5|m.8734,lcl|c220863_g2_i3|m.7207,lcl|c222950_g5_i5|m.8735,lcl|c243788_g1_i5|m.31318,lcl|c222950_g5_i7|m.8739	lcl|c224520_g2_i6|m.9890,lcl|c222667_g10_i4|m.8510,lcl|c222950_g5_i5|m.8734,lcl|c234780_g1_i1|m.20238,lcl|c222950_g5_i5|m.8735,lcl|c224520_g2_i1|m.9889,lcl|c243788_g1_i5|m.31318,lcl|c222950_g5_i7|m.8739,lcl|c241349_g1_i1|m.28471,lcl|c213652_g3_i1|m.3162,lcl|c242839_g1_i1|m.30268,lcl|c233287_g2_i1|m.18368,lcl|c234934_g3_i3|m.20432,lcl|c217788_g4_i2|m.5364,lcl|c220863_g2_i3|m.7207	Q08043,P27112,P12814,Q29I35,Q64541,Q64392,Q8WUM4,O35889,Q9YH26,Q7PKQ5,Q5RCD8,P18091,Q64436,P30998,Q9TV52,Q8NF91,P13637,B6V8E6,Q02453,Q8WNW3,Q8VDN2,Q17GS9,Q9N0Z6,P09626,D2WKD8,P13607,P58312,P19156,Q0III9,Q92030,Q92036,P35224,P35223,P35222,Q08DA1,Q9QZQ1,Q5RCS6,O43707,P18907,P04074,Q7QHW5,Q9QZA2,Q2PFV7,L7UZ85,Q02257,P09572,P05094,P24798,Q6PIE5,P20111,P55196,Q5RDR3,P24797,P25489,P31007,P28774,P26233,…	Q08043,P27112,Q29I35,P12814,Q64541,Q64392,Q8WUM4,O35889,Q9YH26,Q7PKQ5,Q5RCD8,P18091,Q64436,P30998,Q9TV52,Q8NF91,P13637,B6V8E6,Q02453,Q8WNW3,Q8VDN2,Q17GS9,Q9N0Z6,P09626,D2WKD8,P13607,P58312,P19156,Q0III9,Q92030,Q92036,Q9UPQ0,P35224,P35223,P35222,Q08DA1,Q9QZQ1,Q5RCS6,O43707,P18907,P04074,Q7QHW5,P41743,Q9QZA2,Q2PFV7,L7UZ85,Q02257,P09572,P05094,P24798,Q6PIE5,P20111,P55196,Q5RDR3,P24797,P25489,P31007,…
GO:1900372	biological_process	negative regulation of purine nucleotide biosynthetic process	0.0056644	473	0.00431683	353	-0.391951	0.000103	0.959	0.00510495	0.00388499	-0.393988	9.29e-05	0.868	0.00502	GILETNFNTLQTK,MISDINR,ILAGDKPYITVEELR,SIALTMEGPLEDQLK,LEPLEFQQCLVSLGYDVK,LAVLQDVDSLLLEFAK,VSWEQLLTAIAR,MASDLLDWISK,GLLDAAWER,MDELELVHQDVQEAM,ANVVGEWIK,FAIQDINIEESAAK,DGLLLWCQR,LDHLAEK,IMAIVDPNGTGYVTF,ALQFVYSK,LAVLQDVDSLLL,DSDGTLNDIQNKLDALR,ILAGDKPYITVEE,NINEIENQILT,VDSINER,LGNRPAYLPT,ILAGDKPYITVEEL,DDPLGNLNLAF,DSDGTLNDIQNK,AAPYNNWLESAR,MMEEYEK,NINEIENQILTR,MAPYEGPDAVPGALDY,AAQELER,GLTEEQMK,DDLENA…	GILETNFNTLQTK,MISDINR,ILAGDKPYITVEELR,SIALTMEGPLEDQLK,LEPLEFQQCLVSLGYDVK,VSWEQLLTAIAR,DSDGTLNDIQNKLDAL,DDPLGNLNLAFEVADK,MASDLLDWISK,GLLDAAWER,LAVLQDVDSLLLE,MDELELVHQDVQEAM,ANVVGEWIK,FAIQDINIEESAAK,LDHLAEK,IMAIVDPNGTGYVTF,ALQFVYSK,DFEDWLLK,LAVLQDVDSLLL,DSDGTLNDIQNKLDALR,ILAGDKPYITVEE,NINEIENQILT,VDSINER,LGNRPAYLPT,MLPWLQDRDSDGTLNDIQNK,ILAGDKPYITVEEL,DSDGTLNDIQNK,AAPYNNWLESAR,NINEIENQILTR,AAQELER,G…	lcl|c234934_g3_i3|m.20432,lcl|c243788_g1_i5|m.31318	lcl|c234934_g3_i3|m.20432,lcl|c244084_g2_i1|m.31725,lcl|c243788_g1_i5|m.31318	Q7PKQ5,A5D7D1,P18091,Q08043,Q9JI91,Q7TPR4,Q90734,Q9Z1P2,Q8NF91,P35609,Q2PFV7,P12814,Q9QXQ0,Q0III9,Q5RCS6,L7UZ85,O43707,P57780,P05094,P20111,Q3ZC55,Q3B7N2,O88990	Q7PKQ5,A5D7D1,P18091,Q08043,Q9JI91,Q7TPR4,Q90734,Q9Z1P2,Q8NF91,P49288,P35609,Q2PFV7,P12814,Q9QXQ0,Q0III9,Q5RCS6,L7UZ85,O43707,P57780,P05094,P20111,Q3ZC55,Q3B7N2,O88990
GO:0030809	biological_process	negative regulation of nucleotide biosynthetic process	0.0056644	473	0.00431683	353	-0.391951	0.000103	0.959	0.00510495	0.00388499	-0.393988	9.29e-05	0.868	0.00502	GILETNFNTLQTK,MISDINR,ILAGDKPYITVEELR,SIALTMEGPLEDQLK,LEPLEFQQCLVSLGYDVK,LAVLQDVDSLLLEFAK,VSWEQLLTAIAR,MASDLLDWISK,GLLDAAWER,MDELELVHQDVQEAM,ANVVGEWIK,FAIQDINIEESAAK,DGLLLWCQR,LDHLAEK,IMAIVDPNGTGYVTF,ALQFVYSK,LAVLQDVDSLLL,DSDGTLNDIQNKLDALR,ILAGDKPYITVEE,NINEIENQILT,VDSINER,LGNRPAYLPT,ILAGDKPYITVEEL,DDPLGNLNLAF,DSDGTLNDIQNK,AAPYNNWLESAR,MMEEYEK,NINEIENQILTR,MAPYEGPDAVPGALDY,AAQELER,GLTEEQMK,DDLENA…	GILETNFNTLQTK,MISDINR,ILAGDKPYITVEELR,SIALTMEGPLEDQLK,LEPLEFQQCLVSLGYDVK,VSWEQLLTAIAR,DSDGTLNDIQNKLDAL,DDPLGNLNLAFEVADK,MASDLLDWISK,GLLDAAWER,LAVLQDVDSLLLE,MDELELVHQDVQEAM,ANVVGEWIK,FAIQDINIEESAAK,LDHLAEK,IMAIVDPNGTGYVTF,ALQFVYSK,DFEDWLLK,LAVLQDVDSLLL,DSDGTLNDIQNKLDALR,ILAGDKPYITVEE,NINEIENQILT,VDSINER,LGNRPAYLPT,MLPWLQDRDSDGTLNDIQNK,ILAGDKPYITVEEL,DSDGTLNDIQNK,AAPYNNWLESAR,NINEIENQILTR,AAQELER,G…	lcl|c234934_g3_i3|m.20432,lcl|c243788_g1_i5|m.31318	lcl|c234934_g3_i3|m.20432,lcl|c244084_g2_i1|m.31725,lcl|c243788_g1_i5|m.31318	Q7PKQ5,A5D7D1,P18091,Q08043,Q9JI91,Q7TPR4,Q90734,Q9Z1P2,Q8NF91,P35609,Q2PFV7,P12814,Q9QXQ0,Q0III9,Q5RCS6,L7UZ85,O43707,P57780,P05094,P20111,Q3ZC55,Q3B7N2,O88990	Q7PKQ5,A5D7D1,P18091,Q08043,Q9JI91,Q7TPR4,Q90734,Q9Z1P2,Q8NF91,P49288,P35609,Q2PFV7,P12814,Q9QXQ0,Q0III9,Q5RCS6,L7UZ85,O43707,P57780,P05094,P20111,Q3ZC55,Q3B7N2,O88990
GO:0030813	biological_process	positive regulation of nucleotide catabolic process	0.00568835	475	0.00434129	355	-0.389888	0.000107	1	0.00512649	0.00390694	-0.391935	9.71e-05	0.907	0.00518	GILETNFNTLQTK,MISDINR,ILAGDKPYITVEELR,SIALTMEGPLEDQLK,LEPLEFQQCLVSLGYDVK,LAVLQDVDSLLLEFAK,VSWEQLLTAIAR,MASDLLDWISK,GLLDAAWER,MDELELVHQDVQEAM,ANVVGEWIK,FAIQDINIEESAAK,SDASLVSPVAPGSGAPTPQR,DGLLLWCQR,LDHLAEK,IMAIVDPNGTGYVTF,ALQFVYSK,LAVLQDVDSLLL,DSDGTLNDIQNKLDALR,ILAGDKPYITVEE,NINEIENQILT,VDSINER,LGNRPAYLPT,ILAGDKPYITVEEL,DDPLGNLNLAF,DSDGTLNDIQNK,AAPYNNWLESAR,MMEEYEK,NINEIENQILTR,MAPYEGPDAVPGALDY,AA…	GILETNFNTLQTK,MISDINR,ILAGDKPYITVEELR,SIALTMEGPLEDQLK,LEPLEFQQCLVSLGYDVK,VSWEQLLTAIAR,DSDGTLNDIQNKLDAL,DDPLGNLNLAFEVADK,MASDLLDWISK,GLLDAAWER,LAVLQDVDSLLLE,MDELELVHQDVQEAM,ANVVGEWIK,FAIQDINIEESAAK,SDASLVSPVAPGSGAPTPQR,LDHLAEK,IMAIVDPNGTGYVTF,ALQFVYSK,DFEDWLLK,LAVLQDVDSLLL,DSDGTLNDIQNKLDALR,ILAGDKPYITVEE,NINEIENQILT,VDSINER,LGNRPAYLPT,DIKPENL,MLPWLQDRDSDGTLNDIQNK,ILAGDKPYITVEEL,DIKPENLL,DSDGTLNDIQ…	lcl|c234934_g3_i3|m.20432,lcl|c239908_g1_i5|m.26518,lcl|c243788_g1_i5|m.31318	lcl|c234064_g1_i4|m.19396,lcl|c210586_g1_i2|m.2213,lcl|c234064_g1_i2|m.19394,lcl|c210586_g1_i1|m.2212,lcl|c239574_g1_i2|m.26000,lcl|c210586_g1_i4|m.2214,lcl|c242662_g1_i1|m.30100,lcl|c239908_g1_i5|m.26518,lcl|c229547_g1_i1|m.14385,lcl|c221676_g4_i8|m.7788,lcl|c226454_g2_i17|m.11487,lcl|c234064_g1_i1|m.19391,lcl|c241464_g1_i3|m.28607,lcl|c241464_g1_i1|m.28602,lcl|c239574_g1_i8|m.26002,lcl|c225854_…	Q7PKQ5,A5D7D1,P18091,Q08043,Q9JI91,Q7TPR4,Q90734,P27540,Q9Z1P2,Q8NF91,P35609,Q2PFV7,P12814,Q9QXQ0,Q0III9,Q5RCS6,L7UZ85,O43707,P57780,P05094,P20111,Q3ZC55,Q3B7N2,O88990	Q08043,P11801,Q6GPN6,Q15418,Q2PFV7,Q96BR1,Q13557,P12814,O75582,Q63531,Q09137,Q5RCC4,L7UZ85,Q6DE87,P05094,Q21734,Q9DB30,P20111,A5GFW1,P49138,Q923T9,Q15349,Q7PKQ5,P18091,P28652,Q8NF91,P35609,Q3MHJ9,D2I3C6,P11730,Q9JLM8,P18652,Q6PFQ0,Q9UQM7,P18653,Q2HJF7,P18654,P13234,Q5ZKI0,P57780,Q9DG02,Q5R7A7,Q5MPA9,O61661,Q3ZC55,Q16566,P08413,Q3B7N2,P0C605,A8WXF6,Q9WUT3,A5D7D1,Q7TPR4,Q90734,Q8IW41,Q6PHZ2,Q9Z1P2,…
GO:0050848	biological_process	regulation of calcium-mediated signaling	0.0100714	841	0.00826679	676	-0.284862	0.00012	1	0.00906829	0.00742976	-0.287515	0.000103	0.964	0.00544	DQVIGAQDNSAGQK,GILETNFNTLQTK,ILAGDKPYITVEELR,LEPLEFQQCLVSLGYDVK,LAVLQDVDSLLLEFAK,MASDLLDWISK,LSPQALNVIVK,EQQIIQLTQK,EVWAMVK,QEGGQEALNK,MDELELVHQDVQEAM,TTFMQYDSDR,ANVVGEWIK,LTAFEPEAR,VDTTTQENNDER,FAIQDINIEESAAK,IMAIVDPNGTGYVTF,ALQFVYSK,AGAYDYPSPEWDTVTDEAK,IGSSGAPVTDQSEETR,EGYGEFPKPGETVV,GVGGVIPPNATLL,DSDGTLNDIQNKLDALR,AVVEYPFHCCLITNMK,ILAGDKPYITVEE,GVGGVIPPNATL,LGTGQVIR,ILAGDKPYITVEEL,GVGGVIPPNATL…	DQVIGAQDNSAGQK,GILETNFNTLQTK,ILAGDKPYITVEELR,LEPLEFQQCLVSLGYDVK,MQMQIQELLSK,IMITMLDRDFSGK,DDPLGNLNLAFEVADK,MASDLLDWISK,LSPQALNVIVK,EQQIIQLTQK,EVWAMVK,QEGGQEALNK,MDELELVHQDVQEAM,TTFMQYDSDR,ANVVGEWIK,LTAFEPEAR,VDTTTQENNDER,EIIKEGYGEFPKPGETVVV,FAIQDINIEESAAK,LNFDDFLQIVCR,IMAIVDPNGTGYVTF,ALQFVYSK,IGSSGAPVTDQSEETR,GVGGVIPPNATLL,DSDGTLNDIQNKLDALR,DAENVYNQVINLDPR,ILAGDKPYITVEE,GVGGVIPPNATL,LTQRIGSSGAPVT…	lcl|c222929_g2_i3|m.8717,lcl|c240630_g1_i1|m.27515,lcl|c223629_g2_i2|m.9260,lcl|c217326_g3_i1|m.5105,lcl|c223629_g2_i3|m.9261,lcl|c241047_g4_i1|m.28118,lcl|c243788_g1_i5|m.31318,lcl|c228653_g2_i5|m.13498,lcl|c236283_g1_i1|m.21952,lcl|c235481_g2_i1|m.20956,lcl|c239962_g2_i3|m.26573,lcl|c223629_g2_i1|m.9258,lcl|c230411_g4_i1|m.15261,lcl|c234934_g3_i3|m.20432,lcl|c218375_g1_i1|m.5756,lcl|c228653_g2_…	lcl|c234064_g1_i4|m.19396,lcl|c234064_g1_i2|m.19394,lcl|c223629_g2_i2|m.9260,lcl|c240630_g1_i1|m.27515,lcl|c223629_g2_i3|m.9261,lcl|c242662_g1_i1|m.30100,lcl|c221676_g4_i8|m.7788,lcl|c241047_g4_i1|m.28118,lcl|c235481_g2_i1|m.20956,lcl|c225854_g1_i4|m.10994,lcl|c221676_g4_i4|m.7786,lcl|c224773_g5_i3|m.10121,lcl|c217583_g2_i1|m.5267,lcl|c227927_g4_i1|m.12894,lcl|c222929_g2_i3|m.8717,lcl|c237286_g1_…	Q08043,Q2PFV7,Q13557,P12814,Q5RCC4,L7UZ85,P61023,P61022,P05094,P20111,Q923T9,Q7PKQ5,P18091,P28652,Q8NF91,P35609,Q3MHJ9,P11730,Q9UQM7,P78417,Q2HJF7,Q5ZKI0,O88801,P57780,Q9DG02,Q3ZC55,P08413,Q3B7N2,A5D7D1,A8WXF6,Q7TPR4,Q90734,Q9NSB8,Q6PHZ2,Q9Z1P2,P30626,O42123,Q0III9,Q95266,P15791,O77708,O88990,Q6DEH3,Q9JI91,Q8BSY0,Q5R4U9,Q8IWX8,Q9QWW1,P11798,P11275,P30730,Q9QXQ0,Q00168,Q5RCS6,O43707,Q6P069	Q08043,Q15418,P12814,Q09137,Q5RCC4,P61023,P61022,Q9DB30,A5GFW1,P49138,Q923T9,Q7PKQ5,P18091,Q91757,Q8NF91,Q3MHJ9,P11730,Q9JLM8,P18652,P78417,P18653,P18654,P13234,O61661,P0C605,Q9WUT3,Q9NSB8,P30626,Q8BRK8,Q66JF3,Q0III9,Q95266,O77708,Q0V7M1,Q5R4U9,Q8IWX8,Q9WV60,Q5YJC2,P51812,P11798,P11275,P54646,Q5RCS6,O43707,Q6P069,P11801,Q6GPN6,Q2PFV7,Q96BR1,Q13557,O75582,Q63531,L7UZ85,Q6DE87,P05094,Q21734,P20111,…
GO:0030501	biological_process	positive regulation of bone mineralization	0.00615539	514	0.00475707	389	-0.371777	0.000115	1	0.00554652	0.00428007	-0.373949	0.000104	0.969	0.00544	GILETNFNTLQTK,ILAGDKPYITVEELR,LEPLEFQQCLVSLGYDVK,LAVLQDVDSLLLEFAK,MASDLLDWISK,MDELELVHQDVQEAM,ANVVGEWIK,FAIQDINIEESAAK,QTTDQGSYTPLDNASVGLK,TCADNDECANPEINK,IMAIVDPNGTGYVTF,ALQFVYSK,DSDGTLNDIQNKLDALR,ILAGDKPYITVEE,FNTLTGNLLNGEEVNR,IAVIPFSTDAK,ILAGDKPYITVEEL,SGTPGSIQR,AAQELER,AWGNLEASEK,CLTGYQGSGR,MLDAEEMVNMAKPDER,LAVLQDVDSLL,VLTINKDNEK,LGNRPAYLPTEGK,MLPWLQDR,IADFGLAR,VVTGQLQPNR,MISDINR,SIALTMEGPLED…	GILETNFNTLQTK,ILAGDKPYITVEELR,LEPLEFQQCLVSLGYDVK,DDPLGNLNLAFEVADK,MASDLLDWISK,MDELELVHQDVQEAM,ANVVGEWIK,FAIQDINIEESAAK,QTTDQGSYTPLDNASVGLK,TCADNDECANPEINK,IMAIVDPNGTGYVTF,ALQFVYSK,DSDGTLNDIQNKLDALR,ILAGDKPYITVEE,FNTLTGNLLNGEEVNR,IAVIPFSTDAK,MLPWLQDRDSDGTLNDIQNK,ILAGDKPYITVEEL,AAQELER,AWGNLEASEK,CLTGYQGSGR,MLDAEEMVNMAKPDER,LAVLQDVDSLL,CQYICDEWAK,VLTINKDNEK,LGNRPAYLPTEGK,MLPWLQDR,IADFGLAR,VVTGQLQPN…	lcl|c226782_g6_i6|m.11785,lcl|c240483_g1_i8|m.27301,lcl|c235052_g1_i3|m.20523,lcl|c221061_g4_i1|m.7355,lcl|c235052_g1_i4|m.20524,lcl|c226176_g1_i2|m.11271,lcl|c221061_g4_i2|m.7358,lcl|c235052_g1_i6|m.20525,lcl|c232719_g2_i1|m.17712,lcl|c226782_g6_i4|m.11783,lcl|c213237_g2_i2|m.2995,lcl|c226782_g6_i5|m.11784,lcl|c221431_g3_i2|m.7619,lcl|c233141_g1_i1|m.18196,lcl|c213203_g1_i1|m.2991,lcl|c217198_g5…	lcl|c226782_g6_i6|m.11785,lcl|c240483_g1_i8|m.27301,lcl|c235052_g1_i3|m.20523,lcl|c221061_g4_i1|m.7355,lcl|c235052_g1_i4|m.20524,lcl|c226176_g1_i2|m.11271,lcl|c221061_g4_i2|m.7358,lcl|c235052_g1_i6|m.20525,lcl|c232719_g2_i1|m.17712,lcl|c226782_g6_i4|m.11783,lcl|c213237_g2_i2|m.2995,lcl|c226782_g6_i5|m.11784,lcl|c221431_g3_i2|m.7619,lcl|c233141_g1_i1|m.18196,lcl|c213203_g1_i1|m.2991,lcl|c234378_g4…	Q61851,Q61555,A5D7D1,Q08043,Q7TPR4,Q90734,O64771,Q9Z1P2,Q2PFV7,P18460,P12814,Q3UMM4,Q0III9,L7UZ85,Q00535,Q5ZKN1,Q00534,P05094,P43450,Q8N165,Q6NU47,O22042,P20111,P20794,O88990,Q7PKQ5,P18091,Q9JI91,O00339,Q7T6X2,Q8NF91,P35609,A8WIP6,Q9QXQ0,Q5RCS6,O43707,P57780,P22607,A4UTP7,Q6FN53,P08630,P27636,Q3ZC55,Q6P3Q4,Q3B7N2	Q61851,Q61555,A5D7D1,Q08043,Q7TPR4,Q90734,O64771,Q9Z1P2,Q2PFV7,P18460,P12814,Q3UMM4,Q0III9,L7UZ85,Q00535,Q5ZKN1,Q00534,P05094,P43450,Q8N165,Q6NU47,O22042,P20111,P20794,O88990,Q7PKQ5,P18091,Q9JI91,O00339,Q7T6X2,Q8NF91,P35609,A8WIP6,Q9QXQ0,Q5RCS6,O43707,P57780,P22607,A4UTP7,Q6FN53,P08630,P27636,Q3ZC55,Q6P3Q4,Q3B7N2
GO:0035166	biological_process	post-embryonic hemopoiesis	0.00012	10	6.11e-05	5	-0.969779	0.211	1	0.000118	6.58e-05	-0.847319	0.24	1	0.804	VVSQNPSER,YQESTNR,IQEAAIVDNLK,NFVGDYIGYDDNPALR,NMLIDQENQCVIISGESGAGK	VVSQNPSER,SPPAPGKPK,NFVGDYIGYDDNPALR,DLIEIMQTSENPFIR,NMLIDQENQCVIISGESGAGK	lcl|c236793_g3_i7|m.22527,lcl|c236793_g3_i6|m.22526,lcl|c236793_g3_i9|m.22532,lcl|c236793_g3_i7|m.22528	lcl|c236793_g3_i7|m.22527,lcl|c236793_g3_i6|m.22526,lcl|c236793_g3_i9|m.22532,lcl|c236793_g3_i7|m.22528	Q2US45,Q05096,O43795,A4RE77,A1C4A5,Q59MQ0,A5E4A8,Q04439,P34092,A3LYL7,A8N2Y6,Q2HDI2,Q6CVE9,Q9Y7Z8,P10569,Q6FN18,Q758Q9,A8PWF6,O00160,A5DKH0,Q7Z8J6,Q92002,A7TDZ8,E9Q634,P22467,P46735,Q0CEX5,P34109,Q12965,A1DBH2,P36006,P0CP01,Q6BUQ2,A2R5J1,P0CP00,P70248,Q63356,P42522,A6SED8,Q4WC55,P19706,A6ZMG6,B0Y9Q4,Q1DLP2,B0CRJ3,Q6FMJ3,A6ZZJ1,A7EK16,Q03479,Q6C7C0,Q00647,Q7SDM3	Q2US45,Q05096,O43795,A4RE77,A1C4A5,Q59MQ0,A5E4A8,Q04439,P34092,A3LYL7,A8N2Y6,Q2HDI2,Q6CVE9,Q9Y7Z8,P10569,Q6FN18,Q758Q9,A8PWF6,O00160,A5DKH0,Q7Z8J6,Q92002,A7TDZ8,E9Q634,P22467,P46735,Q0CEX5,P34109,Q12965,A1DBH2,P36006,P0CP01,Q6BUQ2,A2R5J1,P0CP00,P70248,Q63356,P42522,A6SED8,Q4WC55,P19706,A6ZMG6,B0Y9Q4,Q1DLP2,B0CRJ3,Q6FMJ3,A6ZZJ1,A7EK16,Q03479,Q6C7C0,Q00647,Q7SDM3
GO:0060122	biological_process	inner ear receptor cell stereocilium organization	0.00287411	240	0.00302056	247	0.0716974	0.583	1	0.00259556	0.00272169	0.0684567	0.599	1	0.908	TSANTGLR,YGENPFGCYK,EEEKPSEEAEVANDATTPEEVK,LMIEEVPR,GDPGLQAMPK,IKGNPEEVTMLVI,VIEVNGANVEGETHNDVVKR,FACGVIGITK,IAYCLDCCK,IYIEEIPPPQA,LMIEEVPPPQK,NIDEDKDNGMIK,LIVAGDPGVGK,SGQTISAVDDNSEAQK,QLNEVLDKEDSSSPPEPTPE,VGTGSSAPKGSWISTIIPFGH,TGFGSVFR,IYNCDNCCSR,VGTGSSAPK,EEEKPSEEAEVAN,TDSNIHK,VIEVNGANVEGETHNDVVK,EDDLGKGGNEESTK,VIDINDNAPTIIPR,ESTEPAAAEDEK,KAADAYTGWNSVTR,VGLSLDNCPGYPTNK,AADAYTGWNSVTR,IIIQEVPAPQV…	TSANTGLR,EEEKPSEEAEVANDATTPEEVK,LMIEEVPR,IAYCLDCCKR,TGAYPNAVKEPLR,FACGVIGITK,IAYCLDCCK,IYIEEIPPPQA,LMIEEVPPPQK,NIDEDKDNGMIK,SGQTISAVDDNSEAQK,VDITDRLVTLVGNNSVVGR,ECTFNK,QLNEVLDKEDSSSPPEPTPEFQPTTV,HYGDLGNIIADDTGVAK,TGFGSVFR,IYNCDNCCSR,EEEKPSEEAEVAN,VIEVNGANVEGETHNDVVK,CADEAMR,EDDLGKGGNEESTK,ESTEPAAAEDEK,KAADAYTGWNSVTR,VGLSLDNCPGYPTNK,AADAYTGWNSVTR,IIIQEVPAPQV,TTQIAGYCEGIGK,VVASDQGQNR,VAINVGDCVGR,LL…	lcl|c236655_g1_i2|m.22362,lcl|c213072_g1_i1|m.2941,lcl|c226723_g5_i2|m.11731,lcl|c239763_g2_i3|m.26299,lcl|c241674_g2_i2|m.28842,lcl|c240175_g3_i1|m.26871,lcl|c236424_g4_i3|m.22101,lcl|c239763_g2_i4|m.26300,lcl|c227080_g2_i3|m.12113,lcl|c242601_g4_i2|m.30017,lcl|c164490_g1_i1|m.440,lcl|c227080_g2_i4|m.12114,lcl|c222543_g3_i2|m.8418,lcl|c218224_g6_i3|m.5646,lcl|c218224_g6_i4|m.5647,lcl|c241674_g2_…	lcl|c236655_g1_i2|m.22362,lcl|c213072_g1_i1|m.2941,lcl|c226723_g5_i2|m.11731,lcl|c239763_g2_i3|m.26299,lcl|c241674_g2_i2|m.28842,lcl|c240175_g3_i1|m.26871,lcl|c236424_g4_i3|m.22101,lcl|c239763_g2_i4|m.26300,lcl|c227080_g2_i3|m.12113,lcl|c242601_g4_i2|m.30017,lcl|c164490_g1_i1|m.440,lcl|c227080_g2_i4|m.12114,lcl|c222543_g3_i2|m.8418,lcl|c244324_g2_i1|m.32048,lcl|c241674_g2_i1|m.28841,lcl|c242601_g…	Q8R508,Q8TDW7,Q8BNA6,Q19319,Q24292,B8V7Q1,Q9JJ19,E9PVD3,Q96CG8,Q0VCN3,P58365,Q9NYQ8,Q99PF4,Q9D1D6,O88277,Q8CG08,Q15643,Q9BW83,Q14517,Q9VW71,Q2PZL6,Q96JQ0,Q52RN5,Q9H251,Q6V0I7,P33450,Q8HXQ3,D4ACX8,Q5F226	Q8R508,Q8TDW7,Q8BNA6,Q24292,B8V7Q1,Q9JJ19,E9PVD3,Q6V1P9,Q96CG8,P58365,Q9NYQ8,Q99PF4,Q9D1D6,O88277,Q8CG08,Q15643,Q14517,Q9VW71,Q2PZL6,Q96JQ0,Q52RN5,Q9H251,Q6V0I7,P33450,Q8HXQ3,D4ACX8,Q5F226
GO:0036498	biological_process	IRE1-mediated unfolded protein response	0.00538896	450	0.00646913	529	0.263563	0.00422	1	0.00485724	0.00581651	0.260015	0.00473	1	0.0903	DTLDSEVGQLLSTEEER,VDKDIEQSEEVVV,DGDVLLVR,SASSPSNLVGSNQNPGSSGPK,ELTYMHSEGILAGELK,EPLDTAQR,INPDGSVVDQGSTNLGVNKA,ISDPGEEGGKPNMFR,GDDQENAEQNSTADAK,VNKADDGSETVK,VDKDIEQSEEVVVK,YVKNEGEK,GIFTNEEEKESIVK,VELDSDEPVII,EVTTPSTVSSTR,MIDKDNNNELSIGEVK,DLQQKDDAK,GALIVGVTNTVGSSISR,SGGGGVDSGQIK,SINTDEAAALGAVYQAAELGK,ISDPGEEGGKPNMF,DDASDESYFR,QLLEELTQLPVVV,VLRDELEGLVQNY,DADQSSFMDSK,AIEVAPWDPDLR,GNKPLIEGK,SVEDGDEDGP…	DTLDSEVGQLLSTEEER,ELVVPSQYGYGEFPVGDK,DGDVLLVR,AGQYVLSGVQK,SASSPSNLVGSNQNPGSSGPK,QAELKPQENPVLVVK,VLRDELEGLVQN,EPLDTAQR,INPDGSVVDQGSTNLGVNKA,ISDPGEEGGKPNMFR,GDDQENAEQNSTADAK,VNKADDGSETVK,VDKDIEQSEEVVVK,GIFTNEEEKESIVK,EVTTPSTVSSTR,MIDKDNNNELSIGEVK,DLQQKDDAK,SGGGGVDSGQIK,SINTDEAAALGAVYQAAELGK,ISDPGEEGGKPNMF,DDASDESYFR,QLLEELTQLPVVV,VLRDELEGLVQNY,DADQSSFMDSK,DGDLLAMH,AIEVAPWDPDLR,GNKPLIEGK,GINGDETKEEK…	lcl|c223357_g4_i3|m.9060,lcl|c231634_g1_i2|m.16472,lcl|c231634_g1_i4|m.16475,lcl|c231634_g1_i4|m.16476,lcl|c231469_g3_i4|m.16290,lcl|c231469_g3_i3|m.16289,lcl|c234914_g2_i2|m.20413,lcl|c232133_g1_i5|m.17039,lcl|c231634_g1_i5|m.16478,lcl|c231634_g1_i5|m.16479,lcl|c224029_g4_i2|m.9565,lcl|c217573_g1_i1|m.5252,lcl|c222526_g1_i2|m.8408,lcl|c221883_g2_i5|m.7954,lcl|c224029_g4_i1|m.9563,lcl|c231469_g3_…	lcl|c223357_g4_i3|m.9060,lcl|c231634_g1_i2|m.16472,lcl|c231634_g1_i4|m.16475,lcl|c231634_g1_i4|m.16476,lcl|c231469_g3_i4|m.16290,lcl|c231469_g3_i3|m.16289,lcl|c234914_g2_i2|m.20413,lcl|c232133_g1_i5|m.17039,lcl|c231634_g1_i5|m.16478,lcl|c231634_g1_i5|m.16479,lcl|c224029_g4_i2|m.9565,lcl|c217573_g1_i1|m.5252,lcl|c222526_g1_i2|m.8408,lcl|c221883_g2_i5|m.7954,lcl|c217096_g5_i1|m.4965,lcl|c224029_g4_…	P82808,Q16943,Q62847,O18178,Q63617,Q13217,Q61151,P53704,A4FV68,Q80W83,A2VDZ9,Q4KMC4,Q28653,P35611,Q5ZLK7,Q28647,Q9JKR6,Q7ZUW2,Q8SRI2,O94808,P47856,Q9NWM8,Q0VA61,Q60432,Q63028,Q5R941,P18031,Q16537,Q6PD28,Q6PD03,Q14738,P14742,Q06210,Q9Y4L1,Q09740,Q566I3,Q15172,Q9Z2Z9,Q08DQ2,Q15173,Q8N6T3	P29353,P82808,Q16943,Q62847,O18178,Q63617,Q13217,Q61151,P53704,A4FV68,Q80W83,A2VDZ9,Q4KMC4,Q28653,P35611,Q5ZLK7,Q28647,Q0IIE2,Q9JKR6,Q7ZUW2,Q5M824,Q8SRI2,O94808,P47856,Q9NWM8,P98083,Q5R7W7,Q0VA61,Q60432,Q63028,Q5R941,P18031,Q16537,Q6PD28,Q6PD03,Q14738,P14742,Q06210,Q9Y4L1,Q09740,Q566I3,Q15172,Q9Z2Z9,Q08DQ2,Q15173,Q8N6T3
GO:0019915	biological_process	lipid storage	0.00718528	600	0.00681154	557	-0.0770644	0.362	1	0.00647274	0.00612379	-0.0799502	0.344	1	0.862	MSDIYVK,VVPEFDTPGHTF,QGQYVPMEIAEQVAVI,TFNLFAQK,EIESFVQR,LPGGSWGPSTVPWTDVR,QGQYVPMEIAEQVAV,ASSLPDVDTFGK,VNGQEPPSPR,SVTDLTDAENR,VTVAEQQR,LQEEEENR,LQEEEENRTEQLSK,VLSPPSAYLTSYTVWGALR,NKEAVTEEK,GFNDFIATFPLR,QATGPLSNEDVIAAQPFMR,VDSATPGVNELDLK,LTIMEEASK,NLPDEHDDLNK,HYVNVPIILK,EVAAFAQFGSDLDAATQSLLNR,KEGVISEDTDAK,IQLWVDIFPK,EGVISEDTDAK,VTVVVLGPGDEAPSTSK,DIEDDIESNLLMPV,LVGLLAGENENDK,IEDLAVEPQR,SDPFVIIK,TEG…	EGVISEDTDAKLK,MSDIYVK,VVPEFDTPGHTF,QGQYVPMEIAEQVAVI,FIFTITGQSSDVLEDAIER,EIESFVQR,LPGGSWGPSTVPWTDVR,QGQYVPMEIAEQVAV,ASSLPDVDTFGK,NLPSTNPIECTVR,VNGQEPPSPR,SVTDLTDAENR,VTVAEQQR,LQEEEENR,LQEEEENRTEQLSK,QGQYVPMEIAEQV,VLSPPSAYLTSYTVWGALR,GFNDFIATFPLR,QATGPLSNEDVIAAQPFMR,VDSATPGVNELDLK,NLPDEHDDLNK,HYVNVPIILK,EVAAFAQFGSDLDAATQSLLNR,KEGVISEDTDAK,EGVISEDTDAK,VTVVVLGPGDEAPSTSK,DIEDDIESNLLMPV,QSEKPLEILEK,IED…	lcl|c240720_g1_i1|m.27657,lcl|c215957_g2_i7|m.4321,lcl|c214670_g8_i2|m.3578,lcl|c227564_g2_i3|m.12583,lcl|c81884_g1_i1|m.32679,lcl|c206351_g3_i5|m.1528,lcl|c215957_g2_i1|m.4319,lcl|c240720_g1_i3|m.27662,lcl|c240720_g1_i1|m.27658,lcl|c215957_g2_i7|m.4322,lcl|c240720_g1_i1|m.27659,lcl|c215957_g2_i1|m.4320,lcl|c227564_g2_i6|m.12586,lcl|c206351_g3_i3|m.1527,lcl|c231281_g6_i3|m.16097,lcl|c236822_g3_i1…	lcl|c240720_g1_i1|m.27657,lcl|c215957_g2_i7|m.4321,lcl|c214670_g8_i2|m.3578,lcl|c227564_g2_i3|m.12583,lcl|c81884_g1_i1|m.32679,lcl|c206351_g3_i5|m.1528,lcl|c215957_g2_i1|m.4319,lcl|c240720_g1_i3|m.27662,lcl|c240720_g1_i1|m.27658,lcl|c215957_g2_i7|m.4322,lcl|c240720_g1_i1|m.27659,lcl|c215957_g2_i1|m.4320,lcl|c227564_g2_i6|m.12586,lcl|c206351_g3_i3|m.1527,lcl|c231281_g6_i3|m.16097,lcl|c236822_g3_i1…	Q2WGJ9,Q0V8R6,Q69ZN7,A0AVI2,O75923,P51692,P20060,B3DLH6,Q9XXK1,Q62771,P0DM40,P35381,Q29548,P42232,Q9ESD7,A6QQP7,Q9NZM1,Q5SPC5,Q9ERC5,P07686,Q9ESF1,Q9HC10	Q2WGJ9,Q0V8R6,Q69ZN7,A0AVI2,O75923,P51692,P20060,B3DLH6,Q9XXK1,Q62771,P0DM40,P35381,Q29548,P42232,Q9ESD7,A6QQP7,Q9NZM1,Q5SPC5,Q9ERC5,P07686,Q9ESF1,Q9HC10
GO:0060123	biological_process	regulation of growth hormone secretion	0.000695	58	0.00077	63	0.14952	0.569	1	0.000635	0.000702	0.144507	0.579	1	0.895	SGTVVQLR,DGEVTHIK,LVDEPPPPLAPR,EFELTSDTNPIPR,YLQEFEYSDYTLR,IIVMTTK,EAETMILDK,EQGLDCEIDISK,IQNVGDFYDLYGGEK,EGERPENK,INAAAIEDR,YPLNSTDPTTER,SNPGDFTLSVR	SGTVVQLR,DGEVTHIK,LVDEPPPPLAPR,EFELTSDTNPIPR,TVPTERVFNEPR,IIVMTTK,EAETMILDK,EQGLDCEIDISK,VISTQTIEALTNVLK,IQNVGDFYDLYGGEK,EGERPENK,INAAAIEDR,YPLNSTDPTTER,TPFNATR,SNPGDFTLSVR,DLYSPEETENLK,NGQIIEMK	lcl|c237550_g1_i2|m.23394,lcl|c237550_g1_i1|m.23390	lcl|c239746_g1_i12|m.26271,lcl|c239746_g1_i13|m.26273,lcl|c239746_g1_i15|m.26274,lcl|c237550_g1_i2|m.23394,lcl|c237550_g1_i1|m.23390,lcl|c229460_g5_i1|m.14276,lcl|c239746_g1_i10|m.26266	P41499,P35235,Q06124,Q90687	P41499,O60502,Q8VIJ5,Q9EQQ9,O75899,Q9Z0U4,P35235,Q06124,Q90687
GO:0036499	biological_process	PERK-mediated unfolded protein response	0.000347	29	0.000318	26	-0.127321	0.744	1	0.000323	0.000296	-0.124853	0.744	1	0.944	WTNATDPSAR,APSPEEADEESR,APSPEEADEESRR,VVTESDEAELAK,SSFDDTDALPK,ETGILALSSEAK,MPVFDTR	WTNATDPSAR,YDFEFFTK,APSPEEADEESR,VKPDSSDVMENIR,LAIVDDLHGMQPMR,VVTESDEAELAK,LAVGDPSVLDELDLDEK,SSFDDTDALPK,ETGILALSSEAK,QIFEELFPGQSQFIPY,MPVFDTR	lcl|c227267_g3_i2|m.12289,lcl|c237215_g1_i1|m.23031	lcl|c227267_g3_i2|m.12289,lcl|c237215_g1_i1|m.23031	P49088,Q5R6W9,P17714,P19891,P05198,P08243,Q1LZA3,Q61024,Q5ZJU3	P49088,Q5R6W9,P17714,P19891,P05198,P08243,Q1LZA3,Q61024,Q5ZJU3
GO:0060124	biological_process	positive regulation of growth hormone secretion	0	0	3.67e-05	3	null	0.0801	1	1.08e-05	4.39e-05	2.02715	0.173	1	0.718		VISTQTIEALTNVLK,DLYSPEETENLK,TVPTERVFNEPR		lcl|c239746_g1_i12|m.26271,lcl|c239746_g1_i13|m.26273,lcl|c239746_g1_i15|m.26274,lcl|c229460_g5_i1|m.14276,lcl|c239746_g1_i10|m.26266		O60502,Q8VIJ5,Q9EQQ9,O75899,Q9Z0U4
GO:0035162	biological_process	embryonic hemopoiesis	9.58e-05	8	0.000159	13	0.73066	0.255	1	9.69e-05	0.000154	0.66458	0.277	1	0.833	DGPSVQSELLTR,EAQSCNNDEGGLR,LSGGDSNESR,TSSDAGSPSQEAK	DGPSVQSELLTR,YITLPFK,EAQSCNNDEGGLR,AEYGAILAR,TSSDAGSPSQEAK,FSYIVGSNAR	lcl|c220629_g1_i3|m.7038,lcl|c223277_g3_i4|m.8995,lcl|c220629_g1_i1|m.7036,lcl|c241027_g2_i2|m.28089,lcl|c241027_g2_i3|m.28090,lcl|c241027_g2_i9|m.28096,lcl|c241027_g2_i4|m.28092,lcl|c220629_g1_i5|m.7042,lcl|c220629_g1_i6|m.7044,lcl|c220629_g1_i4|m.7040,lcl|c241027_g2_i5|m.28094	lcl|c220629_g1_i3|m.7038,lcl|c223277_g3_i4|m.8995,lcl|c220629_g1_i1|m.7036,lcl|c244194_g2_i1|m.31876,lcl|c241027_g2_i2|m.28089,lcl|c241027_g2_i3|m.28090,lcl|c241027_g2_i9|m.28096,lcl|c241027_g2_i4|m.28092,lcl|c220629_g1_i5|m.7042,lcl|c220629_g1_i6|m.7044,lcl|c241027_g2_i5|m.28094	P05126,Q9JLB4,P05128,P05129,Q7SY24,O57460,Q25378,P17252,P90980,P05130,Q4R4U2,P05772,P05771,P05696,Q13769,Q16974,P10102,P04409,P13677,P68404,P68403,Q7LZQ8,P63318,P63319,Q6NY52,Q8JI28,P10829,P20444,A8KBH6	P05126,Q9JLB4,P05128,P05129,Q7SY24,O57460,Q25378,P17252,P90980,P05130,Q4R4U2,P05772,P05771,P05696,Q13769,Q16974,P10102,P04409,P13677,P68404,P68403,Q7LZQ8,P63318,P63319,Q6NY52,Q8JI28,P10829,P20444,A8KBH6
GO:0036493	biological_process	positive regulation of translation in response to endoplasmic reticulum stress	7.19e-05	6	0.00011	9	0.615183	0.415	1	7.54e-05	0.00011	0.541723	0.443	1	0.892	ETGYVPSNYVK,LTIIDDSK,AIEVAPWDPDLR	LFLVKPFDEGLM,GATDGDFLVR,ETGYVPSNYVK,AIEVAPWDPDLR	lcl|c223357_g4_i3|m.9060,lcl|c231996_g3_i3|m.16899	lcl|c223357_g4_i3|m.9060,lcl|c231996_g3_i3|m.16899	Q13217,Q99M51	Q13217,Q99M51
GO:1901222	biological_process	regulation of NIK/NF-kappaB signaling	0.0113767	950	0.0100522	822	-0.178568	0.00895	1	0.0102422	0.00903205	-0.181403	0.00792	1	0.129	GILETNFNTLQTK,ILAGDKPYITVEELR,LEPLEFQQCLVSLGYDVK,LAVLQDVDSLLLEFAK,GEWIHPEIDNPEYQPDDALYKY,QITVNDLPVGR,VFDSSLDQK,MASDLLDWISK,QIDNPNYKGEWIHPEIDNPEYQPDDALY,MDELELVHQDVQEAM,QIDNPNYKGEWIHPEIDNPEYQPDDAL,ANVVGEWIK,FAIQDINIEESAAK,IMAIVDPNGTGYVTF,ALQFVYSK,DSDGTLNDIQNKLDALR,VNGSLAVSR,ILAGDKPYITVEE,LSWIQPSEIDLTNK,TLVVQFQVK,ILAGDKPYITVEEL,FYNDADLDKGIQTSEDAKF,SPEEVDQR,GEWIHPEIDNPEYQPDDA,GLFIIDDK,AAQELER,MKDEQD…	GILETNFNTLQTK,ILAGDKPYITVEELR,LEPLEFQQCLVSLGYDVK,QITVNDLPVGR,DDPLGNLNLAFEVADK,VFDSSLDQK,MASDLLDWISK,QIDNPNYKGEWIHPEIDNPEYQPDDALY,MDELELVHQDVQEAM,QIDNPNYKGEWIHPEIDNPEYQPDDAL,ANVVGEWIK,FAIQDINIEESAAK,QMHGDSPYL,IMAIVDPNGTGYVTF,ALQFVYSK,DSDGTLNDIQNKLDALR,ILAGDKPYITVEE,LSWIQPSEIDLTNK,SGTIFDNILVTD,TLVVQFQVK,MLPWLQDRDSDGTLNDIQNK,ILAGDKPYITVEEL,FYNDADLDKGIQTSEDAKF,SPEEVDQR,GEWIHPEIDNPEYQPDDA,GLFIIDDK,APA…	lcl|c217466_g1_i2|m.5214,lcl|c217466_g1_i3|m.5215,lcl|c243758_g2_i1|m.31278,sp|PRDX1_HUMAN|,lcl|c240346_g7_i3|m.27102,lcl|c243788_g1_i5|m.31318,lcl|c236125_g1_i5|m.21737,lcl|c227562_g6_i1|m.12582,lcl|c210580_g1_i3|m.2210,lcl|c237325_g2_i1|m.23163,lcl|c234934_g3_i3|m.20432,lcl|c227939_g2_i10|m.12908,lcl|c241650_g2_i3|m.28825,lcl|c220219_g3_i2|m.6822,lcl|c227939_g2_i2|m.12910,lcl|c231068_g6_i2|m.15…	lcl|c217466_g1_i2|m.5214,lcl|c217466_g1_i3|m.5215,lcl|c243758_g2_i1|m.31278,sp|PRDX1_HUMAN|,lcl|c240346_g7_i3|m.27102,lcl|c243788_g1_i5|m.31318,lcl|c227562_g6_i1|m.12582,lcl|c210580_g1_i3|m.2210,lcl|c237325_g2_i1|m.23163,lcl|c234934_g3_i3|m.20432,lcl|c227939_g2_i10|m.12908,lcl|c241650_g2_i3|m.28825,lcl|c220219_g3_i2|m.6822,lcl|c227939_g2_i2|m.12910,lcl|c240080_g3_i4|m.26749,lcl|c231068_g6_i2|m.15…	O02649,Q08043,P35814,Q2PFV7,P12814,Q9Y4K3,P18687,L7UZ85,P05094,P20111,Q5NVM5,Q7PKQ5,P18091,P25420,Q9VMN5,Q8NF91,P35609,P50140,P29185,Q05046,P14211,P57780,Q3ZC55,Q3B7N2,P10809,A5D7D1,Q7TPR4,Q90734,Q9Z1P2,O08807,P29197,Q0III9,P31081,Q60803,Q5ZL72,P0CB50,O88990,Q9JI91,Q9Y2R2,Q06830,Q61382,Q43298,O74261,Q9QXQ0,Q3SWY2,Q5RCS6,O43707,P63038,P63039	O02649,Q08043,P35814,Q2PFV7,P12814,P18687,L7UZ85,P05094,P20111,Q5NVM5,Q7PKQ5,P18091,P25420,Q9VMN5,Q8NF91,P35609,P50140,P29185,Q05046,P14211,P57780,Q3ZC55,Q3B7N2,P10809,A5D7D1,Q7TPR4,Q90734,Q9Z1P2,O08807,P29197,Q0III9,P31081,Q60803,Q5ZL72,P0CB50,O88990,Q9JI91,Q9Y2R2,Q12933,Q06830,Q61382,Q43298,O74261,Q9QXQ0,Q3SWY2,Q5RCS6,O43707,P63038,P63039
GO:0019919	biological_process	peptidyl-arginine methylation, to asymmetrical-dimethyl arginine	3.59e-05	3	0	0	null	0.0865	1	4.31e-05	1.1e-05	-1.97285	0.187	1	0.721	VEESTNGMEVDSSTANHVDEVSK,VALTEPLVDVVEAK		lcl|c222225_g1_i3|m.8190,lcl|c222225_g1_i1|m.8189		Q99873
GO:0036494	biological_process	positive regulation of translation initiation in response to endoplasmic reticulum stress	3.59e-05	3	4.89e-05	4	0.445258	0.685	1	4.31e-05	5.49e-05	0.349078	0.718	1	0.933	AIEVAPWDPDLR	AIEVAPWDPDLR	lcl|c223357_g4_i3|m.9060	lcl|c223357_g4_i3|m.9060	Q13217	Q13217
GO:0060120	biological_process	inner ear receptor cell fate commitment	0	0	1.22e-05	1	null	0.312	1	1.08e-05	2.19e-05	1.02715	0.553	1	0.892		NEQEMQQLIIEEK		lcl|c224337_g8_i7|m.9748		P31266
GO:1901224	biological_process	positive regulation of NIK/NF-kappaB signaling	0.0104426	872	0.00893938	731	-0.224236	0.00182	1	0.00940216	0.00803336	-0.226988	0.0016	1	0.0405	GILETNFNTLQTK,ILAGDKPYITVEELR,LEPLEFQQCLVSLGYDVK,LAVLQDVDSLLLEFAK,GEWIHPEIDNPEYQPDDALYKY,VFDSSLDQK,MASDLLDWISK,QIDNPNYKGEWIHPEIDNPEYQPDDALY,MDELELVHQDVQEAM,QIDNPNYKGEWIHPEIDNPEYQPDDAL,ANVVGEWIK,FAIQDINIEESAAK,IMAIVDPNGTGYVTF,ALQFVYSK,DSDGTLNDIQNKLDALR,ILAGDKPYITVEE,LSWIQPSEIDLTNK,TLVVQFQVK,ILAGDKPYITVEEL,FYNDADLDKGIQTSEDAKF,SPEEVDQR,GEWIHPEIDNPEYQPDDA,AAQELER,MKDEQDEK,IESPNWMAPEVLQK,AWGNLEASEK,ML…	GILETNFNTLQTK,ILAGDKPYITVEELR,LEPLEFQQCLVSLGYDVK,DDPLGNLNLAFEVADK,VFDSSLDQK,MASDLLDWISK,QIDNPNYKGEWIHPEIDNPEYQPDDALY,MDELELVHQDVQEAM,QIDNPNYKGEWIHPEIDNPEYQPDDAL,ANVVGEWIK,FAIQDINIEESAAK,QMHGDSPYL,IMAIVDPNGTGYVTF,ALQFVYSK,DSDGTLNDIQNKLDALR,ILAGDKPYITVEE,LSWIQPSEIDLTNK,SGTIFDNILVTD,TLVVQFQVK,MLPWLQDRDSDGTLNDIQNK,ILAGDKPYITVEEL,FYNDADLDKGIQTSEDAKF,SPEEVDQR,GEWIHPEIDNPEYQPDDA,AAQELER,MKDEQDEK,IESPNWM…	lcl|c210580_g1_i3|m.2210,lcl|c217466_g1_i2|m.5214,lcl|c217466_g1_i3|m.5215,lcl|c243758_g2_i1|m.31278,lcl|c234934_g3_i3|m.20432,lcl|c240346_g7_i3|m.27102,lcl|c220219_g3_i2|m.6822,lcl|c243788_g1_i5|m.31318,lcl|c236125_g1_i5|m.21737,lcl|c231068_g6_i2|m.15939	lcl|c210580_g1_i3|m.2210,lcl|c217466_g1_i2|m.5214,lcl|c217466_g1_i3|m.5215,lcl|c243758_g2_i1|m.31278,lcl|c234934_g3_i3|m.20432,lcl|c240346_g7_i3|m.27102,lcl|c220219_g3_i2|m.6822,lcl|c243788_g1_i5|m.31318,lcl|c240080_g3_i4|m.26749,lcl|c231068_g6_i2|m.15939	O02649,A5D7D1,Q08043,Q7TPR4,Q90734,Q9Z1P2,Q2PFV7,P29197,P12814,Q9Y4K3,P18687,Q0III9,L7UZ85,P31081,P05094,Q60803,P20111,Q5NVM5,Q5ZL72,O88990,Q7PKQ5,P18091,Q9JI91,P25420,Q9VMN5,Q8NF91,P35609,P50140,P29185,Q05046,Q61382,Q43298,Q9QXQ0,O74261,P14211,Q5RCS6,Q3SWY2,O43707,P57780,Q3ZC55,P63038,Q3B7N2,P63039,P10809	O02649,A5D7D1,Q08043,Q7TPR4,Q90734,Q9Z1P2,Q2PFV7,P29197,P12814,P18687,Q0III9,L7UZ85,P31081,P05094,Q60803,P20111,Q5NVM5,Q5ZL72,O88990,Q7PKQ5,P18091,Q9JI91,P25420,Q9VMN5,Q8NF91,Q12933,P35609,P50140,P29185,Q05046,Q61382,Q43298,Q9QXQ0,O74261,P14211,Q5RCS6,Q3SWY2,O43707,P57780,Q3ZC55,P63038,Q3B7N2,P63039,P10809
GO:1901223	biological_process	negative regulation of NIK/NF-kappaB signaling	3.59e-05	3	2.45e-05	2	-0.554742	0.672	1	4.31e-05	3.29e-05	-0.387888	0.724	1	0.933	NGPSSPDLEQLK,YGVASMQGWR,VNGSLAVSR	NGPSSPDLEQLK	lcl|c237325_g2_i1|m.23163	lcl|c237325_g2_i1|m.23163	P35814	P35814
GO:0036490	biological_process	regulation of translation in response to endoplasmic reticulum stress	7.19e-05	6	0.00011	9	0.615183	0.415	1	7.54e-05	0.00011	0.541723	0.443	1	0.892	ETGYVPSNYVK,LTIIDDSK,AIEVAPWDPDLR	LFLVKPFDEGLM,GATDGDFLVR,ETGYVPSNYVK,AIEVAPWDPDLR	lcl|c223357_g4_i3|m.9060,lcl|c231996_g3_i3|m.16899	lcl|c223357_g4_i3|m.9060,lcl|c231996_g3_i3|m.16899	Q13217,Q99M51	Q13217,Q99M51
GO:0035160	biological_process	maintenance of epithelial integrity, open tracheal system	5.99e-05	5	8.56e-05	7	0.515648	0.539	1	6.46e-05	8.78e-05	0.442187	0.569	1	0.892	IAEVDELSPEMGER,SGQLSSDQCK	IAEVDELSPEMGER,SGQLSSDQCK,QNAQWDTGENPIFK,YCDECPSCVGK	lcl|c236015_g2_i16|m.21586	lcl|c236015_g2_i16|m.21586	P11584	P11584
GO:0036491	biological_process	regulation of translation initiation in response to endoplasmic reticulum stress	3.59e-05	3	4.89e-05	4	0.445258	0.685	1	4.31e-05	5.49e-05	0.349078	0.718	1	0.933	AIEVAPWDPDLR	AIEVAPWDPDLR	lcl|c223357_g4_i3|m.9060	lcl|c223357_g4_i3|m.9060	Q13217	Q13217
GO:0060125	biological_process	negative regulation of growth hormone secretion	0.000695	58	0.000734	60	0.0791303	0.766	1	0.000635	0.000669	0.075244	0.775	1	0.944	SGTVVQLR,DGEVTHIK,LVDEPPPPLAPR,EFELTSDTNPIPR,YLQEFEYSDYTLR,IIVMTTK,EAETMILDK,EQGLDCEIDISK,IQNVGDFYDLYGGEK,EGERPENK,INAAAIEDR,YPLNSTDPTTER,SNPGDFTLSVR	SGTVVQLR,DGEVTHIK,LVDEPPPPLAPR,EFELTSDTNPIPR,IIVMTTK,EAETMILDK,EQGLDCEIDISK,IQNVGDFYDLYGGEK,EGERPENK,INAAAIEDR,YPLNSTDPTTER,TPFNATR,SNPGDFTLSVR,NGQIIEMK	lcl|c237550_g1_i2|m.23394,lcl|c237550_g1_i1|m.23390	lcl|c237550_g1_i2|m.23394,lcl|c237550_g1_i1|m.23390	P41499,P35235,Q06124,Q90687	P41499,P35235,Q06124,Q90687
GO:0061458	biological_process	reproductive system development	8.38e-05	7	6.11e-05	5	-0.455206	0.588	1	8.62e-05	6.58e-05	-0.387888	0.618	1	0.908	LAEPSLMLK,FGGIEALVR,ALNNSSDAETTR	SGGIPALVR,ALNNSSDAETTR	lcl|c241349_g1_i1|m.28471	lcl|c241349_g1_i1|m.28471	P30998,P26233,Q6P0K8,Q9WU82,B6V8E6,Q29I35,P14923,P35224,P35223,P35222,Q02453,Q8WNW3,Q0VCX4,P18824,Q17GS9,Q02257,Q02248,F1QGH7,Q7QHW5,Q8SPJ1	P30998,P26233,Q6P0K8,Q9WU82,B6V8E6,Q29I35,P14923,P35224,P35223,P35222,Q02453,Q8WNW3,Q0VCX4,P18824,Q17GS9,Q02257,Q02248,F1QGH7,Q7QHW5,Q8SPJ1
GO:0048485	biological_process	sympathetic nervous system development	0.000431	36	0.000416	34	-0.0522414	0.88	1	0.000398	0.000384	-0.0530206	0.876	1	0.985	TTQSVIVTGR,SDSSVQGTGFR,NDNGGFNR,IWNNNYGFYR	TTQSVIVTGR,SDSSVQGTGFR,NDNGGFNR,IWNNNYGFYR	lcl|c214211_g3_i3|m.3396	lcl|c214211_g3_i3|m.3396	O14786	O14786
GO:0050795	biological_process	regulation of behavior	0.0106342	888	0.011055	904	0.0559838	0.409	1	0.00957448	0.00993196	0.0528841	0.435	1	0.892	TGEDGDFLWPGFGENCR,LGIHEDSVNR,VVSFDVPPQEVLTK,IGIQVTDSPYVV,CVVVGDGAVGK,EYYDEQLGDDLPQAVLDE,NSTVLFPLPVDF,DPFAMRPFFGYNFGR,VLGDGDFVK,APFDLFENR,TVFDEAIR,LLAQTTLR,GNFDSLPVK,TDPHDVAR,DNSTLGYMAAK,TMYMIPFSMGPVGSPVSK,YITGAFPSACGK,IYDATTSITNVENANR,VQDYVADKVK,VQDYVADK,LREYYDEQLGDDLPQAV,AINPESGFFGVAPGSSY,TYICTENK,NLSDILADRETI,TVEVLEPEVR,MGDNVMEVLDDGDFVK,NLSEILGER,EAADVISESPSALQLR,AETETEFQEWMK,LVICDGSQEENEGLLK,Q…	TGEDGDFLWPGFGENCR,CVVVGDGAVGK,NSTVLFPLPVDF,DPFAMRPFFGYNFGR,TVFDEAIR,APFDLFENR,LLAQTTLR,GNFDSLPVK,TDPHDVAR,SSILSNDMSSLK,LREYYDEQLGDDLPQAV,HLEVNPDHSIVETLR,AETETEFQEWMK,LVICDGSQEENEGLLK,IFHVNWFR,YGEYFPGTGDLR,LLMELGIASPLK,QDLINNLGTIAK,LCEPDKLVICDGSQEENEGLLK,LPQQLQR,ISDPTMSVTNVEK,NSTVLFPLPV,LPENFTVEK,TIRPDNMSEYTK,ALLFLPR,LGQWMSVTEMNENLATR,VVTGQLQPNR,LGGTLMSNWPR,EMLQQNK,YLQTLTAISAEK,FYEQFGK,SLTNDWEEHLA…	lcl|c228245_g4_i5|m.13161,lcl|c224672_g2_i1|m.10058,lcl|c229550_g1_i3|m.14392,lcl|c218214_g1_i1|m.5632,lcl|c218214_g1_i1|m.5633,lcl|c218214_g1_i2|m.5634,lcl|c244474_g2_i1|m.32252,lcl|c225611_g1_i4|m.10766,lcl|c226607_g5_i2|m.11621,lcl|c232847_g2_i2|m.17831,lcl|c239444_g1_i9|m.25795,lcl|c201183_g1_i1|m.1186,lcl|c224694_g1_i1|m.10068,lcl|c224672_g1_i1|m.10055,lcl|c232843_g1_i2|m.17829,lcl|c228245_g…	lcl|c229550_g1_i3|m.14392,lcl|c224672_g2_i1|m.10058,lcl|c218214_g1_i1|m.5632,lcl|c218214_g1_i1|m.5633,lcl|c218214_g1_i2|m.5634,lcl|c244474_g2_i1|m.32252,lcl|c226607_g5_i2|m.11621,lcl|c239444_g1_i9|m.25795,lcl|c232847_g2_i2|m.17831,lcl|c201183_g1_i1|m.1186,lcl|c224694_g1_i1|m.10068,lcl|c224672_g1_i1|m.10055,lcl|c232843_g1_i2|m.17829,lcl|c228245_g4_i3|m.13160,lcl|c232843_g1_i4|m.17830,lcl|c217198_g…	Q9Z755,P07901,P07900,Q5L4X1,O42227,Q256B8,P56519,P56518,P56517,Q6GQD1,Q90YM8,Q07078,Q32PJ8,P26819,Q7TMB8,P26818,P26817,P62998,P62999,Q94517,Q8HYZ4,P21642,O97627,Q2KJ93,Q8STF6,P04809,P40792,Q9VF87,Q09639,Q9Z2V4,P82995,P36181,Q8BH04,Q4R4P1,Q5R710,P70288,P34147,Q7PT10,P29190,O61998,O02192,P05153,Q4QQW4,Q04619,Q9BLC5,P35626,Q13547,O44518,Q27433,Q7L576,Q5RAG0,Q91695,Q18688,P46633,P60766,A3DJE3,Q299G2,…	Q9Z755,P07901,P07900,Q5L4X1,O42227,Q256B8,P56519,P56518,P56517,Q6GQD1,Q90YM8,Q07078,Q32PJ8,P26819,Q7TMB8,P26818,P26817,P62998,P62999,Q94517,Q8HYZ4,P21642,O97627,Q2KJ93,P04809,P40792,Q9VF87,Q09639,P82995,Q9Z2V4,P36181,Q4R4P1,Q8BH04,Q5R710,P70288,Q7PT10,P29190,O61998,O02192,P05153,Q4QQW4,Q04619,Q9BLC5,P35626,Q13547,O44518,Q27433,Q7L576,Q5RAG0,Q91695,Q18688,P46633,P60766,A3DJE3,Q299G2,Q5R414,P25098,…
GO:0050796	biological_process	regulation of insulin secretion	0.0105743	883	0.0103946	850	-0.0247299	0.72	1	0.00952063	0.00933933	-0.0277375	0.687	1	0.928	TGEDGDFLWPGFGENCR,GGAPSAFDR,IGIQVTDSPYVV,CVVVGDGAVGK,EYYDEQLGDDLPQAVLDE,DPFAMRPFFGYNFGR,VLGDGDFVK,SSSTDASPQSPR,TVFDEAIR,IIVMTTK,DIDIAMK,LSPQALNVIVK,GNFDSLPVK,TDPHDVAR,EVWAMVK,TMYMIPFSMGPVGSPVSK,YITGAFPSACGK,TTFMQYDSDR,GINLSGGQK,VQDYVADKVK,VQDYVADK,LREYYDEQLGDDLPQAV,FAGLTPSPELQEWR,AINPESGFFGVAPGSSY,TYICTENK,MGDNVMEVLDDGDFVK,ITVTTEPK,SLPSMTSTPSAVQDAK,LVDEPPPPLAPR,LVICDGSQEENEGLLK,QYYDEQLGEDLPQEVSDE…	TGEDGDFLWPGFGENCR,ASVYTEDGSR,CVVVGDGAVGK,DPFAMRPFFGYNFGR,TVFDEAIR,LSPQALNVIVK,DIDIAMK,GNFDSLPVK,TDPHDVAR,EVWAMVK,TTFMQYDSDR,SSILSNDMSSLK,GINLSGGQK,LREYYDEQLGDDLPQAV,NGQIIEMK,LVDEPPPPLAPR,LVICDGSQEENEGLLK,IFHVNWFR,TFSLYDKDNSGNMDIFELR,YGEYFPGTGDLR,FNATQNHTACVESDSDGK,LLMELGIASPLK,LCEPDKLVICDGSQEENEGLLK,EAETMILDK,LIDDDNYPR,EGERPENK,YPLNSTDPTTER,LSPQALNVIVKR,LPENFTVEK,TIRPDNMSEYTK,SGTVVQLR,LGQWMSVTEMN…	lcl|c237550_g1_i2|m.23394,lcl|c237550_g1_i1|m.23390,lcl|c235481_g2_i1|m.20956,lcl|c244474_g2_i1|m.32252,lcl|c226071_g2_i11|m.11178,lcl|c227646_g4_i2|m.12636,lcl|c223277_g3_i4|m.8995,lcl|c224694_g1_i1|m.10068,lcl|c224672_g1_i1|m.10055,lcl|c226071_g2_i7|m.11182,lcl|c229342_g3_i1|m.14174,lcl|c230104_g4_i1|m.14959,lcl|c226071_g2_i1|m.11176,lcl|c222307_g1_i1|m.8241,lcl|c224672_g2_i1|m.10058,lcl|c21821…	lcl|c228683_g1_i7|m.13540,lcl|c237550_g1_i2|m.23394,lcl|c237550_g1_i1|m.23390,lcl|c216172_g1_i1|m.4420,lcl|c235481_g2_i1|m.20956,lcl|c244474_g2_i1|m.32252,lcl|c226071_g2_i11|m.11178,lcl|c227646_g4_i2|m.12636,lcl|c228623_g7_i1|m.13472,lcl|c223277_g3_i4|m.8995,lcl|c224694_g1_i1|m.10068,lcl|c224672_g1_i1|m.10055,lcl|c226071_g2_i7|m.11182,lcl|c226071_g2_i1|m.11176,lcl|c229460_g5_i1|m.14276,lcl|c22467…	Q7FB56,Q7GB25,A7KVC2,Q54JR2,Q63054,O42227,P32386,Q5RAG9,Q32PJ8,Q54LE6,Q8VZZ4,Q54V86,P05696,Q8T6H3,Q8T6H8,Q9QYM0,P40792,Q867C9,Q9Z2V4,O88563,Q8BH04,Q9LZJ5,P60879,P30626,P47860,Q06124,Q27665,P29190,Q27778,P47858,P47859,Q4QQW4,P60878,P60877,P47857,O70589,P10102,Q5T3U5,Q54VJ0,O35379,P60881,Q5RAG0,P60880,Q5R1X1,Q7LZQ8,P60766,P05126,P05128,P05129,P54936,Q864R9,B2RX12,Q25378,Q0IIG5,A0A0D1CZ63,Q9C8G9,P05…	Q9Z755,P78426,Q7FB56,Q5L4X1,Q7GB25,A7KVC2,Q54JR2,O42227,Q256B8,P56519,P32386,P56518,P56517,P41499,Q32PJ8,Q54LE6,Q04999,Q28689,Q8VZZ4,Q54V86,P62998,P62999,Q94517,Q8HYZ4,P21642,P05696,Q8T6H3,Q2KJ93,P04409,Q9R1S7,Q8T6H8,Q9QYM0,P40792,Q9Z2V4,P20444,O88563,Q8BH04,Q9LZJ5,A8KBH6,P60879,P30626,P70288,Q7SY24,P35235,O60706,Q06124,P29190,P17252,P17491,P05153,Q4QQW4,P60878,P60877,Q6Y306,O70589,Q5R4U9,Q13547,…
GO:0050793	biological_process	regulation of developmental process	0.105959	8848	0.102393	8373	-0.049386	0.0177	1	0.0953032	0.0919008	-0.0524478	0.0123	1	0.167	STSIPSSGQK,ENLLTDDLGR,YGENPFGCYK,IFNIYPR,FITEEAR,YNPTEVGR,SGQDLLDSGHY,VQEEYIKDEQK,NSPAIIFIDEIDAIAPK,TCPSDEIIADAWAR,TSWLDGK,VYWSDVDAK,NKPTTQGDCSLETK,FLPDCVGPEVEEACLSPSPGSVILLENLR,DHQAELEGAYNELLQLAAAR,YMTPENLIR,DNVTSTTR,AAVGYEYK,IISFTELEELGK,IGSSGAPVTDQSEETR,LMDEAMCSR,YMDAASGKDGDPASPSVV,ETMENQSIIGDFNK,NAQSSSGGGSFNR,LTTFELR,SEEDRITEAEKNER,HLTYENVER,HPLDSASTDLLEVSR,TVELALWDTAGQEDYDR,TLFPGNDHIDQLT,QAD…	STSIPSSGQK,IFNIYPR,FITEEAR,SGQDLLDSGHY,TSWLDGK,DHQAELEGAYNELLQLAAAR,IISFTELEELGK,IGSSGAPVTDQSEETR,YMDAASGKDGDPASPSVV,HLTYENVER,TVELALWDTAGQEDYDR,YGEYFPGTGDLR,DLESSNELSNHLA,MLDAEEMVNMAKPDER,TIRPDNMSEYTK,DADIGVAESNR,ETWLNENQR,DKVLSSDDYGK,RLAELVK,VVTGQLQPNR,MGSSSAAAAAEASH,FYLGGVPEGFNSK,RPISADSAIMNPK,LTEEQAQK,GEWIHPEIDNPEYQPDDAL,TLDEIQNLDADDESLV,IGASVTDEEK,SINPDISLHPDHIGGMRLAVASFAGIE,TTEMETIYDLGTK,NL…	lcl|c242947_g1_i3|m.30437,lcl|c232931_g1_i9|m.17924,lcl|c235115_g6_i1|m.20588,lcl|c241874_g1_i8|m.29086,lcl|c221676_g4_i8|m.7788,lcl|c232719_g2_i1|m.17712,lcl|c226071_g2_i11|m.11178,lcl|c222946_g2_i3|m.8728,lcl|c233948_g1_i2|m.19238,lcl|c241874_g1_i8|m.29081,lcl|c241874_g1_i8|m.29082,lcl|c236422_g1_i6|m.22099,lcl|c237457_g1_i3|m.23289,lcl|c221676_g4_i4|m.7786,lcl|c226071_g2_i7|m.11182,lcl|c243541…	lcl|c242947_g1_i3|m.30437,lcl|c232931_g1_i9|m.17924,lcl|c235115_g6_i1|m.20588,lcl|c241874_g1_i8|m.29086,lcl|c221676_g4_i8|m.7788,lcl|c232719_g2_i1|m.17712,lcl|c226071_g2_i11|m.11178,lcl|c222946_g2_i3|m.8728,lcl|c233948_g1_i2|m.19238,lcl|c241874_g1_i8|m.29081,lcl|c241874_g1_i8|m.29082,lcl|c221676_g4_i4|m.7786,lcl|c226071_g2_i7|m.11182,lcl|c243541_g3_i2|m.31058,lcl|c224773_g5_i3|m.10121,lcl|c241817…	Q9Y265,Q9SAF5,A3KP59,Q7ZXV3,P17427,P17426,P54614,Q9JJ19,P54613,P54612,Q5R7D3,F6XBL2,Q8VHF0,Q9N1U2,Q54V86,Q92973,Q9Z2U1,Q9UKU0,O14786,Q23716,O14787,Q4TVV3,P05696,Q54UW5,P98200,P51113,P98204,P36179,P62490,P39688,Q99LG2,Q5R9I6,Q6DRG7,O00160,A5DKH0,Q4QQT4,Q9UKV3,Q5ZKU5,P61158,P61157,P36181,Q9LZJ5,A1DBH2,P49001,Q05036,Q9VFI9,Q64487,Q40079,Q40078,Q0III9,O61998,O60423,P61161,P61160,P62491,P62492,Q21313,…	Q9Y265,Q9SAF5,Q7ZXV3,P17427,P17426,P54614,Q9JJ19,P54613,P54612,Q5R7D3,F6XBL2,Q8VHF0,Q9N1U2,Q54V86,Q9DB30,Q92973,Q9Z2U1,Q9UKU0,O14786,Q23716,O14787,Q4TVV3,P05696,Q68FS3,Q54UW5,P98200,P51113,P98204,P36179,P62490,P39688,Q9P225,Q99LG2,P37276,Q5R9I6,Q6DRG7,O00160,A5DKH0,Q4QQT4,Q5ZKU5,P61158,P61157,P36181,Q9LZJ5,Q8VHE6,P23098,A1DBH2,P49001,Q9Z136,Q05036,O55081,Q9VFI9,Q64487,Q40079,Q40078,Q0III9,O61998,…
GO:0050794	biological_process	regulation of cellular process	0.283507	23674	0.284018	23225	0.00259585	0.818	1	0.254978	0.254895	-0.000474	0.967	1	0.992	STSIPSSGQK,TGAASSSSASSPAVQELR,IFNIYPR,FITEEAR,QTNTSQWEMPSDEAATKV,DIDIAMK,NSPAIIFIDEIDAIAPK,GNFDSLPVK,LANPNNQFR,LFTDLREI,LASQFITR,DLIDLIAK,IISFTELEELGK,QVEHEEDEDGISDENLK,DADQSSFMDSK,YMDAASGKDGDPASPSVV,LLEPVVNMTDMLR,INEKPQVI,ETMENQSIIGDFNK,EAFDDSIADLDK,GAVIVGDPEVGLVK,HLTYENVER,TLFPGNDHIDQLT,YGEYFPGTGDLR,ATTNEASSGVEK,DVIELTDGNFEAEVLNTK,QLENSNLDPR,NQTGEIPLAPNPGWTT,APGAIGPYNQAVIADK,IQILSNGDLK,LAGPQLVQ…
GO:0048489	biological_process	synaptic vesicle transport	0.0140951	1177	0.0158243	1294	0.166944	0.00378	1	0.012687	0.014212	0.163762	0.00451	1	0.0877	VGVVNDLGGQLVDK,ENLLTDDLGR,IFNIYPR,GAIGIFYGNK,ATDLTTATR,YDNLMQQAAQR,SGQDLLDSGHY,GQELVDSDHSEK,LLYNNVSNFAK,LESDANQLCSEYQGEPEEPIIR,ASSLPDVDTFGK,GMEDLIPIMNK,DHQAELEGAYNELLQLAAAR,EIVAETDRETGSNK,GVADVTICQGK,FEGFQQELNANEK,LGDAQKQEDFNTGVK,QATGPLSNEDVIAAQPFMR,LTTFELR,NVDNRYDNLMQQAAQR,NLPDEHDDLNK,VEREPYNGPVIQLPTSQLPQIVSPSQR,HPLDSASTDLLEVSR,NIQENLVDK,TFEAEIQANKER,DIEDDIESNLLMPV,ADDPSTYTEVVEAANR,IEDLAVEPQR,SD…	HSLVEADIAAQADR,VGVVNDLGGQLVDK,ENLLTDDLGR,IFNIYPR,ATDLTTATR,YDNLMQQAAQR,SGQDLLDSGHY,GQELVDSDHSEK,LLYNNVSNFAK,LESDANQLCSEYQGEPEEPIIR,ASSLPDVDTFGK,NLPSTNPIECTVR,DHYATPEINEK,DHQAELEGAYNELLQLAAAR,IHDGSEEPATHNALAK,GVADVTICQGK,TQDLQEKYDNLK,FEGFQQELNANEK,LGDAQKQEDFNTGVK,QATGPLSNEDVIAAQPFMR,LTTFELR,NVDNRYDNLMQQAAQR,NLPDEHDDLNK,VEREPYNGPVIQLPTSQLPQIVSPSQR,VLADEREK,NIQENLVDK,VDAMAAPLAEK,TFEAEIQANKER,DIEDDIE…	lcl|c226782_g6_i6|m.11785,lcl|c235052_g1_i3|m.20523,lcl|c229351_g6_i3|m.14199,lcl|c201793_g1_i1|m.1223,lcl|c226176_g1_i2|m.11271,lcl|c232719_g2_i1|m.17712,lcl|c226782_g6_i4|m.11783,lcl|c238429_g5_i1|m.24515,lcl|c237643_g4_i5|m.23536,lcl|c229351_g6_i1|m.14197,lcl|c233141_g1_i1|m.18196,lcl|c234378_g4_i3|m.19775,lcl|c224073_g3_i3|m.9583,lcl|c214670_g8_i2|m.3578,lcl|c232719_g2_i11|m.17713,lcl|c229917…	lcl|c226782_g6_i6|m.11785,lcl|c235052_g1_i3|m.20523,lcl|c229351_g6_i3|m.14199,lcl|c201793_g1_i1|m.1223,lcl|c226176_g1_i2|m.11271,lcl|c232719_g2_i1|m.17712,lcl|c226782_g6_i4|m.11783,lcl|c238429_g5_i1|m.24515,lcl|c237643_g4_i5|m.23536,lcl|c229351_g6_i1|m.14197,lcl|c233141_g1_i1|m.18196,lcl|c238429_g5_i5|m.24520,lcl|c234378_g4_i3|m.19775,lcl|c224073_g3_i3|m.9583,lcl|c214670_g8_i2|m.3578,lcl|c232719_…	O70257,O64771,Q640K6,Q29I35,P18484,P17427,P17426,Q3UMM4,P11442,O08553,Q92572,Q7QG73,P07751,P20794,Q9EQF5,Q9HC10,Q5R9Y6,P30998,A0AVI2,B6V8E6,Q02453,Q01082,Q8WNW3,Q17GS9,Q0VCK5,P39054,P39053,Q52PJ5,P39055,Q5SPC5,P27636,P39052,O15020,Q0WLB5,P60879,O75923,Q13813,Q2RBN7,P15508,P18460,Q9UQ16,Q62188,Q00535,Q00534,Q07327,Q6GL72,Q8N165,Q6NU47,Q14195,Q14194,P60878,P60877,P53675,Q14117,Q69ZN7,Q9JME5,P35224,…	O70257,Q14204,O64771,Q640K6,Q29I35,P18484,M0R8U1,P17427,P17426,Q3UMM4,P11442,P38650,O08553,Q92572,Q9C1M7,Q7QG73,P07751,P20794,Q9EQF5,Q9HC10,Q5R9Y6,P30998,A0AVI2,B6V8E6,P34036,Q02453,Q01082,Q8WNW3,Q9P225,P37276,P39057,Q17GS9,Q0VCK5,P39054,P39053,Q27802,Q52PJ5,P39055,E9Q8T7,Q5SPC5,P27636,P45444,P39052,P45443,Q9JHU4,Q8VHE6,O15020,P23098,Q0WLB5,P60879,O75923,Q13813,Q2RBN7,P15508,P18460,O95295,Q9UQ16,…
GO:0072102	biological_process	glomerulus morphogenesis	5.99e-05	5	3.67e-05	3	-0.706745	0.498	1	6.46e-05	4.39e-05	-0.557813	0.547	1	0.892	VVTGQLQPNR,SGTPGSIQR	VVTGQLQPNR	lcl|c217198_g5_i5|m.5024	lcl|c217198_g5_i5|m.5024	A4UTP7	A4UTP7
GO:0098734	biological_process	macromolecule depalmitoylation	8.38e-05	7	1.22e-05	1	-2.77713	0.0365	1	8.62e-05	2.19e-05	-1.97285	0.0618	1	0.406	EMSDVNEWLK,SLIEEEIK,NGYNALGFSQGGQFFR,SVFLADINQEK	NGYNALGFSQGGQFFR	lcl|c232804_g4_i5|m.17788,lcl|c227266_g1_i1|m.12288	lcl|c232804_g4_i5|m.17788	Q3MHR0,Q8HXW6	Q8HXW6
GO:0048488	biological_process	synaptic vesicle endocytosis	0.00876605	732	0.00933071	763	0.0900601	0.225	1	0.00789437	0.00838455	0.0869091	0.242	1	0.804	SGDPTLGNIPWER,GAIGIFYGNK,VPVGDQPPDIEMLIR,ISGDTIFVTAPHEPTDGIIGVNR,LLYNNVSNFAK,TAAISHTK,EGNYEDVVR,GMEDLIPIMNK,EIVAETDRETGSNK,EEETPAEGGEEEKER,YDGEWSFEEPVTK,TLQIFNIEMK,NEDEEKEAEGK,SGLYETR,TFITQQGIK,GQFSTDDLVEEVEKR,ADDPSTYTEVVEAANR,SMAGEIGTLDPQMER,ASENAILWK,FINLFPEIK,DQEESKQDQPIV,IAAYLYK,NPGSQANADKTNAVVGPSK,LLLPWLEAK,FLQMAQK,CNEAAVWSLLAK,SECPADSSCCK,QNVNAAMVFEFLNR,TGEYEEK,LWEEVLNETNQ,VMEYITR,LHVIEVGTP…	SGDPTLGNIPWER,GLAVFISDIR,ISGDTIFVTAPHEPTDGIIGVNR,LLYNNVSNFAK,QLIDQVVQTALSETQDPEDVSCTVK,EGNYEDVVR,FQQVPSQQGQTSPLLQ,IHDGSEEPATHNALAK,EEETPAEGGEEEKER,IPDPDAEKPDDWDEDAPAKIPDADAK,YDGEWSFEEPVTK,TLQIFNIEMK,NEDEEKEAEGK,SGLYETR,SFLTSFADSETNR,TFITQQGIK,GQFSTDDLVEEVEKR,ADDPSTYTEVVEAANR,NNLAGAEELFV,AAEQAHLWSELV,FINLFPEIK,DQEESKQDQPIV,LSSGSWGCCPLRK,IAAYLYK,LLLPWLEAK,FLQMAQK,CNEAAVWSLLAK,VGLFTPDMAFEAIVK,SECPAD…	lcl|c226782_g6_i6|m.11785,lcl|c235052_g1_i3|m.20523,lcl|c231030_g9_i1|m.15904,lcl|c231030_g9_i1|m.15905,lcl|c226176_g1_i2|m.11271,lcl|c232719_g2_i1|m.17712,lcl|c226782_g6_i4|m.11783,lcl|c228700_g2_i5|m.13572,lcl|c222946_g2_i8|m.8729,lcl|c222946_g2_i3|m.8728,lcl|c222946_g2_i1|m.8727,lcl|c233141_g1_i1|m.18196,lcl|c234378_g4_i3|m.19775,lcl|c224073_g3_i3|m.9583,lcl|c221608_g1_i2|m.7757,lcl|c232719_g2…	lcl|c226782_g6_i6|m.11785,lcl|c235052_g1_i3|m.20523,lcl|c231030_g9_i1|m.15905,lcl|c226176_g1_i2|m.11271,lcl|c232719_g2_i1|m.17712,lcl|c226782_g6_i4|m.11783,lcl|c228700_g2_i5|m.13572,lcl|c222946_g2_i8|m.8729,lcl|c222946_g2_i3|m.8728,lcl|c222946_g2_i1|m.8727,lcl|c233141_g1_i1|m.18196,lcl|c234378_g4_i3|m.19775,lcl|c224073_g3_i3|m.9583,lcl|c228700_g2_i1|m.13568,lcl|c221608_g1_i2|m.7757,lcl|c232719_g2…	Q6NWK2,O64771,O00429,P50570,P18484,P54936,P17427,P17426,Q3UMM4,P11442,Q24210,Q5ZMP6,Q8BZ98,Q8N0W4,Q7QG73,P20794,P22137,P23785,P26990,P29742,Q7T6X2,Q8K1M6,Q08877,Q8NFZ3,O08839,Q801Q8,P35603,Q0VCK5,Q7SXN5,P39054,Q5NVF7,P39053,P39055,Q6FN53,P27636,Q96CW1,P39052,Q3ZC13,P24643,P21575,Q61851,Q05193,Q0WLB5,P25870,P61209,Q2RBN7,Q0WNJ6,P18460,Q68FD5,Q9UQ16,Q7ZW98,P84092,P51643,P84091,Q08DF4,P51644,Q29N38,…	Q6NWK2,O64771,O00429,P50570,P18484,P54936,P17427,P17426,Q3UMM4,P11442,Q24210,Q5ZMP6,Q8BZ98,Q8N0W4,Q7QG73,P20794,P22137,P23785,P26990,P29742,Q7T6X2,Q8K1M6,Q08877,O08839,Q801Q8,P35603,Q0VCK5,Q7SXN5,P39054,Q5NVF7,P39053,P39055,Q6FN53,P27636,Q96CW1,P39052,Q3ZC13,P20488,P24643,P21575,Q61851,Q05193,Q0WLB5,P25870,P61209,Q2RBN7,Q0WNJ6,P18460,Q68FD5,Q9UQ16,Q7ZW98,P84092,P51643,P84091,Q08DF4,P51644,Q29N38,…
GO:0050792	biological_process	regulation of viral process	0.0167896	1402	0.0169494	1386	0.0136616	0.801	1	0.0151102	0.0152217	0.0106025	0.845	1	0.968	TGEDGDFLWPGFGENCR,LAGESESNLR,IGIQVTDSPYVV,EHPNVQN,IYIPLPEASAR,TSLMNQYVNK,IFEEGPPPLPDAR,DPFAMRPFFGYNFGR,FTTEQEGIPGADIAK,GADCCVLVFDVTQPSTFK,NSPAIIFIDEIDAIAPK,DHFEEAMK,IHVLPIDDTVEGLTGNL,GNFDSLPVK,TDPHDVAR,TSWLDGK,SQPVYLGPPPSAQLDQVAADLIADAVLAK,NALAQETEVELY,LREYYDEQLGDDLPQAV,IVSQLLTLMDGLK,LLEPVVNMTDMLR,NAQSSSGGGSFNR,SLGYAYVNFQQPAAAER,QLQQIDGTLSTIEFQR,FQGLQSTSGDEPLR,ETVVEVPTTTWDDIGG,EVDEVVLVGGSTR,LVICD…	TGEDGDFLWPGFGENCR,GVEICIATPGR,LAGESESNLR,IYIPLPEASAR,IFEEGPPPLPDAR,DPFAMRPFFGYNFGR,GADCCVLVFDVTQPSTFK,DHFEEAMK,EAVPNIPFQMLLR,IHVLPIDDTVEGLTGNL,GNFDSLPVK,TDPHDVAR,TSWLDGK,SSILSNDMSSLK,LREYYDEQLGDDLPQAV,KVEATGSK,IVSQLLTLMDGLK,LLEPVVNMTDMLR,NAQSSSGGGSFNR,SLGYAYVNFQQPAAAER,FQGLQSTSGDEPLR,LVICDGSQEENEGLLK,IFHVNWFR,SAAPCVLFFDELDSIAK,ETQAQADQTSK,LMSLAEQAK,YGEYFPGTGDLR,IHVLPIDDTVEGLTGNLF,EGFQQPTVIQAQGWPV…	lcl|c222581_g2_i12|m.8452,lcl|c214164_g1_i8|m.3381,lcl|c222581_g2_i12|m.8451,lcl|c210253_g1_i2|m.2149,lcl|c229538_g7_i4|m.14373,lcl|c224182_g8_i1|m.9652,lcl|c242923_g2_i1|m.30393,lcl|c227548_g2_i4|m.12564,lcl|c236134_g1_i2|m.21741,lcl|c218852_g5_i3|m.5993,lcl|c241359_g3_i12|m.28482,lcl|c233948_g1_i2|m.19238,lcl|c223941_g1_i4|m.9486,lcl|c239893_g3_i1|m.26482,lcl|c241723_g2_i1|m.28896,lcl|c233495_g…	lcl|c222581_g2_i12|m.8452,lcl|c233833_g1_i4|m.19045,lcl|c222581_g2_i12|m.8451,lcl|c210253_g1_i2|m.2149,lcl|c229538_g7_i4|m.14373,lcl|c224182_g8_i1|m.9652,lcl|c242923_g2_i1|m.30393,lcl|c227548_g2_i4|m.12564,lcl|c233833_g1_i2|m.19042,lcl|c233521_g3_i3|m.18674,lcl|c236134_g1_i2|m.21741,lcl|c215199_g2_i2|m.3880,lcl|c218852_g5_i3|m.5993,lcl|c241359_g3_i12|m.28482,lcl|c233948_g1_i2|m.19238,lcl|c223941_…	O42587,Q6DIE2,O73885,O42227,Q8X1T3,P52434,Q5NVM9,Q32PJ8,Q5R7D3,Q4R6M5,Q7PX35,Q9N1U2,Q9M0V3,P23787,Q04870,Q92841,O49552,O15523,O88685,Q9Z2V4,Q8BH04,O00602,Q61656,Q0ZQK8,P62937,Q0ZQK7,P62938,Q0ZQK6,Q0P4P2,P18067,P35998,P29190,Q05944,Q6P6Z0,Q5R7R9,Q16531,Q4QQW4,Q0ZQL2,Q0ZQL1,Q0ZQL0,P41753,Q9XYZ5,B4JM29,Q94BQ2,Q3UYV9,O75351,B4Q034,Q04967,Q6S4N2,Q91291,Q5RAG0,P24629,P55063,Q9W6Y1,Q6GL04,P62940,P62941,…	O42587,O73885,O42227,Q8X1T3,P52434,Q5NVM9,Q32PJ8,Q5R7D3,Q4R6M5,Q9N1U2,Q9M0V3,P23787,Q69ZX6,Q92841,O49552,O15523,O88685,Q9Z2V4,Q8BH04,Q61656,Q0ZQK8,P62937,Q0ZQK7,P62938,Q0ZQK6,P18067,P59644,P35998,P29190,Q05944,Q6P6Z0,Q5R7R9,Q16531,Q4QQW4,Q0ZQL2,Q0ZQL1,Q0ZQL0,P41753,Q9XYZ5,Q94BQ2,O75351,Q04967,Q6S4N2,Q91291,Q5RAG0,P24629,Q8C5W4,P55063,Q9W6Y1,Q6GL04,P62940,P62941,Q6L4S0,P22202,P52873,Q5R658,P11928,…
GO:0097402	biological_process	neuroblast migration	1.2e-05	1	0	0	null	0.322	1	2.15e-05	1.1e-05	-0.97285	0.575	1	0.892	VIDINDNAPTIIPR		lcl|c243578_g4_i1|m.31087		Q8R508,Q8TDW7,Q14517,Q8BNA6,Q19319,Q9VW71,Q24292,B8V7Q1,Q2PZL6,E9PVD3,Q96JQ0,Q9H251,Q6V0I7,P33450,D4ACX8,P58365,Q5F226,Q9NYQ8,Q99PF4,O88277
GO:0098732	biological_process	macromolecule deacylation	0.000587	49	0.000501	41	-0.226937	0.457	1	0.000538	0.000461	-0.224389	0.457	1	0.892	KPSESPASK,NYTQNIDTLER,GSTSPVEEK,AVVVCDDR,VAEPPAVEVPGPAR,SASSSSNNATNSSRPK,YGEYFPGTGDLR,ECAPHFVAPNT,VPQSNESAAEPEKDIETK,KNNAQTAVQQVNEGL,SLIEEEIK,NGYNALGFSQGGQFFR,SVFLADINQEK,EMSDVNEWLK,IVQGETEK,MVANGVENYEDTK,SLINEIETIYDER,ALEEVEVSQK,QVEHEEDEDGISDENLK	KPSESPASK,AVVVCDDR,QGVDGTFR,SASSSSNNATNSSRPK,YGEYFPGTGDLR,VPQSNESAAEPEKDIETK,TYSSSEKDEK,KNNAQTAVQQVNEGL,NGYNALGFSQGGQFFR,SSILSNDMSSLK,EALDIQFK,GSTNWNSSSTRPK,MVANGVENYEDTK,TIRPDNMSEYTK,SLINEIETIYDER,ALEEVEVSQK,QVEHEEDEDGISDENLK,VAEPPAVEVP	lcl|c229870_g2_i10|m.14708,lcl|c232804_g4_i5|m.17788,lcl|c227266_g1_i1|m.12288,lcl|c223510_g3_i1|m.9178,lcl|c218214_g1_i1|m.5632,lcl|c152101_g1_i1|m.337,lcl|c229870_g2_i3|m.14711,lcl|c218214_g1_i1|m.5633,lcl|c240709_g1_i2|m.27632,lcl|c240709_g1_i1|m.27629,lcl|c218214_g1_i2|m.5634	lcl|c232804_g4_i5|m.17788,lcl|c223510_g3_i1|m.9178,lcl|c218214_g1_i1|m.5632,lcl|c152101_g1_i1|m.337,lcl|c218214_g1_i1|m.5633,lcl|c240709_g1_i2|m.27632,lcl|c218214_g1_i2|m.5634,lcl|c240709_g1_i1|m.27629	Q60520,Q92769,Q13547,P70288,O42227,Q62141,Q6AYU1,P56519,P56518,P56517,O75182,Q3MHR0,Q4R834,Q32PJ8,Q96ST3,Q8IXJ6,O09106,Q5RAG0,Q8HXW6,Q4QQW4,Q91695,Q94517,P23246	Q60520,Q92769,Q13547,P70288,O42227,Q62141,Q6AYU1,P56519,P56518,P56517,O75182,Q32PJ8,Q96ST3,O09106,Q5RAG0,Q8HXW6,Q4QQW4,Q91695,Q94517,P23246
GO:0050790	biological_process	regulation of catalytic activity	0.0797567	6660	0.0807968	6607	0.0186939	0.436	1	0.0717386	0.0725198	0.0156246	0.517	1	0.892	SILYVPK,DDTDAAPAWTK,FITEEAR,QTNTSQWEMPSDEAATKV,NSPAIIFIDEIDAIAPK,LDTECNAVAVAR,LFTDLREI,SDCVGGGR,IGSSGAPVTDQSEETR,ETMENQSIIGDFNK,DHDEPLAK,SEEDRITEAEKNER,EVAAFAQFGSDLDAATQSLLNR,LALADAGDTVEDANFVEK,LVDEPPPPLAPR,TLFPGNDHIDQLT,YGEYFPGTGDLR,TPLTSEQAFYAR,TFQDQGDTCR,IQILSNGDLK,MLDAEEMVNMAKPDER,VLNDVQDMK,EVENSPFVER,LVVLGSGGVGK,SGTVVQLR,EMVELPLR,VVTGQLQPNR,GVTIASGGVLPNIHPEL,ISEAHEELAK,FYLGGVPEGFNSK,TDTPQNAL…	SILYVPK,FITEEAR,LDTECNAVAVAR,IGSSGAPVTDQSEETR,DHDEPLAK,SEEDRITEAEKNER,KPQDTGGDNEIEY,EVAAFAQFGSDLDAATQSLLNR,LVDEPPPPLAPR,YGEYFPGTGDLR,TPLTSEQAFYAR,TFQDQGDTCR,LQNGRPVNVVSK,IQILSNGDLK,MLDAEEMVNMAKPDER,TIRPDNMSEYTK,VLNDVQDMK,EVENSPFVER,RLAELVK,LVVLGSGGVGK,SGTVVQLR,EMVELPLR,VVTGQLQPNR,GVTIASGGVLPNIHPEL,FYLGGVPEGFNSK,TDTPQNALPR,GQQSPSSSPSTTPPR,TLDEIQNLDADDESLV,FYEQFGK,EGAGMGGGGMEDILSHI,FAFQAEVSR,CCSNGC…	lcl|c230405_g2_i1|m.15255,lcl|c242947_g1_i3|m.30437,lcl|c232931_g1_i9|m.17924,lcl|c234626_g5_i8|m.20045,lcl|c232719_g2_i1|m.17712,lcl|c221676_g4_i8|m.7788,lcl|c214915_g6_i5|m.3736,lcl|c221676_g4_i4|m.7786,lcl|c243541_g3_i2|m.31058,lcl|c220971_g4_i2|m.7284,lcl|c238296_g3_i2|m.24349,lcl|c241650_g2_i3|m.28825,lcl|c209114_g1_i1|m.1902,lcl|c230102_g4_i1|m.14957,lcl|c232931_g1_i10|m.17922,lcl|c227771_g…	lcl|c230405_g2_i1|m.15255,lcl|c242947_g1_i3|m.30437,lcl|c232931_g1_i9|m.17924,lcl|c296217_g1_i1|m.32460,lcl|c221676_g4_i8|m.7788,lcl|c232719_g2_i1|m.17712,lcl|c230742_g3_i2|m.15573,lcl|c214915_g6_i5|m.3736,lcl|c221676_g4_i4|m.7786,lcl|c243541_g3_i2|m.31058,lcl|c224773_g5_i3|m.10121,lcl|c220971_g4_i2|m.7284,lcl|c238296_g3_i2|m.24349,lcl|c241650_g2_i3|m.28825,lcl|c230102_g4_i1|m.14957,lcl|c232931_g…	B1JJM7,P54614,Q9JJ19,P54613,P54612,P60051,Q5R7D3,A9N1J6,E7F9L8,Q9N1U2,Q9UKU0,O14786,Q8BYC6,P42861,Q96GG9,P05696,O15891,O35242,Q05046,P36179,Q8STF6,P39688,O00159,Q5R9I6,Q6DRG7,Q09639,Q4QQT4,Q5ZKU5,A1JRV9,P36181,P10809,P59083,Q31TX1,Q8R3G1,P54632,A4D1P6,Q05036,Q06124,Q9VFI9,P56812,Q0III9,O61998,P0A6T1,P0A6T2,Q21313,Q23979,Q23978,Q4QQW4,A7MPC2,P27446,P41753,P27463,P07858,B1XC24,P99999,P99998,P41988,…	B1JJM7,P54614,Q9JJ19,P54613,P54612,Q5R7D3,A9N1J6,E7F9L8,Q9N1U2,Q9DB30,Q9UKU0,O14786,Q8BYC6,P42861,Q96GG9,P05696,Q68FS3,O15891,Q05046,P36179,P39688,O00159,Q5R9I6,Q6DRG7,Q09639,Q4QQT4,Q5ZKU5,A1JRV9,P36181,P10809,P59083,Q31TX1,Q8R3G1,P54632,Q9Z136,Q05036,O55081,Q06124,Q9VFI9,P56812,Q0III9,O61998,P0A6T1,P0A6T2,Q21313,Q23979,Q23978,Q4QQW4,A7MPC2,P27446,P41753,P27463,P07858,B1XC24,P99999,P99998,P54646,…
GO:2000113	biological_process	negative regulation of cellular macromolecule biosynthetic process	0.0430518	3595	0.0442933	3622	0.0410155	0.217	1	0.0387287	0.0397608	0.0379415	0.254	1	0.819	SSGASVGETTNSEEINNADEGKIK,YNPTEVGR,SLPSSSASK,NSPAIIFIDEIDAIAPK,TQSEVDSQTAAQHAEIMEK,NKPTTQGDCSLETK,SGPGAGLAVLSEK,LLTGYPENEK,QVEHEEDEDGISDENLK,LMDEAMCSR,GADCDMVSAGTER,NAQSSSGGGSFNR,EPSEYDILHIQNQK,SEEDRITEAEKNER,FGIATSASSGDSTDAK,VSAIFATGSLLPTELDDR,YGEYFPGTGDLR,IQDKEGIPPDQQR,SGTPGSIQR,GVTIASGGVLPNIHPELLK,SLIFTETK,TPTADVLVFDYTK,APGAIGPYNQAVIADK,TAAFLIPILSR,YSMLIEDGVVK,TTLPNFK,VLNDVQDMK,YSQGGSYGSR,QEQVQ…	GVEICIATPGR,SSGASVGETTNSEEINNADEGKIK,SLPSSSASK,NKPTTQGDCSLETK,SGPGAGLAVLSEK,SSILSNDMSSLK,ENNMNEQELQPSR,LLTGYPENEK,QVEHEEDEDGISDENLK,ANSASSAMPIPSIPTPAIVTSPNASSPPSFI,LMDEAMCSR,NAQSSSGGGSFNR,EPSEYDILHIQNQK,SEEDRITEAEKNER,FGIATSASSGDSTDAK,VSAIFATGSLLPTELDDR,EQIDEIKTK,YGEYFPGTGDLR,IQDKEGIPPDQQR,IGDKIPSVEVMETTPTDKVNMS,GVTIASGGVLPNIHPELLK,TPTADVLVFDYTK,APGAIGPYNQAVIADK,TAAFLIPILSR,AIAELDTLKEDSYKDSTL,YSM…	lcl|c202129_g1_i1|m.1242,lcl|c232719_g2_i1|m.17712,lcl|c239497_g2_i4|m.25880,lcl|c224057_g7_i2|m.9572,lcl|c235619_g2_i6|m.21140,lcl|c228773_g1_i1|m.13638,lcl|c226786_g3_i2|m.11789,lcl|c238859_g1_i3|m.25019,lcl|c217834_g1_i3|m.5399,lcl|c225165_g2_i3|m.10416,lcl|c224848_g3_i1|m.10171,lcl|c229802_g6_i5|m.14639,lcl|c234785_g1_i10|m.20251,lcl|c232847_g6_i1|m.17834,lcl|c216545_g1_i1|m.4640,lcl|c234030_…	lcl|c202129_g1_i1|m.1242,lcl|c221676_g4_i8|m.7788,lcl|c232719_g2_i1|m.17712,lcl|c239497_g2_i4|m.25880,lcl|c224057_g7_i2|m.9572,lcl|c221676_g4_i4|m.7786,lcl|c224773_g5_i3|m.10121,lcl|c235619_g2_i6|m.21140,lcl|c228773_g1_i1|m.13638,lcl|c226786_g3_i2|m.11789,lcl|c238859_g1_i3|m.25019,lcl|c217834_g1_i3|m.5399,lcl|c227927_g4_i1|m.12894,lcl|c224848_g3_i1|m.10171,lcl|c228653_g2_i5|m.13498,lcl|c229802_g6…	O93377,Q0VCZ3,O93257,Q9SAF5,O73885,A3KP59,P15007,Q9TVM2,Q9SX33,Q5NVM9,Q5R7D3,Q6PDG5,Q32PJ8,Q9N1U2,Q3B8M3,Q4P184,Q91WV0,Q6IR75,Q54UW5,P05696,P30998,P98200,P51113,P98204,P10922,P39688,Q92841,Q0IIJ2,O15523,Q5XI68,P54632,Q9UI15,P49001,Q6P7L9,Q9W7I5,O60423,Q8IXJ6,Q9VVI3,P40429,Q5ZMV3,Q5ZL33,Q4QQW4,Q9DC33,P41877,Q6IQT4,P27446,Q9WUD9,P41753,Q3SWX8,O57391,Q16TA2,Q08773,Q09740,Q1LUA8,Q3MHL3,Q9LNQ4,O60675,…	O93377,Q0VCZ3,O93257,Q9SAF5,O73885,P15007,Q9TVM2,Q9SX33,Q5NVM9,Q5R7D3,Q6PDG5,Q32PJ8,Q9N1U2,Q3B8M3,Q9DB30,A5GFW1,P49138,Q4P184,Q54UW5,P05696,P30998,P98200,Q91757,P51113,P98204,P10922,Q3MHJ9,P18652,P39688,P18653,P18654,Q92841,Q0IIJ2,O15523,O61661,P0C605,P54632,Q9UI15,Q9Z136,P49001,O55081,Q6P7L9,Q9W7I5,O60423,Q5M824,Q9VVI3,P40429,Q5ZL33,Q4QQW4,Q9DC33,P41877,P27446,Q9WUD9,P41753,Q9NZI7,Q3SWX8,O57391,…
GO:2000112	biological_process	regulation of cellular macromolecule biosynthetic process	0.0897083	7491	0.0916439	7494	0.0307984	0.171	1	0.0806884	0.0822542	0.0277273	0.22	1	0.778	TGEDGDFLWPGFGENCR,YNPTEVGR,QTNTSQWEMPSDEAATKV,VQEEYIKDEQK,INDKEIEIPDDE,NSPAIIFIDEIDAIAPK,GNFDSLPVK,KVTESTSK,LVIEGKPITVY,NKPTTQGDCSLETK,VINDNFGIEEGLMTT,QVEHEEDEDGISDENLK,IGSSGAPVTDQSEETR,LMDEAMCSR,ASAIEALR,QYGNEDFLSELITK,NAQSSSGGGSFNR,SEEDRITEAEKNER,FGIATSASSGDSTDAK,TLFPGNDHIDQLT,YGEYFPGTGDLR,GDQAMFQR,QLENSNLDPR,SLIFTETK,VEQLTAENNELK,APGAIGPYNQAVIADK,IASESPEQTGICK,NYEAMEGEK,LAGPQLVQMFIGDGAK,VLNDVQ…	TGEDGDFLWPGFGENCR,KLIVLDPK,INDKEIEIPDDE,GNFDSLPVK,KVTESTSK,LVIEGKPITVY,NKPTTQGDCSLETK,VINDNFGIEEGLMTT,QVEHEEDEDGISDENLK,IGSSGAPVTDQSEETR,LMDEAMCSR,ASAIEALR,QYGNEDFLSELITK,NAQSSSGGGSFNR,TVETTTGNENLQK,LGSSQADVGLALGELYGNVFSQ,VSEGLDFADNNAR,SEEDRITEAEKNER,FGIATSASSGDSTDAK,IFHVNWFR,YGEYFPGTGDLR,GDQAMFQR,QLENSNLDPR,APGAIGPYNQAVIADK,IASESPEQTGICK,NYEAMEGEK,LAGPQLVQMFIGDGAK,TIRPDNMSEYTK,VLNDVQDMK,YSSTEAR,…	lcl|c230405_g2_i1|m.15255,lcl|c242947_g1_i3|m.30437,lcl|c232931_g1_i9|m.17924,lcl|c202129_g1_i1|m.1242,lcl|c221676_g4_i8|m.7788,lcl|c232719_g2_i1|m.17712,lcl|c234054_g3_i2|m.19385,lcl|c220164_g3_i1|m.6775,lcl|c239497_g2_i4|m.25880,lcl|c239246_g1_i11|m.25499,lcl|c220189_g1_i1|m.6796,lcl|c221676_g4_i4|m.7786,lcl|c235619_g2_i6|m.21140,lcl|c218494_g2_i5|m.5814,lcl|c228453_g2_i1|m.13340,lcl|c238859_g1…	lcl|c230405_g2_i1|m.15255,lcl|c242947_g1_i3|m.30437,lcl|c232931_g1_i9|m.17924,lcl|c202129_g1_i1|m.1242,lcl|c221676_g4_i8|m.7788,lcl|c232719_g2_i1|m.17712,lcl|c234054_g3_i2|m.19385,lcl|c220164_g3_i1|m.6775,lcl|c239497_g2_i4|m.25880,lcl|c239246_g1_i11|m.25499,lcl|c220189_g1_i1|m.6796,lcl|c221676_g4_i4|m.7786,lcl|c223887_g1_i1|m.9457,lcl|c224773_g5_i3|m.10121,lcl|c235619_g2_i6|m.21140,lcl|c218494_g2…	O93377,Q9Y265,Q9SAF5,B0RVI4,Q9N1U2,Q4P184,Q91WV0,Q5X728,O15891,Q80W31,P36179,P39688,Q5R9I6,E1BPK6,Q4QQT4,Q0IIJ2,P61158,P61157,P36181,P10809,Q9SF16,P49001,Q40079,Q40078,P62495,P62496,O60423,P62497,P61161,P62498,P61160,Q39097,Q750R1,Q5ZMV3,Q4QQW4,Q99JB2,P54409,P54408,Q08773,Q1LUA8,Q0E940,P13060,Q4ZXI0,A6M931,P41988,O73723,Q9EQS3,Q5SQX6,P54814,P54812,Q80W83,P54811,P52632,Q0IIG5,Q9TUG3,Q9V9J3,P16140,…	O93377,Q9Y265,Q9SAF5,B0RVI4,Q9N1U2,Q9DB30,Q4P184,Q5X728,O15891,P36179,P39688,Q5R9I6,E1BPK6,Q4QQT4,Q0IIJ2,P61158,P61157,P36181,P10809,Q9SF16,P49001,Q9Z136,O55081,Q40079,Q40078,P62495,P62496,O60423,P62497,P61161,P62498,P61160,Q39097,Q750R1,Q4QQW4,Q99JB2,P54409,P54408,Q08773,Q1LUA8,P13060,Q4ZXI0,A6M931,P41988,O73723,Q9EQS3,Q5SQX6,P54814,Q3YK19,P54812,Q80W83,P54811,P52632,Q9TUG3,Q9V9J3,P16140,Q6Y7W6,…
GO:2000111	biological_process	positive regulation of macrophage apoptotic process	5.99e-05	5	3.67e-05	3	-0.706745	0.498	1	6.46e-05	4.39e-05	-0.557813	0.547	1	0.892	VVTGQLQPNR,SGTPGSIQR	VVTGQLQPNR	lcl|c217198_g5_i5|m.5024	lcl|c217198_g5_i5|m.5024	A4UTP7	A4UTP7
GO:2000110	biological_process	negative regulation of macrophage apoptotic process	0	0	1.22e-05	1	null	0.312	1	1.08e-05	2.19e-05	1.02715	0.553	1	0.892		SPDDSSEAGSSTK		lcl|c217591_g3_i12|m.5271,lcl|c217591_g3_i2|m.5273		Q2KI76,Q9BQE4
GO:2000117	biological_process	negative regulation of cysteine-type endopeptidase activity	0.00849061	709	0.0082301	673	-0.0449584	0.561	1	0.00764666	0.00739684	-0.0479207	0.535	1	0.892	TFTTIETITNAK,DAWEISR,AIQPELEAPGPVTSHDSSTNGLI,VYQAGVGIATK,IGDKIPSVEVMETTPTDK,TPYPGMTNAETLAQVER,FLVLDEADR,NIITDETMK,IFEEGPPPLPDAR,SHYEETASK,IPSVEVMETTPTDKVNMSQLFAGK,TVIGGLTGSDPVSCSR,TAVEYIK,NILVGEGNVCK,AVDLELDATPF,GMTTSNNLLGK,GVLFAVPGAFTPGCSK,ESEYDQK,QLNPNTTVK,TAEEMSR,LLLPGNPSGTFLIR,AETETEFQEWMK,EVDEVVLVGGSTR,VTQPPPEDWSK,LIEDDEYNAHQGAK,DSETMPGNYSLSIR,IPSVEVMETTPTDKVNMS,LSKDDIDR,TTVSEENGDNSNNPAR,IPD…	WTAPEAALYQK,TFTTIETITNAK,IGDKIPSVEVMETTPTDK,FLVLDEADR,NIITDETMK,IFEEGPPPLPDAR,SHYEETASK,IPSVEVMETTPTDKVNMSQLFAGK,TVIGGLTGSDPVSCSR,GNKPIYVDGK,TAVEYIK,NILVGEGNVCK,AVDLELDATPF,GVLFAVPGAFTPGCSK,QLNPNTTVK,LLLPGNPSGTFLIR,AETETEFQEWMK,DIKPENL,VTQPPPEDWSK,LIEDDEYNAHQGAK,DSETMPGNYSLSIR,IPSVEVMETTPTDKVNMS,IGDKIPSVEVMETTPTDKVNMS,TTVSEENGDNSNNPAR,FAAYFQQGDMESNGK,QGPFDAVILPGGLGGTQNLAQSAK,QLQLEPDGTGLSCSLSNGLLG…	lcl|c244023_g1_i1|m.31634,lcl|c221840_g3_i5|m.7912,lcl|c221840_g3_i5|m.7911,lcl|c210724_g2_i3|m.2256,lcl|c229592_g3_i11|m.14442,lcl|c231881_g1_i2|m.16748,lcl|c210724_g2_i1|m.2253,lcl|c223941_g1_i4|m.9486,lcl|c226414_g3_i1|m.11460,lcl|c236924_g5_i3|m.22694,lcl|c236924_g5_i5|m.22695,lcl|c209114_g1_i1|m.1902,lcl|c229675_g2_i4|m.14522,lcl|c221840_g3_i2|m.7908,lcl|c223941_g1_i2|m.9485,lcl|c237286_g1_i…	lcl|c234064_g1_i4|m.19396,lcl|c234064_g1_i2|m.19394,lcl|c242662_g1_i1|m.30100,lcl|c221676_g4_i8|m.7788,lcl|c229592_g3_i11|m.14442,lcl|c225854_g1_i4|m.10994,lcl|c223941_g1_i4|m.9486,lcl|c221676_g4_i4|m.7786,lcl|c226414_g3_i1|m.11460,lcl|c236924_g5_i3|m.22694,lcl|c224773_g5_i3|m.10121,lcl|c236924_g5_i5|m.22695,lcl|c217583_g2_i1|m.5267,lcl|c227927_g4_i1|m.12894,lcl|c223941_g1_i2|m.9485,lcl|c237286_g…	Q15418,Q9N1E2,O73885,A5UCG6,B1JJM7,Q5NVM9,B8D894,Q5R7D3,P26819,Q4R6M5,A9N1J6,P26818,Q9N1U2,P26817,P42861,O97627,A7MSY9,P18652,P39688,P18653,P18654,Q09639,C0QL01,Q6LM51,Q92841,O15523,A1JRV9,A1AIK3,P08059,P0C605,Q31TX1,Q9WUT3,Q61656,B7NRZ0,Q83IN9,Q5PL07,P16444,Q87L81,B6I5N7,P0A6T1,P0A6T2,B5QYI4,Q05944,C1CWW2,B2VKB1,A7MPC2,P27446,Q9WUD9,P41753,Q6D022,Q9CNL2,P35626,B5R7S0,B1XC24,P51812,Q04967,Q6S4N2,…	Q15418,Q9N1E2,O73885,A5UCG6,B1JJM7,Q5NVM9,B8D894,Q5R7D3,P26819,Q4R6M5,A9N1J6,P26818,Q9N1U2,P26817,Q9DB30,A5GFW1,P49138,P42861,O97627,Q3MHJ9,A7MSY9,P18652,P39688,P18653,P18654,Q09639,C0QL01,Q6LM51,Q92841,O15523,O61661,A1JRV9,A1AIK3,P08059,P0C605,Q31TX1,Q9WUT3,Q61656,B7NRZ0,Q83IN9,Q5PL07,P16444,Q87L81,B6I5N7,P0A6T1,P0A6T2,B5QYI4,Q05944,C1CWW2,B2VKB1,A7MPC2,P27446,Q9WUD9,P41753,Q6D022,Q9CNL2,P35626,…
GO:0035158	biological_process	regulation of tube diameter, open tracheal system	0.0026346	220	0.00286158	234	0.119226	0.378	1	0.00238016	0.00257902	0.115764	0.391	1	0.892	VAEIPFNSTNKY,QDVYAEQLAAIPQFSK,DCSGDASESALMK,LIIVEGCQR,TGTLTQNR,ADIGVAMGIAGSDVSK,SAALQEAR,ITDSTMLQGIER,VILENAAVR,LPEDDSSVTCTFTNTLK,GSSEEKENLFGR,LIFDNLKK,SIAYTLTSNIPEISPFLMF,VATTPLVDDGSK,TVPLATTPMQDQVVKPGKPAIETPSAPTK,GVGIISEGTETKEDVAA,IANLASGLGSDK,TFNETPINPR,AIVVHGSQLK,LIFDNLK,YVELSEGSVK,QGAIVAVTGDGVNDSPALK,AAAPVAATR,GVGIISEGTETKEDVAAR,TGNESSVDR,GVGIISEGTETK,DPLNDKLVNER,NLVPQEAHV,QGAIVAVTGDGVNDSPAL…	VAEIPFNSTNKY,QDVYAEQLAAIPQFSK,DCSGDASESALMK,LIIVEGCQR,TGTLTQNR,ADIGVAMGIAGSDVSK,SAALQEAR,AEEILKR,VILENAAVR,LPEDDSSVTCTFTNTLK,GSSEEKENLFGR,QIIDYLGMQPCER,VATTPLVDDGSK,TVPLATTPMQDQVVKPGKPAIETPSAPTK,GVGIISEGTETKEDVAA,IANLASGLGSDK,TFNETPINPR,AIVVHGSQLK,LIFDNLK,YVELSEGSVK,KVAEIPFNSTNK,QGAIVAVTGDGVNDSPALK,AAAPVAATR,GVGIISEGTETKEDVAAR,TGNESSVDR,CSTIMINGEVLELDEK,GVGIISEGTETK,DPLNDKLVNER,NLVPQEAHV,QGAIVAVT…	lcl|c236239_g1_i2|m.21882,lcl|c213652_g3_i1|m.3162,lcl|c236239_g1_i8|m.21884,lcl|c217788_g4_i2|m.5364,lcl|c222950_g5_i5|m.8734,lcl|c222950_g5_i5|m.8735,lcl|c222950_g5_i7|m.8739,lcl|c236239_g1_i4|m.21883	lcl|c236239_g1_i2|m.21882,lcl|c213652_g3_i1|m.3162,lcl|c236239_g1_i8|m.21884,lcl|c217788_g4_i2|m.5364,lcl|c222950_g5_i5|m.8734,lcl|c222950_g5_i5|m.8735,lcl|c222950_g5_i7|m.8739,lcl|c236239_g1_i4|m.21883	Q9QZE5,Q9UBF2,Q6Z382,P27112,Q64541,Q64392,Q9I8E6,P09572,P24798,Q6PIE5,Q9YH26,Q5RDR3,P24797,P25489,P28774,Q5RCD8,Q64436,Q66JI9,Q9Y678,P30714,Q9TV52,Q9Z1W8,Q0WW26,P13637,P54707,Q8VDN2,Q29AE5,Q9QXK3,P20648,P54708,Q92126,Q9N0Z6,Q92123,P05023,P05024,P05025,P53620,Q54HL0,P09626,D2WKD8,P13607,Q13733,Q6PIC6,P50997,P58312,P19156,P35317,P50993,D4ABY2,P17326,P50996,Q92030,Q7PVF6,Q92036,P06685,Q9PUE4,P06687,…	Q9QZE5,Q9UBF2,Q6Z382,P27112,Q64541,Q64392,Q9I8E6,P09572,P24798,Q6PIE5,Q9YH26,Q5RDR3,P24797,P25489,P28774,Q5RCD8,Q64436,Q66JI9,Q9Y678,P30714,Q9TV52,Q9Z1W8,Q0WW26,P13637,P54707,Q8VDN2,Q29AE5,Q9QXK3,P20648,P54708,Q92126,Q9N0Z6,Q92123,P05023,P05024,P05025,P53620,Q54HL0,P09626,D2WKD8,P13607,Q13733,Q6PIC6,P50997,P58312,P19156,P35317,P50993,D4ABY2,P17326,P50996,Q92030,Q7PVF6,Q92036,P06685,Q9PUE4,P06687,…
GO:0048481	biological_process	plant ovule development	0.000275	23	0.000293	24	0.0916213	0.828	1	0.000258	0.000274	0.0860434	0.835	1	0.966	FLAIGLNDNTVR,TEVDDIPGALAPFQGR,QQEIVISR,IVILEYIPSK,LGAVFNQVATPLR,LAASTTDEVDEDPTGTK,TVLDMVTGDLSDTR,LASSTTDEIDEDPTGTK,DYVVVGSDSGR,VFPLLAMEMFGVIR	FLAIGLNDNTVR,NFGDQPDIR,LVYILNR,QQEIVISR,IVILEYIPSK,LGAVFNQVATPLR,LAASTTDEVDEDPTGTK,TVLDMVTGDLSDTR,LASSTTDEIDEDPTGTK,DLTLNPR	lcl|c237732_g2_i1|m.23668,lcl|c237732_g2_i7|m.23678,lcl|c237732_g2_i2|m.23675,lcl|c237732_g2_i12|m.23671	lcl|c237732_g2_i1|m.23668,lcl|c237732_g2_i7|m.23678,lcl|c237732_g2_i2|m.23675,lcl|c237732_g2_i12|m.23671	A0JN52,Q54SA7,Q9UTT2,P0DKL4,Q52E49,P0CR22,Q5RBI5,Q7RYR4,Q9W0M7,Q5B1X8,Q6BYK1,Q1LVE8,P0CR23,P0DKL6,Q4PGM6,Q4WLI5,Q15393,Q5A7S5,Q921M3	A0JN52,Q54SA7,Q9UTT2,P0DKL4,Q52E49,P0CR22,Q5RBI5,Q7RYR4,Q9W0M7,Q5B1X8,Q6BYK1,Q1LVE8,P0CR23,P0DKL6,Q4PGM6,Q4WLI5,Q15393,Q5A7S5,Q921M3
GO:2000116	biological_process	regulation of cysteine-type endopeptidase activity	0.0152208	1271	0.0153841	1258	0.0153886	0.787	1	0.0136994	0.0138169	0.0123293	0.829	1	0.965	LAERTEELEK,LAGESESNLR,GVGNPAPEINWIK,LVQDVANNTNEEAGDGTTTATVLAR,IGDKIPSVEVMETTPTDK,IFEEGPPPLPDAR,GYISPYFINTTK,NSPAIIFIDEIDAIAPK,IHVLPIDDTVEGLTGNL,GIGDLISSAMK,AVDLELDATPF,NSLQDMAIVTGGMV,AAVEEGIVPGGGVAL,DETQTAEDKKEN,QLNPNTTVK,TAEEMSR,IVSQLLTLMDGLK,TVEVLEPEVR,CFTIASVK,AETETEFQEWMK,EVDEVVLVGGSTR,LIEDDEYNAHQGAK,VGLQVAAVK,TVGNEDLLSFVTK,QCEQLMAENDELKK,MDLIDLEDEQIDAEVLDSLA,AQAQLEKDETQTAEDK,DEDELNQELMEL,VAS…	TKLDLAALK,LAERTEELEK,LAGESESNLR,QANPDPTAVAEK,GVGNPAPEINWIK,LVQDVANNTNEEAGDGTTTATVLAR,IGDKIPSVEVMETTPTDK,VLNDQIFAVLNK,IFEEGPPPLPDAR,GYISPYFINTTK,GNKPIYVDGK,IHVLPIDDTVEGLTGNL,GIGDLISSAMK,AVDLELDATPF,NSLQDMAIVTGGMV,AAVEEGIVPGGGVAL,DETQTAEDKKEN,QLNPNTTVK,IVSQLLTLMDGLK,DAENVYNQVINLDPR,DQSEAIGK,CFTIASVK,AETETEFQEWMK,DIKPENL,LIEDDEYNAHQGAK,VGLQVAAVK,SIEEAGGEPEKAPKDEDELNQELMEL,IHVLPIDDTVEGLTGNLF,TVGNEDLL…	lcl|c230405_g2_i1|m.15255,lcl|c229538_g7_i4|m.14373,lcl|c220963_g1_i2|m.7277,lcl|c236195_g4_i1|m.21828,lcl|c220963_g1_i1|m.7276,lcl|c240346_g7_i3|m.27102,lcl|c240630_g1_i1|m.27515,lcl|c229592_g3_i11|m.14442,lcl|c244197_g2_i1|m.31877,lcl|c229025_g3_i1|m.13888,lcl|c210230_g1_i1|m.2146,lcl|c223941_g1_i4|m.9486,lcl|c226414_g3_i1|m.11460,lcl|c236924_g5_i3|m.22694,lcl|c230405_g2_i9|m.15259,lcl|c236924_…	lcl|c230405_g2_i1|m.15255,lcl|c234064_g1_i2|m.19394,lcl|c240346_g7_i3|m.27102,lcl|c240630_g1_i1|m.27515,lcl|c221676_g4_i8|m.7788,lcl|c229592_g3_i11|m.14442,lcl|c244197_g2_i1|m.31877,lcl|c229025_g3_i1|m.13888,lcl|c235627_g4_i6|m.21153,lcl|c221676_g4_i4|m.7786,lcl|c226414_g3_i1|m.11460,lcl|c230405_g2_i9|m.15259,lcl|c224773_g5_i3|m.10121,lcl|c236924_g5_i5|m.22695,lcl|c217583_g2_i1|m.5267,lcl|c243758…	Q15418,Q9N1E2,O73885,A5UCG6,B1JJM7,Q90YM8,Q5NVM9,B8D894,Q5R7D3,P26819,Q7TMB8,Q4R6M5,A9N1J6,P26818,Q9N1U2,P26817,P23787,Q5NVM5,P42861,P84817,O97627,P50140,Q05046,A7MSY9,P18652,P39688,P18653,P18654,Q9VF87,Q09639,C0QL01,Q6LM51,Q92841,O15523,A1JRV9,A1AIK3,P08059,P10809,P0C605,Q31TX1,Q9WUT3,Q61656,B7NRZ0,P29197,Q83IN9,P56812,Q5PL07,P16444,O00291,Q87L81,B6I5N7,P0A6T1,P0A6T2,B5QYI4,Q05944,C1CWW2,B2VKB1,…	O73885,A5UCG6,B1JJM7,Q5NVM9,B8D894,Q5R7D3,A9N1J6,Q9N1U2,Q9DB30,A5GFW1,P49138,Q5NVM5,P42861,O97627,Q3MHJ9,P50140,Q05046,P18652,P39688,P18653,P18654,Q09639,Q92841,O15523,O61661,A1JRV9,P10809,P0C605,Q31TX1,Q83IN9,P56812,Q5PL07,P16444,O00291,P0A6T1,P0A6T2,B5QYI4,A7MPC2,P27446,Q9WUD9,P41753,Q9CNL2,B1XC24,P99999,P99998,Q7L576,P54646,Q6GL04,Q299G2,O02649,P25098,P32865,B8FK51,Q7VNR9,Q0SXP3,P11801,Q5SQX6,…
GO:0035159	biological_process	regulation of tube length, open tracheal system	0.00789184	659	0.00847468	693	0.102798	0.188	1	0.00710816	0.00761633	0.0996193	0.202	1	0.748	LAELEEFISGPNHAQIQQVGDR,TPQTIQR,VAEIPFNSTNKY,NNRPSEGPLQTR,IVLENSVFSDHR,SAALQEAR,ITDSTMLQGIER,VVGAMQLYSTER,VILENAAVR,LPEDDSSVTCTFTNTLK,GSSEEKENLFGR,ISGDTIFVTAPHEPTDGIIGVNR,LLYNNVSNFAK,SIAYTLTSNIPEISPFLMF,EGNYEDVVR,VATTPLVDDGSK,IYIDANNNPER,TFNETPINPR,LIFDNLK,AFMTADLPNELIELLEK,GVGIISEGTETKEDVAAR,LASTLVHLGEYQAAVDGAR,LHVIEVGTPPAGNQPF,GVGIISEGTETK,EAIDSYIK,TLQIFNIEMK,DPLNDKLVNER,NLVPQEAHV,QGAIVAVTGDGVND…	LAELEEFISGPNHAQIQQVGDR,TPQTIQR,VAEIPFNSTNKY,SAALQEAR,VVGAMQLYSTER,KVSQPIEGHAA,VILENAAVR,LPEDDSSVTCTFTNTLK,GSSEEKENLFGR,QLIDQVVQTALSETQDPEDVSCTVK,ISGDTIFVTAPHEPTDGIIGVNR,LLYNNVSNFAK,KDQEESKQDQPIV,EGNYEDVVR,QIIDYLGMQPCER,VATTPLVDDGSK,IYIDANNNPER,FQQVPSQQGQTSPLLQ,IHDGSEEPATHNALAK,TFNETPINPR,LIFDNLK,AFMTADLPNELIELLEK,GVGIISEGTETKEDVAAR,LASTLVHLGEYQAAVDGAR,KVSQPIEGHAAA,GVGIISEGTETK,EAIDSYIK,TLQIFNIEMK…	lcl|c236239_g1_i2|m.21882,lcl|c213652_g3_i1|m.3162,lcl|c236239_g1_i8|m.21884,lcl|c217788_g4_i2|m.5364,lcl|c222950_g5_i5|m.8734,lcl|c222950_g5_i5|m.8735,lcl|c243578_g4_i1|m.31087,lcl|c217447_g9_i5|m.5205,lcl|c222950_g5_i7|m.8739,lcl|c236239_g1_i4|m.21883	lcl|c236239_g1_i2|m.21882,lcl|c244324_g2_i1|m.32048,lcl|c213652_g3_i1|m.3162,lcl|c236239_g1_i8|m.21884,lcl|c217788_g4_i2|m.5364,lcl|c222950_g5_i5|m.8734,lcl|c222950_g5_i5|m.8735,lcl|c217447_g9_i5|m.5205,lcl|c222950_g5_i7|m.8739,lcl|c236239_g1_i4|m.21883	Q9QZE5,Q6Z382,P27112,Q64541,P11442,Q64392,Q9YH26,Q5RCD8,Q64436,Q66JI9,Q9Y678,Q9TV52,P13637,Q8VDN2,Q29AE5,Q9QXK3,Q9N0Z6,Q0WLB5,P09626,D2WKD8,P13607,Q2RBN7,P58312,P19156,B8V7Q1,D4ABY2,Q92030,Q7PVF6,Q92036,Q99PF4,O88277,P53675,Q14517,Q4AEF8,Q2PZL6,A2VE21,Q08DA1,Q22498,Q9H251,P33450,P18907,P04074,Q8H852,Q2QYW2,Q10161,Q8R508,Q9UBF2,Q8BNA6,Q24292,E9PVD3,Q9I8E6,P09572,P24798,Q6PIE5,Q9NYQ8,P22137,Q5RDR3,…	Q9QZE5,Q6Z382,P27112,Q64541,P11442,Q6V1P9,Q64392,Q9YH26,Q5RCD8,Q64436,Q66JI9,Q9Y678,Q9TV52,P13637,Q8VDN2,Q29AE5,Q9QXK3,Q9N0Z6,Q0WLB5,P09626,D2WKD8,P13607,Q2RBN7,P58312,P19156,B8V7Q1,D4ABY2,Q92030,Q7PVF6,Q92036,Q99PF4,O88277,P53675,Q14517,Q4AEF8,Q2PZL6,A2VE21,Q08DA1,Q22498,Q9H251,P33450,P18907,P04074,Q8H852,Q2QYW2,Q10161,Q8R508,Q9UBF2,Q8BNA6,Q24292,E9PVD3,Q9I8E6,P09572,P24798,Q6PIE5,Q9NYQ8,P22137,…
GO:0098739	biological_process	import across plasma membrane	0.00261065	218	0.00278821	228	0.0949264	0.487	1	0.00235862	0.00251317	0.0915664	0.501	1	0.892	VAEIPFNSTNKY,DCSGDASESALMK,LIIVEGCQR,TGTLTQNR,ADIGVAMGIAGSDVSK,GIAGSDVSK,VLISPGSDTVPAGLEIAAR,GSSEEKENLFGR,DFFINDIFNGK,LIFDNLKK,SIAYTLTSNIPEISPFLMF,VATTPLVDDGSK,GINLSGGQK,GVGIISEGTETKEDVAA,IANLASGLGSDK,AIVVHGSQLK,LIFDNLK,YVELSEGSVK,QGAIVAVTGDGVNDSPALK,SLGIGEASSEGDEHTYGHK,GVGIISEGTETKEDVAAR,TIGDFLTK,GVGIISEGTETK,DPLNDKLVNER,NLVPQEAHV,MQNGVTNGDSK,QGAIVAVTGDGVNDSPALKR,VIMVTGDHPITAK,LNIPVEEVDPR,NLVPQE…	VAEIPFNSTNKY,DCSGDASESALMK,LIIVEGCQR,TGTLTQNR,ADIGVAMGIAGSDVSK,AEEILKR,GIAGSDVSK,VLISPGSDTVPAGLEIAAR,GSSEEKENLFGR,TLDAFLDLVR,DFFINDIFNGK,VATTPLVDDGSK,GINLSGGQK,GVGIISEGTETKEDVAA,IANLASGLGSDK,AIVVHGSQLK,LIFDNLK,YVELSEGSVK,KVAEIPFNSTNK,QGAIVAVTGDGVNDSPALK,SLGIGEASSEGDEHTYGHK,GVGIISEGTETKEDVAAR,CSTIMINGEVLELDEK,GVGIISEGTETK,GLDSLLDLLR,AGLVDSDIAESKPNQEAPMNQPTVR,DPLNDKLVNER,NLVPQEAHV,IVLATER,QGAIVAVTG…	lcl|c232301_g1_i1|m.17238,lcl|c240942_g2_i1|m.27973,lcl|c232301_g1_i2|m.17239,lcl|c222950_g5_i5|m.8734,lcl|c222950_g5_i5|m.8735,lcl|c222950_g5_i7|m.8739,lcl|c236422_g1_i1|m.22090,lcl|c226071_g2_i11|m.11178,lcl|c236422_g1_i5|m.22097,lcl|c234322_g7_i1|m.19718,lcl|c240942_g2_i8|m.27977,lcl|c213652_g3_i1|m.3162,lcl|c236422_g1_i6|m.22099,lcl|c226071_g2_i7|m.11182,lcl|c217788_g4_i2|m.5364,lcl|c240942_g…	lcl|c232301_g1_i1|m.17238,lcl|c240942_g2_i1|m.27973,lcl|c232301_g1_i2|m.17239,lcl|c229784_g1_i1|m.14625,lcl|c222950_g5_i5|m.8734,lcl|c222950_g5_i5|m.8735,lcl|c222950_g5_i7|m.8739,lcl|c226071_g2_i11|m.11178,lcl|c233719_g1_i10|m.18891,lcl|c234322_g7_i1|m.19718,lcl|c240942_g2_i8|m.27977,lcl|c240809_g1_i1|m.27759,lcl|c213652_g3_i1|m.3162,lcl|c226071_g2_i7|m.11182,lcl|c217788_g4_i2|m.5364,lcl|c240942_…	Q7FB56,Q75N73,P27112,Q7GB25,A7KVC2,Q54JR2,Q64541,P32386,Q54LE6,Q28689,Q8VZZ4,Q64392,Q54V86,Q9YH26,Q8T6H3,Q5RCD8,Q64436,Q9TV52,P13637,Q9R1S7,Q8VDN2,Q8T6H8,Q9QYM0,Q9N0Z6,O88563,Q9LZJ5,P09626,D2WKD8,P13607,P58312,O60706,P19156,Q92030,Q92036,Q6Y306,O15431,P38735,Q5T3U5,Q5F364,Q08DA1,Q63563,Q54VJ0,O35379,Q42093,O88269,P18907,P04074,Q9C8H1,Q80WJ6,Q9C8H0,P43006,Q10RX7,O15440,Q8VI47,Q864R9,B2RX12,A0A0D1C…	Q7FB56,P27112,Q75N73,Q7GB25,A7KVC2,Q54JR2,Q64541,P32386,Q54LE6,Q28689,Q8VZZ4,Q64392,Q54V86,Q9YH26,Q8T6H3,Q5RCD8,Q64436,Q9TV52,P13637,Q9R1S7,Q8VDN2,Q8T6H8,Q9QYM0,O57321,Q9N0Z6,O88563,Q9LZJ5,P09626,D2WKD8,P13607,P58312,O60706,P19156,Q92030,Q92036,Q6Y306,O15431,P38735,Q5T3U5,Q5F364,Q08DA1,Q63563,Q54VJ0,O35379,Q42093,O88269,P18907,P04074,Q9C8H1,Q80WJ6,Q9C8H0,P43006,Q10RX7,Q9Y345,O15440,Q8VI47,Q864R9,…
GO:2000114	biological_process	regulation of establishment of cell polarity	8.38e-05	7	0.00011	9	0.392791	0.588	1	8.62e-05	0.00011	0.349078	0.609	1	0.908	LQTALEEINALNK,AAAEKEQNDGTR,GALNDGGAGENNSELHK,AVNSDLLETR,KVTEATQK	LQTALEEINALNK,LQLAEEHIESLEQQLAESEK,AAAEKEQNDGTR,KCISETTSKDER,KVTEATQK	lcl|c221194_g2_i1|m.7463	lcl|c221194_g2_i1|m.7463	Q6P0R8	Q6P0R8
GO:0050798	biological_process	activated T cell proliferation	0.000455	38	0.000281	23	-0.694145	0.0659	1	0.00042	0.000263	-0.67329	0.0694	1	0.437	DAWEISR,TPYPGMTNAETLAQVER,ATEEQQGTQSVR,LIEDDEYNAHQGAK,LDNGGFYITTR,DSETMPGNYSLSIR,LLLPGNPSGTFLIR,VADFGLAR,VADFGLSR,NILVGEGNVCK	WTAPEAALYQK,ATEEQQGTQSVR,LIEDDEYNAHQGAK,LDNGGFYITTR,DSETMPGNYSLSIR,LLLPGNPSGTFLIR,VADFGLAR,VADFGLSR,NILVGEGNVCK	lcl|c242947_g1_i3|m.30437,lcl|c225457_g2_i2|m.10643,lcl|c244023_g1_i1|m.31634,lcl|c210724_g2_i1|m.2253,lcl|c216545_g1_i1|m.4640,lcl|c210724_g2_i3|m.2256	lcl|c242947_g1_i3|m.30437,lcl|c225457_g2_i2|m.10643,lcl|c244023_g1_i1|m.31634,lcl|c210724_g2_i1|m.2253,lcl|c216545_g1_i1|m.4640,lcl|c210724_g2_i3|m.2256	P10936,Q62844,P07947,P13406,P18461,A1Y2K1,P12931,Q02977,P15054,P14084,Q9V9J3,P00523,P06241,Q91147,P00521,P00522,P42684,P00520,P27446,Q9WUD9,F1RDG9,P28693,P10447,P13116,P13115,P39688,A1A5H8,Q4JIM5,P00519,A0JNB0,P17713,Q6EWH2,Q8JH64,P05480,P09324	P10936,Q62844,P07947,P13406,P18461,A1Y2K1,P12931,Q02977,P15054,P14084,Q9V9J3,P00523,P06241,Q91147,P00521,P00522,P42684,P00520,P27446,Q9WUD9,F1RDG9,P28693,P10447,P13116,P13115,P39688,A1A5H8,Q4JIM5,P00519,A0JNB0,P17713,Q6EWH2,Q8JH64,P05480,P09324
GO:0061441	biological_process	renal artery morphogenesis	0.000431	36	0.000416	34	-0.0522414	0.88	1	0.000398	0.000384	-0.0530206	0.876	1	0.985	TTQSVIVTGR,SDSSVQGTGFR,NDNGGFNR,IWNNNYGFYR	TTQSVIVTGR,SDSSVQGTGFR,NDNGGFNR,IWNNNYGFYR	lcl|c214211_g3_i3|m.3396	lcl|c214211_g3_i3|m.3396	O14786	O14786
GO:0036486	biological_process	ventral trunk neural crest cell migration	0.000443	37	0.00044	36	-0.00930763	0.978	1	0.000409	0.000406	-0.0113244	0.973	1	0.992	LLEIENEIK,TTQSVIVTGR,SDSSVQGTGFR,NDNGGFNR,IWNNNYGFYR	TTQSVIVTGR,SDSSVQGTGFR,NDNGGFNR,IWNNNYGFYR,KTEVAAENK,SKENTNVAAK	lcl|c238843_g5_i10|m.24992,lcl|c214211_g3_i3|m.3396	lcl|c238843_g5_i10|m.24992,lcl|c214211_g3_i3|m.3396	O60462,O14786	O60462,O14786
GO:0060113	biological_process	inner ear receptor cell differentiation	0.00223941	187	0.00207893	170	-0.107283	0.482	1	0.00202475	0.00187665	-0.109587	0.472	1	0.892	IADFGLAR,MLQMADK,EVVAGNSK,HSYSEAER,MINLSVPDTIDER,VIDINDNAPTIIPR,ITPPEMFVDTHPMR,NWMNSIGVSPYVNNLYR,LLMEGETINDLMALSPEEILLR,AYTLALLSK,EQLDVSGGTSESSAEGTK,FSAGSEFK,IANFKDPSIATSQAV,VYLPINAATSDVFEK,EAFDQFDLDR,IAFVDWINSALKDDAEAR	IADFGLAR,MLQMADK,EVVAGNSK,HSYSEAER,MINLSVPDTIDER,IANFKDPSIATSQAVLDLVDAIKPGVV,TMADKDIVDWVNNK,ITPPEMFVDTHPMR,NWMNSIGVSPYVNNLYR,LLMEGETINDLMALSPEEILLR,AYTLALLSK,VVASDQGQNR,DPSIATSQAVLDLVDAIKPGVV,EQLDVSGGTSESSAEGTK,SIGCNIVNIGAEDLEK,FSAGSEFK,VYLPINAATSDVFEK,IAFVDWINSALKDDAEAR	lcl|c226782_g6_i6|m.11785,lcl|c235052_g1_i3|m.20523,lcl|c221061_g4_i1|m.7355,lcl|c235052_g1_i4|m.20524,lcl|c222555_g2_i4|m.8428,lcl|c226176_g1_i2|m.11271,lcl|c221061_g4_i2|m.7358,lcl|c235052_g1_i6|m.20525,lcl|c232719_g2_i1|m.17712,lcl|c226782_g6_i4|m.11783,lcl|c213237_g2_i2|m.2995,lcl|c226782_g6_i5|m.11784,lcl|c221431_g3_i2|m.7619,lcl|c233141_g1_i1|m.18196,lcl|c213203_g1_i1|m.2991,lcl|c234378_g4_…	lcl|c226782_g6_i6|m.11785,lcl|c235052_g1_i3|m.20523,lcl|c221061_g4_i1|m.7355,lcl|c235052_g1_i4|m.20524,lcl|c222555_g2_i4|m.8428,lcl|c226176_g1_i2|m.11271,lcl|c221061_g4_i2|m.7358,lcl|c235052_g1_i6|m.20525,lcl|c232719_g2_i1|m.17712,lcl|c226782_g6_i4|m.11783,lcl|c213237_g2_i2|m.2995,lcl|c226782_g6_i5|m.11784,lcl|c221431_g3_i2|m.7619,lcl|c244324_g2_i1|m.32048,lcl|c233141_g1_i1|m.18196,lcl|c213203_g1…	Q8R508,O64771,Q8BNA6,Q24292,Q3UMM4,O88818,Q61233,E9PVD3,Q9NYQ8,P20794,Q99K51,Q7T6X2,P13796,P13797,Q96JQ0,Q5F226,Q6FN53,A7E3Q8,P27636,Q61851,Q8TDW7,Q3V0K9,P18460,A6H742,Q19319,B8V7Q1,Q63598,Q00535,Q5ZKN1,Q00534,P58365,P43450,Q8N165,P54680,Q6NU47,O22042,Q99PF4,Q6P698,O88277,Q14517,A8WIP6,Q9VW71,Q2PZL6,Q9H251,Q6V0I7,P33450,P22607,D4ACX8,P08630,Q6P3Q4	Q8R508,O64771,Q8BNA6,Q24292,Q3UMM4,O88818,Q61233,E9PVD3,Q6V1P9,Q9NYQ8,P20794,Q99K51,Q7T6X2,P13796,P13797,Q96JQ0,Q5F226,Q6FN53,A7E3Q8,P27636,Q61851,Q8TDW7,Q3V0K9,P18460,A6H742,B8V7Q1,Q63598,Q00535,Q5ZKN1,Q00534,P58365,P43450,Q8N165,P54680,Q6NU47,O22042,Q99PF4,Q6P698,O88277,Q14517,A8WIP6,Q9VW71,Q2PZL6,Q9H251,Q6V0I7,P33450,P22607,D4ACX8,P08630,Q6P3Q4
GO:1902563	biological_process	regulation of neutrophil activation	0.000192	16	0.000208	17	0.117684	0.815	1	0.000183	0.000198	0.109612	0.822	1	0.962	VMCQESQTCCEVSAGK,SECPADSSCCK,ESQCQEDQTCCK,LASGEYGCCPLPHAVCCSDK,CDLSAQTCTT,LSSGSWGCCPLR	LSSGSWGCCPLRK,VMCQESQTCCEVSAGK,ESECPDSNTCCK,SECPADSSCCK,CDLSAQTCTT,LSSGSWGCCPLR,SIICPDRESECPDSNTCCK	lcl|c226332_g1_i2|m.11417	lcl|c226332_g1_i2|m.11417	P23785	P23785
GO:1903894	biological_process	regulation of IRE1-mediated unfolded protein response	4.79e-05	4	4.89e-05	4	0.0302207	0.976	1	5.38e-05	5.49e-05	0.0271497	0.976	1	0.992	ALISSAATSALR,EIEPEEEELAVVR,GEQSGEMNTSSVTARPDA,GDDQENAEQNSTADAK	LLFAELR,EIEPEEEELAVVR,GDDQENAEQNSTADAK	lcl|c210230_g1_i1|m.2146,lcl|c222730_g7_i1|m.8585,lcl|c213844_g3_i2|m.3224	lcl|c210230_g1_i1|m.2146,lcl|c222730_g7_i1|m.8585,lcl|c213844_g3_i2|m.3224	Q16611,P18031,Q9Z142,O08734	Q16611,P18031,Q9Z142,O08734
GO:0035150	biological_process	regulation of tube size	0.0104187	870	0.0111161	909	0.0934856	0.169	1	0.00938062	0.00998683	0.0903435	0.184	1	0.721	SAALQEAR,ITDSTMLQGIER,LPEDDSSVTCTFTNTLK,ISGDTIFVTAPHEPTDGIIGVNR,LLYNNVSNFAK,QIAVALCEAISPTGV,EGNYEDVVR,TFNETPINPR,AANVLFVDNPVGAGYSYVTDVR,TLQIFNIEMK,AETETEFQEWMK,EVDEVVLVGGSTR,QGAIVAVTGDGVNDSPALKR,GQFSTDDLVEEVEKR,ADDPSTYTEVVEAANR,LDWDGLADFLK,EQVMETVK,AANVLFVDNPVGAGYSY,TLGVGGFGR,EYIVPVNNR,NTGAFYK,DQEESKQDQPIV,IAAYLYK,LGGTLMSNWPR,LLLPWLEAK,FLQMAQK,LIIVEGCQR,CNEAAVWSLLAK,LLDSMGYK,LWEEVLNETNQ,VMEYITR,L…	SAALQEAR,LPEDDSSVTCTFTNTLK,ISGDTIFVTAPHEPTDGIIGVNR,LLYNNVSNFAK,QLIDQVVQTALSETQDPEDVSCTVK,EGNYEDVVR,QIIDYLGMQPCER,FQQVPSQQGQTSPLLQ,TFNETPINPR,IHDGSEEPATHNALAK,AANVLFVDNPVGAGYSYVTDVR,TLQIFNIEMK,YNCQVTDTR,AETETEFQEWMK,DIKPENL,QGAIVAVTGDGVNDSPALKR,GQFSTDDLVEEVEKR,ADDPSTYTEVVEAANR,LDWDGLADFLK,EQVMETVK,NNLAGAEELFV,AANVLFVDNPVGAGYSY,AAEQAHLWSELV,TLGVGGFGR,EYIVPVNNR,AESDIMKR,DQEESKQDQPIV,IAAYLYK,LGGTLMSN…	lcl|c236239_g1_i2|m.21882,lcl|c236181_g1_i10|m.21802,lcl|c231968_g5_i8|m.16847,lcl|c231968_g5_i3|m.16844,lcl|c208387_g1_i1|m.1778,lcl|c236239_g1_i4|m.21883,lcl|c237490_g5_i6|m.23318,lcl|c223266_g1_i3|m.8987,lcl|c224029_g4_i2|m.9565,lcl|c231881_g1_i2|m.16748,lcl|c229534_g2_i1|m.14362,lcl|c236181_g1_i2|m.21806,lcl|c224029_g4_i1|m.9563,lcl|c243578_g4_i1|m.31087,lcl|c223608_g1_i1|m.9238,lcl|c229534_g…	lcl|c234064_g1_i4|m.19396,lcl|c236239_g1_i2|m.21882,lcl|c234064_g1_i2|m.19394,lcl|c242662_g1_i1|m.30100,lcl|c221676_g4_i8|m.7788,lcl|c236239_g1_i4|m.21883,lcl|c224029_g4_i2|m.9565,lcl|c225854_g1_i4|m.10994,lcl|c221676_g4_i4|m.7786,lcl|c236181_g1_i2|m.21806,lcl|c217096_g5_i1|m.4965,lcl|c224029_g4_i1|m.9563,lcl|c239210_g2_i1|m.25440,lcl|c224773_g5_i3|m.10121,lcl|c217583_g2_i1|m.5267,lcl|c220106_g1_…	Q6Z382,P27112,Q15418,O73885,P11442,Q5NVM9,Q5R7D3,P26819,Q64392,P26818,Q9N1U2,P26817,Q8CIQ7,Q9YH26,O97627,P13637,Q92608,P18652,Q8VDN2,Q29AE5,P18653,B4NAL6,P18654,B4QZU1,Q09639,Q9QXK3,P0C605,Q9WUT3,P13607,B4JXX2,Q2RBN7,P59764,P58312,P19156,Q9VFI9,B8V7Q1,D4ABY2,Q92030,Q05944,Q92036,P41753,P53675,P35626,P51812,Q08DA1,Q04967,Q6S4N2,Q91291,Q9H251,P33450,P24629,P55063,Q9W6Y1,P22202,Q8R508,P25098,P32865,…	Q6Z382,P27112,Q15418,O73885,P11442,Q5NVM9,Q6V1P9,Q5R7D3,P26819,Q64392,P26818,Q9N1U2,P26817,Q9DB30,A5GFW1,P49138,Q8CIQ7,Q9YH26,O97627,P13637,Q92608,Q3MHJ9,P18652,Q8VDN2,Q29AE5,P18653,P18654,B4NAL6,B4QZU1,Q09639,Q9QXK3,O61661,P0C605,Q9WUT3,B4JXX2,Q2RBN7,P13607,P59764,P58312,P19156,Q9VFI9,B8V7Q1,D4ABY2,Q92030,Q05944,Q5M824,Q92036,P41753,P53675,P35626,P51812,P11798,Q08DA1,P54646,Q04967,Q6S4N2,Q91291,…
GO:0036481	biological_process	intrinsic apoptotic signaling pathway in response to hydrogen peroxide	1.2e-05	1	1.22e-05	1	0.0302207	0.988	1	2.15e-05	2.19e-05	0.0271497	0.985	1	0.992	ELEPTFDAEVVEK	EIPGVTQQIVGEILK	lcl|c217312_g3_i2|m.5103,lcl|c217312_g3_i1|m.5102	lcl|c217312_g3_i2|m.5103,lcl|c217312_g3_i1|m.5102	Q8AVR4,Q9BUL8,Q6DF07	Q8AVR4,Q9BUL8,Q6DF07
GO:1902564	biological_process	negative regulation of neutrophil activation	0.000192	16	0.000208	17	0.117684	0.815	1	0.000183	0.000198	0.109612	0.822	1	0.962	VMCQESQTCCEVSAGK,SECPADSSCCK,ESQCQEDQTCCK,LASGEYGCCPLPHAVCCSDK,CDLSAQTCTT,LSSGSWGCCPLR	LSSGSWGCCPLRK,VMCQESQTCCEVSAGK,ESECPDSNTCCK,SECPADSSCCK,CDLSAQTCTT,LSSGSWGCCPLR,SIICPDRESECPDSNTCCK	lcl|c226332_g1_i2|m.11417	lcl|c226332_g1_i2|m.11417	P23785	P23785
GO:0035151	biological_process	regulation of tube size, open tracheal system	0.00789184	659	0.00847468	693	0.102798	0.188	1	0.00710816	0.00761633	0.0996193	0.202	1	0.748	LAELEEFISGPNHAQIQQVGDR,TPQTIQR,VAEIPFNSTNKY,NNRPSEGPLQTR,IVLENSVFSDHR,SAALQEAR,ITDSTMLQGIER,VVGAMQLYSTER,VILENAAVR,LPEDDSSVTCTFTNTLK,GSSEEKENLFGR,ISGDTIFVTAPHEPTDGIIGVNR,LLYNNVSNFAK,SIAYTLTSNIPEISPFLMF,EGNYEDVVR,VATTPLVDDGSK,IYIDANNNPER,TFNETPINPR,LIFDNLK,AFMTADLPNELIELLEK,GVGIISEGTETKEDVAAR,LASTLVHLGEYQAAVDGAR,LHVIEVGTPPAGNQPF,GVGIISEGTETK,EAIDSYIK,TLQIFNIEMK,DPLNDKLVNER,NLVPQEAHV,QGAIVAVTGDGVND…	LAELEEFISGPNHAQIQQVGDR,TPQTIQR,VAEIPFNSTNKY,SAALQEAR,VVGAMQLYSTER,KVSQPIEGHAA,VILENAAVR,LPEDDSSVTCTFTNTLK,GSSEEKENLFGR,QLIDQVVQTALSETQDPEDVSCTVK,ISGDTIFVTAPHEPTDGIIGVNR,LLYNNVSNFAK,KDQEESKQDQPIV,EGNYEDVVR,QIIDYLGMQPCER,VATTPLVDDGSK,IYIDANNNPER,FQQVPSQQGQTSPLLQ,IHDGSEEPATHNALAK,TFNETPINPR,LIFDNLK,AFMTADLPNELIELLEK,GVGIISEGTETKEDVAAR,LASTLVHLGEYQAAVDGAR,KVSQPIEGHAAA,GVGIISEGTETK,EAIDSYIK,TLQIFNIEMK…	lcl|c236239_g1_i2|m.21882,lcl|c213652_g3_i1|m.3162,lcl|c236239_g1_i8|m.21884,lcl|c217788_g4_i2|m.5364,lcl|c222950_g5_i5|m.8734,lcl|c222950_g5_i5|m.8735,lcl|c243578_g4_i1|m.31087,lcl|c217447_g9_i5|m.5205,lcl|c222950_g5_i7|m.8739,lcl|c236239_g1_i4|m.21883	lcl|c236239_g1_i2|m.21882,lcl|c244324_g2_i1|m.32048,lcl|c213652_g3_i1|m.3162,lcl|c236239_g1_i8|m.21884,lcl|c217788_g4_i2|m.5364,lcl|c222950_g5_i5|m.8734,lcl|c222950_g5_i5|m.8735,lcl|c217447_g9_i5|m.5205,lcl|c222950_g5_i7|m.8739,lcl|c236239_g1_i4|m.21883	Q9QZE5,Q6Z382,P27112,Q64541,P11442,Q64392,Q9YH26,Q5RCD8,Q64436,Q66JI9,Q9Y678,Q9TV52,P13637,Q8VDN2,Q29AE5,Q9QXK3,Q9N0Z6,Q0WLB5,P09626,D2WKD8,P13607,Q2RBN7,P58312,P19156,B8V7Q1,D4ABY2,Q92030,Q7PVF6,Q92036,Q99PF4,O88277,P53675,Q14517,Q4AEF8,Q2PZL6,A2VE21,Q08DA1,Q22498,Q9H251,P33450,P18907,P04074,Q8H852,Q2QYW2,Q10161,Q8R508,Q9UBF2,Q8BNA6,Q24292,E9PVD3,Q9I8E6,P09572,P24798,Q6PIE5,Q9NYQ8,P22137,Q5RDR3,…	Q9QZE5,Q6Z382,P27112,Q64541,P11442,Q6V1P9,Q64392,Q9YH26,Q5RCD8,Q64436,Q66JI9,Q9Y678,Q9TV52,P13637,Q8VDN2,Q29AE5,Q9QXK3,Q9N0Z6,Q0WLB5,P09626,D2WKD8,P13607,Q2RBN7,P58312,P19156,B8V7Q1,D4ABY2,Q92030,Q7PVF6,Q92036,Q99PF4,O88277,P53675,Q14517,Q4AEF8,Q2PZL6,A2VE21,Q08DA1,Q22498,Q9H251,P33450,P18907,P04074,Q8H852,Q2QYW2,Q10161,Q8R508,Q9UBF2,Q8BNA6,Q24292,E9PVD3,Q9I8E6,P09572,P24798,Q6PIE5,Q9NYQ8,P22137,…
GO:0035152	biological_process	regulation of tube architecture, open tracheal system	0.00838283	700	0.00884155	723	0.0768615	0.313	1	0.00754973	0.00794557	0.073725	0.333	1	0.853	VPVGDQPPDIEMLIR,SAALQEAR,ITDSTMLQGIER,LPEDDSSVTCTFTNTLK,ISGDTIFVTAPHEPTDGIIGVNR,LLYNNVSNFAK,EGNYEDVVR,GMEDLIPIMNK,TFNETPINPR,EIVAETDRETGSNK,TLQIFNIEMK,QGAIVAVTGDGVNDSPALKR,VLSGVMLNK,GQFSTDDLVEEVEKR,ADDPSTYTEVVEAANR,TEELKEEDVGTGAGL,SMAGEIGTLDPQMER,DQEESKQDQPIV,IAAYLYK,LLLPWLEAK,FLQMAQK,LIIVEGCQR,CNEAAVWSLLAK,LWEEVLNETNQ,VMEYITR,TQDEEVGDGTTSVII,LHVIEVGTPPAGNQPFSK,SSVLENFVGR,ASIDAFDNFDNIALAQR,YVELSE…	SAALQEAR,LPEDDSSVTCTFTNTLK,ISGDTIFVTAPHEPTDGIIGVNR,LLYNNVSNFAK,QLIDQVVQTALSETQDPEDVSCTVK,EGNYEDVVR,QIIDYLGMQPCER,FQQVPSQQGQTSPLLQ,TFNETPINPR,IHDGSEEPATHNALAK,TLQIFNIEMK,QGAIVAVTGDGVNDSPALKR,VLSGVMLNK,GQFSTDDLVEEVEKR,ADDPSTYTEVVEAANR,NNLAGAEELFV,AAEQAHLWSELV,AESDIMKR,DQEESKQDQPIV,IAAYLYK,LLLPWLEAK,FLQMAQK,LIIVEGCQR,CNEAAVWSLLAK,VGLFTPDMAFEAIVK,RPISADSAIMNPK,LWEEVLNETNQ,VMEYITR,TQDEEVGDGTTSVII,LHVI…	lcl|c229132_g1_i4|m.13986,lcl|c236239_g1_i2|m.21882,lcl|c222950_g5_i5|m.8734,lcl|c222950_g5_i5|m.8735,lcl|c229132_g1_i2|m.13984,lcl|c222950_g5_i7|m.8739,lcl|c236239_g1_i4|m.21883,lcl|c213652_g3_i1|m.3162,lcl|c236239_g1_i8|m.21884,lcl|c239343_g4_i4|m.25612,lcl|c217788_g4_i2|m.5364,lcl|c243578_g4_i1|m.31087,lcl|c236015_g2_i16|m.21586,lcl|c217447_g9_i5|m.5205	lcl|c229132_g1_i4|m.13986,lcl|c232986_g1_i4|m.17993,lcl|c236239_g1_i2|m.21882,lcl|c222950_g5_i5|m.8734,lcl|c222950_g5_i5|m.8735,lcl|c229132_g1_i2|m.13984,lcl|c222950_g5_i7|m.8739,lcl|c236239_g1_i4|m.21883,lcl|c213652_g3_i1|m.3162,lcl|c244324_g2_i1|m.32048,lcl|c236239_g1_i8|m.21884,lcl|c239343_g4_i4|m.25612,lcl|c217788_g4_i2|m.5364,lcl|c236015_g2_i16|m.21586,lcl|c217447_g9_i5|m.5205	Q9QZE5,Q6Z382,P27112,Q64541,O00782,P11442,Q64392,P48605,Q9YH26,P50143,Q5RCD8,Q64436,Q66JI9,Q9Y678,Q9TV52,P13637,Q8VDN2,Q29AE5,P39054,P39053,Q9QXK3,Q5NVF9,P39055,Q9N0Z6,P39052,P49368,Q0WLB5,P09626,D2WKD8,P13607,Q2RBN7,P58312,Q9UQ16,P19156,B8V7Q1,D4ABY2,Q92030,Q7PVF6,Q92036,Q99PF4,O88277,P53675,Q84WV1,Q14517,Q4AEF8,P54408,Q2PZL6,A2VE21,Q08DA1,Q22498,Q9H251,P33450,P27619,P18907,P04074,Q6P502,Q8H852,…	Q9QZE5,Q14204,Q6Z382,P27112,M0R8U1,Q64541,O00782,P11442,P38650,Q6V1P9,Q64392,Q9C1M7,P48605,Q9YH26,P50143,Q5RCD8,Q64436,Q66JI9,Q9Y678,Q9TV52,P13637,P34036,Q8VDN2,Q9P225,Q29AE5,P37276,P39057,P39054,P39053,Q27802,Q9QXK3,Q5NVF9,P39055,E9Q8T7,Q9N0Z6,P45444,P39052,P49368,P45443,Q9JHU4,Q8VHE6,P23098,Q0WLB5,P09626,D2WKD8,P13607,Q2RBN7,P58312,Q9UQ16,P19156,B8V7Q1,Q9SMH5,D4ABY2,Q9SMH3,Q92030,Q8IVF4,Q9JJ79,…
GO:0035153	biological_process	epithelial cell type specification, open tracheal system	8.38e-05	7	6.11e-05	5	-0.455206	0.588	1	8.62e-05	6.58e-05	-0.387888	0.618	1	0.908	LAEPSLMLK,FGGIEALVR,ALNNSSDAETTR	SGGIPALVR,ALNNSSDAETTR	lcl|c241349_g1_i1|m.28471	lcl|c241349_g1_i1|m.28471	P30998,P26233,Q6P0K8,Q9WU82,B6V8E6,Q29I35,P14923,P35224,P35223,P35222,Q02453,Q8WNW3,Q0VCX4,P18824,Q17GS9,Q02257,Q02248,F1QGH7,Q7QHW5,Q8SPJ1	P30998,P26233,Q6P0K8,Q9WU82,B6V8E6,Q29I35,P14923,P35224,P35223,P35222,Q02453,Q8WNW3,Q0VCX4,P18824,Q17GS9,Q02257,Q02248,F1QGH7,Q7QHW5,Q8SPJ1
GO:0036484	biological_process	trunk neural crest cell migration	0.000443	37	0.00044	36	-0.00930763	0.978	1	0.000409	0.000406	-0.0113244	0.973	1	0.992	LLEIENEIK,TTQSVIVTGR,SDSSVQGTGFR,NDNGGFNR,IWNNNYGFYR	TTQSVIVTGR,SDSSVQGTGFR,NDNGGFNR,IWNNNYGFYR,KTEVAAENK,SKENTNVAAK	lcl|c238843_g5_i10|m.24992,lcl|c214211_g3_i3|m.3396	lcl|c238843_g5_i10|m.24992,lcl|c214211_g3_i3|m.3396	O60462,O14786	O60462,O14786
GO:1903898	biological_process	negative regulation of PERK-mediated unfolded protein response	4.79e-05	4	7.34e-05	6	0.615183	0.506	1	5.38e-05	7.68e-05	0.512577	0.542	1	0.892	GDDQENAEQNSTADAK,ETGYVPSNYVK,LTIIDDSK	LFLVKPFDEGLM,GATDGDFLVR,GDDQENAEQNSTADAK,ETGYVPSNYVK	lcl|c231996_g3_i3|m.16899,lcl|c213844_g3_i2|m.3224	lcl|c231996_g3_i3|m.16899,lcl|c213844_g3_i2|m.3224	P18031,Q99M51	P18031,Q99M51
GO:1903899	biological_process	positive regulation of PERK-mediated unfolded protein response	1.2e-05	1	1.22e-05	1	0.0302207	0.988	1	2.15e-05	2.19e-05	0.0271497	0.985	1	0.992	ALISSAATSALR	LLFAELR	lcl|c222730_g7_i1|m.8585	lcl|c222730_g7_i1|m.8585	Q9Z142	Q9Z142
GO:0060119	biological_process	inner ear receptor cell development	0.00140113	117	0.00141856	116	0.017837	0.925	1	0.00127085	0.00128402	0.0148714	0.937	1	0.992	STCGEGWECK,CPNDPYICK,TVCFVPCMFGSCPK,CDHDGVTCER,CTEPYVGTHCEVMK,VEYCMEPCIHGK,TQTCICSSSIR,EVPGFDPTHGPCTR,CEIVEQCSVPCDHGNCPSK,SCACDYGWVNQGK,SLCECEPGWVGDLCDK,HGYCGSDGLSCEK,CDCNPGYIGSDCSAQECDGCEHGR,FGSCPNDPMK,CYLSSLGK,CECHENYYGSACEK,TSNLNEELGQVR,SCACDSGWGNELR	STCGEGWECK,CPNDPYICK,TVCFVPCMFGSCPK,CDHDGVTCER,CTEPYVGTHCEVMK,VEYCMEPCIHGK,TQTCICSSSIR,EVPGFDPTHGPCTR,VSGFDPTHGPCTMVR,CEIVEQCSVPCDHGNCPSK,SCACDYGWVNQGK,SLCECEPGWVGDLCDK,HGYCGSDGLSCEK,FIFVMLGPPGTPGR,CDCNPGYIGSDCSAQECDGCEHGR,CPNKPYVCECER,SKCDCEPGWVGDLCDR,FGSCPNDPMK,CYLSSLGK,CECHENYYGSACEK,TSNLNEELGQVR,SCACDSGWGNELR,VTMSSSVSLLSR	lcl|c234785_g1_i10|m.20251,lcl|c242793_g1_i1|m.30226,lcl|c234785_g1_i5|m.20254,lcl|c242793_g1_i1|m.30227	lcl|c234785_g1_i10|m.20251,lcl|c242793_g1_i1|m.30226,lcl|c234785_g1_i5|m.20254,lcl|c233765_g2_i2|m.18984,lcl|c222669_g8_i2|m.8513,lcl|c242793_g1_i1|m.30227,lcl|c233765_g2_i1|m.18981	P98198,P98197,Q8TF62,P98199,Q9Y2Q0,Q9SAF5,P32660,Q9Y2G3,Q9XIE6,Q9SX33,O60423,P70704,P57792,Q9NTI2,Q12675,A3FIN4,Q9LK90,P98200,Q90Y54,O43520,P98204,Q5BL50,Q9QZW0,C7EXK4,P39524,O94296,Q29449,Q8NB49,Q9LNQ4,Q9N0Z4,P98196,Q148W0,Q9U280,Q9LI83	P98198,P98197,P98199,Q9SAF5,P32660,Q9Y2G3,Q8JZR6,Q9R1N3,Q9SX33,P70704,O13134,Q4U116,Q9GKY1,Q6U841,Q12675,Q9LK90,Q80ZA5,P98200,Q8R418,O43520,P98204,Q5BL50,Q9QZW0,Q6RI88,P39524,Q8NB49,Q9JI66,Q9N0Z4,Q148W0,Q9U280,Q9LI83,Q8TF62,Q5DTL9,Q9Y2Q0,Q9Y6M7,Q6RVG2,Q9XIE6,Q96Q91,O60423,P57792,Q9NTI2,Q9XSZ4,Q2Y0W8,Q8K4V2,Q32LP4,A3FIN4,Q9Y6R1,Q90Y54,C7EXK4,O94296,Q9GL77,Q29449,Q9LNQ4,O88343,P98196
GO:1903896	biological_process	positive regulation of IRE1-mediated unfolded protein response	4.79e-05	4	4.89e-05	4	0.0302207	0.976	1	5.38e-05	5.49e-05	0.0271497	0.976	1	0.992	ALISSAATSALR,EIEPEEEELAVVR,GEQSGEMNTSSVTARPDA,GDDQENAEQNSTADAK	LLFAELR,EIEPEEEELAVVR,GDDQENAEQNSTADAK	lcl|c210230_g1_i1|m.2146,lcl|c222730_g7_i1|m.8585,lcl|c213844_g3_i2|m.3224	lcl|c210230_g1_i1|m.2146,lcl|c222730_g7_i1|m.8585,lcl|c213844_g3_i2|m.3224	Q16611,P18031,Q9Z142,O08734	Q16611,P18031,Q9Z142,O08734
GO:1903897	biological_process	regulation of PERK-mediated unfolded protein response	5.99e-05	5	8.56e-05	7	0.515648	0.539	1	6.46e-05	8.78e-05	0.442187	0.569	1	0.892	ALISSAATSALR,GDDQENAEQNSTADAK,ETGYVPSNYVK,LTIIDDSK	LLFAELR,LFLVKPFDEGLM,GATDGDFLVR,GDDQENAEQNSTADAK,ETGYVPSNYVK	lcl|c222730_g7_i1|m.8585,lcl|c231996_g3_i3|m.16899,lcl|c213844_g3_i2|m.3224	lcl|c222730_g7_i1|m.8585,lcl|c231996_g3_i3|m.16899,lcl|c213844_g3_i2|m.3224	P18031,Q9Z142,Q99M51	P18031,Q9Z142,Q99M51
GO:0006611	biological_process	protein export from nucleus	0.00918519	767	0.01004	821	0.128376	0.0749	1	0.00827132	0.00902107	0.125182	0.0824	1	0.483	AEFQEQSSK,QLQEAQATALPDDDDADL,TELTSQSK,APFDLFENR,QIDNPNYKGEWIHPEIDNPEYQPDDALY,AEVAAEDGDR,QLQAAQEEK,TQSEVDSQTAAQHAEIMEK,QSEEEYEK,DNLTLWTSNQEGEEDDGN,NLLSVAYK,SIEEMQQQNQK,EAFDDSIADLDK,SAELQTVPNTEK,FYNDADLDKGIQTSEDAKF,GEWIHPEIDNPEYQPDDA,MKDEQDEK,FNVWDTAGQEK,YVVENTEEDLTDEER,ALLFLPR,LSSDNPGK,ALTAAAAAASNASSR,HEQSIDCGGGYVK,LQEDSYK,YDDMVEEMK,MQGDYFR,FYNDADLDK,SGTIFDNILVTDSVE,EMLQQNK,GEWIHPEIDNPEYQPDDAL,FYE…	EAFDDSIADLDKLQEDSY,QLQEAQATALPDDDDADL,APFDLFENR,QIDNPNYKGEWIHPEIDNPEYQPDDALY,AEVAAEDGDR,QLQAAQEEK,QSEEEYEK,DNLTLWTSNQEGEEDDGN,QMHGDSPYL,HLEVNPDHSIVETLR,NLLSVAYK,SIEEMQQQNQK,EAFDDSIADLDK,SGTIFDNILVTD,FYNDADLDKGIQTSEDAKF,GEWIHPEIDNPEYQPDDA,MKDEQDEK,QIDNPNYKGEWIHPEIDNPEYQPDDALYK,FNVWDTAGQEK,YVVENTEEDLTDEER,ALLFLPR,DIEGSDVDTR,ALTAAAAAASNASSR,HEQSIDCGGGYVK,TSPVSVPISPER,YDDMVEEMK,FYNDADLDK,SGTIFDNILVTD…	lcl|c210749_g1_i1|m.2273,lcl|c237638_g1_i10|m.23524,lcl|c229550_g1_i3|m.14392,lcl|c217466_g1_i2|m.5214,lcl|c217466_g1_i3|m.5215,lcl|c214228_g4_i5|m.3407,lcl|c237638_g1_i10|m.23526,lcl|c208130_g1_i1|m.1735,lcl|c238692_g2_i2|m.24838,lcl|c214228_g4_i5|m.3408,lcl|c214228_g4_i6|m.3409,lcl|c241047_g4_i1|m.28118,lcl|c244041_g1_i1|m.31667,lcl|c237638_g1_i15|m.23528,lcl|c244235_g1_i2|m.31919,lcl|c219662_g…	lcl|c210749_g1_i1|m.2273,lcl|c237638_g1_i10|m.23524,lcl|c229550_g1_i3|m.14392,lcl|c217466_g1_i2|m.5214,lcl|c217466_g1_i3|m.5215,lcl|c214228_g4_i5|m.3407,lcl|c237638_g1_i10|m.23526,lcl|c208130_g1_i1|m.1735,lcl|c227706_g1_i4|m.12692,lcl|c238692_g2_i2|m.24838,lcl|c214228_g4_i6|m.3409,lcl|c241047_g4_i1|m.28118,lcl|c227706_g1_i7|m.12694,lcl|c244041_g1_i1|m.31667,lcl|c237638_g1_i15|m.23528,lcl|c244235_…	Q9SMV6,P07901,Q9XZU1,P07900,Q9PTU3,Q6P5F9,Q2F637,Q9TVM2,P35658,F6ZDS4,Q69QQ6,Q07078,P61023,P61022,F1MA98,Q7SZC2,Q90474,P41932,P27323,Q76LV2,Q61W58,Q20655,P11499,P04809,Q76LV1,F4IZR5,O57521,A5D785,P14211,P42656,Q9GKX8,P42657,Q9GKX7,P12270,Q6GMY9,Q9ZPY7,P82995,P36181,Q4R4P1,Q4R4T5,P54632,O02705,Q5R710,Q9ERK4,P30822,A5A6K9,P30947,P30946,Q54EV7,P11501,Q7PT10,O61998,P14068,O08852,O02192,P02828,Q5R9J2,…	Q9SMV6,P07901,Q9XZU1,P07900,Q9PTU3,Q6P5F9,Q2F637,Q9TVM2,P35658,F6ZDS4,Q69QQ6,Q07078,P61023,P61022,F1MA98,Q7SZC2,Q90474,P41932,P27323,Q76LV2,Q91757,Q61W58,Q20655,P11499,P04809,Q76LV1,F4IZR5,O57521,A5D785,P14211,P42656,Q9GKX8,P42657,Q9GKX7,P12270,Q6GMY9,Q9ZPY7,P49841,P82995,P36181,Q4R4P1,Q4R4T5,P54632,O02705,Q5R710,Q9ERK4,P30822,A5A6K9,P30947,P30946,Q54EV7,P18266,P11501,Q7PT10,O61998,P14068,O08852,…
GO:0006612	biological_process	protein targeting to membrane	0.00695775	581	0.00715395	585	0.0401192	0.634	1	0.00626811	0.00643108	0.0370312	0.66	1	0.922	QGYVIYR,LIEVDDER,EGIPPDQQR,AVGVIVNK,QIVPSTENIK,AIEDCQK,NYDPQKDK,GLAGTLPEDLYFLIK,VLEQLTGQQPVFSK,NVPELLEPIPYEF,QASAQQPALGYAPQPGAPPAVVPSVSSSLYPSLV,YDAFLASDSLIR,AFSPATINTGR,VDQMAQAQAR,SEDAFLENLR,QGIMTNGR,SNPELFDELR,GATYGKPTNQGVNQLK,TILASQSVTIPK,LQIWDTAGQER,SDATQVQK,ISLGLPVGAVINCADNTGAK,SQGQDPQTDDKDPDPQ,SLEEIFETAIQTR,GGSTAAQPTDQDRA,QLQQIDGTLSTIEFQR,LFEGNALLR,VLNSYWVAEDSTYK,IVVNLTGR,DVLETLEEK,EQPPTTQEA…	QGYVIYR,LIEVDDER,EGIPPDQQR,AVGVIVNK,GLAGTLPEDLYFLIK,VLEQLTGQQPVFSK,NVPELLEPIPYEF,KGQGGGSDAEEED,QASAQQPALGYAPQPGAPPAVVPSVSSSLYPSLV,VDQMAQAQAR,SEDAFLENLR,QGIMTNGR,SNPELFDELR,GATYGKPTNQGVNQLK,TILASQSVTIPK,LQIWDTAGQER,AVDWEQLEAR,SDATQVQK,ISLGLPVGAVINCADNTGAK,SQGQDPQTDDKDPDPQ,SLEEIFETAIQTR,LFEGNALLR,IVVNLTGR,EQPPTTQEAIQK,GQAQEAVDQHR,EALENANTNTEVLK,SKEQPPTTQEAIQK,IQDKEGIPPDQQR,TPLTSEQAFYAR,EVEKPGSK,GGS…	lcl|c231891_g1_i1|m.16759,lcl|c221039_g1_i2|m.7339,lcl|c211022_g1_i7|m.2328,lcl|c231440_g4_i2|m.16256,lcl|c222420_g3_i2|m.8319,lcl|c220736_g3_i1|m.7111,lcl|c236588_g1_i1|m.22288,lcl|c219327_g1_i2|m.6330,lcl|c231210_g4_i4|m.16042,lcl|c222854_g1_i1|m.8663,lcl|c231440_g4_i1|m.16255,lcl|c229067_g1_i3|m.13935,lcl|c243393_g3_i1|m.30930,lcl|c216367_g2_i7|m.4555,lcl|c214032_g1_i4|m.3331,lcl|c210342_g3_i4…	lcl|c231891_g1_i1|m.16759,lcl|c221039_g1_i2|m.7339,lcl|c211022_g1_i7|m.2328,lcl|c231440_g4_i2|m.16256,lcl|c222420_g3_i2|m.8319,lcl|c220736_g3_i1|m.7111,lcl|c236588_g1_i1|m.22288,lcl|c219327_g1_i2|m.6330,lcl|c231210_g4_i4|m.16042,lcl|c222854_g1_i1|m.8663,lcl|c231440_g4_i1|m.16255,lcl|c229067_g1_i3|m.13935,lcl|c243393_g3_i1|m.30930,lcl|c216367_g2_i7|m.4555,lcl|c214032_g1_i4|m.3331,lcl|c210342_g3_i4…	Q9DCF9,Q90YU5,P62914,O43795,P62992,P38377,Q6ITC7,E7F9L8,P61028,P61027,P61026,F1PRN2,P62913,Q5SYD0,P62753,P62754,Q5NVM7,P62755,Q5NVE0,Q8R0J7,Q5EA68,Q3SYR7,Q9UBC5,P46781,Q90YL4,Q4R5B2,Q3T057,Q62774,O00159,P62244,P62245,O88329,P24409,Q9WTI7,Q5ZKU5,P61314,P61313,P91580,P62246,P46778,Q9CZM2,P21531,Q90ZM2,O00560,Q76I82,Q4R4K6,Q8BMA6,Q8AY34,Q29205,Q8AY35,Q8AY36,Q5EAD6,A9L913,Q15286,Q23979,P40429,Q23978,…	Q9DCF9,Q4R5C7,Q90YU5,P62914,A7RQM5,O43795,P62992,P38377,Q6ITC7,E7F9L8,P61028,P61027,P61026,F1PRN2,P62913,Q5SYD0,P62753,P62754,Q5NVM7,P62755,Q5NVE0,Q8R0J7,Q5EA68,Q3SYR7,Q9UBC5,P46781,Q90YL4,Q4R5B2,Q3T057,Q62774,O00159,P62244,P62245,O88329,P24409,Q9WTI7,Q5ZKU5,P61314,P61313,P91580,P62246,P46778,Q9CZM2,P21531,Q90ZM2,O00560,Q76I82,Q4R4K6,Q8AY34,Q29205,Q8AY35,Q8AY36,Q5EAD6,A9L913,Q15286,Q23979,P40429,…
GO:0006610	biological_process	ribosomal protein import into nucleus	0.000383	32	0.000281	23	-0.446217	0.256	1	0.000355	0.000263	-0.432282	0.262	1	0.821	GSAITGPVAK,ESQSPNTEVQR,ECADLWPR,ADNEDDEAVPDSEQDIRPR,LPAAGSGDMVLATVK,LNRLPAAGSGDMVLA,ISLGLPVGAVINCADNTGAK,YIMQNALSSDYR,SGFLPYAEPVFQR	GSAITGPVAK,ESQSPNTEVQR,ECADLWPR,VMPAVVIR,LPAAGSGDMVLATVK,LNRLPAAGSGDMVLA,ISLGLPVGAVINCADNTGAK,QFVDLVPGIVQAVR	lcl|c239392_g1_i1|m.25726,lcl|c211368_g3_i1|m.2426,lcl|c232587_g1_i15|m.17560	lcl|c239392_g1_i1|m.25726,lcl|c211368_g3_i1|m.2426,lcl|c232587_g1_i15|m.17560	Q8H0U4,Q90YU5,Q3SYU7,O14089,Q8BIV3,Q8BFY9,P62829,O00410,O60518,Q8BKC5,Q3T057,Q99LG2,B8ARW2,B9FDR3,Q92973,O14787,P62830,P62831,P62832	Q8H0U4,Q90YU5,Q3SYU7,O14089,Q8BIV3,Q8BFY9,P62829,O00410,O60518,Q8BKC5,Q3T057,Q99LG2,B8ARW2,B9FDR3,Q92973,O14787,P62830,P62831,P62832
GO:0060117	biological_process	auditory receptor cell development	0.00138915	116	0.00138187	113	-0.0075813	0.968	1	0.00126008	0.0012511	-0.010325	0.957	1	0.992	STCGEGWECK,CPNDPYICK,TVCFVPCMFGSCPK,CDHDGVTCER,CTEPYVGTHCEVMK,VEYCMEPCIHGK,TQTCICSSSIR,EVPGFDPTHGPCTR,CEIVEQCSVPCDHGNCPSK,SCACDYGWVNQGK,SLCECEPGWVGDLCDK,HGYCGSDGLSCEK,CDCNPGYIGSDCSAQECDGCEHGR,FGSCPNDPMK,CYLSSLGK,CECHENYYGSACEK,SCACDSGWGNELR	STCGEGWECK,CPNDPYICK,TVCFVPCMFGSCPK,CDHDGVTCER,CTEPYVGTHCEVMK,VEYCMEPCIHGK,TQTCICSSSIR,EVPGFDPTHGPCTR,VSGFDPTHGPCTMVR,CEIVEQCSVPCDHGNCPSK,SCACDYGWVNQGK,SLCECEPGWVGDLCDK,HGYCGSDGLSCEK,FIFVMLGPPGTPGR,CDCNPGYIGSDCSAQECDGCEHGR,CPNKPYVCECER,SKCDCEPGWVGDLCDR,FGSCPNDPMK,CYLSSLGK,CECHENYYGSACEK,SCACDSGWGNELR	lcl|c242793_g1_i1|m.30226,lcl|c242793_g1_i1|m.30227	lcl|c242793_g1_i1|m.30226,lcl|c233765_g2_i2|m.18984,lcl|c242793_g1_i1|m.30227,lcl|c233765_g2_i1|m.18981	Q90Y54	Q80ZA5,Q9Y6R1,Q5DTL9,Q90Y54,Q9Y6M7,Q6RI88,Q8JZR6,Q6RVG2,Q9R1N3,Q96Q91,Q9GL77,O13134,Q4U116,Q9XSZ4,Q9GKY1,Q9JI66,Q2Y0W8,Q8K4V2,O88343,Q6U841,Q32LP4
GO:0061448	biological_process	connective tissue development	1.2e-05	1	2.45e-05	2	1.03022	0.551	1	2.15e-05	3.29e-05	0.612112	0.64	1	0.909	SNTITNGTSGGFP	SDLQSTEQEK,ANSASSAMPIPSIPTPAIVTSPNASSPPSFI	lcl|c221540_g4_i1|m.7721	lcl|c243672_g3_i1|m.31224,lcl|c226851_g1_i3|m.11866	P48442	O93602,A2AAY5,P15336
GO:0006605	biological_process	protein targeting	0.0161789	1351	0.0168026	1374	0.0545751	0.319	1	0.014561	0.01509	0.0514862	0.348	1	0.862	LIEVDDER,AVGVIVNK,QIVPSTENIK,TSLMNQYVNK,GLAGTLPEDLYFLIK,VLEQLTGQQPVFSK,GYISPYFINTTK,VTSPEDTMNQLK,VIEEYR,LLEPVVNMTDMLR,ILALNDIR,QLQQIDGTLSTIEFQR,LALADAGDTVEDANFVEK,VGLQVAAVK,IQDKEGIPPDQQR,TPLTSEQAFYAR,GISGSALPYR,MVVPTALR,ALELDPGSTFYQTSLSQVEEK,SENESESAR,VHENEQK,EVGMELDSNK,EGFEIVSK,EVMVDDR,ALNEVLESYGH,NALAQETEVELYNDFPDQIK,AVVPQTSGMVAPVTGDN,TLQDELELIEGMK,AVVPQTSGMVAPVTGDNNFGVR,GANPQEVR,NPEDVTSLR,VTAS…	LIEVDDER,AVGVIVNK,GLAGTLPEDLYFLIK,VLEQLTGQQPVFSK,GYISPYFINTTK,KGQGGGSDAEEED,LLEPVVNMTDMLR,ILALNDIR,VGLQVAAVK,IQDKEGIPPDQQR,TPLTSEQAFYAR,LQNGRPVNVVSK,GISGSALPYR,MVVPTALR,ALELDPGSTFYQTSLSQVEEK,AQAWCHSK,SENESESAR,EVGMELDSNK,EGFEIVSK,EVMVDDR,ALNEVLESYGH,NALAQETEVELYNDFPDQIK,AVVPQTSGMVAPVTGDN,QVLLRPSSK,TLQDELELIEGMK,LLAFPSIIEK,NALAQETEVEL,AVVPQTSGMVAPVTGDNNFGVR,GANPQEVR,LVQDVANNTNEEAGDGTTTA,IANGSLSGIS…	lcl|c240346_g7_i3|m.27102,lcl|c222420_g3_i2|m.8319,lcl|c221672_g4_i6|m.7784,lcl|c221672_g4_i1|m.7781,lcl|c243393_g3_i1|m.30930,lcl|c216367_g2_i7|m.4555,lcl|c238814_g3_i2|m.24928,lcl|c241090_g1_i1|m.28152,lcl|c239543_g6_i2|m.25954,lcl|c243758_g2_i1|m.31278,lcl|c237883_g5_i1|m.23858,sp|RS27A_HUMAN|,lcl|c239496_g4_i3|m.25878,lcl|c213783_g1_i1|m.3203,lcl|c235513_g2_i1|m.20994,lcl|c214925_g1_i1|m.3737…	lcl|c240346_g7_i3|m.27102,lcl|c222420_g3_i2|m.8319,lcl|c221672_g4_i6|m.7784,lcl|c232224_g3_i2|m.17159,lcl|c221672_g4_i1|m.7781,lcl|c243393_g3_i1|m.30930,lcl|c216367_g2_i7|m.4555,lcl|c238814_g3_i2|m.24928,lcl|c241090_g1_i1|m.28152,lcl|c239543_g6_i2|m.25954,lcl|c243758_g2_i1|m.31278,lcl|c237883_g5_i1|m.23858,sp|RS27A_HUMAN|,lcl|c242671_g2_i1|m.30114,lcl|c235513_g2_i1|m.20994,lcl|c214691_g1_i1|m.361…	Q9DCF9,P62914,O43795,O73885,P54614,Q9VCA9,Q5NVM9,Q5R7D3,P38377,E7F9L8,Q9N1U2,P61028,Q6NY64,P61027,P23787,F1PRN2,P61026,P62913,Q5NVM5,Q5SYD0,Q5RF10,Q5NVM7,P84817,Q9UBC5,P50140,P46781,Q66LE6,Q05046,Q90YL4,Q62774,Q3T057,O00159,P62244,P62245,O35114,O88329,Q96AJ9,P24409,Q5ZKU5,Q9Z254,P91580,P62246,P10809,P46778,P56932,Q90ZM2,P29197,P18067,Q4R4K6,Q9Y6Q5,Q8AY34,Q8AY35,Q5XIC0,Q8AY36,A9L913,Q05944,Q9VVI3,…	Q9DCF9,P62914,O43795,O73885,P54614,Q9VCA9,Q5NVM9,Q5R7D3,P38377,E7F9L8,Q9N1U2,P61028,Q6NY64,P61027,P23787,F1PRN2,P61026,P62913,Q5NVM5,Q5SYD0,Q5RF10,Q5NVM7,Q68FS3,P84817,Q9UBC5,P50140,P46781,Q66LE6,Q05046,Q90YL4,Q62774,Q3T057,O00159,P62244,P62245,O35114,O88329,Q96AJ9,P24409,Q5ZKU5,Q9Z254,P91580,P62246,P10809,P46778,P56932,Q90ZM2,P29197,P18067,Q4R4K6,Q9Y6Q5,Q8AY34,Q8AY35,Q5XIC0,Q8AY36,A9L913,Q05944,…
GO:0048499	biological_process	synaptic vesicle membrane organization	0.00018	15	0.000122	10	-0.554742	0.343	1	0.000172	0.000121	-0.513419	0.361	1	0.876	SSVLENFVGR,GISSLPINLR,VPVGDQPPDIEMLIR,GMEDLIPIMNK,EIVAETDRETGSNK,SMAGEIGTLDPQMER,AIEGGGDSIDTK	SSVLENFVGR,VGLFTPDMAFEAIVK,AIEGGGDSIDTK,QLLTEFEYSK	lcl|c239343_g4_i4|m.25612	lcl|c239343_g4_i4|m.25612,lcl|c228331_g1_i1|m.13257	Q05193,P50570,Q08877,Q9UQ16,Q08DF4,Q8BZ98,P39054,A6H7I5,P39053,P27619,P39055,P39052,P21575	Q05193,P50570,Q08877,Q9UQ16,Q08DF4,A7E3W5,Q8BZ98,P39054,A6H7I5,P39053,P27619,P39055,P39052,P21575
GO:0006606	biological_process	protein import into nucleus	0.0024909	208	0.00238465	195	-0.0628887	0.661	1	0.00225092	0.00215101	-0.0654996	0.648	1	0.916	AEFQEQSSK,NQVAMNPTNTIFDAK,EHPNVQN,FDDASVQSDMK,QLQEAQATALPDDDDADL,TELTSQSK,ELENANDLLAAAR,TQSEVDSQTAAQHAEIMEK,GMTTSNNLLGK,ISLGLPVGAVINCADNTGAK,NPTNTDTSR,NAQSSSGGGSFNR,SIEEMQQQNQK,SAELQTVPNTEK,DLVGIAQTGSGK,EVDEVVLVGGSTR,VNLGELPER,EGFQQPTVIQAQGWPVALSGR,LSKDDIDR,TTPSYVAFTENER,SLIFTETK,ESQSPNTEVQR,ECADLWPR,VNAEQQFSQIEK,SELSVSGR,FNVWDTAGQEK,LSSDNPGK,ALTAAAAAASNASSR,ELAQQVQAVSSQYGR,TFLDQAAQVNAWDR,QKELESI…	GVEICIATPGR,NQVAMNPTNTIFDAK,FDDASVQSDMK,GNAPILVATDVASR,QLQEAQATALPDDDDADL,VCENVPIVLCGNK,ELENANDLLAAAR,ISLGLPVGAVINCADNTGAK,QFVDLVPGIVQAVR,NPTNTDTSR,NAQSSSGGGSFNR,SIEEMQQQNQK,DLVGIAQTGSGK,LMSLAEQAK,VNLGELPER,EGFQQPTVIQAQGWPVALSGR,TTPSYVAFTENER,ESQSPNTEVQR,ECADLWPR,TIIEQIRPDR,VNAEQQFSQIEK,SELSVSGR,FNVWDTAGQEK,SQNALVTNLQTLQNNLER,DIEGSDVDTR,ALTAAAAAASNASSR,ELAQQVQAVSSQYGR,VLQQTINYLK,TSPVSVPISPER,TFLD…	lcl|c214228_g4_i5|m.3407,lcl|c221840_g3_i5|m.7911,lcl|c221840_g3_i2|m.7908,lcl|c223941_g1_i2|m.9485,lcl|c238692_g2_i2|m.24838,lcl|c214228_g4_i5|m.3408,lcl|c216388_g2_i3|m.4568,lcl|c232587_g1_i15|m.17560,lcl|c241251_g1_i2|m.28363,lcl|c214228_g4_i6|m.3409,lcl|c225222_g1_i4|m.10453,lcl|c241251_g1_i1|m.28362,lcl|c231881_g1_i2|m.16748,lcl|c239392_g1_i1|m.25726,lcl|c211368_g3_i1|m.2426,lcl|c244235_g1_i…	lcl|c214228_g4_i5|m.3407,lcl|c234737_g1_i5|m.20192,lcl|c221840_g3_i5|m.7911,lcl|c221840_g3_i2|m.7908,lcl|c223941_g1_i2|m.9485,lcl|c238692_g2_i2|m.24838,lcl|c216388_g2_i3|m.4568,lcl|c232587_g1_i15|m.17560,lcl|c241251_g1_i2|m.28363,lcl|c214228_g4_i6|m.3409,lcl|c225222_g1_i4|m.10453,lcl|c241251_g1_i1|m.28362,lcl|c231881_g1_i2|m.16748,lcl|c239392_g1_i1|m.25726,lcl|c211368_g3_i1|m.2426,lcl|c244235_g1_…	Q90YU5,Q4X195,O73885,Q9PTU3,Q63850,P35658,F6ZDS4,Q5NVM9,Q5R7D3,Q4R888,P17156,Q4R6M5,Q9N1U2,Q92973,Q7YQC6,O14787,P26413,Q28222,P16627,Q9U639,Q3T057,Q99LG2,B8ARW2,A5D785,Q01877,Q2U070,A2Q0Z1,P12270,Q92841,O15523,Q9ZPY7,Q91233,P08418,Q61656,Q3SYU7,P11147,P14659,P33611,P22954,Q24789,Q05944,Q9FZK4,P22953,P41753,P34933,P62829,P34931,P34930,Q04967,O65719,Q6S4N2,Q91291,P24629,Q9I8F9,P55063,Q9W6Y1,P55060,…	Q90YU5,Q4X195,O73885,Q9PTU3,Q63850,P35658,F6ZDS4,Q5NVM9,Q5R7D3,Q4R888,P17156,Q4R6M5,Q9N1U2,Q92973,Q7YQC6,O14787,P26413,Q28222,P16627,Q9U639,Q3T057,Q99LG2,B8ARW2,A5D785,Q01877,Q2U070,A2Q0Z1,P12270,Q92841,O15523,Q9ZPY7,Q91233,P08418,Q61656,Q3SYU7,P11147,P14659,P33611,P22954,Q24789,Q05944,P22953,P41753,P34933,P62829,P34931,P34930,Q04967,O65719,Q6S4N2,Q91291,P24629,Q9I8F9,P55063,Q9W6Y1,P55060,P22202,…
GO:0098742	biological_process	cell-cell adhesion via plasma-membrane adhesion molecules	0.00540094	451	0.00541744	443	0.0044	0.964	1	0.00486801	0.00487269	0.0013866	0.988	1	0.994	VFQANVDANNIVK,YGENPFGCYK,GVGNPAPEINWIK,SDALDSNGR,YGTQTQPYNTFAVNVVVSPIINK,SQDILAPDFSR,CLECEK,QSINDADSSIR,TPETSLR,VAVLPGMPR,LDLITADDVTDIEDDIGR,IAEVDELSPEMGER,ETSTLPDDVANYK,ANEKAPENDQK,TPENISFWR,LTNTQESASR,AAYADGNATDMEK,TSLEIHY,LVEQMPISSR,CFTIASVK,GVGNPAPEINWIKDGER,NAVGYSDEESVAATTK,VTAQDKDSGPNGQVTY,GLESNTDLR,TEEEVPGKPTEVK,GWYTANNYGK,NENFVAWK,TVGNEDLLSFVTK,TGTFMVVDSTLDR,TVNVGPDILMLK,VTCVAFDPTGVK,VTDL…	ETGQMDANTIK,FSYYTEGNTQTFK,TVDGYVILAAAGNLFA,GVGNPAPEINWIK,SDALDSNGR,YGTQTQPYNTFAVNVVVSPIINK,SQDILAPDFSR,IDPIPDILVNEGENVMLECK,VAVLPGMPR,IAEVDELSPEMGER,TPENISFWR,ISQASSDSYPSGQR,GVTEDNGR,AAYADGNATDMEK,AYIATQGPLPETVDDFWR,TSLEIHY,LVEQMPISSR,CFTIASVK,TIDIFNYVAYLR,NAVGYSDEESVAATTK,NENFVAWK,GQVISGTQVR,TVGNEDLLSFVTK,RLSTNSSSVDNLK,VTCVAFDPTGVK,GPSTPPLAYAHR,WTDGGIYTCK,EQEILQHVSMNITIGEK,ITAMTADDGGLYECR,VLWNEP…	lcl|c226711_g3_i10|m.11723,lcl|c235446_g2_i1|m.20934,lcl|c220963_g1_i2|m.7277,lcl|c236195_g4_i1|m.21828,lcl|c220963_g1_i1|m.7276,lcl|c240297_g1_i2|m.27045,lcl|c227080_g2_i3|m.12113,lcl|c243566_g1_i6|m.31084,lcl|c240077_g1_i6|m.26741,lcl|c237457_g1_i3|m.23289,lcl|c240077_g1_i2|m.26738,lcl|c236174_g2_i4|m.21790,lcl|c226711_g3_i1|m.11720,lcl|c241105_g3_i3|m.28180,lcl|c243578_g4_i1|m.31087,lcl|c23367…	lcl|c230890_g3_i2|m.15750,lcl|c217363_g1_i6|m.5152,lcl|c217363_g1_i5|m.5151,lcl|c235446_g2_i1|m.20934,lcl|c217363_g1_i4|m.5150,lcl|c220963_g1_i2|m.7277,lcl|c236195_g4_i1|m.21828,lcl|c220963_g1_i1|m.7276,lcl|c240077_g1_i3|m.26739,lcl|c240297_g1_i2|m.27045,lcl|c233679_g3_i13|m.18855,lcl|c227080_g2_i3|m.12113,lcl|c227080_g2_i4|m.12114,lcl|c242550_g2_i7|m.29927,lcl|c240077_g1_i7|m.26742,lcl|c240077_g…	B0V2N1,Q8R508,A7MBJ4,Q8BNA6,F1NWE3,Q24292,P35613,Q3U435,E9PVD3,P13590,D3YXG0,Q7TPD3,E1C8P7,A2A8L5,P23468,O89026,Q9NYQ8,F1NY98,Q9Y5R2,Q96JQ0,P16621,P51512,Q5F226,Q13332,A4IFW2,Q64604,Q8TDW7,Q64605,Q19319,P97603,B8V7Q1,P11584,Q64487,Q96RW7,P58365,Q99PF4,O88277,Q92626,Q14517,Q9VW71,P10586,Q13308,Q9Y6N7,Q2PZL6,P51655,Q9VBW3,Q9H251,Q6V0I7,O55005,P33450,D4ACX8	B0V2N1,Q8R508,A7MBJ4,Q8BNA6,F1NWE3,Q24292,P35613,E9PVD3,Q6V1P9,P13590,D3YXG0,Q7TPD3,A2A8L5,P23468,O89026,Q9NYQ8,Q9HAR2,F1NY98,Q9Y5R2,Q96JQ0,P16621,P51512,B8VIW9,Q5F226,Q13332,A4IFW2,Q64604,Q8TDW7,Q64605,O95490,P97603,B8V7Q1,P11584,Q64487,Q96RW7,P58365,Q99PF4,O88277,Q92626,Q14517,O94779,Q9VW71,P10586,Q13308,Q9Y6N7,Q2PZL6,P51655,Q9H251,Q6V0I7,P33450,D4ACX8
GO:0098743	biological_process	cell aggregation	0.00583206	487	0.00610226	499	0.0653388	0.476	1	0.00525573	0.00548727	0.0621966	0.497	1	0.892	LAELEEFISGPNHAQIQQVGDR,TPQTIQR,NNRPSEGPLQTR,IQEAAIVDNLK,IVLENSVFSDHR,VVGAMQLYSTER,ISGDTIFVTAPHEPTDGIIGVNR,LLYNNVSNFAK,VVSQNPSER,EGNYEDVVR,IYIDANNNPER,AFMTADLPNELIELLEK,LASTLVHLGEYQAAVDGAR,LHVIEVGTPPAGNQPF,LTAEQALAHPY,EAIDSYIK,TLQIFNIEMK,TLFPGNDHIDQLT,GQFSTDDLVEEVEKR,ADDPSTYTEVVEAANR,ILDFGLAR,AINEALNDLLIDEEDYNGL,NFVGDYIGYDDNPALR,DQEESKQDQPIV,LAELEEFISGPNHA,LECSEELGDLVK,FNTLFSNMQYSEAAK,IAAYLYK,LLLP…	LAELEEFISGPNHAQIQQVGDR,TPQTIQR,VVGAMQLYSTER,KVSQPIEGHAA,QLIDQVVQTALSETQDPEDVSCTVK,ISGDTIFVTAPHEPTDGIIGVNR,LLYNNVSNFAK,VVSQNPSER,KDQEESKQDQPIV,EGNYEDVVR,SGGIPALVR,IYIDANNNPER,FQQVPSQQGQTSPLLQ,IHDGSEEPATHNALAK,AFMTADLPNELIELLEK,DLIEIMQTSENPFIR,LASTLVHLGEYQAAVDGAR,KVSQPIEGHAAA,LTAEQALAHPY,EAIDSYIK,TLQIFNIEMK,GQFSTDDLVEEVEKR,ADDPSTYTEVVEAANR,ILDFGLAR,AINEALNDLLIDEEDYNGL,MAEEEMTGYVATR,NNLAGAEELFV,AAEQ…	lcl|c244041_g1_i1|m.31667,lcl|c236793_g3_i7|m.22527,lcl|c241349_g1_i1|m.28471,lcl|c221440_g2_i5|m.7632,lcl|c221440_g2_i2|m.7631,lcl|c224463_g4_i7|m.9834,lcl|c236793_g3_i6|m.22526,lcl|c236793_g3_i9|m.22532,lcl|c236793_g3_i7|m.22528,lcl|c224463_g4_i2|m.9831,lcl|c217447_g9_i5|m.5205	lcl|c244041_g1_i1|m.31667,lcl|c236793_g3_i7|m.22527,lcl|c241349_g1_i1|m.28471,lcl|c201157_g2_i3|m.1183,lcl|c221440_g2_i5|m.7632,lcl|c221440_g2_i2|m.7631,lcl|c224463_g4_i7|m.9834,lcl|c236793_g3_i6|m.22526,lcl|c236793_g3_i9|m.22532,lcl|c236793_g3_i7|m.22528,lcl|c224463_g4_i2|m.9831,lcl|c217447_g9_i5|m.5205	Q2US45,Q05096,O43795,Q29I35,A4RE77,A1C4A5,Q59MQ0,A5E4A8,P11442,Q04439,P34092,Q02257,A3LYL7,A8N2Y6,Q2HDI2,Q6CVE9,P22137,Q9Y7Z8,P29742,P30998,P26233,P10569,Q6FN18,B6V8E6,Q758Q9,P14923,A8PWF6,Q02453,Q8WNW3,Q17GS9,P70618,O00160,A5DKH0,Q02248,Q7Z8J6,Q9GM70,Q92002,A7TDZ8,E9Q634,P22467,P46735,Q8SPJ1,Q0CEX5,Q0WLB5,P34109,P25870,Q12965,A1DBH2,Q2RBN7,Q0WNJ6,P36006,Q68FD5,P0CP01,Q6BUQ2,A2R5J1,P0CP00,P70248,…	Q2US45,Q05096,O43795,Q29I35,A4RE77,A1C4A5,Q59MQ0,A5E4A8,P11442,Q04439,P34092,Q02257,A3LYL7,A8N2Y6,Q2HDI2,Q6CVE9,P22137,Q9Y7Z8,P29742,P30998,P26233,P10569,Q6FN18,B6V8E6,Q758Q9,P14923,A8PWF6,Q02453,Q8WNW3,P16112,Q17GS9,P70618,O00160,A5DKH0,Q02248,Q7Z8J6,Q9GM70,Q92002,A7TDZ8,E9Q634,P22467,P46735,Q8SPJ1,Q0CEX5,Q0WLB5,P34109,P25870,Q12965,A1DBH2,Q2RBN7,Q0WNJ6,P36006,Q68FD5,P0CP01,Q6BUQ2,A2R5J1,P0CP00,…
GO:0006607	biological_process	NLS-bearing protein import into nucleus	7.19e-05	6	6.11e-05	5	-0.232814	0.79	1	7.54e-05	6.58e-05	-0.195243	0.808	1	0.956	ESQSPNTEVQR,ADNEDDEAVPDSEQDIRPR,YIMQNALSSDYR,SGFLPYAEPVFQR	ESQSPNTEVQR,QFVDLVPGIVQAVR	lcl|c239392_g1_i1|m.25726,lcl|c232587_g1_i15|m.17560	lcl|c239392_g1_i1|m.25726,lcl|c232587_g1_i15|m.17560	Q8H0U4,Q3SYU7,O14089,Q8BIV3,Q8BFY9,O00410,O60518,Q8BKC5,Q99LG2,B8ARW2,B9FDR3,Q92973,O14787	Q8H0U4,Q3SYU7,O14089,Q8BIV3,Q8BFY9,O00410,O60518,Q8BKC5,Q99LG2,B8ARW2,B9FDR3,Q92973,O14787
GO:2000124	biological_process	regulation of endocannabinoid signaling pathway	0	0	1.22e-05	1	null	0.312	1	1.08e-05	2.19e-05	1.02715	0.553	1	0.892		QVVSGENSFTNANGK		lcl|c238295_g3_i1|m.24347		Q99685
GO:2000121	biological_process	regulation of removal of superoxide radicals	0.00097	81	0.00127181	104	0.39081	0.0666	1	0.000883	0.00115233	0.383843	0.07	1	0.439	QIAVALCEAISPTGV,QGPFDAVILPGGLGGTQNLAQSAK,EILQEQEK,VKEILQEQEK,TVIGGLTGSDPVSCSR,QGPFDAVILPGGLGGTQNLAQ,SVVVKPDMSLEDAIK	QGPFDAVILPGGLGGTQNLAQSAK,EILQEQEK,VKEILQEQEK,TVIGGLTGSDPVSCS,TVIGGLTGSDPVSCSR,SVVVKPDMSLEDAIK	lcl|c226414_g3_i1|m.11460,lcl|c223266_g1_i3|m.8987	lcl|c226414_g3_i1|m.11460	Q5E946,P30793	Q5E946
GO:0035147	biological_process	branch fusion, open tracheal system	0.000383	32	0.000489	40	0.352149	0.302	1	0.000355	0.00045	0.340308	0.312	1	0.846	QDVYAEQLAAIPQFSK,SAALQEAR,FGGIEALVR,ITDSTMLQGIER,VILENAAVR,ALNNSSDAETTR,AAAVTSLAK,LPEDDSSVTCTFTNTLK,TVPLATTPMQDQVVKPGKPAIETPSAPTK,TFNETPINPR,LAEPSLMLK,AAAPVAATR,TGNESSVDR	QDVYAEQLAAIPQFSK,SAALQEAR,VILENAAVR,ALNNSSDAETTR,AAAVTSLAK,LPEDDSSVTCTFTNTLK,SIATLAITTLLK,QIIDYLGMQPCER,TVPLATTPMQDQVVKPGKPAIETPSAPTK,SGGIPALVR,TFNETPINPR,AAAPVAATR,TGNESSVDR	lcl|c236239_g1_i2|m.21882,lcl|c241349_g1_i1|m.28471,lcl|c236239_g1_i8|m.21884,lcl|c236239_g1_i4|m.21883	lcl|c236239_g1_i2|m.21882,lcl|c241349_g1_i1|m.28471,lcl|c236239_g1_i8|m.21884,lcl|c236239_g1_i4|m.21883	P53620,Q54HL0,Q9QZE5,Q9UBF2,Q6Z382,Q29I35,Q0VCX4,D4ABY2,Q9I8E6,Q02257,Q7PVF6,Q9PUE4,Q66JI9,P30998,Q9Y678,P26233,Q6P0K8,Q9WU82,Q0WW26,B6V8E6,P14923,P35224,Q4AEF8,P35223,P35222,Q02453,A2VE21,Q8WNW3,Q29AE5,Q6DKD7,Q22498,Q8I0G5,P18824,Q17GS9,Q9QXK3,Q02248,Q8H852,F1QGH7,Q7QHW5,Q8SPJ1	P53620,Q54HL0,Q9QZE5,Q9UBF2,Q6Z382,Q29I35,Q0VCX4,D4ABY2,Q9I8E6,Q02257,Q7PVF6,Q9PUE4,Q66JI9,P30998,Q9Y678,P26233,Q6P0K8,Q9WU82,Q0WW26,B6V8E6,P14923,P35224,Q4AEF8,P35223,P35222,Q02453,A2VE21,Q8WNW3,Q29AE5,Q6DKD7,Q22498,Q8I0G5,P18824,Q17GS9,Q9QXK3,Q02248,Q8H852,F1QGH7,Q7QHW5,Q8SPJ1
GO:0035148	biological_process	tube formation	0.00119755	100	0.00129627	106	0.114285	0.57	1	0.00108776	0.00117428	0.110405	0.581	1	0.897	QDVYAEQLAAIPQFSK,SDSTVYIK,SAALQEAR,ITDSTMLQGIER,VILENAAVR,LPEDDSSVTCTFTNTLK,TSTQTDVLK,TQDEEVGDGTTSVII,DGTPFVTTR,VEVMGFVR,TVPLATTPMQDQVVKPGKPAIETPSAPTK,TFNETPINPR,ATEEQQGTQSVR,VYVLVNER,AAAPVAATR,EGSQSGAAPTTPAED,DGSSVTTDSR,TLIQNCGANTIR,SMIEISR,TGNESSVDR,TAIETAMLLLR,EVASEIR,MTVILPGMGLDQQR,NLQDAMNVTR,FGGIEALVR,ALNNSSDAETTR,AAAVTSLAK,VLSGVMLNK,SVAGVQQWPYK,EAAVAQAVANAK,VADFGLSR,DGENIQTDSLSR,EQISVPVDIEN…	QDVYAEQLAAIPQFSK,SDSTVYIK,IPVRPLTDNDGLVER,SAALQEAR,VILENAAVR,LPEDDSSVTCTFTNTLK,IVLLDCSLEYK,AAEEIGMLAR,TSTQTDVLK,TQDEEVGDGTTSVII,QIIDYLGMQPCER,DGTPFVTTR,EGETVYLDCETTSHPVAK,TVPLATTPMQDQVVKPGKPAIETPSAPTK,SGGIPALVR,TFNETPINPR,ATEEQQGTQSVR,VYVLVNER,AAAPVAATR,DGSSVTTDSR,QIEFNLDVQER,TGNESSVDR,TSDSGTYSCIADHPGGWTESAVAK,TAIETAMLLLR,EVASEIR,QAMDDMLDILR,TNDFPDR,NLQDAMNVTR,SGTEIIGK,ALNNSSDAETTR,AAAVTSLAK,AVDE…	lcl|c229132_g1_i4|m.13986,lcl|c242947_g1_i3|m.30437,lcl|c225457_g2_i2|m.10643,lcl|c216163_g1_i3|m.4416,lcl|c236239_g1_i2|m.21882,lcl|c235239_g6_i4|m.20736,lcl|c236174_g2_i5|m.21792,lcl|c236174_g2_i3|m.21789,lcl|c229132_g1_i2|m.13984,lcl|c216163_g1_i10|m.4415,lcl|c236239_g1_i4|m.21883,lcl|c236125_g1_i5|m.21737,lcl|c241349_g1_i1|m.28471,lcl|c236239_g1_i8|m.21884,lcl|c216422_g3_i2|m.4589,lcl|c236174…	lcl|c229132_g1_i4|m.13986,lcl|c232986_g1_i4|m.17993,lcl|c216163_g1_i3|m.4416,lcl|c242947_g1_i3|m.30437,lcl|c225457_g2_i2|m.10643,lcl|c236239_g1_i2|m.21882,lcl|c235239_g6_i4|m.20736,lcl|c222669_g8_i2|m.8513,lcl|c236174_g2_i5|m.21792,lcl|c236174_g2_i3|m.21789,lcl|c227572_g1_i7|m.12598,lcl|c229132_g1_i2|m.13984,lcl|c216163_g1_i10|m.4415,lcl|c227572_g1_i1|m.12593,lcl|c236239_g1_i4|m.21883,lcl|c224598…	Q9QZE5,Q9UBF2,Q6Z382,Q29I35,O75386,O00782,Q3T0K2,Q9Y4K3,Q02257,Q9I8E6,Q7TPD3,O88413,Q4R963,P48605,O88450,P50143,P30998,Q66JI9,P26233,Q9Y678,P28693,P10447,Q0WW26,B6V8E6,Q54TH8,P14923,Q9LKI7,Q02453,Q8WNW3,Q29AE5,Q4JIM5,Q17GS9,Q9QXK3,Q02248,Q5NVF9,P49368,Q8SPJ1,P53620,Q54HL0,Q0VCX4,D4ABY2,Q922D8,Q7PVF6,P00521,P00522,P42684,Q9N4J8,P00520,Q9PUE4,Q84WV1,Q92626,Q6P0K8,Q9WU82,P35224,P35223,O74341,Q4AEF8,…	Q9QZE5,Q14204,Q6Z382,Q29I35,O75386,M0R8U1,O00782,P38650,Q9C1M7,P48605,O88450,P50143,P30998,Q66JI9,Q9Y678,Q8R418,P28693,B6V8E6,P34036,Q02453,Q8WNW3,Q9P225,Q29AE5,Q8BKG3,P37276,P39057,Q17GS9,Q27802,Q9QXK3,Q5NVF9,E9Q8T7,P45444,P49368,P45443,Q9JHU4,Q8VHE6,P23098,Q9Z136,Q9SMH5,D4ABY2,Q9SMH3,Q8IVF4,Q9JJ79,P0C6F1,Q7PVF6,P42684,Q9P2D7,Q84WV1,Q63164,P35224,P35223,Q4AEF8,Q13308,P35222,P54408,A2VE21,P78716,…
GO:0035149	biological_process	lumen formation, open tracheal system	0.000551	46	0.000599	49	0.121369	0.682	1	0.000506	0.000549	0.116417	0.691	1	0.929	TAIETAMLLLR,QDVYAEQLAAIPQFSK,NLQDAMNVTR,SAALQEAR,ITDSTMLQGIER,VILENAAVR,AAAVTSLAK,VLSGVMLNK,SVAGVQQWPYK,LPEDDSSVTCTFTNTLK,TQDEEVGDGTTSVII,EQISVPVDIENREEMLK,TEELKEEDVGTGAGL,TVPLATTPMQDQVVKPGKPAIETPSAPTK,TFNETPINPR,DILNEVER,VQLGNVEAAK,AAAPVAATR,EGSQSGAAPTTPAED,TLIQNCGANTIR,SMIEISR,TGNESSVDR	TAIETAMLLLR,QDVYAEQLAAIPQFSK,QAMDDMLDILR,NLQDAMNVTR,SAALQEAR,VILENAAVR,AAAVTSLAK,VLSGVMLNK,SVAGVQQWPYK,LPEDDSSVTCTFTNTLK,IVLLDCSLEYK,TQDEEVGDGTTSVII,SIATLAITTLLK,QIIDYLGMQPCER,KVQLGNVEAAK,TVPLATTPMQDQVVKPGKPAIETPSAPTK,TFNETPINPR,DILNEVER,VQLGNVEAAK,AAAPVAATR,TGNESSVDR,LQSTASQVDDLK	lcl|c229132_g1_i4|m.13986,lcl|c236239_g1_i2|m.21882,lcl|c236239_g1_i8|m.21884,lcl|c229132_g1_i2|m.13984,lcl|c236239_g1_i4|m.21883	lcl|c229132_g1_i4|m.13986,lcl|c232986_g1_i4|m.17993,lcl|c236239_g1_i2|m.21882,lcl|c236239_g1_i8|m.21884,lcl|c229132_g1_i2|m.13984,lcl|c236239_g1_i4|m.21883	P53620,Q54HL0,Q9QZE5,Q9UBF2,Q6Z382,O00782,Q3T0K2,D4ABY2,Q9I8E6,Q7PVF6,Q4R963,Q9N4J8,Q9PUE4,P48605,P50143,Q66JI9,Q9Y678,Q84WV1,Q0WW26,Q54TH8,Q4AEF8,O74341,Q9LKI7,P54408,A2VE21,Q29AE5,Q6DKD7,Q22498,Q8I0G5,Q9QXK3,P39077,Q5NVF9,Q6P502,Q8H852,P49368,P80318	Q9QZE5,Q14204,Q9UBF2,Q6Z382,M0R8U1,Q69Z23,O00782,Q3T0K2,P38650,Q19020,Q9I8E6,Q9C1M7,Q4R963,P48605,Q9C0G6,Q19542,P50143,Q66JI9,Q9Y678,Q0WW26,Q27171,P34036,Q54TH8,Q9LKI7,Q9P225,Q29AE5,P37276,P39057,Q27802,Q9QXK3,Q5NVF9,E9Q8T7,P45444,P45443,Q9JHU4,P49368,Q8VHE6,Q9UFH2,P53620,Q54HL0,P23098,Q96DT5,Q9SMH5,D4ABY2,Q9SMH3,Q8IVF4,Q9JJ79,P0C6F1,Q7PVF6,Q8BW94,Q9N4J8,Q39575,Q9P2D7,Q9PUE4,Q39610,Q8TE73,Q84WV1,…
GO:0048490	biological_process	anterograde synaptic vesicle transport	5.99e-05	5	4.89e-05	4	-0.291707	0.763	1	6.46e-05	5.49e-05	-0.235885	0.787	1	0.944	FDLTVGPK,AIEDTIEDMLVR,NVDQVEESVATAER,GLNESSGELK,SEAGISAAPQR	NVDQVEESVATAER,GLNESSGELK,VMLVNNILQNAQER,SEAGISAAPQR	lcl|c213783_g1_i6|m.3206,lcl|c201793_g1_i1|m.1223,lcl|c213783_g1_i5|m.3205,lcl|c236282_g6_i1|m.21951,lcl|c213783_g1_i1|m.3203,lcl|c237643_g4_i5|m.23536	lcl|c201793_g1_i1|m.1223,lcl|c236282_g6_i1|m.21951,lcl|c207931_g1_i1|m.1711,lcl|c237643_g4_i5|m.23536	Q9NUP1,Q9JME5,Q92572,Q2YDH6,Q9Y2T2,Q9DCR2,Q5R478,P53677,P53678	Q9NUP1,Q9JME5,Q92572,Q2YDH6,O95295,Q9DCR2
GO:0035143	biological_process	caudal fin morphogenesis	3.59e-05	3	7.34e-05	6	1.03022	0.302	1	4.31e-05	7.68e-05	0.834505	0.349	1	0.862	DGPSVQSELLTR	DGPSVQSELLTR,YITLPFK,AEYGAILAR,FSYIVGSNAR	lcl|c241027_g2_i2|m.28089,lcl|c241027_g2_i3|m.28090,lcl|c241027_g2_i9|m.28096,lcl|c241027_g2_i4|m.28092,lcl|c241027_g2_i5|m.28094	lcl|c244194_g2_i1|m.31876,lcl|c241027_g2_i2|m.28089,lcl|c241027_g2_i3|m.28090,lcl|c241027_g2_i9|m.28096,lcl|c241027_g2_i4|m.28092,lcl|c241027_g2_i5|m.28094	Q9JLB4,Q8JI28,O57460	Q9JLB4,Q8JI28,O57460
GO:0060143	biological_process	positive regulation of syncytium formation by plasma membrane fusion	0.000228	19	0.000306	25	0.426149	0.33	1	0.000215	0.000285	0.405661	0.343	1	0.861	LTAEQALAHPY,LQNTVLGK,VINTPEVAR,TLFPGNDHIDQLT,MLANDIPR,TVWEVPNR,ADMVTTQQLMR,SLSSFGNAFLNR,ILDFGLAR	LTAEQALAHPY,NPQVFNSVVDGLR,VINTPEVAR,IWTLSDIDRDGQLDEEEF,TVWEVPNR,LDISDEFQR,ADMVTTQQLMR,SLSSFGNAFLNR,ILDFGLAR,MAEEEMTGYVATR,VFIGSFWDQPLQNDENR,MLANDIPR,MLDLDSDNR	lcl|c221440_g2_i5|m.7632,lcl|c221440_g2_i2|m.7631,lcl|c224463_g4_i7|m.9834,lcl|c239887_g1_i1|m.26471,lcl|c224463_g4_i2|m.9831	lcl|c221440_g2_i5|m.7632,lcl|c221440_g2_i2|m.7631,lcl|c224463_g4_i7|m.9834,lcl|c239887_g1_i1|m.26471,lcl|c224463_g4_i2|m.9831	Q8BH64,Q4V8H8,Q9EQP2,Q9QXY6,Q9H223,Q5RBP4,Q8R491,Q9WVK4,P70618,Q641Z6,Q9NZN3,Q5E9R3,Q9NZN4,Q9GM70,P47812,Q9H4M9,P47811	Q8BH64,Q4V8H8,Q9EQP2,Q9QXY6,Q9H223,Q5RBP4,Q8R491,Q9WVK4,P70618,Q641Z6,Q9NZN3,Q5E9R3,Q9NZN4,Q9GM70,P47812,Q9H4M9,P47811
GO:0061475	biological_process	cytosolic valyl-tRNA aminoacylation	0.000299	25	0.000367	30	0.293255	0.452	1	0.00028	0.00034	0.280906	0.463	1	0.892	VPENVQQQNTEK,SLGNVIDPIDVINGV,EAALAENQNQK,TLLPVPGYEH,QELIGNESLEDR,DINLDVLR,QLETELAK,FALSGLGSDFSPKPR,QLENSNLDPR	VPENVQQQNTEK,SLGNVIDPIDVINGV,EAALAENQNQK,VETMLGDTAIAVHPDDAR,QELIGNESLEDR,DINLDVLR,QLETELAK,QLENSNLDPR	lcl|c237578_g2_i2|m.23441,lcl|c237578_g2_i8|m.23444	lcl|c237578_g2_i2|m.23441,lcl|c237578_g2_i4|m.23443,lcl|c237578_g2_i8|m.23444	B4SJ70,Q8XJ42,Q9U1Q4,Q3YU91,Q54I78,Q8XX80,Q4QKA4,P57447,Q5NLA8,Q606C1,P43834,Q62KW5,Q0VSA8,Q328S3,Q88P76,B0RVI4,Q74BJ6,Q5QY15,Q5NHZ4,P07118,Q5WYI0,Q488M6,Q6MQK8,Q5X728,Q48MF2,Q887M3,Q8RBN5,A6Q3R4,Q6DA54,Q7TUI9,Q6F8F0,F4KE63,Q3SL86,Q4KHT9,Q98LB1,Q66F11,Q4UQP3,B0USP0,Q83DD0,P26640,O75005,Q9CMK5,Q7WHM6,Q8EBS5,C1D6J9,Q72E47,Q04462,Q65GK8,Q5TM74,Q9X2D7,Q47BG6,Q3A253,Q767M3,Q8SS27,Q01PF1,Q83IM5,B0U1L1,…	B4SJ70,Q8XJ42,Q9U1Q4,Q3YU91,Q54I78,Q8XX80,Q4QKA4,P57447,Q5NLA8,Q606C1,P43834,Q62KW5,Q0VSA8,Q328S3,Q88P76,B0RVI4,Q74BJ6,Q5QY15,Q5NHZ4,P07118,Q5WYI0,Q488M6,Q6MQK8,Q5X728,Q48MF2,Q887M3,Q8RBN5,A6Q3R4,Q6DA54,Q7TUI9,Q6F8F0,F4KE63,Q3SL86,Q4KHT9,Q98LB1,Q66F11,Q4UQP3,B0USP0,Q83DD0,P26640,O75005,Q9CMK5,Q7WHM6,Q8EBS5,C1D6J9,Q72E47,Q04462,Q65GK8,Q5TM74,Q9X2D7,Q47BG6,Q3A253,Q767M3,Q8SS27,Q01PF1,Q83IM5,B0U1L1,…
GO:0061476	biological_process	response to anticoagulant	0.00123347	103	0.00108838	89	-0.180546	0.387	1	0.00112007	0.000988	-0.181437	0.382	1	0.886	YESVNAVTK,GIDDLDFYIGDEALDK,ERETGIPPEQSMETAK,ADYDEHGPSICR,WGYICPDIAK,NIVLSGGSTMFR,QPAAVIDNGTGYTK,DITFFVQQLLR,TLTGTVIDSGDGVTHVIPV,KYESVNAVTK,MGFAGNTEPQYIVPTAIGIK,ETGIPPEQSMETAK,YEAEPAK,LSEQLSAGR	YESVNAVTK,GIDDLDFYIGDEALDK,ERETGIPPEQSMETAK,TNDFPDR,ADYDEHGPSICR,WGYICPDIAK,NIVLSGGSTMFR,QPAAVIDNGTGYTK,DITFFVQQLLR,TLTGTVIDSGDGVTHVIPV,KYESVNAVTK,MGFAGNTEPQYIVPTAIGIK,ETGIPPEQSMETAK,YEAEPAK,LSEQLSAGR,FLGPEIFFHPEF	lcl|c240857_g5_i1|m.27819	lcl|c228623_g7_i1|m.13472,lcl|c240857_g5_i1|m.27819	O73723,Q5R8R1,A0A1L8EV45,Q61WW9,Q4V7C7,Q9P1U1,Q90WD0,Q641P0,Q801P7,Q99JY9,P32392,Q9N4I0,P61158,P61157	O73723,Q5R8R1,A0A1L8EV45,Q61WW9,Q4V7C7,Q9P1U1,Q90WD0,Q641P0,Q801P7,Q99JY9,P32392,Q9N4I0,P61158,Q8C4U3,P61157
GO:0035146	biological_process	tube fusion	0.000383	32	0.000489	40	0.352149	0.302	1	0.000355	0.00045	0.340308	0.312	1	0.846	QDVYAEQLAAIPQFSK,SAALQEAR,FGGIEALVR,ITDSTMLQGIER,VILENAAVR,ALNNSSDAETTR,AAAVTSLAK,LPEDDSSVTCTFTNTLK,TVPLATTPMQDQVVKPGKPAIETPSAPTK,TFNETPINPR,LAEPSLMLK,AAAPVAATR,TGNESSVDR	QDVYAEQLAAIPQFSK,SAALQEAR,VILENAAVR,ALNNSSDAETTR,AAAVTSLAK,LPEDDSSVTCTFTNTLK,SIATLAITTLLK,QIIDYLGMQPCER,TVPLATTPMQDQVVKPGKPAIETPSAPTK,SGGIPALVR,TFNETPINPR,AAAPVAATR,TGNESSVDR	lcl|c236239_g1_i2|m.21882,lcl|c241349_g1_i1|m.28471,lcl|c236239_g1_i8|m.21884,lcl|c236239_g1_i4|m.21883	lcl|c236239_g1_i2|m.21882,lcl|c241349_g1_i1|m.28471,lcl|c236239_g1_i8|m.21884,lcl|c236239_g1_i4|m.21883	P53620,Q54HL0,Q9QZE5,Q9UBF2,Q6Z382,Q29I35,Q0VCX4,D4ABY2,Q9I8E6,Q02257,Q7PVF6,Q9PUE4,Q66JI9,P30998,Q9Y678,P26233,Q6P0K8,Q9WU82,Q0WW26,B6V8E6,P14923,P35224,Q4AEF8,P35223,P35222,Q02453,A2VE21,Q8WNW3,Q29AE5,Q6DKD7,Q22498,Q8I0G5,P18824,Q17GS9,Q9QXK3,Q02248,Q8H852,F1QGH7,Q7QHW5,Q8SPJ1	P53620,Q54HL0,Q9QZE5,Q9UBF2,Q6Z382,Q29I35,Q0VCX4,D4ABY2,Q9I8E6,Q02257,Q7PVF6,Q9PUE4,Q66JI9,P30998,Q9Y678,P26233,Q6P0K8,Q9WU82,Q0WW26,B6V8E6,P14923,P35224,Q4AEF8,P35223,P35222,Q02453,A2VE21,Q8WNW3,Q29AE5,Q6DKD7,Q22498,Q8I0G5,P18824,Q17GS9,Q9QXK3,Q02248,Q8H852,F1QGH7,Q7QHW5,Q8SPJ1
GO:2000142	biological_process	regulation of DNA-templated transcription, initiation	0.000874	73	0.000978	80	0.162324	0.487	1	0.000797	0.000889	0.157546	0.497	1	0.892	DEDDFSFPIADK,LIFSTITAK,FGGIEALVR,AVASQLDANFLK,GVLLYGPPGTGK,TMLELINQLDGFDPR,ALNNSSDAETTR,AMEVDERPTEQ,VQEEYIKDEQK,DYVIEEDFMK,EVIELPLTNPELFQR,FENLGIAPPK,AMEVDERPTEQY,VIMATNR,VKQEPTQSSSR,LENLGIPEEELLR,ALQSVGQIVGEVLR,LEGGSGGDSEVQR,LAGPQLVQMFIGDGAK,LAEPSLMLK,FDDGAGGDNEVQR,FDAQTGADR,FITDSTVEER,MNVSPDVNFDELSR	LIFSTITAK,ILSTIDR,FVVDLDK,LQQEGSR,DYVIEEDFMK,FENLGIAPPK,VVGSEFVQK,SGGIPALVR,ALQSVGQIVGEVLR,LEGGSGGDSEVQR,FDDGAGGDNEVQR,AVASQLDANFLK,GVLLYGPPGTGK,ALNNSSDAETTR,EVIELPLTNPELFQR,HGDIDYEAVVK,AMEVDERPTEQY,ILLELLNQMDGFDQNVNVK,VIMATNR,LSDGFNGADLR,KIELPNPDQEAR,LAGPQLVQMFIGDGAK,KADGTPDGR,FDAQTGADR,VPDSTYEMVGGLDK,FITDSTVEER	lcl|c222581_g2_i12|m.8452,lcl|c222581_g2_i12|m.8451,lcl|c210819_g1_i13|m.2279,lcl|c204019_g3_i1|m.1367,lcl|c216194_g2_i1|m.4425,lcl|c226065_g5_i2|m.11164,lcl|c227279_g1_i4|m.12295,lcl|c226065_g5_i1|m.11162,lcl|c241349_g1_i1|m.28471,lcl|c217405_g1_i6|m.5180,lcl|c223433_g6_i1|m.9115,lcl|c204019_g1_i1|m.1366,lcl|c227794_g1_i1|m.12770	lcl|c222581_g2_i12|m.8452,lcl|c222581_g2_i12|m.8451,lcl|c204019_g3_i1|m.1367,lcl|c241349_g1_i1|m.28471,lcl|c217405_g1_i6|m.5180,lcl|c223433_g6_i1|m.9115,lcl|c204019_g1_i1|m.1366,lcl|c216194_g2_i1|m.4425,lcl|c217405_g1_i3|m.5179,lcl|c227794_g1_i1|m.12770,lcl|c217405_g1_i3|m.5177	P54775,Q2KIW6,P46470,O42587,Q29I35,Q5E9F9,Q63570,P54814,F4JY24,P62198,Q24368,P46507,P62194,Q02257,Q3T030,Q9MAK9,P62195,P62196,P62197,Q91WV0,P30998,P26233,Q9C5U3,Q6PGB8,B6V8E6,P28370,P14923,Q08874,Q02453,Q8WNW3,O17071,Q17GS9,Q02248,O88368,O88685,Q5XI68,Q91ZW3,Q8SPJ1,P35998,Q0VCX4,P62333,O60264,Q5ZMV3,P41877,P62334,P62335,Q63569,Q94BQ2,Q6P0K8,Q9WU82,Q9SEI3,P35224,P35223,P17980,P35222,Q08773,O75030,…	P54775,Q2KIW6,P46470,O42587,Q29I35,Q5E9F9,Q63570,P54814,F4JY24,P62198,Q24368,P46507,P62194,Q9MAK9,Q02257,P62195,Q3T030,P62196,P62197,P30998,P26233,Q9C5U3,Q6PGB8,B6V8E6,P28370,P14923,Q02453,Q8WNW3,O17071,Q17GS9,Q02248,O88685,Q91ZW3,Q8SPJ1,P35998,Q0VCX4,P62333,O60264,P62334,P41877,P62335,Q63569,Q94BQ2,Q6P0K8,Q9WU82,Q9SEI3,P35224,P35223,P17980,P35222,Q08773,P38144,Q7G8Y3,Q8RWY3,P18824,Q4R7L3,Q5A310,…
GO:0036471	biological_process	cellular response to glyoxal	0.000958	80	0.00127181	104	0.408732	0.0558	1	0.000872	0.00115233	0.401545	0.0589	1	0.4	QGPFDAVILPGGLGGTQNLAQSAK,EILQEQEK,VKEILQEQEK,TVIGGLTGSDPVSCSR,QGPFDAVILPGGLGGTQNLAQ,SVVVKPDMSLEDAIK	QGPFDAVILPGGLGGTQNLAQSAK,EILQEQEK,VKEILQEQEK,TVIGGLTGSDPVSCS,TVIGGLTGSDPVSCSR,SVVVKPDMSLEDAIK	lcl|c226414_g3_i1|m.11460	lcl|c226414_g3_i1|m.11460	Q5E946	Q5E946
GO:0035141	biological_process	medial fin morphogenesis	3.59e-05	3	7.34e-05	6	1.03022	0.302	1	4.31e-05	7.68e-05	0.834505	0.349	1	0.862	DGPSVQSELLTR	DGPSVQSELLTR,YITLPFK,AEYGAILAR,FSYIVGSNAR	lcl|c241027_g2_i2|m.28089,lcl|c241027_g2_i3|m.28090,lcl|c241027_g2_i9|m.28096,lcl|c241027_g2_i4|m.28092,lcl|c241027_g2_i5|m.28094	lcl|c244194_g2_i1|m.31876,lcl|c241027_g2_i2|m.28089,lcl|c241027_g2_i3|m.28090,lcl|c241027_g2_i9|m.28096,lcl|c241027_g2_i4|m.28092,lcl|c241027_g2_i5|m.28094	Q9JLB4,Q8JI28,O57460	Q9JLB4,Q8JI28,O57460
GO:0060142	biological_process	regulation of syncytium formation by plasma membrane fusion	0.0011736	98	0.000905	74	-0.375036	0.0903	1	0.00106622	0.000823	-0.373388	0.0898	1	0.507	LTAEQALAHPY,VINTPEVAR,SAIGEGMTR,TLFPGNDHIDQLT,GLNVPALGPK,TVWEVPNR,QVYPPINVLPSLSR,ADMVTTQQLMR,SLSSFGNAFLNR,NYISQPR,ILDFGLAR,IPQSILAEYYPR,LQNTVLGK,AVVGEEALTSEDLL,QVYPPINVLPSLS,IYPEEMIQTGISAIDTMNSIAR,MLANDIPR,TVSGVNGPLVILDDVK,SGQVLEVSGSK,AVVQVFEGTSGIDAK,NFISQGTYENR,TPVSSDMLGR	NPQVFNSVVDGLR,GLNVPALGPK,ADMVTTQQLMR,NYISQPR,IPQSILAEYYPR,SLSSFGNAFLNR,VFIGSFWDQPLQNDENR,QVYPPINVLPSLS,TVSGVNGPLVILDDVK,SGQVLEVSGSK,AVVQVFEGTSGIDAK,TPVSSDMLGR,LTAEQALAHPY,VINTPEVAR,SAIGEGMTR,ADPNHSLGPAIK,IWTLSDIDRDGQLDEEEF,TVWEVPNR,LDISDEFQR,QVYPPINVLPSLSR,ILDFGLAR,MAEEEMTGYVATR,IYPEEMIQTGISAIDTMNSIAR,MLANDIPR,MLDLDSDNR	lcl|c221440_g2_i5|m.7632,lcl|c221440_g2_i2|m.7631,lcl|c224463_g4_i7|m.9834,lcl|c239887_g1_i1|m.26471,lcl|c224463_g4_i2|m.9831,lcl|c221666_g1_i2|m.7778,lcl|c238903_g3_i2|m.25053,lcl|c221666_g1_i3|m.7779	lcl|c221440_g2_i5|m.7632,lcl|c221440_g2_i2|m.7631,lcl|c224463_g4_i7|m.9834,lcl|c239887_g1_i1|m.26471,lcl|c224463_g4_i2|m.9831,lcl|c221666_g1_i2|m.7778,lcl|c221666_g1_i3|m.7779,lcl|c238903_g3_i2|m.25053	Q5R6R2,Q76NU1,P14318,P31410,P31411,Q641Z6,P16140,P31407,Q19626,P31409,P31408,Q4V8H8,Q43433,Q4R5J4,P31401,Q43432,P11574,Q8R491,Q619C0,P70618,Q9GM70,Q9UI15,P62815,Q9H223,Q40079,Q40078,Q5R5V5,Q9SZN1,Q5RBP4,P11593,P49712,Q38681,Q38680,P22550,P62814,P47812,P47811,P37805,Q8BH64,P21281,Q8W4E2,Q25691,Q59PT0,Q9EQP2,Q9QXY6,P15313,Q9R1Q8,Q26976,Q8SR34,Q9WVK4,P48413,Q9NZN3,Q5E9R3,Q9NZN4,Q9H4M9	Q5R6R2,Q76NU1,P14318,P31410,P31411,Q641Z6,P16140,P31407,Q19626,P31409,P31408,Q4V8H8,Q43433,Q4R5J4,P31401,Q43432,P11574,Q8R491,Q619C0,P70618,Q9GM70,Q9UI15,P62815,Q9H223,Q40079,Q40078,Q5R5V5,Q9SZN1,Q5RBP4,P11593,P49712,Q38681,Q38680,P22550,P62814,P47812,P47811,P37805,Q8BH64,P21281,Q8W4E2,Q25691,Q59PT0,Q9EQP2,Q9QXY6,P15313,Q9R1Q8,Q26976,Q8SR34,Q9WVK4,P48413,Q9NZN3,Q5E9R3,Q9NZN4,Q9H4M9
GO:1902579	biological_process	multi-organism localization	0.00332918	278	0.00347303	284	0.0610268	0.615	1	0.00300481	0.00312774	0.0578465	0.633	1	0.909	AEFQEQSSK,EGIPPDQQR,DVQEVFR,TLSDYNIQK,MLEQLDMR,LSGGDSNESR,TELTSQSK,ELAFQISK,ELENANDLLAAAR,LQLWDIAGQER,LNELTEANK,QLQAAQEEK,TQSEVDSQTAAQHAEIMEK,LDEIESQETSLK,QLISCNSK,TQVDEQTK,LNEAEQEISQYK,FVTGGCDNLVK,LQNQVNGSEWSWK,EGENAIDSLQK,SSSSIILR,NPTNTDTSR,ESADETVR,ASDELTDEQVR,AGVLEPSISK,SIEEMQQQNQK,SAELQTVPNTEK,VNESEQQEGAGK,TLAVNAAQDSADLVAK,LSEANSVK,LGSQVDTLQR,IQDKEGIPPDQQR,IDDILNSEPGILK,TEEVNEK,TSSDAGSPSQEAK…	AYHNTSQINTER,TSPVSVPISPER,EGIPPDQQR,DVQEVFR,TLSDYNIQK,ELAFQISK,ELENANDLLAAAR,LQLWDIAGQER,LNELTEANK,QLQAAQEEK,LDEIESQETSLK,TQVDEQTK,FVTGGCDNLVK,LQNQVNGSEWSWK,EGENAIDSLQK,SSSSIILR,NPTNTDTSR,ASDELTDEQVR,AGVLEPSISK,NSGISPLTTEDMTSAFEK,SIEEMQQQNQK,VNESEQQEGAGK,TLAVNAAQDSADLVAK,EGAVDTGDER,LSEANSVK,DLMDTMNSLSNLPEDFEGK,LGSQVDTLQR,LESQNIELNGTNAR,IQDKEGIPPDQQR,TSSDAGSPSQEAK,IALDQEAK,IQDKEGIPPDQQ,VNAEQQFSQIE…	lcl|c237638_g1_i10|m.23524,sp|RS27A_HUMAN|,lcl|c221441_g1_i7|m.7635,lcl|c223432_g3_i4|m.9112,lcl|c238692_g2_i2|m.24838,lcl|c241269_g1_i2|m.28376,lcl|c221441_g1_i5|m.7633,lcl|c220629_g1_i5|m.7042,lcl|c220629_g1_i6|m.7044,lcl|c220629_g1_i4|m.7040,lcl|c225753_g2_i5|m.10911,lcl|c220629_g1_i3|m.7038,lcl|c222200_g1_i1|m.8165,lcl|c220629_g1_i1|m.7036,lcl|c237638_g1_i15|m.23528,lcl|c223432_g3_i1|m.9111,l…	lcl|c237638_g1_i10|m.23524,lcl|c227180_g1_i4|m.12217,lcl|c227180_g1_i2|m.12216,sp|RS27A_HUMAN|,lcl|c221441_g1_i7|m.7635,lcl|c223432_g3_i4|m.9112,lcl|c238692_g2_i2|m.24838,lcl|c241269_g1_i2|m.28376,lcl|c221441_g1_i5|m.7633,lcl|c220629_g1_i5|m.7042,lcl|c220629_g1_i6|m.7044,lcl|c225753_g2_i5|m.10911,lcl|c220629_g1_i3|m.7038,lcl|c222200_g1_i1|m.8165,lcl|c237638_g1_i15|m.23528,lcl|c220629_g1_i1|m.7036…	Q9SMV6,Q63413,P30822,Q9Z1N5,Q55BM4,Q13637,O94501,Q32L40,P28480,Q96E17,P11983,P12613,Q4R5G2,Q54EV7,P12612,Q6P5F9,Q9TVM2,P35658,F6ZDS4,Q9XT06,P14068,P62992,P17987,Q63481,F1MA98,Q9UK41,Q94757,P62978,P62979,Q9W790,P79781,Q13769,O14980,O15891,Q5EE04,P18279,Q80U96,P55735,F4IZR5,Q9D1C8,Q5WR10,B5DEN9,P12270,P28769,Q6NY52,P41988	Q9SMV6,Q63413,Q9Z1N5,Q13637,O94501,P28480,P12613,Q4R5G2,P12612,Q6P5F9,Q9TVM2,P35658,F6ZDS4,Q9XT06,P62992,P17987,F1MA98,Q9UK41,Q94757,Q9N181,Q13769,O15891,F4IZR5,B5DEN9,P12270,P28769,P30822,Q55BM4,Q32L40,Q96E17,P11983,Q54EV7,P14068,Q63481,P62978,P62979,Q9W790,P79781,O14980,Q5RAF3,Q5EE04,P18279,Q80U96,P55735,Q9D1C8,Q5WR10,O60551,Q6NY52,P41988
GO:0060147	biological_process	regulation of posttranscriptional gene silencing	0.00119755	100	0.00125958	103	0.0728651	0.719	1	0.00108776	0.00114135	0.0693779	0.731	1	0.935	AEFQEQSSK,EHPNVQN,TELTSQSK,AGPNDPVCK,ELENANDLLAAAR,SLPSSSASK,LNELTEANK,WDLDALPK,TQSEVDSQTAAQHAEIMEK,LDEIESQETSLK,QLISCNSK,TQVDEQTK,LNEAEQEISQYK,FVTGGCDNLVK,EGENAIDSLQK,NPTNTDTSR,ESADETVR,NVIVNYIPPDITEVR,NAQSSSGGGSFNR,SIEEMQQQNQK,SAELQTVPNTEK,VNESEQQEGAGK,DLVGIAQTGSGK,GIVEEDTEESNR,EANQHVNPK,LSEANSVK,TGLDLTAEWK,ILTLESGESR,LGSQVDTLQR,SKQEGVSQGK,EGFQQPTVIQAQGWPVALSGR,IDDILNSEPGILK,TEEVNEK,IEGDEGGVDAP…	GVEICIATPGR,TSPVSVPISPER,ANIQQSNR,GNAPILVATDVASR,SSHNGGGSNNTTSYPST,AGPNDPVCK,ELENANDLLAAAR,SLPSSSASK,LNELTEANK,WDLDALPK,LDEIESQETSLK,TQVDEQTK,FVTGGCDNLVK,YLHLSNNEEK,SFGNLGEK,EGENAIDSLQK,NPTNTDTSR,LGLIPLISDDVVDR,NAQSSSGGGSFNR,SIEEMQQQNQK,VNESEQQEGAGK,DLVGIAQTGSGK,EGAVDTGDER,GIVEEDTEESNR,LMSLAEQAK,LSEANSVK,TGLDLTAEWK,STCIYGGAPK,ILTLESGESR,LGSQVDTLQR,SKQEGVSQGK,GGEIPAPSCSPK,EGFQQPTVIQAQGWPVALSGR,LES…	lcl|c239419_g1_i1|m.25763,lcl|c239893_g3_i11|m.26489,lcl|c221840_g3_i5|m.7911,lcl|c221840_g3_i2|m.7908,lcl|c223941_g1_i2|m.9485,lcl|c238692_g2_i2|m.24838,lcl|c217917_g2_i1|m.5431,lcl|c217917_g2_i2|m.5433,lcl|c222323_g2_i2|m.8245,lcl|c222200_g1_i1|m.8165,lcl|c225755_g1_i1|m.10912,lcl|c210635_g1_i1|m.2219,lcl|c223941_g1_i4|m.9486,lcl|c239893_g3_i3|m.26499,lcl|c239893_g3_i1|m.26482,lcl|c239419_g1_i1…	lcl|c239419_g1_i1|m.25763,lcl|c239893_g3_i11|m.26489,lcl|c221840_g3_i5|m.7911,lcl|c221840_g3_i2|m.7908,lcl|c238692_g2_i2|m.24838,lcl|c223941_g1_i2|m.9485,lcl|c217917_g2_i1|m.5431,lcl|c217917_g2_i2|m.5433,lcl|c222323_g2_i2|m.8245,lcl|c222200_g1_i1|m.8165,lcl|c225755_g1_i1|m.10912,lcl|c210635_g1_i1|m.2219,lcl|c223941_g1_i4|m.9486,lcl|c239893_g3_i3|m.26499,lcl|c239893_g3_i1|m.26482,lcl|c214418_g2_i7…	Q61656,Q4X195,Q501J6,Q15717,P35658,Q62167,F6ZDS4,P52434,Q6DCX2,Q6GLC9,P17844,G0SFM2,Q6DJB9,Q4R6M5,F1MA98,Q8CJG0,Q96K80,P51113,A5A6J2,Q923G2,P11414,Q9QZ81,Q5EE04,P55735,P24928,E7FAM5,Q2U070,P12270,Q92841,O15523,Q5R4I9,P08775	Q61656,Q4X195,Q501J6,Q15717,P35658,Q62167,F6ZDS4,P52434,Q6DCX2,Q6GLC9,P17844,G0SFM2,Q6DJB9,Q4R6M5,F1MA98,Q8CJG0,Q96K80,P51113,A5A6J2,Q923G2,P19387,P11414,Q9QZ81,Q5EE04,P55735,P24928,E7FAM5,Q2U070,P12270,Q92841,O15523,Q5R4I9,P08775
GO:0061478	biological_process	response to platelet aggregation inhibitor	1.2e-05	1	1.22e-05	1	0.0302207	0.988	1	2.15e-05	2.19e-05	0.0271497	0.985	1	0.992	LGCQILVTK	TVTAELLR	lcl|c240035_g1_i1|m.26689	lcl|c242539_g3_i10|m.29919	P10109	P35869
GO:0060148	biological_process	positive regulation of posttranscriptional gene silencing	0.000419	35	0.00055	45	0.392791	0.225	1	0.000388	0.000505	0.380787	0.234	1	0.8	EHPNVQN,DLVGIAQTGSGK,GIVEEDTEESNR,EANQHVNPK,SKQEGVSQGK,EGFQQPTVIQAQGWPVALSGR,SLPSSSASK,SLIFTETK,WDLDALPK,TGTSYTFFTTGNAK,MLDMGFEPQIR,SELSVSGR,ELAQQVQAVSSQYGR,NAQSSSGGGSFNR	GVEICIATPGR,DLVGIAQTGSGK,ANIQQSNR,GIVEEDTEESNR,GNAPILVATDVASR,LMSLAEQAK,STCIYGGAPK,SKQEGVSQGK,GGEIPAPSCSPK,EGFQQPTVIQAQGWPVALSGR,LLEEIMGEAENK,SLPSSSASK,WDLDALPK,TIIEQIRPDR,TGTSYTFFTTGNAK,MLDMGFEPQIR,SELSVSGR,ELAQQVQAVSSQYGR,NAQSSSGGGSFNR	lcl|c239419_g1_i1|m.25763,lcl|c223941_g1_i4|m.9486,lcl|c221840_g3_i5|m.7911,lcl|c221840_g3_i2|m.7908,lcl|c223941_g1_i2|m.9485,lcl|c217917_g2_i1|m.5431,lcl|c217917_g2_i2|m.5433,lcl|c239419_g1_i10|m.25764	lcl|c239419_g1_i1|m.25763,lcl|c223941_g1_i4|m.9486,lcl|c221840_g3_i5|m.7911,lcl|c221840_g3_i2|m.7908,lcl|c223941_g1_i2|m.9485,lcl|c217917_g2_i1|m.5431,lcl|c217917_g2_i2|m.5433,lcl|c239419_g1_i10|m.25764	P51113,Q61656,A5A6J2,Q4X195,Q501J6,Q9QZ81,Q62167,Q6DCX2,Q6GLC9,P17844,G0SFM2,Q6DJB9,Q4R6M5,Q2U070,Q92841,O15523,Q8CJG0,Q5R4I9	P51113,Q61656,A5A6J2,Q4X195,Q501J6,Q9QZ81,Q62167,Q6DCX2,Q6GLC9,P17844,G0SFM2,Q6DJB9,Q4R6M5,Q2U070,Q92841,O15523,Q8CJG0,Q5R4I9
GO:0060149	biological_process	negative regulation of posttranscriptional gene silencing	0.000168	14	0.000171	14	0.0302207	0.956	1	0.000162	0.000165	0.0271497	0.959	1	0.992	ILTLESGESR,ATNEVLLEQNAK,AGPNDPVCK,NVIVNYIPPDITEVR,HVFEDGPDSDYGGY	YLHLSNNEEK,ILTLESGESR,ATNEVLLEQNAK,AGPNDPVCK,SSHNGGGSNNTTSYPST	lcl|c225755_g1_i1|m.10912,lcl|c222323_g2_i2|m.8245	lcl|c225755_g1_i1|m.10912,lcl|c222323_g2_i2|m.8245	Q96K80,Q15717	Q96K80,Q15717
GO:0098712	biological_process	L-glutamate import across plasma membrane	4.79e-05	4	0.000122	10	1.35215	0.1	1	5.38e-05	0.000121	1.16465	0.124	1	0.605	VLISPGSDTVPAGLEIAAR	GLDSLLDLLR,EDTVPMDPIER,VLISPGSDTVPAGLEIAAR,TLDAFLDLVR	lcl|c234322_g7_i1|m.19718	lcl|c234322_g7_i1|m.19718,lcl|c240809_g1_i1|m.27759,lcl|c229784_g1_i1|m.14625	P43006	O57321,P43006
GO:2000134	biological_process	negative regulation of G1/S transition of mitotic cell cycle	0.000275	23	0.000293	24	0.0916213	0.828	1	0.000258	0.000274	0.0860434	0.835	1	0.966	IADFGLAR,LVQSPNSYFMDVK,DLLNPSVEEEK,VALTEPLVDVVEAK,QALLEAER,LTEGCSFR,GLLSYLNGETDTSSSIDK,DLTQIGDSVK,VEESTNGMEVDSSTANHVDEVSK,VNTDQPK,DIFLSSEIDQSNPTPR,AVVSSTTTEYK,DLLNPSVEEEKQK	IADFGLAR,VNTDQPK,QALLEAER,AALGLPQLCGLMALPAEVK,LTEGCSFR,GLLSYLNGETDTSSSIDK,ASSAPATPR,DLLNPSVEEEKQK,DLTQIGDSVK,EDSTEITNAEKPDR	lcl|c226782_g6_i6|m.11785,lcl|c230405_g2_i1|m.15255,lcl|c235052_g1_i3|m.20523,lcl|c221061_g4_i1|m.7355,lcl|c235052_g1_i4|m.20524,lcl|c227683_g10_i1|m.12674,lcl|c226176_g1_i2|m.11271,lcl|c221061_g4_i2|m.7358,lcl|c234885_g2_i10|m.20382,lcl|c235052_g1_i6|m.20525,lcl|c232719_g2_i1|m.17712,lcl|c226782_g6_i4|m.11783,lcl|c222225_g1_i1|m.8189,lcl|c213237_g2_i2|m.2995,lcl|c226782_g6_i5|m.11784,lcl|c233626…	lcl|c226782_g6_i6|m.11785,lcl|c235052_g1_i3|m.20523,lcl|c230405_g2_i1|m.15255,lcl|c221061_g4_i1|m.7355,lcl|c235052_g1_i4|m.20524,lcl|c227683_g10_i1|m.12674,lcl|c226176_g1_i2|m.11271,lcl|c221061_g4_i2|m.7358,lcl|c235052_g1_i6|m.20525,lcl|c234885_g2_i10|m.20382,lcl|c232719_g2_i1|m.17712,lcl|c226782_g6_i4|m.11783,lcl|c232224_g3_i1|m.17156,lcl|c232224_g3_i2|m.17159,lcl|c213237_g2_i2|m.2995,lcl|c22678…	Q61851,O64771,P29594,P18460,Q3UMM4,Q2TA25,Q00535,Q5ZKN1,Q00534,P43450,Q8N165,Q6Y7W6,Q6NU47,O22042,Q60806,P20794,Q7T6X2,A8WIP6,P12004,Q5ZLM0,Q99873,P22607,Q14186,P61258,Q6FN53,P08630,P27636,Q6P3Q4,Q3T0B7	Q61851,Q64701,Q64700,O64771,P18460,O55081,Q3UMM4,Q00535,Q5ZKN1,Q00534,Q08999,P43450,Q8N165,Q6Y7W6,Q6NU47,O22042,P20794,Q68FS3,Q7T6X2,A8WIP6,P12004,Q5ZLM0,P22607,Q14186,P28749,P61258,Q6FN53,P08630,P27636,Q6P3Q4,Q3T0B7
GO:0035136	biological_process	forelimb morphogenesis	0.0013173	110	0.00124735	102	-0.0787136	0.691	1	0.00119546	0.00113038	-0.0807656	0.682	1	0.928	TFPTFNPVTEEK,TEQGPQVDGEQLAK,LGPALATGNVV,FGGIEALVR,IMDLIDSGNKEGANLL,ALNNSSDAETTR,NTTLELGGK,ICNVAEGDKADVDK,ELGEYGLQQYSEVK,LAEPSLMLK,IMDLIDSGNKEGANL,GFFVQPTVFSEVQDNMR,TIPVDGNFLCYTR,IMDLIDSGNKEGANLLYGGAR,LFINNEYVDSVSGK,VVGDPFDLKTEQGPQVDGEQLAK,DLDYLASLETLDSGK,VVGDPFDLK	TFPTFNPVTEEK,TEQGPQVDGEQLAK,IMDLIDSGNKEGANLL,ALNNSSDAETTR,NTTLELGGK,FKDLDDLIDR,ICNVAEGDKADVDK,TMDASQR,SGGIPALVR,ELGEYGLQQYSEVK,GFFVQPTVFSEVQDNMR,IMDLIDSGNKEGANLLYGGAR,LFINNEYVDSVSGK,VVGDPFDLKTEQGPQVDGEQLAK,DLDYLASLETLDSGK,VVGDPFDLK,CFVEEPIYDEFVK	lcl|c229881_g6_i6|m.14719,lcl|c241349_g1_i1|m.28471	lcl|c229881_g6_i6|m.14719,lcl|c241349_g1_i1|m.28471	P30841,Q9CZS1,O94788,Q29I35,Q8HYE4,P11884,Q5R6B5,P05091,Q02257,P48644,P86886,O93344,P30998,P26233,P30837,B6V8E6,P14923,Q02453,Q8WNW3,Q17GS9,Q02248,P20000,Q8MI17,Q8SPJ1,Q62148,Q66HF8,P81178,Q63639,P51647,P13601,Q0VCX4,Q28399,P47738,P47895,O35945,Q29490,P27463,Q6P0K8,Q9WU82,Q9I8W8,P51977,P35224,P35223,P15437,P35222,P12762,Q5RF00,P18824,P24549,Q8K4D8,Q9JHW9,Q2XQV4,F1QGH7,P00352,Q7QHW5	P30841,Q9CZS1,O94788,Q29I35,Q8HYE4,P11884,Q5R6B5,P05091,Q02257,P48644,P86886,O93344,P30998,P26233,P30837,B6V8E6,P14923,Q02453,Q8WNW3,Q17GS9,Q02248,P20000,Q8MI17,Q8SPJ1,Q62148,Q66HF8,P81178,Q63639,P51647,P13601,Q0VCX4,Q28399,P47738,P47895,O35945,Q29490,P27463,Q6P0K8,Q9WU82,Q9I8W8,P51977,P35224,P35223,P15437,P35222,P12762,Q5RF00,P18824,P24549,Q8K4D8,Q9JHW9,Q2XQV4,F1QGH7,P00352,Q7QHW5
GO:2000138	biological_process	positive regulation of cell proliferation involved in heart morphogenesis	8.38e-05	7	7.34e-05	6	-0.192172	0.811	1	8.62e-05	7.68e-05	-0.165495	0.824	1	0.962	GVSPVSNPELLK,VDGYVDPSGGSR,NNLLLDSYR,LLQFVTGTSR,ALTSFDLETR	GVSPVSNPELLK,VDGYVDPSGGSR,NNLLLDSYR,NEQEMQQLIIEEK,LLQFVTGTSR	lcl|c233478_g1_i2|m.18597,lcl|c233142_g2_i1|m.18198,lcl|c233142_g2_i4|m.18201	lcl|c233478_g1_i2|m.18597,lcl|c233142_g2_i1|m.18198,lcl|c224337_g8_i7|m.9748,lcl|c233142_g2_i4|m.18201	P46935,P46934,Q62940,Q9VVI3,Q96PU5,Q9GKQ9,Q5RBF2,Q8CFI0	P46935,P46934,Q62940,Q9VVI3,Q96PU5,Q9GKQ9,Q5RBF2,Q8CFI0,P31266
GO:0035137	biological_process	hindlimb morphogenesis	8.38e-05	7	7.34e-05	6	-0.192172	0.811	1	8.62e-05	7.68e-05	-0.165495	0.824	1	0.962	LAEPSLMLK,FGGIEALVR,ALNNSSDAETTR	SGGIPALVR,ALNNSSDAETTR,VTMSSSVSLLSR	lcl|c241349_g1_i1|m.28471	lcl|c241349_g1_i1|m.28471,lcl|c222669_g8_i2|m.8513	P30998,P26233,Q6P0K8,Q9WU82,B6V8E6,Q29I35,P14923,P35224,P35223,P35222,Q02453,Q8WNW3,Q0VCX4,P18824,Q17GS9,Q02257,Q02248,F1QGH7,Q7QHW5,Q8SPJ1	P30998,P26233,Q8R418,Q6P0K8,Q9WU82,B6V8E6,Q29I35,P14923,P35224,P35223,P35222,Q02453,Q8WNW3,Q0VCX4,P18824,Q17GS9,Q02257,Q02248,F1QGH7,Q7QHW5,Q8SPJ1
GO:2000136	biological_process	regulation of cell proliferation involved in heart morphogenesis	0.000168	14	0.000147	12	-0.192172	0.735	1	0.000162	0.000143	-0.179301	0.743	1	0.943	GVSPVSNPELLK,LAEPSLMLK,FGGIEALVR,VDGYVDPSGGSR,NNLLLDSYR,ALNNSSDAETTR,LLQFVTGTSR,ALTSFDLETR	SGGIPALVR,GVSPVSNPELLK,VDGYVDPSGGSR,THAASTTGNTSIQ,NNLLLDSYR,ALNNSSDAETTR,NEQEMQQLIIEEK,LLQFVTGTSR	lcl|c233478_g1_i2|m.18597,lcl|c241349_g1_i1|m.28471,lcl|c233142_g2_i1|m.18198,lcl|c233142_g2_i4|m.18201	lcl|c240438_g2_i1|m.27257,lcl|c233478_g1_i2|m.18597,lcl|c241349_g1_i1|m.28471,lcl|c233142_g2_i1|m.18198,lcl|c224337_g8_i7|m.9748,lcl|c233142_g2_i4|m.18201	Q62940,Q29I35,Q9GKQ9,Q0VCX4,Q02257,Q9VVI3,Q96PU5,Q8CFI0,P30998,P26233,Q6P0K8,Q9WU82,B6V8E6,Q5RBF2,P14923,P35224,P35223,P35222,Q02453,Q8WNW3,P46935,P46934,P18824,Q17GS9,Q02248,F1QGH7,Q7QHW5,Q8SPJ1	Q62940,Q29I35,Q9GKQ9,Q0VCX4,Q99502,Q02257,Q9VVI3,Q96PU5,Q8CFI0,P30998,P26233,Q6P0K8,Q9WU82,B6V8E6,Q5RBF2,P14923,P35224,P35223,P35222,Q02453,Q8WNW3,P31266,P46935,P46934,P18824,Q17GS9,Q02248,F1QGH7,Q7QHW5,Q8SPJ1
GO:0036465	biological_process	synaptic vesicle recycling	0.00024	20	0.000122	10	-0.969779	0.077	1	0.000226	0.000121	-0.905736	0.0864	1	0.497	NPGSQANADKTNAVVGPSK,SSVLENFVGR,GISSLPINLR,VPVGDQPPDIEMLIR,GMEDLIPIMNK,NPGSQANADK,EIVAETDRETGSNK,SMAGEIGTLDPQMER,SATEELALPSTFR,AIEGGGDSIDTK,EVDPDGNR	SSVLENFVGR,NPGSQANADK,VGLFTPDMAFEAIVK,AIEGGGDSIDTK	lcl|c231030_g9_i2|m.15907,lcl|c231030_g9_i1|m.15904,lcl|c231030_g9_i1|m.15905,lcl|c231030_g9_i4|m.15909,lcl|c239343_g4_i4|m.25612	lcl|c231030_g9_i2|m.15907,lcl|c231030_g9_i1|m.15905,lcl|c231030_g9_i4|m.15909,lcl|c239343_g4_i4|m.25612	Q05193,O00429,P50570,Q8K1M6,Q08877,Q9UQ16,Q08DF4,Q2KIA5,Q8BZ98,O35303,P39054,Q7SXN5,A6H7I5,P39053,P27619,P39055,P39052,P21575	Q05193,O00429,P50570,Q8K1M6,Q08877,Q9UQ16,Q08DF4,Q2KIA5,Q8BZ98,O35303,P39054,Q7SXN5,A6H7I5,P39053,P27619,P39055,P39052,P21575
GO:0036466	biological_process	synaptic vesicle recycling via endosome	5.99e-05	5	1.22e-05	1	-2.29171	0.108	1	6.46e-05	2.19e-05	-1.55781	0.165	1	0.71	NPGSQANADKTNAVVGPSK,NPGSQANADK,SATEELALPSTFR,EVDPDGNR	NPGSQANADK	lcl|c231030_g9_i2|m.15907,lcl|c231030_g9_i1|m.15904,lcl|c231030_g9_i1|m.15905,lcl|c231030_g9_i4|m.15909	lcl|c231030_g9_i2|m.15907,lcl|c231030_g9_i1|m.15905,lcl|c231030_g9_i4|m.15909	O35303,Q7SXN5,O00429,Q8K1M6,Q2KIA5	O35303,Q7SXN5,O00429,Q8K1M6,Q2KIA5
GO:0060135	biological_process	maternal process involved in female pregnancy	0.000132	11	3.67e-05	3	-1.84425	0.0358	1	0.000129	4.39e-05	-1.55781	0.0497	1	0.4	TEPLEESTEK,AEPYPTTR,NQYPNQPTR,NIPFFPDLAVTDQVALLR,TPIETLLR	TEPLEESTEK	lcl|c231462_g1_i10|m.16284	lcl|c231462_g1_i10|m.16284	Q9TTR7	Q9TTR7
GO:2000152	biological_process	regulation of ubiquitin-specific protease activity	0.00251485	210	0.00284935	233	0.180161	0.188	1	0.00227246	0.00256804	0.176415	0.197	1	0.738	EMVELPLR,LAGESESNLR,EILQEQEK,VKEILQEQEK,LLVEEAINDDNSVVSMSQAK,GILLYGPPGTGK,FDREVDIGIPDATGR,TVIGGLTGSDPVSCSR,LGDIVSVQACPDVK,MDLIDLEDEQIDAEVLDSLA,NSPAIIFIDEIDAIAPK,IHVLPIDDTVEGLTGNL,SVVVKPDMSLEDAIK,EVDIGIPDATGRLEILR,QGPFDAVILPGGLGGTQNLAQSAK,LLVEEAINDDNSVV,AFEEAEK,LGDDVDLEQIAAETHGY,LGDDVDLEQIAAETHG,KAFEEAEK,QGPFDAVILPGGLGGTQNLAQ,IVSQLLTLMDGLK,EVDIGIPDATGR,MEELQLFR	EMVELPLR,EVDIGIPDATGRLEI,LAGESESNLR,IHVLPIDDTVEGLTGN,LLVEEAINDDNSVVSMSQAK,GILLYGPPGTGK,TVIGGLTGSDPVSCSR,IHVLPIDDTVEGLTGNL,SVVVKPDMSLEDAIK,FDREVDIGIPDATG,AFEEAEK,TVIGGLTGSDPVSCS,LGDDVDLEQIAAETHG,KAFEEAEK,IVSQLLTLMDGLK,EVDIGIPDATGR,EILQEQEK,VKEILQEQEK,IHVLPIDDTVEGLTGNLF,FDREVDIGIPDATGR,LGDIVSVQACPDVK,QGPFDAVILPGGLGGTQNLAQSAK,LLVEEAINDDNSVV,EVDIGIPDATGRLEIL,LGDDVDLEQIAAETHGY,MEELQLFR	lcl|c229538_g7_i4|m.14373,lcl|c235754_g3_i10|m.21302,lcl|c226414_g3_i1|m.11460,lcl|c235754_g3_i1|m.21301,lcl|c234626_g4_i3|m.20042	lcl|c229538_g7_i4|m.14373,lcl|c235754_g3_i10|m.21302,lcl|c226414_g3_i1|m.11460,lcl|c235754_g3_i1|m.21301,lcl|c234626_g4_i3|m.20042	Q9SCN8,Q9P3A7,P54774,Q5R658,P25694,Q9UN37,Q7KN62,Q7ZU99,Q793F9,P54812,P54811,Q8VEJ9,Q96372,A0JMA9,P23787,Q5E946,P46467,P55072,P03974,P46462,O75351,Q01853,Q0VD48,Q3ZBT1,P54609,Q9LZF6,Q6GL04,Q5AWS6	Q9SCN8,Q9P3A7,P54774,Q5R658,P25694,Q9UN37,Q7KN62,Q7ZU99,Q793F9,P54812,P54811,Q8VEJ9,Q96372,A0JMA9,P23787,Q5E946,P46467,P55072,P03974,P46462,O75351,Q01853,Q0VD48,Q3ZBT1,P54609,Q9LZF6,Q6GL04,Q5AWS6
GO:0061462	biological_process	protein localization to lysosome	0.00585601	489	0.00672594	550	0.199818	0.0253	1	0.00527727	0.00604697	0.19642	0.0278	1	0.276	FDLTVGPK,NQVAMNPTNTIFDAK,DVDIPKDK,IYIPLPEASAR,FDDASVQSDMK,TSLMNQYVNK,GVSPVSNPELLK,LVTMQIWDTAGQER,VIEEYR,GADCCVLVFDVTQPSTFK,ALTSFDLETR,NALAQETEVELY,TMDDALADDDRDDTLLPM,GMTTSNNLLGK,TSLMNQYVNKK,LLEPVVNMTDMLR,AVVEYPFHCCLITNMK,DPENFPFVVLGNK,LALADAGDTVEDANFVEK,EVDEVVLVGGSTR,EHGVDQR,LSKDDIDR,TTPSYVAFTENER,TGFYELQAAR,EAINVEQAFQTIAK,ELTSWPAK,QTVAPLQEK,NNLLLDSYR,EAINVEQAF,TQICALVNQAK,SENESESAR,KEDEVPSPTD,AA…	NQVAMNPTNTIFDAK,IYIPLPEASAR,FDDASVQSDMK,GVSPVSNPELLK,LVTMQIWDTAGQER,GADCCVLVFDVTQPSTFK,TMDDALADDDRDDTLLPM,LASSATEDGDEGLGEILK,IIDLIYWK,TSLMNQYVNKK,LLEPVVNMTDMLR,DPENFPFVVLGNK,VNDDLSR,EHGVDQR,TTPSYVAFTENER,TGFYELQAAR,EAINVEQAFQTIAK,ELTSWPAK,QTVAPLQEK,NNLLLDSYR,AQAWCHSK,SENESESAR,AAAPTSDSLLPLGPER,ATIGADFLTK,NDIPYFETSAK,FQSLGVAFYR,GILLYGPPGTGK,EVMVDDR,LLQFVTGTSR,QKELESICNPIITK,SLATSKPTVNSADLK,SDLQSMG…	lcl|c210253_g1_i2|m.2149,lcl|c229538_g7_i4|m.14373,lcl|c233142_g2_i1|m.18198,lcl|c236955_g1_i6|m.22720,lcl|c236955_g1_i2|m.22718,lcl|c236283_g1_i1|m.21952,lcl|c236114_g1_i1|m.21718,lcl|c231881_g1_i2|m.16748,lcl|c237883_g5_i4|m.23859,lcl|c233212_g2_i5|m.18273,lcl|c233212_g2_i6|m.18275,lcl|c237883_g5_i1|m.23858,lcl|c221208_g3_i5|m.7476,lcl|c213534_g3_i4|m.3118,lcl|c213783_g1_i1|m.3203,lcl|c221208_g…	lcl|c210253_g1_i2|m.2149,lcl|c233212_g2_i5|m.18273,lcl|c229538_g7_i4|m.14373,lcl|c233212_g2_i6|m.18275,lcl|c237883_g5_i1|m.23858,lcl|c233142_g2_i1|m.18198,lcl|c236955_g1_i6|m.22720,lcl|c221208_g3_i5|m.7476,lcl|c213534_g3_i4|m.3118,lcl|c221208_g3_i12|m.7474,lcl|c241251_g1_i2|m.28363,lcl|c236955_g1_i2|m.22718,lcl|c236114_g1_i2|m.21721,lcl|c241251_g1_i1|m.28362,lcl|c236114_g1_i1|m.21718,lcl|c231881_…	P25694,P09527,Q7KN62,O73885,Q793F9,Q5NVM9,Q5R7D3,Q4R888,P17156,Q96372,Q9P2J5,Q9N1U2,Q7YQC6,P23787,P26413,Q28222,P16627,Q9U639,Q99P72,P46935,P46934,Q01877,Q0VD48,O35114,A2Q0Z1,Q91233,P08418,Q9UN37,P11147,P14659,P18067,P22954,Q24789,Q9VVI3,Q05944,Q8BMJ2,Q8CFI0,P22953,P41753,P34933,P34931,O75351,P30730,P53677,P34930,P53678,Q01853,Q04967,Q8BMI3,O65719,Q6S4N2,Q91291,P24629,Q9I8F9,P55063,Q9W6Y1,Q6GL04,…	P25694,P09527,Q7KN62,O73885,Q793F9,Q5NVM9,Q5R7D3,Q4R888,P17156,Q96372,Q9P2J5,Q9N1U2,Q7YQC6,P23787,P26413,Q28222,P16627,Q9U639,Q99P72,P46935,P46934,Q01877,Q0VD48,O35114,A2Q0Z1,Q91233,P08418,Q9UN37,P11147,P14659,P18067,P22954,Q24789,Q05944,Q9VVI3,Q8BMJ2,P22953,Q8CFI0,P41753,P34933,P34931,O75351,P34930,Q01853,Q04967,Q8BMI3,O65719,Q6S4N2,Q91291,P24629,Q9I8F9,P55063,Q9W6Y1,Q6GL04,P22202,Q9SCN8,P54774,…
GO:0060136	biological_process	embryonic process involved in female pregnancy	7.19e-05	6	7.34e-05	6	0.0302207	0.971	1	7.54e-05	7.68e-05	0.0271497	0.972	1	0.992	VGPPIISTEIK,VIGAEQGGLR,FIIADGSLLGK,VLNDVQDMK	VGPPIISTEIK,VIGAEQGGLR,FIIADGSLLGK,VLNDVQDMK	lcl|c229658_g3_i1|m.14486,lcl|c229541_g1_i10|m.14379,lcl|c229541_g1_i8|m.14382,lcl|c238200_g3_i4|m.24238,lcl|c229658_g3_i2|m.14487,lcl|c229541_g1_i2|m.14380	lcl|c229658_g3_i1|m.14486,lcl|c229541_g1_i10|m.14379,lcl|c229541_g1_i8|m.14382,lcl|c238200_g3_i4|m.24238,lcl|c229658_g3_i2|m.14487,lcl|c229541_g1_i2|m.14380	Q00613,O60488,P38529	Q00613,O60488,P38529
GO:0061469	biological_process	regulation of type B pancreatic cell proliferation	0	0	1.22e-05	1	null	0.312	1	1.08e-05	2.19e-05	1.02715	0.553	1	0.892		TNDFPDR		lcl|c228623_g7_i1|m.13472		Q8C4U3
GO:2000146	biological_process	negative regulation of cell motility	0.00845468	706	0.00830347	679	-0.0260359	0.736	1	0.00761435	0.00746269	-0.0290258	0.707	1	0.933	GVGNPAPEINWIK,IFNIYPR,LVTPTLYK,QTNTSQWEMPSDEAATKV,IKGNPEEVTMLVI,QIDNPNYKGEWIHPEIDNPEYQPDDALY,QTNTSQWEMPSDEAATK,SQPVYLGPPPSAQLDQVAADLIADAVLAK,GINLSGGQK,GVADVTICQGK,QLNEVLDKEDSSSPPEPTPE,TEPLEESTEK,ILALNDIR,FQGLQSTSGDEPLR,CFTIASVK,VEREPYNGPVIQLPTSQLPQIVSPSQR,NQEDNLDEINK,FYNDADLDKGIQTSEDAKF,TVGNEDLLSFVTK,LGQVESWAQK,GEWIHPEIDNPEYQPDDA,MKDEQDEK,EYRDIIEAAQK,DFPLQDGEIETR,DGSSISSDSDSQK,TLGVGGFGR,HEQSIDCGG…	EVEEGLLK,GVGNPAPEINWIK,IFNIYPR,QIDNPNYKGEWIHPEIDNPEYQPDDALY,QTNTSQWEMPSDEAATK,AVGLASADIGGTSDPFAVIELNNQR,GINLSGGQK,QMHGDSPYL,GVADVTICQGK,TEPLEESTEK,ILALNDIR,FQGLQSTSGDEPLR,CFTIASVK,VEREPYNGPVIQLPTSQLPQIVSPSQR,SGTIFDNILVTD,DIKPENL,NQEDNLDEINK,FYNDADLDKGIQTSEDAKF,TVGNEDLLSFVTK,GEWIHPEIDNPEYQPDDA,MKDEQDEK,EWIDQGLNR,DFPLQDGEIETR,QIDNPNYKGEWIHPEIDNPEYQPDDALYK,TLGVGGFGR,HEQSIDCGGGYVK,KIPNGVNGVEDR,FYNDAD…	lcl|c220963_g1_i2|m.7277,lcl|c236195_g4_i1|m.21828,lcl|c220963_g1_i1|m.7276,lcl|c231462_g1_i10|m.16284,lcl|c226071_g2_i11|m.11178,lcl|c164490_g1_i1|m.440,lcl|c230175_g2_i2|m.15021,lcl|c236195_g2_i6|m.21826,lcl|c226065_g5_i1|m.11162,lcl|c241349_g1_i1|m.28471,lcl|c226071_g2_i7|m.11182,lcl|c243909_g1_i1|m.31505,lcl|c236924_g5_i3|m.22694,lcl|c236924_g5_i5|m.22695,lcl|c217312_g3_i2|m.5103,lcl|c226071_…	lcl|c234064_g1_i4|m.19396,lcl|c220963_g1_i2|m.7277,lcl|c234064_g1_i2|m.19394,lcl|c236195_g4_i1|m.21828,lcl|c220963_g1_i1|m.7276,lcl|c242662_g1_i1|m.30100,lcl|c221676_g4_i8|m.7788,lcl|c231462_g1_i10|m.16284,lcl|c226071_g2_i11|m.11178,lcl|c230175_g2_i2|m.15021,lcl|c225854_g1_i4|m.10994,lcl|c221676_g4_i4|m.7786,lcl|c226071_g2_i7|m.11182,lcl|c243909_g1_i1|m.31505,lcl|c236924_g5_i3|m.22694,lcl|c224773…	Q7FB56,Q7GB25,Q640K6,Q15418,A7KVC2,Q54JR2,Q29I35,P32386,Q9JJ19,O08553,Q54LE6,Q28689,Q8VZZ4,Q54V86,O89026,O35889,E9PV86,Q9EQF5,Q8T6H3,Q5R9Y6,P30998,Q91ZS8,B6V8E6,Q9R1S7,Q02453,P18652,Q8WNW3,P18653,Q8T6H8,Q9TTR7,P18654,P14211,Q9QYM0,Q17GS9,Q52PJ5,O88563,Q9LZJ5,P0C605,Q9WUT3,O60706,P97603,Q62188,P51400,P16444,Q6GL72,Q14195,Q14194,Q6Y306,Q14117,P31429,Q9WUM3,P51812,P38735,P35224,Q5T3U5,P35223,P35222,…	Q7FB56,Q7GB25,Q15418,A7KVC2,Q54JR2,Q29I35,P32386,Q9JJ19,Q54LE6,O08553,Q8VZZ4,Q9DB30,Q54V86,A5GFW1,P49138,Q8T6H3,Q5R9Y6,Q91757,P30998,Q3MHJ9,Q02453,P18652,P18653,Q8T6H8,P18654,Q9QYM0,Q17GS9,O61661,O88563,Q9LZJ5,P0C605,Q9WUT3,Q62188,P16444,Q14117,Q9UPQ0,Q9WV60,Q5YJC2,P51812,Q5T3U5,P11798,P31266,P54646,Q54VJ0,Q9QZQ1,O35379,Q8C4U3,Q9BUL8,Q6GPN6,P11801,Q96BR1,Q864R9,P97427,Q63531,O75582,B2RX12,A0A0D1C…
GO:0098727	biological_process	maintenance of cell number	0.000826	69	0.000991	81	0.261546	0.268	1	0.000754	0.0009	0.255419	0.276	1	0.833	IADFGLAR,LTGLTEADLQAR,LSQQSEPQK,LGEQEEQSQLLQSLLNDANER,IAEEQSR,KDPEAETEK,TAVEPETSDDTAVDSTQDQQTR,EVVEESTPVK,ASEPTENR,AAAEEMSEEQK,IAEVDELSPEMGER,NTSATDLQSSELNEQTTK,TAQTPETR,LVFFSGSR,EEGEQMETGEEK,LDPFLQEK,TQQTSAVSSR,TSPGSPTSDTNAPFTR,TGLDLTAEWK,FGGIEALVR,ALNNSSDAETTR,SFTNDISQGEQR,IEGDEGGVDAPTR,VTDLWEGLPQK,GLLSYLNGETDTSSSIDK,SQQDLEQSIK,SIDQFANLLLQDTIER,EAEPSSASTSQQTLK,SGQLSSDQCK,GAGATATSQASR,LAEPSLMLK,…	IADFGLAR,ETGQMDANTIK,LSQQSEPQK,LGEQEEQSQLLQSLLNDANER,IAEEQSR,KDPEAETEK,TAVEPETSDDTAVDSTQDQQTR,IAEVDELSPEMGER,SGGIPALVR,EIAEQSGNVEEAEK,NTSATDLQSSELNEQTTK,TAQTPETR,LGLIPLISDDVVDR,DVELSPVVNR,TQQTSAVSSR,TNDFPDR,TGLDLTAEWK,ALNNSSDAETTR,QNAQWDTGENPIFK,SFTNDISQGEQR,IEGDEGGVDAPTR,GLLSYLNGETDTSSSIDK,SQQDLEQSIK,EAEPSSASTSQQTLK,SGQLSSDQCK,GAGATATSQASR,LMEAESELDDVR,NESSEEVIGR,SVDSSEPSR,NEQEMQQLIIEEK,EINEDSQE…	lcl|c226782_g6_i6|m.11785,lcl|c235052_g1_i3|m.20523,lcl|c221061_g4_i1|m.7355,lcl|c235052_g1_i4|m.20524,lcl|c235446_g2_i1|m.20934,lcl|c233761_g2_i1|m.18976,lcl|c226176_g1_i2|m.11271,lcl|c221061_g4_i2|m.7358,lcl|c235052_g1_i6|m.20525,lcl|c232719_g2_i1|m.17712,lcl|c226782_g6_i4|m.11783,lcl|c236859_g1_i3|m.22625,lcl|c213237_g2_i2|m.2995,lcl|c226782_g6_i5|m.11784,lcl|c236859_g1_i2|m.22623,lcl|c221431_…	lcl|c226782_g6_i6|m.11785,lcl|c235052_g1_i3|m.20523,lcl|c221061_g4_i1|m.7355,lcl|c235052_g1_i4|m.20524,lcl|c235446_g2_i1|m.20934,lcl|c233761_g2_i1|m.18976,lcl|c222669_g8_i2|m.8513,lcl|c226176_g1_i2|m.11271,lcl|c221061_g4_i2|m.7358,lcl|c235052_g1_i6|m.20525,lcl|c232719_g2_i1|m.17712,lcl|c226782_g6_i4|m.11783,lcl|c236859_g1_i3|m.22625,lcl|c213237_g2_i2|m.2995,lcl|c226782_g6_i5|m.11784,lcl|c228623_g…	O64771,Q29I35,Q3U435,Q3UMM4,P52434,Q02257,Q6GQ73,P20794,Q6IR75,Q9Y5R2,P30998,P26233,Q7T6X2,B6V8E6,Q923G2,P14923,P11414,Q02453,Q8WNW3,P51512,P24928,Q17GS9,Q02248,Q15154,Q6FN53,P27636,Q5TUF1,P08775,Q8SPJ1,Q61851,P18460,Q86VS8,P11584,Q0VCX4,Q00535,Q5ZKN1,Q00534,P43450,Q8N165,Q94899,Q6NU47,O22042,P61203,P61202,P61201,Q6IQT4,Q6P0K8,Q9WU82,A8WIP6,P35224,P35223,P35222,P18824,Q5ZLM0,A4IFB1,Q5E9Z8,B6MFW3,…	O64771,Q29I35,Q3UMM4,P52434,Q02257,Q6GQ73,P20794,Q9Y5R2,P30998,Q8R418,P26233,Q7T6X2,B6V8E6,Q923G2,P14923,P11414,P19387,Q02453,Q8WNW3,P51512,P24928,Q17GS9,Q02248,Q15154,Q6FN53,P27636,Q5TUF1,P08775,Q8SPJ1,Q61851,P18460,Q86VS8,P11584,Q0VCX4,Q00535,Q5ZKN1,Q00534,P43450,Q8N165,Q6NU47,O22042,Q6P0K8,Q9WU82,A8WIP6,P35224,P35223,P35222,P31266,P18824,Q5ZLM0,A4IFB1,B6MFW3,P22607,P08630,Q8C4U3,Q92541,F1QGH7,…
GO:2000145	biological_process	regulation of cell motility	0.0367767	3071	0.0352439	2882	-0.0614174	0.0945	1	0.0330853	0.0316396	-0.0644577	0.0798	1	0.474	IFNIYPR,QIVPSTENIK,VSEDEEKEKEDTGEIK,YNPTEVGR,QTNTSQWEMPSDEAATKV,SLPSSSASK,LPGGSWGPSTVPWTDVR,ASSLPDVDTFGK,CDVCNAGYYR,SDCVGGGR,QLNEVLDKEDSSSPPEPTPE,IMAIVDPNGTGYVTF,QLNPNTTVK,AGAYDYPSPEWDTVTDEAK,IGSSGAPVTDQSEETR,ILALNDIR,EPSEYDILHIQNQK,SEEDRITEAEKNER,VEREPYNGPVIQLPTSQLPQIVSPSQR,ERETGIPPEQSMETAK,TVELALWDTAGQEDYDR,HLTYENVER,TLFPGNDHIDQLT,TPLTSEQAFYAR,ALQASALK,VFDILDFR,SDPFVIIK,GQVFDVGPR,MLDAEEMVNMAKPD…	IFNIYPR,SLPSSSASK,LPGGSWGPSTVPWTDVR,ASSLPDVDTFGK,KAVCDTSLSQVTHNIEPV,IMAIVDPNGTGYVTF,QLNPNTTVK,IGSSGAPVTDQSEETR,ILALNDIR,EPSEYDILHIQNQK,SEEDRITEAEKNER,VEREPYNGPVIQLPTSQLPQIVSPSQR,ERETGIPPEQSMETAK,TVELALWDTAGQEDYDR,HLTYENVER,EQIDEIKTK,TPLTSEQAFYAR,QSEKPLEILEK,LQNGRPVNVVSK,ALQASALK,VFDILDFR,SDPFVIIK,GQVFDVGPR,MLDAEEMVNMAKPDER,NEFDLESK,RLAELVK,LSSGSWGCCPLRK,MGSSSAAAAAEASH,FYLGGVPEGFNSK,GEWIHPEIDNPEYQ…	lcl|c242947_g1_i3|m.30437,lcl|c235115_g6_i1|m.20588,lcl|c232719_g2_i1|m.17712,lcl|c221676_g4_i8|m.7788,lcl|c226071_g2_i11|m.11178,lcl|c234711_g2_i8|m.20166,lcl|c226071_g2_i7|m.11182,lcl|c221676_g4_i4|m.7786,lcl|c243541_g3_i2|m.31058,lcl|c238843_g5_i10|m.24992,lcl|c236924_g5_i5|m.22695,lcl|c222307_g1_i1|m.8241,lcl|c217834_g1_i3|m.5399,lcl|c229917_g4_i4|m.14770,lcl|c230360_g10_i5|m.15205,lcl|c24236…	lcl|c242947_g1_i3|m.30437,lcl|c235115_g6_i1|m.20588,lcl|c221676_g4_i8|m.7788,lcl|c232719_g2_i1|m.17712,lcl|c226071_g2_i11|m.11178,lcl|c221676_g4_i4|m.7786,lcl|c226071_g2_i7|m.11182,lcl|c243541_g3_i2|m.31058,lcl|c224773_g5_i3|m.10121,lcl|c238843_g5_i10|m.24992,lcl|c236924_g5_i5|m.22695,lcl|c235441_g4_i6|m.20931,lcl|c217834_g1_i3|m.5399,lcl|c224520_g2_i6|m.9890,lcl|c227927_g4_i1|m.12894,lcl|c229917…	A5A6I5,Q9SAF5,A5UCG6,B1JJM7,Q9JJ19,Q9SX33,B8D894,Q54LE6,A9N1J6,E7F9L8,Q54V86,F1PRN2,O14786,Q5SYD0,P42861,P41413,P05696,Q8T6H3,P30998,P98200,Q9UBC5,P28693,Q8NF91,P98204,Q92608,Q3MHJ9,P62490,P18652,P39688,Q8T6H8,P18653,P18654,O00159,P40792,O35598,O00160,A5DKH0,P61158,A1JRV9,P61157,Q9LZJ5,P59083,P0C605,Q31TX1,O75923,Q12965,A1DBH2,Q6BUQ2,Q62188,Q83IN9,Q5PL07,P16444,Q0III9,O60423,P62491,P0A6T1,P62492,…	A5A6I5,Q9SAF5,A5UCG6,B1JJM7,Q9JJ19,Q9SX33,B8D894,Q54LE6,A9N1J6,E7F9L8,Q54V86,Q9DB30,A5GFW1,P49138,F1PRN2,O14786,Q5SYD0,P42861,P05696,Q8T6H3,P30998,P98200,Q91757,Q9UBC5,P28693,Q8NF91,P98204,Q92608,Q3MHJ9,P62490,P18652,P39688,Q8T6H8,P18653,P18654,O00159,P40792,O35598,O00160,A5DKH0,O61661,P61158,A1JRV9,P61157,Q9LZJ5,P59083,P0C605,Q31TX1,O75923,Q12965,A1DBH2,Q6BUQ2,Q62188,Q83IN9,Q5PL07,P16444,Q0III9,…
GO:2000144	biological_process	positive regulation of DNA-templated transcription, initiation	0.00085	71	0.000929	76	0.128401	0.589	1	0.000775	0.000845	0.124011	0.6	1	0.908	DEDDFSFPIADK,LIFSTITAK,FGGIEALVR,AVASQLDANFLK,GVLLYGPPGTGK,TMLELINQLDGFDPR,ALNNSSDAETTR,AMEVDERPTEQ,VQEEYIKDEQK,DYVIEEDFMK,EVIELPLTNPELFQR,FENLGIAPPK,AMEVDERPTEQY,VIMATNR,VKQEPTQSSSR,ALQSVGQIVGEVLR,LEGGSGGDSEVQR,LAGPQLVQMFIGDGAK,LAEPSLMLK,FDDGAGGDNEVQR,FDAQTGADR,MNVSPDVNFDELSR	LIFSTITAK,ILSTIDR,FVVDLDK,AVASQLDANFLK,GVLLYGPPGTGK,ALNNSSDAETTR,DYVIEEDFMK,EVIELPLTNPELFQR,FENLGIAPPK,VVGSEFVQK,HGDIDYEAVVK,AMEVDERPTEQY,SGGIPALVR,ILLELLNQMDGFDQNVNVK,LSDGFNGADLR,VIMATNR,KIELPNPDQEAR,ALQSVGQIVGEVLR,LEGGSGGDSEVQR,LAGPQLVQMFIGDGAK,FDDGAGGDNEVQR,FDAQTGADR,VPDSTYEMVGGLDK	lcl|c222581_g2_i12|m.8452,lcl|c226065_g5_i2|m.11164,lcl|c222581_g2_i12|m.8451,lcl|c210819_g1_i13|m.2279,lcl|c226065_g5_i1|m.11162,lcl|c204019_g3_i1|m.1367,lcl|c241349_g1_i1|m.28471,lcl|c223433_g6_i1|m.9115,lcl|c204019_g1_i1|m.1366,lcl|c216194_g2_i1|m.4425,lcl|c227794_g1_i1|m.12770	lcl|c222581_g2_i12|m.8452,lcl|c222581_g2_i12|m.8451,lcl|c204019_g3_i1|m.1367,lcl|c241349_g1_i1|m.28471,lcl|c223433_g6_i1|m.9115,lcl|c204019_g1_i1|m.1366,lcl|c216194_g2_i1|m.4425,lcl|c227794_g1_i1|m.12770	P54775,Q2KIW6,P46470,O42587,Q29I35,Q5E9F9,Q63570,P54814,P62198,P46507,P62194,Q9MAK9,Q02257,P62195,Q3T030,P62196,P62197,P30998,P26233,Q9C5U3,B6V8E6,P14923,Q08874,Q02453,Q8WNW3,O17071,Q17GS9,Q02248,O88368,O88685,Q8SPJ1,P35998,Q0VCX4,P62333,P62334,P62335,Q63569,Q94BQ2,Q6P0K8,Q9WU82,Q9SEI3,P35224,P35223,P17980,P35222,O75030,P18824,Q05B92,Q4R7L3,Q4R4R0,F1QGH7,O18413,P43686,Q7QHW5,Q5ZK63	P54775,Q2KIW6,P46470,O42587,Q29I35,Q5E9F9,Q63570,P54814,P62198,P46507,P62194,Q9MAK9,Q02257,P62195,Q3T030,P62196,P62197,P30998,P26233,Q9C5U3,B6V8E6,P14923,Q02453,Q8WNW3,O17071,Q17GS9,Q02248,O88685,Q8SPJ1,P35998,Q0VCX4,P62333,P62334,P62335,Q63569,Q94BQ2,Q6P0K8,Q9WU82,Q9SEI3,P35224,P35223,P17980,P35222,P18824,Q4R7L3,Q4R4R0,F1QGH7,O18413,P43686,Q7QHW5
GO:0106005	biological_process	RNA 5'-cap (guanine-N7)-methylation	0.000611	51	0.000624	51	0.0302207	0.916	1	0.00056	0.000571	0.0271497	0.924	1	0.992	TVAEDTKDEDNK,DSTSLLYK,SEDLSFGNDVYK,KQETAEDTSG,DEDNKEESTDEK,TVAEDTKDEDNKEESTDEK,AEQAMAEK,NFNNWIK,YRDPLFTPEFI,QEDEELVSSADDAYTHAK,MEEETAESR,HYNELPEGTK,EVEEAKPEQETAE,QDEESEEKVPESSDGLGDK,EVEEAKPEQETAEEEGK,DFLEGIQLNQDK,EEVEMEAEPVEK	TVAEDTKDEDNK,DSTSLLYK,SEDLSFGNDVYK,KQETAEDTSG,TVAEDTKDEDNKEESTDEK,AEQAMAEK,NFNNWIK,YRDPLFTPEFI,QEDEELVSSADDAYTHAK,ALETYPPRQEDEELVSSADDAYTHAK,MEEETAESR,HYNELPEGTK,YRDPLFTPEF,IDPEAEKR,QDEESEEKVPESSDGLGDK,DFLEGIQLNQDK	lcl|c232744_g5_i2|m.17733	lcl|c232744_g5_i2|m.17733	O43148	O43148
GO:0106004	biological_process	tRNA (guanine-N7)-methylation	1.2e-05	1	0	0	null	0.322	1	2.15e-05	1.1e-05	-0.97285	0.575	1	0.892	VEFADIGCGYGGLLVNLSPM		lcl|c225710_g7_i1|m.10846,lcl|c225710_g7_i3|m.10847		Q6NU94,Q9Z120
GO:0035126	biological_process	post-embryonic genitalia morphogenesis	0.000335	28	0.000269	22	-0.317703	0.439	1	0.000312	0.000252	-0.307269	0.445	1	0.892	IAEVDELSPEMGER,SGQLSSDQCK,QIVPSTENIK,MFTWLVNR,VTASEVFK,INTSLVNETYR,TPLTSEQAFYAR,SEDAFLENLR,LLESNPVLEAFGNAR	LQNGRPVNVVSK,IAEVDELSPEMGER,SGQLSSDQCK,IANGSLSGISVSSK,MFTWLVNR,VTASEVFK,INTSLVNETYR,QNAQWDTGENPIFK,TPLTSEQAFYAR,YCDECPSCVGK,SEDAFLENLR,LLESNPVLEAFGNAR	lcl|c233339_g2_i12|m.18429,lcl|c236015_g2_i16|m.21586	lcl|c233339_g2_i12|m.18429,lcl|c236015_g2_i16|m.21586	Q05096,P34109,A0MP03,O43795,Q5ZLA6,Q5ZMC2,Q63355,P11584,Q63357,E7F9L8,Q23979,Q23978,F1PRN2,Q17R14,Q5SYD0,P10568,Q9UBC5,O94832,Q6GPA1,Q62774,O00159,Q5SUA5,Q27966,Q9D6A1,B0I1T2,A5PF48,O88329,P47807,Q03479,Q9WTI7,Q8N1T3,Q92002,P46735	Q05096,P34109,A0MP03,O43795,Q5ZLA6,Q5ZMC2,Q63355,P11584,Q63357,E7F9L8,Q23979,Q23978,F1PRN2,Q17R14,Q5SYD0,P10568,Q9UBC5,O94832,Q6GPA1,Q62774,O00159,Q5SUA5,Q27966,Q9D6A1,B0I1T2,A5PF48,O88329,P47807,Q03479,Q9WTI7,Q8N1T3,Q92002,P46735
GO:0106001	biological_process	intestinal hexose absorption	0.0081074	677	0.0073007	597	-0.151204	0.0608	1	0.00730202	0.00656277	-0.15399	0.0561	1	0.4	NISFNDKK,SMEEQQSR,EQLESEAK,TAVEYIK,LAEDESEKEMLMK,LLMEGETINDLMALSPEEILLR,KVQSQDVK,YQELEEEEK,KLQEQAESLQEK,EQLDVSGGTSESSAEGTK,LMDEAMCSR,VYLPINAATSDVFEK,EAFDQFDLDR,ITEAEKNER,EPSEYDILHIQNQK,SEEDRITEAEKNER,MLQMADK,HSYSEAER,VAQDLEMYGVQYFEIK,EEAIEEYLK,MINLSVPDTIDER,MLQQLQEDLKNEK,NDKLTPR,ITPPEMFVDTHPMR,TTVSEENGDNSNNPAR,IPDMTMSVIK,LQEQAESLQEK,IGFPWSEIR,VVEVAPLAQSLNSTDVFLLNNPQAR,WTLTEWNEK,AAELELKR,EGNDKVDES…	ALEDKQAR,NISFNDKK,SMEEQQSR,EQLESEAK,TAVEYIK,LAEDESEKEMLMK,LAEDESEKEML,LLMEGETINDLMALSPEEILLR,KVQSQDVK,YQELEEEEK,DPSIATSQAVLDLVDAIKPGVV,KLQEQAESLQEK,EQLDVSGGTSESSAEGTK,LMDEAMCSR,VYLPINAATSDVFEK,ITEAEKNER,EPSEYDILHIQNQK,SEEDRITEAEKNER,MLQMADK,HSYSEAER,VAQDLEMYGVQYFEIK,EEAIEEYLK,EQIDEIKTK,MINLSVPDTIDER,IANFKDPSIATSQAVLDLVDAIKPGVV,MLQQLQEDLKNEK,NDKLTPR,QKEQIDEIK,ITPPEMFVDTHPMR,TTVSEENGDNSNNPAR,LQEQAE…	lcl|c221753_g3_i7|m.7844,lcl|c222555_g2_i4|m.8428,lcl|c233306_g1_i2|m.18390,lcl|c233306_g1_i7|m.18391,lcl|c233306_g1_i1|m.18389	lcl|c221753_g3_i7|m.7844,lcl|c222555_g2_i4|m.8428,lcl|c233306_g1_i2|m.18390,lcl|c233306_g1_i7|m.18391,lcl|c233306_g1_i1|m.18389	Q99K51,P26040,Q3V0K9,P26043,A6H742,P13796,P13797,O88818,Q61233,Q63598,P15311,P54680,A7E3Q8,Q6P698,P09327	Q99K51,P26040,Q3V0K9,P26043,A6H742,P13796,P13797,O88818,Q61233,Q63598,P15311,P54680,A7E3Q8,Q6P698,P09327
GO:2000147	biological_process	positive regulation of cell motility	0.0305494	2551	0.0292028	2388	-0.0650393	0.108	1	0.0274849	0.0262182	-0.0680718	0.0929	1	0.517	QIVPSTENIK,VSEDEEKEKEDTGEIK,YNPTEVGR,SLPSSSASK,LPGGSWGPSTVPWTDVR,ASSLPDVDTFGK,SDCVGGGR,IMAIVDPNGTGYVTF,QLNPNTTVK,AGAYDYPSPEWDTVTDEAK,IGSSGAPVTDQSEETR,EPSEYDILHIQNQK,SEEDRITEAEKNER,ERETGIPPEQSMETAK,HLTYENVER,TLFPGNDHIDQLT,TPLTSEQAFYAR,ALQASALK,SDPFVIIK,GQVFDVGPR,MLDAEEMVNMAKPDER,AVNSDLLETR,GEWIHPEIDNPEYQPDDAL,LIAMLSSVFDNLVR,GLDLVNPK,MSDEEIHSR,ESQCQEDQTCCK,CLPNVIGIQCDK,AVVPQTSGMVAPVTGDNNFGVR,TGTDNP…	SLPSSSASK,LPGGSWGPSTVPWTDVR,ASSLPDVDTFGK,KAVCDTSLSQVTHNIEPV,IMAIVDPNGTGYVTF,QLNPNTTVK,IGSSGAPVTDQSEETR,EPSEYDILHIQNQK,SEEDRITEAEKNER,ERETGIPPEQSMETAK,HLTYENVER,EQIDEIKTK,TPLTSEQAFYAR,QSEKPLEILEK,LQNGRPVNVVSK,ALQASALK,SDPFVIIK,GQVFDVGPR,MLDAEEMVNMAKPDER,NEFDLESK,RLAELVK,LSSGSWGCCPLRK,MGSSSAAAAAEASH,GEWIHPEIDNPEYQPDDAL,LIAMLSSVFDNLVR,GLDLVNPK,QDDSEVDEVLVDLT,CLPNVIGIQCDK,AVVPQTSGMVAPVTGDNNFGVR,TGTDN…	lcl|c237097_g2_i1|m.22905,lcl|c242947_g1_i3|m.30437,lcl|c235115_g6_i1|m.20588,lcl|c221676_g4_i8|m.7788,lcl|c214211_g3_i3|m.3396,lcl|c229592_g3_i11|m.14442,lcl|c226071_g2_i11|m.11178,lcl|c234711_g2_i8|m.20166,lcl|c221676_g4_i5|m.7787,lcl|c229025_g3_i1|m.13888,lcl|c226071_g2_i7|m.11182,lcl|c221676_g4_i4|m.7786,lcl|c243541_g3_i2|m.31058,lcl|c220695_g1_i1|m.7091,lcl|c238843_g5_i10|m.24992,lcl|c222307…	lcl|c237097_g2_i1|m.22905,lcl|c242947_g1_i3|m.30437,lcl|c234064_g1_i2|m.19394,lcl|c235115_g6_i1|m.20588,lcl|c221676_g4_i8|m.7788,lcl|c214211_g3_i3|m.3396,lcl|c229592_g3_i11|m.14442,lcl|c226071_g2_i11|m.11178,lcl|c221676_g4_i5|m.7787,lcl|c229025_g3_i1|m.13888,lcl|c221676_g4_i4|m.7786,lcl|c226071_g2_i7|m.11182,lcl|c243541_g3_i2|m.31058,lcl|c224773_g5_i3|m.10121,lcl|c220695_g1_i1|m.7091,lcl|c238843_…	A5A6I5,Q9SAF5,A5UCG6,B1JJM7,Q9SX33,B8D894,Q54LE6,A9N1J6,E7F9L8,Q54V86,F1PRN2,O14786,Q5SYD0,P42861,P41413,P05696,Q8T6H3,P98200,P28693,Q9UBC5,Q8NF91,P98204,Q92608,Q3MHJ9,P62490,P39688,Q8T6H8,O00159,P40792,O35598,O00160,A5DKH0,P61158,A1JRV9,P61157,Q9LZJ5,P59083,Q31TX1,O75923,Q12965,A1DBH2,Q6BUQ2,Q83IN9,Q5PL07,Q0III9,O60423,P62491,P0A6T1,P62492,P0A6T2,P19706,P62493,B5QYI4,P62494,Q23979,Q23978,A7MPC2,…	A5A6I5,Q9SAF5,A5UCG6,B1JJM7,Q9SX33,B8D894,Q54LE6,A9N1J6,E7F9L8,Q54V86,Q9DB30,A5GFW1,P49138,F1PRN2,O14786,Q5SYD0,P42861,P05696,Q8T6H3,P98200,P28693,Q9UBC5,Q8NF91,P98204,Q92608,Q3MHJ9,P62490,P18652,P39688,Q8T6H8,P18653,P18654,O00159,P40792,O35598,O00160,A5DKH0,O61661,P61158,A1JRV9,P61157,Q9LZJ5,P59083,P0C605,Q31TX1,O75923,Q12965,A1DBH2,Q6BUQ2,Q83IN9,Q5PL07,Q0III9,O60423,P62491,P0A6T1,P62492,P0A6T2,…
GO:1902512	biological_process	positive regulation of apoptotic DNA fragmentation	4.79e-05	4	3.67e-05	3	-0.384817	0.726	1	5.38e-05	4.39e-05	-0.294778	0.76	1	0.944	VIGAEQGGLR,VLNDVQDMK	VIGAEQGGLR,VLNDVQDMK	lcl|c229541_g1_i10|m.14379,lcl|c229541_g1_i8|m.14382,lcl|c229541_g1_i2|m.14380	lcl|c229541_g1_i10|m.14379,lcl|c229541_g1_i8|m.14382,lcl|c229541_g1_i2|m.14380	Q00613,P38529	Q00613,P38529
GO:1903843	biological_process	cellular response to arsenite ion	0.00264658	221	0.00262923	215	-0.00948897	0.945	1	0.00239093	0.0023705	-0.0123787	0.928	1	0.992	EMVELPLR,LAGESESNLR,LLVEEAINDDNSVVSMSQAK,GILLYGPPGTGK,QENPDLDMEVEDEDPVPEIRR,LDQLIYIPLPDEGSR,SVSDNDIR,NSPAIIFIDEIDAIAPK,DHFEEAMK,IHVLPIDDTVEGLTGNL,AFEEAEK,LGDDVDLEQIAAETHG,KAFEEAEK,ETVVEVPTTTWDDIGGLENVKR,IVSQLLTLMDGLK,EVDIGIPDATGR,DVDLDYVAK,ETVVEVPTTTWDDIGG,FDREVDIGIPDATGR,LGDIVSVQACPDVK,RSVSDNDIR,YAMGVSNPSALR,MDLIDLEDEQIDAEVLDSLA,EVDIGIPDATGRLEILR,QENPDLDMEVEDEDPVPEIR,ELQELVQYPVEHPDK,LLVEEAINDDNS…	EMVELPLR,EVDIGIPDATGRLEI,LAGESESNLR,IHVLPIDDTVEGLTGN,LLVEEAINDDNSVVSMSQAK,GILLYGPPGTGK,LDQLIYIPLPDEGSR,SVSDNDIR,DHFEEAMK,IHVLPIDDTVEGLTGNL,FDREVDIGIPDATG,AFEEAEK,LGDDVDLEQIAAETHG,KAFEEAEK,ETVVEVPTTTWDDIGGLENVKR,IVSQLLTLMDGLK,EVDIGIPDATGR,DVDLDYVAK,IHVLPIDDTVEGLTGNLF,FDREVDIGIPDATGR,LGDIVSVQACPDVK,RSVSDNDIR,YAMGVSNPSALR,LLVEEAINDDNSVV,EVDIGIPDATGRLEIL,LGDDVDLEQIAAETHGY,ETVVEVPTTTWDDIGGLENVK,MEELQL…	lcl|c233948_g1_i1|m.19235,lcl|c233948_g1_i1|m.19236,lcl|c233948_g1_i2|m.19238,lcl|c229538_g7_i4|m.14373,lcl|c235754_g3_i10|m.21302,lcl|c235754_g3_i1|m.21301,lcl|c234626_g4_i3|m.20042	lcl|c233948_g1_i1|m.19235,lcl|c233948_g1_i1|m.19236,lcl|c233948_g1_i2|m.19238,lcl|c229538_g7_i4|m.14373,lcl|c235754_g3_i10|m.21302,lcl|c235754_g3_i1|m.21301,lcl|c234626_g4_i3|m.20042	Q9SCN8,Q9P3A7,P54774,Q5R658,P25694,Q9UN37,Q7KN62,Q7ZU99,Q793F9,P54812,P54811,Q8VEJ9,Q96372,A0JMA9,P23787,P46467,P55072,P03974,P46462,O75351,Q01853,Q0VD48,Q3ZBT1,P54609,Q9LZF6,Q6GL04,Q5AWS6	Q9SCN8,Q9P3A7,P54774,Q5R658,P25694,Q9UN37,Q7KN62,Q7ZU99,Q793F9,P54812,P54811,Q8VEJ9,Q96372,A0JMA9,P23787,P46467,P55072,P03974,P46462,O75351,Q01853,Q0VD48,Q3ZBT1,P54609,Q9LZF6,Q6GL04,Q5AWS6
GO:0006641	biological_process	triglyceride metabolic process	0.00294597	246	0.002617	214	-0.170827	0.204	1	0.00266018	0.00235953	-0.173025	0.198	1	0.738	TATMTVGPK,GVDVWTVNPEDK,IIVMTTK,ASEIESLAR,ETTVVWDK,VGPPIISTEIK,IISFTELEELGK,VLLEQAPK,WNPFDLTK,LVDEPPPPLAPR,FFDIPMSVLPTVR,EFELTSDTNPIPR,AVGITNQR,QSPDTMTTGFGAPIDTK,EAETMILDK,TSASEQLSEYAK,LGTNYIQLPVNCPYK,INAAAIEDR,AGQLAGSDPDYNNR,EGERPENK,GVIIGLTQFTNK,YPLNSTDPTTER,GPILLQDAQF,FIIADGSLLGK,TSPGGPYAWLTYNEVLER,AASQGNTAAR,ASEQLSEFAQSR,DFGPLVGAIDQGTSSSR,SGTVVQLR,DGEVTHIK,ATSDEVGVK,ATLEATCFQTR,IWPHSEYPLIPVGK,…	TATMTVGPK,GVDVWTVNPEDK,IIVMTTK,ASEIESLAR,VGPPIISTEIK,IISFTELEELGK,VLLEQAPK,NGQIIEMK,TSTMTVGPK,WNPFDLTK,LVDEPPPPLAPR,FFDIPMSVLPTVR,EFELTSDTNPIPR,AVGITNQR,QSPDTMTTGFGAPIDTK,FSAEELESWNLLTR,EAETMILDK,TSASEQLSEYAK,LGTNYIQLPVNCPYK,INAAAIEDR,AGQLAGSDPDYNNR,EGERPENK,GVIIGLTQFTNK,YPLNSTDPTTER,TPFNATR,GPILLQDAQF,FIIADGSLLGK,TSPGGPYAWLTYNEVLER,ETTVVWDKLTGEPLHNAI,MGSQVTEEENTTAK,DFGPLVGAIDQGTSSSR,SGTVVQLR,DGE…	lcl|c239816_g8_i1|m.26351,lcl|c239816_g8_i5|m.26357,lcl|c239816_g8_i3|m.26354,lcl|c237550_g1_i2|m.23394,lcl|c237550_g1_i1|m.23390,lcl|c238296_g3_i11|m.24348,lcl|c229561_g1_i2|m.14409,lcl|c216784_g1_i4|m.4763,lcl|c226184_g5_i3|m.11275,lcl|c216784_g1_i1|m.4762,lcl|c240852_g1_i3|m.27810,lcl|c229658_g3_i2|m.14487,lcl|c225136_g5_i1|m.10393,lcl|c239835_g2_i1|m.26401,lcl|c225136_g5_i6|m.10396,lcl|c23289…	lcl|c225677_g1_i1|m.10817,lcl|c237550_g1_i2|m.23394,lcl|c237550_g1_i1|m.23390,lcl|c229561_g1_i2|m.14409,lcl|c216784_g1_i4|m.4763,lcl|c216784_g1_i1|m.4762,lcl|c240852_g1_i3|m.27810,lcl|c225136_g5_i6|m.10396,lcl|c229658_g3_i1|m.14486,lcl|c238200_g3_i4|m.24238,lcl|c238296_g3_i2|m.24349,lcl|c213883_g1_i1|m.3267,lcl|c225136_g5_i9|m.10397,lcl|c239816_g8_i1|m.26351,lcl|c239816_g8_i5|m.26357,lcl|c239816_…	Q9PWF7,Q64405,P13706,Q8JZR0,Q9JID6,P18163,P35235,Q14409,P32189,Q06124,O97492,Q27487,Q2I6W4,P41499,P90682,O61235,O57656,O88813,Q63060,O60488,P04040,Q9UKU0,Q14410,P41216,Q5RF10,P04762,Q9WU65,Q64516,Q9PT92,P24270,P33124,P33121,Q0IID9,O62839,Q91WC3,Q4R4D5,P17336,Q9UBV2,Q9ULC5,P9WKB9,P9WKB8,P00432,Q90687	Q9PWF7,Q64405,P13706,Q8JZR0,Q9JID6,P18163,P35235,Q14409,P32189,Q06124,O97492,Q27487,Q2I6W4,P41499,P90682,O61235,Q99685,O60488,O57656,O88813,Q63060,P0A651,P04040,Q9UKU0,Q14410,P9WKC9,P41216,Q5RF10,P04762,Q70VZ7,Q9WU65,Q64516,Q9PT92,P24270,P33124,P33121,Q0IID9,O62839,Q91WC3,Q4R4D5,P17336,Q5ZLL8,Q9ULC5,P9WKB9,P9WKB8,P00432,Q90687
GO:1902513	biological_process	regulation of organelle transport along microtubule	0.000563	47	0.000648	53	0.203552	0.481	1	0.000517	0.000593	0.197075	0.491	1	0.892	LGGDYLCK,ILLVGDPQVGK,EIEWESSGFLLHDR,NNEMHFEVK,IEPFVHK,ADAFDKDGTVQCPS,SAFTDMR,DAQSITFK	LGGDYLCK,ILLVGDPQVGK,NNEMHFEVK,IEPFVHK,ADAFDKDGTVQCPS,SAFTDMR,DAQSITFK	lcl|c232597_g5_i3|m.17584,lcl|c232597_g5_i16|m.17583,lcl|c232597_g5_i12|m.17581,lcl|c232597_g5_i12|m.17580,lcl|c226287_g1_i2|m.11357,lcl|c232597_g5_i4|m.17585,lcl|c226287_g1_i1|m.11356,lcl|c232597_g5_i6|m.17587,lcl|c232597_g5_i6|m.17586,lcl|c232597_g5_i15|m.17582,lcl|c226287_g1_i3|m.11358	lcl|c232597_g5_i3|m.17584,lcl|c232597_g5_i12|m.17580,lcl|c226287_g1_i2|m.11357,lcl|c232597_g5_i4|m.17585,lcl|c226287_g1_i1|m.11356,lcl|c232597_g5_i6|m.17586,lcl|c232597_g5_i15|m.17582,lcl|c226287_g1_i3|m.11358	P11438,Q8BG51,Q6NVC5,Q5ZM73,Q2HJF8,Q5ZM83,Q8IXI2	P11438,Q8BG51,Q6NVC5,Q5ZM73,Q2HJF8,Q5ZM83,Q8IXI2
GO:1903844	biological_process	regulation of cellular response to transforming growth factor beta stimulus	0.00662244	553	0.00734961	601	0.150306	0.0759	1	0.00596655	0.00660667	0.147027	0.0823	1	0.483	QELTDFK,LGIHEDSVNR,EGIPPDQQR,ITDFGTAK,VPVGDQPPDIEMLIR,LFNLEDESAEPDLLK,QTNTSQWEMPSDEAATKV,VDGYVDPSGGSR,APFDLFENR,QASAQQPALGYAPQPGAPPAVVPSVSSSLYPSLV,VDQMAQAQAR,LVEFENATK,QTNTSQWEMPSDEAATK,DNSTLGYMAAK,GMEDLIPIMNK,QTTDQGSYTPLDNASVGLK,EIVAETDRETGSNK,ASTAIDSPAASNAVGSGK,EIAAAETAQQTASEK,GMTTSNNLLGK,TCADNDECANPEINK,FNTLTGNLLNGEEVNR,IAVIPFSTDAK,EVDEVVLVGGSTR,AIEGGGDSIDTK,LSKDDIDR,IQDKEGIPPDQQR,VASDQDLK,FEV…	QELTDFK,LGIHEDSVNR,EGIPPDQQR,HLEVNPDHSIVET,MAEYFEK,VDGYVDPSGGSR,APFDLFENR,QASAQQPALGYAPQPGAPPAVVPSVSSSLYPSLV,VDQMAQAQAR,QTNTSQWEMPSDEAATK,VFIMDNCEDIIPEYLNFIK,DNSTLGYMAAK,QTTDQGSYTPLDNASVGLK,ASTAIDSPAASNAVGSGK,EIAAAETAQQTASEK,TCADNDECANPEINK,HLEVNPDHSIVETLR,FNTLTGNLLNGEEVNR,IAVIPFSTDAK,AIEGGGDSIDTK,YHSSASGDEMTSL,IQDKEGIPPDQQR,TISEDSKK,VASDQDLK,FEVTITPPPFVAR,IQDKEGIPPDQQ,AASSSNVLPVQLDSQGR,VLSLQSSLI…	lcl|c240483_g1_i8|m.27301,lcl|c231891_g1_i1|m.16759,lcl|c221890_g1_i1|m.7971,lcl|c227548_g2_i4|m.12564,lcl|c231881_g1_i2|m.16748,lcl|c214032_g1_i4|m.3331,lcl|c230982_g4_i7|m.15848,lcl|c240251_g4_i1|m.26961,lcl|c228038_g3_i1|m.12994,lcl|c240483_g1_i7|m.27299,lcl|c240259_g4_i6|m.26975,lcl|c240251_g4_i2|m.26962,lcl|c229550_g1_i3|m.14392,lcl|c233478_g1_i2|m.18597,lcl|c224456_g4_i3|m.9819,lcl|c226044_…	lcl|c240483_g1_i8|m.27301,lcl|c231891_g1_i1|m.16759,lcl|c221890_g1_i1|m.7971,lcl|c227548_g2_i4|m.12564,lcl|c238140_g3_i2|m.24147,lcl|c231881_g1_i2|m.16748,lcl|c238140_g3_i3|m.24152,lcl|c214032_g1_i4|m.3331,lcl|c230982_g4_i7|m.15848,lcl|c240251_g4_i1|m.26961,lcl|c228038_g3_i1|m.12994,lcl|c240483_g1_i7|m.27299,lcl|c232986_g1_i4|m.17993,lcl|c240259_g4_i6|m.26975,lcl|c240251_g4_i2|m.26962,lcl|c229550…	Q61555,P07901,Q5R613,P07900,O73885,Q07078,Q6P8X1,Q5NVM9,Q5R7D3,P62992,Q4R888,P17156,Q9N1U2,Q7YQC6,P26413,Q1JQE0,Q28222,P16627,Q9U639,P04809,Q01877,P39054,P39053,A2Q0Z1,P39055,Q9Z254,P39052,Q91233,P82995,P36181,Q4R4P1,P08418,Q5R710,Q6YHK3,O00560,P11147,P14659,Q9UQ16,Q7PT10,O61998,P22954,O02192,Q24789,Q05944,Q5R7R9,Q9Y5X3,Q5ZL33,P79781,P22953,Q04619,Q9BLC5,P41753,Q9CSN1,P34933,O00339,P34931,P34930,…	Q61554,Q61555,Q14204,P07901,Q5R613,P07900,P49140,O73885,M0R8U1,Q07078,Q6P8X1,Q5NVM9,P38650,Q5R7D3,P62992,Q4R888,P17156,Q9N1U2,Q7YQC6,Q9C1M7,P26413,Q1JQE0,Q28222,P34036,P16627,Q9U639,Q9P225,P04809,P37276,P39057,Q01877,P39054,P39053,A2Q0Z1,Q27802,P39055,E9Q8T7,P45444,Q9Z254,P39052,Q91233,P45443,Q9JHU4,P82995,P36181,Q4R4P1,Q8VHE6,P08418,Q5R710,P23098,P98133,Q6YHK3,O00560,P11147,P14659,Q9UQ16,Q7PT10,…
GO:0048437	biological_process	floral organ development	1.2e-05	1	2.45e-05	2	1.03022	0.551	1	2.15e-05	3.29e-05	0.612112	0.64	1	0.909	GGGQVIPTAR	GGGQVIPTAR,ILGENYTIEDEEDSR	lcl|c237851_g2_i4|m.23820,lcl|c237851_g2_i1|m.23817	lcl|c237851_g2_i4|m.23820,lcl|c237851_g2_i1|m.23817	Q15029,Q9LNC5,O94316,P13639,Q90705,A0SXL6,P29691,Q5F3X4,Q5R8Z3,Q3SYU2,O08810,P58252,F4JWP9,P13060,A4FUD3,P05197,Q5R6E0,Q23716,P09445,Q96X45	Q15029,Q9LNC5,O94316,P13639,Q90705,A0SXL6,P29691,Q5F3X4,Q5R8Z3,Q3SYU2,O08810,P58252,F4JWP9,P13060,A4FUD3,P05197,Q5R6E0,Q23716,P09445,Q96X45
GO:1902510	biological_process	regulation of apoptotic DNA fragmentation	0.000168	14	7.34e-05	6	-1.19217	0.0815	1	0.000162	7.68e-05	-1.07239	0.0966	1	0.528	VIGAEQGGLR,VGSNPESFIYESDVLTK,DLLGDEFVDPVR,YLIPDPVIEYIK,VLNDVQDMK	VIGAEQGGLR,DLLGDEFVDPVR,VLNDVQDMK	lcl|c229541_g1_i10|m.14379,lcl|c229541_g1_i8|m.14382,lcl|c229461_g3_i2|m.14279,lcl|c229541_g1_i2|m.14380	lcl|c229541_g1_i10|m.14379,lcl|c229541_g1_i8|m.14382,lcl|c229461_g3_i2|m.14279,lcl|c229541_g1_i2|m.14380	Q9HAN9,Q00613,P38529	Q9HAN9,Q00613,P38529
GO:0061418	biological_process	regulation of transcription from RNA polymerase II promoter in response to hypoxia	0.0049818	416	0.00572316	468	0.200146	0.0388	1	0.00449107	0.00514706	0.19669	0.0422	1	0.361	LPDFFVR,NYTQNIDTLER,SESEIKETNAR,EGIPPDQQR,TTANGIYCPPK,VQEEYIKDEQK,DYVIEEDFMK,YEAANWK,FENLGIAPPK,AVENSGTIVGIK,IVDKDGIQDVSIPNK,GVNTFSPEGR,DYALTSGTIK,EIADAAEK,SDASLVSPVAPGSGAPTPQR,YNENLELEDAIH,LEGGSGGDSEVQR,AIGSGSEGAQQALEEVYHK,STYGSPIPLK,EATTVYELK,LNATNVELATATPDR,AVASQLDANFLK,GVLLYGPPGTGK,LTVEDPVTLEYITR,IQDKEGIPPDQQR,EVIELPLTNPELFQR,AINQGGLTSIGLR,VGQAVDVVGQAGKPK,IQDKEGIPPDQQ,AMEVDERPTEQY,EVVSLYQTLIK…	TTIFLDCK,LPDFFVR,SESEIKETNAR,EGIPPDQQR,TTANGIYCPPK,FVVDLDK,DYVIEEDFMK,YEAANWK,FENLGIAPPK,AVENSGTIVGIK,IVDKDGIQDVSIPNK,VVGSEFVQK,GVNTFSPEGR,DYALTSGTIK,EIADAAEK,SDASLVSPVAPGSGAPTPQR,LEGGSGGDSEVQR,AIGSGSEGAQQALEEVYHK,STYGSPIPLK,LNATNVELATATPDR,AVASQLDANFLK,GVLLYGPPGTGK,LTVEDPVTLEYITR,IQDKEGIPPDQQR,EVIELPLTNPELFQR,AINQGGLTSIGLR,VGQAVDVVGQAGKPK,HGDIDYEAVVK,IQDKEGIPPDQQ,AMEVDERPTEQY,LVGLYLDTK,ILLELLNQM…	lcl|c222581_g2_i12|m.8452,lcl|c204019_g3_i1|m.1367,lcl|c219583_g2_i1|m.6468,lcl|c232931_g1_i9|m.17924,lcl|c212126_g1_i2|m.2626,lcl|c239908_g1_i5|m.26518,lcl|c216194_g2_i1|m.4425,lcl|c223200_g1_i1|m.8933,lcl|c214032_g1_i4|m.3331,lcl|c214356_g7_i4|m.3462,lcl|c223433_g6_i1|m.9115,lcl|c201155_g1_i1|m.1182,lcl|c229870_g2_i3|m.14711,lcl|c214356_g7_i5|m.3463,lcl|c234851_g1_i5|m.20338,lcl|c232854_g3_i11|…	lcl|c222581_g2_i12|m.8452,lcl|c204019_g3_i1|m.1367,lcl|c219583_g2_i1|m.6468,lcl|c232931_g1_i9|m.17924,lcl|c212126_g1_i2|m.2626,lcl|c239908_g1_i5|m.26518,lcl|c216194_g2_i1|m.4425,lcl|c223200_g1_i1|m.8933,lcl|c214032_g1_i4|m.3331,lcl|c214356_g7_i4|m.3462,lcl|c223433_g6_i1|m.9115,lcl|c201155_g1_i1|m.1182,lcl|c214356_g7_i5|m.3463,lcl|c234851_g1_i5|m.20338,lcl|c232854_g3_i11|m.17840,lcl|c224263_g3_i1|…	O48844,P54775,Q2KIW6,P46470,O42587,Q9MAT0,Q8BG32,Q5E9F9,Q63570,Q4FZT9,P54814,P62198,P62992,Q6XJG8,P46507,P62194,Q3T030,Q9MAK9,P62195,F6XBL2,P62196,P62197,Q9Z2U1,Q5F418,Q13200,Q54JM5,O43242,Q9C5U3,P60901,O00231,P14685,O17071,Q4R834,Q5R9I6,F6P3G4,P87048,P48556,P49722,P49721,P60900,O88761,Q2KJ46,Q2KI42,Q3ZBG0,F1LMZ8,P28066,Q9V3P6,Q8VDM4,P35998,Q8IXJ6,P62333,Q5E987,Q7S8R8,P40307,P25788,Q54BC6,P62978,…	O48844,P54775,Q2KIW6,P46470,O42587,Q9MAT0,Q8BG32,Q5E9F9,Q63570,Q4FZT9,P54814,P62198,P62992,Q6XJG8,P46507,P62194,Q3T030,Q9MAK9,P62195,F6XBL2,P62196,P62197,Q9Z2U1,Q5F418,Q13200,Q54JM5,O43242,Q9C5U3,P60901,O00231,P14685,O17071,Q5R9I6,F6P3G4,P87048,P48556,P49722,P49721,P60900,O88761,Q2KJ46,Q2KI42,Q3ZBG0,F1LMZ8,P28066,Q9V3P6,Q8VDM4,P35998,P62333,Q5E987,Q7S8R8,P40307,P25788,Q54BC6,P62978,P62979,P79781,…
GO:1902511	biological_process	negative regulation of apoptotic DNA fragmentation	0.00012	10	3.67e-05	3	-1.70674	0.0569	1	0.000118	4.39e-05	-1.43228	0.0765	1	0.464	VGSNPESFIYESDVLTK,DLLGDEFVDPVR,YLIPDPVIEYIK	DLLGDEFVDPVR	lcl|c229461_g3_i2|m.14279	lcl|c229461_g3_i2|m.14279	Q9HAN9	Q9HAN9
GO:1903842	biological_process	response to arsenite ion	0.00311362	260	0.00303279	248	-0.0379508	0.767	1	0.00281095	0.00273266	-0.0407544	0.749	1	0.944	EMVELPLR,LAGESESNLR,LLVEEAINDDNSVVSMSQAK,GILLYGPPGTGK,QENPDLDMEVEDEDPVPEIRR,LDQLIYIPLPDEGSR,SVSDNDIR,NSPAIIFIDEIDAIAPK,DHFEEAMK,IHVLPIDDTVEGLTGNL,QKELESICNPIITK,CNEVVSWLDTQPDASKELYER,ELESICNPIITK,AFEEAEK,GMTTSNNLLGK,LGDDVDLEQIAAETHG,KAFEEAEK,ETVVEVPTTTWDDIGGLENVKR,IVSQLLTLMDGLK,EVDIGIPDATGR,DVDLDYVAK,ETVVEVPTTTWDDIGG,ITITNDKGR,EVDEVVLVGGSTR,FDREVDIGIPDATGR,LSKDDIDR,LGDIVSVQACPDVK,RSVSDNDIR,YAMGVS…	EMVELPLR,EVDIGIPDATGRLEI,LAGESESNLR,IHVLPIDDTVEGLTGN,LLVEEAINDDNSVVSMSQAK,GILLYGPPGTGK,LDQLIYIPLPDEGSR,SVSDNDIR,DHFEEAMK,IHVLPIDDTVEGLTGNL,QKELESICNPIITK,FDREVDIGIPDATG,ITITNDK,ELESICNPIITK,AFEEAEK,LGDDVDLEQIAAETHG,KAFEEAEK,ETVVEVPTTTWDDIGGLENVKR,IVSQLLTLMDGLK,EVDIGIPDATGR,DVDLDYVAK,ITITNDKGR,IHVLPIDDTVEGLTGNLF,FDREVDIGIPDATGR,LGDIVSVQACPDVK,RSVSDNDIR,YAMGVSNPSALR,LLVEEAINDDNSVV,EVDIGIPDATGRLEIL,…	lcl|c231881_g1_i2|m.16748,lcl|c233948_g1_i1|m.19235,lcl|c233948_g1_i1|m.19236,lcl|c233948_g1_i2|m.19238,lcl|c229538_g7_i4|m.14373,lcl|c235754_g3_i10|m.21302,lcl|c235754_g3_i1|m.21301,lcl|c234626_g4_i3|m.20042	lcl|c231881_g1_i2|m.16748,lcl|c233948_g1_i1|m.19235,lcl|c233948_g1_i1|m.19236,lcl|c233948_g1_i2|m.19238,lcl|c229538_g7_i4|m.14373,lcl|c235754_g3_i10|m.21302,lcl|c235754_g3_i1|m.21301,lcl|c234626_g4_i3|m.20042	Q9SCN8,P54774,Q5R658,P25694,P0DMV8,P54652,P0DMV9,Q7KN62,O73885,Q793F9,P19378,P54812,Q557E0,Q5B2V1,P54811,Q5NVM9,Q5R7D3,Q4R888,P17156,Q96372,Q9TUG3,Q9N1U2,Q7YQC6,A0JMA9,P23787,P0CB32,Q90473,P46467,P55072,P26413,P29843,P27322,P46462,Q28222,P16627,P0DMW0,P0DMW1,Q9U639,Q27965,P11142,Q01877,P17879,Q0VD48,Q3ZBT1,A2Q0Z1,Q9LZF6,P09189,Q91233,P63017,P63018,Q5AWS6,Q9P3A7,P08418,Q9UN37,Q7ZU99,P11147,P14659,…	Q9SCN8,P54774,Q5R658,P25694,P0DMV8,P54652,P0DMV9,Q7KN62,O73885,Q793F9,P19378,P54812,Q557E0,Q5B2V1,P54811,Q5NVM9,Q5R7D3,Q4R888,P17156,Q96372,Q9TUG3,Q9N1U2,Q7YQC6,A0JMA9,P23787,P0CB32,Q90473,P46467,P55072,P26413,P29843,P27322,P46462,Q28222,P16627,P0DMW0,P0DMW1,Q9U639,Q27965,P11142,Q01877,P17879,Q0VD48,Q3ZBT1,A2Q0Z1,Q9LZF6,P09189,Q91233,P63017,P63018,Q5AWS6,Q9P3A7,P08418,Q9UN37,Q7ZU99,P11147,P14659,…
GO:0061419	biological_process	positive regulation of transcription from RNA polymerase II promoter in response to hypoxia	0	0	1.22e-05	1	null	0.312	1	1.08e-05	2.19e-05	1.02715	0.553	1	0.892		NEQEMQQLIIEEK		lcl|c224337_g8_i7|m.9748		P31266
GO:0006644	biological_process	phospholipid metabolic process	0.0123587	1032	0.011055	904	-0.160828	0.0138	1	0.0111254	0.00993196	-0.163701	0.0122	1	0.167	VVPEFDTPGHTF,GIIYIQADNPDIGLM,ITGLDPALPFYTGSDNDVHLDK,SDLDAQR,IQQAEADLR,SWDDFFTR,IPGFCNGCPER,DMNELDADEGR,TQLVDGSYYSATHNIRDDPAAPNMSQGYLAQVAAR,EFVYISQDPKDQLLLGPAYATPK,ASQAEFDR,TEGISTSDLIAR,LQIWDTAGQER,VLSPPSAYLTSYTVWGALR,IISFTELEELGK,KAAVNPSK,ATEFYIK,TWYDDQEK,GQPVDATDR,DNTCTGCADPEGTCER,AEETHPTGDFYLETSPLYTLCPK,VAQWLPSDPK,LVTTAANR,QYTEEQLGTSEK,SATGTSVEK,TVTEECPNKFK,VGQWLPSDKK,ITGLDPALPFY,GCPLMGFK,QLEGI…	VLHLSDFYPPK,AGLKLEDIDVF,GPQELSDSMK,VVPEFDTPGHTF,GIIYIQADNPDIGLM,ITGLDPALPFYTGSDNDVHLDK,SDLDAQR,IQQAEADLR,IPGFCNGCPER,DMNELDADEGR,ALAMGFKPK,TQLVDGSYYSATHNIRDDPAAPNMSQGYLAQVAAR,ASQAEFDR,LQIWDTAGQER,ITGLDPALPFYTGSDNDVHLDKTDGQ,VLSPPSAYLTSYTVWGALR,IISFTELEELGK,ATEFYIK,IAKVDPADK,GQPVDATDR,AEETHPTGDFYLETSPLYTLCPK,TIGTAALAIVK,VAQWLPSDPK,LVTTAANR,QYTEEQLGTSEK,TVTEECPNKFK,KGDQLGMFHFGG,VGQWLPSDKK,TVTEECPNKF…	lcl|c243671_g5_i1|m.31222,lcl|c236088_g1_i1|m.21668,lcl|c217024_g2_i5|m.4908,lcl|c231210_g4_i4|m.16042,lcl|c222854_g1_i1|m.8663,lcl|c205713_g1_i1|m.1484,lcl|c225136_g5_i6|m.10396,lcl|c164477_g1_i1|m.439,lcl|c243393_g3_i1|m.30930,lcl|c218302_g5_i2|m.5710,lcl|c209513_g1_i2|m.1987,lcl|c238296_g3_i2|m.24349,lcl|c219817_g1_i3|m.6593,lcl|c224624_g4_i1|m.10025,lcl|c227910_g4_i2|m.12882,lcl|c238381_g2_i2…	lcl|c243671_g5_i1|m.31222,lcl|c231210_g4_i4|m.16042,lcl|c222854_g1_i1|m.8663,lcl|c233521_g3_i3|m.18674,lcl|c205713_g1_i1|m.1484,lcl|c225136_g5_i6|m.10396,lcl|c223679_g2_i2|m.9306,lcl|c223679_g2_i1|m.9304,lcl|c243393_g3_i1|m.30930,lcl|c225918_g2_i6|m.11053,lcl|c209513_g1_i2|m.1987,lcl|c238296_g3_i2|m.24349,lcl|c219817_g1_i3|m.6593,lcl|c233555_g4_i1|m.18705,lcl|c224624_g4_i1|m.10025,lcl|c227910_g4_…	Q5R8Z8,Q60587,P70182,P13706,Q8JZR0,Q99JY0,Q9JID6,P18163,O46629,Q6NYB7,O60762,Q9JL55,O88813,P61028,Q5ZIT5,P61027,P61026,Q9UKU0,Q8HXX4,Q8BLR2,P41216,P61106,Q96A23,Q9FR44,Q5R5U1,O75131,O02811,Q29554,Q9ULC5,Q29548,P24409,Q6P8U6,Q5ZKU5,P91580,P55084,Q9HB21,Q9UBL6,P07686,P81139,Q0V8R6,Q9WTN0,Q8BYI6,Q5R8P5,P20060,Q9Y5K3,P0DPA6,P54318,P00606,P00607,O57656,Q6P4A8,Q15286,P25228,P61006,Q17RR3,Q9Y371,Q5R6L8,…	Q5R8Z8,Q60587,Q14642,P70182,P13706,Q8JZR0,Q99JY0,Q9JID6,P18163,O46629,Q6NYB7,O60762,O88813,Q08758,P61028,Q5ZIT5,P61027,P61026,Q9UKU0,Q8HXX4,Q8BLR2,P41216,P61106,Q96A23,Q5RED7,Q9FR44,Q5R5U1,O75131,Q8C5L6,Q29554,Q9ULC5,Q29548,P24409,Q6P8U6,Q5ZKU5,P91580,P55084,Q9HB21,Q9UBL6,P07686,P81139,Q0V8R6,Q9WTN0,Q5R8P5,P20060,P0DPA6,P59644,P54318,P00606,P04180,P58044,O57656,Q6P4A8,Q5F356,Q15286,P25228,P61006,…
GO:1902514	biological_process	regulation of calcium ion transmembrane transport via high voltage-gated calcium channel	0.000886	74	0.000917	75	0.0495861	0.834	1	0.000808	0.000834	0.0462585	0.844	1	0.968	GGYFDEYGIIR,WDGVPFILK,LQPNEAVYVK,VVIEKPFGK,LITSITTGDFETYCK,FGYLDDSTVPK,SASGSTVTSQGTQGGK,EQQIIQLTQK,IQFHDAPGDIFEGR,LTAFEPEAR,DLESSNELSNHLA,IFGPVWCR,SELTVEK,LFYLALPPSVFIDASENIK,AGAYDYPSPEWDTVTDEAK,EMVQNLMVLR,IGSSGAPVTDQSEETR,DLTFDEFVTNFNK,SPPSGRPAPPQ,LTTSSQEK	LTQRIGSSGAPVTDQSEETR,GGYFDEYGIIR,WDGVPFILK,LQPNEAVYVK,VVIEKPFGK,DIKPENL,FGYLDDSTVPK,DIKPENLL,LNTELDKLGEGKDVVNR,SASGSTVTSQGTQGGK,EQQIIQLTQK,IQFHDAPGDIFEGR,LTAFEPEAR,DLESSNELSNHLA,EMVQNLMVLR,IGSSGAPVTDQSEETR,KLNTELDK,SPPSGRPAPPQ,LTTSSQEK	lcl|c218776_g1_i7|m.5956,lcl|c218776_g1_i6|m.5955,lcl|c217591_g3_i12|m.5270,lcl|c217591_g3_i7|m.5275,lcl|c217591_g3_i7|m.5274,lcl|c217591_g3_i2|m.5272,lcl|c228653_g2_i7|m.13499,lcl|c217326_g3_i1|m.5105,lcl|c228653_g2_i5|m.13498,lcl|c237587_g5_i1|m.23455	lcl|c218776_g1_i7|m.5956,lcl|c234064_g1_i4|m.19396,lcl|c218776_g1_i6|m.5955,lcl|c217591_g3_i12|m.5270,lcl|c210586_g1_i2|m.2213,lcl|c234064_g1_i2|m.19394,lcl|c217591_g3_i7|m.5274,lcl|c210586_g1_i1|m.2212,lcl|c239574_g1_i2|m.26000,lcl|c210586_g1_i4|m.2214,lcl|c242662_g1_i1|m.30100,lcl|c229547_g1_i1|m.14385,lcl|c221676_g4_i8|m.7788,lcl|c226454_g2_i17|m.11487,lcl|c234064_g1_i1|m.19391,lcl|c241464_g1_…	A8WXF6,Q6PHZ2,Q13557,Q08289,Q5RCC4,Q95266,P15791,P05370,Q923T9,Q9MZL5,O77708,Q6DEH3,P28652,P54288,Q3MHJ9,O08539,P11730,O08839,P11798,P11275,Q9UQM7,Q2HJF7,Q00168,Q5ZKI0,Q9DG02,P08413,Q8VGC3	P11801,Q6GPN6,Q15418,Q96BR1,Q13557,O75582,Q63531,Q09137,Q08289,Q5RCC4,Q6DE87,P05370,Q21734,Q9DB30,A5GFW1,P49138,Q923T9,Q15349,P28652,Q3MHJ9,D2I3C6,P11730,O08839,Q9JLM8,P18652,Q6PFQ0,Q9UQM7,P18653,Q2HJF7,P18654,P13234,Q5ZKI0,Q9DG02,Q5R7A7,Q5MPA9,O61661,Q16566,P08413,Q8VGC3,P0C605,A8WXF6,Q9WUT3,Q8IW41,Q6PHZ2,Q13976,Q8BRK8,A8X6H4,Q91ZN7,Q66JF3,Q95266,P15791,Q28948,Q7TPS0,Q9MZL5,O77708,Q6DEH3,Q0V7M1,…
GO:1903845	biological_process	negative regulation of cellular response to transforming growth factor beta stimulus	0.00475426	397	0.00467147	382	-0.0253456	0.806	1	0.00428644	0.00420325	-0.0282743	0.784	1	0.944	QELTDFK,EGIPPDQQR,ITDFGTAK,VPVGDQPPDIEMLIR,LFNLEDESAEPDLLK,QTNTSQWEMPSDEAATKV,LVEFENATK,QTNTSQWEMPSDEAATK,GMEDLIPIMNK,QTTDQGSYTPLDNASVGLK,EIVAETDRETGSNK,EIAAAETAQQTASEK,GMTTSNNLLGK,TCADNDECANPEINK,FNTLTGNLLNGEEVNR,IAVIPFSTDAK,EVDEVVLVGGSTR,AIEGGGDSIDTK,LSKDDIDR,IQDKEGIPPDQQR,VASDQDLK,FEVTITPPPFVAR,IQDKEGIPPDQQ,AATGAADFSAK,SMAGEIGTLDPQMER,CLTGYQGSGR,TTLPNFK,ESTLHLVLR,GVDEVLLSGQK,TLSDYNIQK,IGELSEPV…	QELTDFK,EGIPPDQQR,GVDEVLLSGQK,TLSDYNIQK,MAEYFEK,VGLFTPDMAFEAIVK,IGELSEPVFTDSGIHL,SSADSFIR,EGDLGFFGPGQMQRPFEEAA,VTVLNPSNVR,QTNTSQWEMPSDEAATK,EEEEMR,QKELESICNPIITK,SSVLENFVGR,QTTDQGSYTPLDNASVGLK,ANPTSNSTSSSPQSPSTTSSSQPLKK,ITITNDK,ELESICNPIITK,EVVTTEGGIR,EIAAAETAQQTASEK,TCADNDECANPEINK,FNTLTGNLLNGEEVNR,IAVIPFSTDAK,ITITNDKGR,IVDFSPDGK,AIEGGGDSIDTK,TCEDIDECSVDR,STLQELASTESDCSSAR,LGEGENTMTKEEFQK,TCTDID…	lcl|c240251_g4_i1|m.26961,lcl|c228038_g3_i1|m.12994,lcl|c240483_g1_i7|m.27299,lcl|c240483_g1_i8|m.27301,lcl|c240259_g4_i6|m.26975,lcl|c240251_g4_i2|m.26962,lcl|c221890_g1_i1|m.7971,lcl|c224456_g4_i3|m.9819,lcl|c226044_g1_i4|m.11149,lcl|c240483_g1_i4|m.27290,sp|RS27A_HUMAN|,lcl|c240483_g1_i6|m.27294,lcl|c240259_g4_i5|m.26974,lcl|c231881_g1_i2|m.16748,lcl|c214032_g1_i4|m.3331,lcl|c240483_g1_i3|m.27…	lcl|c240483_g1_i8|m.27301,lcl|c221890_g1_i1|m.7971,lcl|c238140_g3_i2|m.24147,lcl|c231881_g1_i2|m.16748,lcl|c238140_g3_i3|m.24152,lcl|c214032_g1_i4|m.3331,lcl|c230982_g4_i7|m.15848,lcl|c240251_g4_i1|m.26961,lcl|c228038_g3_i1|m.12994,lcl|c240483_g1_i7|m.27299,lcl|c240259_g4_i6|m.26975,lcl|c232986_g1_i4|m.17993,lcl|c240251_g4_i2|m.26962,lcl|c210244_g1_i1|m.2148,lcl|c224456_g4_i3|m.9819,lcl|c226044_g…	Q61555,Q5R613,O73885,Q6P8X1,Q5NVM9,Q5R7D3,P62992,Q4R888,P17156,Q9N1U2,Q7YQC6,P26413,Q28222,P16627,Q9U639,Q01877,P39054,P39053,A2Q0Z1,P39055,P39052,Q91233,P08418,Q6YHK3,P11147,P14659,Q9UQ16,P22954,Q24789,Q05944,Q9Y5X3,Q5ZL33,P79781,P22953,P41753,P34933,O00339,P34931,P34930,Q5BIN5,Q04967,O65719,Q6S4N2,Q91291,P24629,Q9I8F9,P27619,P55063,Q9W6Y1,P22202,P0DMV8,P54652,P0DMV9,P50570,P19378,Q557E0,Q5B2V1,…	Q61554,Q61555,Q14204,Q5R613,P49140,O73885,M0R8U1,Q6P8X1,Q5NVM9,P38650,Q5R7D3,P62992,Q4R888,P17156,Q9N1U2,Q7YQC6,Q9C1M7,P26413,Q28222,P34036,P16627,Q9U639,Q9P225,P37276,P39057,Q01877,P39054,P39053,A2Q0Z1,Q27802,P39055,E9Q8T7,P45444,P39052,Q91233,P45443,Q9JHU4,Q8VHE6,P08418,P23098,P98133,Q6YHK3,P11147,P14659,Q9UQ16,Q9SMH5,Q9SMH3,Q8IVF4,P22954,Q24789,Q9JJ79,Q05944,P0C6F1,Q9Y5X3,Q5ZL33,P79781,P22953,…
GO:0006643	biological_process	membrane lipid metabolic process	0.00717331	599	0.00600443	491	-0.256612	0.00333	1	0.00646197	0.00539947	-0.259154	0.00301	1	0.0684	DVEAEVR,VVPEFDTPGHTF,ITGLDPALPFYTGSDNDVHLDK,EGNFDVVSGTR,ANPCSSYLAFK,KLLACDSDGLSDPYVR,IPGFCNGCPER,TSDGQLQPDPLR,DLGPQIGWK,SDLVQLFNNLATDEQDSV,TLIEELK,SVTDLTDAENR,EILQNSEVIAVNQDR,KLLACDSDGLSDPYV,ELFNVLSTQPVLNK,VLSPPSAYLTSYTVWGALR,ALVDKYEPLIMTNLEK,ATEFYIK,AEETHPTGDFYLETSPLYTLCPK,NNVSFFSK,MAELVHF,HYVNVPIILK,NEDVQLR,VAVLENQNK,LNADADVDVK,TVTEECPNKFK,YNDLAEK,FGAEWAQSQVIPK,SDLVQLFNNLATDEQDSVR,ITGLDPALPFYTG…	DVEAEVR,VLHLSDFYPPK,VVPEFDTPGHTF,FFGSPWAAPAWMK,ITGLDPALPFYTGSDNDVHLDK,EGNFDVVSGTR,ANPCSSYLAFK,FIFTITGQSSDVLEDAIER,IPGFCNGCPER,SDLVQLFNNLATDEQDSV,FTELQNAVGSEITK,TLIEELK,SVTDLTDAENR,KLLACDSDGLSDPYV,LGIYGDYGTK,ITGLDPALPFYTGSDNDVHLDKTDGQ,ELFNVLSTQPVLNK,VLSPPSAYLTSYTVWGALR,ALVDKYEPLIMTNLEK,ATEFYIK,AEETHPTGDFYLETSPLYTLCPK,NNVSFFSK,TIGTAALAIVK,EVIAVDQDKLGK,HYVNVPIILK,NEDVQLR,VAVLENQNK,YLGLYEDSFK,ITGLDPA…	lcl|c239667_g6_i1|m.26130,lcl|c229073_g2_i1|m.13946,lcl|c230890_g2_i1|m.15747,lcl|c222602_g2_i1|m.8466,lcl|c229507_g2_i4|m.14343,lcl|c215819_g3_i2|m.4218,lcl|c233334_g2_i7|m.18427,lcl|c205713_g1_i1|m.1484,lcl|c229507_g2_i10|m.14342,lcl|c229073_g2_i3|m.13948,lcl|c235769_g9_i1|m.21325,lcl|c215957_g2_i7|m.4321,lcl|c228772_g4_i3|m.13634,lcl|c215957_g2_i1|m.4319,lcl|c233334_g2_i17|m.18426,lcl|c238501_…	lcl|c239667_g6_i1|m.26130,lcl|c229073_g2_i1|m.13946,lcl|c218603_g6_i5|m.5857,lcl|c230890_g2_i1|m.15747,lcl|c229507_g2_i4|m.14343,lcl|c230890_g2_i2|m.15748,lcl|c241278_g2_i2|m.28378,lcl|c215819_g3_i2|m.4218,lcl|c233334_g2_i7|m.18427,lcl|c205713_g1_i1|m.1484,lcl|c229507_g2_i10|m.14342,lcl|c228577_g3_i1|m.13439,lcl|c229073_g2_i3|m.13948,lcl|c235769_g9_i1|m.21325,lcl|c215957_g2_i7|m.4321,lcl|c233555_…	P81139,Q0V8R6,Q13510,Q7TNP2,A0FGR8,P20060,Q3TZZ7,P54318,P54613,P54612,O60762,Q9NZ01,P26779,Q17RR3,Q92636,Q8IWB9,Q5R6L8,Q38845,P79145,O35242,P30153,P30154,P36179,Q09543,Q3ZCD7,Q76MZ3,Q29548,Q32PI5,Q54QR9,Q6P8U6,Q4QQT4,Q8CHN6,P07686,Q90744,Q5M7N9,Q38951,A5A6P2,Q38950	P81139,Q0V8R6,Q13510,Q7TNP2,A0FGR8,P20060,Q3TZZ7,P54318,P54613,P54612,O60762,Q9NZ01,P26779,Q17RR3,Q8IWB9,Q5R6L8,Q2KHZ8,Q8NBX0,Q53H12,Q38845,Q61469,Q5RED7,P79145,P30153,P30154,P36179,Q09543,Q3ZCD7,Q76MZ3,Q29548,Q32PI5,Q54QR9,Q6P8U6,Q4QQT4,Q8CHN6,P07686,Q90744,Q5M7N9,Q38951,A5A6P2,Q38950
GO:1903846	biological_process	positive regulation of cellular response to transforming growth factor beta stimulus	0.00186817	156	0.00267815	219	0.519606	0.00054	1	0.00169088	0.0024144	0.513889	0.000601	1	0.0197	LGIHEDSVNR,EMLQQNK,VDGYVDPSGGSR,APFDLFENR,QASAQQPALGYAPQPGAPPAVVPSVSSSLYPSLV,VDQMAQAQAR,FYEQFGK,DNSTLGYMAAK,DQVSHSAFVEQVK,SLTNDWEEHLAVK,AASSSNVLPVQLDSQGR,EGLELPEDEEEK,GFEVLYMTEPIDEYAVQQLK,YHSSASGDEMT,ASTAIDSPAASNAVGSGK,AVVPQTSGMVAPVTGDN,NTDEITAEEYGEFYK,IEADKNDK,AVVPQTSGMVAPVTGDNNFGVR,GVVDSEDLPLNISR,GVVDSEDLPLNIS,ALLFLPR	DIYYITGENK,LGIHEDSVNR,HLEVNPDHSIVET,VDGYVDPSGGSR,APFDLFENR,EMLQQNK,QASAQQPALGYAPQPGAPPAVVPSVSSSLYPSLV,VDQMAQAQAR,VFIMDNCEDIIPEYLNFIK,FYEQFGK,DNSTLGYMAAK,SLTNDWEEHLAVK,ASTAIDSPAASNAVGSGK,AVVPQTSGMVAPVTGDN,NTDEITAEEYGEFYK,HLEVNPDHSIVETLR,AVVPQTSGMVAPVTGDNNFGVR,RAPFDLFENR,YHSSASGDEMTSLK,SSGVQAPNNGQVSSSSQPHIPSR,HLEVNPDHSIVETL,YHSSASGDEMTSL,AASSSNVLPVQLDSQGR,GFEVLYMTEPIDEYAVQQLK,FGDQILQIDGETLAGY,IEADK…	lcl|c229550_g1_i3|m.14392,lcl|c231891_g1_i1|m.16759,lcl|c233478_g1_i2|m.18597,lcl|c214691_g1_i1|m.3614,lcl|c227548_g2_i4|m.12564,lcl|c201183_g1_i1|m.1185	lcl|c229550_g1_i3|m.14392,lcl|c233478_g1_i2|m.18597,lcl|c231891_g1_i1|m.16759,lcl|c214691_g1_i1|m.3614,lcl|c201183_g1_i1|m.1185,lcl|c227548_g2_i4|m.12564	O02705,Q5R710,P07901,A5A6K9,P07900,P30947,P30946,O00560,Q9GKQ9,P11501,Q7PT10,Q69QQ6,Q07078,O61998,O02192,P02828,Q5R7R9,Q90474,Q04619,Q9BLC5,Q1JQE0,Q9CSN1,P27323,Q76LV2,Q61W58,P34058,P11499,P04809,Q76LV1,O57521,Q9GKX8,Q9GKX7,Q9Z254,P82995,Q18688,P36181,Q13573,P08238,P46633,Q4R4P1,Q4R4T5	O02705,Q5R710,P07901,A5A6K9,P07900,P30947,P30946,Q9GKQ9,O00560,P11501,Q7PT10,Q69QQ6,Q07078,O61998,O02192,P02828,Q5R7R9,Q90474,Q04619,Q9BLC5,Q1JQE0,Q9CSN1,P27323,Q76LV2,Q61W58,P34058,P11499,P04809,Q76LV1,O57521,Q9GKX8,Q9GKX7,Q9Z254,P82995,Q18688,P36181,Q13573,P08238,P46633,Q4R4P1,Q4R4T5
GO:0006637	biological_process	acyl-CoA metabolic process	0.00456266	381	0.00553973	453	0.279941	0.00507	1	0.00411412	0.00498244	0.276269	0.00563	1	0.101	EVGDDPSDEKVK,GTLVQTLK,AINALGEK,NIGDTSTMADSSVIDTL,IISFTELEELGK,EAELLSCEEGK,QDCDEFALLSQK,ALGFPLERPK,VVSPYSSEDAR,FYTAPTAIR,AYAQGVPK,GITGLVTETSHLDANEGIEFR,FAEEIVPVSVK,AIADYNSVEDGEK,WTYQEYYESTR,ALSGSCGMALEGMETK,FIIADGSLLGK,ITTVAAYIYR,ELELDMDKTNTNGGAIALGHPVGTSGAR,ATSDEVGVK,AAAVFDEIEK,DGTITAANASGICDGAAA,TVVQLFEQAVR,VPVEENAVR,GYTIPQCQELLPK,IGASVTDEEK,EELNHNISGVEK,TYYMSAGQVPVPVVFR,GISATVLGQHAAEAAM,LLDSGLA…	GTLVQTLK,LYELFIGR,AINALGEK,SRDEVQSIR,NIGDTSTMADSSVIDTL,IISFTELEELGK,VSVNDFIIK,ADGGEEPLPEGIF,ALGFPLERPK,VVSPYSSEDAR,FYTAPTAIR,AYAQGVPK,GITGLVTETSHLDANEGIEFR,FAEEIVPVSVK,AIADYNSVEDGEK,FIIADGSLLGK,ITTVAAYIYR,ATSDEVGVK,SAIRDSDPVVVLENEVM,TVVQLFEQAVR,GYTIPQCQELLPK,IGASVTDEEK,EELNHNISGVEK,DGTITAANASGICDGAAAL,TYYMSAGQVPVPVVFR,GISATVLGQHAAEAAM,LLDSGLADADDIK,LPMGVTGENLAEK,IIVPEGTK,LLQEAGILIPK,IFQGPVIVASPK,…	lcl|c216377_g1_i3|m.4559,lcl|c240852_g1_i3|m.27810,lcl|c227206_g2_i4|m.12245,lcl|c227206_g2_i4|m.12246,lcl|c223053_g2_i3|m.8836,lcl|c227188_g1_i1|m.12223,lcl|c223053_g2_i4|m.8837,lcl|c227188_g1_i1|m.12222,lcl|c241824_g2_i8|m.28977,lcl|c211660_g1_i1|m.2486,lcl|c229658_g3_i1|m.14486,lcl|c238200_g3_i4|m.24238,lcl|c238296_g3_i2|m.24349,lcl|c227206_g2_i2|m.12244,lcl|c234135_g3_i1|m.19523,lcl|c241579_g…	lcl|c216377_g1_i3|m.4559,lcl|c240852_g1_i3|m.27810,lcl|c227206_g2_i4|m.12245,lcl|c227206_g2_i4|m.12246,lcl|c223053_g2_i3|m.8836,lcl|c227188_g1_i1|m.12223,lcl|c223053_g2_i4|m.8837,lcl|c227188_g1_i1|m.12222,lcl|c241824_g2_i8|m.28977,lcl|c211660_g1_i1|m.2486,lcl|c229658_g3_i1|m.14486,lcl|c238200_g3_i4|m.24238,lcl|c238296_g3_i2|m.24349,lcl|c227206_g2_i2|m.12244,lcl|c234135_g3_i1|m.19523,lcl|c241579_g…	P51660,P0C1Z2,Q924N5,P08559,Q8JZR0,Q9JID6,P18163,Q99PU5,Q9HAB8,Q32PF2,O75390,Q8BWT1,O60488,O88813,Q9UKU0,Q90512,Q16P20,Q8VHF5,P41216,Q4S5X1,P35486,Q9ULC5,Q6S9V5,Q6S9V6,Q6S9V7,Q4R4P9,Q6S9V8,P32020,Q6S9V9,Q2TCH3,Q9CZU6,Q9QXG4,Q7ZYC4,Q0QHL3,Q2KHW5,Q28DK1,Q5R833,Q96GR2,Q0GNE1,P52899,Q96I99,Q0GNE0,P22439,Q29RK1,Q96CM8,Q9NZ01,Q5ZKR7,P00889,Q7ZVY5,O31826,P07857,P97852,P33124,P33121,P51659,Q9D051,Q91WC3,…	P51660,P0C1Z2,Q924N5,P08559,Q8JZR0,Q9JID6,P18163,Q99PU5,O75390,Q8BWT1,O60488,O88813,Q9UKU0,Q90512,Q16P20,Q8VHF5,P41216,Q4S5X1,P35486,Q6S9V5,Q9ULC5,Q6S9V6,Q6S9V7,Q4R4P9,Q6S9V8,Q6S9V9,Q9CZU6,Q9QXG4,Q7ZYC4,Q0QHL3,Q2KHW5,Q28DK1,Q5R833,Q96GR2,Q0GNE1,P52899,Q96I99,Q0GNE0,P22439,Q29RK1,Q96CM8,Q9NZ01,Q5ZKR7,P00889,Q7ZVY5,O31826,P97852,P33124,P33121,P51659,Q9D051,Q91WC3,Q3ZCD7,Q9NPJ3,Q5R490,Q148D5,Q7ZWZ5,…
GO:0032924	biological_process	activin receptor signaling pathway	0	0	2.45e-05	2	null	0.153	1	1.08e-05	3.29e-05	1.61211	0.308	1	0.844		QDVPNMR		lcl|c224998_g2_i2|m.10292		Q04999,P17491
GO:0006638	biological_process	neutral lipid metabolic process	0.00294597	246	0.00262923	215	-0.164101	0.222	1	0.00266018	0.0023705	-0.16633	0.215	1	0.768	TATMTVGPK,GVDVWTVNPEDK,IIVMTTK,ASEIESLAR,ETTVVWDK,VGPPIISTEIK,IISFTELEELGK,VLLEQAPK,WNPFDLTK,LVDEPPPPLAPR,FFDIPMSVLPTVR,EFELTSDTNPIPR,AVGITNQR,QSPDTMTTGFGAPIDTK,EAETMILDK,TSASEQLSEYAK,LGTNYIQLPVNCPYK,INAAAIEDR,AGQLAGSDPDYNNR,EGERPENK,GVIIGLTQFTNK,YPLNSTDPTTER,GPILLQDAQF,FIIADGSLLGK,TSPGGPYAWLTYNEVLER,AASQGNTAAR,ASEQLSEFAQSR,DFGPLVGAIDQGTSSSR,SGTVVQLR,DGEVTHIK,ATSDEVGVK,ATLEATCFQTR,IWPHSEYPLIPVGK,…	VLHLSDFYPPK,TATMTVGPK,GVDVWTVNPEDK,IIVMTTK,ASEIESLAR,VGPPIISTEIK,IISFTELEELGK,VLLEQAPK,NGQIIEMK,TSTMTVGPK,WNPFDLTK,LVDEPPPPLAPR,FFDIPMSVLPTVR,EFELTSDTNPIPR,AVGITNQR,QSPDTMTTGFGAPIDTK,FSAEELESWNLLTR,EAETMILDK,TSASEQLSEYAK,LGTNYIQLPVNCPYK,INAAAIEDR,AGQLAGSDPDYNNR,EGERPENK,GVIIGLTQFTNK,YPLNSTDPTTER,TPFNATR,GPILLQDAQF,FIIADGSLLGK,TSPGGPYAWLTYNEVLER,ETTVVWDKLTGEPLHNAI,MGSQVTEEENTTAK,DFGPLVGAIDQGTSSSR,…	lcl|c239816_g8_i1|m.26351,lcl|c239816_g8_i5|m.26357,lcl|c239816_g8_i3|m.26354,lcl|c237550_g1_i2|m.23394,lcl|c237550_g1_i1|m.23390,lcl|c238296_g3_i11|m.24348,lcl|c229561_g1_i2|m.14409,lcl|c216784_g1_i4|m.4763,lcl|c226184_g5_i3|m.11275,lcl|c216784_g1_i1|m.4762,lcl|c240852_g1_i3|m.27810,lcl|c229658_g3_i2|m.14487,lcl|c225136_g5_i1|m.10393,lcl|c239835_g2_i1|m.26401,lcl|c225136_g5_i6|m.10396,lcl|c23289…	lcl|c225677_g1_i1|m.10817,lcl|c237550_g1_i2|m.23394,lcl|c237550_g1_i1|m.23390,lcl|c229561_g1_i2|m.14409,lcl|c216784_g1_i4|m.4763,lcl|c216784_g1_i1|m.4762,lcl|c240852_g1_i3|m.27810,lcl|c225136_g5_i6|m.10396,lcl|c229658_g3_i1|m.14486,lcl|c238200_g3_i4|m.24238,lcl|c238296_g3_i2|m.24349,lcl|c213883_g1_i1|m.3267,lcl|c225136_g5_i9|m.10397,lcl|c239816_g8_i1|m.26351,lcl|c239816_g8_i5|m.26357,lcl|c239816_…	Q9PWF7,Q64405,P13706,Q8JZR0,Q9JID6,P18163,P35235,Q14409,P32189,Q06124,O97492,Q27487,Q2I6W4,P41499,P90682,O61235,O57656,O88813,Q63060,O60488,P04040,Q9UKU0,Q14410,P41216,Q5RF10,P04762,Q9WU65,Q64516,Q9PT92,P24270,P33124,P33121,Q0IID9,O62839,Q91WC3,Q4R4D5,P17336,Q9UBV2,Q9ULC5,P9WKB9,P9WKB8,P00432,Q90687	Q9PWF7,Q64405,P13706,Q8JZR0,Q9JID6,P18163,P35235,Q14409,P32189,Q06124,O97492,Q27487,Q2I6W4,P41499,P90682,O61235,Q99685,O60488,O57656,O88813,Q63060,P0A651,P04040,Q9UKU0,Q14410,P9WKC9,P41216,Q5RF10,P04762,Q70VZ7,Q9WU65,Q64516,Q61469,Q9PT92,P24270,P33124,P33121,Q0IID9,O62839,Q91WC3,Q4R4D5,P17336,Q5ZLL8,Q9ULC5,P9WKB9,P9WKB8,P00432,Q90687
GO:0032925	biological_process	regulation of activin receptor signaling pathway	0.000766	64	0.000709	58	-0.111798	0.669	1	0.0007	0.000647	-0.112575	0.664	1	0.922	GVGGVIPPNATL,LTCSPDYAYGSR,EGYGEFPKPGETV,LGTGQVIR,GWDEGVNQMK,GVGGVIPPNATLLF,GVGGVIPPNATLL,AKLTCSPDYA,EGYGEFPKPGETVV,GVGGVIPPNATLLFD,EGYGEFPKPGETVVV	GVGGVIPPNATL,GVGGVIPPNAT,EGYGEFPKPGETVVVH,LTCSPDYAYGSR,AKLTCSPDY,EIIKEGYGEFPKPGETVVV,EGYGEFPKPGETV,LGTGQVIR,GWDEGVNQMK,GVGGVIPPNATLL,EGYGEFPKPGETVVV	lcl|c222929_g2_i3|m.8717	lcl|c222929_g2_i3|m.8717	O42123	O42123
GO:0006635	biological_process	fatty acid beta-oxidation	0.00616737	515	0.00601666	492	-0.0356934	0.694	1	0.00555729	0.00541045	-0.0386337	0.67	1	0.922	SSLCNVPAPR,IAMGAFDK,FLTVADQLLAGR,DIDIAMK,SAAAWQEGK,EFVYISQDPKDQLLLGPAYATPK,LEISREEQDEY,GFEIAQGR,EFIVNTPNPLAQK,TALAMGIDR,QDCDEFALLSQK,TIVAINKDPEAPIFQVADY,VETVDDLVAK,QNVGFIQLNRPK,FNSEVIPVTIPQR,LVTTAANR,WTAWNDLGDLSK,YNISVDEER,ISAAYLDPSK,FAEEIVPVSVK,AIADYNSVEDGEK,GIASEIVAVSCGPAK,AFAAGADIK,TQTVTADNGIR,ELELDMDKTNTNGGAIALGHPVGTSGAR,VVEELSK,DGTITAANASGICDGAAA,IVDQQFLLK,LLVPYLLEAIK,LNLNSLVDSNK,TAIPDTDLLIE…	AGLKLEDIDVF,FAFDQPLSSFQSIQIK,SSLCNVPAPR,FLTVADQLLAGR,DIDIAMK,ALAMGFKPK,SAAAWQEGK,LEISREEQDEY,EFIVNTPNPLAQK,TALAMGIDR,LLPGLATAYAFR,VETVDDLVAK,TTATLDGDHWVLNGTK,QNVGFIQLNRPK,FNSEVIPVTIPQR,LVTTAANR,WTAWNDLGDLSK,MGLNGVDNAK,YNISVDEER,FAEEIVPVSVK,AIADYNSVEDGEK,QAIDDDCNQTGQMLSALLK,EAVNTGYESSLSEGLH,AFAAGADIK,TQTVTADNGIR,VVEELSK,IVDQQFLLK,LLVPYLLEAIK,QLGSLGLLGITAPEK,TAIPDTDLLIEAIVENMR,DGTITAANASGICDGAAAL,D…	lcl|c244407_g1_i3|m.32143,lcl|c229093_g1_i2|m.13957,lcl|c243349_g1_i4|m.30872,lcl|c221672_g4_i6|m.7784,lcl|c222459_g5_i5|m.8381,lcl|c236416_g2_i2|m.22088,lcl|c240846_g1_i2|m.27805,lcl|c221672_g4_i1|m.7781,lcl|c222339_g3_i2|m.8253,lcl|c243683_g2_i1|m.31230,lcl|c222459_g5_i11|m.8380,lcl|c235937_g3_i1|m.21493,lcl|c222339_g3_i6|m.8255,lcl|c231559_g1_i1|m.16406,lcl|c231559_g1_i1|m.16405,lcl|c222419_g1…	lcl|c244407_g1_i3|m.32143,lcl|c229093_g1_i2|m.13957,lcl|c243349_g1_i4|m.30872,lcl|c221672_g4_i6|m.7784,lcl|c222459_g5_i5|m.8381,lcl|c236416_g2_i2|m.22088,lcl|c221672_g4_i1|m.7781,lcl|c222339_g3_i2|m.8253,lcl|c222459_g5_i11|m.8380,lcl|c220360_g1_i5|m.6901,lcl|c235937_g3_i1|m.21493,lcl|c222339_g3_i6|m.8255,lcl|c231559_g1_i1|m.16406,lcl|c231559_g1_i1|m.16405,lcl|c222419_g1_i2|m.8314,lcl|c222419_g1_i…	P51660,Q60587,P28288,Q9Z1N0,B3DMA2,Q8BH95,Q99JY0,O46629,O75521,Q5XIC0,Q9VSA3,Q8BWT1,Q8K370,P55096,Q5RC31,P23965,Q8HXX4,Q6AZA0,P45953,Q16836,P34559,P97852,Q9LMI7,P14604,Q5R1W7,P51659,P38117,P50544,Q29554,P16970,Q9WVK7,Q6JQN1,P55084	P51660,Q60587,Q9Z1N0,Q8BH95,Q99JY0,O46629,O75521,Q5XIC0,P15651,Q9VSA3,Q8BWT1,Q8K370,Q5RC31,P23965,Q8HXX4,Q6AZA0,P45953,Q16836,P34559,P97852,Q9LMI7,P14604,Q5R1W7,P51659,Q5RBD5,Q9JHI5,P38117,P50544,Q29554,O35459,Q9WVK7,Q6JQN1,P55084
GO:0032922	biological_process	circadian regulation of gene expression	0.000862	72	0.000917	75	0.0891144	0.708	1	0.000786	0.000834	0.0852527	0.718	1	0.933	LTSSHDGER,ELTYMHSEGILAGELK,AHQVVEDGYEF,INRDDASDESYFR,LTEGDDNVNAK,EIFLNQPILLELEAPLK,TFTDCFNCLPIAAIVDEK,FPGEIVATR,GSPLLIGIK,MVANGVENYEDTK,VLQLDEK,GALIVGVTNTVGSSISR,DDASDESYFR,QLLEELTQLPVVV,GSTSPVEEK,ELVEMTIK,SFDQSMTNLQNK,YGEYFPGTGDLR,EIFEQPESVVNTMR,VPQSNESAAEPEKDIETK,INRDDASDESY,IYGFYDECK,SVQLAESEVR,EVQTLQMELQQIMK,EQDPGADR,MESDDGDDDVPLAVR,GYDSAGVAYDGHGK,AMPVIMLVTR	AHQVVEDGYEF,INRDDASDESYFR,LTEGDDNVNAK,EIFLNQPILLELEAPLK,SSILSNDMSSLK,FPGEIVATR,GSPLLIGIK,MVANGVENYEDTK,VLQLDEK,TVTAELLR,DDASDESYFR,QLLEELTQLPVVV,ELVEMTIK,YGEYFPGTGDLR,EIFEQPESVVNTMR,VPQSNESAAEPEKDIETK,HDLDLICR,EIFEQPESVVNTM,INRDDASDESY,SVQLAESEVR,EVQTLQMELQQIMK,TIRPDNMSEYTK,EQDPGADR,MESDDGDDDVPLAVR,LPIVYSSGDSK,AMPVIMLVTR	lcl|c228121_g2_i2|m.13058,lcl|c218214_g1_i1|m.5632,lcl|c221883_g2_i5|m.7954,lcl|c233088_g8_i2|m.18125,lcl|c233088_g8_i4|m.18128,lcl|c215715_g5_i1|m.4161,lcl|c218214_g1_i1|m.5633,lcl|c221883_g2_i12|m.7953,lcl|c218214_g1_i2|m.5634	lcl|c228121_g2_i2|m.13058,lcl|c218214_g1_i1|m.5632,lcl|c221883_g2_i5|m.7954,lcl|c233088_g8_i2|m.18125,lcl|c233088_g8_i4|m.18128,lcl|c215715_g5_i1|m.4161,lcl|c242539_g3_i10|m.29919,lcl|c218214_g1_i1|m.5633,lcl|c221883_g2_i12|m.7953,lcl|c218214_g1_i2|m.5634	Q969P6,Q07050,P82808,Q3SWW9,Q6GQL2,P70288,O42227,Q7YR26,P56519,P53704,P56518,P56517,Q5I085,P30189,Q4KMC4,Q9WUL0,P11387,Q32PJ8,O09106,Q5ZLL1,Q8MJ47,Q6IM78,Q8R4U6,Q4QQW4,Q94517,Q8SRI2,O94808,P47856,P41512,Q92769,Q13547,Q04750,P14742,Q06210,Q5R740,Q09740,P62143,P61292,Q5RAG0,P62140,P62141,P62142,P62207,Q9Z2Z9,A9Q1D5,Q91695,Q08DQ2,O17966	Q969P6,P82808,Q3SWW9,Q6GQL2,O42227,P56519,P56518,P56517,Q5I085,Q4KMC4,Q32PJ8,Q8MJ47,Q94517,Q92769,Q04750,Q06210,Q5R740,P62207,Q9Z2Z9,A9Q1D5,Q07050,P70288,Q7YR26,P53704,P30189,Q9WUL0,P11387,O09106,Q5ZLL1,Q6IM78,Q8R4U6,Q4QQW4,Q8SRI2,O94808,P47856,P41512,P35869,Q13547,P14742,Q09740,P62143,P61292,Q5RAG0,P62140,P62141,P62142,Q91695,Q08DQ2,O17966
GO:0006636	biological_process	unsaturated fatty acid biosynthetic process	0.000707	59	0.000868	71	0.297325	0.241	1	0.000646	0.00079	0.290184	0.249	1	0.809	ISEWIER,LTALYEK,LDSEEWQK,LLVNLYNR,NYLSPIALFASVK,TLHEVTLPAYLEK,NEGQGFFFGEK,RLDSEEWQK,KEDSEAEGGAAQVAS,LYYFNSR,IATWEVTDFR,QDSPGDHVSNEK,DLVDIVAR	GDGMLNGGMLIVSK,TDDSLEDAIKK,ISEWIER,LAFAAANIEYEDK,YGTADEGGSK,LDSEEWQK,GLDDKELLPYFPY,SGRPPFGTMPFIETPEGY,LLVNLYNR,ILEVLGITAETK,NYLSPIALFASVK,DVTIPNSVGTPALIDEGNYMDQLFAFGSK,TLHEVTLPAYLEK,NEGQGFFFGEK,ISEIETGV,RLDSEEWQK,KEDSEAEGGAAQVAS,LYYFNSR,QDSPGDHVSNEK,DLVDIVAR	lcl|c223597_g3_i2|m.9232,lcl|c227289_g1_i2|m.12315,lcl|c229056_g1_i4|m.13924,lcl|c240333_g1_i3|m.27087,lcl|c240333_g1_i1|m.27086,lcl|c229056_g1_i1|m.13923,lcl|c221238_g1_i4|m.7502	lcl|c223597_g3_i2|m.9232,lcl|c227289_g1_i2|m.12315,lcl|c237425_g1_i1|m.23257,lcl|c237425_g1_i5|m.23259,lcl|c229056_g1_i4|m.13924,lcl|c240333_g1_i3|m.27087,lcl|c240333_g1_i1|m.27086,lcl|c229056_g1_i1|m.13923,lcl|c223444_g11_i2|m.9127,lcl|c221238_g1_i4|m.7502	O73888,P09917,Q6AZG8	O73888,Q9N0A4,P09917,Q4DJ07,Q6AZG8
GO:1903839	biological_process	positive regulation of mRNA 3'-UTR binding	1.2e-05	1	8.56e-05	7	2.83758	0.0315	1	2.15e-05	8.78e-05	2.02715	0.0539	1	0.4	IADFGLAR	IADFGLAR	lcl|c226782_g6_i6|m.11785,lcl|c235052_g1_i3|m.20523,lcl|c221061_g4_i1|m.7355,lcl|c235052_g1_i4|m.20524,lcl|c226176_g1_i2|m.11271,lcl|c221061_g4_i2|m.7358,lcl|c235052_g1_i6|m.20525,lcl|c232719_g2_i1|m.17712,lcl|c226782_g6_i4|m.11783,lcl|c213237_g2_i2|m.2995,lcl|c226782_g6_i5|m.11784,lcl|c221431_g3_i2|m.7619,lcl|c233141_g1_i1|m.18196,lcl|c213203_g1_i1|m.2991,lcl|c234378_g4_i3|m.19775,lcl|c224073_g3…	lcl|c226782_g6_i6|m.11785,lcl|c235052_g1_i3|m.20523,lcl|c221061_g4_i1|m.7355,lcl|c235052_g1_i4|m.20524,lcl|c226176_g1_i2|m.11271,lcl|c221061_g4_i2|m.7358,lcl|c235052_g1_i6|m.20525,lcl|c232719_g2_i1|m.17712,lcl|c226782_g6_i4|m.11783,lcl|c213237_g2_i2|m.2995,lcl|c226782_g6_i5|m.11784,lcl|c221431_g3_i2|m.7619,lcl|c233141_g1_i1|m.18196,lcl|c213203_g1_i1|m.2991,lcl|c234378_g4_i3|m.19775,lcl|c224073_g3…	Q61851,Q7T6X2,O64771,A8WIP6,P18460,Q3UMM4,Q00535,Q5ZKN1,P22607,Q00534,P43450,Q8N165,Q6NU47,Q6FN53,O22042,P08630,P27636,Q6P3Q4,P20794	Q61851,Q7T6X2,O64771,A8WIP6,P18460,Q3UMM4,Q00535,Q5ZKN1,P22607,Q00534,P43450,Q8N165,Q6NU47,Q6FN53,O22042,P08630,P27636,Q6P3Q4,P20794
GO:0006639	biological_process	acylglycerol metabolic process	0.00294597	246	0.00262923	215	-0.164101	0.222	1	0.00266018	0.0023705	-0.16633	0.215	1	0.768	TATMTVGPK,GVDVWTVNPEDK,IIVMTTK,ASEIESLAR,ETTVVWDK,VGPPIISTEIK,IISFTELEELGK,VLLEQAPK,WNPFDLTK,LVDEPPPPLAPR,FFDIPMSVLPTVR,EFELTSDTNPIPR,AVGITNQR,QSPDTMTTGFGAPIDTK,EAETMILDK,TSASEQLSEYAK,LGTNYIQLPVNCPYK,INAAAIEDR,AGQLAGSDPDYNNR,EGERPENK,GVIIGLTQFTNK,YPLNSTDPTTER,GPILLQDAQF,FIIADGSLLGK,TSPGGPYAWLTYNEVLER,AASQGNTAAR,ASEQLSEFAQSR,DFGPLVGAIDQGTSSSR,SGTVVQLR,DGEVTHIK,ATSDEVGVK,ATLEATCFQTR,IWPHSEYPLIPVGK,…	VLHLSDFYPPK,TATMTVGPK,GVDVWTVNPEDK,IIVMTTK,ASEIESLAR,VGPPIISTEIK,IISFTELEELGK,VLLEQAPK,NGQIIEMK,TSTMTVGPK,WNPFDLTK,LVDEPPPPLAPR,FFDIPMSVLPTVR,EFELTSDTNPIPR,AVGITNQR,QSPDTMTTGFGAPIDTK,FSAEELESWNLLTR,EAETMILDK,TSASEQLSEYAK,LGTNYIQLPVNCPYK,INAAAIEDR,AGQLAGSDPDYNNR,EGERPENK,GVIIGLTQFTNK,YPLNSTDPTTER,TPFNATR,GPILLQDAQF,FIIADGSLLGK,TSPGGPYAWLTYNEVLER,ETTVVWDKLTGEPLHNAI,MGSQVTEEENTTAK,DFGPLVGAIDQGTSSSR,…	lcl|c239816_g8_i1|m.26351,lcl|c239816_g8_i5|m.26357,lcl|c239816_g8_i3|m.26354,lcl|c237550_g1_i2|m.23394,lcl|c237550_g1_i1|m.23390,lcl|c238296_g3_i11|m.24348,lcl|c229561_g1_i2|m.14409,lcl|c216784_g1_i4|m.4763,lcl|c226184_g5_i3|m.11275,lcl|c216784_g1_i1|m.4762,lcl|c240852_g1_i3|m.27810,lcl|c229658_g3_i2|m.14487,lcl|c225136_g5_i1|m.10393,lcl|c239835_g2_i1|m.26401,lcl|c225136_g5_i6|m.10396,lcl|c23289…	lcl|c225677_g1_i1|m.10817,lcl|c237550_g1_i2|m.23394,lcl|c237550_g1_i1|m.23390,lcl|c229561_g1_i2|m.14409,lcl|c216784_g1_i4|m.4763,lcl|c216784_g1_i1|m.4762,lcl|c240852_g1_i3|m.27810,lcl|c225136_g5_i6|m.10396,lcl|c229658_g3_i1|m.14486,lcl|c238200_g3_i4|m.24238,lcl|c238296_g3_i2|m.24349,lcl|c213883_g1_i1|m.3267,lcl|c225136_g5_i9|m.10397,lcl|c239816_g8_i1|m.26351,lcl|c239816_g8_i5|m.26357,lcl|c239816_…	Q9PWF7,Q64405,P13706,Q8JZR0,Q9JID6,P18163,P35235,Q14409,P32189,Q06124,O97492,Q27487,Q2I6W4,P41499,P90682,O61235,O57656,O88813,Q63060,O60488,P04040,Q9UKU0,Q14410,P41216,Q5RF10,P04762,Q9WU65,Q64516,Q9PT92,P24270,P33124,P33121,Q0IID9,O62839,Q91WC3,Q4R4D5,P17336,Q9UBV2,Q9ULC5,P9WKB9,P9WKB8,P00432,Q90687	Q9PWF7,Q64405,P13706,Q8JZR0,Q9JID6,P18163,P35235,Q14409,P32189,Q06124,O97492,Q27487,Q2I6W4,P41499,P90682,O61235,Q99685,O60488,O57656,O88813,Q63060,P0A651,P04040,Q9UKU0,Q14410,P9WKC9,P41216,Q5RF10,P04762,Q70VZ7,Q9WU65,Q64516,Q61469,Q9PT92,P24270,P33124,P33121,Q0IID9,O62839,Q91WC3,Q4R4D5,P17336,Q5ZLL8,Q9ULC5,P9WKB9,P9WKB8,P00432,Q90687
GO:2000157	biological_process	negative regulation of ubiquitin-specific protease activity	0.000958	80	0.00127181	104	0.408732	0.0558	1	0.000872	0.00115233	0.401545	0.0589	1	0.4	QGPFDAVILPGGLGGTQNLAQSAK,EILQEQEK,VKEILQEQEK,TVIGGLTGSDPVSCSR,QGPFDAVILPGGLGGTQNLAQ,SVVVKPDMSLEDAIK	QGPFDAVILPGGLGGTQNLAQSAK,EILQEQEK,VKEILQEQEK,TVIGGLTGSDPVSCS,TVIGGLTGSDPVSCSR,SVVVKPDMSLEDAIK	lcl|c226414_g3_i1|m.11460	lcl|c226414_g3_i1|m.11460	Q5E946	Q5E946
GO:0106016	biological_process	positive regulation of inflammatory response to wounding	0.000192	16	0.000208	17	0.117684	0.815	1	0.000183	0.000198	0.109612	0.822	1	0.962	VMCQESQTCCEVSAGK,SECPADSSCCK,ESQCQEDQTCCK,LASGEYGCCPLPHAVCCSDK,CDLSAQTCTT,LSSGSWGCCPLR	LSSGSWGCCPLRK,VMCQESQTCCEVSAGK,ESECPDSNTCCK,SECPADSSCCK,CDLSAQTCTT,LSSGSWGCCPLR,SIICPDRESECPDSNTCCK	lcl|c226332_g1_i2|m.11417	lcl|c226332_g1_i2|m.11417	P23785	P23785
GO:0106014	biological_process	regulation of inflammatory response to wounding	0.000192	16	0.000208	17	0.117684	0.815	1	0.000183	0.000198	0.109612	0.822	1	0.962	VMCQESQTCCEVSAGK,SECPADSSCCK,ESQCQEDQTCCK,LASGEYGCCPLPHAVCCSDK,CDLSAQTCTT,LSSGSWGCCPLR	LSSGSWGCCPLRK,VMCQESQTCCEVSAGK,ESECPDSNTCCK,SECPADSSCCK,CDLSAQTCTT,LSSGSWGCCPLR,SIICPDRESECPDSNTCCK	lcl|c226332_g1_i2|m.11417	lcl|c226332_g1_i2|m.11417	P23785	P23785
GO:2000158	biological_process	positive regulation of ubiquitin-specific protease activity	0.00155681	130	0.00157754	129	0.0190802	0.915	1	0.00141086	0.00142669	0.0160945	0.928	1	0.992	EMVELPLR,LAGESESNLR,LLVEEAINDDNSVVSMSQAK,GILLYGPPGTGK,FDREVDIGIPDATGR,LGDIVSVQACPDVK,MDLIDLEDEQIDAEVLDSLA,NSPAIIFIDEIDAIAPK,IHVLPIDDTVEGLTGNL,EVDIGIPDATGRLEILR,LLVEEAINDDNSVV,AFEEAEK,LGDDVDLEQIAAETHGY,LGDDVDLEQIAAETHG,KAFEEAEK,IVSQLLTLMDGLK,EVDIGIPDATGR,MEELQLFR	EMVELPLR,EVDIGIPDATGRLEI,LAGESESNLR,IHVLPIDDTVEGLTGN,LLVEEAINDDNSVVSMSQAK,GILLYGPPGTGK,FDREVDIGIPDATGR,IHVLPIDDTVEGLTGNLF,LGDIVSVQACPDVK,IHVLPIDDTVEGLTGNL,FDREVDIGIPDATG,EVDIGIPDATGRLEIL,LLVEEAINDDNSVV,AFEEAEK,LGDDVDLEQIAAETHGY,LGDDVDLEQIAAETHG,KAFEEAEK,IVSQLLTLMDGLK,EVDIGIPDATGR,MEELQLFR	lcl|c229538_g7_i4|m.14373,lcl|c235754_g3_i10|m.21302,lcl|c235754_g3_i1|m.21301,lcl|c234626_g4_i3|m.20042	lcl|c229538_g7_i4|m.14373,lcl|c235754_g3_i10|m.21302,lcl|c235754_g3_i1|m.21301,lcl|c234626_g4_i3|m.20042	Q9SCN8,Q9P3A7,P54774,Q5R658,P25694,Q9UN37,Q7KN62,Q7ZU99,Q793F9,P54812,P54811,Q8VEJ9,Q96372,A0JMA9,P23787,P46467,P55072,P03974,P46462,O75351,Q01853,Q0VD48,Q3ZBT1,P54609,Q9LZF6,Q6GL04,Q5AWS6	Q9SCN8,Q9P3A7,P54774,Q5R658,P25694,Q9UN37,Q7KN62,Q7ZU99,Q793F9,P54812,P54811,Q8VEJ9,Q96372,A0JMA9,P23787,P46467,P55072,P03974,P46462,O75351,Q01853,Q0VD48,Q3ZBT1,P54609,Q9LZF6,Q6GL04,Q5AWS6
GO:2000171	biological_process	negative regulation of dendrite development	0.000647	54	0.00055	45	-0.232814	0.423	1	0.000592	0.000505	-0.230648	0.423	1	0.892	ANYDQAQIAEK,FNVWDVGGQDK,GSTSPVEEK,VPVGDQPPDIEMLIR,TTSATIPFIR,TEEEVPGKPTEVK,YGEYFPGTGDLR,SQDILAPDFSR,AIEGGGDSIDTK,VPQSNESAAEPEKDIETK,TGTFMVVDSTLDR,TPETSLR,VFVLGDGK,VIDINDNAPTIIPR,LDLITADDVTDIEDDIGR,SSVLENFVGR,GISSLPINLR,GMEDLIPIMNK,ETSTLPDDVANYK,EIVAETDRETGSNK,SMAGEIGTLDPQMER,LSTNSSSVDNLK,MVANGVENYEDTK,LTNTQESASR	ANYDQAQIAEK,FNVWDVGGQDK,TIDIFNYVAYLR,VGLFTPDMAFEAIVK,YGEYFPGTGDLR,SQDILAPDFSR,AIEGGGDSIDTK,TQEISYTDTK,VPQSNESAAEPEKDIETK,GQVISGTQVR,RLSTNSSSVDNLK,VLAVPGEMINDADHPPIPVEQFAK,VLWNEPLNK,SSVLENFVGR,SSILSNDMSSLK,SQTVPDTQVSLTK,VVASDQGQNR,MVANGVENYEDTK,TIRPDNMSEYTK,GVTEDNGR,AYIATQGPLPETVDDFWR	lcl|c218214_g1_i1|m.5632,lcl|c237457_g1_i4|m.23291,lcl|c237457_g1_i3|m.23289,lcl|c239343_g4_i4|m.25612,lcl|c238872_g6_i2|m.25038,lcl|c241105_g3_i1|m.28176,lcl|c214189_g1_i1|m.3388,lcl|c241105_g3_i4|m.28181,lcl|c244055_g1_i3|m.31694,lcl|c243578_g4_i1|m.31087,lcl|c218214_g1_i1|m.5633,lcl|c218214_g1_i2|m.5634	lcl|c218214_g1_i1|m.5632,lcl|c217363_g1_i5|m.5151,lcl|c217363_g1_i4|m.5150,lcl|c227706_g1_i4|m.12692,lcl|c241105_g3_i4|m.28181,lcl|c218214_g1_i1|m.5633,lcl|c218214_g1_i2|m.5634,lcl|c227706_g1_i7|m.12694,lcl|c217363_g1_i1|m.5149,lcl|c244324_g2_i1|m.32048,lcl|c239343_g4_i4|m.25612,lcl|c238872_g6_i2|m.25038,lcl|c214189_g1_i1|m.3388,lcl|c241105_g3_i1|m.28176,lcl|c244055_g1_i3|m.31694	B0V2N1,Q8R508,A7MBJ4,Q8BNA6,P50570,F1NWE3,O42227,Q24292,P56519,P56518,P56517,E9PVD3,Q32PJ8,Q8BZ98,A2A8L5,P23468,Q9NYQ8,Q94517,P26990,Q92769,Q08877,Q96JQ0,P16621,P39054,P39053,P39055,Q5F226,P39052,Q13332,P21575,Q05193,A4IFW2,Q64604,Q8TDW7,Q64605,Q19319,P70288,Q9UQ16,B8V7Q1,Q64487,Q08DF4,P62330,P62331,O09106,P62332,Q007T5,A6H7I5,P58365,Q4QQW4,Q99PF4,O88277,Q14517,Q13547,Q9VW71,P10586,Q2PZL6,Q9H251,…	B0V2N1,Q8R508,A7MBJ4,Q8BNA6,P50570,F1NWE3,O42227,Q24292,P56519,P56518,P56517,E9PVD3,Q6V1P9,Q32PJ8,Q8BZ98,A2A8L5,P23468,Q9NYQ8,Q94517,P26990,Q91757,Q92769,Q08877,Q96JQ0,P16621,P39054,P39053,Q5F226,P39055,P39052,P49841,Q13332,P21575,Q05193,A4IFW2,Q64604,Q8TDW7,Q64605,P70288,Q9UQ16,B8V7Q1,P18266,Q64487,Q08DF4,P62330,P62331,O09106,P62332,Q007T5,A6H7I5,P58365,Q4QQW4,Q99PF4,O88277,Q14517,Q9WV60,Q13547,…
GO:0035194	biological_process	posttranscriptional gene silencing by RNA	0.000599	50	0.000526	43	-0.187371	0.532	1	0.000549	0.000483	-0.185844	0.531	1	0.892	EVDEVVLVGGSTR,ITITNDKGR,FTTEQEGIPGADIAK,AYNEDADGR,QIIEIENK,LSKDDIDR,TEAANVEK,QKELESICNPIITK,CNEVVSWLDTQPDASKELYER,GGLSTLNR,ELESICNPIITK,STVEDDKVK,GMTTSNNLLGK	LEDLDKPGVDDEPQQV,ELESICNPIITK,ITITNDKGR,ITITNDK,STVEDDKVK,TEAANVEK,VTMSSSVSLLSR,QPLWNHLLNYYK,QKELESICNPIITK	lcl|c214164_g1_i8|m.3381,lcl|c244496_g1_i3|m.32287,lcl|c226250_g1_i4|m.11333,lcl|c173350_g1_i1|m.532,lcl|c243045_g1_i1|m.30553,lcl|c244485_g3_i2|m.32271,lcl|c231881_g1_i2|m.16748,lcl|c214164_g1_i1|m.3380,lcl|c244510_g1_i1|m.32323,lcl|c244485_g3_i4|m.32273,lcl|c218413_g4_i5|m.5771,lcl|c218413_g4_i1|m.5770,lcl|c226546_g3_i1|m.11574	lcl|c231881_g1_i2|m.16748,lcl|c222669_g8_i2|m.8513,lcl|c243045_g1_i1|m.30553	Q6DIE2,O73885,O76512,Q6GQD0,A2A4P0,Q09530,Q5NVM9,Q5R7D3,A1Z9L3,Q4R888,Q9EPU0,P17156,Q7PX35,Q9N1U2,Q7YQC6,Q5ZJZ6,P26413,B3MS75,P53131,Q54F05,Q28222,F4JMJ3,P16627,Q9U639,Q7YR39,Q01877,Q98TR3,A2Q0Z1,Q91233,Q29G82,B4M7T6,Q38953,P08418,Q17R09,P11147,P14659,P22954,Q24789,Q05944,P22953,P41753,F4IJV4,O43143,Q9LZQ9,P34933,B4JM29,Q3UYV9,Q54I89,Q56A27,P34498,Q20875,Q55E58,P34931,P34930,B4Q034,Q04967,O65719,…	P0DMV8,P54652,P0DMV9,O73885,O76512,P19378,Q557E0,Q5B2V1,Q5NVM9,Q5R7D3,Q4R888,Q9EPU0,P17156,Q9TUG3,Q9FJR0,Q9N1U2,Q7YQC6,P0CB32,Q90473,P26413,P29843,P27322,Q8R418,Q28222,P16627,P0DMW0,P0DMW1,Q9U639,Q27965,P11142,Q01877,Q98TR3,P17879,A2Q0Z1,P09189,Q91233,P63017,P63018,P08418,P11147,P14659,Q61696,Q9VYS3,P22954,Q27975,Q9HEH1,P02827,Q24789,Q05944,Q4U0F3,P47773,P22953,P08106,P09435,P41753,P34933,P08108,…
GO:0035195	biological_process	gene silencing by miRNA	4.79e-05	4	0	0	null	0.0478	1	5.38e-05	1.1e-05	-2.29478	0.107	1	0.557	FTTEQEGIPGADIAK,AYNEDADGR		lcl|c214164_g1_i8|m.3381,lcl|c214164_g1_i1|m.3380		B4JM29,Q16UN6,B4NC41,Q09161,B3NU52,B4I0W6,Q3UYV9,Q6DIE2,B3MS75,Q56A27,Q6GQD0,B4Q034,Q6GQ80,Q7PX35,Q7K4N3,B4L2J8,B4GW22,Q29G82,Q5ZJZ6,B4M7T6,C0H906
GO:0035196	biological_process	production of miRNAs involved in gene silencing by miRNA	0.00012	10	0.000196	16	0.708293	0.219	1	0.000118	0.000187	0.655181	0.236	1	0.801	LTITSAPDVSSPTLPTSPR,SKQEGVSQGK,SLPSSSASK	EMNEIVSSPENCSK,LTITSAPDVSSPTLPTSPR,SKQEGVSQGK,SLPSSSASK,VTMSSSVSLLSR	lcl|c239419_g1_i1|m.25763,lcl|c215838_g2_i1|m.4235,lcl|c239419_g1_i10|m.25764	lcl|c219496_g5_i3|m.6414,lcl|c219496_g5_i4|m.6416,lcl|c239419_g1_i1|m.25763,lcl|c219496_g5_i1|m.6410,lcl|c219496_g5_i6|m.6418,lcl|c219496_g5_i2|m.6413,lcl|c222669_g8_i2|m.8513,lcl|c215838_g2_i1|m.4235,lcl|c239419_g1_i10|m.25764	Q8R3G1,Q6DJB9,Q8CJG0,Q9QZ81,Q6DCX2	Q7ZYA5,Q8R3G1,Q8R418,Q6DJB9,Q2HJ92,Q8CJG0,Q9QZ81,Q6DCX2
GO:2000172	biological_process	regulation of branching morphogenesis of a nerve	0.000802	67	0.000966	79	0.267912	0.263	1	0.000732	0.000878	0.261615	0.271	1	0.825	KEDEVPSPTD,DVDIPKDK,VGMTVMGAIQK,ELTSWPAK,EETPAVEDLPTEK,EHGVDQR,KEDEVPSPTDENLPDEKEETPAVEDLPTEK,AVEIVEASVDR,TGTDNPFK,KDSDEKPEETASTK,DSDEKPEETASTK,TQICALVNQAK	VGMTVMGAIQK,ELTSWPAK,EETPAVEDLPTEK,EHGVDQR,IIDLIYWK,KEDEVPSPTDENLPDEKEETPAVEDLPTEK,AVEIVEASVDR,TGTDNPFK,KDSDEKPEETASTK,DSDEKPEETASTK	lcl|c213534_g3_i4|m.3118	lcl|c213534_g3_i4|m.3118	Q99P72	Q99P72
GO:1902523	biological_process	positive regulation of protein K63-linked ubiquitination	4.79e-05	4	7.34e-05	6	0.615183	0.506	1	5.38e-05	7.68e-05	0.512577	0.542	1	0.892	QNVSGVSK,TTNEGSGGNNSGVER	TTNEGSGGNNSGVER,APATATESK	lcl|c241650_g2_i3|m.28825	lcl|c241650_g2_i3|m.28825	Q9Y2R2	Q9Y2R2
GO:0006651	biological_process	diacylglycerol biosynthetic process	0	0	2.45e-05	2	null	0.153	1	1.08e-05	3.29e-05	1.61211	0.308	1	0.844		VLHLSDFYPPK,GVFQYTFGLLPYR		lcl|c216138_g1_i1|m.4413,lcl|c230872_g2_i3|m.15727,lcl|c230872_g2_i1|m.15726		Q61469,Q70VZ7
GO:0006650	biological_process	glycerophospholipid metabolic process	0.00401178	335	0.00396219	324	-0.0179465	0.873	1	0.0036187	0.00356673	-0.0208718	0.852	1	0.971	VAVDNSSTVLGAPEVMLGLLPGAGGTQR,SDLDAQR,EGNFDVVSGTR,IQQAEADLR,STNLDNKDFMGK,SVNVNNMADSMK,DMNELDADEGR,ASQAEFDR,EFVYISQDPKDQLLLGPAYATPK,NLASGSLKPDR,TEGISTSDLIAR,LQIWDTAGQER,HNIDPSK,TGENVEDAFLDTAK,KAAVNPSK,TWYDDQEK,LVTTAANR,QYTEEQLGTSEK,GAAGALMVYDITR,SATGTSVEK,MDLVWTK,SDPFLQISK,DQLLLGPAYATPK,ESADDSGNIER,NNLNPSWK,QEQDEYALR,LPSLVGLPDSLDMMLTGK,QLEGIYGTEVIR,CDVTDGVAIVR,TQTVTADNGIR,NFLEGDMK,IIEVSGQK,VGVPPMEK…	AGLKLEDIDVF,GPQELSDSMK,TLFANFLK,VAVDNSSTVLGAPEVMLGLLPGAGGTQR,SDLDAQR,EGNFDVVSGTR,IQQAEADLR,VTQPPDEDFR,SVNVNNMADSMK,DMNELDADEGR,ALAMGFKPK,ASQAEFDR,NLASGSLKPDR,LQIWDTAGQER,TGENVEDAFLDTAK,TIGTAALAIVK,TTQFGQIIENELQNFEK,LVTTAANR,QYTEEQLGTSEK,FSAEELESWNLLTR,SDPFLQISK,DQLLLGPAYATPK,HVLAEIPK,ESADDSGNIER,QEQDEYALR,LPSLVGLPDSLDMMLTGK,CDVTDGVAIVR,TQTVTADNGIR,IIEVSGQK,FDLNTVPRPSLTK,FESLVEK,SDEFQQFLDQNQYSSNSI…	lcl|c243671_g5_i1|m.31222,lcl|c236088_g1_i1|m.21668,lcl|c217024_g2_i5|m.4908,lcl|c236088_g1_i4|m.21670,lcl|c220736_g3_i1|m.7111,lcl|c236588_g1_i1|m.22288,lcl|c231210_g4_i4|m.16042,lcl|c222854_g1_i1|m.8663,lcl|c229067_g1_i3|m.13935,lcl|c215819_g3_i2|m.4218,lcl|c225136_g5_i6|m.10396,lcl|c243393_g3_i1|m.30930,lcl|c243357_g2_i4|m.30881,lcl|c225136_g5_i9|m.10397,lcl|c224624_g2_i1|m.10023,lcl|c219817_g…	lcl|c243671_g5_i1|m.31222,lcl|c231210_g4_i4|m.16042,lcl|c233521_g3_i3|m.18674,lcl|c222854_g1_i1|m.8663,lcl|c225136_g5_i6|m.10396,lcl|c223679_g2_i2|m.9306,lcl|c243393_g3_i1|m.30930,lcl|c223679_g2_i1|m.9304,lcl|c225918_g2_i6|m.11053,lcl|c219817_g1_i3|m.6593,lcl|c233555_g4_i1|m.18705,lcl|c224624_g4_i1|m.10025,lcl|c227910_g4_i2|m.12882,lcl|c238381_g2_i2|m.24448,lcl|c233377_g4_i3|m.18471,lcl|c217854_g…	Q5R8Z8,Q60587,P70182,P13706,Q99JY0,O46629,Q6NYB7,O60762,P61028,P61027,Q5ZIT5,P61026,Q8HXX4,Q8BLR2,P61106,Q96A23,Q9FR44,Q5R5U1,O75131,O02811,Q29554,P24409,Q5ZKU5,P91580,P55084,Q9HB21,Q9UBL6,Q8BYI6,Q5R8P5,Q9Y5K3,O57656,Q6P4A8,P25228,Q15286,P61006,Q9Y371,Q5R6L8,P61007,Q5ZIR1,Q5R921,P70550,Q5R1W7,Q5U316,P42356,Q9JK48,O08662,P62822,Q9NTJ5,Q8CHP8,Q91V41,E9Q3L2,Q4R5P1,P22128,Q17QU4,Q6PHN9,P62820,Q8BT60,…	Q5R8Z8,Q60587,Q14642,P70182,P13706,Q99JY0,O46629,Q6NYB7,O60762,Q08758,P61028,Q5ZIT5,P61027,P61026,Q8HXX4,Q8BLR2,P61106,Q96A23,Q5RED7,Q9FR44,Q5R5U1,O75131,Q8C5L6,Q29554,P24409,Q5ZKU5,P91580,P55084,Q9HB21,Q9UBL6,Q5R8P5,P59644,P04180,O57656,Q6P4A8,Q5F356,Q15286,P25228,P61006,Q9Y371,Q5R6L8,Q5ZIR1,P61007,Q53H12,Q5R921,P70550,P78356,Q5R1W7,Q5U316,Q5ZLL8,Q9JK48,P62822,Q9NTJ5,Q91V41,P22128,Q17QU4,Q4R5P1,…
GO:0061408	biological_process	positive regulation of transcription from RNA polymerase II promoter in response to heat stress	0.00012	10	0.000122	10	0.0302207	0.963	1	0.000118	0.000121	0.0271497	0.965	1	0.992	ADLIPSTTANVK,VIGAEQGGLR,VLNDVQDMK,KVTESTSK	ADLIPSTTANVK,VIGAEQGGLR,VLNDVQDMK,KVTESTSK	lcl|c229541_g1_i10|m.14379,lcl|c229541_g1_i8|m.14382,lcl|c229541_g1_i2|m.14380,lcl|c227726_g1_i1|m.12708	lcl|c229541_g1_i10|m.14379,lcl|c229541_g1_i8|m.14382,lcl|c229541_g1_i2|m.14380,lcl|c227726_g1_i1|m.12708	Q00613,P38529,P29227	Q00613,P38529,P29227
GO:1902527	biological_process	positive regulation of protein monoubiquitination	0.00018	15	0.00022	18	0.293255	0.56	1	0.000172	0.000209	0.275077	0.574	1	0.892	LSPNFCNLCVR,ELQTALTSFGYR,FYDILVK,SGTIDANELQTAFTSFGYR	SGAISTNELQQALSNGTWTPFNPETVR,ELQTALTSFGYR,FYDILVK,SGTIDANELQTAFTSFGYR	lcl|c229025_g3_i1|m.13888,lcl|c225267_g2_i1|m.10483	lcl|c229025_g3_i1|m.13888,lcl|c225267_g2_i1|m.10483	Q9UBV8,P12815	Q9UBV8,P12815
GO:0006656	biological_process	phosphatidylcholine biosynthetic process	3.59e-05	3	6.11e-05	5	0.767186	0.461	1	4.31e-05	6.58e-05	0.612112	0.508	1	0.892	TEGISTSDLIAR,SDEFQQFLDQNQYSSNSILR	GPQELSDSMK,TLFANFLK,TTQFGQIIENELQNFEK,TPVIIVPGTGGSQLQAK,SDEFQQFLDQNQYSSNSILR	lcl|c239465_g4_i3|m.25833,lcl|c239465_g4_i1|m.25830,lcl|c217854_g5_i6|m.5415	lcl|c233021_g5_i2|m.18047,lcl|c217854_g5_i6|m.5415,lcl|c217854_g5_i4|m.5414,lcl|c236583_g2_i5|m.22287,lcl|c217854_g5_i1|m.5413	Q9FR44,Q9Y5K3	P04180,Q08758,Q9FR44
GO:1903859	biological_process	regulation of dendrite extension	0.000671	56	0.000795	65	0.245234	0.35	1	0.000614	0.000724	0.238654	0.36	1	0.875	QTEALLQR,NFLEGDMK,MDLFEISEPNEDLEYR,GVSPVSNPELLK,IQQAEADLR,FGAQTATFFSR,QYTEEQLGTSEK,SVNVNNMADSMK,LGQVESWAQK,VTESEALGQSMIEAGNDFGPGTNYGSALVK,LLQFVTGTSR,ALTSFDLETR,FESLVEK,ASQAEFDR,DGSSISSDSDSQK,NNLLLDSYR	QTEALLQR,ASQAEFDRQYEVTK,MDLFEISEPNEDLEYR,ALLENYRPAPDELDIPR,GVSPVSNPELLK,IQQAEADLR,FGAQTATFFSR,QYTEEQLGTSEK,SVNVNNMADSMK,VTESEALGQSMIEAGNDFGPGTNYGSALVK,LLQFVTGTSR,SANPAPGGTR,FESLVEK,ASQAEFDR,EAVTGGDVTPR,NNLLLDSYR,DGPAAVDGR	lcl|c227910_g4_i2|m.12882,lcl|c227910_g4_i10|m.12878,lcl|c242839_g1_i1|m.30268,lcl|c233142_g2_i1|m.18198,lcl|c227910_g4_i13|m.12880,lcl|c233142_g2_i4|m.18201,lcl|c227910_g4_i7|m.12883,lcl|c227910_g4_i11|m.12879	lcl|c242839_g1_i1|m.30269,lcl|c227910_g4_i2|m.12882,lcl|c227910_g4_i10|m.12878,lcl|c242839_g1_i1|m.30268,lcl|c233142_g2_i1|m.18198,lcl|c169738_g3_i3|m.504,lcl|c169738_g3_i1|m.502,lcl|c227910_g4_i13|m.12880,lcl|c233142_g2_i4|m.18201,lcl|c227910_g4_i7|m.12883,lcl|c227910_g4_i11|m.12879,lcl|c169738_g3_i2|m.503	Q62940,Q5R8P5,Q5RBF2,Q9QZQ1,P46935,P46934,Q9JK48,Q9VVI3,Q96PU5,P55196,Q9Y371,Q8CFI0,O35889,Q5ZIR1	Q62940,Q5R8P5,Q5RBF2,Q9QZQ1,P46935,P46934,Q9JK48,Q9VVI3,Q96PU5,P55196,Q9Y371,O17798,Q8CFI0,O35889,Q5ZIR1
GO:0061402	biological_process	positive regulation of transcription from RNA polymerase II promoter in response to acidic pH	0.00607157	507	0.00577208	472	-0.0729782	0.428	1	0.00547113	0.00519096	-0.0758386	0.409	1	0.892	TGEDGDFLWPGFGENCR,LGQWMSVTEMNENLATR,IGIQVTDSPYVV,EYYDEQLGDDLPQAVLDE,VLGDGDFVK,DPFAMRPFFGYNFGR,EYYDEQLGDDLPQAVLDELNALEER,GNFDSLPVK,TDPHDVAR,TMYMIPFSMGPVGSPVSK,YITGAFPSACGK,VQDYVADKVK,TNLAMITPTLPGWK,AINPESGFFGVAPGTSK,SFGSGYGGNSLLGK,VQDYVADK,LREYYDEQLGDDLPQAV,AINPESGFFGVAPGSSY,TYICTENK,MGDNVMEVLDDGDFVK,VLEWILK,LREYYDEQLGDDLPQAVLDE,IASTIGRDEGWLA,QYYDEQLGEDLPQEVSDELNALESR,LVICDGSQEENEGLLK,LLMELGIASPLK…	TGEDGDFLWPGFGENCR,LGQWMSVTEMNENLATR,VLGDGDFVK,DPFAMRPFFGYNFGR,EYYDEQLGDDLPQAVLDELNALEER,GNFDSLPVK,TDPHDVAR,TMYMIPFSMGPVGSPVSK,YITGAFPSACGK,VQDYVADKVK,TNLAMITPTLPGWK,AINPESGFFGVAPGTSK,SFGSGYGGNSLLGK,VQDYVADK,LREYYDEQLGDDLPQAV,AINPESGFFGVAPGSS,AINPESGFFGVAPGSSY,TVMRDPF,MGDNVMEVLDDGDFVK,VLEWILK,LLMELGIASPLKK,SFGSGYGGNSLLGKK,IFHVNWFR,QYYDEQLGEDLPQEVSDELNALESR,LVICDGSQEENEGLLK,LLMELGIASPLK,LCEPDKLVICD…	lcl|c224672_g2_i1|m.10058,lcl|c224672_g1_i1|m.10055	lcl|c224672_g2_i1|m.10058,lcl|c224672_g1_i1|m.10055	Q9Z755,Q869Z4,Q5L4X1,Q16822,Q5R5J1,Q821M4,Q05893,Q256B8,P35558,C0ZRP8,P29190,Q9PLL6,P20007,P05153,Q9Z2V4,Q8BH04,Q8HYZ4,P21642,A3DJE3,P07379	Q9Z755,Q869Z4,Q5L4X1,Q16822,Q5R5J1,Q821M4,Q05893,Q256B8,P35558,C0ZRP8,P29190,Q9PLL6,P20007,P05153,Q9Z2V4,Q8BH04,Q8HYZ4,P21642,A3DJE3,P07379
GO:1902525	biological_process	regulation of protein monoubiquitination	0.00018	15	0.00022	18	0.293255	0.56	1	0.000172	0.000209	0.275077	0.574	1	0.892	LSPNFCNLCVR,ELQTALTSFGYR,FYDILVK,SGTIDANELQTAFTSFGYR	SGAISTNELQQALSNGTWTPFNPETVR,ELQTALTSFGYR,FYDILVK,SGTIDANELQTAFTSFGYR	lcl|c229025_g3_i1|m.13888,lcl|c225267_g2_i1|m.10483	lcl|c229025_g3_i1|m.13888,lcl|c225267_g2_i1|m.10483	Q9UBV8,P12815	Q9UBV8,P12815
GO:0006654	biological_process	phosphatidic acid biosynthetic process	0.000623	52	0.000697	57	0.162671	0.556	1	0.000571	0.000637	0.15721	0.566	1	0.892	QTEALLQR,NFLEGDMK,IQQAEADLR,FGAQTATFFSR,QYTEEQLGTSEK,SVNVNNMADSMK,QLASPPGDAGLSVAPPSAPPSSDTSSR,VTESEALGQSMIEAGNDFGPGTNYGSALVK,FDLNTVPRPSLTK,FESLVEK,FDLNTVPRPSLT,ASQAEFDR	QTEALLQR,ASQAEFDRQYEVTK,IQQAEADLR,FGAQTATFFSR,QYTEEQLGTSEK,SVNVNNMADSMK,QLASPPGDAGLSVAPPSAPPSSDTSSR,VTESEALGQSMIEAGNDFGPGTNYGSALVK,FDLNTVPRPSLTK,FESLVEK,ASQAEFDR	lcl|c227910_g4_i2|m.12882,lcl|c227910_g4_i10|m.12878,lcl|c227910_g4_i13|m.12880,lcl|c227910_g4_i7|m.12883,lcl|c227910_g4_i11|m.12879	lcl|c227910_g4_i2|m.12882,lcl|c227910_g4_i10|m.12878,lcl|c227910_g4_i13|m.12880,lcl|c227910_g4_i7|m.12883,lcl|c227910_g4_i11|m.12879	Q9JK48,Q5R8P5,Q9Y371,Q5ZIR1	Q9JK48,Q5R8P5,Q9Y371,Q5ZIR1
GO:0106020	biological_process	regulation of vesicle docking	0.000192	16	0.000245	20	0.352149	0.466	1	0.000183	0.00023	0.332004	0.48	1	0.892	LTAFEPEAR,LITSITTGDFETYCK,AGAYDYPSPEWDTVTDEAK,IGSSGAPVTDQSEETR,EQQIIQLTQK	LTQRIGSSGAPVTDQSEETR,LTAFEPEAR,DIKPENL,DIKPENLL,IGSSGAPVTDQSEETR,EQQIIQLTQK	lcl|c228653_g2_i7|m.13499,lcl|c217326_g3_i1|m.5105,lcl|c228653_g2_i5|m.13498	lcl|c234064_g1_i4|m.19396,lcl|c210586_g1_i2|m.2213,lcl|c234064_g1_i2|m.19394,lcl|c210586_g1_i1|m.2212,lcl|c239574_g1_i2|m.26000,lcl|c210586_g1_i4|m.2214,lcl|c242662_g1_i1|m.30100,lcl|c229547_g1_i1|m.14385,lcl|c221676_g4_i8|m.7788,lcl|c226454_g2_i17|m.11487,lcl|c234064_g1_i1|m.19391,lcl|c241464_g1_i3|m.28607,lcl|c241464_g1_i1|m.28602,lcl|c239574_g1_i8|m.26002,lcl|c225854_g1_i4|m.10994,lcl|c221676_…	Q6DEH3,A8WXF6,Q6PHZ2,P28652,Q13557,Q3MHJ9,P11730,P11798,P11275,Q9UQM7,Q2HJF7,Q5RCC4,Q00168,Q5ZKI0,Q95266,P15791,Q9DG02,P08413,Q923T9,O77708	P11801,Q6GPN6,Q15418,Q96BR1,Q13557,O75582,Q63531,Q09137,Q5RCC4,Q6DE87,Q21734,Q9DB30,A5GFW1,P49138,Q923T9,Q15349,P28652,Q3MHJ9,D2I3C6,P11730,Q9JLM8,P18652,Q6PFQ0,Q9UQM7,P18653,Q2HJF7,P18654,P13234,Q5ZKI0,Q9DG02,Q5R7A7,Q5MPA9,O61661,Q16566,P08413,P0C605,A8WXF6,Q9WUT3,Q8IW41,Q6PHZ2,Q13976,Q8BRK8,A8X6H4,Q91ZN7,Q66JF3,Q95266,P15791,Q28948,Q7TPS0,O77708,Q6DEH3,Q0V7M1,Q91819,P51812,P10665,P11798,P10666,…
GO:0032915	biological_process	positive regulation of transforming growth factor beta2 production	0	0	1.22e-05	1	null	0.312	1	1.08e-05	2.19e-05	1.02715	0.553	1	0.892		ANSASSAMPIPSIPTPAIVTSPNASSPPSFI		lcl|c243672_g3_i1|m.31224		O93602,P15336
GO:0098705	biological_process	copper ion import across plasma membrane	8.38e-05	7	7.34e-05	6	-0.192172	0.811	1	8.62e-05	7.68e-05	-0.165495	0.824	1	0.962	TYGTGPGQTVITESR	TYGTGPGQTVITESR	lcl|c232301_g1_i1|m.17238,lcl|c232301_g1_i2|m.17239	lcl|c232301_g1_i1|m.17238,lcl|c232301_g1_i2|m.17239	O15431,Q8WNR0	O15431,Q8WNR0
GO:0050768	biological_process	negative regulation of neurogenesis	0.0133407	1114	0.0128527	1051	-0.0537658	0.383	1	0.0120085	0.0115452	-0.0567593	0.357	1	0.872	LTGLTEADLQAR,IFNIYPR,VPVGDQPPDIEMLIR,SQDILAPDFSR,SSLMVGSYGPKPESFV,NFQVGFPEKPVLR,TPETSLR,QIDNPNYKGEWIHPEIDNPEYQPDDALY,NCADVYNSGEK,LDLITADDVTDIEDDIGR,KYESVNAVTK,LYSESLAR,VYWSDVDAK,DTVEYDLVVQR,MSVVIEGR,GINLSGGQK,GMEDLIPIMNK,AQIFIFPGK,ETSTLPDDVANYK,EIVAETDRETGSNK,VFGVALLDNSR,GVADVTICQGK,ITWPGAR,LLEVEIEPGMHDGQEYPF,TTQSVIVTGR,VEREPYNGPVIQLPTSQLPQIVSPSQR,ERETGIPPEQSMETAK,NFLVFNNDFEPDNPSTWK,TSPGSPTSDTNAP…	GSFEDDEKEALK,IFNIYPR,SQDILAPDFSR,SSLMVGSYGPKPESFV,NFQVGFPEKPVLR,QIDNPNYKGEWIHPEIDNPEYQPDDALY,NCADVYNSGEK,KYESVNAVTK,LYSESLAR,SSILSNDMSSLK,MSVVIEGR,GINLSGGQK,QMHGDSPYL,GVADVTICQGK,ITWPGAR,LLEVEIEPGMHDGQEYPF,AYIATQGPLPETVDDFWR,TTQSVIVTGR,VEREPYNGPVIQLPTSQLPQIVSPSQR,SGTIFDNILVTD,ERETGIPPEQSMETAK,TIDIFNYVAYLR,NFLVFNNDFEPDNPSTWK,MFEEPEDPGAR,YGEYFPGTGDLR,FYNDADLDKGIQTSEDAKF,FNATQNHTACVESDSDGK,GEWIHPEID…	lcl|c226782_g6_i6|m.11785,lcl|c235052_g1_i3|m.20523,lcl|c242947_g1_i3|m.30437,lcl|c217230_g2_i5|m.5041,lcl|c226176_g1_i2|m.11271,lcl|c223432_g3_i4|m.9112,lcl|c224583_g1_i1|m.9971,lcl|c230102_g4_i3|m.14958,lcl|c232719_g2_i1|m.17712,lcl|c226782_g6_i4|m.11783,lcl|c214211_g3_i3|m.3396,lcl|c224583_g1_i3|m.9976,lcl|c226071_g2_i11|m.11178,lcl|c234711_g2_i8|m.20166,lcl|c223432_g3_i1|m.9111,lcl|c225476_g2…	lcl|c226782_g6_i6|m.11785,lcl|c235052_g1_i3|m.20523,lcl|c242947_g1_i3|m.30437,lcl|c217230_g2_i5|m.5041,lcl|c226176_g1_i2|m.11271,lcl|c223432_g3_i4|m.9112,lcl|c224583_g1_i1|m.9971,lcl|c230102_g4_i3|m.14958,lcl|c232719_g2_i1|m.17712,lcl|c226782_g6_i4|m.11783,lcl|c233521_g3_i3|m.18674,lcl|c214211_g3_i3|m.3396,lcl|c226071_g2_i11|m.11178,lcl|c224583_g1_i3|m.9976,lcl|c223432_g3_i1|m.9111,lcl|c226071_g2…	Q7FB56,Q7GB25,A7KVC2,Q4V7C7,Q54JR2,Q29I35,O42227,P32386,P54614,Q3UMM4,Q32PJ8,Q54LE6,O08553,Q8VZZ4,P32392,Q54V86,Q6NY64,O14786,Q8T6H3,Q5R9Y6,P52565,P30998,P28693,Q66LE6,Q02453,Q8T6H8,Q9QYM0,Q17GS9,P61158,P61157,O88563,Q9LZJ5,P50396,P56932,Q2EY14,P50398,Q61WW9,Q96E17,Q9UQ16,B8V7Q1,Q62188,P50399,Q64487,Q8IXJ6,Q4QQW4,Q9DC33,Q14117,Q6Q7J2,P10586,Q5T3U5,Q8VI56,Q02790,Q54VJ0,Q4R4J0,O35379,Q9H251,Q5RAG0,…	Q7FB56,Q7GB25,A7KVC2,Q4V7C7,Q54JR2,Q29I35,O42227,P32386,P54614,Q3UMM4,Q6V1P9,Q32PJ8,Q54LE6,O08553,Q8VZZ4,P32392,Q54V86,Q6NY64,O14786,Q8T6H3,Q5R9Y6,P52565,Q91757,P30998,P28693,Q66LE6,Q02453,Q8T6H8,Q9QYM0,Q17GS9,P61158,P61157,O88563,Q9LZJ5,P50396,P56932,Q2EY14,P50398,Q61WW9,Q9Z136,Q96E17,Q9UQ16,P59644,B8V7Q1,Q62188,P50399,Q64487,Q4QQW4,Q9DC33,Q14117,Q6Q7J2,Q9WV60,Q5YJC2,P10586,Q5T3U5,P31266,Q02790,…
GO:0106027	biological_process	neuron projection organization	0.0037124	310	0.00342411	280	-0.116621	0.326	1	0.00334945	0.00308384	-0.119195	0.315	1	0.846	DAWEISR,VAEIPFNSTNKY,EEDKGTTQDQQNTR,EEDKGTTQDQQNT,CVVVGDGAVGK,TPYPGMTNAETLAQVER,QKPTAVDSGEK,NILVGEGNVCK,LLHTSNITQAEQK,SIAYTLTSNIPEISPFLMF,LRPLSYPQTDVFLV,ATEEQQGTQSVR,LIFDNLK,GVGIISEGTETKEDVAAR,AAVGYEYK,DEEEAEEEAR,LLLPGNPSGTFLIR,KNPQAVLDVLN,GVGIISEGTETK,DPLNDKLVNER,LIEDDEYNAHQGAK,QGAIVAVTGDGVNDSPALKR,DSETMPGNYSLSIR,AAVPDAVSK,DEEEAEEEARR,TVEGSGHQESISIK,EGVLQAGDEIVGVNGK,TSAHASQK,QMNLSQQPK,TIVSVGDPK,…	WTAPEAALYQK,VAEIPFNSTNKY,EEDKGTTQDQQNTR,CVVVGDGAVGK,QKPTAVDSGEK,NILVGEGNVCK,LLHTSNITQAEQK,ATEEQQGTQSVR,LIFDNLK,GVGIISEGTETKEDVAAR,DEEEAEEEAR,LLLPGNPSGTFLIR,KNPQAVLDVLN,GVGIISEGTETK,DPLNDKLVNER,LIEDDEYNAHQGAK,TQEISYTDTK,QGAIVAVTGDGVNDSPALKR,DSETMPGNYSLSIR,TEAHASQLDHSK,AAVPDAVSK,DEEEAEEEARR,IAGLCNR,TVEGSGHQESISIK,EGVLQAGDEIVGVNGK,TIVSVGDPK,AESDIMKR,TVEGSGHQESI,DCSGDASESALMK,LIIVEGCQR,NVFDEAILAALEPP…	lcl|c213837_g2_i4|m.3221,lcl|c213837_g2_i3|m.3220,lcl|c234421_g4_i7|m.19822,lcl|c242947_g1_i3|m.30437,lcl|c225457_g2_i2|m.10643,lcl|c244023_g1_i1|m.31634,lcl|c234421_g4_i11|m.19820,lcl|c222950_g5_i5|m.8734,lcl|c234421_g4_i9|m.19825,lcl|c210724_g2_i3|m.2256,lcl|c234421_g4_i9|m.19827,lcl|c231865_g2_i1|m.16723,lcl|c222950_g5_i7|m.8739,lcl|c213837_g2_i4|m.3222,lcl|c244474_g2_i1|m.32252,lcl|c231865_g2…	lcl|c213837_g2_i4|m.3221,lcl|c213837_g2_i3|m.3220,lcl|c234421_g4_i7|m.19822,lcl|c242947_g1_i3|m.30437,lcl|c225457_g2_i2|m.10643,lcl|c244023_g1_i1|m.31634,lcl|c234421_g4_i11|m.19820,lcl|c227706_g1_i4|m.12692,lcl|c222950_g5_i5|m.8734,lcl|c234421_g4_i9|m.19825,lcl|c210724_g2_i3|m.2256,lcl|c234421_g4_i9|m.19827,lcl|c231865_g2_i1|m.16723,lcl|c222950_g5_i7|m.8739,lcl|c213837_g2_i4|m.3222,lcl|c244474_g2…	P27112,Q64541,P12931,Q02977,Q64392,P62998,P62999,Q01406,Q9YH26,Q5RCD8,Q60598,Q64436,P28693,Q9TV52,Q2KJ93,P13637,P13116,Q8VDN2,P13115,P39688,P17713,P40792,Q9N0Z6,P09626,D2WKD8,P13607,P18461,P34147,P58312,P19156,Q92030,P06241,Q92036,P42684,P27446,Q9WUD9,Q08DA1,Q8JH64,Q66HL2,Q62083,P18907,P04074,P60766,Q62844,P07947,P63001,P15054,P09572,P14084,Q9V9J3,P63000,Q9EP80,P24798,Q6PIE5,Q5RDR3,P24797,P25489,…	P27112,Q64541,P12931,Q02977,Q64392,P62998,P62999,Q01406,Q9YH26,Q5RCD8,Q60598,Q64436,Q91757,P28693,Q9TV52,Q2KJ93,P13637,P13116,Q8VDN2,P13115,P39688,P17713,P40792,Q9N0Z6,P09626,D2WKD8,P13607,P18461,P58312,P19156,Q92030,P06241,Q92036,P42684,P27446,Q9WUD9,Q9WV60,Q5YJC2,Q08DA1,Q8JH64,Q66HL2,Q62083,P18907,P04074,P60766,Q62844,P07947,P63001,P15054,P09572,P14084,Q9V9J3,P63000,Q9EP80,P24798,Q6PIE5,Q5RDR3,…
GO:0050769	biological_process	positive regulation of neurogenesis	0.0179872	1502	0.0185514	1517	0.044557	0.392	1	0.0161872	0.0166593	0.0414765	0.426	1	0.892	EEDKGTTQDQQNT,EEDKGTTQDQQNTR,GVGNPAPEINWIK,IFNIYPR,GAIGIFYGNK,YNPTEVGR,EVVEESTPVK,SLSSFGNAFLNR,IIGQQSGYIQSLPK,MSVVIEGR,EHALLAY,AATETGGSSSSQAR,GVADVTICQGK,AGAYDYPSPEWDTVTDEAK,IISFTELEELGK,GVVPALYGPPDVNAIVK,VNLAIWDTAGQER,TTQSVIVTGR,CFTIASVK,VEREPYNGPVIQLPTSQLPQIVSPSQR,AVPTDEAK,ERETGIPPEQSMETAK,NFLVFNNDFEPDNPSTWK,HLTYENVER,VLVCDNGTGFVK,YGEYFPGTGDLR,LGQVESWAQK,ASASEMDEQR,DIFVPVDDGEK,SGTPGSIQR,AQVWDTA…	EEDKGTTQDQQNTR,GVGNPAPEINWIK,IFNIYPR,VLNDQIFAVLNK,SLSSFGNAFLNR,MSVVIEGR,SSILSNDMSSLK,EHALLAY,AATETGGSSSSQAR,GVADVTICQGK,RIHNSPSPTTN,IISFTELEELGK,QIEFNLDVQER,TSDSGTYSCIADHPGGWTESAVAK,VNLAIWDTAGQER,TTQSVIVTGR,VPDGHSSSSASSR,CFTIASVK,KLEISEPR,VEREPYNGPVIQLPTSQLPQIVSPSQR,AVPTDEAK,ERETGIPPEQSMETAK,NFLVFNNDFEPDNPSTWK,HLTYENVER,DIKPENL,IWTLSDIDRDGQLDEEEF,VLVCDNGTGFVK,YGEYFPGTGDLR,LDISDEFQR,ASASEMDEQR,DIF…	lcl|c232426_g1_i1|m.17360,lcl|c242947_g1_i3|m.30437,lcl|c235115_g6_i1|m.20588,lcl|c227548_g2_i4|m.12564,lcl|c214211_g3_i3|m.3396,lcl|c222946_g2_i8|m.8729,lcl|c234711_g2_i8|m.20166,lcl|c222946_g2_i3|m.8728,lcl|c222946_g2_i1|m.8727,lcl|c243493_g3_i5|m.31030,lcl|c241105_g3_i3|m.28180,lcl|c238296_g3_i2|m.24349,lcl|c222307_g1_i1|m.8241,lcl|c230102_g4_i1|m.14957,lcl|c218214_g1_i1|m.5632,lcl|c229917_g4_…	lcl|c232426_g1_i1|m.17360,lcl|c242947_g1_i3|m.30437,lcl|c234064_g1_i2|m.19394,lcl|c235115_g6_i1|m.20588,lcl|c227548_g2_i4|m.12564,lcl|c221676_g4_i8|m.7788,lcl|c214211_g3_i3|m.3396,lcl|c222946_g2_i8|m.8729,lcl|c227572_g1_i1|m.12593,lcl|c222946_g2_i3|m.8728,lcl|c222946_g2_i1|m.8727,lcl|c221676_g4_i4|m.7786,lcl|c224773_g5_i3|m.10121,lcl|c238296_g3_i2|m.24349,lcl|c217583_g2_i1|m.5267,lcl|c230102_g4_i…	Q9SAF5,O73885,Q7ZXV3,P17427,P17426,Q9SX33,Q5NVM9,Q32PJ8,Q5R7D3,Q8VHF0,Q9N1U2,O14786,Q9UKU0,P52565,P30998,P98200,P51113,P28693,P98204,Q3MHJ9,P62490,P39688,P40792,O35114,P61158,P61157,P50396,P50398,Q66RN5,Q08E38,P49001,Q62188,P50399,Q64487,P61161,O60423,P61160,P62491,P62492,P62493,Q9VVI3,Q07327,P62494,Q4QQW4,P27448,P27446,Q9WUD9,P28656,P41753,O70589,Q6Q7J2,P91926,Q7L576,Q9LNQ4,Q5R1X2,Q299G2,O73723,…	Q9SAF5,O73885,Q7ZXV3,P17427,P17426,Q9SX33,Q5NVM9,Q32PJ8,Q5R7D3,Q8VHF0,Q9N1U2,Q9DB30,A5GFW1,P49138,O14786,Q9UKU0,P52565,P30998,P98200,Q91757,P51113,P28693,P98204,Q3MHJ9,P62490,P18652,P39688,Q9P225,P18653,P18654,Q8BKG3,P37276,P40792,O35114,O61661,E9Q8T7,P61158,P61157,Q8VHE6,P0C605,P50396,P50398,P23098,Q66RN5,Q08E38,P49001,Q62188,P50399,Q64487,P61161,Q8IVF4,O60423,P61160,P62491,P62492,P62493,Q9VVI3,…
GO:0098703	biological_process	calcium ion import across plasma membrane	0	0	1.22e-05	1	null	0.312	1	1.08e-05	2.19e-05	1.02715	0.553	1	0.892		IVLATER		lcl|c243489_g1_i4|m.31021		Q697L1
GO:0019953	biological_process	sexual reproduction	0.0102869	859	0.00920842	753	-0.159788	0.0257	1	0.00926215	0.0082748	-0.162622	0.0232	1	0.244	TGEDGDFLWPGFGENCR,VVPEFDTPGHTF,IGIQVTDSPYVV,EYYDEQLGDDLPQAVLDE,DPFAMRPFFGYNFGR,VLGDGDFVK,GNFDSLPVK,TDPHDVAR,TMYMIPFSMGPVGSPVSK,YITGAFPSACGK,LLMEGETINDLMALSPEEILLR,SVTDLTDAENR,VQDYVADKVK,VQDYVADK,LREYYDEQLGDDLPQAV,EQLDVSGGTSESSAEGTK,VLSPPSAYLTSYTVWGALR,AINPESGFFGVAPGSSY,TYICTENK,MGDNVMEVLDDGDFVK,VYLPINAATSDVFEK,EAFDQFDLDR,MLQMADK,HYVNVPIILK,HSYSEAER,LVICDGSQEENEGLLK,QYYDEQLGEDLPQEVSDELNALESR,MINLS…	TGEDGDFLWPGFGENCR,VVPEFDTPGHTF,DPFAMRPFFGYNFGR,FIFTITGQSSDVLEDAIER,VLGDGDFVK,GNFDSLPVK,TDPHDVAR,TMYMIPFSMGPVGSPVSK,YITGAFPSACGK,LLMEGETINDLMALSPEEILLR,SVTDLTDAENR,VQDYVADKVK,VQDYVADK,LREYYDEQLGDDLPQAV,DPSIATSQAVLDLVDAIKPGVV,EQLDVSGGTSESSAEGTK,AINPESGFFGVAPGSS,VLSPPSAYLTSYTVWGALR,AINPESGFFGVAPGSSY,TVMRDPF,MGDNVMEVLDDGDFVK,VYLPINAATSDVFEK,MLQMADK,HYVNVPIILK,HSYSEAER,IFHVNWFR,LVICDGSQEENEGLLK,QYYDEQ…	lcl|c243059_g4_i2|m.30566,lcl|c215957_g2_i7|m.4321,lcl|c224672_g2_i1|m.10058,lcl|c243059_g4_i3|m.30568,lcl|c215957_g2_i1|m.4320,lcl|c224672_g1_i1|m.10055,lcl|c222555_g2_i4|m.8428,lcl|c215957_g2_i1|m.4319,lcl|c215957_g2_i7|m.4322	lcl|c243059_g4_i2|m.30566,lcl|c215957_g2_i7|m.4321,lcl|c224672_g2_i1|m.10058,lcl|c243059_g4_i3|m.30568,lcl|c215957_g2_i1|m.4320,lcl|c224672_g1_i1|m.10055,lcl|c222555_g2_i4|m.8428,lcl|c215957_g2_i1|m.4319,lcl|c215957_g2_i7|m.4322	Q9Z755,Q0V8R6,Q869Z4,Q5L4X1,Q3V0K9,P20060,Q16822,A6H742,Q5R5J1,Q05893,Q256B8,P35558,O88818,Q61233,C0ZRP8,Q63598,P29190,P54680,P05153,Q6P698,Q8HYZ4,P21642,P07379,Q99K51,Q821M4,Q9WUK2,P13796,P13797,Q9PLL6,Q29548,P20007,A7E3Q8,Q9Z2V4,P07686,Q8BH04,A3DJE3	Q9Z755,Q0V8R6,Q869Z4,Q5L4X1,Q3V0K9,P20060,Q16822,A6H742,Q5R5J1,Q05893,Q256B8,P35558,O88818,Q61233,C0ZRP8,Q63598,P29190,P54680,P05153,Q6P698,Q8HYZ4,P21642,P07379,Q99K51,Q821M4,Q9WUK2,P13796,P13797,Q9PLL6,Q29548,P20007,A7E3Q8,Q9Z2V4,P07686,Q8BH04,A3DJE3
GO:0050766	biological_process	positive regulation of phagocytosis	0.00567637	474	0.00541744	443	-0.0673596	0.479	1	0.00511572	0.00487269	-0.0702181	0.46	1	0.892	NQVAMNPTNTIFDAK,FDDASVQSDMK,VPVGDQPPDIEMLIR,GEWIHPEIDNPEYQPDDALYKY,VFDSSLDQK,QIDNPNYKGEWIHPEIDNPEYQPDDALY,QIDNPNYKGEWIHPEIDNPEYQPDDAL,GMEDLIPIMNK,EIVAETDRETGSNK,GMTTSNNLLGK,TSNLNEELGQVR,QVDENEAR,TLVVQFQVK,EVDEVVLVGGSTR,AIEGGGDSIDTK,FYNDADLDKGIQTSEDAKF,GEWIHPEIDNPEYQPDDA,LSKDDIDR,TTPSYVAFTENER,MKDEQDEK,LGFPDVIMPGDIR,SMAGEIGTLDPQMER,HEQSIDCGGGYVK,FYNDADLDK,SGTIFDNILVTDSVE,IKDPEAK,GEWIHPEIDNPEYQPDDA…	NQVAMNPTNTIFDAK,TLAENLGLK,FDDASVQSDMK,FYNDADLDK,VGLFTPDMAFEAIVK,SGTIFDNILVTDSVE,IKDPEAK,VFDSSLDQK,GEWIHPEIDNPEYQPDDAL,QIDNPNYKGEWIHPEIDNPEYQPDDALY,QKELESICNPIITK,FEDESYTDKWVEST,CKDDEFTHL,QIDNPNYK,QIDNPNYKGEWIHPEIDNPEYQPDDAL,SSVLENFVGR,TVVLGDDNIDNR,ITITNDK,ELESICNPIITK,QMHGDSPYL,SGTIFDNILVTDSVEYAETFAK,TSNLNEELGQVR,FDEPFSNEGK,WVESTFK,QVDENEAR,TNGAPGAMVFK,SGTIFDNILVTD,GEWIHPEIDNPEYQPDDALY,GIQTSEDAK,…	lcl|c217466_g1_i2|m.5214,lcl|c217466_g1_i3|m.5215,lcl|c234785_g1_i5|m.20254,lcl|c219953_g4_i1|m.6659,lcl|c219953_g4_i2|m.6660,lcl|c231968_g5_i8|m.16847,lcl|c241251_g1_i2|m.28363,lcl|c231968_g5_i3|m.16844,lcl|c241251_g1_i1|m.28362,lcl|c237490_g5_i6|m.23318,lcl|c234785_g1_i10|m.20251,lcl|c231881_g1_i2|m.16748,lcl|c239343_g4_i4|m.25612	lcl|c217466_g1_i2|m.5214,lcl|c217466_g1_i3|m.5215,lcl|c234785_g1_i5|m.20254,lcl|c227203_g2_i6|m.12238,lcl|c219953_g4_i1|m.6659,lcl|c219953_g4_i2|m.6660,lcl|c241251_g1_i2|m.28363,lcl|c227203_g2_i8|m.12242,lcl|c241251_g1_i1|m.28362,lcl|c227203_g2_i2|m.12236,lcl|c237490_g5_i6|m.23318,lcl|c234785_g1_i10|m.20251,lcl|c231881_g1_i2|m.16748,lcl|c239343_g4_i4|m.25612,lcl|c227203_g2_i7|m.12240	Q8N1I0,O73885,Q9SAF5,P32660,Q9Y2G3,Q9SX33,Q5NVM9,Q5R7D3,Q4R888,P17156,P70704,Q9N1U2,Q7YQC6,Q8CIQ7,P26413,Q12675,P98200,P98204,Q92608,Q28222,P16627,Q5BL50,Q9QZW0,Q9U639,P14211,Q01877,P39054,P39053,A2Q0Z1,P39055,Q14185,P39052,Q91233,Q9N0Z4,B2RY04,Q148W0,Q9LI83,P08418,Q8TF62,Q9Y2Q0,P59764,P11147,P14659,Q9UQ16,Q8BUR4,O60423,P22954,Q24789,Q05944,P22953,P23640,P41753,A3FIN4,P34933,P34931,Q8C3J5,P34930,…	Q8N1I0,O73885,Q9SAF5,P32660,Q9Y2G3,Q9SX33,Q5NVM9,Q5R7D3,Q4R888,P17156,P70704,Q9N1U2,Q7YQC6,Q8CIQ7,P26413,Q12675,P98200,P98204,Q92608,Q28222,P16627,Q5BL50,Q9QZW0,Q9U639,P35248,P14211,Q01877,P39054,P39053,A2Q0Z1,P39055,Q14185,P39052,Q91233,Q9N0Z4,B2RY04,Q148W0,Q9LI83,P08418,Q8TF62,Q9Y2Q0,P59764,P11147,P14659,Q9UQ16,Q8BUR4,O60423,P22954,Q24789,Q05944,P22953,P23640,P41753,A3FIN4,P34933,P34931,Q8C3J5,…
GO:0050767	biological_process	regulation of neurogenesis	0.026358	2201	0.0263534	2155	-0.000251	0.995	1	0.0237154	0.0236611	-0.00330759	0.939	1	0.992	IFNIYPR,GAIGIFYGNK,YNPTEVGR,IIGQQSGYIQSLPK,VYWSDVDAK,AAVGYEYK,AGAYDYPSPEWDTVTDEAK,IISFTELEELGK,IGSSGAPVTDQSEETR,VNLAIWDTAGQER,VEREPYNGPVIQLPTSQLPQIVSPSQR,ERETGIPPEQSMETAK,HLTYENVER,YGEYFPGTGDLR,VLVCDNGTGFVK,SGTPGSIQR,VFDILDFR,SMAGEIGTLDPQMER,SGIPLYFSNK,AVNSDLLETR,FINLFPEIK,SPYLYPLYGLGELPQA,VVTGQLQPNR,FEAPEALFQPHLI,KDPEAETEK,GEWIHPEIDNPEYQPDDAL,TLDEIQNLDADDESLV,IGASVTDEEK,FESLVEK,SSVLENFVGR,VEVMGF…	IFNIYPR,VLNDQIFAVLNK,SSILSNDMSSLK,IISFTELEELGK,IGSSGAPVTDQSEETR,VNLAIWDTAGQER,LGSSQADVGLALGELYGNVFSQ,VPDGHSSSSASSR,VEREPYNGPVIQLPTSQLPQIVSPSQR,ERETGIPPEQSMETAK,HLTYENVER,YGEYFPGTGDLR,VLVCDNGTGFVK,VFDILDFR,NEFDLESK,TIRPDNMSEYTK,LADVETVVSNK,FINLFPEIK,SPYLYPLYGLGELPQA,LSSGSWGCCPLRK,VVTGQLQPNR,FEAPEALFQPHLI,MGSSSAAAAAEASH,KDPEAETEK,GEWIHPEIDNPEYQPDDAL,TLDEIQNLDADDESLV,IGASVTDEEK,FESLVEK,SSVLENFVGR,SP…	lcl|c242947_g1_i3|m.30437,lcl|c235115_g6_i1|m.20588,lcl|c232719_g2_i1|m.17712,lcl|c226071_g2_i11|m.11178,lcl|c222946_g2_i3|m.8728,lcl|c234711_g2_i8|m.20166,lcl|c223432_g3_i1|m.9111,lcl|c222946_g2_i1|m.8727,lcl|c236422_g1_i6|m.22099,lcl|c237457_g1_i3|m.23289,lcl|c226071_g2_i7|m.11182,lcl|c241105_g3_i3|m.28180,lcl|c241817_g1_i2|m.28964,lcl|c238296_g3_i2|m.24349,lcl|c222307_g1_i1|m.8241,lcl|c230102_…	lcl|c242947_g1_i3|m.30437,lcl|c235115_g6_i1|m.20588,lcl|c221676_g4_i8|m.7788,lcl|c232224_g3_i2|m.17159,lcl|c232719_g2_i1|m.17712,lcl|c227572_g1_i1|m.12593,lcl|c226071_g2_i11|m.11178,lcl|c222946_g2_i3|m.8728,lcl|c223432_g3_i1|m.9111,lcl|c222946_g2_i1|m.8727,lcl|c221676_g4_i4|m.7786,lcl|c226071_g2_i7|m.11182,lcl|c224773_g5_i3|m.10121,lcl|c241817_g1_i2|m.28964,lcl|c238296_g3_i2|m.24349,lcl|c235441_g…	Q0VCZ3,Q9SAF5,O73885,Q7ZXV3,P17427,P17426,P54614,Q9SX33,Q5NVM9,Q54LE6,Q5R7D3,Q32PJ8,Q8VHF0,Q9N1U2,Q54V86,Q6NY64,O14786,Q9UKU0,Q8T6H3,P52565,P30998,P98200,P51113,P28693,P98204,Q3MHJ9,Q66LE6,P62490,P39688,Q8T6H8,P40792,O35114,O35598,P61158,P61157,Q9LZJ5,P50396,P56932,P50398,Q66RN5,Q08E38,P49001,Q62188,P50399,Q64487,P61161,O60423,Q8IXJ6,P61160,P62491,P62492,P62493,Q9VVI3,Q07327,P62494,Q4QQW4,Q9DC33,…	Q0VCZ3,Q9SAF5,O73885,Q7ZXV3,P17427,P17426,P54614,Q9SX33,Q5NVM9,Q6V1P9,Q54LE6,Q5R7D3,Q32PJ8,Q8VHF0,Q9N1U2,Q54V86,Q9DB30,Q6NY64,A5GFW1,P49138,O14786,Q9UKU0,Q68FS3,Q8T6H3,P52565,P30998,P98200,Q91757,P51113,P28693,P98204,Q3MHJ9,Q66LE6,P62490,P18652,P39688,Q8T6H8,P18653,Q9P225,P18654,Q8BKG3,P37276,P40792,O35114,O35598,O61661,E9Q8T7,P61158,P61157,Q9LZJ5,Q8VHE6,P0C605,P50396,P56932,P50398,P23098,Q66RN5,…
GO:0050764	biological_process	regulation of phagocytosis	0.00871815	728	0.00856028	700	-0.0263628	0.729	1	0.00785129	0.00769315	-0.0293547	0.699	1	0.932	VPVGDQPPDIEMLIR,LPGGSWGPSTVPWTDVR,QIDNPNYKGEWIHPEIDNPEYQPDDALY,ASSLPDVDTFGK,GMEDLIPIMNK,EIVAETDRETGSNK,LQEEEENRTEQLSK,QATGPLSNEDVIAAQPFMR,QVDENEAR,NLPDEHDDLNK,EVDEVVLVGGSTR,LIEDDEYNAHQGAK,FYNDADLDKGIQTSEDAKF,VTVVVLGPGDEAPSTSK,GEWIHPEIDNPEYQPDDA,DIEDDIESNLLMPV,TTPSYVAFTENER,IEDLAVEPQR,MKDEQDEK,SDPFVIIK,SMAGEIGTLDPQMER,HEQSIDCGGGYVK,GVEAPEPR,WDTGPDETR,FYNDADLDK,EDDDDDTNAESEK,SGTIFDNILVTDSVE,GEWIHPE…	LPGGSWGPSTVPWTDVR,QIDNPNYKGEWIHPEIDNPEYQPDDALY,ASSLPDVDTFGK,NLPSTNPIECTVR,QMHGDSPYL,LQEEEENRTEQLSK,QATGPLSNEDVIAAQPFMR,QVDENEAR,NLPDEHDDLNK,SGTIFDNILVTD,LIEDDEYNAHQGAK,FYNDADLDKGIQTSEDAKF,VTVVVLGPGDEAPSTSK,GEWIHPEIDNPEYQPDDA,DIEDDIESNLLMPV,QSEKPLEILEK,TTPSYVAFTENER,IEDLAVEPQR,MKDEQDEK,SDPFVIIK,QIDNPNYKGEWIHPEIDNPEYQPDDALYK,TIELQLK,HEQSIDCGGGYVK,GWIDVVNDKQK,GVEAPEPR,WDTGPDETR,FYNDADLDK,VGLFTPDMAFE…	lcl|c240720_g1_i1|m.27657,lcl|c234785_g1_i5|m.20254,lcl|c244023_g1_i1|m.31634,lcl|c227937_g1_i7|m.12905,lcl|c219953_g4_i2|m.6660,lcl|c231968_g5_i8|m.16847,lcl|c210724_g2_i3|m.2256,lcl|c231968_g5_i3|m.16844,lcl|c240720_g1_i1|m.27658,lcl|c237490_g5_i6|m.23318,lcl|c240720_g1_i1|m.27659,lcl|c231881_g1_i2|m.16748,lcl|c223277_g3_i4|m.8995,lcl|c235787_g4_i1|m.21333,lcl|c210724_g2_i1|m.2253,lcl|c214670_g…	lcl|c240720_g1_i1|m.27657,lcl|c234785_g1_i5|m.20254,lcl|c244023_g1_i1|m.31634,lcl|c219953_g4_i2|m.6660,lcl|c210724_g2_i3|m.2256,lcl|c227203_g2_i8|m.12242,lcl|c240720_g1_i1|m.27658,lcl|c237490_g5_i6|m.23318,lcl|c240720_g1_i1|m.27659,lcl|c231881_g1_i2|m.16748,lcl|c223277_g3_i4|m.8995,lcl|c235787_g4_i1|m.21333,lcl|c210724_g2_i1|m.2253,lcl|c227203_g2_i7|m.12240,lcl|c214670_g8_i2|m.3578,lcl|c217466_g1…	Q9SAF5,O73885,Q9Y2G3,Q9SX33,Q5NVM9,Q5R7D3,Q9N1U2,Q8CIQ7,P05696,P98200,P98204,Q92608,P39688,Q5SPC5,Q9LI83,Q8TF62,O75923,P59764,Q9UQ16,O60423,Q05944,P23640,P27446,Q9WUD9,P41753,P10102,Q04967,Q9LNQ4,Q6S4N2,Q8JH64,Q91291,P24629,Q7LZQ8,P55063,Q9W6Y1,P22202,P05126,P98198,P98197,P05128,P05129,P98199,P50570,Q25378,Q8BZ98,P15054,Q9TUG3,P14084,Q9V9J3,P05130,Q90473,Q8IZD9,Q9ESF1,Q2WGJ9,O43520,Q08877,B3DLH6,…	Q9SAF5,O73885,Q9Y2G3,Q9SX33,Q5NVM9,Q5R7D3,Q9N1U2,Q8CIQ7,P05696,P98200,P98204,Q92608,P39688,Q5SPC5,Q9LI83,Q8TF62,O75923,P59764,Q9UQ16,O60423,Q05944,P23640,P27446,Q9WUD9,P41753,P10102,Q04967,Q9LNQ4,Q6S4N2,Q8JH64,Q91291,P24629,Q7LZQ8,P55063,Q9W6Y1,P22202,P05126,P98198,P98197,P05128,P05129,P98199,P50570,Q25378,Q8BZ98,P15054,Q9TUG3,P14084,Q9V9J3,P05130,Q90473,Q8IZD9,Q9ESF1,Q2WGJ9,O43520,Q08877,B3DLH6,…
GO:0019954	biological_process	asexual reproduction	0.000132	11	0.000183	15	0.47768	0.402	1	0.000129	0.000176	0.442187	0.42	1	0.892	IADFGLAR,VVSQNPSER,IQEAAIVDNLK,NFVGDYIGYDDNPALR,FITDSTVEER,NMLIDQENQCVIISGESGAGK	IADFGLAR,VVSQNPSER,LQQEGSR,KADGTPDGR,NFVGDYIGYDDNPALR,DLIEIMQTSENPFIR,FITDSTVEER,NMLIDQENQCVIISGESGAGK	lcl|c226782_g6_i6|m.11785,lcl|c235052_g1_i3|m.20523,lcl|c221061_g4_i1|m.7355,lcl|c235052_g1_i4|m.20524,lcl|c226176_g1_i2|m.11271,lcl|c221061_g4_i2|m.7358,lcl|c235052_g1_i6|m.20525,lcl|c232719_g2_i1|m.17712,lcl|c226782_g6_i4|m.11783,lcl|c213237_g2_i2|m.2995,lcl|c226782_g6_i5|m.11784,lcl|c221431_g3_i2|m.7619,lcl|c236793_g3_i7|m.22527,lcl|c217405_g1_i6|m.5180,lcl|c233141_g1_i1|m.18196,lcl|c213203_g1…	lcl|c226782_g6_i6|m.11785,lcl|c235052_g1_i3|m.20523,lcl|c221061_g4_i1|m.7355,lcl|c235052_g1_i4|m.20524,lcl|c226176_g1_i2|m.11271,lcl|c221061_g4_i2|m.7358,lcl|c235052_g1_i6|m.20525,lcl|c232719_g2_i1|m.17712,lcl|c226782_g6_i4|m.11783,lcl|c213237_g2_i2|m.2995,lcl|c226782_g6_i5|m.11784,lcl|c221431_g3_i2|m.7619,lcl|c236793_g3_i7|m.22527,lcl|c217405_g1_i6|m.5180,lcl|c233141_g1_i1|m.18196,lcl|c213203_g1…	Q2US45,Q05096,O64771,O43795,A4RE77,A1C4A5,Q59MQ0,A5E4A8,F4JY24,Q3UMM4,Q04439,P34092,Q24368,A3LYL7,A8N2Y6,Q2HDI2,Q6CVE9,P20794,Q9Y7Z8,Q7T6X2,Q6PGB8,P10569,Q6FN18,P28370,Q758Q9,A8PWF6,O00160,A5DKH0,Q6FN53,Q7Z8J6,P27636,Q92002,A7TDZ8,E9Q634,P22467,P46735,Q91ZW3,Q61851,Q0CEX5,P34109,Q12965,A1DBH2,P18460,P36006,P0CP01,Q6BUQ2,A2R5J1,P0CP00,P70248,Q63356,P42522,A6SED8,Q4WC55,Q00535,P19706,Q5ZKN1,Q00534,…	Q2US45,Q05096,O64771,O43795,A4RE77,A1C4A5,Q59MQ0,A5E4A8,F4JY24,Q3UMM4,Q04439,P34092,Q24368,A3LYL7,A8N2Y6,Q2HDI2,Q6CVE9,P20794,Q9Y7Z8,Q7T6X2,Q6PGB8,P10569,Q6FN18,P28370,Q758Q9,A8PWF6,O00160,A5DKH0,Q6FN53,Q7Z8J6,P27636,Q92002,A7TDZ8,E9Q634,P22467,P46735,Q91ZW3,Q61851,Q0CEX5,P34109,Q12965,A1DBH2,P18460,P36006,P0CP01,Q6BUQ2,A2R5J1,P0CP00,P70248,Q63356,P42522,A6SED8,Q4WC55,Q00535,P19706,Q5ZKN1,Q00534,…
GO:0050765	biological_process	negative regulation of phagocytosis	0.00262263	219	0.00295941	242	0.174297	0.194	1	0.00236939	0.00266681	0.170602	0.203	1	0.75	MSDIYVK,TFNLFAQK,EIESFVQR,LPGGSWGPSTVPWTDVR,ASSLPDVDTFGK,VNGQEPPSPR,VTVAEQQR,LQEEEENR,LQEEEENRTEQLSK,TSNLNEELGQVR,GFNDFIATFPLR,QATGPLSNEDVIAAQPFMR,VDSATPGVNELDLK,LTIMEEASK,NLPDEHDDLNK,IQLWVDIFPK,VTVVVLGPGDEAPSTSK,DIEDDIESNLLMPV,LVGLLAGENENDK,IEDLAVEPQR,SDPFVIIK,TEGDFNVFAETYENEVK,GVEAPEPR,WDTGPDETR,DIEDDIESNLLMPVGVVR,EDDDDDTNAESEK,SMDGDGNFNWR,QAAELSDVSNDPK,SDPYASVQFQGIK,DEDEEEGAPK,GEFGDVLQGIYK,LIA…	MSDIYVK,EIESFVQR,LPGGSWGPSTVPWTDVR,ASSLPDVDTFGK,NLPSTNPIECTVR,VNGQEPPSPR,VTVAEQQR,LQEEEENR,LQEEEENRTEQLSK,TSNLNEELGQVR,GFNDFIATFPLR,QATGPLSNEDVIAAQPFMR,VDSATPGVNELDLK,NLPDEHDDLNK,VTVVVLGPGDEAPSTSK,DIEDDIESNLLMPV,QSEKPLEILEK,IEDLAVEPQR,SDPFVIIK,TIELQLK,DDLIGETVIDLEQR,GWIDVVNDKQK,GVEAPEPR,GQDVNDHPEIPGK,WDTGPDETR,DIEDDIESNLLMPVGVVR,SMDGDGNFNWR,QAAELSDVSNDPK,DEDEEEGAPK,GEFGDVLQGIYK,LIAMLSSVFDNLVR,KIL…	lcl|c240720_g1_i1|m.27657,lcl|c214670_g8_i2|m.3578,lcl|c234785_g1_i5|m.20254,lcl|c206351_g3_i5|m.1528,lcl|c227937_g1_i7|m.12905,lcl|c240720_g1_i3|m.27662,lcl|c240720_g1_i1|m.27658,lcl|c240720_g1_i1|m.27659,lcl|c222750_g1_i9|m.8600,lcl|c234785_g1_i10|m.20251,lcl|c235787_g4_i1|m.21333,lcl|c206351_g3_i3|m.1527,lcl|c236822_g3_i10|m.22574	lcl|c240720_g1_i1|m.27657,lcl|c214670_g8_i2|m.3578,lcl|c234785_g1_i5|m.20254,lcl|c206351_g3_i5|m.1528,lcl|c227203_g2_i6|m.12238,lcl|c240720_g1_i3|m.27662,lcl|c227203_g2_i8|m.12242,lcl|c240720_g1_i1|m.27658,lcl|c227203_g2_i2|m.12236,lcl|c240720_g1_i1|m.27659,lcl|c222750_g1_i9|m.8600,lcl|c234785_g1_i10|m.20251,lcl|c235787_g4_i1|m.21333,lcl|c206351_g3_i3|m.1527,lcl|c227203_g2_i7|m.12240,lcl|c236822_…	P98198,P98197,P98199,Q9SAF5,P32660,Q9Y2G3,Q9SX33,P70704,A6QQP7,Q9ESF1,Q9HC10,Q12675,Q9LK90,Q2WGJ9,P98200,A0AVI2,O43520,P98204,B3DLH6,Q5BL50,Q9QZW0,P39524,P32577,Q8NB49,P41241,P41240,Q5SPC5,Q9ERC5,Q9N0Z4,Q148W0,Q9U280,Q9LI83,Q8TF62,O75923,Q9Y2Q0,Q9XIE6,O60423,Q9ESD7,P57792,Q9NTI2,Q9NZM1,A3FIN4,Q69ZN7,Q9CPX6,C7EXK4,P0DM40,O94296,Q29449,Q9LNQ4,P98196	P98198,P98197,P98199,Q9SAF5,P32660,Q9Y2G3,Q9SX33,P70704,A6QQP7,Q9ESF1,Q9HC10,Q12675,Q9LK90,Q2WGJ9,P98200,A0AVI2,O43520,P98204,B3DLH6,Q5BL50,Q9QZW0,P39524,P35248,P32577,Q8NB49,P41241,P41240,Q5SPC5,Q9ERC5,Q9N0Z4,Q148W0,Q9U280,Q9LI83,Q8TF62,O75923,Q9Y2Q0,Q9XIE6,O60423,Q9ESD7,P57792,Q9NTI2,Q9NZM1,A3FIN4,Q69ZN7,Q9CPX6,C7EXK4,P0DM40,O94296,Q29449,Q9LNQ4,P0C862,P98196
GO:0019935	biological_process	cyclic-nucleotide-mediated signaling	0.00166459	139	0.00156531	128	-0.0887203	0.615	1	0.00150779	0.00141572	-0.0909061	0.605	1	0.908	SPNEDYIEVSR,ILLLGAGESGK,GAVSAGPITEDEATSYVK,EEEKPSEEAEVANDATTPEEVK,MVDVGGQR,IKGNPEEVTMLVI,INQEIER,VIEVNGANVEGETHNDVVKR,LANPNNQFR,HEIEDQPGPF,SGQTISAVDDNSEAQK,QLNEVLDKEDSSSPPEPTPE,HGAGETVIQQGDEGDNF,LLLLGTGESGK,IAKPDYLPTEQDVLR,AVVEYPFHCCLITNMK,EAAINYAEK,NVTTFETSYYEATR,LVDFGFAK,APTSGIIEYPFDLETI,SLWNDQGMQECYDR,EYQLSDSAK,EEEKPSEEAEVAN,VIEVNGANVEGETHNDVVK,ESTEPAAAEDEK,IAKPDYLPTEQDVL,TLGVGGFGR,NAMQSGTFNTR…	ILMGSQIR,SPNEDYIEVSR,ILLLGAGESGK,TVDGYVILAAAGNLFA,GAVSAGPITEDEATSYVK,WFDGFNWEGLR,RGAVSAGPITEDEATSYVK,EEEKPSEEAEVANDATTPEEVK,MVDVGGQR,APTSGIIEYPFDLETIIFR,INQEIER,TKAEQDEFAK,IFEEGECIIR,HEIEDQPGPF,KQEGDAEALR,SGQTISAVDDNSEAQK,QLNEVLDKEDSSSPPEPTPEFQPTTV,EFEAEPQDHSEPEQK,HGAGETVIQQGDEGDNF,TVTAELLR,LLLLGTGESGK,IAKPDYLPTEQDVLR,EAAINYAEK,APTSGIIEYPFDLETI,YFFDNLER,SDIFDAMSLVK,ARAPTSGIIEYPF,DIKPENL,SLWNDQGMQ…	lcl|c233215_g1_i5|m.18281,lcl|c230360_g10_i2|m.15204,lcl|c224226_g3_i4|m.9666,lcl|c230360_g10_i5|m.15205,lcl|c237286_g1_i3|m.23120,lcl|c236283_g1_i1|m.21952,lcl|c224226_g3_i3|m.9665,lcl|c164490_g1_i1|m.440,lcl|c231142_g1_i4|m.15993,lcl|c221802_g2_i1|m.7868,lcl|c233215_g1_i8|m.18283,lcl|c225423_g3_i2|m.10600,lcl|c231142_g1_i2|m.15992,lcl|c214653_g2_i1|m.3571,lcl|c219710_g2_i1|m.6538,lcl|c219710_g2…	lcl|c234064_g1_i4|m.19396,lcl|c233215_g1_i5|m.18281,lcl|c234064_g1_i2|m.19394,lcl|c242662_g1_i1|m.30100,lcl|c221676_g4_i8|m.7788,lcl|c225854_g1_i4|m.10994,lcl|c221676_g4_i4|m.7786,lcl|c224773_g5_i3|m.10121,lcl|c219710_g2_i1|m.6538,lcl|c219710_g2_i2|m.6539,lcl|c176630_g1_i1|m.578,lcl|c217583_g2_i1|m.5267,lcl|c227927_g4_i1|m.12894,lcl|c230360_g10_i2|m.15204,lcl|c230360_g10_i5|m.15205,lcl|c237286_g1…	Q9WUT3,P08239,Q15418,Q13976,Q0MQH0,Q63531,Q9JJ19,Q5REL1,P09471,Q21734,Q7TPS0,O43181,P10825,Q15349,P51812,Q02375,P10665,P10644,P10666,P18652,Q6PFQ0,P18653,P30730,Q5XIF3,P18654,P00516,P82471,Q7PD79,Q14344,O16118,P21279,Q9UK32,P0C605	P08239,Q6GPN6,P11801,Q15418,Q96BR1,Q13557,Q0MQH0,Q63531,Q09137,O75582,Q9JJ19,Q5RCC4,Q6DE87,Q5REL1,Q21734,Q9DB30,A5GFW1,P49138,Q9HAR2,Q923T9,Q15349,P28652,Q3MHJ9,D2I3C6,P11730,Q02375,Q9JLM8,P10644,P18652,Q6PFQ0,Q9UQM7,P18653,Q2HJF7,P18654,Q5XIF3,P13234,Q5ZKI0,P82471,B8VIW9,Q9DG02,Q5R7A7,Q7PD79,Q5MPA9,O61661,Q16566,P08413,Q14344,P0C605,A8WXF6,Q9WUT3,Q8IW41,Q6PHZ2,Q13976,Q8BRK8,A8X6H4,Q91ZN7,O95490,…
GO:0061430	biological_process	bone trabecula morphogenesis	1.2e-05	1	8.56e-05	7	2.83758	0.0315	1	2.15e-05	8.78e-05	2.02715	0.0539	1	0.4	IADFGLAR	IADFGLAR	lcl|c226782_g6_i6|m.11785,lcl|c235052_g1_i3|m.20523,lcl|c221061_g4_i1|m.7355,lcl|c235052_g1_i4|m.20524,lcl|c226176_g1_i2|m.11271,lcl|c221061_g4_i2|m.7358,lcl|c235052_g1_i6|m.20525,lcl|c232719_g2_i1|m.17712,lcl|c226782_g6_i4|m.11783,lcl|c213237_g2_i2|m.2995,lcl|c226782_g6_i5|m.11784,lcl|c221431_g3_i2|m.7619,lcl|c233141_g1_i1|m.18196,lcl|c213203_g1_i1|m.2991,lcl|c234378_g4_i3|m.19775,lcl|c224073_g3…	lcl|c226782_g6_i6|m.11785,lcl|c235052_g1_i3|m.20523,lcl|c221061_g4_i1|m.7355,lcl|c235052_g1_i4|m.20524,lcl|c226176_g1_i2|m.11271,lcl|c221061_g4_i2|m.7358,lcl|c235052_g1_i6|m.20525,lcl|c232719_g2_i1|m.17712,lcl|c226782_g6_i4|m.11783,lcl|c213237_g2_i2|m.2995,lcl|c226782_g6_i5|m.11784,lcl|c221431_g3_i2|m.7619,lcl|c233141_g1_i1|m.18196,lcl|c213203_g1_i1|m.2991,lcl|c234378_g4_i3|m.19775,lcl|c224073_g3…	Q61851,Q7T6X2,O64771,A8WIP6,P18460,Q3UMM4,Q00535,Q5ZKN1,P22607,Q00534,P43450,Q8N165,Q6NU47,Q6FN53,O22042,P08630,P27636,Q6P3Q4,P20794	Q61851,Q7T6X2,O64771,A8WIP6,P18460,Q3UMM4,Q00535,Q5ZKN1,P22607,Q00534,P43450,Q8N165,Q6NU47,Q6FN53,O22042,P08630,P27636,Q6P3Q4,P20794
GO:0019934	biological_process	cGMP-mediated signaling	0.000216	18	0.000318	26	0.560735	0.202	1	0.000205	0.000296	0.53411	0.214	1	0.768	SPNEDYIEVSR,GAVSAGPITEDEATSYVK,HEIEDQPGPF,LVDFGFAK,TLGVGGFGR,HGAGETVIQQGDEGDNF	ILMGSQIR,SPNEDYIEVSR,GAVSAGPITEDEATSYVK,RGAVSAGPITEDEATSYVK,WFDGFNWEGLR,SDIFDAMSLVK,DIKPENL,DIKPENLL,TKAEQDEFAK,IFEEGECIIR,HEIEDQPGPF,KQEGDAEALR,NVAPEQLNEVLDAMFEK,TLGVGGFGR,EFEAEPQDHSEPEQK,HGAGETVIQQGDEGDNF,LTVADALEAVT	lcl|c221802_g2_i1|m.7868,lcl|c231142_g1_i4|m.15993,lcl|c225423_g3_i2|m.10600,lcl|c237286_g1_i3|m.23120,lcl|c231142_g1_i2|m.15992,lcl|c231142_g1_i8|m.15994	lcl|c234064_g1_i4|m.19396,lcl|c210586_g1_i2|m.2213,lcl|c234064_g1_i2|m.19394,lcl|c210586_g1_i1|m.2212,lcl|c239574_g1_i2|m.26000,lcl|c210586_g1_i4|m.2214,lcl|c242662_g1_i1|m.30100,lcl|c229547_g1_i1|m.14385,lcl|c221676_g4_i8|m.7788,lcl|c226454_g2_i17|m.11487,lcl|c234064_g1_i1|m.19391,lcl|c241464_g1_i3|m.28607,lcl|c241464_g1_i1|m.28602,lcl|c239574_g1_i8|m.26002,lcl|c225854_g1_i4|m.10994,lcl|c221676_…	Q15349,Q9WUT3,Q15418,Q13976,P51812,P10665,P10644,P10666,P18652,Q63531,Q6PFQ0,P18653,P18654,P00516,Q5REL1,Q21734,Q7TPS0,Q9UK32,P0C605	P11801,Q6GPN6,Q15418,Q96BR1,Q13557,O75582,Q63531,Q09137,Q5RCC4,Q6DE87,Q5REL1,Q21734,Q9DB30,A5GFW1,P49138,Q923T9,Q15349,P28652,Q3MHJ9,D2I3C6,P11730,Q9JLM8,P10644,P18652,Q6PFQ0,Q9UQM7,P18653,Q2HJF7,P18654,P13234,Q5ZKI0,Q9DG02,Q5R7A7,Q5MPA9,O61661,Q16566,P08413,P0C605,A8WXF6,Q9WUT3,Q8IW41,Q6PHZ2,Q13976,Q8BRK8,A8X6H4,Q91ZN7,Q66JF3,Q95266,P15791,Q28948,Q7TPS0,O77708,Q6DEH3,Q0V7M1,Q91819,P51812,P10665,…
GO:2000181	biological_process	negative regulation of blood vessel morphogenesis	0.00197595	165	0.00183435	150	-0.107283	0.509	1	0.00178781	0.00165715	-0.109485	0.499	1	0.892	GAGEAGYEERY,DTSSTSDIR,SGTVSIIGGGDTATCCAK,FDSTTASSSSAPTSR,YSLAPVVDELNK,TLIDGNITK,NKPTTQGDCSLETK,FLPDCVGPEVEEACLSPSPGSVILLENLR,GEYVEVFDPLTK,CNDEVLK,NVVNNYSNAEVK,GINLSGGQK,GVDSDGNKVK,ELVYFSK,FQEVVMK,IHLPTDFVAASK,SLFDEDGSK,IVNIVSGELNNAAAMK,VDFNVPLK,ENLYAIQTLK,ILALNDIR,LWDELSIGTESSR,FAQASSGIGSDSLK,FADDADTASATLESGIPADWMGLDIGPESLK,QGTDGWIAVGNEK,DVSTNDIPASEGR,FGGIEALVR,ALNNSSDAETTR,LGDIYVNDAFGTAHR,GAGEAG…	EVEEGLLK,GAGEAGYEERY,DTSSTSDIR,SGTVSIIGGGDTATCCAK,AGQYVLSGVQK,HCLDNGAQSVV,ELVSCSNCTDYQAR,YDLEAWFPGSGAFR,FDSTTASSSSAPTSR,YSLAPVVDELNK,TLIDGNITK,NKPTTQGDCSLETK,FLPDCVGPEVEEACLSPSPGSVILLENLR,NVVNNYSNAEVK,GINLSGGQK,SGGIPALVR,ELVYFSK,EIPGVTQQIVGEILK,IHLPTDFVAASK,SLFDEDGSK,TWGDSSVK,VSLIEFK,VDFNVPLK,ANSASSAMPIPSIPTPAIVTSPNASSPPSFI,ILALNDIR,KDGEAVETQSR,FAQASSGIGSDSLK,FADDADTASATLESGIPADWMGLDIGPESLK,ALNNS…	lcl|c236955_g1_i6|m.22720,lcl|c236955_g1_i2|m.22718,lcl|c226071_g2_i11|m.11178,lcl|c241349_g1_i1|m.28471,lcl|c226071_g2_i7|m.11182,lcl|c243541_g3_i2|m.31058,lcl|c243541_g3_i3|m.31059,lcl|c217312_g3_i2|m.5103,lcl|c226631_g6_i11|m.11647,lcl|c226071_g2_i1|m.11176,lcl|c217312_g3_i1|m.5102,lcl|c244084_g2_i1|m.31724,lcl|c226631_g6_i18|m.11658,lcl|c229667_g6_i8|m.14511,lcl|c241916_g1_i7|m.29148,lcl|c229…	lcl|c236955_g1_i6|m.22720,lcl|c229667_g6_i8|m.14511,lcl|c241916_g1_i7|m.29148,lcl|c236955_g1_i2|m.22718,lcl|c229667_g6_i13|m.14510,lcl|c226071_g2_i11|m.11178,lcl|c222542_g3_i2|m.8415,lcl|c243672_g3_i1|m.31224,lcl|c241349_g1_i1|m.28471,lcl|c226071_g2_i7|m.11182,lcl|c215316_g1_i1|m.3942,lcl|c241916_g1_i1|m.29147,lcl|c217096_g5_i1|m.4965,lcl|c241916_g1_i1|m.29146,lcl|c243541_g3_i2|m.31058,lcl|c24354…	Q7FB56,Q7GB25,A7KVC2,Q54JR2,Q29I35,P32386,P15884,Q54LE6,Q28689,Q8VZZ4,Q54V86,Q62655,Q8T6H3,P30998,B6V8E6,Q9R1S7,Q02453,Q8WNW3,Q8T6H8,Q99081,Q9QYM0,Q17GS9,O88563,Q06807,Q9LZJ5,Q60722,Q8CHU3,O60706,Q60HD8,P26638,Q6Y306,P38735,P35224,Q5T3U5,P35223,P35222,Q5F364,Q63563,Q54VJ0,P15881,O35379,P00558,Q42093,O88269,Q9BUL8,Q9C8H1,Q7QHW5,Q80WJ6,Q9C8H0,Q10RX7,O15440,Q9Y3M8,Q8VI47,Q864R9,B2RX12,A0A0D1CZ63,Q9C…	Q7FB56,Q7GB25,A7KVC2,Q54JR2,Q29I35,P32386,Q54LE6,Q28689,Q8VZZ4,Q54V86,Q8T6H3,P30998,B6V8E6,Q9R1S7,Q02453,Q8WNW3,Q8T6H8,Q9QYM0,Q17GS9,O88563,Q06807,Q9LZJ5,P29353,Q8CHU3,O60706,Q5M824,Q60HD8,P26638,Q6Y306,O93602,P38735,P35224,Q5T3U5,P35223,P35222,Q5F364,Q63563,Q54VJ0,O35379,P00558,Q42093,O88269,Q9BUL8,Q9C8H1,Q7QHW5,Q80WJ6,Q9C8H0,Q10RX7,O15440,Q9Y3M8,Q8VI47,Q864R9,B2RX12,A0A0D1CZ63,Q9C8G9,Q02257,Q8C…
GO:0035188	biological_process	hatching	2.4e-05	2	4.89e-05	4	1.03022	0.4	1	3.23e-05	5.49e-05	0.764115	0.463	1	0.892	QLSDVDSDTIQR	SSPPKAEGDSSPTSK,QLSDVDSDTIQR	lcl|c241254_g2_i1|m.28367,lcl|c241254_g2_i5|m.28370	lcl|c241254_g2_i1|m.28367,lcl|c241254_g2_i5|m.28370,lcl|c241254_g2_i5|m.28369	E9PVD1	E9PVD1
GO:0060100	biological_process	positive regulation of phagocytosis, engulfment	1.2e-05	1	2.45e-05	2	1.03022	0.551	1	2.15e-05	3.29e-05	0.612112	0.64	1	0.909	TSNLNEELGQVR	TSNLNEELGQVR	lcl|c234785_g1_i10|m.20251,lcl|c234785_g1_i5|m.20254	lcl|c234785_g1_i10|m.20251,lcl|c234785_g1_i5|m.20254	P98198,P98197,Q8TF62,P98199,Q9Y2Q0,Q9SAF5,P32660,Q9Y2G3,Q9XIE6,Q9SX33,O60423,P70704,P57792,Q9NTI2,Q12675,A3FIN4,Q9LK90,P98200,O43520,P98204,Q5BL50,Q9QZW0,C7EXK4,P39524,O94296,Q29449,Q8NB49,Q9LNQ4,Q9N0Z4,P98196,Q148W0,Q9U280,Q9LI83	P98198,P98197,Q8TF62,P98199,Q9Y2Q0,Q9SAF5,P32660,Q9Y2G3,Q9XIE6,Q9SX33,O60423,P70704,P57792,Q9NTI2,Q12675,A3FIN4,Q9LK90,P98200,O43520,P98204,Q5BL50,Q9QZW0,C7EXK4,P39524,O94296,Q29449,Q8NB49,Q9LNQ4,Q9N0Z4,P98196,Q148W0,Q9U280,Q9LI83
GO:0060101	biological_process	negative regulation of phagocytosis, engulfment	1.2e-05	1	2.45e-05	2	1.03022	0.551	1	2.15e-05	3.29e-05	0.612112	0.64	1	0.909	TSNLNEELGQVR	TSNLNEELGQVR	lcl|c234785_g1_i10|m.20251,lcl|c234785_g1_i5|m.20254	lcl|c234785_g1_i10|m.20251,lcl|c234785_g1_i5|m.20254	P98198,P98197,Q8TF62,P98199,Q9Y2Q0,Q9SAF5,P32660,Q9Y2G3,Q9XIE6,Q9SX33,O60423,P70704,P57792,Q9NTI2,Q12675,A3FIN4,Q9LK90,P98200,O43520,P98204,Q5BL50,Q9QZW0,C7EXK4,P39524,O94296,Q29449,Q8NB49,Q9LNQ4,Q9N0Z4,P98196,Q148W0,Q9U280,Q9LI83	P98198,P98197,Q8TF62,P98199,Q9Y2Q0,Q9SAF5,P32660,Q9Y2G3,Q9XIE6,Q9SX33,O60423,P70704,P57792,Q9NTI2,Q12675,A3FIN4,Q9LK90,P98200,O43520,P98204,Q5BL50,Q9QZW0,C7EXK4,P39524,O94296,Q29449,Q8NB49,Q9LNQ4,Q9N0Z4,P98196,Q148W0,Q9U280,Q9LI83
GO:0061433	biological_process	cellular response to caloric restriction	1.2e-05	1	0	0	null	0.322	1	2.15e-05	1.1e-05	-0.97285	0.575	1	0.892	NYTQNIDTLER		lcl|c229870_g2_i10|m.14708,lcl|c229870_g2_i3|m.14711		Q4R834,Q8IXJ6
GO:1903861	biological_process	positive regulation of dendrite extension	0.000671	56	0.000795	65	0.245234	0.35	1	0.000614	0.000724	0.238654	0.36	1	0.875	QTEALLQR,NFLEGDMK,MDLFEISEPNEDLEYR,GVSPVSNPELLK,IQQAEADLR,FGAQTATFFSR,QYTEEQLGTSEK,SVNVNNMADSMK,LGQVESWAQK,VTESEALGQSMIEAGNDFGPGTNYGSALVK,LLQFVTGTSR,ALTSFDLETR,FESLVEK,ASQAEFDR,DGSSISSDSDSQK,NNLLLDSYR	QTEALLQR,ASQAEFDRQYEVTK,MDLFEISEPNEDLEYR,ALLENYRPAPDELDIPR,GVSPVSNPELLK,IQQAEADLR,FGAQTATFFSR,QYTEEQLGTSEK,SVNVNNMADSMK,VTESEALGQSMIEAGNDFGPGTNYGSALVK,LLQFVTGTSR,SANPAPGGTR,FESLVEK,ASQAEFDR,EAVTGGDVTPR,NNLLLDSYR,DGPAAVDGR	lcl|c227910_g4_i2|m.12882,lcl|c227910_g4_i10|m.12878,lcl|c242839_g1_i1|m.30268,lcl|c233142_g2_i1|m.18198,lcl|c227910_g4_i13|m.12880,lcl|c233142_g2_i4|m.18201,lcl|c227910_g4_i7|m.12883,lcl|c227910_g4_i11|m.12879	lcl|c242839_g1_i1|m.30269,lcl|c227910_g4_i2|m.12882,lcl|c227910_g4_i10|m.12878,lcl|c242839_g1_i1|m.30268,lcl|c233142_g2_i1|m.18198,lcl|c169738_g3_i3|m.504,lcl|c169738_g3_i1|m.502,lcl|c227910_g4_i13|m.12880,lcl|c233142_g2_i4|m.18201,lcl|c227910_g4_i7|m.12883,lcl|c227910_g4_i11|m.12879,lcl|c169738_g3_i2|m.503	Q62940,Q5R8P5,Q5RBF2,Q9QZQ1,P46935,P46934,Q9JK48,Q9VVI3,Q96PU5,P55196,Q9Y371,Q8CFI0,O35889,Q5ZIR1	Q62940,Q5R8P5,Q5RBF2,Q9QZQ1,P46935,P46934,Q9JK48,Q9VVI3,Q96PU5,P55196,Q9Y371,O17798,Q8CFI0,O35889,Q5ZIR1
GO:1902531	biological_process	regulation of intracellular signal transduction	0.0583685	4874	0.0582588	4764	-0.0027121	0.924	1	0.0525035	0.0522937	-0.0057763	0.84	1	0.967	TGEDGDFLWPGFGENCR,NAVDEALEGIVAANPGLNIL,QITVNDLPVGR,YNPTEVGR,VLEQLTGQQPVFSK,QTNTSQWEMPSDEAATKV,YDPTIEDSYR,GNFDSLPVK,LFTDLREI,FVTGGCDNLVK,DETQTAEDKKEN,QLNEVLDKEDSSSPPEPTPE,IMAIVDPNGTGYVTF,AGAYDYPSPEWDTVTDEAK,QVEHEEDEDGISDENLK,IGSSGAPVTDQSEETR,LGSAASEASSPR,LMDEAMCSR,NAQSSSGGGSFNR,ILALNDIR,EPSEYDILHIQNQK,SEEDRITEAEKNER,LALADAGDTVEDANFVEK,LVDEPPPPLAPR,YGEYFPGTGDLR,IQDKEGIPPDQQR,GLFIIDDK,TFQDQGDTCR,SLI…	TGEDGDFLWPGFGENCR,GVEICIATPGR,NAVDEALEGIVAANPGLNIL,QITVNDLPVGR,VLEQLTGQQPVFSK,VETQEAQQQQLTTGEKLDK,YDPTIEDSYR,GNFDSLPVK,SSILSNDMSSLK,FVTGGCDNLVK,DETQTAEDKKEN,IMAIVDPNGTGYVTF,QVEHEEDEDGISDENLK,IGSSGAPVTDQSEETR,LGSAASEASSPR,LMDEAMCSR,NGQIIEMK,NAQSSSGGGSFNR,ILALNDIR,EPSEYDILHIQNQK,VPDGHSSSSASSR,SEEDRITEAEKNER,VPQLVLASEPIPSGDIA,LVDEPPPPLAPR,IFHVNWFR,EQIDEIKTK,YGEYFPGTGDLR,IQDKEGIPPDQQR,GLFIIDDK,TFQDQG…	lcl|c242947_g1_i3|m.30437,lcl|c243671_g5_i1|m.31222,lcl|c238372_g5_i2|m.24429,lcl|c240346_g7_i3|m.27102,lcl|c223629_g2_i2|m.9260,lcl|c232719_g2_i1|m.17712,lcl|c241047_g4_i1|m.28118,lcl|c221676_g4_i8|m.7788,lcl|c239246_g1_i11|m.25499,lcl|c239682_g2_i1|m.26160,lcl|c228623_g6_i3|m.13470,lcl|c244197_g2_i1|m.31877,lcl|c227562_g6_i1|m.12582,lcl|c221676_g4_i4|m.7786,lcl|c243541_g3_i2|m.31058,lcl|c241105…	lcl|c242947_g1_i3|m.30437,lcl|c243671_g5_i1|m.31222,lcl|c238372_g5_i2|m.24429,lcl|c240346_g7_i3|m.27102,lcl|c223629_g2_i2|m.9260,lcl|c296217_g1_i1|m.32460,lcl|c221676_g4_i8|m.7788,lcl|c232719_g2_i1|m.17712,lcl|c241047_g4_i1|m.28118,lcl|c239246_g1_i11|m.25499,lcl|c228623_g6_i3|m.13470,lcl|c244197_g2_i1|m.31877,lcl|c230742_g3_i2|m.15573,lcl|c223679_g2_i1|m.9304,lcl|c227562_g6_i1|m.12582,lcl|c221676…	O93377,P15007,Q9JJ19,P54613,P54612,Q5R7D3,Q8VHF0,Q9N1U2,O14786,Q8BYC6,Q92734,P05696,Q0VA61,Q05046,P36179,P39688,Q09639,Q4QQT4,Q9Z2V4,P36181,P10809,P54632,P30626,P49001,Q06124,Q9VFI9,Q64487,Q1LUA6,Q0III9,O61998,Q9JKR6,Q4QQW4,P27448,P27446,P41753,Q3SWX8,P55735,Q3SWY2,P25098,P32865,Q92538,Q80W83,Q8VHJ5,P15054,Q9TUG3,Q9V9J3,Q8C033,Q92769,Q6PFQ0,O62839,O60658,Q1KKS3,P42897,P42656,P42657,A0JNB0,Q54QR9,…	O93377,P15007,Q9JJ19,P54613,P54612,Q5R7D3,Q8VHF0,Q9N1U2,Q9DB30,O14786,Q8BYC6,Q92734,P05696,Q0VA61,Q05046,P36179,P39688,Q09639,Q4QQT4,Q9Z2V4,P36181,P10809,P54632,P30626,Q9Z136,P49001,Q06124,Q9VFI9,Q64487,Q0III9,O61998,Q9JKR6,Q4QQW4,P27448,P27446,P41753,Q3SWX8,P55735,P54646,Q3SWY2,P25098,P32865,Q92538,Q80W83,Q8VHJ5,P15054,Q9TUG3,Q9V9J3,Q8N264,Q8C033,Q92769,Q6P3K3,Q6PFQ0,O62839,O60658,Q1KKS3,P42897,…
GO:1903862	biological_process	positive regulation of oxidative phosphorylation	0.00341301	285	0.00372984	305	0.128068	0.28	1	0.0030802	0.00335821	0.124666	0.292	1	0.844	EMVELPLR,LAGESESNLR,SGTVSIIGGGDTATCCAK,LLVEEAINDDNSVVSMSQAK,GILLYGPPGTGK,TVIGGLTGSDPVSCSR,YSLAPVVDELNK,NSPAIIFIDEIDAIAPK,IHVLPIDDTVEGLTGNL,SVVVKPDMSLEDAIK,FLPDCVGPEVEEACLSPSPGSVILLENLR,GVDSDGNKVK,AFEEAEK,ELVYFSK,LGDDVDLEQIAAETHG,FQEVVMK,IHLPTDFVAASK,SLFDEDGSK,KAFEEAEK,VDFNVPLK,IVSQLLTLMDGLK,EVDIGIPDATGR,FADDADTASATLESGIPADWMGLDIGPESLK,EILQEQEK,VKEILQEQEK,FDREVDIGIPDATGR,LGDIYVNDAFGTAHR,TIVWNGPMGV…	EMVELPLR,EVDIGIPDATGRLEI,LAGESESNLR,SGTVSIIGGGDTATCCAK,IHVLPIDDTVEGLTGN,HCLDNGAQSVV,LLVEEAINDDNSVVSMSQAK,GILLYGPPGTGK,TVIGGLTGSDPVSCSR,YSLAPVVDELNK,IHVLPIDDTVEGLTGNL,SVVVKPDMSLEDAIK,FLPDCVGPEVEEACLSPSPGSVILLENLR,FDREVDIGIPDATG,AFEEAEK,TVIGGLTGSDPVSCS,ELVYFSK,LGDDVDLEQIAAETHG,IHLPTDFVAASK,SLFDEDGSK,KAFEEAEK,VDFNVPLK,IVSQLLTLMDGLK,EVDIGIPDATGR,FADDADTASATLESGIPADWMGLDIGPESLK,EILQEQEK,VKEILQEQEK,IHV…	lcl|c229538_g7_i4|m.14373,lcl|c215316_g1_i1|m.3942,lcl|c235754_g3_i10|m.21302,lcl|c226414_g3_i1|m.11460,lcl|c235754_g3_i1|m.21301,lcl|c234626_g4_i3|m.20042	lcl|c229538_g7_i4|m.14373,lcl|c215316_g1_i1|m.3942,lcl|c235754_g3_i10|m.21302,lcl|c226414_g3_i1|m.11460,lcl|c235754_g3_i1|m.21301,lcl|c234626_g4_i3|m.20042	Q9SCN8,Q9P3A7,P54774,Q5R658,P25694,A5A6K4,Q9UN37,Q7KN62,Q7ZU99,Q793F9,P54812,P54811,Q8VEJ9,Q96372,A0JMA9,P23787,Q5E946,Q60HD8,P46467,P55072,P03974,P46462,O75351,Q01853,Q0VD48,Q3ZBT1,P00558,P54609,Q5NVB5,Q9LZF6,Q6GL04,Q5AWS6	Q9SCN8,Q9P3A7,P54774,Q5R658,P25694,A5A6K4,Q9UN37,Q7KN62,Q7ZU99,Q793F9,P54812,P54811,Q8VEJ9,Q96372,A0JMA9,P23787,Q5E946,Q60HD8,P46467,P55072,P03974,P46462,O75351,Q01853,Q0VD48,Q3ZBT1,P00558,P54609,Q5NVB5,Q9LZF6,Q6GL04,Q5AWS6
GO:0035186	biological_process	syncytial blastoderm mitotic cell cycle	0.000251	21	0.000208	17	-0.274634	0.559	1	0.000237	0.000198	-0.262357	0.567	1	0.892	SSVLENFVGR,GISSLPINLR,VPVGDQPPDIEMLIR,GMEDLIPIMNK,IVANVNAMK,EIVAETDRETGSNK,SMAGEIGTLDPQMER,AIEGGGDSIDTK,WDVQEVAAFVK	SSVLENFVGR,SEVEPLWLYEHVK,IVANVNAMK,VGLFTPDMAFEAIVK,AIEGGGDSIDTK,EALKEHQ,WDVQEVAAFVK	lcl|c228773_g1_i2|m.13639,lcl|c239343_g4_i4|m.25612,lcl|c228773_g1_i1|m.13638	lcl|c228773_g1_i2|m.13639,lcl|c239343_g4_i4|m.25612,lcl|c228773_g1_i1|m.13638	Q05193,P50570,Q08877,P39769,Q9UQ16,Q08DF4,Q8BZ98,Q8QHL5,P39054,A6H7I5,P39053,P27619,P39055,P39052,Q8CHP6,P21575	Q05193,P50570,Q08877,P39769,Q9UQ16,Q08DF4,Q8BZ98,Q8QHL5,P39054,A6H7I5,P39053,P27619,P39055,P39052,Q8CHP6,P21575
[truncated: 12,741 more rows]

## Sheet: B_T2 R vs S metaGOmics
GO acc	GO aspect	GO name	Run 1 ratio	Run 1 PSM count	Run 2 ratio	Run 2 PSM count	Log(2) fold change	Raw p-value	Bonf. corr. p-value	Laplace corr. Run 1 ratio	Laplace corr. Run 2 ratio	Laplace corr. Log(2) fold change	Laplace corr. Raw p-value	Laplace corr. Bonf. corr p-value	Laplace corr. q-value	Run 1 peptides	Run 2 peptides	Run 1 proteins	Run 2 proteins	Run 1 blast hits	Run 2 blast hits
GO:0035166	biological_process	post-embryonic hemopoiesis	0.00011	10	7.42e-05	3	-0.568124	0.547	1	0.00011	8.05e-05	-0.448122	0.593	1	0.845	VVSQNPSER,NFVGDYIGYDDNPALR,FLDVTLNR,ASGVEDMVLLPK	YQESTNR,VASEPVEK,NFVGDYIGYDDNPALR	lcl|c225983_g2_i3|m.11118,lcl|c236793_g3_i7|m.22527,lcl|c236793_g3_i9|m.22532,lcl|c225983_g2_i10|m.11114,lcl|c236793_g3_i7|m.22528	lcl|c225983_g2_i3|m.11118,lcl|c236793_g3_i7|m.22527,lcl|c225983_g2_i10|m.11114,lcl|c236793_g3_i9|m.22532	Q2US45,Q05096,O43795,A4RE77,A1C4A5,Q59MQ0,P70303,A5E4A8,Q04439,P34092,A3LYL7,A8N2Y6,Q2HDI2,Q6CVE9,Q6PEI7,Q9Y7Z8,Q6GME1,P10569,Q6FN18,Q5U2N0,Q758Q9,Q1RMS2,A8PWF6,P70698,O00160,A5DKH0,Q7Z8J6,Q92002,A7TDZ8,E9Q634,P22467,P46735,Q2M197,Q0CEX5,P34109,Q7ZXP9,Q12965,A1DBH2,Q5XHA8,P36006,P0CP01,Q6BUQ2,A2R5J1,P0CP00,Q5F3Z1,P70248,Q63356,P42522,A6SED8,Q4WC55,P19706,A6ZMG6,B0Y9Q4,Q1DLP2,B0CRJ3,Q6FMJ3,Q9VUL1,…	Q2US45,Q05096,O43795,A4RE77,A1C4A5,Q59MQ0,P70303,A5E4A8,Q04439,P34092,A3LYL7,A8N2Y6,Q2HDI2,Q6CVE9,Q6PEI7,Q9Y7Z8,Q6GME1,P10569,Q6FN18,Q5U2N0,Q758Q9,Q1RMS2,A8PWF6,P70698,O00160,A5DKH0,Q7Z8J6,Q92002,A7TDZ8,E9Q634,P22467,P46735,Q2M197,Q0CEX5,P34109,Q7ZXP9,Q12965,A1DBH2,Q5XHA8,P36006,P0CP01,Q6BUQ2,A2R5J1,P0CP00,Q5F3Z1,P70248,Q63356,P42522,A6SED8,Q4WC55,P19706,A6ZMG6,B0Y9Q4,Q1DLP2,B0CRJ3,Q6FMJ3,Q9VUL1,…
[truncated: 12,914 more rows]
