# Supplementary material for: Resilience in a time of stress: revealing the molecular underpinnings of coral survival following thermal bleaching events
Source: Research Square preprint supplement (doi:10.21203/rs.3.rs-4566379/v1), 2024-07-03
Supplement: Supplementary file 4 [file bb89e489ad4a5fb11e633cd7.xlsx]

## Sheet: README
TAB	DESCRIPTION
A_microbiome_Sequence_counts	Per-sample sequence counts after each quality control and filtering step.
B_microbiome_Metadata	Metadata and mapping information. Data cells are compatible with qiime2 metadata format.

## Sheet: A_microbiome_Sequence_counts
Per-sample sequence counts after each quality control and filtering step.
		dada2 QC					Taxonomic filtering		Rarefaction
sample-id	initial sequence count	filtered	percentage of input passed filter	denoised	non-chimeric	percentage of input non-chimeric	Non-organelle	percentage of QC’d non-organelle	Rarefied
M5NB.T1	74675	59852	80.15	58239	46694	62.53	45340	97.1	10000
M10NB.T1	64504	53964	83.66	53801	37619	58.32	37134	98.71	10000
M13NB.T1	60530	50748	83.84	49892	30640	50.62	22876	74.66	10000
M20NB.T1	66762	54918	82.26	53602	37206	55.73	37072	99.64	10000
M21NB.T1	98955	85319	86.22	84878	58413	59.03	55656	95.28	10000
M25NB.T1	125708	105871	84.22	103867	77273	61.47	72273	94.35	10000
M26NB.T1	65769	53884	81.93	51925	37922	57.66	36807	97.06	10000
M28NB.T1	16459	14137	85.89	13783	10076	61.22	10018	99.43	10000
M55NB.T1	57092	45999	80.57	44729	31566	55.29	31042	98.34	10000
M66NB.T1	59831	49127	82.11	48538	36335	60.73	34896	96.04	10000
M73NB.T1	101703	82735	81.35	81956	60899	59.88	57227	93.97	10000
M74NB.T1	67682	53759	79.43	52883	38139	56.35	36453	95.58	10000
M5NB.T2	104110	88639	85.14	88002	60634	58.24	59076	97.43	10000
M10NB.T2	74954	63021	84.08	61914	41547	55.43	41547	98.65	10000
M13NB.T2	159161	138916	87.28	136743	98775	62.06	98469	99.69	10000
M20NB.T2	65440	54021	82.55	52866	31894	51.08	28485	89.31	10000
M21NB.T2	52502	42637	81.21	41711	27621	52.61	26055	94.33	10000
M25NB.T2	51156	42822	83.71	41549	27384	53.53	25377	92.67	10000
M26NB.T2	55368	48042	86.77	46193	30585	55.24	29511	96.49	10000
M28NB.T2	26105	21829	83.62	21008	15235	58.36	13395	87.92	10000
M55NB.T2	88308	73860	83.64	72873	52614	59.58	48284	91.77	10000
M66NB.T2	63943	54364	85.02	52537	39255	61.39	38486	98.04	10000
M73NB.T2	44141	35701	80.88	34483	25920	58.72	24323	93.84	10000
M74NB.T2	62486	52325	83.74	50874	35186	56.31	34042	96.75	10000
M5B.T2	89009	76619	86.08	75359	53566	60.18	44733	83.51	10000
M10B.T2	26991	22203	82.26	21188	15774	58.44	14383	91.18	10000
M13B.T2	58512	49729	84.99	48526	33592	57.41	32692	97.32	10000
M20B.T2	55922	55922	82.48	55203	30735	54.96	29303	95.34	10000
M21B.T2	89484	78406	87.62	77231	55856	62.42	49304	88.27	10000
M25B.T2	47786	40880	85.55	39918	28442	59.52	26915	94.63	10000
M26B.T2	25370	20745	81.77	20037	15689	61.84	15493	98.75	10000
M28B.T2	93222	80982	86.87	79523	52829	56.67	52200	98.81	10000
M55B.T2	69770	58872	84.38	57966	38324	54.93	34553	90.16	10000
M66B.T2	68218	57794	84.72	56647	43237	63.38	40392	93.42	10000
M73B.T2	55633	47405	85.21	45968	30721	55.22	29302	95.38	10000
M74B.T2	85558	73991	86.48	72572	51840	60.59	51596	99.53	10000

## Sheet: B_microbiome_Metadata
S1b. Metadata and mapping information
Data cells are compatible with qiime2 metadata format.
#SampleID	BarcodeSequence	LinkerPrimerSequence	BarcodeName	ReversePrimer	ProjectName	Description	Study	Survival_State	Bleaching_State	Time	Time_&_Status	Susceptible_Status	Susceptible_Status_Time	Colony_Number	tissue_healthy
M10B.T2	CTCTTTCC	AGRGTTTGATCMTGGCTCAG	uHPill27Fbar13	GTNTTACNGCGGCKGCTG	061820JPG27F	M10B.T2	Live_vs_Dead	Survivor	Bleached	T2	T2_B	Survivor_B	T2_B_R	10	n
M10NB.T0	CTAGTTAC	AGRGTTTGATCMTGGCTCAG	uHPill27Fbar1	GTNTTACNGCGGCKGCTG	061820JPG27F	M10NB.T0	Live_vs_Dead	Survivor	Nonbleached	T1	T1	Survivor_NB	T1_R	10	y
M10NB.T2	CTTTGGTT	AGRGTTTGATCMTGGCTCAG	uHPill27Fbar7	GTNTTACNGCGGCKGCTG	061820JPG27F	M10NB.T2	Live_vs_Dead	Survivor	Nonbleached	T2	T2_NB	Survivor_NB	T2_NB_R	10	y
M13B.T2	CTAACTGA	AGRGTTTGATCMTGGCTCAG	uHPill27Fbar14	GTNTTACNGCGGCKGCTG	061820JPG27F	M13B.T2	Live_vs_Dead	Survivor	Bleached	T2	T2_B	Survivor_B	T2_B_R	13	y
M13NB.T0	CTGGAAGA	AGRGTTTGATCMTGGCTCAG	uHPill27Fbar2	GTNTTACNGCGGCKGCTG	061820JPG27F	M13NB.T0	Live_vs_Dead	Survivor	Nonbleached	T1	T1	Survivor_NB	T1_R	13
M13NB.T2	CTCGATTA	AGRGTTTGATCMTGGCTCAG	uHPill27Fbar8	GTNTTACNGCGGCKGCTG	061820JPG27F	M13NB.T2	Live_vs_Dead	Survivor	Nonbleached	T2	T2_NB	Survivor_NB	T2_NB_R	13
M21B.T2	CTAGAACT	AGRGTTTGATCMTGGCTCAG	uHPill27Fbar15	GTNTTACNGCGGCKGCTG	061820JPG27F	M21B.T2	Live_vs_Dead	Survivor	Bleached	T2	T2_B	Survivor_NB	T2_B_R	21
M21NB.T0	CTTGCGAA	AGRGTTTGATCMTGGCTCAG	uHPill27Fbar3	GTNTTACNGCGGCKGCTG	061820JPG27F	M21NB.T0	Live_vs_Dead	Survivor	Nonbleached	T1	T1	Survivor_NB	T1_R	21
M21NB.T2	CTTTCCTA	AGRGTTTGATCMTGGCTCAG	uHPill27Fbar9	GTNTTACNGCGGCKGCTG	061820JPG27F	M21NB.T2	Live_vs_Dead	Survivor	Nonbleached	T2	T2_NB	Survivor_NB	T2_NB_R	21
M26B.T2	CTCAGCAG	AGRGTTTGATCMTGGCTCAG	uHPill27Fbar16	GTNTTACNGCGGCKGCTG	061820JPG27F	M26B.T2	Live_vs_Dead	Survivor	Bleached	T2	T2_B	Survivor_B	T2_B_R	26
M26NB.T0	CTATTGGA	AGRGTTTGATCMTGGCTCAG	uHPill27Fbar4	GTNTTACNGCGGCKGCTG	061820JPG27F	M26NB.T0	Live_vs_Dead	Survivor	Nonbleached	T1	T1	Survivor_NB	T1_R	26
M26NB.T2	CTCCTCTC	AGRGTTTGATCMTGGCTCAG	uHPill27Fbar10	GTNTTACNGCGGCKGCTG	061820JPG27F	M26NB.T2	Live_vs_Dead	Survivor	Nonbleached	T2	T2_NB	Survivor_NB	T2_NB_R	26
M66B.T2	CTCTCCGG	AGRGTTTGATCMTGGCTCAG	uHPill27Fbar17	GTNTTACNGCGGCKGCTG	061820JPG27F	M66B.T2	Live_vs_Dead	Survivor	Bleached	T2	T2_B	Survivor_B	T2_B_R	66
M66NB.T0	CTCCGGCG	AGRGTTTGATCMTGGCTCAG	uHPill27Fbar5	GTNTTACNGCGGCKGCTG	061820JPG27F	M66NB.T0	Live_vs_Dead	Survivor	Nonbleached	T1	T1	Survivor_NB	T1_R	66
M66NB.T2	CTGCATCT	AGRGTTTGATCMTGGCTCAG	uHPill27Fbar11	GTNTTACNGCGGCKGCTG	061820JPG27F	M66NB.T2	Live_vs_Dead	Survivor	Nonbleached	T2	T2_NB	Survivor_NB	T2_NB_R	66
M74B.T2	CTGCAGAA	AGRGTTTGATCMTGGCTCAG	uHPill27Fbar30	GTNTTACNGCGGCKGCTG	061820JPG27F	M74B.T2	Live_vs_Dead	Survivor	Bleached	T2	T2_B	Survivor_B	T2_B_R	74
M74NB.T0	CTAGTCTT	AGRGTTTGATCMTGGCTCAG	uHPill27Fbar6	GTNTTACNGCGGCKGCTG	061820JPG27F	M74NB.T0	Live_vs_Dead	Survivor	Nonbleached	T1	T1	Survivor_NB	T1_R	74
M74NB.T2	CTCATGTG	AGRGTTTGATCMTGGCTCAG	uHPill27Fbar12	GTNTTACNGCGGCKGCTG	061820JPG27F	M74NB.T2	Live_vs_Dead	Survivor	Nonbleached	T2	T2_NB	Survivor_NB	T2_NB_R	74
M5T0	CTAGTTAC	AGRGTTTGATCMTGGCTCAG	uHPill27Fbar1	GTNTTACNGCGGCKGCTG	110420JPG27F	M5T0	Live_vs_Dead	Susceptible	Nonbleached	T1	T1	Susceptible_NB	T1_S	5
M20T0	CTGGAAGA	AGRGTTTGATCMTGGCTCAG	uHPill27Fbar2	GTNTTACNGCGGCKGCTG	110420JPG27F	M20T0	Live_vs_Dead	Susceptible	Nonbleached	T1	T1	Susceptible_NB	T1_S	20
M25T0	CTTGCGAA	AGRGTTTGATCMTGGCTCAG	uHPill27Fbar3	GTNTTACNGCGGCKGCTG	110420JPG27F	M25T0	Live_vs_Dead	Susceptible	Nonbleached	T1	T1	Susceptible_NB	T1_S	25
M28T0	CTATTGGA	AGRGTTTGATCMTGGCTCAG	uHPill27Fbar4	GTNTTACNGCGGCKGCTG	110420JPG27F	M28T0	Live_vs_Dead	Susceptible	Nonbleached	T1	T1	Susceptible_NB	T1_S	28
M55T0	CTCCGGCG	AGRGTTTGATCMTGGCTCAG	uHPill27Fbar5	GTNTTACNGCGGCKGCTG	110420JPG27F	M55T0	Live_vs_Dead	Susceptible	Nonbleached	T1	T1	Susceptible_NB	T1_S	55
M73T0	CTAGTCTT	AGRGTTTGATCMTGGCTCAG	uHPill27Fbar6	GTNTTACNGCGGCKGCTG	110420JPG27F	M73T0	Live_vs_Dead	Susceptible	Nonbleached	T1	T1	Susceptible_NB	T1_S	73
M5T2B	CTTTGGTT	AGRGTTTGATCMTGGCTCAG	uHPill27Fbar7	GTNTTACNGCGGCKGCTG	110420JPG27F	M5T2B	Live_vs_Dead	Susceptible	Bleached	T2	T2_B	Susceptible_B	T2_B_S	5
M20T2B	CTCGATTA	AGRGTTTGATCMTGGCTCAG	uHPill27Fbar8	GTNTTACNGCGGCKGCTG	110420JPG27F	M20T2B	Live_vs_Dead	Susceptible	Bleached	T2	T2_B	Susceptible_B	T2_B_S	20
M25T2B	CTTTCCTA	AGRGTTTGATCMTGGCTCAG	uHPill27Fbar9	GTNTTACNGCGGCKGCTG	110420JPG27F	M25T2B	Live_vs_Dead	Susceptible	Bleached	T2	T2_B	Susceptible_B	T2_B_S	25
M28T2B	CTCCTCTC	AGRGTTTGATCMTGGCTCAG	uHPill27Fbar10	GTNTTACNGCGGCKGCTG	110420JPG27F	M28T2B	Live_vs_Dead	Susceptible	Bleached	T2	T2_B	Susceptible_B	T2_B_S	28
M55T2B	CTGCATCT	AGRGTTTGATCMTGGCTCAG	uHPill27Fbar11	GTNTTACNGCGGCKGCTG	110420JPG27F	M55T2B	Live_vs_Dead	Susceptible	Bleached	T2	T2_B	Susceptible_B	T2_B_S	55
M73T2B	CTCATGTG	AGRGTTTGATCMTGGCTCAG	uHPill27Fbar12	GTNTTACNGCGGCKGCTG	110420JPG27F	M73T2B	Live_vs_Dead	Susceptible	Bleached	T2	T2_B	Susceptible_B	T2_B_S	73
M5T2NB	CTCTTTCC	AGRGTTTGATCMTGGCTCAG	uHPill27Fbar13	GTNTTACNGCGGCKGCTG	110420JPG27F	M5T2NB	Live_vs_Dead	Susceptible	Nonbleached	T2	T2_NB	Susceptible_NB	T2_NB_S	5
M20T2NB	CTAACTGA	AGRGTTTGATCMTGGCTCAG	uHPill27Fbar14	GTNTTACNGCGGCKGCTG	110420JPG27F	M20T2NB	Live_vs_Dead	Susceptible	Nonbleached	T2	T2_NB	Susceptible_NB	T2_NB_S	20
M25T2NB	CTAGAACT	AGRGTTTGATCMTGGCTCAG	uHPill27Fbar15	GTNTTACNGCGGCKGCTG	110420JPG27F	M25T2NB	Live_vs_Dead	Susceptible	Nonbleached	T2	T2_NB	Susceptible_NB	T2_NB_S	25
M28T2NB	CTCAGCAG	AGRGTTTGATCMTGGCTCAG	uHPill27Fbar16	GTNTTACNGCGGCKGCTG	110420JPG27F	M28T2NB	Live_vs_Dead	Susceptible	Nonbleached	T2	T2_NB	Susceptible_NB	T2_NB_S	28
M55T2NB	CTCTCCGG	AGRGTTTGATCMTGGCTCAG	uHPill27Fbar17	GTNTTACNGCGGCKGCTG	110420JPG27F	M55T2NB	Live_vs_Dead	Susceptible	Nonbleached	T2	T2_NB	Susceptible_NB	T2_NB_S	55
M73T2NB	CTTCAACA	AGRGTTTGATCMTGGCTCAG	uHPill27Fbar18	GTNTTACNGCGGCKGCTG	110420JPG27F	M73T2NB	Live_vs_Dead	Susceptible	Nonbleached	T2	T2_NB	Susceptible_NB	T2_NB_S	73
